# Supplementary material for: Identification and functional analysis of circular RNAs during mitochondrial damage induced by infectious bovine rhinotracheitis virus infection in Madin–Darby bovine kidney cells
Source: Research Square preprint supplement (doi:10.21203/rs.3.rs-6754910/v1), 2025-06-20
Supplement: Supplementary file 1 [file 1e87f718f47311d30fea1419.xlsx]

## Sheet: Table S19
Table S19：Predicted results for RBPs of circRNAs
uniprot	gene ID	Symbol	RNA_ID	Top_RNA_fragment	Annotation	Interaction_Propensity	Z_score	RBP_Propensity	RNA_Binding_Domains_IDs	numof.RNA.Binding_Domains_Instances	RNA.Binding_Motifs_IDs	numof.RNA_Binding_Motifs_Instances	Ranking
Q863B3	ENSBTAG00000010692	SND1	novel.circ.000597	1043-1094	-	88.5	4.01	1	PF00565,PF00567	6	Q7KZF4|SND1|K562.SND1.2.81|31226278|eCLIP_ENCODE,Q7KZF4|SND1|HepG2.SND1.0.91|31226278|eCLIP_ENCODE;Q7KZF4|SND1|K562.SND1.3.75|31226278|eCLIP_ENCODE,Q7KZF4|SND1|K562.SND1.6.82|31226278|eCLIP_ENCODE	2	1
Q863B3	ENSBTAG00000010692	SND1	novel.circ.000259	409-460	-	71.72	3.35	1	PF00565,PF00567	6	Q7KZF4|SND1|HepG2.SND1.5.68|31226278|eCLIP_ENCODE;Q7KZF4|SND1|K562.SND1.2.81|31226278|eCLIP_ENCODE,Q7KZF4|SND1|HepG2.SND1.0.91|31226278|eCLIP_ENCODE	2	0.972792
Q28141	ENSBTAG00000019821	DHX9	novel.circ.003178	151-202	-	51.13	2.8	1	PF00035,PF00271,PF04408,PF07717,PF00270	6	Q08211|DHX9|435|23361462|PDB	2	0.95
A6QR44	ENSBTAG00000019869	DGCR8	novel.circ.000848	1541-1610	-	68.4	2.72	1	PF00035	2	Q8WYQ5|DGCR8|K562.DGCR8.1.60|31226278|eCLIP_ENCODE	2	0.946667
Q3MHX3	ENSBTAG00000031688	RBM4	novel.circ.001086	158-209	-	48.45	2.62	1	PF00076,PF13893,PF00098	4	Q9BWF3|RBM4|278|31724725|RBNS_ENCODE,Q9BWF3|RBM4|gcgcgss|19561594|RBPMap,Q9BWF3|RBM4|s102|19561594|SpliceAid-F	2	0.942375
Q3T0I4	ENSBTAG00000008498	ALYREF	novel.circ.003929	788-857	-	65.19	2.54	1	PF00076,PF13865	2	Q86V81|ALYREF|CUUCG|28934468|iCLIP	7	0.939042
Q3MHX3	ENSBTAG00000031688	RBM4	novel.circ.002368	326-377	-	50.63	2.38	1	PF00076,PF13893,PF00098	4	Q9BWF3|RBM4|278|31724725|RBNS_ENCODE,Q9BWF3|RBM4|gcgcgss|19561594|RBPMap,Q9BWF3|RBM4|s102|19561594|SpliceAid-F	3	0.932542
Q3ZBG7	ENSBTAG00000012803	SRP19	novel.circ.003929	788-857	-	60.27	2.26	1	PF01922	1	P09132|SRP19|547|20179341|PDB	6	0.927333
P67808	ENSBTAG00000017368	YBX1	novel.circ.004264	2689-2858	-	91.04	2.23	1	PF00313	1	P67809|YBX1|1293|18503770|SpliceAid-F,P67809|YBX1|1321|19273129|AEDB,P67809|YBX1|1290|11447123|SpliceAid-F,P67809|YBX1|1339|11447123|AEDB,P67809|YBX1|1291|11447123|SpliceAid-F;P67809|YBX1|124|15798215|RBPDB	4	0.926292
Q3ZBG7	ENSBTAG00000012803	SRP19	novel.circ.003307	126-177	-	41.03	2.11	1	PF01922	1	P09132|SRP19|547|20179341|PDB	2	0.921333
Q3MHX3	ENSBTAG00000031688	RBM4	novel.circ.003929	788-857	-	57.28	2.09	1	PF00076,PF13893,PF00098	4	Q9BWF3|RBM4|278|31724725|RBNS_ENCODE,Q9BWF3|RBM4|gcgcgss|19561594|RBPMap,Q9BWF3|RBM4|s102|19561594|SpliceAid-F;Q9BWF3|RBM4|1146|16260624|SpliceAid-F,Q9BWF3|RBM4|1145|16777844|SpliceAid-F,Q9BWF3|RBM4|1147|21518792|SpliceAid-F;Q9BWF3|RBM4|279|31724725|RBNS_ENCODE,Q9BWF3|RBM4|280|31724725|RBNS_ENCODE	12	0.92025
Q9XSJ0	ENSBTAG00000013620	UCHL5	novel.circ.004264	2689-2858	-	87.21	2.06	1	PF01088,PF18031	2	Q9Y5K5|UCHL5|HepG2.UCHL5.4.200|31226278|eCLIP_ENCODE;Q9Y5K5|UCHL5|K562.UCHL5.6.175|31226278|eCLIP_ENCODE	2	0.919375
Q3ZBG7	ENSBTAG00000012803	SRP19	novel.circ.002715	526-577	-	49.42	2.04	1	PF01922	1	P09132|SRP19|547|20179341|PDB	5	0.918417
Q863B3	ENSBTAG00000010692	SND1	novel.circ.004264	515-684	-	85.95	2.01	1	PF00565,PF00567	6	Q7KZF4|SND1|HepG2.SND1.5.68|31226278|eCLIP_ENCODE;Q7KZF4|SND1|K562.SND1.4.86|31226278|eCLIP_ENCODE	5	0.917083
Q863B3	ENSBTAG00000010692	SND1	novel.circ.002790	76-127	-	47.39	1.92	1	PF00565,PF00567	6	Q7KZF4|SND1|HepG2.SND1.5.68|31226278|eCLIP_ENCODE;Q7KZF4|SND1|HepG2.SND1.4.87|31226278|eCLIP_ENCODE	3	0.913458
P61286	ENSBTAG00000046358	PABPC1	novel.circ.003627	726-777	-	49.29	1.9	1	PF00076,PF00658	5	P11940|PABPC1|416|10499800|PDB,P11940|PABPC1|452|10499800|PDB,P11940|PABPC1|480|23041282|PDB	3	0.912333
Q3ZBG7	ENSBTAG00000012803	SRP19	novel.circ.003178	50-101	-	37.74	1.89	1	PF01922	1	P09132|SRP19|547|20179341|PDB	4	0.911958
Q3MHX3	ENSBTAG00000031688	RBM4	novel.circ.003178	50-101	-	36.01	1.77	1	PF00076,PF13893,PF00098	4	Q9BWF3|RBM4|278|31724725|RBNS_ENCODE,Q9BWF3|RBM4|gcgcgss|19561594|RBPMap,Q9BWF3|RBM4|s102|19561594|SpliceAid-F	2	0.907083
Q3ZBG7	ENSBTAG00000012803	SRP19	novel.circ.001449	451-12	back-splicing_junction	39.22	1.67	1	PF01922	1	P09132|SRP19|547|20179341|PDB	7	0.902958
Q0V898	ENSBTAG00000007453	NELFE	novel.circ.001043	12581-13106	-	177.03	1.58	1	PF00076	1	P18615|NELFE|122|18303858|RBPDB,P18615|NELFE|6|18303858|RBPDB;P18615|NELFE|21|18303858|RBPDB	4	0.899333
Q3ZBJ1	ENSBTAG00000008873	NCBP2	novel.circ.002368	326-377	-	37.25	1.55	1	PF00076	1	P52298|NCBP2|HepG2.NCBP2.3.88|31226278|eCLIP_ENCODE,P52298|NCBP2|K562.NCBP2.4.87|31226278|eCLIP_ENCODE,P52298|NCBP2|HepG2.NCBP2.7.125|31226278|eCLIP_ENCODE	3	0.897875
Q3MHX3	ENSBTAG00000031688	RBM4	novel.circ.001449	451-12	back-splicing_junction	37.26	1.55	1	PF00076,PF13893,PF00098	4	Q9BWF3|RBM4|278|31724725|RBNS_ENCODE,Q9BWF3|RBM4|gcgcgss|19561594|RBPMap,Q9BWF3|RBM4|s102|19561594|SpliceAid-F;Q9BWF3|RBM4|279|31724725|RBNS_ENCODE,Q9BWF3|RBM4|280|31724725|RBNS_ENCODE	2	0.897875
Q863B3	ENSBTAG00000010692	SND1	novel.circ.004326	1691-1822	-	61.22	1.54	1	PF00565,PF00567	6	Q7KZF4|SND1|K562.SND1.2.81|31226278|eCLIP_ENCODE,Q7KZF4|SND1|HepG2.SND1.0.91|31226278|eCLIP_ENCODE	2	0.897417
Q863B3	ENSBTAG00000010692	SND1	novel.circ.003752	1275-1472	-	88.46	1.45	1	PF00565,PF00567	6	Q7KZF4|SND1|K562.SND1.2.81|31226278|eCLIP_ENCODE,Q7KZF4|SND1|HepG2.SND1.0.91|31226278|eCLIP_ENCODE;Q7KZF4|SND1|K562.SND1.4.86|31226278|eCLIP_ENCODE;Q7KZF4|SND1|HepG2.SND1.4.87|31226278|eCLIP_ENCODE	4	0.893708
Q28141	ENSBTAG00000019821	DHX9	novel.circ.004264	515-684	-	72.43	1.42	1	PF00035,PF00271,PF04408,PF07717,PF00270	6	Q08211|DHX9|435|23361462|PDB	3	0.892667
P61286	ENSBTAG00000046358	PABPC1	novel.circ.001814	801-852	-	39.91	1.36	1	PF00076,PF00658	5	P11940|PABPC1|416|10499800|PDB,P11940|PABPC1|452|10499800|PDB,P11940|PABPC1|480|23041282|PDB	2	0.890083
Q3ZBG7	ENSBTAG00000012803	SRP19	novel.circ.002790	353-404	-	37.62	1.35	1	PF01922	1	P09132|SRP19|547|20179341|PDB	2	0.889625
P67808	ENSBTAG00000017368	YBX1	novel.circ.003929	788-857	-	44.36	1.35	1	PF00313	1	P67809|YBX1|124|15798215|RBPDB;P67809|YBX1|1293|18503770|SpliceAid-F,P67809|YBX1|1321|19273129|AEDB,P67809|YBX1|1290|11447123|SpliceAid-F,P67809|YBX1|1339|11447123|AEDB,P67809|YBX1|1291|11447123|SpliceAid-F	2	0.889542
Q2HJ60	ENSBTAG00000005726	HNRNPA2B1	novel.circ.003929	788-857	-	43.25	1.29	1	PF00076	2	P22626|HNRNPA2B1|707|11024030|SpliceAid-F,P22626|HNRNPA2B1|708|16548521|SpliceAid-F,P22626|HNRNPA2B1|705|11024030|SpliceAid-F,P22626|HNRNPA2B1|125|12415010|RBPD	2	0.886917
Q3ZBG7	ENSBTAG00000012803	SRP19	novel.circ.000084	103-154	-	28.8	1.28	1	PF01922	1	P09132|SRP19|547|20179341|PDB	2	0.886583
Q3ZBJ1	ENSBTAG00000008873	NCBP2	novel.circ.003929	788-857	-	42.91	1.27	1	PF00076	1	P52298|NCBP2|HepG2.NCBP2.3.88|31226278|eCLIP_ENCODE,P52298|NCBP2|K562.NCBP2.4.87|31226278|eCLIP_ENCODE,P52298|NCBP2|HepG2.NCBP2.7.125|31226278|eCLIP_ENCODE;P52298|NCBP2|HepG2.NCBP2.5.83|31226278|eCLIP_ENCODE	8	0.886125
Q3SZR8	ENSBTAG00000040006	SRSF3	novel.circ.003929	788-857	-	42.91	1.27	1	PF00076	1	P84103|SRSF3|UGGAC|26876937|PAR-CLIP;P84103|SRSF3|ugcygyy|19296853|RBPMap;P84103|SRSF3|starBase_6|26876937|PAR-CLIP,P84103|SRSF3|1354|19273129|AEDB,P84103|SRSF3|starBase_3|26876937|PAR-CLIP	4	0.886125
Q863B3	ENSBTAG00000010692	SND1	novel.circ.001229	4969-5206	-	87.19	1.26	1	PF00565,PF00567	6	Q7KZF4|SND1|HepG2.SND1.5.68|31226278|eCLIP_ENCODE;Q7KZF4|SND1|K562.SND1.4.86|31226278|eCLIP_ENCODE	2	0.885708
Q3MHX3	ENSBTAG00000031688	RBM4	novel.circ.002475	178-229	-	28.29	1.24	1	PF00076,PF13893,PF00098	4	Q9BWF3|RBM4|278|31724725|RBNS_ENCODE,Q9BWF3|RBM4|gcgcgss|19561594|RBPMap,Q9BWF3|RBM4|s102|19561594|SpliceAid-F;Q9BWF3|RBM4|279|31724725|RBNS_ENCODE,Q9BWF3|RBM4|280|31724725|RBNS_ENCODE	2	0.885167
Q3SZR8	ENSBTAG00000040006	SRSF3	novel.circ.003307	126-177	-	28.25	1.24	1	PF00076	1	P84103|SRSF3|UGGAC|26876937|PAR-CLIP;P84103|SRSF3|s41|10094314|SpliceAid-F,P84103|SRSF3|1249|17036044|SpliceAid-F,P84103|SRSF3|1251|17036044|SpliceAid-F,P84103|SRSF3|starBase_1|26876937|PAR-CLIP,P84103|SRSF3|NA|NA|NA	3	0.885042
F1MJM0	ENSBTAG00000019133	ZNF326	novel.circ.001043	12319-12844	-	162.74	1.24	1	PF04988	1	Q5BKZ1|ZNF326|452|31724725|RBNS_ENCODE;Q5BKZ1|ZNF326|450|31724725|RBNS_ENCODE	3	0.884958
Q2KIV0	ENSBTAG00000051118	NOL12	novel.circ.001043	12581-13106	-	162.47	1.23	1	PF09805	1	Q9UGY1|NOL12|HepG2.NOL12.2.48|31226278|eCLIP_ENCODE;Q9UGY1|NOL12|HepG2.NOL12.9.52|31226278|eCLIP_ENCODE	6	0.884667
Q1RMU5	ENSBTAG00000006330	RBM5	novel.circ.004264	515-684	-	67.97	1.23	1	PF01585,PF17780,PF00076,PF00641,PF12656	5	P52756|RBM5|1148|18840686|SpliceAid-F,P52756|RBM5|UCAUC|24332178|HITS-CLIP	2	0.884625
Q3MHX3	ENSBTAG00000031688	RBM4	novel.circ.002790	353-404	-	35.55	1.23	1	PF00076,PF13893,PF00098	4	Q9BWF3|RBM4|278|31724725|RBNS_ENCODE,Q9BWF3|RBM4|gcgcgss|19561594|RBPMap,Q9BWF3|RBM4|s102|19561594|SpliceAid-F;Q9BWF3|RBM4|279|31724725|RBNS_ENCODE,Q9BWF3|RBM4|280|31724725|RBNS_ENCODE	2	0.884583
Q2HJ60	ENSBTAG00000005726	HNRNPA2B1	novel.circ.002715	526-577	-	35.32	1.22	1	PF00076	2	P22626|HNRNPA2B1|707|11024030|SpliceAid-F,P22626|HNRNPA2B1|708|16548521|SpliceAid-F,P22626|HNRNPA2B1|705|11024030|SpliceAid-F,P22626|HNRNPA2B1|125|12415010|RBPD	3	0.884
Q3T0I4	ENSBTAG00000008498	ALYREF	novel.circ.003155	8-59	-	27.73	1.21	1	PF00076,PF13865	2	Q86V81|ALYREF|CUUCG|28934468|iCLIP	2	0.883583
Q3SZR8	ENSBTAG00000040006	SRSF3	novel.circ.002715	526-577	-	35.09	1.2	1	PF00076	1	P84103|SRSF3|s41|10094314|SpliceAid-F,P84103|SRSF3|1249|17036044|SpliceAid-F,P84103|SRSF3|1251|17036044|SpliceAid-F,P84103|SRSF3|starBase_1|26876937|PAR-CLIP,P84103|SRSF3|NA|NA|NA;P84103|SRSF3|ugcygyy|19296853|RBPMap;P84103|SRSF3|UGGAC|26876937|PAR-CLIP	5	0.883458
Q3ZBJ1	ENSBTAG00000008873	NCBP2	novel.circ.002715	526-577	-	34.64	1.18	1	PF00076	1	P52298|NCBP2|HepG2.NCBP2.3.88|31226278|eCLIP_ENCODE,P52298|NCBP2|K562.NCBP2.4.87|31226278|eCLIP_ENCODE,P52298|NCBP2|HepG2.NCBP2.7.125|31226278|eCLIP_ENCODE	2	0.882375
Q3SZR8	ENSBTAG00000040006	SRSF3	novel.circ.003178	50-101	-	26.95	1.15	1	PF00076	1	P84103|SRSF3|UGGAC|26876937|PAR-CLIP;P84103|SRSF3|starBase_6|26876937|PAR-CLIP,P84103|SRSF3|1354|19273129|AEDB,P84103|SRSF3|starBase_3|26876937|PAR-CLIP	2	0.881333
Q3T0Q6	ENSBTAG00000012159	CNBP	novel.circ.003929	788-857	-	40.16	1.11	1	PF00098	7	P62633|CNBP||NA|NA	2	0.879583
Q1RMU5	ENSBTAG00000006330	RBM5	novel.circ.001043	12581-13106	-	154.6	1.04	1	PF01585,PF17780,PF00076,PF00641,PF12656	5	P52756|RBM5|1148|18840686|SpliceAid-F,P52756|RBM5|UCAUC|24332178|HITS-CLIP	6	0.876792
Q863B3	ENSBTAG00000010692	SND1	novel.circ.001043	12581-13106	-	154.34	1.04	1	PF00565,PF00567	6	Q7KZF4|SND1|HepG2.SND1.5.68|31226278|eCLIP_ENCODE;Q7KZF4|SND1|K562.SND1.4.86|31226278|eCLIP_ENCODE;Q7KZF4|SND1|HepG2.SND1.4.87|31226278|eCLIP_ENCODE	8	0.8765
Q3ZBG7	ENSBTAG00000012803	SRP19	novel.circ.002263	39-90	-	31.62	1	1	PF01922	1	P09132|SRP19|547|20179341|PDB	2	0.875
Q3ZBG7	ENSBTAG00000012803	SRP19	novel.circ.002477	522-573	-	33.3	0.98	1	PF01922	1	P09132|SRP19|547|20179341|PDB	2	0.874375
Q2T9U1	ENSBTAG00000019085	SRP54	novel.circ.002187	220-271	-	27.88	0.97	1	PF00448,PF02978,PF02881,PF02492	4	P61011|SRP54|456|12244299|PDB	2	0.873583
Q2T9U1	ENSBTAG00000019085	SRP54	novel.circ.000493	1109-1160	-	33.95	0.95	1	PF00448,PF02978,PF02881,PF02492	4	P61011|SRP54|456|12244299|PDB	2	0.872833
Q3MHX3	ENSBTAG00000031688	RBM4	novel.circ.004264	2773-2942	-	61.32	0.94	1	PF00076,PF13893,PF00098	4	Q9BWF3|RBM4|1146|16260624|SpliceAid-F,Q9BWF3|RBM4|1145|16777844|SpliceAid-F,Q9BWF3|RBM4|1147|21518792|SpliceAid-F;Q9BWF3|RBM4|278|31724725|RBNS_ENCODE,Q9BWF3|RBM4|gcgcgss|19561594|RBPMap,Q9BWF3|RBM4|s102|19561594|SpliceAid-F	6	0.872583
Q3T0I4	ENSBTAG00000008498	ALYREF	novel.circ.004264	2773-2942	-	61.28	0.94	1	PF00076,PF13865	2	Q86V81|ALYREF|CUUCG|28934468|iCLIP	2	0.872542
Q5E9J1	ENSBTAG00000008853	HNRNPF	novel.circ.003307	126-177	-	23.84	0.94	1	PF00076,PF08080	3	P52597|HNRNPF|gugkau|22574288|RBPMap,P52597|HNRNPF|815|19506027|SpliceAid-F,P52597|HNRNPF|1331|12612063|AEDB,P52597|HNRNPF|817|12612063|SpliceAid-F,P52597|HNRNPF|836|NA|NA	3	0.872542
Q3SZR8	ENSBTAG00000040006	SRSF3	novel.circ.001449	451-12	back-splicing_junction	27.47	0.94	1	PF00076	1	P84103|SRSF3|UGGAC|26876937|PAR-CLIP;P84103|SRSF3|s41|10094314|SpliceAid-F,P84103|SRSF3|1249|17036044|SpliceAid-F,P84103|SRSF3|1251|17036044|SpliceAid-F,P84103|SRSF3|starBase_1|26876937|PAR-CLIP,P84103|SRSF3|NA|NA|NA	4	0.8725
Q2KIV0	ENSBTAG00000051118	NOL12	novel.circ.004264	2773-2942	-	60.75	0.92	1	PF09805	1	Q9UGY1|NOL12|HepG2.NOL12.9.52|31226278|eCLIP_ENCODE;Q9UGY1|NOL12|HepG2.NOL12.2.48|31226278|eCLIP_ENCODE	2	0.871583
Q3T127	ENSBTAG00000023610	U2AF1L4	novel.circ.004264	2773-2942	-	60.17	0.89	1	PF00642,PF00076	3	Q01081|U2AF1|K562.U2AF1.6.335|31226278|eCLIP_ENCODE,Q01081|U2AF1|HepG2.U2AF1.5.461|31226278|eCLIP_ENCODE;Q01081|U2AF1|K562.U2AF1.2.166|31226278|eCLIP_ENCODE;Q01081|U2AF1|HepG2.U2AF1.0.228|31226278|eCLIP_ENCODE,Q01081|U2AF1|K562.U2AF1.4.144|31226278|eCLIP_ENCODE;Q01081|U2AF1|K562.U2AF1.1.191|31226278|eCLIP_ENCODE	7	0.870542
Q3T0I4	ENSBTAG00000008498	ALYREF	novel.circ.000848	851-920	-	36.24	0.89	1	PF00076,PF13865	2	Q86V81|ALYREF|CUUCG|28934468|iCLIP	2	0.87025
Q3ZBG7	ENSBTAG00000012803	SRP19	novel.circ.002745	326-377	-	26.57	0.88	1	PF01922	1	P09132|SRP19|547|20179341|PDB	3	0.870208
Q2HJ60	ENSBTAG00000005726	HNRNPA2B1	novel.circ.004264	2689-2858	-	59.58	0.87	1	PF00076	2	P22626|HNRNPA2B1|707|11024030|SpliceAid-F,P22626|HNRNPA2B1|708|16548521|SpliceAid-F,P22626|HNRNPA2B1|705|11024030|SpliceAid-F,P22626|HNRNPA2B1|125|12415010|RBPD	2	0.869458
Q2T9U1	ENSBTAG00000019085	SRP54	novel.circ.001043	12581-13106	-	145.54	0.82	1	PF00448,PF02978,PF02881,PF02492	4	P61011|SRP54|456|12244299|PDB	14	0.867667
Q5E9J1	ENSBTAG00000008853	HNRNPF	novel.circ.003178	50-101	-	22.06	0.82	1	PF00076,PF08080	3	P52597|HNRNPF|gugkau|22574288|RBPMap,P52597|HNRNPF|815|19506027|SpliceAid-F,P52597|HNRNPF|1331|12612063|AEDB,P52597|HNRNPF|817|12612063|SpliceAid-F,P52597|HNRNPF|836|NA|NA;P52597|HNRNPF|gukgykg|22574288|RBPMap	4	0.867458
Q2T9U1	ENSBTAG00000019085	SRP54	novel.circ.003627	726-777	-	30.29	0.81	1	PF00448,PF02978,PF02881,PF02492	4	P61011|SRP54|456|12244299|PDB	3	0.86725
Q3ZBG7	ENSBTAG00000012803	SRP19	novel.circ.000720	77-128	-	30.24	0.81	1	PF01922	1	P09132|SRP19|547|20179341|PDB	5	0.867125
Q2T9U1	ENSBTAG00000019085	SRP54	novel.circ.004328	251-37	back-splicing_junction	21.94	0.81	1	PF00448,PF02978,PF02881,PF02492	4	P61011|SRP54|456|12244299|PDB	2	0.867125
Q5E9J1	ENSBTAG00000008853	HNRNPF	novel.circ.002715	526-577	-	28.38	0.81	1	PF00076,PF08080	3	P52597|HNRNPF|gugkau|22574288|RBPMap,P52597|HNRNPF|815|19506027|SpliceAid-F,P52597|HNRNPF|1331|12612063|AEDB,P52597|HNRNPF|817|12612063|SpliceAid-F,P52597|HNRNPF|836|NA|NA;P52597|HNRNPF|gukgykg|22574288|RBPMap	3	0.867083
Q3ZBG7	ENSBTAG00000012803	SRP19	novel.circ.001669	237-288	-	25.32	0.81	1	PF01922	1	P09132|SRP19|547|20179341|PDB	2	0.866958
Q2T9U1	ENSBTAG00000019085	SRP54	novel.circ.001049	101-152	-	26.74	0.8	1	PF00448,PF02978,PF02881,PF02492	4	P61011|SRP54|456|12244299|PDB	2	0.866875
Q3ZBG7	ENSBTAG00000012803	SRP19	novel.circ.004264	3025-3194	-	58.13	0.8	1	PF01922	1	P09132|SRP19|547|20179341|PDB	10	0.866833
Q2T9U1	ENSBTAG00000019085	SRP54	novel.circ.001068	76-127	-	21.81	0.8	1	PF00448,PF02978,PF02881,PF02492	4	P61011|SRP54|456|12244299|PDB	2	0.86675
Q3ZBG7	ENSBTAG00000012803	SRP19	novel.circ.002424	706-761	-	31.22	0.8	1	PF01922	1	P09132|SRP19|547|20179341|PDB	3	0.866458
Q2T9U1	ENSBTAG00000019085	SRP54	novel.circ.003178	151-202	-	21.6	0.79	1	PF00448,PF02978,PF02881,PF02492	4	P61011|SRP54|456|12244299|PDB	4	0.866167
Q3ZBG7	ENSBTAG00000012803	SRP19	novel.circ.002584	176-227	-	28.86	0.78	1	PF01922	1	P09132|SRP19|547|20179341|PDB	5	0.866
Q2T9U1	ENSBTAG00000019085	SRP54	novel.circ.001323	504-555	-	27.85	0.78	1	PF00448,PF02978,PF02881,PF02492	4	P61011|SRP54|456|12244299|PDB	2	0.865792
Q3SZR8	ENSBTAG00000040006	SRSF3	novel.circ.001435	161-212	-	25.89	0.75	1	PF00076	1	P84103|SRSF3|UGGAC|26876937|PAR-CLIP	2	0.86475
Q3ZBG7	ENSBTAG00000012803	SRP19	novel.circ.004321	673-724	-	27.38	0.75	1	PF01922	1	P09132|SRP19|547|20179341|PDB	2	0.864667
Q2T9U1	ENSBTAG00000019085	SRP54	novel.circ.001209	876-927	-	29.12	0.75	1	PF00448,PF02978,PF02881,PF02492	4	P61011|SRP54|456|12244299|PDB	3	0.864458
Q3SZR8	ENSBTAG00000040006	SRSF3	novel.circ.000084	103-154	-	20.97	0.74	1	PF00076	1	P84103|SRSF3|UGGAC|26876937|PAR-CLIP	2	0.864375
Q5E9J1	ENSBTAG00000008853	HNRNPF	novel.circ.003929	788-857	-	33.75	0.74	1	PF00076,PF08080	3	P52597|HNRNPF|gugkau|22574288|RBPMap,P52597|HNRNPF|815|19506027|SpliceAid-F,P52597|HNRNPF|1331|12612063|AEDB,P52597|HNRNPF|817|12612063|SpliceAid-F,P52597|HNRNPF|836|NA|NA;P52597|HNRNPF|gukgykg|22574288|RBPMap	6	0.864333
Q1RMU5	ENSBTAG00000006330	RBM5	novel.circ.003752	1275-1472	-	69.41	0.74	1	PF01585,PF17780,PF00076,PF00641,PF12656	5	P52756|RBM5|1148|18840686|SpliceAid-F,P52756|RBM5|UCAUC|24332178|HITS-CLIP	2	0.864125
A1A4K8	ENSBTAG00000011645	U2AF1	novel.circ.004264	2773-2942	-	56.56	0.74	1	PF00642,PF00076	3	Q01081|U2AF1|K562.U2AF1.6.335|31226278|eCLIP_ENCODE,Q01081|U2AF1|HepG2.U2AF1.5.461|31226278|eCLIP_ENCODE;Q01081|U2AF1|K562.U2AF1.2.166|31226278|eCLIP_ENCODE;Q01081|U2AF1|HepG2.U2AF1.0.228|31226278|eCLIP_ENCODE,Q01081|U2AF1|K562.U2AF1.4.144|31226278|eCLIP_ENCODE;Q01081|U2AF1|K562.U2AF1.1.191|31226278|eCLIP_ENCODE	7	0.864
Q3ZBJ1	ENSBTAG00000008873	NCBP2	novel.circ.001043	12581-13106	-	141.68	0.73	1	PF00076	1	P52298|NCBP2|K562.NCBP2.0.66|31226278|eCLIP_ENCODE;P52298|NCBP2|HepG2.NCBP2.5.83|31226278|eCLIP_ENCODE;P52298|NCBP2|HepG2.NCBP2.3.88|31226278|eCLIP_ENCODE,P52298|NCBP2|K562.NCBP2.4.87|31226278|eCLIP_ENCODE,P52298|NCBP2|HepG2.NCBP2.7.125|31226278|eCLIP_ENCODE	26	0.863792
P61286	ENSBTAG00000046358	PABPC1	novel.circ.001300	92-181	-	37.04	0.73	1	PF00076,PF00658	5	P11940|PABPC1|416|10499800|PDB,P11940|PABPC1|452|10499800|PDB,P11940|PABPC1|480|23041282|PDB	3	0.863792
Q1RMU5	ENSBTAG00000006330	RBM5	novel.circ.004326	1691-1822	-	45.35	0.73	1	PF01585,PF17780,PF00076,PF00641,PF12656	5	P52756|RBM5|1148|18840686|SpliceAid-F,P52756|RBM5|UCAUC|24332178|HITS-CLIP	2	0.86375
Q3SZR8	ENSBTAG00000040006	SRSF3	novel.circ.002790	353-404	-	27	0.73	1	PF00076	1	P84103|SRSF3|UGGAC|26876937|PAR-CLIP	2	0.863708
Q2KIR1	ENSBTAG00000009077	SNRPA	novel.circ.002715	542-593	-	26.94	0.73	1	PF00076	2	P09012|SNRPA|M348_0.6|10094314|cisBP-RNA,P09012|SNRPA|M347_0.6|10094314|cisBP-RNA	2	0.863583
Q2T9U1	ENSBTAG00000019085	SRP54	novel.circ.002533	1-52	-	20.59	0.72	1	PF00448,PF02978,PF02881,PF02492	4	P61011|SRP54|456|12244299|PDB	3	0.863292
Q2HJ60	ENSBTAG00000005726	HNRNPA2B1	novel.circ.002790	353-404	-	26.7	0.71	1	PF00076	2	P22626|HNRNPA2B1|707|11024030|SpliceAid-F,P22626|HNRNPA2B1|708|16548521|SpliceAid-F,P22626|HNRNPA2B1|705|11024030|SpliceAid-F,P22626|HNRNPA2B1|125|12415010|RBPD	2	0.863
A1A4K8	ENSBTAG00000011645	U2AF1	novel.circ.000847	921-974	-	29.73	0.71	1	PF00642,PF00076	3	Q01081|U2AF1|K562.U2AF1.1.191|31226278|eCLIP_ENCODE	2	0.862958
Q3T127	ENSBTAG00000023610	U2AF1L4	novel.circ.000847	921-974	-	29.4	0.69	1	PF00642,PF00076	3	Q01081|U2AF1|K562.U2AF1.1.191|31226278|eCLIP_ENCODE	2	0.862208
Q863B3	ENSBTAG00000010692	SND1	novel.circ.000016	6001-6302	-	87.05	0.68	1	PF00565,PF00567	6	Q7KZF4|SND1|HepG2.SND1.5.68|31226278|eCLIP_ENCODE;Q7KZF4|SND1|K562.SND1.3.75|31226278|eCLIP_ENCODE,Q7KZF4|SND1|K562.SND1.6.82|31226278|eCLIP_ENCODE	2	0.86175
Q2T9U1	ENSBTAG00000019085	SRP54	novel.circ.000720	502-553	-	27.9	0.68	1	PF00448,PF02978,PF02881,PF02492	4	P61011|SRP54|456|12244299|PDB	5	0.861583
P61286	ENSBTAG00000046358	PABPC1	novel.circ.001043	12581-13106	-	138.99	0.67	1	PF00076,PF00658	5	P11940|PABPC1|416|10499800|PDB,P11940|PABPC1|452|10499800|PDB,P11940|PABPC1|480|23041282|PDB	4	0.861083
Q3ZBG7	ENSBTAG00000012803	SRP19	novel.circ.001043	12581-13106	-	138.67	0.66	1	PF01922	1	P09132|SRP19|547|20179341|PDB	14	0.86075
Q2T9U1	ENSBTAG00000019085	SRP54	novel.circ.004264	2867-3036	-	54.75	0.66	1	PF00448,PF02978,PF02881,PF02492	4	P61011|SRP54|456|12244299|PDB	10	0.86075
Q3T0Q6	ENSBTAG00000012159	CNBP	novel.circ.001435	161-212	-	24.29	0.66	1	PF00098	7	P62633|CNBP||NA|NA	3	0.860667
Q863B3	ENSBTAG00000010692	SND1	novel.circ.002834	4449-5006	-	146.06	0.65	1	PF00565,PF00567	6	Q7KZF4|SND1|K562.SND1.3.75|31226278|eCLIP_ENCODE,Q7KZF4|SND1|K562.SND1.6.82|31226278|eCLIP_ENCODE;Q7KZF4|SND1|K562.SND1.4.86|31226278|eCLIP_ENCODE;Q7KZF4|SND1|HepG2.SND1.5.68|31226278|eCLIP_ENCODE;Q7KZF4|SND1|HepG2.SND1.4.87|31226278|eCLIP_ENCODE	9	0.860458
Q3ZBG7	ENSBTAG00000012803	SRP19	novel.circ.001209	22-73	-	27.42	0.65	1	PF01922	1	P09132|SRP19|547|20179341|PDB	3	0.860417
Q5E9J1	ENSBTAG00000008853	HNRNPF	novel.circ.001449	451-12	back-splicing_junction	22.59	0.64	1	PF00076,PF08080	3	P52597|HNRNPF|gugkau|22574288|RBPMap,P52597|HNRNPF|815|19506027|SpliceAid-F,P52597|HNRNPF|1331|12612063|AEDB,P52597|HNRNPF|817|12612063|SpliceAid-F,P52597|HNRNPF|836|NA|NA	3	0.859875
Q3T0I4	ENSBTAG00000008498	ALYREF	novel.circ.001209	22-73	-	27.16	0.64	1	PF00076,PF13865	2	Q86V81|ALYREF|CUUCG|28934468|iCLIP	2	0.859833
Q3T0I4	ENSBTAG00000008498	ALYREF	novel.circ.000227	953-1022	-	31.82	0.63	1	PF00076,PF13865	2	Q86V81|ALYREF|CUUCG|28934468|iCLIP	3	0.85975
Q1RMJ7	ENSBTAG00000010393	TRNAU1AP	novel.circ.004264	2773-2942	-	54.14	0.63	1	PF17654,PF00076	3	Q9NX07|TRNAU1AP|427|31724725|RBNS_ENCODE,Q9NX07|TRNAU1AP|428|31724725|RBNS_ENCODE	2	0.859625
A1A4K8	ENSBTAG00000011645	U2AF1	novel.circ.000848	851-920	-	31.41	0.61	1	PF00642,PF00076	3	Q01081|U2AF1|K562.U2AF1.2.166|31226278|eCLIP_ENCODE;Q01081|U2AF1|K562.U2AF1.6.335|31226278|eCLIP_ENCODE,Q01081|U2AF1|HepG2.U2AF1.5.461|31226278|eCLIP_ENCODE	2	0.858792
Q3T127	ENSBTAG00000023610	U2AF1L4	novel.circ.002424	1135-1190	-	27.77	0.6	1	PF00642,PF00076	3	Q01081|U2AF1|K562.U2AF1.6.335|31226278|eCLIP_ENCODE,Q01081|U2AF1|HepG2.U2AF1.5.461|31226278|eCLIP_ENCODE	2	0.858375
Q1LZB6	ENSBTAG00000016744	CAPRIN1	novel.circ.000685	1887-57	back-splicing_junction	32.07	0.59	1	PF12287,PF18293	2	Q14444|CAPRIN1|WWWUAAAW|24393468|PAR-CLIP,Q14444|CAPRIN1|TWWAAATWW|24393468|PAR-CLIP	2	0.857917
Q2T9U1	ENSBTAG00000019085	SRP54	novel.circ.000597	1043-1094	-	27.53	0.59	1	PF00448,PF02978,PF02881,PF02492	4	P61011|SRP54|456|12244299|PDB	2	0.857833
Q2KIR1	ENSBTAG00000009077	SNRPA	novel.circ.001449	451-12	back-splicing_junction	21.71	0.58	1	PF00076	2	P09012|SNRPA|M348_0.6|10094314|cisBP-RNA,P09012|SNRPA|M347_0.6|10094314|cisBP-RNA	2	0.857583
Q3T127	ENSBTAG00000023610	U2AF1L4	novel.circ.000848	851-920	-	30.53	0.56	1	PF00642,PF00076	3	Q01081|U2AF1|K562.U2AF1.2.166|31226278|eCLIP_ENCODE;Q01081|U2AF1|K562.U2AF1.6.335|31226278|eCLIP_ENCODE,Q01081|U2AF1|HepG2.U2AF1.5.461|31226278|eCLIP_ENCODE	2	0.856708
A1A4K8	ENSBTAG00000011645	U2AF1	novel.circ.003863	865-916	-	26.99	0.56	1	PF00642,PF00076	3	Q01081|U2AF1|K562.U2AF1.1.191|31226278|eCLIP_ENCODE;Q01081|U2AF1|HepG2.U2AF1.0.228|31226278|eCLIP_ENCODE,Q01081|U2AF1|K562.U2AF1.4.144|31226278|eCLIP_ENCODE;Q01081|U2AF1|K562.U2AF1.6.335|31226278|eCLIP_ENCODE,Q01081|U2AF1|HepG2.U2AF1.5.461|31226278|eCLIP_ENCODE	4	0.856542
Q3ZBV2	ENSBTAG00000003570	DDX19A	novel.circ.001043	12581-13106	-	134.4	0.56	1	PF00270,PF00271	2	Q9UMR2|DDX19B|554|19219046|PDB,Q9UMR2|DDX19B|332|19244245|PDB	20	0.856458
A1A4K8	ENSBTAG00000011645	U2AF1	novel.circ.002424	1135-1190	-	26.91	0.55	1	PF00642,PF00076	3	Q01081|U2AF1|K562.U2AF1.6.335|31226278|eCLIP_ENCODE,Q01081|U2AF1|HepG2.U2AF1.5.461|31226278|eCLIP_ENCODE	2	0.856375
Q3ZBG7	ENSBTAG00000012803	SRP19	novel.circ.003305	651-702	-	24.69	0.54	1	PF01922	1	P09132|SRP19|547|20179341|PDB	2	0.855917
Q3T0I4	ENSBTAG00000008498	ALYREF	novel.circ.001814	676-727	-	25.44	0.54	1	PF00076,PF13865	2	Q86V81|ALYREF|CUUCG|28934468|iCLIP	2	0.85575
Q5EA53	ENSBTAG00000021016	GTF2F1	novel.circ.001043	12581-13106	-	133.57	0.54	1	PF05793	1	P35269|GTF2F1|K562.GTF2F1.1.466|31226278|eCLIP_ENCODE,P35269|GTF2F1|HepG2.GTF2F1.1.345|31226278|eCLIP_ENCODE	20	0.855625
Q2T9U1	ENSBTAG00000019085	SRP54	novel.circ.000928	3241-3962	-	178.1	0.53	1	PF00448,PF02978,PF02881,PF02492	4	P61011|SRP54|456|12244299|PDB	32	0.855583
P67808	ENSBTAG00000017368	YBX1	novel.circ.001229	5854-177	back-splicing_junction	67.81	0.52	1	PF00313	1	P67809|YBX1|1293|18503770|SpliceAid-F,P67809|YBX1|1321|19273129|AEDB,P67809|YBX1|1290|11447123|SpliceAid-F,P67809|YBX1|1339|11447123|AEDB,P67809|YBX1|1291|11447123|SpliceAid-F;P67809|YBX1|124|15798215|RBPDB	3	0.855208
Q3SZR8	ENSBTAG00000040006	SRSF3	novel.circ.001806	76-127	-	20.76	0.52	1	PF00076	1	P84103|SRSF3|UGGAC|26876937|PAR-CLIP	2	0.855125
Q2KIV0	ENSBTAG00000051118	NOL12	novel.circ.003040	742-37	back-splicing_junction	23.46	0.52	1	PF09805	1	Q9UGY1|NOL12|HepG2.NOL12.2.48|31226278|eCLIP_ENCODE	3	0.855083
Q2T9U1	ENSBTAG00000019085	SRP54	novel.circ.002876	232-307	-	30.43	0.5	1	PF00448,PF02978,PF02881,PF02492	4	P61011|SRP54|456|12244299|PDB	2	0.853958
Q2T9U1	ENSBTAG00000019085	SRP54	novel.circ.002715	17-68	-	22.72	0.48	1	PF00448,PF02978,PF02881,PF02492	4	P61011|SRP54|456|12244299|PDB	5	0.853292
Q3ZBG7	ENSBTAG00000012803	SRP19	novel.circ.000227	171-240	-	29.02	0.48	1	PF01922	1	P09132|SRP19|547|20179341|PDB	7	0.853125
Q3SZR8	ENSBTAG00000040006	SRSF3	novel.circ.000704	167-218	-	17	0.48	1	PF00076	1	P84103|SRSF3|UGGAC|26876937|PAR-CLIP;P84103|SRSF3|s41|10094314|SpliceAid-F,P84103|SRSF3|1249|17036044|SpliceAid-F,P84103|SRSF3|1251|17036044|SpliceAid-F,P84103|SRSF3|starBase_1|26876937|PAR-CLIP,P84103|SRSF3|NA|NA|NA;P84103|SRSF3|starBase_6|26876937|PAR-CLIP,P84103|SRSF3|1354|19273129|AEDB,P84103|SRSF3|starBase_3|26876937|PAR-CLIP	3	0.853125
Q3MHX3	ENSBTAG00000031688	RBM4	novel.circ.003608	201-252	-	19.87	0.47	1	PF00076,PF13893,PF00098	4	Q9BWF3|RBM4|1146|16260624|SpliceAid-F,Q9BWF3|RBM4|1145|16777844|SpliceAid-F,Q9BWF3|RBM4|1147|21518792|SpliceAid-F;Q9BWF3|RBM4|278|31724725|RBNS_ENCODE,Q9BWF3|RBM4|gcgcgss|19561594|RBPMap,Q9BWF3|RBM4|s102|19561594|SpliceAid-F	2	0.852833
Q2T9U1	ENSBTAG00000019085	SRP54	novel.circ.000201	679-730	-	23.37	0.46	1	PF00448,PF02978,PF02881,PF02492	4	P61011|SRP54|456|12244299|PDB	3	0.852708
Q5E9J1	ENSBTAG00000008853	HNRNPF	novel.circ.001435	161-212	-	21.13	0.46	1	PF00076,PF08080	3	P52597|HNRNPF|gugkau|22574288|RBPMap,P52597|HNRNPF|815|19506027|SpliceAid-F,P52597|HNRNPF|1331|12612063|AEDB,P52597|HNRNPF|817|12612063|SpliceAid-F,P52597|HNRNPF|836|NA|NA	3	0.852667
Q2T9U1	ENSBTAG00000019085	SRP54	novel.circ.001245	476-527	-	24.98	0.46	1	PF00448,PF02978,PF02881,PF02492	4	P61011|SRP54|456|12244299|PDB	5	0.852458
Q5W9D7	ENSBTAG00000011593	QKI	novel.circ.001043	12581-13106	-	130.35	0.46	1	PF16544,PF16551,PF00013	3	Q96PU8|QKI|M046_0.6|23846655|cisBP-RNA;Q96PU8|QKI|83|15273320|RBPDB,Q96PU8|QKI|70|15273320|RBPDB	4	0.852417
Q863B3	ENSBTAG00000010692	SND1	novel.circ.001806	301-352	-	19.67	0.46	1	PF00565,PF00567	6	Q7KZF4|SND1|HepG2.SND1.5.68|31226278|eCLIP_ENCODE	2	0.852292
Q3SZR8	ENSBTAG00000040006	SRSF3	novel.circ.002263	39-90	-	22.31	0.46	1	PF00076	1	P84103|SRSF3|s41|10094314|SpliceAid-F,P84103|SRSF3|1249|17036044|SpliceAid-F,P84103|SRSF3|1251|17036044|SpliceAid-F,P84103|SRSF3|starBase_1|26876937|PAR-CLIP,P84103|SRSF3|NA|NA|NA;P84103|SRSF3|UGGAC|26876937|PAR-CLIP	2	0.852292
P67808	ENSBTAG00000017368	YBX1	novel.circ.004326	781-912	-	39.72	0.44	1	PF00313	1	P67809|YBX1|1293|18503770|SpliceAid-F,P67809|YBX1|1321|19273129|AEDB,P67809|YBX1|1290|11447123|SpliceAid-F,P67809|YBX1|1339|11447123|AEDB,P67809|YBX1|1291|11447123|SpliceAid-F	2	0.851833
Q3T0I4	ENSBTAG00000008498	ALYREF	novel.circ.001046	75-126	-	19.17	0.42	1	PF00076,PF13865	2	Q86V81|ALYREF|CUUCG|28934468|iCLIP	2	0.851
Q0V898	ENSBTAG00000007453	NELFE	novel.circ.000928	3241-3962	-	172.37	0.42	1	PF00076	1	P18615|NELFE|122|18303858|RBPDB,P18615|NELFE|6|18303858|RBPDB;P18615|NELFE|21|18303858|RBPDB	11	0.850958
Q3SZR8	ENSBTAG00000040006	SRSF3	novel.circ.000237	26-77	-	19.03	0.42	1	PF00076	1	P84103|SRSF3|UGGAC|26876937|PAR-CLIP;P84103|SRSF3|starBase_4|26876937|PAR-CLIP,P84103|SRSF3|s81|10022858|SpliceAid-F,P84103|SRSF3|1245|17036044|SpliceAid-F,P84103|SRSF3|1244|17036044|SpliceAid-F,P84103|SRSF3|NA|NA|NA	3	0.850667
Q3ZBG7	ENSBTAG00000012803	SRP19	novel.circ.002533	219-270	-	16.1	0.41	1	PF01922	1	P09132|SRP19|547|20179341|PDB	3	0.850542
Q1JQD2	ENSBTAG00000000080	GRWD1	novel.circ.001681	420-471	-	18.95	0.41	1	PF00400,PF12265	3	Q9BQ67|GRWD1|HepG2.GRWD1.8.169|31226278|eCLIP_ENCODE;Q9BQ67|GRWD1|HepG2.GRWD1.6.332|31226278|eCLIP_ENCODE,Q9BQ67|GRWD1|HepG2.GRWD1.2.313|31226278|eCLIP_ENCODE	2	0.850458
Q3T0Q6	ENSBTAG00000012159	CNBP	novel.circ.002263	39-90	-	21.49	0.41	1	PF00098	7	P62633|CNBP||NA|NA	2	0.850292
A6QR44	ENSBTAG00000019869	DGCR8	novel.circ.001043	12581-13106	-	128.12	0.4	1	PF00035	2	Q8WYQ5|DGCR8|K562.DGCR8.1.60|31226278|eCLIP_ENCODE	3	0.850167
Q3T0I4	ENSBTAG00000008498	ALYREF	novel.circ.004326	1626-1757	-	38.76	0.4	1	PF00076,PF13865	2	Q86V81|ALYREF|CUUCG|28934468|iCLIP	2	0.849792
Q5E9J1	ENSBTAG00000008853	HNRNPF	novel.circ.002790	353-404	-	21.27	0.39	1	PF00076,PF08080	3	P52597|HNRNPF|gugkau|22574288|RBPMap,P52597|HNRNPF|815|19506027|SpliceAid-F,P52597|HNRNPF|1331|12612063|AEDB,P52597|HNRNPF|817|12612063|SpliceAid-F,P52597|HNRNPF|836|NA|NA	3	0.84975
Q1RMU5	ENSBTAG00000006330	RBM5	novel.circ.002834	4449-5006	-	134.39	0.38	1	PF01585,PF17780,PF00076,PF00641,PF12656	5	P52756|RBM5|1148|18840686|SpliceAid-F,P52756|RBM5|UCAUC|24332178|HITS-CLIP	4	0.849208
Q3ZBG7	ENSBTAG00000012803	SRP19	novel.circ.004326	2016-2147	-	38.48	0.38	1	PF01922	1	P09132|SRP19|547|20179341|PDB	4	0.849167
Q3SZR8	ENSBTAG00000040006	SRSF3	novel.circ.002477	522-573	-	22.67	0.38	1	PF00076	1	P84103|SRSF3|starBase_6|26876937|PAR-CLIP,P84103|SRSF3|1354|19273129|AEDB,P84103|SRSF3|starBase_3|26876937|PAR-CLIP;P84103|SRSF3|s41|10094314|SpliceAid-F,P84103|SRSF3|1249|17036044|SpliceAid-F,P84103|SRSF3|1251|17036044|SpliceAid-F,P84103|SRSF3|starBase_1|26876937|PAR-CLIP,P84103|SRSF3|NA|NA|NA;P84103|SRSF3|UGGAC|26876937|PAR-CLIP	5	0.849167
Q3SZR8	ENSBTAG00000040006	SRSF3	novel.circ.002424	706-761	-	23.82	0.38	1	PF00076	1	P84103|SRSF3|s41|10094314|SpliceAid-F,P84103|SRSF3|1249|17036044|SpliceAid-F,P84103|SRSF3|1251|17036044|SpliceAid-F,P84103|SRSF3|starBase_1|26876937|PAR-CLIP,P84103|SRSF3|NA|NA|NA	3	0.849125
Q3ZBJ1	ENSBTAG00000008873	NCBP2	novel.circ.002477	522-573	-	22.61	0.38	1	PF00076	1	P52298|NCBP2|HepG2.NCBP2.3.88|31226278|eCLIP_ENCODE,P52298|NCBP2|K562.NCBP2.4.87|31226278|eCLIP_ENCODE,P52298|NCBP2|HepG2.NCBP2.7.125|31226278|eCLIP_ENCODE;P52298|NCBP2|HepG2.NCBP2.5.83|31226278|eCLIP_ENCODE	2	0.849042
Q3T0Q6	ENSBTAG00000012159	CNBP	novel.circ.002477	522-573	-	22.54	0.37	1	PF00098	7	P62633|CNBP|UGGAGNW|28329689|PAR-CLIP,P62633|CNBP||NA|NA	2	0.848875
Q3SZR8	ENSBTAG00000040006	SRSF3	novel.circ.000720	77-128	-	22.47	0.37	1	PF00076	1	P84103|SRSF3|UGGAC|26876937|PAR-CLIP	2	0.848708
Q0VCU0	ENSBTAG00000018622	PCBP4	novel.circ.001043	12315-12840	-	126.31	0.36	1	PF00013	3	P57723|PCBP4|243|31724725|RBNS_ENCODE,P57723|PCBP4|245|31724725|RBNS_ENCODE	4	0.848333
Q3SZR8	ENSBTAG00000040006	SRSF3	novel.circ.001043	12581-13106	-	126.32	0.36	1	PF00076	1	P84103|SRSF3|UGGAC|26876937|PAR-CLIP;P84103|SRSF3|s41|10094314|SpliceAid-F,P84103|SRSF3|1249|17036044|SpliceAid-F,P84103|SRSF3|1251|17036044|SpliceAid-F,P84103|SRSF3|starBase_1|26876937|PAR-CLIP,P84103|SRSF3|NA|NA|NA;P84103|SRSF3|starBase_2|26876937|PAR-CLIP;P84103|SRSF3|starBase_4|26876937|PAR-CLIP,P84103|SRSF3|s81|10022858|SpliceAid-F,P84103|SRSF3|1245|17036044|SpliceAid-F,P84103|SRSF3|1244|170…	51	0.848333
Q3ZBJ1	ENSBTAG00000008873	NCBP2	novel.circ.002424	706-761	-	23.43	0.36	1	PF00076	1	P52298|NCBP2|HepG2.NCBP2.5.83|31226278|eCLIP_ENCODE	2	0.848208
Q3T127	ENSBTAG00000023610	U2AF1L4	novel.circ.001043	12577-13102	-	126.07	0.35	1	PF00642,PF00076	3	Q01081|U2AF1|K562.U2AF1.1.191|31226278|eCLIP_ENCODE;Q01081|U2AF1|K562.U2AF1.2.166|31226278|eCLIP_ENCODE;Q01081|U2AF1|K562.U2AF1.6.335|31226278|eCLIP_ENCODE,Q01081|U2AF1|HepG2.U2AF1.5.461|31226278|eCLIP_ENCODE;Q01081|U2AF1|HepG2.U2AF1.0.228|31226278|eCLIP_ENCODE,Q01081|U2AF1|K562.U2AF1.4.144|31226278|eCLIP_ENCODE	17	0.848083
Q2T9U1	ENSBTAG00000019085	SRP54	novel.circ.000685	723-800	-	27.93	0.35	1	PF00448,PF02978,PF02881,PF02492	4	P61011|SRP54|456|12244299|PDB	2	0.848
Q3T127	ENSBTAG00000023610	U2AF1L4	novel.circ.003863	865-916	-	23.3	0.35	1	PF00642,PF00076	3	Q01081|U2AF1|K562.U2AF1.1.191|31226278|eCLIP_ENCODE;Q01081|U2AF1|HepG2.U2AF1.0.228|31226278|eCLIP_ENCODE,Q01081|U2AF1|K562.U2AF1.4.144|31226278|eCLIP_ENCODE;Q01081|U2AF1|K562.U2AF1.6.335|31226278|eCLIP_ENCODE,Q01081|U2AF1|HepG2.U2AF1.5.461|31226278|eCLIP_ENCODE	4	0.847917
Q3T0I4	ENSBTAG00000008498	ALYREF	novel.circ.000493	1209-1260	-	23.24	0.35	1	PF00076,PF13865	2	Q86V81|ALYREF|CUUCG|28934468|iCLIP	2	0.847792
Q3ZBG7	ENSBTAG00000012803	SRP19	novel.circ.003284	939-990	-	22.07	0.35	1	PF01922	1	P09132|SRP19|547|20179341|PDB	3	0.84775
F1MJM0	ENSBTAG00000019133	ZNF326	novel.circ.000016	4651-4952	-	76.69	0.34	1	PF04988	1	Q5BKZ1|ZNF326|452|31724725|RBNS_ENCODE;Q5BKZ1|ZNF326|451|31724725|RBNS_ENCODE,Q5BKZ1|ZNF326|449|31724725|RBNS_ENCODE	4	0.847292
A1A4K8	ENSBTAG00000011645	U2AF1	novel.circ.001814	676-727	-	21.86	0.33	1	PF00642,PF00076	3	Q01081|U2AF1|K562.U2AF1.6.335|31226278|eCLIP_ENCODE,Q01081|U2AF1|HepG2.U2AF1.5.461|31226278|eCLIP_ENCODE;Q01081|U2AF1|HepG2.U2AF1.0.228|31226278|eCLIP_ENCODE,Q01081|U2AF1|K562.U2AF1.4.144|31226278|eCLIP_ENCODE	2	0.84725
Q3MHX3	ENSBTAG00000031688	RBM4	novel.circ.002764	26-77	-	18.94	0.33	1	PF00076,PF13893,PF00098	4	Q9BWF3|RBM4|279|31724725|RBNS_ENCODE,Q9BWF3|RBM4|280|31724725|RBNS_ENCODE;Q9BWF3|RBM4|278|31724725|RBNS_ENCODE,Q9BWF3|RBM4|gcgcgss|19561594|RBPMap,Q9BWF3|RBM4|s102|19561594|SpliceAid-F	2	0.847125
Q2T9U1	ENSBTAG00000019085	SRP54	novel.circ.002790	101-152	-	20.02	0.32	1	PF00448,PF02978,PF02881,PF02492	4	P61011|SRP54|456|12244299|PDB	2	0.846708
Q2T9U1	ENSBTAG00000019085	SRP54	novel.circ.002263	714-765	-	19.99	0.32	1	PF00448,PF02978,PF02881,PF02492	4	P61011|SRP54|456|12244299|PDB	2	0.846625
Q2HJ60	ENSBTAG00000005726	HNRNPA2B1	novel.circ.000720	77-128	-	21.58	0.32	1	PF00076	2	P22626|HNRNPA2B1|707|11024030|SpliceAid-F,P22626|HNRNPA2B1|708|16548521|SpliceAid-F,P22626|HNRNPA2B1|705|11024030|SpliceAid-F,P22626|HNRNPA2B1|125|12415010|RBPD	2	0.846583
P67808	ENSBTAG00000017368	YBX1	novel.circ.002477	501-552	-	21.53	0.32	1	PF00313	1	P67809|YBX1|1293|18503770|SpliceAid-F,P67809|YBX1|1321|19273129|AEDB,P67809|YBX1|1290|11447123|SpliceAid-F,P67809|YBX1|1339|11447123|AEDB,P67809|YBX1|1291|11447123|SpliceAid-F;P67809|YBX1|124|15798215|RBPDB	2	0.846458
Q2T9U1	ENSBTAG00000019085	SRP54	novel.circ.000987	281-332	-	22.36	0.31	1	PF00448,PF02978,PF02881,PF02492	4	P61011|SRP54|456|12244299|PDB	2	0.846417
Q3SZR8	ENSBTAG00000040006	SRSF3	novel.circ.003040	742-37	back-splicing_junction	19.9	0.31	1	PF00076	1	P84103|SRSF3|UGGAC|26876937|PAR-CLIP;P84103|SRSF3|s41|10094314|SpliceAid-F,P84103|SRSF3|1249|17036044|SpliceAid-F,P84103|SRSF3|1251|17036044|SpliceAid-F,P84103|SRSF3|starBase_1|26876937|PAR-CLIP,P84103|SRSF3|NA|NA|NA	3	0.846417
Q5E988	ENSBTAG00000015989	RPS5	novel.circ.004264	2773-2942	-	46.69	0.31	1	PF00177	1	P46782|RPS5|HepG2.RPS5.1.119|31226278|eCLIP_ENCODE;P46782|RPS5|K562.RPS5.1.215|31226278|eCLIP_ENCODE	2	0.846167
Q1RMU5	ENSBTAG00000006330	RBM5	novel.circ.002867	1801-2002	-	54.22	0.3	1	PF01585,PF17780,PF00076,PF00641,PF12656	5	P52756|RBM5|1148|18840686|SpliceAid-F,P52756|RBM5|UCAUC|24332178|HITS-CLIP	3	0.846042
Q5E9J1	ENSBTAG00000008853	HNRNPF	novel.circ.001256	155-12	back-splicing_junction	12.56	0.3	1	PF00076,PF08080	3	P52597|HNRNPF|gugkau|22574288|RBPMap,P52597|HNRNPF|815|19506027|SpliceAid-F,P52597|HNRNPF|1331|12612063|AEDB,P52597|HNRNPF|817|12612063|SpliceAid-F,P52597|HNRNPF|836|NA|NA	2	0.845875
Q2T9U1	ENSBTAG00000019085	SRP54	novel.circ.001338	151-202	-	18.4	0.3	1	PF00448,PF02978,PF02881,PF02492	4	P61011|SRP54|456|12244299|PDB	2	0.84575
Q3ZBV2	ENSBTAG00000003570	DDX19A	novel.circ.004264	2773-2942	-	45.83	0.27	1	PF00270,PF00271	2	Q9UMR2|DDX19B|554|19219046|PDB,Q9UMR2|DDX19B|332|19244245|PDB	2	0.844625
Q1RMJ7	ENSBTAG00000010393	TRNAU1AP	novel.circ.000848	851-920	-	25.34	0.26	1	PF17654,PF00076	3	Q9NX07|TRNAU1AP|427|31724725|RBNS_ENCODE,Q9NX07|TRNAU1AP|428|31724725|RBNS_ENCODE	2	0.844375
Q863B3	ENSBTAG00000010692	SND1	novel.circ.000928	3241-3962	-	164.22	0.26	1	PF00565,PF00567	6	Q7KZF4|SND1|HepG2.SND1.4.87|31226278|eCLIP_ENCODE;Q7KZF4|SND1|HepG2.SND1.5.68|31226278|eCLIP_ENCODE;Q7KZF4|SND1|K562.SND1.3.75|31226278|eCLIP_ENCODE,Q7KZF4|SND1|K562.SND1.6.82|31226278|eCLIP_ENCODE;Q7KZF4|SND1|K562.SND1.4.86|31226278|eCLIP_ENCODE	12	0.844375
A1A4K8	ENSBTAG00000011645	U2AF1	novel.circ.001046	75-126	-	16.59	0.26	1	PF00642,PF00076	3	Q01081|U2AF1|K562.U2AF1.6.335|31226278|eCLIP_ENCODE,Q01081|U2AF1|HepG2.U2AF1.5.461|31226278|eCLIP_ENCODE	2	0.844333
P67808	ENSBTAG00000017368	YBX1	novel.circ.003040	742-37	back-splicing_junction	19.03	0.26	1	PF00313	1	P67809|YBX1|1293|18503770|SpliceAid-F,P67809|YBX1|1321|19273129|AEDB,P67809|YBX1|1290|11447123|SpliceAid-F,P67809|YBX1|1339|11447123|AEDB,P67809|YBX1|1291|11447123|SpliceAid-F	2	0.844292
A6QQL9	ENSBTAG00000014353	SRP14	novel.circ.000847	921-974	-	21.73	0.26	1	PF02290	1	P37108|SRP14|445|11089964|PDB,P37108|SRP14|342|11089964|PDB	2	0.84425
Q2T9U1	ENSBTAG00000019085	SRP54	novel.circ.004326	1983-2114	-	36.15	0.26	1	PF00448,PF02978,PF02881,PF02492	4	P61011|SRP54|456|12244299|PDB	4	0.84425
Q3ZBG7	ENSBTAG00000012803	SRP19	novel.circ.003627	576-627	-	20.52	0.26	1	PF01922	1	P09132|SRP19|547|20179341|PDB	3	0.844042
Q3T0I4	ENSBTAG00000008498	ALYREF	novel.circ.000016	4651-4952	-	74.31	0.26	1	PF00076,PF13865	2	Q86V81|ALYREF|CUUCG|28934468|iCLIP	3	0.843958
Q2T9U1	ENSBTAG00000019085	SRP54	novel.circ.002477	347-398	-	20.46	0.25	1	PF00448,PF02978,PF02881,PF02492	4	P61011|SRP54|456|12244299|PDB	2	0.843917
Q3SZR8	ENSBTAG00000040006	SRSF3	novel.circ.004321	673-724	-	18.87	0.25	1	PF00076	1	P84103|SRSF3|s41|10094314|SpliceAid-F,P84103|SRSF3|1249|17036044|SpliceAid-F,P84103|SRSF3|1251|17036044|SpliceAid-F,P84103|SRSF3|starBase_1|26876937|PAR-CLIP,P84103|SRSF3|NA|NA|NA;P84103|SRSF3|UGGAC|26876937|PAR-CLIP	3	0.843917
P67808	ENSBTAG00000017368	YBX1	novel.circ.001209	22-73	-	20.41	0.25	1	PF00313	1	P67809|YBX1|124|15798215|RBPDB;P67809|YBX1|1293|18503770|SpliceAid-F,P67809|YBX1|1321|19273129|AEDB,P67809|YBX1|1290|11447123|SpliceAid-F,P67809|YBX1|1339|11447123|AEDB,P67809|YBX1|1291|11447123|SpliceAid-F	2	0.843792
Q2T9U1	ENSBTAG00000019085	SRP54	novel.circ.003958	401-452	-	21.16	0.25	1	PF00448,PF02978,PF02881,PF02492	4	P61011|SRP54|456|12244299|PDB	2	0.843625
Q5EA53	ENSBTAG00000021016	GTF2F1	novel.circ.003863	315-366	-	21.24	0.24	1	PF05793	1	P35269|GTF2F1|K562.GTF2F1.1.466|31226278|eCLIP_ENCODE,P35269|GTF2F1|HepG2.GTF2F1.1.345|31226278|eCLIP_ENCODE	3	0.843125
Q3ZBG7	ENSBTAG00000012803	SRP19	novel.circ.001068	251-302	-	13.44	0.23	1	PF01922	1	P09132|SRP19|547|20179341|PDB	2	0.843
Q2T9U1	ENSBTAG00000019085	SRP54	novel.circ.003284	651-702	-	20.08	0.23	1	PF00448,PF02978,PF02881,PF02492	4	P61011|SRP54|456|12244299|PDB	3	0.843
Q3SZR8	ENSBTAG00000040006	SRSF3	novel.circ.001209	22-73	-	20.01	0.23	1	PF00076	1	P84103|SRSF3|UGGAC|26876937|PAR-CLIP;P84103|SRSF3|s41|10094314|SpliceAid-F,P84103|SRSF3|1249|17036044|SpliceAid-F,P84103|SRSF3|1251|17036044|SpliceAid-F,P84103|SRSF3|starBase_1|26876937|PAR-CLIP,P84103|SRSF3|NA|NA|NA	3	0.842833
Q2T9U1	ENSBTAG00000019085	SRP54	novel.circ.004321	151-202	-	18.34	0.22	1	PF00448,PF02978,PF02881,PF02492	4	P61011|SRP54|456|12244299|PDB	2	0.842625
Q2T9U1	ENSBTAG00000019085	SRP54	novel.circ.001886	1-52	-	15.92	0.22	1	PF00448,PF02978,PF02881,PF02492	4	P61011|SRP54|456|12244299|PDB	2	0.842583
Q5E9J1	ENSBTAG00000008853	HNRNPF	novel.circ.002263	39-90	-	18.25	0.22	1	PF00076,PF08080	3	P52597|HNRNPF|gugkau|22574288|RBPMap,P52597|HNRNPF|815|19506027|SpliceAid-F,P52597|HNRNPF|1331|12612063|AEDB,P52597|HNRNPF|817|12612063|SpliceAid-F,P52597|HNRNPF|836|NA|NA	2	0.842375
Q3ZBG7	ENSBTAG00000012803	SRP19	novel.circ.002965	824-889	-	23.3	0.22	1	PF01922	1	P09132|SRP19|547|20179341|PDB	4	0.842333
Q3SZR8	ENSBTAG00000040006	SRSF3	novel.circ.003236	151-202	-	13.21	0.22	1	PF00076	1	P84103|SRSF3|s41|10094314|SpliceAid-F,P84103|SRSF3|1249|17036044|SpliceAid-F,P84103|SRSF3|1251|17036044|SpliceAid-F,P84103|SRSF3|starBase_1|26876937|PAR-CLIP,P84103|SRSF3|NA|NA|NA;P84103|SRSF3|UGGAC|26876937|PAR-CLIP	2	0.842333
Q5W9D7	ENSBTAG00000011593	QKI	novel.circ.001229	5854-177	back-splicing_junction	59.53	0.21	1	PF16544,PF16551,PF00013	3	Q96PU8|QKI|83|15273320|RBPDB,Q96PU8|QKI|70|15273320|RBPDB;Q96PU8|QKI|104|15273320|RBPDB	2	0.842208
Q3SZR8	ENSBTAG00000040006	SRSF3	novel.circ.001112	1-52	-	13.06	0.21	1	PF00076	1	P84103|SRSF3|UGGAC|26876937|PAR-CLIP;P84103|SRSF3|s41|10094314|SpliceAid-F,P84103|SRSF3|1249|17036044|SpliceAid-F,P84103|SRSF3|1251|17036044|SpliceAid-F,P84103|SRSF3|starBase_1|26876937|PAR-CLIP,P84103|SRSF3|NA|NA|NA;P84103|SRSF3|starBase_2|26876937|PAR-CLIP	5	0.841917
Q3ZBG7	ENSBTAG00000012803	SRP19	novel.circ.002187	345-396	-	15.64	0.2	1	PF01922	1	P09132|SRP19|547|20179341|PDB	2	0.841875
Q3T0Q6	ENSBTAG00000012159	CNBP	novel.circ.002424	706-761	-	20.59	0.2	1	PF00098	7	P62633|CNBP||NA|NA;P62633|CNBP|UGGAGNW|28329689|PAR-CLIP,P62633|CNBP||NA|NA	2	0.841583
Q3SZR8	ENSBTAG00000040006	SRSF3	novel.circ.000847	921-974	-	20.49	0.19	1	PF00076	1	P84103|SRSF3|UGGAC|26876937|PAR-CLIP;P84103|SRSF3|s41|10094314|SpliceAid-F,P84103|SRSF3|1249|17036044|SpliceAid-F,P84103|SRSF3|1251|17036044|SpliceAid-F,P84103|SRSF3|starBase_1|26876937|PAR-CLIP,P84103|SRSF3|NA|NA|NA	4	0.841333
Q3SZR8	ENSBTAG00000040006	SRSF3	novel.circ.003608	351-402	-	15.34	0.19	1	PF00076	1	P84103|SRSF3|UGGAC|26876937|PAR-CLIP	2	0.841083
Q2T9U1	ENSBTAG00000019085	SRP54	novel.circ.001669	12-63	-	15.32	0.18	1	PF00448,PF02978,PF02881,PF02492	4	P61011|SRP54|456|12244299|PDB	2	0.841042
Q5E9J1	ENSBTAG00000008853	HNRNPF	novel.circ.002477	522-573	-	19.13	0.18	1	PF00076,PF08080	3	P52597|HNRNPF|gugkau|22574288|RBPMap,P52597|HNRNPF|815|19506027|SpliceAid-F,P52597|HNRNPF|1331|12612063|AEDB,P52597|HNRNPF|817|12612063|SpliceAid-F,P52597|HNRNPF|836|NA|NA	2	0.84075
Q1RMJ7	ENSBTAG00000010393	TRNAU1AP	novel.circ.003130	1293-1362	-	23.74	0.17	1	PF17654,PF00076	3	Q9NX07|TRNAU1AP|427|31724725|RBNS_ENCODE,Q9NX07|TRNAU1AP|428|31724725|RBNS_ENCODE	2	0.840583
Q0VCU0	ENSBTAG00000018622	PCBP4	novel.circ.000928	3241-3962	-	159.33	0.17	1	PF00013	3	P57723|PCBP4|244|31724725|RBNS_ENCODE;P57723|PCBP4|243|31724725|RBNS_ENCODE,P57723|PCBP4|245|31724725|RBNS_ENCODE	6	0.840417
Q3SZR8	ENSBTAG00000040006	SRSF3	novel.circ.003130	1293-1362	-	23.68	0.17	1	PF00076	1	P84103|SRSF3|s41|10094314|SpliceAid-F,P84103|SRSF3|1249|17036044|SpliceAid-F,P84103|SRSF3|1251|17036044|SpliceAid-F,P84103|SRSF3|starBase_1|26876937|PAR-CLIP,P84103|SRSF3|NA|NA|NA;P84103|SRSF3|UGGAC|26876937|PAR-CLIP;P84103|SRSF3|starBase_2|26876937|PAR-CLIP	5	0.840417
Q3ZBG7	ENSBTAG00000012803	SRP19	novel.circ.004328	39-90	-	12.51	0.17	1	PF01922	1	P09132|SRP19|547|20179341|PDB	2	0.840375
P67808	ENSBTAG00000017368	YBX1	novel.circ.001043	12581-13106	-	118.32	0.17	1	PF00313	1	P67809|YBX1|124|15798215|RBPDB;P67809|YBX1|1293|18503770|SpliceAid-F,P67809|YBX1|1321|19273129|AEDB,P67809|YBX1|1290|11447123|SpliceAid-F,P67809|YBX1|1339|11447123|AEDB,P67809|YBX1|1291|11447123|SpliceAid-F	5	0.840292
A1A4K8	ENSBTAG00000011645	U2AF1	novel.circ.000987	551-602	-	19.68	0.16	1	PF00642,PF00076	3	Q01081|U2AF1|HepG2.U2AF1.0.228|31226278|eCLIP_ENCODE,Q01081|U2AF1|K562.U2AF1.4.144|31226278|eCLIP_ENCODE	2	0.840167
Q3ZBG7	ENSBTAG00000012803	SRP19	novel.circ.000987	531-582	-	19.63	0.16	1	PF01922	1	P09132|SRP19|547|20179341|PDB	2	0.840083
Q3SZR8	ENSBTAG00000040006	SRSF3	novel.circ.004264	2773-2942	-	43.28	0.16	1	PF00076	1	P84103|SRSF3|UGGAC|26876937|PAR-CLIP;P84103|SRSF3|s41|10094314|SpliceAid-F,P84103|SRSF3|1249|17036044|SpliceAid-F,P84103|SRSF3|1251|17036044|SpliceAid-F,P84103|SRSF3|starBase_1|26876937|PAR-CLIP,P84103|SRSF3|NA|NA|NA;P84103|SRSF3|starBase_6|26876937|PAR-CLIP,P84103|SRSF3|1354|19273129|AEDB,P84103|SRSF3|starBase_3|26876937|PAR-CLIP;P84103|SRSF3|ugcygyy|19296853|RBPMap;P84103|SRSF3|starBase_4|26876…	13	0.84
Q3MHR5	ENSBTAG00000018258	SRSF2	novel.circ.001043	12315-12840	-	117.59	0.15	1	PF00076	1	Q01130|SRSF2|1380|15247216|AEDB,Q01130|SRSF2|502|22002536|PDB,Q01130|SRSF2|1179|12612063|SpliceAid-F,Q01130|SRSF2|1182|9848651|SpliceAid-F,Q01130|SRSF2|1171|16990281|Spli;Q01130|SRSF2|1323|11825891|AEDB,Q01130|SRSF2|s57|10094314|SpliceAid-F;Q01130|SRSF2|1173|19843576|SpliceAid-F,Q01130|SRSF2|1334|11967553|AEDB,Q01130|SRSF2|gryymcyr|19296853|RBPMap;Q01130|SRSF2|s56|10094314|SpliceAid-F,Q01130|SRSF…	14	0.839583
Q5W9D7	ENSBTAG00000011593	QKI	novel.circ.000928	3241-3962	-	158.06	0.15	1	PF16544,PF16551,PF00013	3	Q96PU8|QKI|104|15273320|RBPDB	2	0.839417
Q3T127	ENSBTAG00000023610	U2AF1L4	novel.circ.001814	676-727	-	18.51	0.14	1	PF00642,PF00076	3	Q01081|U2AF1|K562.U2AF1.6.335|31226278|eCLIP_ENCODE,Q01081|U2AF1|HepG2.U2AF1.5.461|31226278|eCLIP_ENCODE;Q01081|U2AF1|HepG2.U2AF1.0.228|31226278|eCLIP_ENCODE,Q01081|U2AF1|K562.U2AF1.4.144|31226278|eCLIP_ENCODE	2	0.839292
Q3SZR8	ENSBTAG00000040006	SRSF3	novel.circ.003111	426-477	-	15.8	0.14	1	PF00076	1	P84103|SRSF3|UGGAC|26876937|PAR-CLIP	2	0.839167
Q3SZR8	ENSBTAG00000040006	SRSF3	novel.circ.003305	651-702	-	17.71	0.14	1	PF00076	1	P84103|SRSF3|UGGAC|26876937|PAR-CLIP;P84103|SRSF3|s41|10094314|SpliceAid-F,P84103|SRSF3|1249|17036044|SpliceAid-F,P84103|SRSF3|1251|17036044|SpliceAid-F,P84103|SRSF3|starBase_1|26876937|PAR-CLIP,P84103|SRSF3|NA|NA|NA	4	0.839
A1A4K8	ENSBTAG00000011645	U2AF1	novel.circ.001043	12577-13102	-	116.98	0.14	1	PF00642,PF00076	3	Q01081|U2AF1|K562.U2AF1.1.191|31226278|eCLIP_ENCODE;Q01081|U2AF1|K562.U2AF1.2.166|31226278|eCLIP_ENCODE;Q01081|U2AF1|K562.U2AF1.6.335|31226278|eCLIP_ENCODE,Q01081|U2AF1|HepG2.U2AF1.5.461|31226278|eCLIP_ENCODE;Q01081|U2AF1|HepG2.U2AF1.0.228|31226278|eCLIP_ENCODE,Q01081|U2AF1|K562.U2AF1.4.144|31226278|eCLIP_ENCODE	17	0.838958
A1A4K8	ENSBTAG00000011645	U2AF1	novel.circ.000493	1209-1260	-	19.47	0.14	1	PF00642,PF00076	3	Q01081|U2AF1|K562.U2AF1.6.335|31226278|eCLIP_ENCODE,Q01081|U2AF1|HepG2.U2AF1.5.461|31226278|eCLIP_ENCODE;Q01081|U2AF1|HepG2.U2AF1.0.228|31226278|eCLIP_ENCODE,Q01081|U2AF1|K562.U2AF1.4.144|31226278|eCLIP_ENCODE;Q01081|U2AF1|K562.U2AF1.1.191|31226278|eCLIP_ENCODE	4	0.838958
Q5EA53	ENSBTAG00000021016	GTF2F1	novel.circ.001229	5736-59	back-splicing_junction	57.36	0.13	1	PF05793	1	P35269|GTF2F1|K562.GTF2F1.1.466|31226278|eCLIP_ENCODE,P35269|GTF2F1|HepG2.GTF2F1.1.345|31226278|eCLIP_ENCODE	11	0.838792
Q3ZBJ1	ENSBTAG00000008873	NCBP2	novel.circ.001267	1-52	-	14.34	0.12	1	PF00076	1	P52298|NCBP2|K562.NCBP2.0.66|31226278|eCLIP_ENCODE	2	0.8385
Q5E9J1	ENSBTAG00000008853	HNRNPF	novel.circ.003040	742-37	back-splicing_junction	16.64	0.12	1	PF00076,PF08080	3	P52597|HNRNPF|gugkau|22574288|RBPMap,P52597|HNRNPF|815|19506027|SpliceAid-F,P52597|HNRNPF|1331|12612063|AEDB,P52597|HNRNPF|817|12612063|SpliceAid-F,P52597|HNRNPF|836|NA|NA;P52597|HNRNPF|gukgykg|22574288|RBPMap	3	0.838458
Q5E9J1	ENSBTAG00000008853	HNRNPF	novel.circ.001482	201-252	-	11.82	0.12	1	PF00076,PF08080	3	P52597|HNRNPF|gugkau|22574288|RBPMap,P52597|HNRNPF|815|19506027|SpliceAid-F,P52597|HNRNPF|1331|12612063|AEDB,P52597|HNRNPF|817|12612063|SpliceAid-F,P52597|HNRNPF|836|NA|NA	3	0.838417
A1A4K8	ENSBTAG00000011645	U2AF1	novel.circ.004326	2406-2537	-	33.31	0.12	1	PF00642,PF00076	3	Q01081|U2AF1|HepG2.U2AF1.0.228|31226278|eCLIP_ENCODE,Q01081|U2AF1|K562.U2AF1.4.144|31226278|eCLIP_ENCODE;Q01081|U2AF1|K562.U2AF1.1.191|31226278|eCLIP_ENCODE	4	0.838208
Q3ZBJ1	ENSBTAG00000008873	NCBP2	novel.circ.004264	2773-2942	-	42.16	0.11	1	PF00076	1	P52298|NCBP2|HepG2.NCBP2.5.83|31226278|eCLIP_ENCODE;P52298|NCBP2|K562.NCBP2.0.66|31226278|eCLIP_ENCODE;P52298|NCBP2|HepG2.NCBP2.3.88|31226278|eCLIP_ENCODE,P52298|NCBP2|K562.NCBP2.4.87|31226278|eCLIP_ENCODE,P52298|NCBP2|HepG2.NCBP2.7.125|31226278|eCLIP_ENCODE	3	0.838
Q3T127	ENSBTAG00000023610	U2AF1L4	novel.circ.001046	75-126	-	14.11	0.11	1	PF00642,PF00076	3	Q01081|U2AF1|K562.U2AF1.6.335|31226278|eCLIP_ENCODE,Q01081|U2AF1|HepG2.U2AF1.5.461|31226278|eCLIP_ENCODE	2	0.837917
Q3SZR8	ENSBTAG00000040006	SRSF3	novel.circ.000848	827-896	-	22.56	0.11	1	PF00076	1	P84103|SRSF3|starBase_4|26876937|PAR-CLIP,P84103|SRSF3|s81|10022858|SpliceAid-F,P84103|SRSF3|1245|17036044|SpliceAid-F,P84103|SRSF3|1244|17036044|SpliceAid-F,P84103|SRSF3|NA|NA|NA;P84103|SRSF3|UGGAC|26876937|PAR-CLIP;P84103|SRSF3|s41|10094314|SpliceAid-F,P84103|SRSF3|1249|17036044|SpliceAid-F,P84103|SRSF3|1251|17036044|SpliceAid-F,P84103|SRSF3|starBase_1|26876937|PAR-CLIP,P84103|SRSF3|NA|NA|NA	5	0.83775
Q5E9J1	ENSBTAG00000008853	HNRNPF	novel.circ.000980	220-271	-	14.03	0.1	1	PF00076,PF08080	3	P52597|HNRNPF|gugkau|22574288|RBPMap,P52597|HNRNPF|815|19506027|SpliceAid-F,P52597|HNRNPF|1331|12612063|AEDB,P52597|HNRNPF|817|12612063|SpliceAid-F,P52597|HNRNPF|836|NA|NA	2	0.837708
Q3T0Q6	ENSBTAG00000012159	CNBP	novel.circ.000866	255-306	-	11.57	0.1	1	PF00098	7	P62633|CNBP|UGGAGNW|28329689|PAR-CLIP,P62633|CNBP||NA|NA;P62633|CNBP||NA|NA	2	0.837708
Q9XSJ0	ENSBTAG00000013620	UCHL5	novel.circ.004326	1983-2114	-	33.05	0.1	1	PF01088,PF18031	2	Q9Y5K5|UCHL5|K562.UCHL5.6.175|31226278|eCLIP_ENCODE	3	0.837667
Q3T0Q6	ENSBTAG00000012159	CNBP	novel.circ.003111	176-227	-	15.12	0.1	1	PF00098	7	P62633|CNBP||NA|NA	2	0.837417
Q3SZR8	ENSBTAG00000040006	SRSF3	novel.circ.002533	219-270	-	11.39	0.09	1	PF00076	1	P84103|SRSF3|UGGAC|26876937|PAR-CLIP	3	0.837167
Q2T9U1	ENSBTAG00000019085	SRP54	novel.circ.001300	397-486	-	25.73	0.09	1	PF00448,PF02978,PF02881,PF02492	4	P61011|SRP54|456|12244299|PDB	2	0.837125
Q1JQD2	ENSBTAG00000000080	GRWD1	novel.circ.004264	2773-2942	-	41.57	0.09	1	PF00400,PF12265	3	Q9BQ67|GRWD1|HepG2.GRWD1.8.169|31226278|eCLIP_ENCODE;Q9BQ67|GRWD1|HepG2.GRWD1.6.332|31226278|eCLIP_ENCODE,Q9BQ67|GRWD1|HepG2.GRWD1.2.313|31226278|eCLIP_ENCODE	2	0.836917
A1A4K8	ENSBTAG00000011645	U2AF1	novel.circ.001900	477-534	-	20.12	0.09	1	PF00642,PF00076	3	Q01081|U2AF1|HepG2.U2AF1.0.228|31226278|eCLIP_ENCODE,Q01081|U2AF1|K562.U2AF1.4.144|31226278|eCLIP_ENCODE;Q01081|U2AF1|K562.U2AF1.6.335|31226278|eCLIP_ENCODE,Q01081|U2AF1|HepG2.U2AF1.5.461|31226278|eCLIP_ENCODE	2	0.836917
Q5E9J1	ENSBTAG00000008853	HNRNPF	novel.circ.002584	176-227	-	16.83	0.08	1	PF00076,PF08080	3	P52597|HNRNPF|gugkau|22574288|RBPMap,P52597|HNRNPF|815|19506027|SpliceAid-F,P52597|HNRNPF|1331|12612063|AEDB,P52597|HNRNPF|817|12612063|SpliceAid-F,P52597|HNRNPF|836|NA|NA	2	0.836875
Q9XSJ0	ENSBTAG00000013620	UCHL5	novel.circ.000928	3241-3962	-	154.9	0.08	1	PF01088,PF18031	2	Q9Y5K5|UCHL5|HepG2.UCHL5.4.200|31226278|eCLIP_ENCODE;Q9Y5K5|UCHL5|K562.UCHL5.6.175|31226278|eCLIP_ENCODE	12	0.836875
Q0VCZ3	ENSBTAG00000015771	YTHDF2	novel.circ.003307	126-177	-	11.25	0.08	1	PF04146	1	Q9Y5A9|YTHDF2|DRACH|27602518|iCLIP	2	0.836792
Q3ZBJ1	ENSBTAG00000008873	NCBP2	novel.circ.000227	171-240	-	22.09	0.08	1	PF00076	1	P52298|NCBP2|HepG2.NCBP2.3.88|31226278|eCLIP_ENCODE,P52298|NCBP2|K562.NCBP2.4.87|31226278|eCLIP_ENCODE,P52298|NCBP2|HepG2.NCBP2.7.125|31226278|eCLIP_ENCODE	2	0.836667
Q2T9U1	ENSBTAG00000019085	SRP54	novel.circ.001229	5736-59	back-splicing_junction	56.01	0.08	1	PF00448,PF02978,PF02881,PF02492	4	P61011|SRP54|456|12244299|PDB	6	0.836667
Q3MHX3	ENSBTAG00000031688	RBM4	novel.circ.001043	12581-13106	-	114.51	0.08	1	PF00076,PF13893,PF00098	4	Q9BWF3|RBM4|1146|16260624|SpliceAid-F,Q9BWF3|RBM4|1145|16777844|SpliceAid-F,Q9BWF3|RBM4|1147|21518792|SpliceAid-F;Q9BWF3|RBM4|278|31724725|RBNS_ENCODE,Q9BWF3|RBM4|gcgcgss|19561594|RBPMap,Q9BWF3|RBM4|s102|19561594|SpliceAid-F	16	0.8365
Q3T0Q6	ENSBTAG00000012159	CNBP	novel.circ.002533	219-270	-	11.14	0.08	1	PF00098	7	P62633|CNBP|UGGAGNW|28329689|PAR-CLIP,P62633|CNBP||NA|NA	2	0.836458
Q3SZR8	ENSBTAG00000040006	SRSF3	novel.circ.000227	171-240	-	21.99	0.07	1	PF00076	1	P84103|SRSF3|s41|10094314|SpliceAid-F,P84103|SRSF3|1249|17036044|SpliceAid-F,P84103|SRSF3|1251|17036044|SpliceAid-F,P84103|SRSF3|starBase_1|26876937|PAR-CLIP,P84103|SRSF3|NA|NA|NA;P84103|SRSF3|starBase_6|26876937|PAR-CLIP,P84103|SRSF3|1354|19273129|AEDB,P84103|SRSF3|starBase_3|26876937|PAR-CLIP	4	0.836417
Q3SZR8	ENSBTAG00000040006	SRSF3	novel.circ.003400	340-391	-	14.7	0.07	1	PF00076	1	P84103|SRSF3|s41|10094314|SpliceAid-F,P84103|SRSF3|1249|17036044|SpliceAid-F,P84103|SRSF3|1251|17036044|SpliceAid-F,P84103|SRSF3|starBase_1|26876937|PAR-CLIP,P84103|SRSF3|NA|NA|NA;P84103|SRSF3|UGGAC|26876937|PAR-CLIP	2	0.836375
Q3ZBJ1	ENSBTAG00000008873	NCBP2	novel.circ.002764	26-77	-	14.62	0.07	1	PF00076	1	P52298|NCBP2|HepG2.NCBP2.5.83|31226278|eCLIP_ENCODE;P52298|NCBP2|K562.NCBP2.0.66|31226278|eCLIP_ENCODE	3	0.836167
Q2T9U1	ENSBTAG00000019085	SRP54	novel.circ.003595	86-137	-	14.58	0.07	1	PF00448,PF02978,PF02881,PF02492	4	P61011|SRP54|456|12244299|PDB	2	0.836083
Q3T127	ENSBTAG00000023610	U2AF1L4	novel.circ.004326	2016-2147	-	32.02	0.05	1	PF00642,PF00076	3	Q01081|U2AF1|HepG2.U2AF1.0.228|31226278|eCLIP_ENCODE,Q01081|U2AF1|K562.U2AF1.4.144|31226278|eCLIP_ENCODE;Q01081|U2AF1|K562.U2AF1.1.191|31226278|eCLIP_ENCODE	4	0.8355
Q1RMU5	ENSBTAG00000006330	RBM5	novel.circ.000016	6001-6302	-	68.1	0.05	1	PF01585,PF17780,PF00076,PF00641,PF12656	5	P52756|RBM5|1148|18840686|SpliceAid-F,P52756|RBM5|UCAUC|24332178|HITS-CLIP	2	0.835292
Q3SZR8	ENSBTAG00000040006	SRSF3	novel.circ.004320	1081-1142	-	19.32	0.04	1	PF00076	1	P84103|SRSF3|s41|10094314|SpliceAid-F,P84103|SRSF3|1249|17036044|SpliceAid-F,P84103|SRSF3|1251|17036044|SpliceAid-F,P84103|SRSF3|starBase_1|26876937|PAR-CLIP,P84103|SRSF3|NA|NA|NA;P84103|SRSF3|starBase_6|26876937|PAR-CLIP,P84103|SRSF3|1354|19273129|AEDB,P84103|SRSF3|starBase_3|26876937|PAR-CLIP	2	0.835083
Q3SZR8	ENSBTAG00000040006	SRSF3	novel.circ.003156	576-627	-	15.19	0.04	1	PF00076	1	P84103|SRSF3|UGGAC|26876937|PAR-CLIP;P84103|SRSF3|s41|10094314|SpliceAid-F,P84103|SRSF3|1249|17036044|SpliceAid-F,P84103|SRSF3|1251|17036044|SpliceAid-F,P84103|SRSF3|starBase_1|26876937|PAR-CLIP,P84103|SRSF3|NA|NA|NA	4	0.834917
Q2KIR1	ENSBTAG00000009077	SNRPA	novel.circ.002584	176-227	-	15.98	0.04	1	PF00076	2	P09012|SNRPA|M348_0.6|10094314|cisBP-RNA,P09012|SNRPA|M347_0.6|10094314|cisBP-RNA	3	0.834792
Q5E9J1	ENSBTAG00000008853	HNRNPF	novel.circ.004264	2773-2942	-	40.36	0.03	1	PF00076,PF08080	3	P52597|HNRNPF|gugkau|22574288|RBPMap,P52597|HNRNPF|815|19506027|SpliceAid-F,P52597|HNRNPF|1331|12612063|AEDB,P52597|HNRNPF|817|12612063|SpliceAid-F,P52597|HNRNPF|836|NA|NA;P52597|HNRNPF|gukgykg|22574288|RBPMap	9	0.83475
Q5E9J1	ENSBTAG00000008853	HNRNPF	novel.circ.002424	706-761	-	17.54	0.03	1	PF00076,PF08080	3	P52597|HNRNPF|gugkau|22574288|RBPMap,P52597|HNRNPF|815|19506027|SpliceAid-F,P52597|HNRNPF|1331|12612063|AEDB,P52597|HNRNPF|817|12612063|SpliceAid-F,P52597|HNRNPF|836|NA|NA	7	0.834458
Q5EA53	ENSBTAG00000021016	GTF2F1	novel.circ.000928	3241-3962	-	151.9	0.03	1	PF05793	1	P35269|GTF2F1|K562.GTF2F1.1.466|31226278|eCLIP_ENCODE,P35269|GTF2F1|HepG2.GTF2F1.1.345|31226278|eCLIP_ENCODE	18	0.834458
Q5E9J1	ENSBTAG00000008853	HNRNPF	novel.circ.000016	1501-1802	-	67.42	0.02	1	PF00076,PF08080	3	P52597|HNRNPF|gugkau|22574288|RBPMap,P52597|HNRNPF|815|19506027|SpliceAid-F,P52597|HNRNPF|1331|12612063|AEDB,P52597|HNRNPF|817|12612063|SpliceAid-F,P52597|HNRNPF|836|NA|NA	14	0.834333
F1MJM0	ENSBTAG00000019133	ZNF326	novel.circ.003608	353-404	-	12.71	0.02	1	PF04988	1	Q5BKZ1|ZNF326|452|31724725|RBNS_ENCODE;Q5BKZ1|ZNF326|451|31724725|RBNS_ENCODE,Q5BKZ1|ZNF326|449|31724725|RBNS_ENCODE	2	0.834292
Q3MHX3	ENSBTAG00000031688	RBM4	novel.circ.004338	59-110	-	12.64	0.02	1	PF00076,PF13893,PF00098	4	Q9BWF3|RBM4|1146|16260624|SpliceAid-F,Q9BWF3|RBM4|1145|16777844|SpliceAid-F,Q9BWF3|RBM4|1147|21518792|SpliceAid-F	2	0.834083
Q3T127	ENSBTAG00000023610	U2AF1L4	novel.circ.000493	1209-1260	-	17.36	0.02	1	PF00642,PF00076	3	Q01081|U2AF1|K562.U2AF1.6.335|31226278|eCLIP_ENCODE,Q01081|U2AF1|HepG2.U2AF1.5.461|31226278|eCLIP_ENCODE;Q01081|U2AF1|HepG2.U2AF1.0.228|31226278|eCLIP_ENCODE,Q01081|U2AF1|K562.U2AF1.4.144|31226278|eCLIP_ENCODE;Q01081|U2AF1|K562.U2AF1.1.191|31226278|eCLIP_ENCODE	4	0.834042
Q2KIV0	ENSBTAG00000051118	NOL12	novel.circ.000928	3241-3962	-	151.39	0.02	1	PF09805	1	Q9UGY1|NOL12|HepG2.NOL12.9.52|31226278|eCLIP_ENCODE;Q9UGY1|NOL12|HepG2.NOL12.2.48|31226278|eCLIP_ENCODE	9	0.834042
Q2T9U1	ENSBTAG00000019085	SRP54	novel.circ.002424	949-1004	-	17.35	0.02	1	PF00448,PF02978,PF02881,PF02492	4	P61011|SRP54|456|12244299|PDB	3	0.834
Q3T127	ENSBTAG00000023610	U2AF1L4	novel.circ.000987	531-582	-	17.02	0.02	1	PF00642,PF00076	3	Q01081|U2AF1|HepG2.U2AF1.0.228|31226278|eCLIP_ENCODE,Q01081|U2AF1|K562.U2AF1.4.144|31226278|eCLIP_ENCODE	2	0.834
Q0IIG6	ENSBTAG00000000435	TARBP2	novel.circ.004264	2689-2858	-	39.87	0.01	1	PF00035	2	Q15633|TARBP2|starBase_2|25043050|HITS-CLIP,Q15633|TARBP2|starBase_6|25043050|HITS-CLIP,Q15633|TARBP2|starBase_3|25043050|HITS-CLIP;Q15633|TARBP2|starBase_1|25043050|HITS-CLIP,Q15633|TARBP2|starBase_4|25043050|HITS-CLIP	3	0.833875
Q0VCU0	ENSBTAG00000018622	PCBP4	novel.circ.002715	526-577	-	14.74	0.01	1	PF00013	3	P57723|PCBP4|244|31724725|RBNS_ENCODE	2	0.833833
Q3ZBG7	ENSBTAG00000012803	SRP19	novel.circ.003595	401-452	-	13.57	0	1	PF01922	1	P09132|SRP19|547|20179341|PDB	2	0.8335
Q2HJ60	ENSBTAG00000005726	HNRNPA2B1	novel.circ.000227	171-240	-	20.74	0	1	PF00076	2	P22626|HNRNPA2B1|707|11024030|SpliceAid-F,P22626|HNRNPA2B1|708|16548521|SpliceAid-F,P22626|HNRNPA2B1|705|11024030|SpliceAid-F,P22626|HNRNPA2B1|125|12415010|RBPD	3	0.833458
Q0V898	ENSBTAG00000007453	NELFE	novel.circ.001229	5854-177	back-splicing_junction	53.94	0	1	PF00076	1	P18615|NELFE|21|18303858|RBPDB	2	0.833417
A1A4K8	ENSBTAG00000011645	U2AF1	novel.circ.000201	551-602	-	15.39	0	1	PF00642,PF00076	3	Q01081|U2AF1|K562.U2AF1.6.335|31226278|eCLIP_ENCODE,Q01081|U2AF1|HepG2.U2AF1.5.461|31226278|eCLIP_ENCODE;Q01081|U2AF1|HepG2.U2AF1.0.228|31226278|eCLIP_ENCODE,Q01081|U2AF1|K562.U2AF1.4.144|31226278|eCLIP_ENCODE	2	0.833375
Q28141	ENSBTAG00000019821	DHX9	novel.circ.000493	1109-1160	-	109.64	5.2	1	PF00035,PF00271,PF04408,PF07717,PF00270	6	Q08211|DHX9|435|23361462|PDB	1	0.833333
Q28141	ENSBTAG00000019821	DHX9	novel.circ.002764	178-229	-	87.06	4.47	1	PF00035,PF00271,PF04408,PF07717,PF00270	6	Q08211|DHX9|435|23361462|PDB	1	0.833333
Q863B3	ENSBTAG00000010692	SND1	novel.circ.003863	315-366	-	118.86	5.71	1	PF00565,PF00567	6	Q7KZF4|SND1|HepG2.SND1.4.87|31226278|eCLIP_ENCODE	1	0.833333
Q863B3	ENSBTAG00000010692	SND1	novel.circ.001549	1250-1307	-	102.28	4.58	1	PF00565,PF00567	6	Q7KZF4|SND1|K562.SND1.2.81|31226278|eCLIP_ENCODE,Q7KZF4|SND1|HepG2.SND1.0.91|31226278|eCLIP_ENCODE	1	0.833333
Q863B3	ENSBTAG00000010692	SND1	novel.circ.002840	222-273	-	92.19	5.6	1	PF00565,PF00567	6	Q7KZF4|SND1|K562.SND1.3.75|31226278|eCLIP_ENCODE,Q7KZF4|SND1|K562.SND1.6.82|31226278|eCLIP_ENCODE	1	0.833333
Q863B3	ENSBTAG00000010692	SND1	novel.circ.001459	326-377	-	89.98	4.65	1	PF00565,PF00567	6	Q7KZF4|SND1|K562.SND1.3.75|31226278|eCLIP_ENCODE,Q7KZF4|SND1|K562.SND1.6.82|31226278|eCLIP_ENCODE	1	0.833333
Q863B3	ENSBTAG00000010692	SND1	novel.circ.001945	151-202	-	89.02	4.02	1	PF00565,PF00567	6	Q7KZF4|SND1|HepG2.SND1.5.68|31226278|eCLIP_ENCODE	1	0.833333
Q863B3	ENSBTAG00000010692	SND1	novel.circ.002217	151-202	-	80.54	4.8	1	PF00565,PF00567	6	Q7KZF4|SND1|K562.SND1.4.86|31226278|eCLIP_ENCODE	1	0.833333
Q863B3	ENSBTAG00000010692	SND1	novel.circ.000246	101-152	-	76.95	4.02	1	PF00565,PF00567	6	Q7KZF4|SND1|K562.SND1.3.75|31226278|eCLIP_ENCODE,Q7KZF4|SND1|K562.SND1.6.82|31226278|eCLIP_ENCODE	1	0.833333
Q863B3	ENSBTAG00000010692	SND1	novel.circ.002631	211-262	-	70.3	4.11	1	PF00565,PF00567	6	Q7KZF4|SND1|K562.SND1.3.75|31226278|eCLIP_ENCODE,Q7KZF4|SND1|K562.SND1.6.82|31226278|eCLIP_ENCODE	1	0.833333
Q3ZBG7	ENSBTAG00000012803	SRP19	novel.circ.000685	310-387	-	21.75	0	1	PF01922	1	P09132|SRP19|547|20179341|PDB	2	0.833167
Q3T127	ENSBTAG00000023610	U2AF1L4	novel.circ.001900	477-534	-	18.48	0	1	PF00642,PF00076	3	Q01081|U2AF1|HepG2.U2AF1.0.228|31226278|eCLIP_ENCODE,Q01081|U2AF1|K562.U2AF1.4.144|31226278|eCLIP_ENCODE;Q01081|U2AF1|K562.U2AF1.6.335|31226278|eCLIP_ENCODE,Q01081|U2AF1|HepG2.U2AF1.5.461|31226278|eCLIP_ENCODE	2	0.833167
Q2T9U1	ENSBTAG00000019085	SRP54	novel.circ.003752	1275-1472	-	49.35	-0.01	1	PF00448,PF02978,PF02881,PF02492	4	P61011|SRP54|456|12244299|PDB	3	0.833
Q3T0I4	ENSBTAG00000008498	ALYREF	novel.circ.001549	309-366	-	18.35	-0.01	1	PF00076,PF13865	2	Q86V81|ALYREF|CUUCG|28934468|iCLIP	2	0.832875
Q3T0Q6	ENSBTAG00000012159	CNBP	novel.circ.003400	340-391	-	13.31	-0.01	1	PF00098	7	P62633|CNBP|UGGAGNW|28329689|PAR-CLIP,P62633|CNBP||NA|NA;P62633|CNBP||NA|NA	3	0.832833
Q5E9J1	ENSBTAG00000008853	HNRNPF	novel.circ.000847	921-974	-	16.74	-0.02	1	PF00076,PF08080	3	P52597|HNRNPF|gugkau|22574288|RBPMap,P52597|HNRNPF|815|19506027|SpliceAid-F,P52597|HNRNPF|1331|12612063|AEDB,P52597|HNRNPF|817|12612063|SpliceAid-F,P52597|HNRNPF|836|NA|NA	4	0.832583
Q1RMJ7	ENSBTAG00000010393	TRNAU1AP	novel.circ.001043	12315-12840	-	110.61	-0.02	1	PF17654,PF00076	3	Q9NX07|TRNAU1AP|427|31724725|RBNS_ENCODE,Q9NX07|TRNAU1AP|428|31724725|RBNS_ENCODE	6	0.832583
Q3SZR8	ENSBTAG00000040006	SRSF3	novel.circ.002440	26-77	-	11.98	-0.02	1	PF00076	1	P84103|SRSF3|UGGAC|26876937|PAR-CLIP;P84103|SRSF3|starBase_4|26876937|PAR-CLIP,P84103|SRSF3|s81|10022858|SpliceAid-F,P84103|SRSF3|1245|17036044|SpliceAid-F,P84103|SRSF3|1244|17036044|SpliceAid-F,P84103|SRSF3|NA|NA|NA	3	0.832375
Q3T0Q6	ENSBTAG00000012159	CNBP	novel.circ.000848	851-920	-	19.96	-0.04	1	PF00098	7	P62633|CNBP|UGGAGNW|28329689|PAR-CLIP,P62633|CNBP||NA|NA;P62633|CNBP||NA|NA	2	0.831583
A6QR44	ENSBTAG00000019869	DGCR8	novel.circ.002834	4449-5006	-	116.07	-0.04	1	PF00035	2	Q8WYQ5|DGCR8|K562.DGCR8.1.60|31226278|eCLIP_ENCODE	2	0.831542
Q3SZR8	ENSBTAG00000040006	SRSF3	novel.circ.003284	939-990	-	15.18	-0.05	1	PF00076	1	P84103|SRSF3|s41|10094314|SpliceAid-F,P84103|SRSF3|1249|17036044|SpliceAid-F,P84103|SRSF3|1251|17036044|SpliceAid-F,P84103|SRSF3|starBase_1|26876937|PAR-CLIP,P84103|SRSF3|NA|NA|NA;P84103|SRSF3|UGGAC|26876937|PAR-CLIP	3	0.831375
Q3ZBG7	ENSBTAG00000012803	SRP19	novel.circ.000201	529-580	-	14.46	-0.05	1	PF01922	1	P09132|SRP19|547|20179341|PDB	3	0.831125
Q1JQD2	ENSBTAG00000000080	GRWD1	novel.circ.003156	576-627	-	13.6	-0.06	1	PF00400,PF12265	3	Q9BQ67|GRWD1|HepG2.GRWD1.8.169|31226278|eCLIP_ENCODE	2	0.831042
Q5E9J1	ENSBTAG00000008853	HNRNPF	novel.circ.003305	651-702	-	14.39	-0.06	1	PF00076,PF08080	3	P52597|HNRNPF|gugkau|22574288|RBPMap,P52597|HNRNPF|815|19506027|SpliceAid-F,P52597|HNRNPF|1331|12612063|AEDB,P52597|HNRNPF|817|12612063|SpliceAid-F,P52597|HNRNPF|836|NA|NA;P52597|HNRNPF|gukgykg|22574288|RBPMap	6	0.830958
Q863B3	ENSBTAG00000010692	SND1	novel.circ.001243	26-77	-	81.81	3.94	1	PF00565,PF00567	6	Q7KZF4|SND1|K562.SND1.2.81|31226278|eCLIP_ENCODE,Q7KZF4|SND1|HepG2.SND1.0.91|31226278|eCLIP_ENCODE	1	0.83075
Q3ZBG7	ENSBTAG00000012803	SRP19	novel.circ.001049	457-508	-	12.45	-0.06	1	PF01922	1	P09132|SRP19|547|20179341|PDB	2	0.830667
Q3ZBG7	ENSBTAG00000012803	SRP19	novel.circ.001886	190-241	-	11.16	-0.07	1	PF01922	1	P09132|SRP19|547|20179341|PDB	2	0.83025
Q0VCZ3	ENSBTAG00000015771	YTHDF2	novel.circ.002715	542-593	-	13.17	-0.08	1	PF04146	1	Q9Y5A9|YTHDF2|DRACH|27602518|iCLIP	4	0.83
Q3ZBG7	ENSBTAG00000012803	SRP19	novel.circ.000493	1184-1235	-	15.6	-0.08	1	PF01922	1	P09132|SRP19|547|20179341|PDB	2	0.829917
Q9XSJ0	ENSBTAG00000013620	UCHL5	novel.circ.000232	63-114	-	8.83	-0.08	1	PF01088,PF18031	2	Q9Y5K5|UCHL5|K562.UCHL5.6.175|31226278|eCLIP_ENCODE	2	0.829917
Q3T127	ENSBTAG00000023610	U2AF1L4	novel.circ.000201	179-230	-	13.9	-0.09	1	PF00642,PF00076	3	Q01081|U2AF1|K562.U2AF1.6.335|31226278|eCLIP_ENCODE,Q01081|U2AF1|HepG2.U2AF1.5.461|31226278|eCLIP_ENCODE;Q01081|U2AF1|HepG2.U2AF1.0.228|31226278|eCLIP_ENCODE,Q01081|U2AF1|K562.U2AF1.4.144|31226278|eCLIP_ENCODE	2	0.82975
Q3SZR8	ENSBTAG00000040006	SRSF3	novel.circ.002965	824-889	-	17.82	-0.09	1	PF00076	1	P84103|SRSF3|UGGAC|26876937|PAR-CLIP;P84103|SRSF3|s41|10094314|SpliceAid-F,P84103|SRSF3|1249|17036044|SpliceAid-F,P84103|SRSF3|1251|17036044|SpliceAid-F,P84103|SRSF3|starBase_1|26876937|PAR-CLIP,P84103|SRSF3|NA|NA|NA	14	0.829542
Q8WN55	ENSBTAG00000045828	PTBP1	novel.circ.001043	12319-12844	-	107.5	-0.09	1	PF13893,PF00076,PF11835	7	P26599|PTBP1|143|16179478|RBPDB;P26599|PTBP1|996|17548433|SpliceAid-F,P26599|PTBP1|1368|9858533|AEDB,P26599|PTBP1|995|9858533|SpliceAid-F,P26599|PTBP1|s100|19561594|SpliceAid-F,P26599|PTBP1|M227_0.6|238|NA;P26599|PTBP1|1314|9826658|AEDB;P26599|PTBP1|993|16431980|SpliceAid-F;P26599|PTBP1|994|16431980|SpliceAid-F,P26599|PTBP1|1002|16260624|SpliceAid-F	118	0.829417
Q3SZR8	ENSBTAG00000040006	SRSF3	novel.circ.002187	345-396	-	10.8	-0.1	1	PF00076	1	P84103|SRSF3|s41|10094314|SpliceAid-F,P84103|SRSF3|1249|17036044|SpliceAid-F,P84103|SRSF3|1251|17036044|SpliceAid-F,P84103|SRSF3|starBase_1|26876937|PAR-CLIP,P84103|SRSF3|NA|NA|NA	2	0.829333
A1A4K8	ENSBTAG00000011645	U2AF1	novel.circ.001245	301-352	-	14.89	-0.1	1	PF00642,PF00076	3	Q01081|U2AF1|HepG2.U2AF1.0.228|31226278|eCLIP_ENCODE,Q01081|U2AF1|K562.U2AF1.4.144|31226278|eCLIP_ENCODE;Q01081|U2AF1|K562.U2AF1.2.166|31226278|eCLIP_ENCODE	2	0.829083
Q3SZR8	ENSBTAG00000040006	SRSF3	novel.circ.003024	77-128	-	11.81	-0.1	1	PF00076	1	P84103|SRSF3|s41|10094314|SpliceAid-F,P84103|SRSF3|1249|17036044|SpliceAid-F,P84103|SRSF3|1251|17036044|SpliceAid-F,P84103|SRSF3|starBase_1|26876937|PAR-CLIP,P84103|SRSF3|NA|NA|NA;P84103|SRSF3|starBase_4|26876937|PAR-CLIP,P84103|SRSF3|s81|10022858|SpliceAid-F,P84103|SRSF3|1245|17036044|SpliceAid-F,P84103|SRSF3|1244|17036044|SpliceAid-F,P84103|SRSF3|NA|NA|NA	2	0.829042
Q5E9J1	ENSBTAG00000008853	HNRNPF	novel.circ.000246	293-344	-	10.67	-0.1	1	PF00076,PF08080	3	P52597|HNRNPF|gukgykg|22574288|RBPMap;P52597|HNRNPF|gugkau|22574288|RBPMap,P52597|HNRNPF|815|19506027|SpliceAid-F,P52597|HNRNPF|1331|12612063|AEDB,P52597|HNRNPF|817|12612063|SpliceAid-F,P52597|HNRNPF|836|NA|NA	2	0.829
Q3SZR8	ENSBTAG00000040006	SRSF3	novel.circ.001945	1051-1102	-	14.86	-0.1	1	PF00076	1	P84103|SRSF3|s41|10094314|SpliceAid-F,P84103|SRSF3|1249|17036044|SpliceAid-F,P84103|SRSF3|1251|17036044|SpliceAid-F,P84103|SRSF3|starBase_1|26876937|PAR-CLIP,P84103|SRSF3|NA|NA|NA;P84103|SRSF3|UGGAC|26876937|PAR-CLIP	4	0.829
Q3SZR8	ENSBTAG00000040006	SRSF3	novel.circ.000987	531-582	-	14.85	-0.1	1	PF00076	1	P84103|SRSF3|s41|10094314|SpliceAid-F,P84103|SRSF3|1249|17036044|SpliceAid-F,P84103|SRSF3|1251|17036044|SpliceAid-F,P84103|SRSF3|starBase_1|26876937|PAR-CLIP,P84103|SRSF3|NA|NA|NA;P84103|SRSF3|UGGAC|26876937|PAR-CLIP	2	0.829
Q3T0Q6	ENSBTAG00000012159	CNBP	novel.circ.000227	917-986	-	18.83	-0.11	1	PF00098	7	P62633|CNBP||NA|NA	2	0.828917
Q3SZR8	ENSBTAG00000040006	SRSF3	novel.circ.003262	1-52	-	10.61	-0.11	1	PF00076	1	P84103|SRSF3|s41|10094314|SpliceAid-F,P84103|SRSF3|1249|17036044|SpliceAid-F,P84103|SRSF3|1251|17036044|SpliceAid-F,P84103|SRSF3|starBase_1|26876937|PAR-CLIP,P84103|SRSF3|NA|NA|NA;P84103|SRSF3|UGGAC|26876937|PAR-CLIP	2	0.828833
P67808	ENSBTAG00000017368	YBX1	novel.circ.000016	4801-5102	-	63.39	-0.11	1	PF00313	1	P67809|YBX1|124|15798215|RBPDB;P67809|YBX1|1293|18503770|SpliceAid-F,P67809|YBX1|1321|19273129|AEDB,P67809|YBX1|1290|11447123|SpliceAid-F,P67809|YBX1|1339|11447123|AEDB,P67809|YBX1|1291|11447123|SpliceAid-F	2	0.828708
F1MJM0	ENSBTAG00000019133	ZNF326	novel.circ.001209	22-73	-	14.05	-0.11	1	PF04988	1	Q5BKZ1|ZNF326|450|31724725|RBNS_ENCODE;Q5BKZ1|ZNF326|451|31724725|RBNS_ENCODE,Q5BKZ1|ZNF326|449|31724725|RBNS_ENCODE	3	0.828708
Q3ZBG7	ENSBTAG00000012803	SRP19	novel.circ.003958	996-1047	-	14.72	-0.11	1	PF01922	1	P09132|SRP19|547|20179341|PDB	2	0.828667
Q3SZR8	ENSBTAG00000040006	SRSF3	novel.circ.003627	576-627	-	14.04	-0.11	1	PF00076	1	P84103|SRSF3|UGGAC|26876937|PAR-CLIP;P84103|SRSF3|s41|10094314|SpliceAid-F,P84103|SRSF3|1249|17036044|SpliceAid-F,P84103|SRSF3|1251|17036044|SpliceAid-F,P84103|SRSF3|starBase_1|26876937|PAR-CLIP,P84103|SRSF3|NA|NA|NA	5	0.828667
Q3SZR8	ENSBTAG00000040006	SRSF3	novel.circ.003401	217-268	-	8.32	-0.12	1	PF00076	1	P84103|SRSF3|s41|10094314|SpliceAid-F,P84103|SRSF3|1249|17036044|SpliceAid-F,P84103|SRSF3|1251|17036044|SpliceAid-F,P84103|SRSF3|starBase_1|26876937|PAR-CLIP,P84103|SRSF3|NA|NA|NA;P84103|SRSF3|UGGAC|26876937|PAR-CLIP	2	0.828458
F1MJM0	ENSBTAG00000019133	ZNF326	novel.circ.000246	293-344	-	10.39	-0.12	1	PF04988	1	Q5BKZ1|ZNF326|451|31724725|RBNS_ENCODE,Q5BKZ1|ZNF326|449|31724725|RBNS_ENCODE	2	0.82825
Q3T127	ENSBTAG00000023610	U2AF1L4	novel.circ.001245	301-352	-	14.52	-0.12	1	PF00642,PF00076	3	Q01081|U2AF1|HepG2.U2AF1.0.228|31226278|eCLIP_ENCODE,Q01081|U2AF1|K562.U2AF1.4.144|31226278|eCLIP_ENCODE;Q01081|U2AF1|K562.U2AF1.2.166|31226278|eCLIP_ENCODE	2	0.828208
Q3T0Q6	ENSBTAG00000012159	CNBP	novel.circ.004264	2773-2942	-	36.58	-0.13	1	PF00098	7	P62633|CNBP||NA|NA;P62633|CNBP|UGGAGNW|28329689|PAR-CLIP,P62633|CNBP||NA|NA	6	0.827917
Q3ZBG7	ENSBTAG00000012803	SRP19	novel.circ.001245	301-352	-	14.3	-0.14	1	PF01922	1	P09132|SRP19|547|20179341|PDB	5	0.827708
Q2T9U1	ENSBTAG00000019085	SRP54	novel.circ.000227	1293-1362	-	18.27	-0.14	1	PF00448,PF02978,PF02881,PF02492	4	P61011|SRP54|456|12244299|PDB	7	0.827583
Q9XSJ0	ENSBTAG00000013620	UCHL5	novel.circ.001043	12581-13106	-	105.55	-0.14	1	PF01088,PF18031	2	Q9Y5K5|UCHL5|HepG2.UCHL5.4.200|31226278|eCLIP_ENCODE;Q9Y5K5|UCHL5|K562.UCHL5.6.175|31226278|eCLIP_ENCODE	4	0.827458
Q2KIR1	ENSBTAG00000009077	SNRPA	novel.circ.002424	166-221	-	14.54	-0.14	1	PF00076	2	P09012|SNRPA|M348_0.6|10094314|cisBP-RNA,P09012|SNRPA|M347_0.6|10094314|cisBP-RNA	3	0.827417
Q3ZBG7	ENSBTAG00000012803	SRP19	novel.circ.000597	343-394	-	14.54	-0.14	1	PF01922	1	P09132|SRP19|547|20179341|PDB	2	0.827417
Q3ZBG7	ENSBTAG00000012803	SRP19	novel.circ.001338	101-152	-	11.09	-0.15	1	PF01922	1	P09132|SRP19|547|20179341|PDB	2	0.827208
Q8WN55	ENSBTAG00000045828	PTBP1	novel.circ.003307	101-152	-	7.87	-0.15	1	PF13893,PF00076,PF11835	7	P26599|PTBP1|143|16179478|RBPDB;P26599|PTBP1|1314|9826658|AEDB	4	0.827208
Q0VCZ3	ENSBTAG00000015771	YTHDF2	novel.circ.000084	76-127	-	7.86	-0.15	1	PF04146	1	Q9Y5A9|YTHDF2|DRACH|27602518|iCLIP	3	0.827167
Q1LZB6	ENSBTAG00000016744	CAPRIN1	novel.circ.001043	12581-13106	-	105.02	-0.15	1	PF12287,PF18293	2	Q14444|CAPRIN1|WWWUAAAW|24393468|PAR-CLIP,Q14444|CAPRIN1|TWWAAATWW|24393468|PAR-CLIP	2	0.826958
Q3T127	ENSBTAG00000023610	U2AF1L4	novel.circ.001549	309-366	-	15.74	-0.15	1	PF00642,PF00076	3	Q01081|U2AF1|HepG2.U2AF1.0.228|31226278|eCLIP_ENCODE,Q01081|U2AF1|K562.U2AF1.4.144|31226278|eCLIP_ENCODE;Q01081|U2AF1|K562.U2AF1.1.191|31226278|eCLIP_ENCODE	2	0.826917
Q28141	ENSBTAG00000019821	DHX9	novel.circ.001043	12581-13106	-	104.84	-0.16	1	PF00035,PF00271,PF04408,PF07717,PF00270	6	Q08211|DHX9|435|23361462|PDB	9	0.82675
A1A4K8	ENSBTAG00000011645	U2AF1	novel.circ.001549	309-366	-	15.6	-0.16	1	PF00642,PF00076	3	Q01081|U2AF1|HepG2.U2AF1.0.228|31226278|eCLIP_ENCODE,Q01081|U2AF1|K562.U2AF1.4.144|31226278|eCLIP_ENCODE;Q01081|U2AF1|K562.U2AF1.1.191|31226278|eCLIP_ENCODE	2	0.826583
Q3SZR8	ENSBTAG00000040006	SRSF3	novel.circ.001457	83-134	-	5.72	-0.16	1	PF00076	1	P84103|SRSF3|UGGAC|26876937|PAR-CLIP;P84103|SRSF3|starBase_4|26876937|PAR-CLIP,P84103|SRSF3|s81|10022858|SpliceAid-F,P84103|SRSF3|1245|17036044|SpliceAid-F,P84103|SRSF3|1244|17036044|SpliceAid-F,P84103|SRSF3|NA|NA|NA;P84103|SRSF3|s41|10094314|SpliceAid-F,P84103|SRSF3|1249|17036044|SpliceAid-F,P84103|SRSF3|1251|17036044|SpliceAid-F,P84103|SRSF3|starBase_1|26876937|PAR-CLIP,P84103|SRSF3|NA|NA|NA	4	0.826583
Q5EA53	ENSBTAG00000021016	GTF2F1	novel.circ.001945	651-702	-	13.73	-0.17	1	PF05793	1	P35269|GTF2F1|K562.GTF2F1.1.466|31226278|eCLIP_ENCODE,P35269|GTF2F1|HepG2.GTF2F1.1.345|31226278|eCLIP_ENCODE	2	0.826375
Q3MHX3	ENSBTAG00000031688	RBM4	novel.circ.000016	1501-1802	-	61.56	-0.17	1	PF00076,PF13893,PF00098	4	Q9BWF3|RBM4|1146|16260624|SpliceAid-F,Q9BWF3|RBM4|1145|16777844|SpliceAid-F,Q9BWF3|RBM4|1147|21518792|SpliceAid-F	3	0.826167
Q3SZR8	ENSBTAG00000040006	SRSF3	novel.circ.000239	51-102	-	7.49	-0.17	1	PF00076	1	P84103|SRSF3|s41|10094314|SpliceAid-F,P84103|SRSF3|1249|17036044|SpliceAid-F,P84103|SRSF3|1251|17036044|SpliceAid-F,P84103|SRSF3|starBase_1|26876937|PAR-CLIP,P84103|SRSF3|NA|NA|NA;P84103|SRSF3|UGGAC|26876937|PAR-CLIP	3	0.826125
Q9XSJ0	ENSBTAG00000013620	UCHL5	novel.circ.003178	151-202	-	7.4	-0.18	1	PF01088,PF18031	2	Q9Y5K5|UCHL5|HepG2.UCHL5.4.200|31226278|eCLIP_ENCODE	2	0.825875
Q2T9U1	ENSBTAG00000019085	SRP54	novel.circ.000016	6016-6317	-	61.17	-0.18	1	PF00448,PF02978,PF02881,PF02492	4	P61011|SRP54|456|12244299|PDB	5	0.825625
Q5E9J1	ENSBTAG00000008853	HNRNPF	novel.circ.003130	1293-1362	-	17.44	-0.19	1	PF00076,PF08080	3	P52597|HNRNPF|gugkau|22574288|RBPMap,P52597|HNRNPF|815|19506027|SpliceAid-F,P52597|HNRNPF|1331|12612063|AEDB,P52597|HNRNPF|817|12612063|SpliceAid-F,P52597|HNRNPF|836|NA|NA	2	0.825583
Q0VCZ3	ENSBTAG00000015771	YTHDF2	novel.circ.001449	451-12	back-splicing_junction	9.33	-0.19	1	PF04146	1	Q9Y5A9|YTHDF2|DRACH|27602518|iCLIP	2	0.8255
Q3SZR8	ENSBTAG00000040006	SRSF3	novel.circ.001814	551-602	-	12.7	-0.19	1	PF00076	1	P84103|SRSF3|s41|10094314|SpliceAid-F,P84103|SRSF3|1249|17036044|SpliceAid-F,P84103|SRSF3|1251|17036044|SpliceAid-F,P84103|SRSF3|starBase_1|26876937|PAR-CLIP,P84103|SRSF3|NA|NA|NA;P84103|SRSF3|UGGAC|26876937|PAR-CLIP	4	0.8255
Q3SZR8	ENSBTAG00000040006	SRSF3	novel.circ.004338	59-110	-	9.32	-0.19	1	PF00076	1	P84103|SRSF3|UGGAC|26876937|PAR-CLIP;P84103|SRSF3|starBase_4|26876937|PAR-CLIP,P84103|SRSF3|s81|10022858|SpliceAid-F,P84103|SRSF3|1245|17036044|SpliceAid-F,P84103|SRSF3|1244|17036044|SpliceAid-F,P84103|SRSF3|NA|NA|NA	2	0.8255
Q3ZBG7	ENSBTAG00000012803	SRP19	novel.circ.001300	268-357	-	20.67	-0.2	1	PF01922	1	P09132|SRP19|547|20179341|PDB	2	0.825167
Q3ZBV2	ENSBTAG00000003570	DDX19A	novel.circ.000848	827-896	-	17.18	-0.2	1	PF00270,PF00271	2	Q9UMR2|DDX19B|554|19219046|PDB,Q9UMR2|DDX19B|332|19244245|PDB	4	0.825
Q5E9J1	ENSBTAG00000008853	HNRNPF	novel.circ.003401	217-268	-	7.09	-0.2	1	PF00076,PF08080	3	P52597|HNRNPF|gugkau|22574288|RBPMap,P52597|HNRNPF|815|19506027|SpliceAid-F,P52597|HNRNPF|1331|12612063|AEDB,P52597|HNRNPF|817|12612063|SpliceAid-F,P52597|HNRNPF|836|NA|NA	2	0.824958
Q8WN55	ENSBTAG00000045828	PTBP1	novel.circ.003401	201-252	-	6.97	-0.21	1	PF13893,PF00076,PF11835	7	P26599|PTBP1|143|16179478|RBPDB	2	0.824625
Q2HJ60	ENSBTAG00000005726	HNRNPA2B1	novel.circ.001043	12577-13102	-	102.4	-0.22	1	PF00076	2	P22626|HNRNPA2B1|707|11024030|SpliceAid-F,P22626|HNRNPA2B1|708|16548521|SpliceAid-F,P22626|HNRNPA2B1|705|11024030|SpliceAid-F,P22626|HNRNPA2B1|125|12415010|RBPD	5	0.824292
Q0V898	ENSBTAG00000007453	NELFE	novel.circ.002424	706-761	-	13.16	-0.22	1	PF00076	1	P18615|NELFE|21|18303858|RBPDB	2	0.824208
Q9XSJ0	ENSBTAG00000013620	UCHL5	novel.circ.002840	222-273	-	6.76	-0.22	1	PF01088,PF18031	2	Q9Y5K5|UCHL5|K562.UCHL5.6.175|31226278|eCLIP_ENCODE;Q9Y5K5|UCHL5|HepG2.UCHL5.4.200|31226278|eCLIP_ENCODE	2	0.824042
Q3SZR8	ENSBTAG00000040006	SRSF3	novel.circ.000696	76-127	-	8.74	-0.22	1	PF00076	1	P84103|SRSF3|starBase_4|26876937|PAR-CLIP,P84103|SRSF3|s81|10022858|SpliceAid-F,P84103|SRSF3|1245|17036044|SpliceAid-F,P84103|SRSF3|1244|17036044|SpliceAid-F,P84103|SRSF3|NA|NA|NA;P84103|SRSF3|UGGAC|26876937|PAR-CLIP	3	0.824
Q5EA53	ENSBTAG00000021016	GTF2F1	novel.circ.004264	1607-1776	-	34.37	-0.23	1	PF05793	1	P35269|GTF2F1|K562.GTF2F1.1.466|31226278|eCLIP_ENCODE,P35269|GTF2F1|HepG2.GTF2F1.1.345|31226278|eCLIP_ENCODE	5	0.823917
Q5E9J1	ENSBTAG00000008853	HNRNPF	novel.circ.003024	101-152	-	9.75	-0.23	1	PF00076,PF08080	3	P52597|HNRNPF|gugkau|22574288|RBPMap,P52597|HNRNPF|815|19506027|SpliceAid-F,P52597|HNRNPF|1331|12612063|AEDB,P52597|HNRNPF|817|12612063|SpliceAid-F,P52597|HNRNPF|836|NA|NA	2	0.823833
Q3SZR8	ENSBTAG00000040006	SRSF3	novel.circ.001990	1222-1277	-	12.97	-0.23	1	PF00076	1	P84103|SRSF3|UGGAC|26876937|PAR-CLIP;P84103|SRSF3|s41|10094314|SpliceAid-F,P84103|SRSF3|1249|17036044|SpliceAid-F,P84103|SRSF3|1251|17036044|SpliceAid-F,P84103|SRSF3|starBase_1|26876937|PAR-CLIP,P84103|SRSF3|NA|NA|NA	9	0.82375
Q3T0I4	ENSBTAG00000008498	ALYREF	novel.circ.001043	12315-12840	-	101.65	-0.24	1	PF00076,PF13865	2	Q86V81|ALYREF|CUUCG|28934468|iCLIP	6	0.823542
Q2T9U1	ENSBTAG00000019085	SRP54	novel.circ.002745	301-352	-	8.55	-0.24	1	PF00448,PF02978,PF02881,PF02492	4	P61011|SRP54|456|12244299|PDB	3	0.8235
Q5E9J1	ENSBTAG00000008853	HNRNPF	novel.circ.001945	1051-1102	-	12.47	-0.24	1	PF00076,PF08080	3	P52597|HNRNPF|gugkau|22574288|RBPMap,P52597|HNRNPF|815|19506027|SpliceAid-F,P52597|HNRNPF|1331|12612063|AEDB,P52597|HNRNPF|817|12612063|SpliceAid-F,P52597|HNRNPF|836|NA|NA	3	0.823458
Q3ZBV2	ENSBTAG00000003570	DDX19A	novel.circ.003130	1293-1362	-	16.47	-0.24	1	PF00270,PF00271	2	Q9UMR2|DDX19B|554|19219046|PDB,Q9UMR2|DDX19B|332|19244245|PDB	4	0.823292
Q9XSJ0	ENSBTAG00000013620	UCHL5	novel.circ.000016	7216-7517	-	59.42	-0.24	1	PF01088,PF18031	2	Q9Y5K5|UCHL5|K562.UCHL5.6.175|31226278|eCLIP_ENCODE	6	0.823167
Q3SZR8	ENSBTAG00000040006	SRSF3	novel.circ.000844	1-52	-	6.43	-0.25	1	PF00076	1	P84103|SRSF3|UGGAC|26876937|PAR-CLIP	2	0.823083
Q3SZR8	ENSBTAG00000040006	SRSF3	novel.circ.003355	1-52	-	12.61	-0.25	1	PF00076	1	P84103|SRSF3|s41|10094314|SpliceAid-F,P84103|SRSF3|1249|17036044|SpliceAid-F,P84103|SRSF3|1251|17036044|SpliceAid-F,P84103|SRSF3|starBase_1|26876937|PAR-CLIP,P84103|SRSF3|NA|NA|NA;P84103|SRSF3|UGGAC|26876937|PAR-CLIP;P84103|SRSF3|starBase_6|26876937|PAR-CLIP,P84103|SRSF3|1354|19273129|AEDB,P84103|SRSF3|starBase_3|26876937|PAR-CLIP	4	0.822917
Q2T9U1	ENSBTAG00000019085	SRP54	novel.circ.003307	1-52	-	6.29	-0.26	1	PF00448,PF02978,PF02881,PF02492	4	P61011|SRP54|456|12244299|PDB	2	0.822708
Q2T9U1	ENSBTAG00000019085	SRP54	novel.circ.003305	601-652	-	10.98	-0.26	1	PF00448,PF02978,PF02881,PF02492	4	P61011|SRP54|456|12244299|PDB	2	0.822667
Q3T0Q6	ENSBTAG00000012159	CNBP	novel.circ.002965	824-889	-	14.83	-0.26	1	PF00098	7	P62633|CNBP||NA|NA;P62633|CNBP|UGGAGNW|28329689|PAR-CLIP,P62633|CNBP||NA|NA	2	0.822583
A1A4K8	ENSBTAG00000011645	U2AF1	novel.circ.001300	312-401	-	19.53	-0.26	1	PF00642,PF00076	3	Q01081|U2AF1|K562.U2AF1.6.335|31226278|eCLIP_ENCODE,Q01081|U2AF1|HepG2.U2AF1.5.461|31226278|eCLIP_ENCODE	4	0.8225
Q3SZR8	ENSBTAG00000040006	SRSF3	novel.circ.001886	190-241	-	8.13	-0.26	1	PF00076	1	P84103|SRSF3|UGGAC|26876937|PAR-CLIP;P84103|SRSF3|s41|10094314|SpliceAid-F,P84103|SRSF3|1249|17036044|SpliceAid-F,P84103|SRSF3|1251|17036044|SpliceAid-F,P84103|SRSF3|starBase_1|26876937|PAR-CLIP,P84103|SRSF3|NA|NA|NA	2	0.822417
Q2T9U1	ENSBTAG00000019085	SRP54	novel.circ.002965	88-153	-	14.72	-0.26	1	PF00448,PF02978,PF02881,PF02492	4	P61011|SRP54|456|12244299|PDB	4	0.822333
Q3SZR8	ENSBTAG00000040006	SRSF3	novel.circ.004326	2048-2179	-	25.79	-0.27	1	PF00076	1	P84103|SRSF3|starBase_4|26876937|PAR-CLIP,P84103|SRSF3|s81|10022858|SpliceAid-F,P84103|SRSF3|1245|17036044|SpliceAid-F,P84103|SRSF3|1244|17036044|SpliceAid-F,P84103|SRSF3|NA|NA|NA;P84103|SRSF3|UGGAC|26876937|PAR-CLIP;P84103|SRSF3|s41|10094314|SpliceAid-F,P84103|SRSF3|1249|17036044|SpliceAid-F,P84103|SRSF3|1251|17036044|SpliceAid-F,P84103|SRSF3|starBase_1|26876937|PAR-CLIP,P84103|SRSF3|NA|NA|NA	17	0.82225
Q2KIR1	ENSBTAG00000009077	SNRPA	novel.circ.003627	576-627	-	11.29	-0.27	1	PF00076	2	P09012|SNRPA|M348_0.6|10094314|cisBP-RNA,P09012|SNRPA|M347_0.6|10094314|cisBP-RNA	2	0.822167
Q0VCZ3	ENSBTAG00000015771	YTHDF2	novel.circ.003155	8-59	-	5.95	-0.28	1	PF04146	1	Q9Y5A9|YTHDF2|DRACH|27602518|iCLIP	2	0.82175
Q3SZR8	ENSBTAG00000040006	SRSF3	novel.circ.000408	93-144	-	10.57	-0.28	1	PF00076	1	P84103|SRSF3|s41|10094314|SpliceAid-F,P84103|SRSF3|1249|17036044|SpliceAid-F,P84103|SRSF3|1251|17036044|SpliceAid-F,P84103|SRSF3|starBase_1|26876937|PAR-CLIP,P84103|SRSF3|NA|NA|NA;P84103|SRSF3|UGGAC|26876937|PAR-CLIP	2	0.821667
Q5E9J1	ENSBTAG00000008853	HNRNPF	novel.circ.000227	917-986	-	15.75	-0.28	1	PF00076,PF08080	3	P52597|HNRNPF|gugkau|22574288|RBPMap,P52597|HNRNPF|815|19506027|SpliceAid-F,P52597|HNRNPF|1331|12612063|AEDB,P52597|HNRNPF|817|12612063|SpliceAid-F,P52597|HNRNPF|836|NA|NA	3	0.821583
Q5E9J1	ENSBTAG00000008853	HNRNPF	novel.circ.003014	78-129	-	5.89	-0.28	1	PF00076,PF08080	3	P52597|HNRNPF|gugkau|22574288|RBPMap,P52597|HNRNPF|815|19506027|SpliceAid-F,P52597|HNRNPF|1331|12612063|AEDB,P52597|HNRNPF|817|12612063|SpliceAid-F,P52597|HNRNPF|836|NA|NA	2	0.821583
Q863B3	ENSBTAG00000010692	SND1	novel.circ.002876	232-307	-	86.46	3.72	1	PF00565,PF00567	6	Q7KZF4|SND1|K562.SND1.3.75|31226278|eCLIP_ENCODE,Q7KZF4|SND1|K562.SND1.6.82|31226278|eCLIP_ENCODE	1	0.821542
Q1RMJ7	ENSBTAG00000010393	TRNAU1AP	novel.circ.003355	1-52	-	11.96	-0.29	1	PF17654,PF00076	3	Q9NX07|TRNAU1AP|427|31724725|RBNS_ENCODE,Q9NX07|TRNAU1AP|428|31724725|RBNS_ENCODE	2	0.821417
Q28165	ENSBTAG00000006884	PABPN1	novel.circ.001323	4-55	-	9.63	-0.29	1	PF00076	1	Q86U42|PABPN1|M148_0.6|23846655|cisBP-RNA	4	0.821375
Q1JQD2	ENSBTAG00000000080	GRWD1	novel.circ.001814	676-727	-	10.77	-0.3	1	PF00400,PF12265	3	Q9BQ67|GRWD1|HepG2.GRWD1.8.169|31226278|eCLIP_ENCODE;Q9BQ67|GRWD1|HepG2.GRWD1.6.332|31226278|eCLIP_ENCODE,Q9BQ67|GRWD1|HepG2.GRWD1.2.313|31226278|eCLIP_ENCODE	2	0.820917
Q0VCZ3	ENSBTAG00000015771	YTHDF2	novel.circ.001681	420-471	-	7.53	-0.3	1	PF04146	1	Q9Y5A9|YTHDF2|DRACH|27602518|iCLIP	4	0.820833
Q8WN55	ENSBTAG00000045828	PTBP1	novel.circ.001112	244-37	back-splicing_junction	5.62	-0.3	1	PF13893,PF00076,PF11835	7	P26599|PTBP1|143|16179478|RBPDB	2	0.820792
Q3SZR8	ENSBTAG00000040006	SRSF3	novel.circ.002262	376-427	-	10.18	-0.3	1	PF00076	1	P84103|SRSF3|UGGAC|26876937|PAR-CLIP;P84103|SRSF3|s41|10094314|SpliceAid-F,P84103|SRSF3|1249|17036044|SpliceAid-F,P84103|SRSF3|1251|17036044|SpliceAid-F,P84103|SRSF3|starBase_1|26876937|PAR-CLIP,P84103|SRSF3|NA|NA|NA	7	0.82075
Q8HXM1	ENSBTAG00000003547	CSTF2	novel.circ.003236	151-202	-	5.58	-0.3	1	PF14327,PF00076,PF14304	3	P33240|CSTF2|SUGUSU|22813749|PAR-CLIP,P33240|CSTF2|HepG2.CSTF2.2.530|31226278|eCLIP_ENCODE,P33240|CSTF2|19|12773396|RBPDB,P33240|CSTF2|112|12773396|RBPDB,P33240|CSTF2|162|NA|NA	3	0.820708
Q3SZR8	ENSBTAG00000040006	SRSF3	novel.circ.000493	1184-1235	-	11.65	-0.3	1	PF00076	1	P84103|SRSF3|s41|10094314|SpliceAid-F,P84103|SRSF3|1249|17036044|SpliceAid-F,P84103|SRSF3|1251|17036044|SpliceAid-F,P84103|SRSF3|starBase_1|26876937|PAR-CLIP,P84103|SRSF3|NA|NA|NA;P84103|SRSF3|UGGAC|26876937|PAR-CLIP;P84103|SRSF3|starBase_6|26876937|PAR-CLIP,P84103|SRSF3|1354|19273129|AEDB,P84103|SRSF3|starBase_3|26876937|PAR-CLIP	8	0.820667
P67808	ENSBTAG00000017368	YBX1	novel.circ.000928	9361-10082	-	134.68	-0.31	1	PF00313	1	P67809|YBX1|1293|18503770|SpliceAid-F,P67809|YBX1|1321|19273129|AEDB,P67809|YBX1|1290|11447123|SpliceAid-F,P67809|YBX1|1339|11447123|AEDB,P67809|YBX1|1291|11447123|SpliceAid-F;P67809|YBX1|124|15798215|RBPDB	3	0.820542
Q863B3	ENSBTAG00000010692	SND1	novel.circ.000720	476-527	-	80.83	3.69	1	PF00565,PF00567	6	Q7KZF4|SND1|K562.SND1.2.81|31226278|eCLIP_ENCODE,Q7KZF4|SND1|HepG2.SND1.0.91|31226278|eCLIP_ENCODE	1	0.8205
Q3T0I4	ENSBTAG00000008498	ALYREF	novel.circ.001086	158-209	-	64.21	3.69	1	PF00076,PF13865	2	Q86V81|ALYREF|CUUCG|28934468|iCLIP	1	0.820458
Q8WN55	ENSBTAG00000045828	PTBP1	novel.circ.002790	103-154	-	9.21	-0.31	1	PF13893,PF00076,PF11835	7	P26599|PTBP1|143|16179478|RBPDB;P26599|PTBP1|1314|9826658|AEDB	8	0.820333
Q863B3	ENSBTAG00000010692	SND1	novel.circ.003156	465-516	-	77.42	3.68	1	PF00565,PF00567	6	Q7KZF4|SND1|K562.SND1.4.86|31226278|eCLIP_ENCODE	1	0.820042
Q863B3	ENSBTAG00000010692	SND1	novel.circ.004338	251-302	-	71.53	3.68	1	PF00565,PF00567	6	Q7KZF4|SND1|HepG2.SND1.5.68|31226278|eCLIP_ENCODE	1	0.82
P10881	ENSBTAG00000008716	SSB	novel.circ.000016	4501-4802	-	57.12	-0.32	1	PF08777,PF05383,PF00076	3	P05455|SSB|58|11342556|RBPDB,P05455|SSB|457|16387655|PDB	3	0.819958
Q5E9J1	ENSBTAG00000008853	HNRNPF	novel.circ.000987	531-582	-	10.88	-0.32	1	PF00076,PF08080	3	P52597|HNRNPF|gugkau|22574288|RBPMap,P52597|HNRNPF|815|19506027|SpliceAid-F,P52597|HNRNPF|1331|12612063|AEDB,P52597|HNRNPF|817|12612063|SpliceAid-F,P52597|HNRNPF|836|NA|NA	5	0.819792
Q3SZR8	ENSBTAG00000040006	SRSF3	novel.circ.004044	151-202	-	7.12	-0.32	1	PF00076	1	P84103|SRSF3|starBase_4|26876937|PAR-CLIP,P84103|SRSF3|s81|10022858|SpliceAid-F,P84103|SRSF3|1245|17036044|SpliceAid-F,P84103|SRSF3|1244|17036044|SpliceAid-F,P84103|SRSF3|NA|NA|NA;P84103|SRSF3|UGGAC|26876937|PAR-CLIP	2	0.819792
Q8WN55	ENSBTAG00000045828	PTBP1	novel.circ.000084	103-154	-	5.26	-0.32	1	PF13893,PF00076,PF11835	7	P26599|PTBP1|143|16179478|RBPDB	2	0.819792
Q3T127	ENSBTAG00000023610	U2AF1L4	novel.circ.001300	312-401	-	18.32	-0.33	1	PF00642,PF00076	3	Q01081|U2AF1|K562.U2AF1.6.335|31226278|eCLIP_ENCODE,Q01081|U2AF1|HepG2.U2AF1.5.461|31226278|eCLIP_ENCODE	4	0.819625
Q3SZR8	ENSBTAG00000040006	SRSF3	novel.circ.003958	796-847	-	10.79	-0.33	1	PF00076	1	P84103|SRSF3|UGGAC|26876937|PAR-CLIP;P84103|SRSF3|s41|10094314|SpliceAid-F,P84103|SRSF3|1249|17036044|SpliceAid-F,P84103|SRSF3|1251|17036044|SpliceAid-F,P84103|SRSF3|starBase_1|26876937|PAR-CLIP,P84103|SRSF3|NA|NA|NA;P84103|SRSF3|starBase_4|26876937|PAR-CLIP,P84103|SRSF3|s81|10022858|SpliceAid-F,P84103|SRSF3|1245|17036044|SpliceAid-F,P84103|SRSF3|1244|17036044|SpliceAid-F,P84103|SRSF3|NA|NA|NA	12	0.819583
Q3SZR8	ENSBTAG00000040006	SRSF3	novel.circ.000685	305-382	-	16	-0.33	1	PF00076	1	P84103|SRSF3|s41|10094314|SpliceAid-F,P84103|SRSF3|1249|17036044|SpliceAid-F,P84103|SRSF3|1251|17036044|SpliceAid-F,P84103|SRSF3|starBase_1|26876937|PAR-CLIP,P84103|SRSF3|NA|NA|NA;P84103|SRSF3|UGGAC|26876937|PAR-CLIP	6	0.819417
Q5EA53	ENSBTAG00000021016	GTF2F1	novel.circ.003307	1-52	-	5.09	-0.34	1	PF05793	1	P35269|GTF2F1|K562.GTF2F1.1.466|31226278|eCLIP_ENCODE,P35269|GTF2F1|HepG2.GTF2F1.1.345|31226278|eCLIP_ENCODE	2	0.819292
Q3SZR8	ENSBTAG00000040006	SRSF3	novel.circ.000933	330-381	-	6.9	-0.34	1	PF00076	1	P84103|SRSF3|starBase_6|26876937|PAR-CLIP,P84103|SRSF3|1354|19273129|AEDB,P84103|SRSF3|starBase_3|26876937|PAR-CLIP;P84103|SRSF3|s41|10094314|SpliceAid-F,P84103|SRSF3|1249|17036044|SpliceAid-F,P84103|SRSF3|1251|17036044|SpliceAid-F,P84103|SRSF3|starBase_1|26876937|PAR-CLIP,P84103|SRSF3|NA|NA|NA;P84103|SRSF3|ugcygyy|19296853|RBPMap	3	0.819208
Q3SZR8	ENSBTAG00000040006	SRSF3	novel.circ.000597	343-394	-	11	-0.34	1	PF00076	1	P84103|SRSF3|s41|10094314|SpliceAid-F,P84103|SRSF3|1249|17036044|SpliceAid-F,P84103|SRSF3|1251|17036044|SpliceAid-F,P84103|SRSF3|starBase_1|26876937|PAR-CLIP,P84103|SRSF3|NA|NA|NA;P84103|SRSF3|UGGAC|26876937|PAR-CLIP	5	0.819167
Q8WN55	ENSBTAG00000045828	PTBP1	novel.circ.003014	51-102	-	5	-0.34	1	PF13893,PF00076,PF11835	7	P26599|PTBP1|143|16179478|RBPDB	3	0.819042
Q3SZR8	ENSBTAG00000040006	SRSF3	novel.circ.001338	346-397	-	7.79	-0.35	1	PF00076	1	P84103|SRSF3|starBase_6|26876937|PAR-CLIP,P84103|SRSF3|1354|19273129|AEDB,P84103|SRSF3|starBase_3|26876937|PAR-CLIP;P84103|SRSF3|s41|10094314|SpliceAid-F,P84103|SRSF3|1249|17036044|SpliceAid-F,P84103|SRSF3|1251|17036044|SpliceAid-F,P84103|SRSF3|starBase_1|26876937|PAR-CLIP,P84103|SRSF3|NA|NA|NA	2	0.818875
Q3SZR8	ENSBTAG00000040006	SRSF3	novel.circ.003863	865-916	-	10.86	-0.35	1	PF00076	1	P84103|SRSF3|UGGAC|26876937|PAR-CLIP;P84103|SRSF3|s41|10094314|SpliceAid-F,P84103|SRSF3|1249|17036044|SpliceAid-F,P84103|SRSF3|1251|17036044|SpliceAid-F,P84103|SRSF3|starBase_1|26876937|PAR-CLIP,P84103|SRSF3|NA|NA|NA	4	0.818833
Q8WN55	ENSBTAG00000045828	PTBP1	novel.circ.002670	101-152	-	6.74	-0.35	1	PF13893,PF00076,PF11835	7	P26599|PTBP1|143|16179478|RBPDB;P26599|PTBP1|994|16431980|SpliceAid-F,P26599|PTBP1|1002|16260624|SpliceAid-F	4	0.818792
Q2HJ60	ENSBTAG00000005726	HNRNPA2B1	novel.circ.000685	305-382	-	15.69	-0.35	1	PF00076	2	P22626|HNRNPA2B1|707|11024030|SpliceAid-F,P22626|HNRNPA2B1|708|16548521|SpliceAid-F,P22626|HNRNPA2B1|705|11024030|SpliceAid-F,P22626|HNRNPA2B1|125|12415010|RBPD	2	0.818667
Q8WN55	ENSBTAG00000045828	PTBP1	novel.circ.003929	754-823	-	14.43	-0.36	1	PF13893,PF00076,PF11835	7	P26599|PTBP1|143|16179478|RBPDB;P26599|PTBP1|1314|9826658|AEDB	14	0.818458
Q8WN55	ENSBTAG00000045828	PTBP1	novel.circ.003608	178-229	-	6.6	-0.36	1	PF13893,PF00076,PF11835	7	P26599|PTBP1|143|16179478|RBPDB	3	0.818458
Q5EA53	ENSBTAG00000021016	GTF2F1	novel.circ.001300	397-486	-	17.77	-0.36	1	PF05793	1	P35269|GTF2F1|K562.GTF2F1.1.466|31226278|eCLIP_ENCODE,P35269|GTF2F1|HepG2.GTF2F1.1.345|31226278|eCLIP_ENCODE	2	0.818333
Q5EA53	ENSBTAG00000021016	GTF2F1	novel.circ.002424	949-1004	-	10.65	-0.36	1	PF05793	1	P35269|GTF2F1|K562.GTF2F1.1.466|31226278|eCLIP_ENCODE,P35269|GTF2F1|HepG2.GTF2F1.1.345|31226278|eCLIP_ENCODE	3	0.818333
Q3SZR8	ENSBTAG00000040006	SRSF3	novel.circ.001046	75-126	-	6.52	-0.36	1	PF00076	1	P84103|SRSF3|UGGAC|26876937|PAR-CLIP	2	0.81825
Q3SZR8	ENSBTAG00000040006	SRSF3	novel.circ.001549	309-366	-	11.91	-0.36	1	PF00076	1	P84103|SRSF3|s41|10094314|SpliceAid-F,P84103|SRSF3|1249|17036044|SpliceAid-F,P84103|SRSF3|1251|17036044|SpliceAid-F,P84103|SRSF3|starBase_1|26876937|PAR-CLIP,P84103|SRSF3|NA|NA|NA	2	0.818208
Q1JQD2	ENSBTAG00000000080	GRWD1	novel.circ.003958	996-1047	-	10.17	-0.36	1	PF00400,PF12265	3	Q9BQ67|GRWD1|HepG2.GRWD1.8.169|31226278|eCLIP_ENCODE;Q9BQ67|GRWD1|HepG2.GRWD1.6.332|31226278|eCLIP_ENCODE,Q9BQ67|GRWD1|HepG2.GRWD1.2.313|31226278|eCLIP_ENCODE	2	0.818125
Q2T9U1	ENSBTAG00000019085	SRP54	novel.circ.002584	325-376	-	9.11	-0.36	1	PF00448,PF02978,PF02881,PF02492	4	P61011|SRP54|456|12244299|PDB	5	0.818125
A1A4K8	ENSBTAG00000011645	U2AF1	novel.circ.000016	1501-1802	-	55.72	-0.37	1	PF00642,PF00076	3	Q01081|U2AF1|K562.U2AF1.1.191|31226278|eCLIP_ENCODE;Q01081|U2AF1|K562.U2AF1.2.166|31226278|eCLIP_ENCODE;Q01081|U2AF1|K562.U2AF1.6.335|31226278|eCLIP_ENCODE,Q01081|U2AF1|HepG2.U2AF1.5.461|31226278|eCLIP_ENCODE;Q01081|U2AF1|HepG2.U2AF1.0.228|31226278|eCLIP_ENCODE,Q01081|U2AF1|K562.U2AF1.4.144|31226278|eCLIP_ENCODE	8	0.818
Q8WN55	ENSBTAG00000045828	PTBP1	novel.circ.001267	362-37	back-splicing_junction	6.42	-0.37	1	PF13893,PF00076,PF11835	7	P26599|PTBP1|143|16179478|RBPDB;P26599|PTBP1|996|17548433|SpliceAid-F,P26599|PTBP1|1368|9858533|AEDB,P26599|PTBP1|995|9858533|SpliceAid-F,P26599|PTBP1|s100|19561594|SpliceAid-F,P26599|PTBP1|M227_0.6|238|NA	3	0.817958
Q0VCZ3	ENSBTAG00000015771	YTHDF2	novel.circ.002477	522-573	-	9.5	-0.37	1	PF04146	1	Q9Y5A9|YTHDF2|DRACH|27602518|iCLIP	3	0.817917
Q0IIG6	ENSBTAG00000000435	TARBP2	novel.circ.000928	3241-3962	-	131.39	-0.37	1	PF00035	2	Q15633|TARBP2|starBase_1|25043050|HITS-CLIP,Q15633|TARBP2|starBase_4|25043050|HITS-CLIP;Q15633|TARBP2|starBase_2|25043050|HITS-CLIP,Q15633|TARBP2|starBase_6|25043050|HITS-CLIP,Q15633|TARBP2|starBase_3|25043050|HITS-CLIP;Q15633|TARBP2|starBase_5|25043050|HITS-CLIP	12	0.817875
Q0IIG6	ENSBTAG00000000435	TARBP2	novel.circ.003929	754-823	-	14.15	-0.37	1	PF00035	2	Q15633|TARBP2|starBase_1|25043050|HITS-CLIP,Q15633|TARBP2|starBase_4|25043050|HITS-CLIP	2	0.817792
Q3SZR8	ENSBTAG00000040006	SRSF3	novel.circ.001459	201-252	-	7.37	-0.37	1	PF00076	1	P84103|SRSF3|s41|10094314|SpliceAid-F,P84103|SRSF3|1249|17036044|SpliceAid-F,P84103|SRSF3|1251|17036044|SpliceAid-F,P84103|SRSF3|starBase_1|26876937|PAR-CLIP,P84103|SRSF3|NA|NA|NA;P84103|SRSF3|UGGAC|26876937|PAR-CLIP	6	0.817792
Q8WN55	ENSBTAG00000045828	PTBP1	novel.circ.001068	226-277	-	4.54	-0.37	1	PF13893,PF00076,PF11835	7	P26599|PTBP1|143|16179478|RBPDB;P26599|PTBP1|996|17548433|SpliceAid-F,P26599|PTBP1|1368|9858533|AEDB,P26599|PTBP1|995|9858533|SpliceAid-F,P26599|PTBP1|s100|19561594|SpliceAid-F,P26599|PTBP1|M227_0.6|238|NA	4	0.81775
Q3SZR8	ENSBTAG00000040006	SRSF3	novel.circ.000660	657-708	-	8.13	-0.38	1	PF00076	1	P84103|SRSF3|s41|10094314|SpliceAid-F,P84103|SRSF3|1249|17036044|SpliceAid-F,P84103|SRSF3|1251|17036044|SpliceAid-F,P84103|SRSF3|starBase_1|26876937|PAR-CLIP,P84103|SRSF3|NA|NA|NA	2	0.817708
Q3ZBG7	ENSBTAG00000012803	SRP19	novel.circ.002876	306-381	-	15.25	-0.38	1	PF01922	1	P09132|SRP19|547|20179341|PDB	2	0.817625
Q2HJ60	ENSBTAG00000005726	HNRNPA2B1	novel.circ.001245	301-352	-	9.93	-0.38	1	PF00076	2	P22626|HNRNPA2B1|707|11024030|SpliceAid-F,P22626|HNRNPA2B1|708|16548521|SpliceAid-F,P22626|HNRNPA2B1|705|11024030|SpliceAid-F,P22626|HNRNPA2B1|125|12415010|RBPD	2	0.817583
P10881	ENSBTAG00000008716	SSB	novel.circ.000928	3241-3962	-	130.95	-0.38	1	PF08777,PF05383,PF00076	3	P05455|SSB|58|11342556|RBPDB,P05455|SSB|457|16387655|PDB	5	0.817542
Q3SZR8	ENSBTAG00000040006	SRSF3	novel.circ.001245	301-352	-	9.91	-0.38	1	PF00076	1	P84103|SRSF3|UGGAC|26876937|PAR-CLIP;P84103|SRSF3|starBase_2|26876937|PAR-CLIP;P84103|SRSF3|s41|10094314|SpliceAid-F,P84103|SRSF3|1249|17036044|SpliceAid-F,P84103|SRSF3|1251|17036044|SpliceAid-F,P84103|SRSF3|starBase_1|26876937|PAR-CLIP,P84103|SRSF3|NA|NA|NA	5	0.817542
Q8WN55	ENSBTAG00000045828	PTBP1	novel.circ.002263	26-77	-	8.06	-0.38	1	PF13893,PF00076,PF11835	7	P26599|PTBP1|143|16179478|RBPDB;P26599|PTBP1|994|16431980|SpliceAid-F,P26599|PTBP1|1002|16260624|SpliceAid-F;P26599|PTBP1|996|17548433|SpliceAid-F,P26599|PTBP1|1368|9858533|AEDB,P26599|PTBP1|995|9858533|SpliceAid-F,P26599|PTBP1|s100|19561594|SpliceAid-F,P26599|PTBP1|M227_0.6|238|NA	11	0.817542
Q8WN55	ENSBTAG00000045828	PTBP1	novel.circ.001669	212-263	-	6.24	-0.38	1	PF13893,PF00076,PF11835	7	P26599|PTBP1|143|16179478|RBPDB	8	0.8175
Q2HJ60	ENSBTAG00000005726	HNRNPA2B1	novel.circ.001229	5854-177	back-splicing_junction	43.78	-0.38	1	PF00076	2	P22626|HNRNPA2B1|701|12426391|SpliceAid-F,P22626|HNRNPA2B1|710|24452013|SpliceAid-F;P22626|HNRNPA2B1|707|11024030|SpliceAid-F,P22626|HNRNPA2B1|708|16548521|SpliceAid-F,P22626|HNRNPA2B1|705|11024030|SpliceAid-F,P22626|HNRNPA2B1|125|12415010|RBPD	4	0.817458
Q8WN55	ENSBTAG00000045828	PTBP1	novel.circ.002533	176-227	-	4.42	-0.38	1	PF13893,PF00076,PF11835	7	P26599|PTBP1|996|17548433|SpliceAid-F,P26599|PTBP1|1368|9858533|AEDB,P26599|PTBP1|995|9858533|SpliceAid-F,P26599|PTBP1|s100|19561594|SpliceAid-F,P26599|PTBP1|M227_0.6|238|NA;P26599|PTBP1|143|16179478|RBPDB	4	0.817417
Q0V898	ENSBTAG00000007453	NELFE	novel.circ.000016	4801-5102	-	55.28	-0.38	1	PF00076	1	P18615|NELFE|21|18303858|RBPDB;P18615|NELFE|122|18303858|RBPDB,P18615|NELFE|6|18303858|RBPDB	3	0.817375
Q0VCZ3	ENSBTAG00000015771	YTHDF2	novel.circ.003040	1-52	-	7.92	-0.39	1	PF04146	1	Q9Y5A9|YTHDF2|DRACH|27602518|iCLIP	2	0.817208
Q3ZBG7	ENSBTAG00000012803	SRP19	novel.circ.001323	4-55	-	7.91	-0.39	1	PF01922	1	P09132|SRP19|547|20179341|PDB	2	0.817167
Q9XSJ0	ENSBTAG00000013620	UCHL5	novel.circ.000876	401-452	-	7.12	-0.39	1	PF01088,PF18031	2	Q9Y5K5|UCHL5|K562.UCHL5.6.175|31226278|eCLIP_ENCODE	2	0.817167
Q8WN55	ENSBTAG00000045828	PTBP1	novel.circ.000246	276-327	-	6.08	-0.39	1	PF13893,PF00076,PF11835	7	P26599|PTBP1|143|16179478|RBPDB;P26599|PTBP1|996|17548433|SpliceAid-F,P26599|PTBP1|1368|9858533|AEDB,P26599|PTBP1|995|9858533|SpliceAid-F,P26599|PTBP1|s100|19561594|SpliceAid-F,P26599|PTBP1|M227_0.6|238|NA;P26599|PTBP1|993|16431980|SpliceAid-F	5	0.817083
Q5E9J1	ENSBTAG00000008853	HNRNPF	novel.circ.001990	1222-1277	-	10.09	-0.39	1	PF00076,PF08080	3	P52597|HNRNPF|gugkau|22574288|RBPMap,P52597|HNRNPF|815|19506027|SpliceAid-F,P52597|HNRNPF|1331|12612063|AEDB,P52597|HNRNPF|817|12612063|SpliceAid-F,P52597|HNRNPF|836|NA|NA;P52597|HNRNPF|gukgykg|22574288|RBPMap	2	0.817042
Q5E9J1	ENSBTAG00000008853	HNRNPF	novel.circ.003863	865-916	-	10.02	-0.4	1	PF00076,PF08080	3	P52597|HNRNPF|gugkau|22574288|RBPMap,P52597|HNRNPF|815|19506027|SpliceAid-F,P52597|HNRNPF|1331|12612063|AEDB,P52597|HNRNPF|817|12612063|SpliceAid-F,P52597|HNRNPF|836|NA|NA	5	0.816875
Q8WN55	ENSBTAG00000045828	PTBP1	novel.circ.002958	161-37	back-splicing_junction	2.25	-0.4	1	PF13893,PF00076,PF11835	7	P26599|PTBP1|143|16179478|RBPDB	2	0.816833
Q8WN55	ENSBTAG00000045828	PTBP1	novel.circ.002475	151-202	-	4.17	-0.4	1	PF13893,PF00076,PF11835	7	P26599|PTBP1|1314|9826658|AEDB;P26599|PTBP1|143|16179478|RBPDB	3	0.816708
Q863B3	ENSBTAG00000010692	SND1	novel.circ.004328	251-37	back-splicing_junction	62.88	3.6	1	PF00565,PF00567	6	Q7KZF4|SND1|HepG2.SND1.5.68|31226278|eCLIP_ENCODE	1	0.816667
P61286	ENSBTAG00000046358	PABPC1	novel.circ.001229	5677-5914	-	43.21	-0.4	1	PF00076,PF00658	5	P11940|PABPC1|416|10499800|PDB,P11940|PABPC1|452|10499800|PDB,P11940|PABPC1|480|23041282|PDB	5	0.816542
F1MJM0	ENSBTAG00000019133	ZNF326	novel.circ.002834	1695-2252	-	100.47	-0.4	1	PF04988	1	Q5BKZ1|ZNF326|452|31724725|RBNS_ENCODE;Q5BKZ1|ZNF326|450|31724725|RBNS_ENCODE;Q5BKZ1|ZNF326|451|31724725|RBNS_ENCODE,Q5BKZ1|ZNF326|449|31724725|RBNS_ENCODE	4	0.816458
Q3MHR5	ENSBTAG00000018258	SRSF2	novel.circ.004264	2689-2858	-	30.2	-0.41	1	PF00076	1	Q01130|SRSF2|s52|10629063|SpliceAid-F,Q01130|SRSF2|381|31724725|RBNS_ENCODE,Q01130|SRSF2|1311|11825891|AEDB;Q01130|SRSF2|1348|9858550|AEDB,Q01130|SRSF2|1176|9858550|SpliceAid-F,Q01130|SRSF2|ugcygyy|19296853|RBPMap,Q01130|SRSF2|s37|10022858|SpliceAid-F;Q01130|SRSF2|1323|11825891|AEDB,Q01130|SRSF2|s57|10094314|SpliceAid-F;Q01130|SRSF2|1173|19843576|SpliceAid-F,Q01130|SRSF2|1334|11967553|AEDB,Q01130…	6	0.816417
Q8WN55	ENSBTAG00000045828	PTBP1	novel.circ.003155	8-59	-	4.08	-0.41	1	PF13893,PF00076,PF11835	7	P26599|PTBP1|143|16179478|RBPDB	3	0.816417
P10881	ENSBTAG00000008716	SSB	novel.circ.003752	1275-1472	-	38.66	-0.41	1	PF08777,PF05383,PF00076	3	P05455|SSB|58|11342556|RBPDB,P05455|SSB|457|16387655|PDB	2	0.816375
Q3ZBV2	ENSBTAG00000003570	DDX19A	novel.circ.001229	5854-177	back-splicing_junction	42.99	-0.41	1	PF00270,PF00271	2	Q9UMR2|DDX19B|554|19219046|PDB,Q9UMR2|DDX19B|332|19244245|PDB	3	0.816208
Q3SZR8	ENSBTAG00000040006	SRSF3	novel.circ.002632	240-291	-	5.72	-0.41	1	PF00076	1	P84103|SRSF3|s41|10094314|SpliceAid-F,P84103|SRSF3|1249|17036044|SpliceAid-F,P84103|SRSF3|1251|17036044|SpliceAid-F,P84103|SRSF3|starBase_1|26876937|PAR-CLIP,P84103|SRSF3|NA|NA|NA	3	0.816167
Q1JQD2	ENSBTAG00000000080	GRWD1	novel.circ.001900	477-534	-	10.97	-0.42	1	PF00400,PF12265	3	Q9BQ67|GRWD1|HepG2.GRWD1.6.332|31226278|eCLIP_ENCODE,Q9BQ67|GRWD1|HepG2.GRWD1.2.313|31226278|eCLIP_ENCODE;Q9BQ67|GRWD1|HepG2.GRWD1.8.169|31226278|eCLIP_ENCODE	2	0.816042
Q8WN55	ENSBTAG00000045828	PTBP1	novel.circ.000980	151-202	-	5.68	-0.42	1	PF13893,PF00076,PF11835	7	P26599|PTBP1|143|16179478|RBPDB;P26599|PTBP1|994|16431980|SpliceAid-F,P26599|PTBP1|1002|16260624|SpliceAid-F	5	0.816042
Q5E9J1	ENSBTAG00000008853	HNRNPF	novel.circ.001338	101-152	-	6.67	-0.42	1	PF00076,PF08080	3	P52597|HNRNPF|gukgykg|22574288|RBPMap	2	0.816
Q3T0Q6	ENSBTAG00000012159	CNBP	novel.circ.004326	2048-2179	-	22.82	-0.42	1	PF00098	7	P62633|CNBP||NA|NA;P62633|CNBP|UGGAGNW|28329689|PAR-CLIP,P62633|CNBP||NA|NA	3	0.815958
Q8WN55	ENSBTAG00000045828	PTBP1	novel.circ.001229	5736-59	back-splicing_junction	42.79	-0.42	1	PF13893,PF00076,PF11835	7	P26599|PTBP1|143|16179478|RBPDB;P26599|PTBP1|996|17548433|SpliceAid-F,P26599|PTBP1|1368|9858533|AEDB,P26599|PTBP1|995|9858533|SpliceAid-F,P26599|PTBP1|s100|19561594|SpliceAid-F,P26599|PTBP1|M227_0.6|238|NA;P26599|PTBP1|993|16431980|SpliceAid-F	45	0.815875
Q863B3	ENSBTAG00000010692	SND1	novel.circ.003951	793-844	-	76.85	3.58	1	PF00565,PF00567	6	Q7KZF4|SND1|K562.SND1.3.75|31226278|eCLIP_ENCODE,Q7KZF4|SND1|K562.SND1.6.82|31226278|eCLIP_ENCODE	1	0.815667
Q3ZBV2	ENSBTAG00000003570	DDX19A	novel.circ.000928	3241-3962	-	128.46	-0.43	1	PF00270,PF00271	2	Q9UMR2|DDX19B|554|19219046|PDB,Q9UMR2|DDX19B|332|19244245|PDB	24	0.815542
Q3SZR8	ENSBTAG00000040006	SRSF3	novel.circ.001900	477-534	-	10.72	-0.43	1	PF00076	1	P84103|SRSF3|UGGAC|26876937|PAR-CLIP;P84103|SRSF3|s41|10094314|SpliceAid-F,P84103|SRSF3|1249|17036044|SpliceAid-F,P84103|SRSF3|1251|17036044|SpliceAid-F,P84103|SRSF3|starBase_1|26876937|PAR-CLIP,P84103|SRSF3|NA|NA|NA	6	0.815458
Q8WN55	ENSBTAG00000045828	PTBP1	novel.circ.002385	76-127	-	6.33	-0.44	1	PF13893,PF00076,PF11835	7	P26599|PTBP1|143|16179478|RBPDB	3	0.815167
Q8WN55	ENSBTAG00000045828	PTBP1	novel.circ.001469	36-87	-	3.63	-0.44	1	PF13893,PF00076,PF11835	7	P26599|PTBP1|143|16179478|RBPDB	3	0.815167
Q2T9U1	ENSBTAG00000019085	SRP54	novel.circ.002867	1801-2002	-	35.91	-0.44	1	PF00448,PF02978,PF02881,PF02492	4	P61011|SRP54|456|12244299|PDB	5	0.815083
F1MJM0	ENSBTAG00000019133	ZNF326	novel.circ.004326	2048-2179	-	22.36	-0.44	1	PF04988	1	Q5BKZ1|ZNF326|451|31724725|RBNS_ENCODE,Q5BKZ1|ZNF326|449|31724725|RBNS_ENCODE;Q5BKZ1|ZNF326|452|31724725|RBNS_ENCODE	2	0.815
Q863B3	ENSBTAG00000010692	SND1	novel.circ.000848	1541-1610	-	83.14	3.56	1	PF00565,PF00567	6	Q7KZF4|SND1|K562.SND1.3.75|31226278|eCLIP_ENCODE,Q7KZF4|SND1|K562.SND1.6.82|31226278|eCLIP_ENCODE	1	0.815
Q1JQD2	ENSBTAG00000000080	GRWD1	novel.circ.001245	301-352	-	8.81	-0.44	1	PF00400,PF12265	3	Q9BQ67|GRWD1|HepG2.GRWD1.6.332|31226278|eCLIP_ENCODE,Q9BQ67|GRWD1|HepG2.GRWD1.2.313|31226278|eCLIP_ENCODE	2	0.814958
Q0VCZ3	ENSBTAG00000015771	YTHDF2	novel.circ.003111	451-502	-	6.26	-0.44	1	PF04146	1	Q9Y5A9|YTHDF2|DRACH|27602518|iCLIP	3	0.814958
Q8WN55	ENSBTAG00000045828	PTBP1	novel.circ.004280	26-77	-	5.24	-0.44	1	PF13893,PF00076,PF11835	7	P26599|PTBP1|143|16179478|RBPDB	3	0.814917
Q5E9J1	ENSBTAG00000008853	HNRNPF	novel.circ.000493	1184-1235	-	9.17	-0.44	1	PF00076,PF08080	3	P52597|HNRNPF|gugkau|22574288|RBPMap,P52597|HNRNPF|815|19506027|SpliceAid-F,P52597|HNRNPF|1331|12612063|AEDB,P52597|HNRNPF|817|12612063|SpliceAid-F,P52597|HNRNPF|836|NA|NA;P52597|HNRNPF|gukgykg|22574288|RBPMap	2	0.814875
Q5E9J1	ENSBTAG00000008853	HNRNPF	novel.circ.002965	824-889	-	11.51	-0.44	1	PF00076,PF08080	3	P52597|HNRNPF|gugkau|22574288|RBPMap,P52597|HNRNPF|815|19506027|SpliceAid-F,P52597|HNRNPF|1331|12612063|AEDB,P52597|HNRNPF|817|12612063|SpliceAid-F,P52597|HNRNPF|836|NA|NA	8	0.814833
Q2KIV0	ENSBTAG00000051118	NOL12	novel.circ.001229	5854-177	back-splicing_junction	42.11	-0.44	1	PF09805	1	Q9UGY1|NOL12|HepG2.NOL12.2.48|31226278|eCLIP_ENCODE;Q9UGY1|NOL12|HepG2.NOL12.9.52|31226278|eCLIP_ENCODE	2	0.814833
Q0VCZ3	ENSBTAG00000015771	YTHDF2	novel.circ.003929	788-857	-	12.84	-0.45	1	PF04146	1	Q9Y5A9|YTHDF2|DRACH|27602518|iCLIP	8	0.814667
Q8WN55	ENSBTAG00000045828	PTBP1	novel.circ.001046	50-101	-	5.14	-0.45	1	PF13893,PF00076,PF11835	7	P26599|PTBP1|143|16179478|RBPDB	4	0.814667
Q2KIR1	ENSBTAG00000009077	SNRPA	novel.circ.001043	12581-13106	-	92.77	-0.45	1	PF00076	2	P09012|SNRPA|M345_0.6|10094314|cisBP-RNA,P09012|SNRPA|M346_0.6|10094314|cisBP-RNA;P09012|SNRPA|M348_0.6|10094314|cisBP-RNA,P09012|SNRPA|M347_0.6|10094314|cisBP-RNA	8	0.814625
Q3T127	ENSBTAG00000023610	U2AF1L4	novel.circ.000016	1501-1802	-	53.31	-0.45	1	PF00642,PF00076	3	Q01081|U2AF1|K562.U2AF1.1.191|31226278|eCLIP_ENCODE;Q01081|U2AF1|K562.U2AF1.2.166|31226278|eCLIP_ENCODE;Q01081|U2AF1|K562.U2AF1.6.335|31226278|eCLIP_ENCODE,Q01081|U2AF1|HepG2.U2AF1.5.461|31226278|eCLIP_ENCODE;Q01081|U2AF1|HepG2.U2AF1.0.228|31226278|eCLIP_ENCODE,Q01081|U2AF1|K562.U2AF1.4.144|31226278|eCLIP_ENCODE	8	0.814625
Q8WN55	ENSBTAG00000045828	PTBP1	novel.circ.002424	706-761	-	8.87	-0.46	1	PF13893,PF00076,PF11835	7	P26599|PTBP1|143|16179478|RBPDB;P26599|PTBP1|994|16431980|SpliceAid-F,P26599|PTBP1|1002|16260624|SpliceAid-F;P26599|PTBP1|996|17548433|SpliceAid-F,P26599|PTBP1|1368|9858533|AEDB,P26599|PTBP1|995|9858533|SpliceAid-F,P26599|PTBP1|s100|19561594|SpliceAid-F,P26599|PTBP1|M227_0.6|238|NA	16	0.814167
F1MJM0	ENSBTAG00000019133	ZNF326	novel.circ.000928	1801-2522	-	126.58	-0.46	1	PF04988	1	Q5BKZ1|ZNF326|451|31724725|RBNS_ENCODE,Q5BKZ1|ZNF326|449|31724725|RBNS_ENCODE;Q5BKZ1|ZNF326|450|31724725|RBNS_ENCODE;Q5BKZ1|ZNF326|452|31724725|RBNS_ENCODE	9	0.814
Q863B3	ENSBTAG00000010692	SND1	novel.circ.001344	1058-1113	-	79.97	3.53	1	PF00565,PF00567	6	Q7KZF4|SND1|K562.SND1.4.86|31226278|eCLIP_ENCODE	1	0.813792
Q8WN55	ENSBTAG00000045828	PTBP1	novel.circ.002440	1-52	-	4.81	-0.47	1	PF13893,PF00076,PF11835	7	P26599|PTBP1|143|16179478|RBPDB	4	0.813792
Q8WN55	ENSBTAG00000045828	PTBP1	novel.circ.002745	301-352	-	4.81	-0.47	1	PF13893,PF00076,PF11835	7	P26599|PTBP1|143|16179478|RBPDB	2	0.813792
Q8WN55	ENSBTAG00000045828	PTBP1	novel.circ.000866	30-81	-	3.15	-0.47	1	PF13893,PF00076,PF11835	7	P26599|PTBP1|143|16179478|RBPDB;P26599|PTBP1|993|16431980|SpliceAid-F	3	0.813792
Q8WN55	ENSBTAG00000045828	PTBP1	novel.circ.001449	364-415	-	4.71	-0.48	1	PF13893,PF00076,PF11835	7	P26599|PTBP1|143|16179478|RBPDB	5	0.813542
P67808	ENSBTAG00000017368	YBX1	novel.circ.001900	141-198	-	9.79	-0.48	1	PF00313	1	P67809|YBX1|1293|18503770|SpliceAid-F,P67809|YBX1|1321|19273129|AEDB,P67809|YBX1|1290|11447123|SpliceAid-F,P67809|YBX1|1339|11447123|AEDB,P67809|YBX1|1291|11447123|SpliceAid-F;P67809|YBX1|124|15798215|RBPDB	3	0.813375
Q8WN55	ENSBTAG00000045828	PTBP1	novel.circ.002764	26-77	-	5.61	-0.48	1	PF13893,PF00076,PF11835	7	P26599|PTBP1|143|16179478|RBPDB;P26599|PTBP1|993|16431980|SpliceAid-F	6	0.813333
Q3SZR8	ENSBTAG00000040006	SRSF3	novel.circ.003951	201-252	-	7.11	-0.48	1	PF00076	1	P84103|SRSF3|s41|10094314|SpliceAid-F,P84103|SRSF3|1249|17036044|SpliceAid-F,P84103|SRSF3|1251|17036044|SpliceAid-F,P84103|SRSF3|starBase_1|26876937|PAR-CLIP,P84103|SRSF3|NA|NA|NA	3	0.813292
Q8WN55	ENSBTAG00000045828	PTBP1	novel.circ.003400	326-377	-	5.6	-0.48	1	PF13893,PF00076,PF11835	7	P26599|PTBP1|143|16179478|RBPDB	7	0.813292
Q8WN55	ENSBTAG00000045828	PTBP1	novel.circ.000239	226-12	back-splicing_junction	2.92	-0.48	1	PF13893,PF00076,PF11835	7	P26599|PTBP1|143|16179478|RBPDB	2	0.813125
Q8WN55	ENSBTAG00000045828	PTBP1	novel.circ.003040	505-556	-	6.19	-0.49	1	PF13893,PF00076,PF11835	7	P26599|PTBP1|993|16431980|SpliceAid-F;P26599|PTBP1|143|16179478|RBPDB;P26599|PTBP1|1314|9826658|AEDB	8	0.812958
Q8WN55	ENSBTAG00000045828	PTBP1	novel.circ.000011	101-152	-	2.85	-0.49	1	PF13893,PF00076,PF11835	7	P26599|PTBP1|143|16179478|RBPDB	2	0.812958
Q5EA53	ENSBTAG00000021016	GTF2F1	novel.circ.003305	601-652	-	6.94	-0.49	1	PF05793	1	P35269|GTF2F1|K562.GTF2F1.1.466|31226278|eCLIP_ENCODE,P35269|GTF2F1|HepG2.GTF2F1.1.345|31226278|eCLIP_ENCODE	2	0.812875
Q1JQD2	ENSBTAG00000000080	GRWD1	novel.circ.000016	1501-1802	-	52.01	-0.49	1	PF00400,PF12265	3	Q9BQ67|GRWD1|HepG2.GRWD1.6.332|31226278|eCLIP_ENCODE,Q9BQ67|GRWD1|HepG2.GRWD1.2.313|31226278|eCLIP_ENCODE	2	0.812833
P67808	ENSBTAG00000017368	YBX1	novel.circ.002867	1314-1515	-	34.55	-0.49	1	PF00313	1	P67809|YBX1|124|15798215|RBPDB	2	0.812792
Q8WN55	ENSBTAG00000045828	PTBP1	novel.circ.001806	101-152	-	4.4	-0.49	1	PF13893,PF00076,PF11835	7	P26599|PTBP1|1314|9826658|AEDB;P26599|PTBP1|143|16179478|RBPDB	4	0.81275
Q8WN55	ENSBTAG00000045828	PTBP1	novel.circ.001435	161-212	-	5.31	-0.5	1	PF13893,PF00076,PF11835	7	P26599|PTBP1|143|16179478|RBPDB;P26599|PTBP1|993|16431980|SpliceAid-F	6	0.812583
Q3SZR8	ENSBTAG00000040006	SRSF3	novel.circ.003020	309-360	-	4.34	-0.5	1	PF00076	1	P84103|SRSF3|s41|10094314|SpliceAid-F,P84103|SRSF3|1249|17036044|SpliceAid-F,P84103|SRSF3|1251|17036044|SpliceAid-F,P84103|SRSF3|starBase_1|26876937|PAR-CLIP,P84103|SRSF3|NA|NA|NA;P84103|SRSF3|UGGAC|26876937|PAR-CLIP	2	0.812583
Q5E9J1	ENSBTAG00000008853	HNRNPF	novel.circ.000597	343-394	-	8.09	-0.5	1	PF00076,PF08080	3	P52597|HNRNPF|gugkau|22574288|RBPMap,P52597|HNRNPF|815|19506027|SpliceAid-F,P52597|HNRNPF|1331|12612063|AEDB,P52597|HNRNPF|817|12612063|SpliceAid-F,P52597|HNRNPF|836|NA|NA	2	0.812333
Q5E9J1	ENSBTAG00000008853	HNRNPF	novel.circ.001549	309-366	-	9.33	-0.5	1	PF00076,PF08080	3	P52597|HNRNPF|gugkau|22574288|RBPMap,P52597|HNRNPF|815|19506027|SpliceAid-F,P52597|HNRNPF|1331|12612063|AEDB,P52597|HNRNPF|817|12612063|SpliceAid-F,P52597|HNRNPF|836|NA|NA	3	0.812292
F1MJM0	ENSBTAG00000019133	ZNF326	novel.circ.000493	1184-1235	-	8.06	-0.5	1	PF04988	1	Q5BKZ1|ZNF326|451|31724725|RBNS_ENCODE,Q5BKZ1|ZNF326|449|31724725|RBNS_ENCODE;Q5BKZ1|ZNF326|450|31724725|RBNS_ENCODE	2	0.812292
Q9XSJ0	ENSBTAG00000013620	UCHL5	novel.circ.000597	601-652	-	8.04	-0.51	1	PF01088,PF18031	2	Q9Y5K5|UCHL5|HepG2.UCHL5.4.200|31226278|eCLIP_ENCODE	2	0.81225
Q8WN55	ENSBTAG00000045828	PTBP1	novel.circ.003111	151-202	-	5.17	-0.51	1	PF13893,PF00076,PF11835	7	P26599|PTBP1|143|16179478|RBPDB	3	0.812208
Q5E9J1	ENSBTAG00000008853	HNRNPF	novel.circ.001245	301-352	-	7.6	-0.51	1	PF00076,PF08080	3	P52597|HNRNPF|gugkau|22574288|RBPMap,P52597|HNRNPF|815|19506027|SpliceAid-F,P52597|HNRNPF|1331|12612063|AEDB,P52597|HNRNPF|817|12612063|SpliceAid-F,P52597|HNRNPF|836|NA|NA	2	0.812167
Q8WN55	ENSBTAG00000045828	PTBP1	novel.circ.003024	327-378	-	5.15	-0.51	1	PF13893,PF00076,PF11835	7	P26599|PTBP1|143|16179478|RBPDB;P26599|PTBP1|1314|9826658|AEDB	8	0.812167
Q8WN55	ENSBTAG00000045828	PTBP1	novel.circ.001533	53-104	-	4.17	-0.51	1	PF13893,PF00076,PF11835	7	P26599|PTBP1|143|16179478|RBPDB;P26599|PTBP1|993|16431980|SpliceAid-F	5	0.812167
Q8WN55	ENSBTAG00000045828	PTBP1	novel.circ.004264	2773-2942	-	27.8	-0.51	1	PF13893,PF00076,PF11835	7	P26599|PTBP1|143|16179478|RBPDB;P26599|PTBP1|993|16431980|SpliceAid-F;P26599|PTBP1|994|16431980|SpliceAid-F,P26599|PTBP1|1002|16260624|SpliceAid-F;P26599|PTBP1|996|17548433|SpliceAid-F,P26599|PTBP1|1368|9858533|AEDB,P26599|PTBP1|995|9858533|SpliceAid-F,P26599|PTBP1|s100|19561594|SpliceAid-F,P26599|PTBP1|M227_0.6|238|NA;P26599|PTBP1|1314|9826658|AEDB	61	0.812083
Q8WN55	ENSBTAG00000045828	PTBP1	novel.circ.002584	401-452	-	6.59	-0.51	1	PF13893,PF00076,PF11835	7	P26599|PTBP1|143|16179478|RBPDB;P26599|PTBP1|996|17548433|SpliceAid-F,P26599|PTBP1|1368|9858533|AEDB,P26599|PTBP1|995|9858533|SpliceAid-F,P26599|PTBP1|s100|19561594|SpliceAid-F,P26599|PTBP1|M227_0.6|238|NA	5	0.812042
Q3MHR5	ENSBTAG00000018258	SRSF2	novel.circ.002631	86-137	-	2.52	-0.51	1	PF00076	1	Q01130|SRSF2|1380|15247216|AEDB,Q01130|SRSF2|502|22002536|PDB,Q01130|SRSF2|1179|12612063|SpliceAid-F,Q01130|SRSF2|1182|9848651|SpliceAid-F,Q01130|SRSF2|1171|16990281|Spli;Q01130|SRSF2|1323|11825891|AEDB,Q01130|SRSF2|s57|10094314|SpliceAid-F	2	0.812
Q0VCZ3	ENSBTAG00000015771	YTHDF2	novel.circ.003262	1-52	-	4.1	-0.51	1	PF04146	1	Q9Y5A9|YTHDF2|DRACH|27602518|iCLIP	2	0.811958
Q1JQD2	ENSBTAG00000000080	GRWD1	novel.circ.000597	343-394	-	7.88	-0.52	1	PF00400,PF12265	3	Q9BQ67|GRWD1|HepG2.GRWD1.8.169|31226278|eCLIP_ENCODE;Q9BQ67|GRWD1|HepG2.GRWD1.6.332|31226278|eCLIP_ENCODE,Q9BQ67|GRWD1|HepG2.GRWD1.2.313|31226278|eCLIP_ENCODE	3	0.811875
Q8WN55	ENSBTAG00000045828	PTBP1	novel.circ.000720	1014-12	back-splicing_junction	6.96	-0.52	1	PF13893,PF00076,PF11835	7	P26599|PTBP1|143|16179478|RBPDB;P26599|PTBP1|996|17548433|SpliceAid-F,P26599|PTBP1|1368|9858533|AEDB,P26599|PTBP1|995|9858533|SpliceAid-F,P26599|PTBP1|s100|19561594|SpliceAid-F,P26599|PTBP1|M227_0.6|238|NA	8	0.811875
Q8WN55	ENSBTAG00000045828	PTBP1	novel.circ.000933	301-352	-	4.07	-0.52	1	PF13893,PF00076,PF11835	7	P26599|PTBP1|143|16179478|RBPDB	5	0.811875
Q28141	ENSBTAG00000019821	DHX9	novel.circ.000201	679-730	-	75.2	3.48	1	PF00035,PF00271,PF04408,PF07717,PF00270	6	Q08211|DHX9|435|23361462|PDB	1	0.811667
Q8WN55	ENSBTAG00000045828	PTBP1	novel.circ.004338	176-227	-	3.98	-0.52	1	PF13893,PF00076,PF11835	7	P26599|PTBP1|143|16179478|RBPDB	4	0.811667
Q3ZBV2	ENSBTAG00000003570	DDX19A	novel.circ.000016	1501-1802	-	51.17	-0.52	1	PF00270,PF00271	2	Q9UMR2|DDX19B|554|19219046|PDB,Q9UMR2|DDX19B|332|19244245|PDB	13	0.811625
Q1JQD2	ENSBTAG00000000080	GRWD1	novel.circ.003199	551-602	-	6.84	-0.52	1	PF00400,PF12265	3	Q9BQ67|GRWD1|HepG2.GRWD1.6.332|31226278|eCLIP_ENCODE,Q9BQ67|GRWD1|HepG2.GRWD1.2.313|31226278|eCLIP_ENCODE;Q9BQ67|GRWD1|HepG2.GRWD1.8.169|31226278|eCLIP_ENCODE	3	0.811583
Q5E9J1	ENSBTAG00000008853	HNRNPF	novel.circ.001900	477-534	-	8.98	-0.52	1	PF00076,PF08080	3	P52597|HNRNPF|gugkau|22574288|RBPMap,P52597|HNRNPF|815|19506027|SpliceAid-F,P52597|HNRNPF|1331|12612063|AEDB,P52597|HNRNPF|817|12612063|SpliceAid-F,P52597|HNRNPF|836|NA|NA	5	0.8115
Q9XSJ0	ENSBTAG00000013620	UCHL5	novel.circ.001245	476-527	-	7.32	-0.52	1	PF01088,PF18031	2	Q9Y5K5|UCHL5|HepG2.UCHL5.4.200|31226278|eCLIP_ENCODE;Q9Y5K5|UCHL5|K562.UCHL5.6.175|31226278|eCLIP_ENCODE	2	0.8115
Q8WN55	ENSBTAG00000045828	PTBP1	novel.circ.000227	409-478	-	11.49	-0.52	1	PF13893,PF00076,PF11835	7	P26599|PTBP1|143|16179478|RBPDB;P26599|PTBP1|993|16431980|SpliceAid-F;P26599|PTBP1|1314|9826658|AEDB;P26599|PTBP1|994|16431980|SpliceAid-F,P26599|PTBP1|1002|16260624|SpliceAid-F	26	0.811458
Q8WN55	ENSBTAG00000045828	PTBP1	novel.circ.000201	704-755	-	6.35	-0.52	1	PF13893,PF00076,PF11835	7	P26599|PTBP1|143|16179478|RBPDB;P26599|PTBP1|996|17548433|SpliceAid-F,P26599|PTBP1|1368|9858533|AEDB,P26599|PTBP1|995|9858533|SpliceAid-F,P26599|PTBP1|s100|19561594|SpliceAid-F,P26599|PTBP1|M227_0.6|238|NA	3	0.811458
Q3T122	ENSBTAG00000001988	EIF3D	novel.circ.001068	226-277	-	2.3	-0.53	1	PF05091	1	O15371|EIF3D|HepG2.EIF3D.0.116|31226278|eCLIP_ENCODE;O15371|EIF3D|HepG2.EIF3D.7.86|31226278|eCLIP_ENCODE,O15371|EIF3D|HepG2.EIF3D.3.107|31226278|eCLIP_ENCODE	2	0.811375
Q3ZBG7	ENSBTAG00000012803	SRP19	novel.circ.001229	1-238	-	39.89	-0.53	1	PF01922	1	P09132|SRP19|547|20179341|PDB	6	0.811333
Q8WN55	ENSBTAG00000045828	PTBP1	novel.circ.002715	476-527	-	5.5	-0.53	1	PF13893,PF00076,PF11835	7	P26599|PTBP1|1314|9826658|AEDB	2	0.811292
Q8WN55	ENSBTAG00000045828	PTBP1	novel.circ.002480	76-127	-	3.77	-0.53	1	PF13893,PF00076,PF11835	7	P26599|PTBP1|143|16179478|RBPDB	4	0.811125
P10881	ENSBTAG00000008716	SSB	novel.circ.001229	5854-177	back-splicing_junction	39.72	-0.54	1	PF08777,PF05383,PF00076	3	P05455|SSB|58|11342556|RBPDB,P05455|SSB|457|16387655|PDB	3	0.811042
Q0IIG6	ENSBTAG00000000435	TARBP2	novel.circ.003040	505-556	-	5.38	-0.54	1	PF00035	2	Q15633|TARBP2|starBase_1|25043050|HITS-CLIP,Q15633|TARBP2|starBase_4|25043050|HITS-CLIP	2	0.811
Q1RMU5	ENSBTAG00000006330	RBM5	novel.circ.000928	3241-3962	-	122.85	-0.54	1	PF01585,PF17780,PF00076,PF00641,PF12656	5	P52756|RBM5|1148|18840686|SpliceAid-F,P52756|RBM5|UCAUC|24332178|HITS-CLIP;P52756|RBM5|1152|22162216|SpliceAid-F,P52756|RBM5||NA|NA	10	0.811
Q8WN55	ENSBTAG00000045828	PTBP1	novel.circ.004044	126-177	-	3.7	-0.54	1	PF13893,PF00076,PF11835	7	P26599|PTBP1|143|16179478|RBPDB	3	0.810917
Q3MHR5	ENSBTAG00000018258	SRSF2	novel.circ.000928	3241-3962	-	122.49	-0.54	1	PF00076	1	Q01130|SRSF2|1380|15247216|AEDB,Q01130|SRSF2|502|22002536|PDB,Q01130|SRSF2|1179|12612063|SpliceAid-F,Q01130|SRSF2|1182|9848651|SpliceAid-F,Q01130|SRSF2|1171|16990281|Spli;Q01130|SRSF2|1173|19843576|SpliceAid-F,Q01130|SRSF2|1334|11967553|AEDB,Q01130|SRSF2|gryymcyr|19296853|RBPMap;Q01130|SRSF2|1323|11825891|AEDB,Q01130|SRSF2|s57|10094314|SpliceAid-F;Q01130|SRSF2|1348|9858550|AEDB,Q01130|SRSF2|1176|…	17	0.810708
Q8WN55	ENSBTAG00000045828	PTBP1	novel.circ.002477	497-548	-	6.45	-0.54	1	PF13893,PF00076,PF11835	7	P26599|PTBP1|143|16179478|RBPDB;P26599|PTBP1|1314|9826658|AEDB	13	0.810667
Q3SZR8	ENSBTAG00000040006	SRSF3	novel.circ.001323	4-55	-	5.21	-0.55	1	PF00076	1	P84103|SRSF3|s41|10094314|SpliceAid-F,P84103|SRSF3|1249|17036044|SpliceAid-F,P84103|SRSF3|1251|17036044|SpliceAid-F,P84103|SRSF3|starBase_1|26876937|PAR-CLIP,P84103|SRSF3|NA|NA|NA	2	0.810583
Q8WN55	ENSBTAG00000045828	PTBP1	novel.circ.003292	290-341	-	3.57	-0.55	1	PF13893,PF00076,PF11835	7	P26599|PTBP1|996|17548433|SpliceAid-F,P26599|PTBP1|1368|9858533|AEDB,P26599|PTBP1|995|9858533|SpliceAid-F,P26599|PTBP1|s100|19561594|SpliceAid-F,P26599|PTBP1|M227_0.6|238|NA;P26599|PTBP1|143|16179478|RBPDB	3	0.810583
Q8WN55	ENSBTAG00000045828	PTBP1	novel.circ.001165	1-52	-	2.02	-0.55	1	PF13893,PF00076,PF11835	7	P26599|PTBP1|143|16179478|RBPDB	2	0.810583
Q9XSJ0	ENSBTAG00000013620	UCHL5	novel.circ.003400	326-377	-	4.51	-0.55	1	PF01088,PF18031	2	Q9Y5K5|UCHL5|K562.UCHL5.6.175|31226278|eCLIP_ENCODE	2	0.810542
Q2T9U1	ENSBTAG00000019085	SRP54	novel.circ.000084	240-12	back-splicing_junction	2	-0.55	1	PF00448,PF02978,PF02881,PF02492	4	P61011|SRP54|456|12244299|PDB	2	0.810542
Q5EA53	ENSBTAG00000021016	GTF2F1	novel.circ.002584	325-376	-	5.91	-0.55	1	PF05793	1	P35269|GTF2F1|K562.GTF2F1.1.466|31226278|eCLIP_ENCODE,P35269|GTF2F1|HepG2.GTF2F1.1.345|31226278|eCLIP_ENCODE	2	0.810375
Q8WN55	ENSBTAG00000045828	PTBP1	novel.circ.000696	206-257	-	3.49	-0.55	1	PF13893,PF00076,PF11835	7	P26599|PTBP1|143|16179478|RBPDB	5	0.810375
Q8WN55	ENSBTAG00000045828	PTBP1	novel.circ.000237	251-302	-	3.47	-0.55	1	PF13893,PF00076,PF11835	7	P26599|PTBP1|143|16179478|RBPDB;P26599|PTBP1|996|17548433|SpliceAid-F,P26599|PTBP1|1368|9858533|AEDB,P26599|PTBP1|995|9858533|SpliceAid-F,P26599|PTBP1|s100|19561594|SpliceAid-F,P26599|PTBP1|M227_0.6|238|NA	7	0.810333
Q28165	ENSBTAG00000006884	PABPN1	novel.circ.000016	4651-4952	-	50.2	-0.55	1	PF00076	1	Q86U42|PABPN1|M148_0.6|23846655|cisBP-RNA	3	0.810292
Q0IIG6	ENSBTAG00000000435	TARBP2	novel.circ.000720	77-128	-	6.27	-0.55	1	PF00035	2	Q15633|TARBP2|starBase_2|25043050|HITS-CLIP,Q15633|TARBP2|starBase_6|25043050|HITS-CLIP,Q15633|TARBP2|starBase_3|25043050|HITS-CLIP;Q15633|TARBP2|starBase_5|25043050|HITS-CLIP	2	0.81025
Q0V898	ENSBTAG00000007453	NELFE	novel.circ.003863	715-766	-	7.11	-0.56	1	PF00076	1	P18615|NELFE|122|18303858|RBPDB,P18615|NELFE|6|18303858|RBPDB;P18615|NELFE|21|18303858|RBPDB	2	0.810042
Q1JQD2	ENSBTAG00000000080	GRWD1	novel.circ.001323	4-55	-	4.95	-0.56	1	PF00400,PF12265	3	Q9BQ67|GRWD1|HepG2.GRWD1.8.169|31226278|eCLIP_ENCODE	2	0.809958
Q8WN55	ENSBTAG00000045828	PTBP1	novel.circ.003595	401-452	-	4.24	-0.56	1	PF13893,PF00076,PF11835	7	P26599|PTBP1|996|17548433|SpliceAid-F,P26599|PTBP1|1368|9858533|AEDB,P26599|PTBP1|995|9858533|SpliceAid-F,P26599|PTBP1|s100|19561594|SpliceAid-F,P26599|PTBP1|M227_0.6|238|NA;P26599|PTBP1|143|16179478|RBPDB	4	0.809875
Q0VCZ3	ENSBTAG00000015771	YTHDF2	novel.circ.000847	921-974	-	7	-0.56	1	PF04146	1	Q9Y5A9|YTHDF2|DRACH|27602518|iCLIP	2	0.809792
Q3SZR8	ENSBTAG00000040006	SRSF3	novel.circ.001300	268-357	-	14.15	-0.56	1	PF00076	1	P84103|SRSF3|s41|10094314|SpliceAid-F,P84103|SRSF3|1249|17036044|SpliceAid-F,P84103|SRSF3|1251|17036044|SpliceAid-F,P84103|SRSF3|starBase_1|26876937|PAR-CLIP,P84103|SRSF3|NA|NA|NA;P84103|SRSF3|starBase_2|26876937|PAR-CLIP;P84103|SRSF3|UGGAC|26876937|PAR-CLIP;P84103|SRSF3|starBase_4|26876937|PAR-CLIP,P84103|SRSF3|s81|10022858|SpliceAid-F,P84103|SRSF3|1245|17036044|SpliceAid-F,P84103|SRSF3|1244|170…	14	0.809792
Q2T9U1	ENSBTAG00000019085	SRP54	novel.circ.001449	176-227	-	3.25	-0.57	1	PF00448,PF02978,PF02881,PF02492	4	P61011|SRP54|456|12244299|PDB	7	0.80975
Q8WN55	ENSBTAG00000045828	PTBP1	novel.circ.004320	282-343	-	8.21	-0.57	1	PF13893,PF00076,PF11835	7	P26599|PTBP1|143|16179478|RBPDB	12	0.80975
Q3T0Q6	ENSBTAG00000012159	CNBP	novel.circ.003199	551-602	-	6.04	-0.57	1	PF00098	7	P62633|CNBP||NA|NA	2	0.809708
Q3ZBV2	ENSBTAG00000003570	DDX19A	novel.circ.003355	1-52	-	6.92	-0.57	1	PF00270,PF00271	2	Q9UMR2|DDX19B|554|19219046|PDB,Q9UMR2|DDX19B|332|19244245|PDB	7	0.809625
P68509	ENSBTAG00000031134	YWHAH	novel.circ.001300	353-442	-	14.07	-0.57	1	PF00244	1	P61981|YWHAG|K562.YWHAG.1.41|31226278|eCLIP_ENCODE	2	0.809625
Q8WN55	ENSBTAG00000045828	PTBP1	novel.circ.002632	352-37	back-splicing_junction	3.16	-0.57	1	PF13893,PF00076,PF11835	7	P26599|PTBP1|143|16179478|RBPDB	3	0.809542
Q8WN55	ENSBTAG00000045828	PTBP1	novel.circ.003284	851-902	-	5.95	-0.57	1	PF13893,PF00076,PF11835	7	P26599|PTBP1|143|16179478|RBPDB	9	0.8095
Q3SZR8	ENSBTAG00000040006	SRSF3	novel.circ.002840	122-173	-	1.64	-0.57	1	PF00076	1	P84103|SRSF3|UGGAC|26876937|PAR-CLIP;P84103|SRSF3|s41|10094314|SpliceAid-F,P84103|SRSF3|1249|17036044|SpliceAid-F,P84103|SRSF3|1251|17036044|SpliceAid-F,P84103|SRSF3|starBase_1|26876937|PAR-CLIP,P84103|SRSF3|NA|NA|NA	4	0.8095
Q8WN55	ENSBTAG00000045828	PTBP1	novel.circ.002965	88-153	-	9.2	-0.57	1	PF13893,PF00076,PF11835	7	P26599|PTBP1|143|16179478|RBPDB	6	0.809458
Q5EA53	ENSBTAG00000021016	GTF2F1	novel.circ.000016	1051-1352	-	49.52	-0.58	1	PF05793	1	P35269|GTF2F1|K562.GTF2F1.1.466|31226278|eCLIP_ENCODE,P35269|GTF2F1|HepG2.GTF2F1.1.345|31226278|eCLIP_ENCODE	7	0.809333
Q8WN55	ENSBTAG00000045828	PTBP1	novel.circ.003707	252-303	-	4.04	-0.58	1	PF13893,PF00076,PF11835	7	P26599|PTBP1|143|16179478|RBPDB	2	0.809333
Q9XSJ0	ENSBTAG00000013620	UCHL5	novel.circ.003752	2890-3087	-	34.06	-0.58	1	PF01088,PF18031	2	Q9Y5K5|UCHL5|K562.UCHL5.6.175|31226278|eCLIP_ENCODE;Q9Y5K5|UCHL5|HepG2.UCHL5.4.200|31226278|eCLIP_ENCODE	3	0.80925
Q0VCZ3	ENSBTAG00000015771	YTHDF2	novel.circ.001209	51-102	-	5.85	-0.58	1	PF04146	1	Q9Y5A9|YTHDF2|DRACH|27602518|iCLIP	2	0.80925
Q0IIG6	ENSBTAG00000000435	TARBP2	novel.circ.000016	7216-7517	-	49.43	-0.58	1	PF00035	2	Q15633|TARBP2|starBase_2|25043050|HITS-CLIP,Q15633|TARBP2|starBase_6|25043050|HITS-CLIP,Q15633|TARBP2|starBase_3|25043050|HITS-CLIP;Q15633|TARBP2|starBase_1|25043050|HITS-CLIP,Q15633|TARBP2|starBase_4|25043050|HITS-CLIP;Q15633|TARBP2|starBase_5|25043050|HITS-CLIP	3	0.809208
Q3SZR8	ENSBTAG00000040006	SRSF3	novel.circ.003199	197-248	-	5.83	-0.58	1	PF00076	1	P84103|SRSF3|UGGAC|26876937|PAR-CLIP;P84103|SRSF3|s41|10094314|SpliceAid-F,P84103|SRSF3|1249|17036044|SpliceAid-F,P84103|SRSF3|1251|17036044|SpliceAid-F,P84103|SRSF3|starBase_1|26876937|PAR-CLIP,P84103|SRSF3|NA|NA|NA	5	0.809208
Q3SZR8	ENSBTAG00000040006	SRSF3	novel.circ.004067	876-927	-	5.79	-0.58	1	PF00076	1	P84103|SRSF3|UGGAC|26876937|PAR-CLIP;P84103|SRSF3|s41|10094314|SpliceAid-F,P84103|SRSF3|1249|17036044|SpliceAid-F,P84103|SRSF3|1251|17036044|SpliceAid-F,P84103|SRSF3|starBase_1|26876937|PAR-CLIP,P84103|SRSF3|NA|NA|NA	7	0.809125
Q8WN55	ENSBTAG00000045828	PTBP1	novel.circ.002379	51-102	-	1.5	-0.58	1	PF13893,PF00076,PF11835	7	P26599|PTBP1|143|16179478|RBPDB	2	0.809125
Q5E9J1	ENSBTAG00000008853	HNRNPF	novel.circ.001043	12315-12840	-	87.24	-0.58	1	PF00076,PF08080	3	P52597|HNRNPF|gugkau|22574288|RBPMap,P52597|HNRNPF|815|19506027|SpliceAid-F,P52597|HNRNPF|1331|12612063|AEDB,P52597|HNRNPF|817|12612063|SpliceAid-F,P52597|HNRNPF|836|NA|NA	20	0.809083
Q3T122	ENSBTAG00000001988	EIF3D	novel.circ.001669	212-263	-	2.95	-0.58	1	PF05091	1	O15371|EIF3D|HepG2.EIF3D.7.86|31226278|eCLIP_ENCODE,O15371|EIF3D|HepG2.EIF3D.3.107|31226278|eCLIP_ENCODE;O15371|EIF3D|HepG2.EIF3D.0.116|31226278|eCLIP_ENCODE	2	0.809
Q9XSJ0	ENSBTAG00000013620	UCHL5	novel.circ.003958	896-947	-	6.23	-0.58	1	PF01088,PF18031	2	Q9Y5K5|UCHL5|HepG2.UCHL5.4.200|31226278|eCLIP_ENCODE;Q9Y5K5|UCHL5|K562.UCHL5.6.175|31226278|eCLIP_ENCODE	2	0.809
Q0IIG6	ENSBTAG00000000435	TARBP2	novel.circ.001229	5854-177	back-splicing_junction	38.35	-0.59	1	PF00035	2	Q15633|TARBP2|starBase_5|25043050|HITS-CLIP;Q15633|TARBP2|starBase_1|25043050|HITS-CLIP,Q15633|TARBP2|starBase_4|25043050|HITS-CLIP	4	0.808917
Q1RMJ7	ENSBTAG00000010393	TRNAU1AP	novel.circ.000016	1501-1802	-	49.12	-0.59	1	PF17654,PF00076	3	Q9NX07|TRNAU1AP|427|31724725|RBNS_ENCODE,Q9NX07|TRNAU1AP|428|31724725|RBNS_ENCODE	2	0.808792
Q8WN55	ENSBTAG00000045828	PTBP1	novel.circ.004321	623-674	-	4.46	-0.59	1	PF13893,PF00076,PF11835	7	P26599|PTBP1|143|16179478|RBPDB;P26599|PTBP1|996|17548433|SpliceAid-F,P26599|PTBP1|1368|9858533|AEDB,P26599|PTBP1|995|9858533|SpliceAid-F,P26599|PTBP1|s100|19561594|SpliceAid-F,P26599|PTBP1|M227_0.6|238|NA	6	0.80875
Q8HXM1	ENSBTAG00000003547	CSTF2	novel.circ.002424	325-380	-	6.53	-0.59	1	PF14327,PF00076,PF14304	3	P33240|CSTF2|SUGUSU|22813749|PAR-CLIP,P33240|CSTF2|HepG2.CSTF2.2.530|31226278|eCLIP_ENCODE,P33240|CSTF2|19|12773396|RBPDB,P33240|CSTF2|112|12773396|RBPDB,P33240|CSTF2|162|NA|NA	6	0.808708
A1A4K8	ENSBTAG00000011645	U2AF1	novel.circ.001229	1535-1772	-	38.19	-0.59	1	PF00642,PF00076	3	Q01081|U2AF1|K562.U2AF1.6.335|31226278|eCLIP_ENCODE,Q01081|U2AF1|HepG2.U2AF1.5.461|31226278|eCLIP_ENCODE	3	0.808667
Q8WN55	ENSBTAG00000045828	PTBP1	novel.circ.003627	101-152	-	5.59	-0.59	1	PF13893,PF00076,PF11835	7	P26599|PTBP1|994|16431980|SpliceAid-F,P26599|PTBP1|1002|16260624|SpliceAid-F;P26599|PTBP1|143|16179478|RBPDB	3	0.808625
Q0VCZ3	ENSBTAG00000015771	YTHDF2	novel.circ.003284	939-990	-	5.55	-0.6	1	PF04146	1	Q9Y5A9|YTHDF2|DRACH|27602518|iCLIP	3	0.808542
Q9XSJ0	ENSBTAG00000013620	UCHL5	novel.circ.002965	88-153	-	8.79	-0.6	1	PF01088,PF18031	2	Q9Y5K5|UCHL5|HepG2.UCHL5.4.200|31226278|eCLIP_ENCODE	3	0.8085
Q0VCZ3	ENSBTAG00000015771	YTHDF2	novel.circ.002480	101-152	-	2.73	-0.6	1	PF04146	1	Q9Y5A9|YTHDF2|DRACH|27602518|iCLIP	2	0.808417
Q8WN55	ENSBTAG00000045828	PTBP1	novel.circ.000660	657-708	-	4.33	-0.6	1	PF13893,PF00076,PF11835	7	P26599|PTBP1|143|16179478|RBPDB;P26599|PTBP1|993|16431980|SpliceAid-F	10	0.808417
Q1JQD2	ENSBTAG00000000080	GRWD1	novel.circ.000685	310-387	-	11.37	-0.6	1	PF00400,PF12265	3	Q9BQ67|GRWD1|HepG2.GRWD1.8.169|31226278|eCLIP_ENCODE	3	0.808292
A1A4K8	ENSBTAG00000011645	U2AF1	novel.circ.000928	3241-3962	-	119.33	-0.6	1	PF00642,PF00076	3	Q01081|U2AF1|K562.U2AF1.6.335|31226278|eCLIP_ENCODE,Q01081|U2AF1|HepG2.U2AF1.5.461|31226278|eCLIP_ENCODE;Q01081|U2AF1|HepG2.U2AF1.0.228|31226278|eCLIP_ENCODE,Q01081|U2AF1|K562.U2AF1.4.144|31226278|eCLIP_ENCODE;Q01081|U2AF1|K562.U2AF1.1.191|31226278|eCLIP_ENCODE;Q01081|U2AF1|K562.U2AF1.2.166|31226278|eCLIP_ENCODE	15	0.808167
Q5EA53	ENSBTAG00000021016	GTF2F1	novel.circ.002385	137-188	-	3.55	-0.6	1	PF05793	1	P35269|GTF2F1|K562.GTF2F1.1.466|31226278|eCLIP_ENCODE,P35269|GTF2F1|HepG2.GTF2F1.1.345|31226278|eCLIP_ENCODE	2	0.808125
Q3SZI4	ENSBTAG00000002108	YWHAQ	novel.circ.001300	353-442	-	13.43	-0.61	1	PF00244	1	P61981|YWHAG|K562.YWHAG.1.41|31226278|eCLIP_ENCODE	2	0.808083
Q8WN55	ENSBTAG00000045828	PTBP1	novel.circ.000848	817-886	-	10.07	-0.61	1	PF13893,PF00076,PF11835	7	P26599|PTBP1|143|16179478|RBPDB;P26599|PTBP1|996|17548433|SpliceAid-F,P26599|PTBP1|1368|9858533|AEDB,P26599|PTBP1|995|9858533|SpliceAid-F,P26599|PTBP1|s100|19561594|SpliceAid-F,P26599|PTBP1|M227_0.6|238|NA;P26599|PTBP1|994|16431980|SpliceAid-F,P26599|PTBP1|1002|16260624|SpliceAid-F	18	0.808083
Q8WN55	ENSBTAG00000045828	PTBP1	novel.circ.003199	522-573	-	5.36	-0.61	1	PF13893,PF00076,PF11835	7	P26599|PTBP1|143|16179478|RBPDB	5	0.808083
Q3SZR8	ENSBTAG00000040006	SRSF3	novel.circ.003707	51-102	-	3.53	-0.61	1	PF00076	1	P84103|SRSF3|s41|10094314|SpliceAid-F,P84103|SRSF3|1249|17036044|SpliceAid-F,P84103|SRSF3|1251|17036044|SpliceAid-F,P84103|SRSF3|starBase_1|26876937|PAR-CLIP,P84103|SRSF3|NA|NA|NA	2	0.808042
Q8WN55	ENSBTAG00000045828	PTBP1	novel.circ.001209	876-927	-	5.28	-0.61	1	PF13893,PF00076,PF11835	7	P26599|PTBP1|143|16179478|RBPDB;P26599|PTBP1|1314|9826658|AEDB	8	0.807917
Q1JQD2	ENSBTAG00000000080	GRWD1	novel.circ.004326	2406-2537	-	18.93	-0.62	1	PF00400,PF12265	3	Q9BQ67|GRWD1|HepG2.GRWD1.6.332|31226278|eCLIP_ENCODE,Q9BQ67|GRWD1|HepG2.GRWD1.2.313|31226278|eCLIP_ENCODE;Q9BQ67|GRWD1|HepG2.GRWD1.8.169|31226278|eCLIP_ENCODE	3	0.807708
Q3SZR8	ENSBTAG00000040006	SRSF3	novel.circ.002876	306-381	-	11.1	-0.62	1	PF00076	1	P84103|SRSF3|s41|10094314|SpliceAid-F,P84103|SRSF3|1249|17036044|SpliceAid-F,P84103|SRSF3|1251|17036044|SpliceAid-F,P84103|SRSF3|starBase_1|26876937|PAR-CLIP,P84103|SRSF3|NA|NA|NA;P84103|SRSF3|UGGAC|26876937|PAR-CLIP;P84103|SRSF3|starBase_6|26876937|PAR-CLIP,P84103|SRSF3|1354|19273129|AEDB,P84103|SRSF3|starBase_3|26876937|PAR-CLIP	6	0.807667
Q8WN55	ENSBTAG00000045828	PTBP1	novel.circ.001459	151-202	-	3.35	-0.62	1	PF13893,PF00076,PF11835	7	P26599|PTBP1|143|16179478|RBPDB;P26599|PTBP1|994|16431980|SpliceAid-F,P26599|PTBP1|1002|16260624|SpliceAid-F	3	0.807583
Q3T122	ENSBTAG00000001988	EIF3D	novel.circ.002440	1-52	-	2.38	-0.62	1	PF05091	1	O15371|EIF3D|HepG2.EIF3D.0.116|31226278|eCLIP_ENCODE;O15371|EIF3D|HepG2.EIF3D.7.86|31226278|eCLIP_ENCODE,O15371|EIF3D|HepG2.EIF3D.3.107|31226278|eCLIP_ENCODE	2	0.8075
Q8WN55	ENSBTAG00000045828	PTBP1	novel.circ.002187	20-71	-	2.37	-0.62	1	PF13893,PF00076,PF11835	7	P26599|PTBP1|143|16179478|RBPDB;P26599|PTBP1|993|16431980|SpliceAid-F	4	0.8075
Q2T9U1	ENSBTAG00000019085	SRP54	novel.circ.003929	1123-1192	-	9.74	-0.62	1	PF00448,PF02978,PF02881,PF02492	4	P61011|SRP54|456|12244299|PDB	6	0.807292
Q3SZR8	ENSBTAG00000040006	SRSF3	novel.circ.001165	75-126	-	0.85	-0.63	1	PF00076	1	P84103|SRSF3|UGGAC|26876937|PAR-CLIP	2	0.80725
Q3T122	ENSBTAG00000001988	EIF3D	novel.circ.001449	376-427	-	2.26	-0.63	1	PF05091	1	O15371|EIF3D|HepG2.EIF3D.9.59|31226278|eCLIP_ENCODE	2	0.807208
Q5E9J1	ENSBTAG00000008853	HNRNPF	novel.circ.004326	2048-2179	-	18.59	-0.63	1	PF00076,PF08080	3	P52597|HNRNPF|gugkau|22574288|RBPMap,P52597|HNRNPF|815|19506027|SpliceAid-F,P52597|HNRNPF|1331|12612063|AEDB,P52597|HNRNPF|817|12612063|SpliceAid-F,P52597|HNRNPF|836|NA|NA	9	0.807
Q1RMJ7	ENSBTAG00000010393	TRNAU1AP	novel.circ.001229	5854-177	back-splicing_junction	37.15	-0.63	1	PF17654,PF00076	3	Q9NX07|TRNAU1AP|427|31724725|RBNS_ENCODE,Q9NX07|TRNAU1AP|428|31724725|RBNS_ENCODE	3	0.807
Q3MHR5	ENSBTAG00000018258	SRSF2	novel.circ.000232	63-114	-	0.72	-0.64	1	PF00076	1	Q01130|SRSF2|1380|15247216|AEDB,Q01130|SRSF2|502|22002536|PDB,Q01130|SRSF2|1179|12612063|SpliceAid-F,Q01130|SRSF2|1182|9848651|SpliceAid-F,Q01130|SRSF2|1171|16990281|Spli;Q01130|SRSF2|1173|19843576|SpliceAid-F,Q01130|SRSF2|1334|11967553|AEDB,Q01130|SRSF2|gryymcyr|19296853|RBPMap	2	0.806875
Q5E9J1	ENSBTAG00000008853	HNRNPF	novel.circ.000685	305-382	-	10.74	-0.64	1	PF00076,PF08080	3	P52597|HNRNPF|gugkau|22574288|RBPMap,P52597|HNRNPF|815|19506027|SpliceAid-F,P52597|HNRNPF|1331|12612063|AEDB,P52597|HNRNPF|817|12612063|SpliceAid-F,P52597|HNRNPF|836|NA|NA	2	0.806792
Q8WN55	ENSBTAG00000045828	PTBP1	novel.circ.001243	28-79	-	3.65	-0.64	1	PF13893,PF00076,PF11835	7	P26599|PTBP1|143|16179478|RBPDB	2	0.806792
Q8WN55	ENSBTAG00000045828	PTBP1	novel.circ.003156	51-102	-	3.64	-0.64	1	PF13893,PF00076,PF11835	7	P26599|PTBP1|143|16179478|RBPDB;P26599|PTBP1|994|16431980|SpliceAid-F,P26599|PTBP1|1002|16260624|SpliceAid-F	3	0.80675
Q3MHR5	ENSBTAG00000018258	SRSF2	novel.circ.001267	1-52	-	2.04	-0.64	1	PF00076	1	Q01130|SRSF2|1172|19843576|SpliceAid-F,Q01130|SRSF2|1168|11779509|SpliceAid-F;Q01130|SRSF2|1380|15247216|AEDB,Q01130|SRSF2|502|22002536|PDB,Q01130|SRSF2|1179|12612063|SpliceAid-F,Q01130|SRSF2|1182|9848651|SpliceAid-F,Q01130|SRSF2|1171|16990281|Spli	2	0.806625
Q8WN55	ENSBTAG00000045828	PTBP1	novel.circ.002262	376-427	-	4.3	-0.64	1	PF13893,PF00076,PF11835	7	P26599|PTBP1|143|16179478|RBPDB;P26599|PTBP1|993|16431980|SpliceAid-F	7	0.8065
Q9XSJ0	ENSBTAG00000013620	UCHL5	novel.circ.003130	694-763	-	9.34	-0.65	1	PF01088,PF18031	2	Q9Y5K5|UCHL5|HepG2.UCHL5.4.200|31226278|eCLIP_ENCODE;Q9Y5K5|UCHL5|K562.UCHL5.6.175|31226278|eCLIP_ENCODE	2	0.806375
Q9XSJ0	ENSBTAG00000013620	UCHL5	novel.circ.001900	449-506	-	6.72	-0.65	1	PF01088,PF18031	2	Q9Y5K5|UCHL5|K562.UCHL5.6.175|31226278|eCLIP_ENCODE;Q9Y5K5|UCHL5|HepG2.UCHL5.4.200|31226278|eCLIP_ENCODE	3	0.806375
Q8WN55	ENSBTAG00000045828	PTBP1	novel.circ.003951	193-244	-	4.26	-0.65	1	PF13893,PF00076,PF11835	7	P26599|PTBP1|143|16179478|RBPDB	7	0.806375
Q3MHR5	ENSBTAG00000018258	SRSF2	novel.circ.002263	26-77	-	3.47	-0.65	1	PF00076	1	Q01130|SRSF2|s56|10094314|SpliceAid-F,Q01130|SRSF2|439|22002536|PDB,Q01130|SRSF2|M274_0.6|7543047|cisBP-RNA,Q01130|SRSF2|s47|7543047|SpliceAid-F,Q01130|SRSF2|380|31724725|NA;Q01130|SRSF2|1323|11825891|AEDB,Q01130|SRSF2|s57|10094314|SpliceAid-F	3	0.806333
Q8WN55	ENSBTAG00000045828	PTBP1	novel.circ.000847	1-54	-	5.51	-0.65	1	PF13893,PF00076,PF11835	7	P26599|PTBP1|143|16179478|RBPDB;P26599|PTBP1|1314|9826658|AEDB	8	0.806333
Q3T127	ENSBTAG00000023610	U2AF1L4	novel.circ.000928	3241-3962	-	117.02	-0.65	1	PF00642,PF00076	3	Q01081|U2AF1|K562.U2AF1.6.335|31226278|eCLIP_ENCODE,Q01081|U2AF1|HepG2.U2AF1.5.461|31226278|eCLIP_ENCODE;Q01081|U2AF1|HepG2.U2AF1.0.228|31226278|eCLIP_ENCODE,Q01081|U2AF1|K562.U2AF1.4.144|31226278|eCLIP_ENCODE;Q01081|U2AF1|K562.U2AF1.1.191|31226278|eCLIP_ENCODE;Q01081|U2AF1|K562.U2AF1.2.166|31226278|eCLIP_ENCODE	15	0.806292
Q8WN55	ENSBTAG00000045828	PTBP1	novel.circ.003958	46-97	-	5.04	-0.65	1	PF13893,PF00076,PF11835	7	P26599|PTBP1|143|16179478|RBPDB;P26599|PTBP1|993|16431980|SpliceAid-F	10	0.80625
Q8WN55	ENSBTAG00000045828	PTBP1	novel.circ.001980	501-552	-	2.8	-0.65	1	PF13893,PF00076,PF11835	7	P26599|PTBP1|143|16179478|RBPDB	4	0.806208
Q8WN55	ENSBTAG00000045828	PTBP1	novel.circ.001945	276-327	-	4.96	-0.66	1	PF13893,PF00076,PF11835	7	P26599|PTBP1|143|16179478|RBPDB;P26599|PTBP1|994|16431980|SpliceAid-F,P26599|PTBP1|1002|16260624|SpliceAid-F	8	0.806042
Q9XSJ0	ENSBTAG00000013620	UCHL5	novel.circ.003305	179-230	-	4.09	-0.66	1	PF01088,PF18031	2	Q9Y5K5|UCHL5|K562.UCHL5.6.175|31226278|eCLIP_ENCODE	2	0.805958
Q8WN55	ENSBTAG00000045828	PTBP1	novel.circ.000987	526-577	-	4.9	-0.66	1	PF13893,PF00076,PF11835	7	P26599|PTBP1|993|16431980|SpliceAid-F;P26599|PTBP1|143|16179478|RBPDB	6	0.805917
Q8WN55	ENSBTAG00000045828	PTBP1	novel.circ.001814	641-692	-	4.43	-0.66	1	PF13893,PF00076,PF11835	7	P26599|PTBP1|143|16179478|RBPDB	8	0.805875
A1A4K8	ENSBTAG00000011645	U2AF1	novel.circ.003752	1420-1617	-	31.84	-0.66	1	PF00642,PF00076	3	Q01081|U2AF1|K562.U2AF1.1.191|31226278|eCLIP_ENCODE;Q01081|U2AF1|K562.U2AF1.2.166|31226278|eCLIP_ENCODE	2	0.805792
Q8WN55	ENSBTAG00000045828	PTBP1	novel.circ.004067	876-927	-	4.35	-0.66	1	PF13893,PF00076,PF11835	7	P26599|PTBP1|143|16179478|RBPDB	5	0.805708
Q3MHX3	ENSBTAG00000031688	RBM4	novel.circ.001229	5854-177	back-splicing_junction	36.3	-0.66	1	PF00076,PF13893,PF00098	4	Q9BWF3|RBM4|279|31724725|RBNS_ENCODE,Q9BWF3|RBM4|280|31724725|RBNS_ENCODE;Q9BWF3|RBM4|1146|16260624|SpliceAid-F,Q9BWF3|RBM4|1145|16777844|SpliceAid-F,Q9BWF3|RBM4|1147|21518792|SpliceAid-F	3	0.805667
Q3ZBV2	ENSBTAG00000003570	DDX19A	novel.circ.003863	715-766	-	5.22	-0.66	1	PF00270,PF00271	2	Q9UMR2|DDX19B|554|19219046|PDB,Q9UMR2|DDX19B|332|19244245|PDB	2	0.805625
Q1LZB6	ENSBTAG00000016744	CAPRIN1	novel.circ.002867	1801-2002	-	30.27	-0.67	1	PF12287,PF18293	2	Q14444|CAPRIN1|WWWUAAAW|24393468|PAR-CLIP,Q14444|CAPRIN1|TWWAAATWW|24393468|PAR-CLIP	2	0.805542
Q0VCZ3	ENSBTAG00000015771	YTHDF2	novel.circ.003958	1176-1227	-	4.74	-0.67	1	PF04146	1	Q9Y5A9|YTHDF2|DRACH|27602518|iCLIP	2	0.805542
P63103	ENSBTAG00000000236	YWHAZ	novel.circ.001300	353-442	-	12.33	-0.67	1	PF00244	1	P61981|YWHAG|K562.YWHAG.1.41|31226278|eCLIP_ENCODE	2	0.8055
Q3T122	ENSBTAG00000001988	EIF3D	novel.circ.003040	505-556	-	3.11	-0.67	1	PF05091	1	O15371|EIF3D|HepG2.EIF3D.0.116|31226278|eCLIP_ENCODE;O15371|EIF3D|HepG2.EIF3D.7.86|31226278|eCLIP_ENCODE,O15371|EIF3D|HepG2.EIF3D.3.107|31226278|eCLIP_ENCODE	2	0.805458
Q3MHR5	ENSBTAG00000018258	SRSF2	novel.circ.003400	340-391	-	2.5	-0.67	1	PF00076	1	Q01130|SRSF2|1380|15247216|AEDB,Q01130|SRSF2|502|22002536|PDB,Q01130|SRSF2|1179|12612063|SpliceAid-F,Q01130|SRSF2|1182|9848651|SpliceAid-F,Q01130|SRSF2|1171|16990281|Spli;Q01130|SRSF2|1323|11825891|AEDB,Q01130|SRSF2|s57|10094314|SpliceAid-F	2	0.805458
Q3T122	ENSBTAG00000001988	EIF3D	novel.circ.001435	161-212	-	2.49	-0.67	1	PF05091	1	O15371|EIF3D|HepG2.EIF3D.0.116|31226278|eCLIP_ENCODE	2	0.805417
P61286	ENSBTAG00000046358	PABPC1	novel.circ.002834	4449-5006	-	88.95	-0.67	1	PF00076,PF00658	5	P11940|PABPC1|416|10499800|PDB,P11940|PABPC1|452|10499800|PDB,P11940|PABPC1|480|23041282|PDB	14	0.805333
Q3SZR8	ENSBTAG00000040006	SRSF3	novel.circ.000016	1501-1802	-	46.65	-0.67	1	PF00076	1	P84103|SRSF3|s41|10094314|SpliceAid-F,P84103|SRSF3|1249|17036044|SpliceAid-F,P84103|SRSF3|1251|17036044|SpliceAid-F,P84103|SRSF3|starBase_1|26876937|PAR-CLIP,P84103|SRSF3|NA|NA|NA;P84103|SRSF3|UGGAC|26876937|PAR-CLIP;P84103|SRSF3|starBase_2|26876937|PAR-CLIP;P84103|SRSF3|starBase_6|26876937|PAR-CLIP,P84103|SRSF3|1354|19273129|AEDB,P84103|SRSF3|starBase_3|26876937|PAR-CLIP	30	0.805333
Q8WN55	ENSBTAG00000045828	PTBP1	novel.circ.000493	1176-1227	-	5.06	-0.67	1	PF13893,PF00076,PF11835	7	P26599|PTBP1|143|16179478|RBPDB	5	0.80525
Q8WN55	ENSBTAG00000045828	PTBP1	novel.circ.003863	426-477	-	4.94	-0.68	1	PF13893,PF00076,PF11835	7	P26599|PTBP1|143|16179478|RBPDB;P26599|PTBP1|996|17548433|SpliceAid-F,P26599|PTBP1|1368|9858533|AEDB,P26599|PTBP1|995|9858533|SpliceAid-F,P26599|PTBP1|s100|19561594|SpliceAid-F,P26599|PTBP1|M227_0.6|238|NA;P26599|PTBP1|994|16431980|SpliceAid-F,P26599|PTBP1|1002|16260624|SpliceAid-F	15	0.805
Q3MHR5	ENSBTAG00000018258	SRSF2	novel.circ.003292	301-352	-	1.34	-0.68	1	PF00076	1	Q01130|SRSF2|1323|11825891|AEDB,Q01130|SRSF2|s57|10094314|SpliceAid-F	2	0.804833
Q0IIG6	ENSBTAG00000000435	TARBP2	novel.circ.002965	88-153	-	7.16	-0.69	1	PF00035	2	Q15633|TARBP2|starBase_1|25043050|HITS-CLIP,Q15633|TARBP2|starBase_4|25043050|HITS-CLIP;Q15633|TARBP2|starBase_2|25043050|HITS-CLIP,Q15633|TARBP2|starBase_6|25043050|HITS-CLIP,Q15633|TARBP2|starBase_3|25043050|HITS-CLIP	2	0.804667
Q8WN55	ENSBTAG00000045828	PTBP1	novel.circ.001323	504-555	-	2.72	-0.69	1	PF13893,PF00076,PF11835	7	P26599|PTBP1|143|16179478|RBPDB	2	0.8045
Q3T0I4	ENSBTAG00000008498	ALYREF	novel.circ.002368	326-377	-	65.52	3.31	1	PF00076,PF13865	2	Q86V81|ALYREF|CUUCG|28934468|iCLIP	1	0.804458
Q3SZR8	ENSBTAG00000040006	SRSF3	novel.circ.002459	326-377	-	1.18	-0.69	1	PF00076	1	P84103|SRSF3|s41|10094314|SpliceAid-F,P84103|SRSF3|1249|17036044|SpliceAid-F,P84103|SRSF3|1251|17036044|SpliceAid-F,P84103|SRSF3|starBase_1|26876937|PAR-CLIP,P84103|SRSF3|NA|NA|NA;P84103|SRSF3|UGGAC|26876937|PAR-CLIP	5	0.804417
Q3MHR5	ENSBTAG00000018258	SRSF2	novel.circ.003929	754-823	-	8.49	-0.7	1	PF00076	1	Q01130|SRSF2|1323|11825891|AEDB,Q01130|SRSF2|s57|10094314|SpliceAid-F;Q01130|SRSF2|s52|10629063|SpliceAid-F,Q01130|SRSF2|381|31724725|RBNS_ENCODE,Q01130|SRSF2|1311|11825891|AEDB	3	0.804333
Q8WN55	ENSBTAG00000045828	PTBP1	novel.circ.001245	801-852	-	4.23	-0.7	1	PF13893,PF00076,PF11835	7	P26599|PTBP1|143|16179478|RBPDB;P26599|PTBP1|994|16431980|SpliceAid-F,P26599|PTBP1|1002|16260624|SpliceAid-F	5	0.804333
Q3MHR5	ENSBTAG00000018258	SRSF2	novel.circ.003595	401-452	-	2.01	-0.7	1	PF00076	1	Q01130|SRSF2|1380|15247216|AEDB,Q01130|SRSF2|502|22002536|PDB,Q01130|SRSF2|1179|12612063|SpliceAid-F,Q01130|SRSF2|1182|9848651|SpliceAid-F,Q01130|SRSF2|1171|16990281|Spli;Q01130|SRSF2|1173|19843576|SpliceAid-F,Q01130|SRSF2|1334|11967553|AEDB,Q01130|SRSF2|gryymcyr|19296853|RBPMap	2	0.804208
Q8WN55	ENSBTAG00000045828	PTBP1	novel.circ.001990	763-818	-	4.6	-0.7	1	PF13893,PF00076,PF11835	7	P26599|PTBP1|143|16179478|RBPDB;P26599|PTBP1|994|16431980|SpliceAid-F,P26599|PTBP1|1002|16260624|SpliceAid-F	13	0.804208
P10881	ENSBTAG00000008716	SSB	novel.circ.000848	1-70	-	8.37	-0.7	1	PF08777,PF05383,PF00076	3	P05455|SSB|58|11342556|RBPDB,P05455|SSB|457|16387655|PDB	2	0.804042
Q0IIG6	ENSBTAG00000000435	TARBP2	novel.circ.004320	282-343	-	5.68	-0.7	1	PF00035	2	Q15633|TARBP2|starBase_1|25043050|HITS-CLIP,Q15633|TARBP2|starBase_4|25043050|HITS-CLIP;Q15633|TARBP2|starBase_5|25043050|HITS-CLIP	2	0.804
Q5EA53	ENSBTAG00000021016	GTF2F1	novel.circ.002834	4475-5032	-	87.54	-0.7	1	PF05793	1	P35269|GTF2F1|K562.GTF2F1.1.466|31226278|eCLIP_ENCODE,P35269|GTF2F1|HepG2.GTF2F1.1.345|31226278|eCLIP_ENCODE	7	0.804
Q2HJ60	ENSBTAG00000005726	HNRNPA2B1	novel.circ.000016	1501-1802	-	45.67	-0.7	1	PF00076	2	P22626|HNRNPA2B1|707|11024030|SpliceAid-F,P22626|HNRNPA2B1|708|16548521|SpliceAid-F,P22626|HNRNPA2B1|705|11024030|SpliceAid-F,P22626|HNRNPA2B1|125|12415010|RBPD	2	0.803958
Q8WN55	ENSBTAG00000045828	PTBP1	novel.circ.000259	234-285	-	2.49	-0.7	1	PF13893,PF00076,PF11835	7	P26599|PTBP1|143|16179478|RBPDB	2	0.803958
A6QQL9	ENSBTAG00000014353	SRP14	novel.circ.000928	3241-3962	-	114.08	-0.71	1	PF02290	1	P37108|SRP14|445|11089964|PDB,P37108|SRP14|342|11089964|PDB	3	0.803917
Q3T127	ENSBTAG00000023610	U2AF1L4	novel.circ.001229	5854-177	back-splicing_junction	35.19	-0.71	1	PF00642,PF00076	3	Q01081|U2AF1|K562.U2AF1.6.335|31226278|eCLIP_ENCODE,Q01081|U2AF1|HepG2.U2AF1.5.461|31226278|eCLIP_ENCODE	3	0.803917
A6QR44	ENSBTAG00000019869	DGCR8	novel.circ.000928	10443-11164	-	113.98	-0.71	1	PF00035	2	Q8WYQ5|DGCR8|K562.DGCR8.1.60|31226278|eCLIP_ENCODE	2	0.803833
P10881	ENSBTAG00000008716	SSB	novel.circ.002867	1214-1415	-	29.18	-0.71	1	PF08777,PF05383,PF00076	3	P05455|SSB|58|11342556|RBPDB,P05455|SSB|457|16387655|PDB	2	0.803708
Q8WN55	ENSBTAG00000045828	PTBP1	novel.circ.001549	1376-14	back-splicing_junction	5.46	-0.72	1	PF13893,PF00076,PF11835	7	P26599|PTBP1|143|16179478|RBPDB	6	0.8035
Q3MHR5	ENSBTAG00000018258	SRSF2	novel.circ.003305	651-702	-	3.03	-0.72	1	PF00076	1	Q01130|SRSF2|s56|10094314|SpliceAid-F,Q01130|SRSF2|439|22002536|PDB,Q01130|SRSF2|M274_0.6|7543047|cisBP-RNA,Q01130|SRSF2|s47|7543047|SpliceAid-F,Q01130|SRSF2|380|31724725|NA;Q01130|SRSF2|s52|10629063|SpliceAid-F,Q01130|SRSF2|381|31724725|RBNS_ENCODE,Q01130|SRSF2|1311|11825891|AEDB	2	0.803417
Q3T122	ENSBTAG00000001988	EIF3D	novel.circ.002584	401-452	-	3.01	-0.72	1	PF05091	1	O15371|EIF3D|HepG2.EIF3D.9.59|31226278|eCLIP_ENCODE;O15371|EIF3D|HepG2.EIF3D.0.116|31226278|eCLIP_ENCODE	2	0.803375
Q9XSJ0	ENSBTAG00000013620	UCHL5	novel.circ.000685	723-800	-	9.3	-0.72	1	PF01088,PF18031	2	Q9Y5K5|UCHL5|K562.UCHL5.6.175|31226278|eCLIP_ENCODE	3	0.803333
Q3T127	ENSBTAG00000023610	U2AF1L4	novel.circ.003752	1420-1617	-	30.15	-0.72	1	PF00642,PF00076	3	Q01081|U2AF1|K562.U2AF1.1.191|31226278|eCLIP_ENCODE;Q01081|U2AF1|K562.U2AF1.2.166|31226278|eCLIP_ENCODE	2	0.803167
Q0IIG6	ENSBTAG00000000435	TARBP2	novel.circ.001043	12581-13106	-	81.33	-0.72	1	PF00035	2	Q15633|TARBP2|starBase_2|25043050|HITS-CLIP,Q15633|TARBP2|starBase_6|25043050|HITS-CLIP,Q15633|TARBP2|starBase_3|25043050|HITS-CLIP;Q15633|TARBP2|starBase_1|25043050|HITS-CLIP,Q15633|TARBP2|starBase_4|25043050|HITS-CLIP	3	0.803125
Q0IIG6	ENSBTAG00000000435	TARBP2	novel.circ.000597	343-394	-	4.06	-0.73	1	PF00035	2	Q15633|TARBP2|starBase_5|25043050|HITS-CLIP;Q15633|TARBP2|starBase_1|25043050|HITS-CLIP,Q15633|TARBP2|starBase_4|25043050|HITS-CLIP	2	0.802917
Q8WN55	ENSBTAG00000045828	PTBP1	novel.circ.000928	3241-3962	-	112.53	-0.74	1	PF13893,PF00076,PF11835	7	P26599|PTBP1|143|16179478|RBPDB;P26599|PTBP1|994|16431980|SpliceAid-F,P26599|PTBP1|1002|16260624|SpliceAid-F;P26599|PTBP1|996|17548433|SpliceAid-F,P26599|PTBP1|1368|9858533|AEDB,P26599|PTBP1|995|9858533|SpliceAid-F,P26599|PTBP1|s100|19561594|SpliceAid-F,P26599|PTBP1|M227_0.6|238|NA;P26599|PTBP1|1314|9826658|AEDB;P26599|PTBP1|993|16431980|SpliceAid-F	176	0.802667
P10881	ENSBTAG00000008716	SSB	novel.circ.001043	12315-12840	-	80.84	-0.74	1	PF08777,PF05383,PF00076	3	P05455|SSB|58|11342556|RBPDB,P05455|SSB|457|16387655|PDB	5	0.802625
A1A4K8	ENSBTAG00000011645	U2AF1	novel.circ.002867	1-202	-	28.51	-0.74	1	PF00642,PF00076	3	Q01081|U2AF1|HepG2.U2AF1.0.228|31226278|eCLIP_ENCODE,Q01081|U2AF1|K562.U2AF1.4.144|31226278|eCLIP_ENCODE;Q01081|U2AF1|K562.U2AF1.6.335|31226278|eCLIP_ENCODE,Q01081|U2AF1|HepG2.U2AF1.5.461|31226278|eCLIP_ENCODE;Q01081|U2AF1|K562.U2AF1.1.191|31226278|eCLIP_ENCODE	10	0.802542
Q3SZR8	ENSBTAG00000040006	SRSF3	novel.circ.001853	226-277	-	0.45	-0.74	1	PF00076	1	P84103|SRSF3|UGGAC|26876937|PAR-CLIP;P84103|SRSF3|s41|10094314|SpliceAid-F,P84103|SRSF3|1249|17036044|SpliceAid-F,P84103|SRSF3|1251|17036044|SpliceAid-F,P84103|SRSF3|starBase_1|26876937|PAR-CLIP,P84103|SRSF3|NA|NA|NA	3	0.8025
Q3T122	ENSBTAG00000001988	EIF3D	novel.circ.003284	851-902	-	2.99	-0.74	1	PF05091	1	O15371|EIF3D|HepG2.EIF3D.7.86|31226278|eCLIP_ENCODE,O15371|EIF3D|HepG2.EIF3D.3.107|31226278|eCLIP_ENCODE;O15371|EIF3D|HepG2.EIF3D.0.116|31226278|eCLIP_ENCODE	2	0.802458
Q8WN55	ENSBTAG00000045828	PTBP1	novel.circ.000597	318-369	-	3.84	-0.74	1	PF13893,PF00076,PF11835	7	P26599|PTBP1|143|16179478|RBPDB	7	0.802417
Q8WN55	ENSBTAG00000045828	PTBP1	novel.circ.003355	676-727	-	3.78	-0.74	1	PF13893,PF00076,PF11835	7	P26599|PTBP1|143|16179478|RBPDB;P26599|PTBP1|996|17548433|SpliceAid-F,P26599|PTBP1|1368|9858533|AEDB,P26599|PTBP1|995|9858533|SpliceAid-F,P26599|PTBP1|s100|19561594|SpliceAid-F,P26599|PTBP1|M227_0.6|238|NA	12	0.802292
Q0VCZ3	ENSBTAG00000015771	YTHDF2	novel.circ.002262	201-252	-	2.53	-0.75	1	PF04146	1	Q9Y5A9|YTHDF2|DRACH|27602518|iCLIP	2	0.802208
Q8WN55	ENSBTAG00000045828	PTBP1	novel.circ.004326	1983-2114	-	16.29	-0.75	1	PF13893,PF00076,PF11835	7	P26599|PTBP1|143|16179478|RBPDB;P26599|PTBP1|1314|9826658|AEDB	20	0.802125
Q3T122	ENSBTAG00000001988	EIF3D	novel.circ.001243	28-79	-	1.72	-0.75	1	PF05091	1	O15371|EIF3D|HepG2.EIF3D.8.93|31226278|eCLIP_ENCODE	2	0.802083
Q0VCZ3	ENSBTAG00000015771	YTHDF2	novel.circ.003130	1225-1294	-	7.54	-0.75	1	PF04146	1	Q9Y5A9|YTHDF2|DRACH|27602518|iCLIP	2	0.802083
Q0IIG6	ENSBTAG00000000435	TARBP2	novel.circ.000408	93-144	-	2.45	-0.75	1	PF00035	2	Q15633|TARBP2|starBase_2|25043050|HITS-CLIP,Q15633|TARBP2|starBase_6|25043050|HITS-CLIP,Q15633|TARBP2|starBase_3|25043050|HITS-CLIP;Q15633|TARBP2|starBase_5|25043050|HITS-CLIP	2	0.802
Q3T122	ENSBTAG00000001988	EIF3D	novel.circ.001814	816-867	-	2.78	-0.75	1	PF05091	1	O15371|EIF3D|HepG2.EIF3D.0.116|31226278|eCLIP_ENCODE	2	0.801958
Q8WN55	ENSBTAG00000045828	PTBP1	novel.circ.000016	1051-1352	-	44.25	-0.75	1	PF13893,PF00076,PF11835	7	P26599|PTBP1|143|16179478|RBPDB;P26599|PTBP1|993|16431980|SpliceAid-F;P26599|PTBP1|996|17548433|SpliceAid-F,P26599|PTBP1|1368|9858533|AEDB,P26599|PTBP1|995|9858533|SpliceAid-F,P26599|PTBP1|s100|19561594|SpliceAid-F,P26599|PTBP1|M227_0.6|238|NA;P26599|PTBP1|994|16431980|SpliceAid-F,P26599|PTBP1|1002|16260624|SpliceAid-F;P26599|PTBP1|1314|9826658|AEDB	73	0.801958
Q8WN55	ENSBTAG00000045828	PTBP1	novel.circ.003130	1293-1362	-	7.48	-0.75	1	PF13893,PF00076,PF11835	7	P26599|PTBP1|143|16179478|RBPDB;P26599|PTBP1|994|16431980|SpliceAid-F,P26599|PTBP1|1002|16260624|SpliceAid-F	12	0.801958
Q1RMJ7	ENSBTAG00000010393	TRNAU1AP	novel.circ.000928	3241-3962	-	111.07	-0.76	1	PF17654,PF00076	3	Q9NX07|TRNAU1AP|427|31724725|RBNS_ENCODE,Q9NX07|TRNAU1AP|428|31724725|RBNS_ENCODE	5	0.8015
Q8WN55	ENSBTAG00000045828	PTBP1	novel.circ.002876	1-76	-	8.53	-0.76	1	PF13893,PF00076,PF11835	7	P26599|PTBP1|143|16179478|RBPDB;P26599|PTBP1|1314|9826658|AEDB;P26599|PTBP1|994|16431980|SpliceAid-F,P26599|PTBP1|1002|16260624|SpliceAid-F	9	0.8015
Q5EA53	ENSBTAG00000021016	GTF2F1	novel.circ.002867	1214-1415	-	27.78	-0.77	1	PF05793	1	P35269|GTF2F1|K562.GTF2F1.1.466|31226278|eCLIP_ENCODE,P35269|GTF2F1|HepG2.GTF2F1.1.345|31226278|eCLIP_ENCODE	2	0.801333
Q0VCZ3	ENSBTAG00000015771	YTHDF2	novel.circ.002965	312-377	-	5.66	-0.77	1	PF04146	1	Q9Y5A9|YTHDF2|DRACH|27602518|iCLIP	4	0.801167
Q3SZR8	ENSBTAG00000040006	SRSF3	novel.circ.001344	1301-1356	-	3.28	-0.77	1	PF00076	1	P84103|SRSF3|s41|10094314|SpliceAid-F,P84103|SRSF3|1249|17036044|SpliceAid-F,P84103|SRSF3|1251|17036044|SpliceAid-F,P84103|SRSF3|starBase_1|26876937|PAR-CLIP,P84103|SRSF3|NA|NA|NA;P84103|SRSF3|UGGAC|26876937|PAR-CLIP	5	0.801083
Q0VCZ3	ENSBTAG00000015771	YTHDF2	novel.circ.000227	103-172	-	7.1	-0.78	1	PF04146	1	Q9Y5A9|YTHDF2|DRACH|27602518|iCLIP	4	0.801042
Q3SZI4	ENSBTAG00000002108	YWHAQ	novel.circ.004326	1626-1757	-	15.75	-0.78	1	PF00244	1	P61981|YWHAG|K562.YWHAG.1.41|31226278|eCLIP_ENCODE	2	0.800958
Q3T122	ENSBTAG00000001988	EIF3D	novel.circ.001245	801-852	-	2.77	-0.78	1	PF05091	1	O15371|EIF3D|HepG2.EIF3D.8.93|31226278|eCLIP_ENCODE;O15371|EIF3D|HepG2.EIF3D.0.116|31226278|eCLIP_ENCODE	4	0.800958
Q8WN55	ENSBTAG00000045828	PTBP1	novel.circ.001344	325-380	-	3.21	-0.78	1	PF13893,PF00076,PF11835	7	P26599|PTBP1|143|16179478|RBPDB	7	0.800958
Q8WN55	ENSBTAG00000045828	PTBP1	novel.circ.001900	1037-1094	-	4.3	-0.78	1	PF13893,PF00076,PF11835	7	P26599|PTBP1|143|16179478|RBPDB;P26599|PTBP1|994|16431980|SpliceAid-F,P26599|PTBP1|1002|16260624|SpliceAid-F;P26599|PTBP1|993|16431980|SpliceAid-F	9	0.800833
Q0IIG6	ENSBTAG00000000435	TARBP2	novel.circ.004326	1983-2114	-	15.56	-0.79	1	PF00035	2	Q15633|TARBP2|starBase_2|25043050|HITS-CLIP,Q15633|TARBP2|starBase_6|25043050|HITS-CLIP,Q15633|TARBP2|starBase_3|25043050|HITS-CLIP;Q15633|TARBP2|starBase_1|25043050|HITS-CLIP,Q15633|TARBP2|starBase_4|25043050|HITS-CLIP	4	0.800583
Q1LZB6	ENSBTAG00000016744	CAPRIN1	novel.circ.000016	6001-6302	-	43.25	-0.79	1	PF12287,PF18293	2	Q14444|CAPRIN1|WWWUAAAW|24393468|PAR-CLIP,Q14444|CAPRIN1|TWWAAATWW|24393468|PAR-CLIP	3	0.800583
Q1LZB6	ENSBTAG00000016744	CAPRIN1	novel.circ.002834	4449-5006	-	83.93	-0.79	1	PF12287,PF18293	2	Q14444|CAPRIN1|WWWUAAAW|24393468|PAR-CLIP,Q14444|CAPRIN1|TWWAAATWW|24393468|PAR-CLIP	10	0.8005
Q5E9J1	ENSBTAG00000008853	HNRNPF	novel.circ.002867	2901-3102	-	27.15	-0.79	1	PF00076,PF08080	3	P52597|HNRNPF|gugkau|22574288|RBPMap,P52597|HNRNPF|815|19506027|SpliceAid-F,P52597|HNRNPF|1331|12612063|AEDB,P52597|HNRNPF|817|12612063|SpliceAid-F,P52597|HNRNPF|836|NA|NA	6	0.80025
Q3MHX3	ENSBTAG00000031688	RBM4	novel.circ.003752	1420-1617	-	28.23	-0.8	1	PF00076,PF13893,PF00098	4	Q9BWF3|RBM4|1146|16260624|SpliceAid-F,Q9BWF3|RBM4|1145|16777844|SpliceAid-F,Q9BWF3|RBM4|1147|21518792|SpliceAid-F	2	0.800208
Q5E9J1	ENSBTAG00000008853	HNRNPF	novel.circ.002876	306-381	-	7.94	-0.8	1	PF00076,PF08080	3	P52597|HNRNPF|gugkau|22574288|RBPMap,P52597|HNRNPF|815|19506027|SpliceAid-F,P52597|HNRNPF|1331|12612063|AEDB,P52597|HNRNPF|817|12612063|SpliceAid-F,P52597|HNRNPF|836|NA|NA	3	0.800083
Q1JQD2	ENSBTAG00000000080	GRWD1	novel.circ.002876	306-381	-	7.91	-0.8	1	PF00400,PF12265	3	Q9BQ67|GRWD1|HepG2.GRWD1.8.169|31226278|eCLIP_ENCODE;Q9BQ67|GRWD1|HepG2.GRWD1.6.332|31226278|eCLIP_ENCODE,Q9BQ67|GRWD1|HepG2.GRWD1.2.313|31226278|eCLIP_ENCODE	5	0.800042
Q1RMJ7	ENSBTAG00000010393	TRNAU1AP	novel.circ.002867	1-202	-	26.88	-0.8	1	PF17654,PF00076	3	Q9NX07|TRNAU1AP|427|31724725|RBNS_ENCODE,Q9NX07|TRNAU1AP|428|31724725|RBNS_ENCODE	4	0.799792
Q3ZBG7	ENSBTAG00000012803	SRP19	novel.circ.003752	1373-1570	-	27.98	-0.8	1	PF01922	1	P09132|SRP19|547|20179341|PDB	3	0.799792
Q3MHR5	ENSBTAG00000018258	SRSF2	novel.circ.003951	201-252	-	1.41	-0.81	1	PF00076	1	Q01130|SRSF2|1172|19843576|SpliceAid-F,Q01130|SRSF2|1168|11779509|SpliceAid-F	2	0.799458
Q5E988	ENSBTAG00000015989	RPS5	novel.circ.000016	3901-4202	-	42.34	-0.82	1	PF00177	1	P46782|RPS5|K562.RPS5.1.215|31226278|eCLIP_ENCODE;P46782|RPS5|HepG2.RPS5.1.119|31226278|eCLIP_ENCODE	2	0.799292
Q3MHR5	ENSBTAG00000018258	SRSF2	novel.circ.003199	197-248	-	1.56	-0.82	1	PF00076	1	Q01130|SRSF2|1380|15247216|AEDB,Q01130|SRSF2|502|22002536|PDB,Q01130|SRSF2|1179|12612063|SpliceAid-F,Q01130|SRSF2|1182|9848651|SpliceAid-F,Q01130|SRSF2|1171|16990281|Spli	2	0.799083
Q2KIR1	ENSBTAG00000009077	SNRPA	novel.circ.002876	306-381	-	7.35	-0.83	1	PF00076	2	P09012|SNRPA|M348_0.6|10094314|cisBP-RNA,P09012|SNRPA|M347_0.6|10094314|cisBP-RNA	2	0.798667
Q2T9U1	ENSBTAG00000019085	SRP54	novel.circ.002834	1947-2504	-	81.9	-0.84	1	PF00448,PF02978,PF02881,PF02492	4	P61011|SRP54|456|12244299|PDB	4	0.798542
Q8WN55	ENSBTAG00000045828	PTBP1	novel.circ.001300	268-357	-	9.33	-0.84	1	PF13893,PF00076,PF11835	7	P26599|PTBP1|143|16179478|RBPDB;P26599|PTBP1|994|16431980|SpliceAid-F,P26599|PTBP1|1002|16260624|SpliceAid-F;P26599|PTBP1|996|17548433|SpliceAid-F,P26599|PTBP1|1368|9858533|AEDB,P26599|PTBP1|995|9858533|SpliceAid-F,P26599|PTBP1|s100|19561594|SpliceAid-F,P26599|PTBP1|M227_0.6|238|NA	27	0.798417
Q3MHR5	ENSBTAG00000018258	SRSF2	novel.circ.003355	1-52	-	2.1	-0.84	1	PF00076	1	Q01130|SRSF2|1380|15247216|AEDB,Q01130|SRSF2|502|22002536|PDB,Q01130|SRSF2|1179|12612063|SpliceAid-F,Q01130|SRSF2|1182|9848651|SpliceAid-F,Q01130|SRSF2|1171|16990281|Spli;Q01130|SRSF2|s52|10629063|SpliceAid-F,Q01130|SRSF2|381|31724725|RBNS_ENCODE,Q01130|SRSF2|1311|11825891|AEDB	2	0.798333
Q3T127	ENSBTAG00000023610	U2AF1L4	novel.circ.002867	1-202	-	25.88	-0.84	1	PF00642,PF00076	3	Q01081|U2AF1|HepG2.U2AF1.0.228|31226278|eCLIP_ENCODE,Q01081|U2AF1|K562.U2AF1.4.144|31226278|eCLIP_ENCODE;Q01081|U2AF1|K562.U2AF1.6.335|31226278|eCLIP_ENCODE,Q01081|U2AF1|HepG2.U2AF1.5.461|31226278|eCLIP_ENCODE;Q01081|U2AF1|K562.U2AF1.1.191|31226278|eCLIP_ENCODE	10	0.798125
P63103	ENSBTAG00000000236	YWHAZ	novel.circ.004326	1626-1757	-	14.33	-0.85	1	PF00244	1	P61981|YWHAG|K562.YWHAG.1.41|31226278|eCLIP_ENCODE	2	0.797958
P61286	ENSBTAG00000046358	PABPC1	novel.circ.000928	9361-10082	-	106.13	-0.86	1	PF00076,PF00658	5	P11940|PABPC1|416|10499800|PDB,P11940|PABPC1|452|10499800|PDB,P11940|PABPC1|480|23041282|PDB	16	0.7975
Q3T122	ENSBTAG00000001988	EIF3D	novel.circ.002965	88-153	-	4.01	-0.86	1	PF05091	1	O15371|EIF3D|HepG2.EIF3D.9.59|31226278|eCLIP_ENCODE;O15371|EIF3D|HepG2.EIF3D.0.116|31226278|eCLIP_ENCODE;O15371|EIF3D|HepG2.EIF3D.8.93|31226278|eCLIP_ENCODE	3	0.797333
Q3MHR5	ENSBTAG00000018258	SRSF2	novel.circ.002965	824-889	-	4	-0.86	1	PF00076	1	Q01130|SRSF2|1380|15247216|AEDB,Q01130|SRSF2|502|22002536|PDB,Q01130|SRSF2|1179|12612063|SpliceAid-F,Q01130|SRSF2|1182|9848651|SpliceAid-F,Q01130|SRSF2|1171|16990281|Spli	3	0.797333
Q3SZR8	ENSBTAG00000040006	SRSF3	novel.circ.000259	601-652	-	-0.28	-0.87	1	PF00076	1	P84103|SRSF3|s41|10094314|SpliceAid-F,P84103|SRSF3|1249|17036044|SpliceAid-F,P84103|SRSF3|1251|17036044|SpliceAid-F,P84103|SRSF3|starBase_1|26876937|PAR-CLIP,P84103|SRSF3|NA|NA|NA;P84103|SRSF3|UGGAC|26876937|PAR-CLIP	3	0.797208
Q3MHR5	ENSBTAG00000018258	SRSF2	novel.circ.000227	409-478	-	5.4	-0.87	1	PF00076	1	Q01130|SRSF2|1348|9858550|AEDB,Q01130|SRSF2|1176|9858550|SpliceAid-F,Q01130|SRSF2|ugcygyy|19296853|RBPMap,Q01130|SRSF2|s37|10022858|SpliceAid-F	2	0.797
Q8WN55	ENSBTAG00000045828	PTBP1	novel.circ.000685	305-382	-	6.64	-0.87	1	PF13893,PF00076,PF11835	7	P26599|PTBP1|143|16179478|RBPDB	16	0.797
Q3ZBG7	ENSBTAG00000012803	SRP19	novel.circ.000016	4801-5102	-	40.67	-0.87	1	PF01922	1	P09132|SRP19|547|20179341|PDB	5	0.796958
Q2KIV0	ENSBTAG00000051118	NOL12	novel.circ.003752	1420-1617	-	26.09	-0.88	1	PF09805	1	Q9UGY1|NOL12|HepG2.NOL12.2.48|31226278|eCLIP_ENCODE;Q9UGY1|NOL12|HepG2.NOL12.9.52|31226278|eCLIP_ENCODE	4	0.796875
Q0IIG6	ENSBTAG00000000435	TARBP2	novel.circ.000685	305-382	-	6.53	-0.88	1	PF00035	2	Q15633|TARBP2|starBase_2|25043050|HITS-CLIP,Q15633|TARBP2|starBase_6|25043050|HITS-CLIP,Q15633|TARBP2|starBase_3|25043050|HITS-CLIP	2	0.796708
Q0IIG6	ENSBTAG00000000435	TARBP2	novel.circ.001300	268-357	-	8.59	-0.88	1	PF00035	2	Q15633|TARBP2|starBase_2|25043050|HITS-CLIP,Q15633|TARBP2|starBase_6|25043050|HITS-CLIP,Q15633|TARBP2|starBase_3|25043050|HITS-CLIP;Q15633|TARBP2|starBase_5|25043050|HITS-CLIP	2	0.796667
Q3ZBG7	ENSBTAG00000012803	SRP19	novel.circ.002867	1314-1515	-	24.97	-0.88	1	PF01922	1	P09132|SRP19|547|20179341|PDB	5	0.796583
Q2HJ60	ENSBTAG00000005726	HNRNPA2B1	novel.circ.000928	3241-3962	-	104.58	-0.89	1	PF00076	2	P22626|HNRNPA2B1|699|12833158|SpliceAid-F,P22626|HNRNPA2B1|gguaguag|22574288|RBPMap,P22626|HNRNPA2B1|711|24452013|SpliceAid-F,P22626|HNRNPA2B1|UAGG|27773581|iCL;P22626|HNRNPA2B1|707|11024030|SpliceAid-F,P22626|HNRNPA2B1|708|16548521|SpliceAid-F,P22626|HNRNPA2B1|705|11024030|SpliceAid-F,P22626|HNRNPA2B1|125|12415010|RBPD;P22626|HNRNPA2B1|701|12426391|SpliceAid-F,P22626|HNRNPA2B1|710|24452013|Splic…	6	0.79625
Q0VCZ3	ENSBTAG00000015771	YTHDF2	novel.circ.004326	1626-1757	-	13.53	-0.89	1	PF04146	1	Q9Y5A9|YTHDF2|DRACH|27602518|iCLIP	8	0.79625
Q3T122	ENSBTAG00000001988	EIF3D	novel.circ.000227	409-478	-	4.98	-0.9	1	PF05091	1	O15371|EIF3D|HepG2.EIF3D.7.86|31226278|eCLIP_ENCODE,O15371|EIF3D|HepG2.EIF3D.3.107|31226278|eCLIP_ENCODE	2	0.796
Q3ZBG7	ENSBTAG00000012803	SRP19	novel.circ.000928	723-1444	-	104.08	-0.9	1	PF01922	1	P09132|SRP19|547|20179341|PDB	32	0.795875
Q5E9J1	ENSBTAG00000008853	HNRNPF	novel.circ.003752	1420-1617	-	25.28	-0.9	1	PF00076,PF08080	3	P52597|HNRNPF|gukgykg|22574288|RBPMap;P52597|HNRNPF|gugkau|22574288|RBPMap,P52597|HNRNPF|815|19506027|SpliceAid-F,P52597|HNRNPF|1331|12612063|AEDB,P52597|HNRNPF|817|12612063|SpliceAid-F,P52597|HNRNPF|836|NA|NA	2	0.795625
Q3MHR5	ENSBTAG00000018258	SRSF2	novel.circ.003130	1293-1362	-	4.72	-0.91	1	PF00076	1	Q01130|SRSF2|1173|19843576|SpliceAid-F,Q01130|SRSF2|1334|11967553|AEDB,Q01130|SRSF2|gryymcyr|19296853|RBPMap;Q01130|SRSF2|1172|19843576|SpliceAid-F,Q01130|SRSF2|1168|11779509|SpliceAid-F	2	0.795375
Q8WN55	ENSBTAG00000045828	PTBP1	novel.circ.002834	4475-5032	-	78.42	-0.92	1	PF13893,PF00076,PF11835	7	P26599|PTBP1|143|16179478|RBPDB;P26599|PTBP1|996|17548433|SpliceAid-F,P26599|PTBP1|1368|9858533|AEDB,P26599|PTBP1|995|9858533|SpliceAid-F,P26599|PTBP1|s100|19561594|SpliceAid-F,P26599|PTBP1|M227_0.6|238|NA;P26599|PTBP1|994|16431980|SpliceAid-F,P26599|PTBP1|1002|16260624|SpliceAid-F	70	0.795167
Q0IIG6	ENSBTAG00000000435	TARBP2	novel.circ.002876	1-76	-	5.66	-0.93	1	PF00035	2	Q15633|TARBP2|starBase_2|25043050|HITS-CLIP,Q15633|TARBP2|starBase_6|25043050|HITS-CLIP,Q15633|TARBP2|starBase_3|25043050|HITS-CLIP	3	0.794625
Q3MHR5	ENSBTAG00000018258	SRSF2	novel.circ.001900	1289-1346	-	1.47	-0.94	1	PF00076	1	Q01130|SRSF2|1380|15247216|AEDB,Q01130|SRSF2|502|22002536|PDB,Q01130|SRSF2|1179|12612063|SpliceAid-F,Q01130|SRSF2|1182|9848651|SpliceAid-F,Q01130|SRSF2|1171|16990281|Spli	3	0.794375
P67808	ENSBTAG00000017368	YBX1	novel.circ.002834	4475-5032	-	77.48	-0.94	1	PF00313	1	P67809|YBX1|124|15798215|RBPDB;P67809|YBX1|1293|18503770|SpliceAid-F,P67809|YBX1|1321|19273129|AEDB,P67809|YBX1|1290|11447123|SpliceAid-F,P67809|YBX1|1339|11447123|AEDB,P67809|YBX1|1291|11447123|SpliceAid-F	4	0.794292
P68509	ENSBTAG00000031134	YWHAH	novel.circ.004326	1171-1302	-	12.58	-0.94	1	PF00244	1	P61981|YWHAG|K562.YWHAG.1.41|31226278|eCLIP_ENCODE	2	0.79425
Q5E9J1	ENSBTAG00000008853	HNRNPF	novel.circ.001229	1771-2008	-	28.97	-0.94	1	PF00076,PF08080	3	P52597|HNRNPF|gugkau|22574288|RBPMap,P52597|HNRNPF|815|19506027|SpliceAid-F,P52597|HNRNPF|1331|12612063|AEDB,P52597|HNRNPF|817|12612063|SpliceAid-F,P52597|HNRNPF|836|NA|NA;P52597|HNRNPF|gukgykg|22574288|RBPMap	7	0.794167
Q3ZBJ1	ENSBTAG00000008873	NCBP2	novel.circ.000016	1501-1802	-	38.02	-0.96	1	PF00076	1	P52298|NCBP2|HepG2.NCBP2.5.83|31226278|eCLIP_ENCODE;P52298|NCBP2|K562.NCBP2.0.66|31226278|eCLIP_ENCODE	7	0.793292
Q2KIR1	ENSBTAG00000009077	SNRPA	novel.circ.000928	3241-3962	-	100.67	-0.96	1	PF00076	2	P09012|SNRPA|M348_0.6|10094314|cisBP-RNA,P09012|SNRPA|M347_0.6|10094314|cisBP-RNA;P09012|SNRPA|M345_0.6|10094314|cisBP-RNA,P09012|SNRPA|M346_0.6|10094314|cisBP-RNA	5	0.793125
Q3SZR8	ENSBTAG00000040006	SRSF3	novel.circ.002466	153-204	-	-4.14	-0.97	1	PF00076	1	P84103|SRSF3|UGGAC|26876937|PAR-CLIP;P84103|SRSF3|s41|10094314|SpliceAid-F,P84103|SRSF3|1249|17036044|SpliceAid-F,P84103|SRSF3|1251|17036044|SpliceAid-F,P84103|SRSF3|starBase_1|26876937|PAR-CLIP,P84103|SRSF3|NA|NA|NA	3	0.793083
Q5EA53	ENSBTAG00000021016	GTF2F1	novel.circ.002368	258-309	-	-3.31	-0.97	1	PF05793	1	P35269|GTF2F1|K562.GTF2F1.1.466|31226278|eCLIP_ENCODE,P35269|GTF2F1|HepG2.GTF2F1.1.345|31226278|eCLIP_ENCODE	4	0.79275
Q5E9J1	ENSBTAG00000008853	HNRNPF	novel.circ.000928	3241-3962	-	100.19	-0.98	1	PF00076,PF08080	3	P52597|HNRNPF|gugkau|22574288|RBPMap,P52597|HNRNPF|815|19506027|SpliceAid-F,P52597|HNRNPF|1331|12612063|AEDB,P52597|HNRNPF|817|12612063|SpliceAid-F,P52597|HNRNPF|836|NA|NA;P52597|HNRNPF|gukgykg|22574288|RBPMap	47	0.792708
Q2KIV0	ENSBTAG00000051118	NOL12	novel.circ.001243	578-629	-	-2.12	-0.98	1	PF09805	1	Q9UGY1|NOL12|HepG2.NOL12.9.52|31226278|eCLIP_ENCODE	2	0.792708
Q1JQD2	ENSBTAG00000000080	GRWD1	novel.circ.003752	1420-1617	-	23.34	-0.98	1	PF00400,PF12265	3	Q9BQ67|GRWD1|HepG2.GRWD1.8.169|31226278|eCLIP_ENCODE;Q9BQ67|GRWD1|HepG2.GRWD1.6.332|31226278|eCLIP_ENCODE,Q9BQ67|GRWD1|HepG2.GRWD1.2.313|31226278|eCLIP_ENCODE	3	0.792583
Q3MHX3	ENSBTAG00000031688	RBM4	novel.circ.000928	3241-3962	-	100.03	-0.98	1	PF00076,PF13893,PF00098	4	Q9BWF3|RBM4|278|31724725|RBNS_ENCODE,Q9BWF3|RBM4|gcgcgss|19561594|RBPMap,Q9BWF3|RBM4|s102|19561594|SpliceAid-F;Q9BWF3|RBM4|1146|16260624|SpliceAid-F,Q9BWF3|RBM4|1145|16777844|SpliceAid-F,Q9BWF3|RBM4|1147|21518792|SpliceAid-F	5	0.792583
Q3T0Q6	ENSBTAG00000012159	CNBP	novel.circ.001043	12315-12840	-	70.36	-0.99	1	PF00098	7	P62633|CNBP|UGGAGNW|28329689|PAR-CLIP,P62633|CNBP||NA|NA;P62633|CNBP||NA|NA	11	0.792125
Q2KIR1	ENSBTAG00000009077	SNRPA	novel.circ.000016	1501-1802	-	37.09	-0.99	1	PF00076	2	P09012|SNRPA|M345_0.6|10094314|cisBP-RNA,P09012|SNRPA|M346_0.6|10094314|cisBP-RNA;P09012|SNRPA|M348_0.6|10094314|cisBP-RNA,P09012|SNRPA|M347_0.6|10094314|cisBP-RNA	5	0.791958
Q3ZBV2	ENSBTAG00000003570	DDX19A	novel.circ.002867	4964-150	back-splicing_junction	22.23	-0.99	1	PF00270,PF00271	2	Q9UMR2|DDX19B|554|19219046|PDB,Q9UMR2|DDX19B|332|19244245|PDB	13	0.791917
Q1RMU5	ENSBTAG00000006330	RBM5	novel.circ.000246	101-152	-	60.49	2.99	1	PF01585,PF17780,PF00076,PF00641,PF12656	5	P52756|RBM5|1148|18840686|SpliceAid-F,P52756|RBM5|UCAUC|24332178|HITS-CLIP	1	0.791417
Q1RMU5	ENSBTAG00000006330	RBM5	novel.circ.001945	151-202	-	70.49	2.99	1	PF01585,PF17780,PF00076,PF00641,PF12656	5	P52756|RBM5|1148|18840686|SpliceAid-F,P52756|RBM5|UCAUC|24332178|HITS-CLIP	1	0.791333
Q1JQD2	ENSBTAG00000000080	GRWD1	novel.circ.002867	1-202	-	21.79	-1.01	1	PF00400,PF12265	3	Q9BQ67|GRWD1|HepG2.GRWD1.6.332|31226278|eCLIP_ENCODE,Q9BQ67|GRWD1|HepG2.GRWD1.2.313|31226278|eCLIP_ENCODE;Q9BQ67|GRWD1|HepG2.GRWD1.8.169|31226278|eCLIP_ENCODE	2	0.791208
Q1RMU5	ENSBTAG00000006330	RBM5	novel.circ.000696	176-227	-	60.26	2.98	1	PF01585,PF17780,PF00076,PF00641,PF12656	5	P52756|RBM5|1148|18840686|SpliceAid-F,P52756|RBM5|UCAUC|24332178|HITS-CLIP	1	0.790833
Q1RMU5	ENSBTAG00000006330	RBM5	novel.circ.003355	308-359	-	70.04	2.97	1	PF01585,PF17780,PF00076,PF00641,PF12656	5	P52756|RBM5|1152|22162216|SpliceAid-F,P52756|RBM5||NA|NA	1	0.790583
Q3T0I4	ENSBTAG00000008498	ALYREF	novel.circ.000928	12241-12962	-	97.09	-1.03	1	PF00076,PF13865	2	Q86V81|ALYREF|CUUCG|28934468|iCLIP	8	0.790208
Q0V898	ENSBTAG00000007453	NELFE	novel.circ.002834	1947-2504	-	73.11	-1.04	1	PF00076	1	P18615|NELFE|122|18303858|RBPDB,P18615|NELFE|6|18303858|RBPDB;P18615|NELFE|21|18303858|RBPDB	4	0.790042
Q1RMU5	ENSBTAG00000006330	RBM5	novel.circ.000597	1043-1094	-	69.63	2.95	1	PF01585,PF17780,PF00076,PF00641,PF12656	5	P52756|RBM5|1148|18840686|SpliceAid-F,P52756|RBM5|UCAUC|24332178|HITS-CLIP	1	0.789625
Q3T0D0	ENSBTAG00000021131	HNRNPK	novel.circ.003929	1123-1192	-	2.22	-1.05	1	PF00013,PF08067	4	P61978|HNRNPK|141|31724725|RBNS_ENCODE,P61978|HNRNPK|139|31724725|RBNS_ENCODE	4	0.789458
Q8WN55	ENSBTAG00000045828	PTBP1	novel.circ.002867	1214-1415	-	20.76	-1.05	1	PF13893,PF00076,PF11835	7	P26599|PTBP1|143|16179478|RBPDB;P26599|PTBP1|996|17548433|SpliceAid-F,P26599|PTBP1|1368|9858533|AEDB,P26599|PTBP1|995|9858533|SpliceAid-F,P26599|PTBP1|s100|19561594|SpliceAid-F,P26599|PTBP1|M227_0.6|238|NA;P26599|PTBP1|993|16431980|SpliceAid-F;P26599|PTBP1|994|16431980|SpliceAid-F,P26599|PTBP1|1002|16260624|SpliceAid-F;P26599|PTBP1|1314|9826658|AEDB	47	0.789458
Q3T0Q6	ENSBTAG00000012159	CNBP	novel.circ.000016	1501-1802	-	35.22	-1.05	1	PF00098	7	P62633|CNBP||NA|NA;P62633|CNBP|UGGAGNW|28329689|PAR-CLIP,P62633|CNBP||NA|NA	4	0.789375
Q3ZBJ1	ENSBTAG00000008873	NCBP2	novel.circ.003752	1373-1570	-	20.86	-1.07	1	PF00076	1	P52298|NCBP2|HepG2.NCBP2.5.83|31226278|eCLIP_ENCODE;P52298|NCBP2|HepG2.NCBP2.3.88|31226278|eCLIP_ENCODE,P52298|NCBP2|K562.NCBP2.4.87|31226278|eCLIP_ENCODE,P52298|NCBP2|HepG2.NCBP2.7.125|31226278|eCLIP_ENCODE;P52298|NCBP2|K562.NCBP2.0.66|31226278|eCLIP_ENCODE	4	0.78875
Q3SZR8	ENSBTAG00000040006	SRSF3	novel.circ.003752	1420-1617	-	20.85	-1.07	1	PF00076	1	P84103|SRSF3|UGGAC|26876937|PAR-CLIP;P84103|SRSF3|starBase_2|26876937|PAR-CLIP;P84103|SRSF3|s41|10094314|SpliceAid-F,P84103|SRSF3|1249|17036044|SpliceAid-F,P84103|SRSF3|1251|17036044|SpliceAid-F,P84103|SRSF3|starBase_1|26876937|PAR-CLIP,P84103|SRSF3|NA|NA|NA	19	0.78875
Q863B3	ENSBTAG00000010692	SND1	novel.circ.000987	281-332	-	69.33	2.93	1	PF00565,PF00567	6	Q7KZF4|SND1|K562.SND1.4.86|31226278|eCLIP_ENCODE	1	0.788667
Q3MHR5	ENSBTAG00000018258	SRSF2	novel.circ.001229	5854-177	back-splicing_junction	25.42	-1.07	1	PF00076	1	Q01130|SRSF2|1380|15247216|AEDB,Q01130|SRSF2|502|22002536|PDB,Q01130|SRSF2|1179|12612063|SpliceAid-F,Q01130|SRSF2|1182|9848651|SpliceAid-F,Q01130|SRSF2|1171|16990281|Spli;Q01130|SRSF2|1173|19843576|SpliceAid-F,Q01130|SRSF2|1334|11967553|AEDB,Q01130|SRSF2|gryymcyr|19296853|RBPMap;Q01130|SRSF2|1348|9858550|AEDB,Q01130|SRSF2|1176|9858550|SpliceAid-F,Q01130|SRSF2|ugcygyy|19296853|RBPMap,Q01130|SRSF2|…	3	0.788583
Q863B3	ENSBTAG00000010692	SND1	novel.circ.001300	1280-1369	-	75.73	2.92	1	PF00565,PF00567	6	Q7KZF4|SND1|K562.SND1.4.86|31226278|eCLIP_ENCODE	1	0.788417
Q3MHR5	ENSBTAG00000018258	SRSF2	novel.circ.004326	651-782	-	9.81	-1.08	1	PF00076	1	Q01130|SRSF2|s56|10094314|SpliceAid-F,Q01130|SRSF2|439|22002536|PDB,Q01130|SRSF2|M274_0.6|7543047|cisBP-RNA,Q01130|SRSF2|s47|7543047|SpliceAid-F,Q01130|SRSF2|380|31724725|NA;Q01130|SRSF2|1348|9858550|AEDB,Q01130|SRSF2|1176|9858550|SpliceAid-F,Q01130|SRSF2|ugcygyy|19296853|RBPMap,Q01130|SRSF2|s37|10022858|SpliceAid-F;Q01130|SRSF2|1173|19843576|SpliceAid-F,Q01130|SRSF2|1334|11967553|AEDB,Q01130|SRS…	4	0.788375
Q1JQD2	ENSBTAG00000000080	GRWD1	novel.circ.001043	1835-2360	-	66.6	-1.08	1	PF00400,PF12265	3	Q9BQ67|GRWD1|HepG2.GRWD1.6.332|31226278|eCLIP_ENCODE,Q9BQ67|GRWD1|HepG2.GRWD1.2.313|31226278|eCLIP_ENCODE;Q9BQ67|GRWD1|HepG2.GRWD1.8.169|31226278|eCLIP_ENCODE	4	0.788333
Q32LC7	ENSBTAG00000020309	G3BP1	novel.circ.001086	108-159	-	-5.91	-1.09	1	PF02136,PF00076	2	Q13283|G3BP1|33|11604510|cisBP-RNA;Q13283|G3BP1|M302_0.6|11604510|SELEX	2	0.788083
Q3MHR5	ENSBTAG00000018258	SRSF2	novel.circ.002876	297-372	-	2.89	-1.09	1	PF00076	1	Q01130|SRSF2|1323|11825891|AEDB,Q01130|SRSF2|s57|10094314|SpliceAid-F;Q01130|SRSF2|1380|15247216|AEDB,Q01130|SRSF2|502|22002536|PDB,Q01130|SRSF2|1179|12612063|SpliceAid-F,Q01130|SRSF2|1182|9848651|SpliceAid-F,Q01130|SRSF2|1171|16990281|Spli	2	0.788
A6QR44	ENSBTAG00000019869	DGCR8	novel.circ.001243	101-152	-	64.19	2.91	1	PF00035	2	Q8WYQ5|DGCR8|K562.DGCR8.1.60|31226278|eCLIP_ENCODE	1	0.78775
Q3T122	ENSBTAG00000001988	EIF3D	novel.circ.002834	1417-1974	-	70.04	-1.11	1	PF05091	1	O15371|EIF3D|HepG2.EIF3D.0.116|31226278|eCLIP_ENCODE	2	0.787083
Q3SZR8	ENSBTAG00000040006	SRSF3	novel.circ.002217	213-264	-	-6.3	-1.11	1	PF00076	1	P84103|SRSF3|UGGAC|26876937|PAR-CLIP;P84103|SRSF3|s41|10094314|SpliceAid-F,P84103|SRSF3|1249|17036044|SpliceAid-F,P84103|SRSF3|1251|17036044|SpliceAid-F,P84103|SRSF3|starBase_1|26876937|PAR-CLIP,P84103|SRSF3|NA|NA|NA	2	0.786958
Q3SZR8	ENSBTAG00000040006	SRSF3	novel.circ.001229	5854-177	back-splicing_junction	24.24	-1.12	1	PF00076	1	P84103|SRSF3|UGGAC|26876937|PAR-CLIP;P84103|SRSF3|s41|10094314|SpliceAid-F,P84103|SRSF3|1249|17036044|SpliceAid-F,P84103|SRSF3|1251|17036044|SpliceAid-F,P84103|SRSF3|starBase_1|26876937|PAR-CLIP,P84103|SRSF3|NA|NA|NA;P84103|SRSF3|starBase_2|26876937|PAR-CLIP	16	0.786708
Q8WN55	ENSBTAG00000045828	PTBP1	novel.circ.003752	1275-1472	-	19.26	-1.13	1	PF13893,PF00076,PF11835	7	P26599|PTBP1|143|16179478|RBPDB;P26599|PTBP1|996|17548433|SpliceAid-F,P26599|PTBP1|1368|9858533|AEDB,P26599|PTBP1|995|9858533|SpliceAid-F,P26599|PTBP1|s100|19561594|SpliceAid-F,P26599|PTBP1|M227_0.6|238|NA;P26599|PTBP1|994|16431980|SpliceAid-F,P26599|PTBP1|1002|16260624|SpliceAid-F	33	0.78625
Q3SZR8	ENSBTAG00000040006	SRSF3	novel.circ.000928	3241-3962	-	91.76	-1.14	1	PF00076	1	P84103|SRSF3|UGGAC|26876937|PAR-CLIP;P84103|SRSF3|s41|10094314|SpliceAid-F,P84103|SRSF3|1249|17036044|SpliceAid-F,P84103|SRSF3|1251|17036044|SpliceAid-F,P84103|SRSF3|starBase_1|26876937|PAR-CLIP,P84103|SRSF3|NA|NA|NA;P84103|SRSF3|starBase_4|26876937|PAR-CLIP,P84103|SRSF3|s81|10022858|SpliceAid-F,P84103|SRSF3|1245|17036044|SpliceAid-F,P84103|SRSF3|1244|17036044|SpliceAid-F,P84103|SRSF3|NA|NA|NA;P8…	77	0.785917
Q863B3	ENSBTAG00000010692	SND1	novel.circ.002263	714-765	-	63.32	2.86	1	PF00565,PF00567	6	Q7KZF4|SND1|HepG2.SND1.4.87|31226278|eCLIP_ENCODE	1	0.785625
Q32LC7	ENSBTAG00000020309	G3BP1	novel.circ.002368	33-84	-	-6.13	-1.15	1	PF02136,PF00076	2	Q13283|G3BP1|33|11604510|cisBP-RNA;Q13283|G3BP1|M302_0.6|11604510|SELEX	2	0.785458
Q3ZBG7	ENSBTAG00000012803	SRP19	novel.circ.001086	158-209	-	51.81	2.85	1	PF01922	1	P09132|SRP19|547|20179341|PDB	1	0.78525
Q3T0Q6	ENSBTAG00000012159	CNBP	novel.circ.003752	1420-1617	-	18.53	-1.16	1	PF00098	7	P62633|CNBP|UGGAGNW|28329689|PAR-CLIP,P62633|CNBP||NA|NA	2	0.785125
Q3T0D0	ENSBTAG00000021131	HNRNPK	novel.circ.000928	10443-11164	-	90.25	-1.17	1	PF00013,PF08067	4	P61978|HNRNPK|141|31724725|RBNS_ENCODE,P61978|HNRNPK|139|31724725|RBNS_ENCODE	4	0.784708
A6QR44	ENSBTAG00000019869	DGCR8	novel.circ.001300	1280-1369	-	74.11	2.83	1	PF00035	2	Q8WYQ5|DGCR8|K562.DGCR8.1.60|31226278|eCLIP_ENCODE	1	0.784583
A6QR44	ENSBTAG00000019869	DGCR8	novel.circ.003262	276-327	-	57.86	2.83	1	PF00035	2	Q8WYQ5|DGCR8|K562.DGCR8.1.60|31226278|eCLIP_ENCODE	1	0.784583
Q1JQD2	ENSBTAG00000000080	GRWD1	novel.circ.000928	723-1444	-	89.85	-1.18	1	PF00400,PF12265	3	Q9BQ67|GRWD1|HepG2.GRWD1.8.169|31226278|eCLIP_ENCODE;Q9BQ67|GRWD1|HepG2.GRWD1.6.332|31226278|eCLIP_ENCODE,Q9BQ67|GRWD1|HepG2.GRWD1.2.313|31226278|eCLIP_ENCODE	11	0.784375
Q0VCZ3	ENSBTAG00000015771	YTHDF2	novel.circ.000016	4651-4952	-	31.65	-1.18	1	PF04146	1	Q9Y5A9|YTHDF2|DRACH|27602518|iCLIP	4	0.784375
Q1LZB6	ENSBTAG00000016744	CAPRIN1	novel.circ.000928	9361-10082	-	89.64	-1.18	1	PF12287,PF18293	2	Q14444|CAPRIN1|WWWUAAAW|24393468|PAR-CLIP,Q14444|CAPRIN1|TWWAAATWW|24393468|PAR-CLIP	2	0.784208
Q1JQD2	ENSBTAG00000000080	GRWD1	novel.circ.002834	4475-5032	-	67	-1.18	1	PF00400,PF12265	3	Q9BQ67|GRWD1|HepG2.GRWD1.6.332|31226278|eCLIP_ENCODE,Q9BQ67|GRWD1|HepG2.GRWD1.2.313|31226278|eCLIP_ENCODE;Q9BQ67|GRWD1|HepG2.GRWD1.8.169|31226278|eCLIP_ENCODE	7	0.784167
Q3SZR8	ENSBTAG00000040006	SRSF3	novel.circ.002867	101-302	-	17.62	-1.18	1	PF00076	1	P84103|SRSF3|s41|10094314|SpliceAid-F,P84103|SRSF3|1249|17036044|SpliceAid-F,P84103|SRSF3|1251|17036044|SpliceAid-F,P84103|SRSF3|starBase_1|26876937|PAR-CLIP,P84103|SRSF3|NA|NA|NA;P84103|SRSF3|UGGAC|26876937|PAR-CLIP;P84103|SRSF3|starBase_4|26876937|PAR-CLIP,P84103|SRSF3|s81|10022858|SpliceAid-F,P84103|SRSF3|1245|17036044|SpliceAid-F,P84103|SRSF3|1244|17036044|SpliceAid-F,P84103|SRSF3|NA|NA|NA;P8…	16	0.784125
Q3T122	ENSBTAG00000001988	EIF3D	novel.circ.004264	2773-2942	-	12.06	-1.19	1	PF05091	1	O15371|EIF3D|HepG2.EIF3D.7.86|31226278|eCLIP_ENCODE,O15371|EIF3D|HepG2.EIF3D.3.107|31226278|eCLIP_ENCODE;O15371|EIF3D|HepG2.EIF3D.0.116|31226278|eCLIP_ENCODE;O15371|EIF3D|HepG2.EIF3D.8.93|31226278|eCLIP_ENCODE	9	0.783625
Q0VCZ3	ENSBTAG00000015771	YTHDF2	novel.circ.003752	3333-3530	-	17.36	-1.2	1	PF04146	1	Q9Y5A9|YTHDF2|DRACH|27602518|iCLIP	3	0.783333
Q3ZBJ1	ENSBTAG00000008873	NCBP2	novel.circ.000928	3243-3964	-	86.82	-1.23	1	PF00076	1	P52298|NCBP2|HepG2.NCBP2.5.83|31226278|eCLIP_ENCODE;P52298|NCBP2|HepG2.NCBP2.3.88|31226278|eCLIP_ENCODE,P52298|NCBP2|K562.NCBP2.4.87|31226278|eCLIP_ENCODE,P52298|NCBP2|HepG2.NCBP2.7.125|31226278|eCLIP_ENCODE;P52298|NCBP2|K562.NCBP2.0.66|31226278|eCLIP_ENCODE	10	0.781917
Q3ZBJ1	ENSBTAG00000008873	NCBP2	novel.circ.002867	114-315	-	16.31	-1.23	1	PF00076	1	P52298|NCBP2|K562.NCBP2.0.66|31226278|eCLIP_ENCODE;P52298|NCBP2|HepG2.NCBP2.5.83|31226278|eCLIP_ENCODE	3	0.781917
Q3MHR5	ENSBTAG00000018258	SRSF2	novel.circ.000016	1501-1802	-	29.9	-1.23	1	PF00076	1	Q01130|SRSF2|1173|19843576|SpliceAid-F,Q01130|SRSF2|1334|11967553|AEDB,Q01130|SRSF2|gryymcyr|19296853|RBPMap;Q01130|SRSF2|1380|15247216|AEDB,Q01130|SRSF2|502|22002536|PDB,Q01130|SRSF2|1179|12612063|SpliceAid-F,Q01130|SRSF2|1182|9848651|SpliceAid-F,Q01130|SRSF2|1171|16990281|Spli;Q01130|SRSF2|1172|19843576|SpliceAid-F,Q01130|SRSF2|1168|11779509|SpliceAid-F;Q01130|SRSF2|s56|10094314|SpliceAid-F,Q01…	7	0.781917
Q3T122	ENSBTAG00000001988	EIF3D	novel.circ.004326	1983-2114	-	6.67	-1.24	1	PF05091	1	O15371|EIF3D|HepG2.EIF3D.6.55|31226278|eCLIP_ENCODE;O15371|EIF3D|HepG2.EIF3D.0.116|31226278|eCLIP_ENCODE	6	0.781708
Q0VCZ3	ENSBTAG00000015771	YTHDF2	novel.circ.002834	1695-2252	-	63.8	-1.25	1	PF04146	1	Q9Y5A9|YTHDF2|DRACH|27602518|iCLIP	4	0.781083
Q0VCZ3	ENSBTAG00000015771	YTHDF2	novel.circ.004264	3277-3446	-	10.05	-1.28	1	PF04146	1	Q9Y5A9|YTHDF2|DRACH|27602518|iCLIP	3	0.78
Q28165	ENSBTAG00000006884	PABPN1	novel.circ.000928	7563-8284	-	84.32	-1.28	1	PF00076	1	Q86U42|PABPN1|M148_0.6|23846655|cisBP-RNA	2	0.779917
Q0VCZ3	ENSBTAG00000015771	YTHDF2	novel.circ.002867	4501-4702	-	15.08	-1.28	1	PF04146	1	Q9Y5A9|YTHDF2|DRACH|27602518|iCLIP	3	0.779833
Q3ZBV2	ENSBTAG00000003570	DDX19A	novel.circ.002834	4475-5032	-	62.01	-1.3	1	PF00270,PF00271	2	Q9UMR2|DDX19B|554|19219046|PDB,Q9UMR2|DDX19B|332|19244245|PDB	9	0.779333
Q3MHR5	ENSBTAG00000018258	SRSF2	novel.circ.002867	1-202	-	13.88	-1.33	1	PF00076	1	Q01130|SRSF2|1173|19843576|SpliceAid-F,Q01130|SRSF2|1334|11967553|AEDB,Q01130|SRSF2|gryymcyr|19296853|RBPMap;Q01130|SRSF2|s56|10094314|SpliceAid-F,Q01130|SRSF2|439|22002536|PDB,Q01130|SRSF2|M274_0.6|7543047|cisBP-RNA,Q01130|SRSF2|s47|7543047|SpliceAid-F,Q01130|SRSF2|380|31724725|NA;Q01130|SRSF2|1380|15247216|AEDB,Q01130|SRSF2|502|22002536|PDB,Q01130|SRSF2|1179|12612063|SpliceAid-F,Q01130|SRSF2|11…	5	0.777792
Q1RMU5	ENSBTAG00000006330	RBM5	novel.circ.004338	251-302	-	55.19	2.66	1	PF01585,PF17780,PF00076,PF00641,PF12656	5	P52756|RBM5|1148|18840686|SpliceAid-F,P52756|RBM5|UCAUC|24332178|HITS-CLIP	1	0.777667
Q863B3	ENSBTAG00000010692	SND1	novel.circ.000627	101-152	-	49.13	2.66	1	PF00565,PF00567	6	Q7KZF4|SND1|K562.SND1.4.86|31226278|eCLIP_ENCODE	1	0.777625
Q8HXM1	ENSBTAG00000003547	CSTF2	novel.circ.000016	4651-4952	-	26.75	-1.34	1	PF14327,PF00076,PF14304	3	P33240|CSTF2|SUGUSU|22813749|PAR-CLIP,P33240|CSTF2|HepG2.CSTF2.2.530|31226278|eCLIP_ENCODE,P33240|CSTF2|19|12773396|RBPDB,P33240|CSTF2|112|12773396|RBPDB,P33240|CSTF2|162|NA|NA	3	0.777542
Q1RMU5	ENSBTAG00000006330	RBM5	novel.circ.000933	205-256	-	55.14	2.66	1	PF01585,PF17780,PF00076,PF00641,PF12656	5	P52756|RBM5|1148|18840686|SpliceAid-F,P52756|RBM5|UCAUC|24332178|HITS-CLIP	1	0.777542
Q3T0Q6	ENSBTAG00000012159	CNBP	novel.circ.001229	5087-5324	-	18.39	-1.34	1	PF00098	7	P62633|CNBP||NA|NA	2	0.7775
Q863B3	ENSBTAG00000010692	SND1	novel.circ.001435	451-502	-	56.96	2.64	1	PF00565,PF00567	6	Q7KZF4|SND1|HepG2.SND1.5.68|31226278|eCLIP_ENCODE	1	0.776792
Q1RMU5	ENSBTAG00000006330	RBM5	novel.circ.000685	1887-57	back-splicing_junction	67.59	2.63	1	PF01585,PF17780,PF00076,PF00641,PF12656	5	P52756|RBM5|1148|18840686|SpliceAid-F,P52756|RBM5|UCAUC|24332178|HITS-CLIP	1	0.776333
Q9XSJ0	ENSBTAG00000013620	UCHL5	novel.circ.002834	6117-6674	-	58.58	-1.38	1	PF01088,PF18031	2	Q9Y5K5|UCHL5|K562.UCHL5.6.175|31226278|eCLIP_ENCODE;Q9Y5K5|UCHL5|HepG2.UCHL5.4.200|31226278|eCLIP_ENCODE	3	0.776042
Q0VCZ3	ENSBTAG00000015771	YTHDF2	novel.circ.001229	3553-3790	-	17.42	-1.38	1	PF04146	1	Q9Y5A9|YTHDF2|DRACH|27602518|iCLIP	2	0.776
Q3T122	ENSBTAG00000001988	EIF3D	novel.circ.001043	4455-4980	-	53.65	-1.39	1	PF05091	1	O15371|EIF3D|HepG2.EIF3D.0.116|31226278|eCLIP_ENCODE;O15371|EIF3D|HepG2.EIF3D.9.59|31226278|eCLIP_ENCODE	10	0.775333
Q3MHR5	ENSBTAG00000018258	SRSF2	novel.circ.003752	2890-3087	-	12.16	-1.39	1	PF00076	1	Q01130|SRSF2|1172|19843576|SpliceAid-F,Q01130|SRSF2|1168|11779509|SpliceAid-F;Q01130|SRSF2|1348|9858550|AEDB,Q01130|SRSF2|1176|9858550|SpliceAid-F,Q01130|SRSF2|ugcygyy|19296853|RBPMap,Q01130|SRSF2|s37|10022858|SpliceAid-F;Q01130|SRSF2|s56|10094314|SpliceAid-F,Q01130|SRSF2|439|22002536|PDB,Q01130|SRSF2|M274_0.6|7543047|cisBP-RNA,Q01130|SRSF2|s47|7543047|SpliceAid-F,Q01130|SRSF2|380|31724725|NA	4	0.77525
Q28165	ENSBTAG00000006884	PABPN1	novel.circ.002834	12259-12816	-	57.72	-1.4	1	PF00076	1	Q86U42|PABPN1|M148_0.6|23846655|cisBP-RNA	5	0.775208
A6QR44	ENSBTAG00000019869	DGCR8	novel.circ.003707	126-177	-	56.02	2.59	1	PF00035	2	Q8WYQ5|DGCR8|K562.DGCR8.1.60|31226278|eCLIP_ENCODE	1	0.774417
Q3ZBG7	ENSBTAG00000012803	SRP19	novel.circ.002368	326-377	-	53.72	2.57	1	PF01922	1	P09132|SRP19|547|20179341|PDB	1	0.773875
Q5E9J1	ENSBTAG00000008853	HNRNPF	novel.circ.002834	6699-7256	-	55.63	-1.44	1	PF00076,PF08080	3	P52597|HNRNPF|gugkau|22574288|RBPMap,P52597|HNRNPF|815|19506027|SpliceAid-F,P52597|HNRNPF|1331|12612063|AEDB,P52597|HNRNPF|817|12612063|SpliceAid-F,P52597|HNRNPF|836|NA|NA;P52597|HNRNPF|gukgykg|22574288|RBPMap	17	0.773167
P68509	ENSBTAG00000031134	YWHAH	novel.circ.002834	4197-4754	-	54.6	-1.47	1	PF00244	1	P61981|YWHAG|K562.YWHAG.1.41|31226278|eCLIP_ENCODE	2	0.772167
Q3T122	ENSBTAG00000001988	EIF3D	novel.circ.000928	4683-5404	-	74.59	-1.47	1	PF05091	1	O15371|EIF3D|HepG2.EIF3D.0.116|31226278|eCLIP_ENCODE;O15371|EIF3D|HepG2.EIF3D.7.86|31226278|eCLIP_ENCODE,O15371|EIF3D|HepG2.EIF3D.3.107|31226278|eCLIP_ENCODE;O15371|EIF3D|HepG2.EIF3D.8.93|31226278|eCLIP_ENCODE;O15371|EIF3D|HepG2.EIF3D.6.55|31226278|eCLIP_ENCODE;O15371|EIF3D|HepG2.EIF3D.9.59|31226278|eCLIP_ENCODE	21	0.772083
Q8HXM1	ENSBTAG00000003547	CSTF2	novel.circ.002867	4501-4702	-	10.39	-1.47	1	PF14327,PF00076,PF14304	3	P33240|CSTF2|SUGUSU|22813749|PAR-CLIP,P33240|CSTF2|HepG2.CSTF2.2.530|31226278|eCLIP_ENCODE,P33240|CSTF2|19|12773396|RBPDB,P33240|CSTF2|112|12773396|RBPDB,P33240|CSTF2|162|NA|NA	3	0.771917
Q3ZC34	ENSBTAG00000017830	RBMS2	novel.circ.000928	3241-3962	-	73.75	-1.49	1	PF00076	2	Q15434|RBMS2|326|31724725|RBNS_ENCODE	3	0.771375
Q8HXM1	ENSBTAG00000003547	CSTF2	novel.circ.002834	1695-2252	-	52.89	-1.51	1	PF14327,PF00076,PF14304	3	P33240|CSTF2|SUGUSU|22813749|PAR-CLIP,P33240|CSTF2|HepG2.CSTF2.2.530|31226278|eCLIP_ENCODE,P33240|CSTF2|19|12773396|RBPDB,P33240|CSTF2|112|12773396|RBPDB,P33240|CSTF2|162|NA|NA	3	0.770542
Q3MHX3	ENSBTAG00000031688	RBM4	novel.circ.002834	4475-5032	-	52.87	-1.51	1	PF00076,PF13893,PF00098	4	Q9BWF3|RBM4|1146|16260624|SpliceAid-F,Q9BWF3|RBM4|1145|16777844|SpliceAid-F,Q9BWF3|RBM4|1147|21518792|SpliceAid-F	2	0.7705
Q8HXM1	ENSBTAG00000003547	CSTF2	novel.circ.001229	3541-3778	-	13.68	-1.52	1	PF14327,PF00076,PF14304	3	P33240|CSTF2|SUGUSU|22813749|PAR-CLIP,P33240|CSTF2|HepG2.CSTF2.2.530|31226278|eCLIP_ENCODE,P33240|CSTF2|19|12773396|RBPDB,P33240|CSTF2|112|12773396|RBPDB,P33240|CSTF2|162|NA|NA	8	0.770125
Q1RMU5	ENSBTAG00000006330	RBM5	novel.circ.001990	1-56	-	61.3	2.48	1	PF01585,PF17780,PF00076,PF00641,PF12656	5	P52756|RBM5|1148|18840686|SpliceAid-F,P52756|RBM5|UCAUC|24332178|HITS-CLIP	1	0.770125
Q1RMJ7	ENSBTAG00000010393	TRNAU1AP	novel.circ.002834	4475-5032	-	52.32	-1.52	1	PF17654,PF00076	3	Q9NX07|TRNAU1AP|427|31724725|RBNS_ENCODE,Q9NX07|TRNAU1AP|428|31724725|RBNS_ENCODE	4	0.77
Q3T122	ENSBTAG00000001988	EIF3D	novel.circ.003752	1275-1472	-	8.5	-1.53	1	PF05091	1	O15371|EIF3D|HepG2.EIF3D.7.86|31226278|eCLIP_ENCODE,O15371|EIF3D|HepG2.EIF3D.3.107|31226278|eCLIP_ENCODE	4	0.769542
A6QR44	ENSBTAG00000019869	DGCR8	novel.circ.003951	793-844	-	57.61	2.46	1	PF00035	2	Q8WYQ5|DGCR8|K562.DGCR8.1.60|31226278|eCLIP_ENCODE	1	0.769042
Q0VCZ3	ENSBTAG00000015771	YTHDF2	novel.circ.001043	5503-6028	-	47.34	-1.54	1	PF04146	1	Q9Y5A9|YTHDF2|DRACH|27602518|iCLIP	11	0.768958
Q3T122	ENSBTAG00000001988	EIF3D	novel.circ.001229	5736-59	back-splicing_junction	12.8	-1.55	1	PF05091	1	O15371|EIF3D|HepG2.EIF3D.0.116|31226278|eCLIP_ENCODE;O15371|EIF3D|HepG2.EIF3D.8.93|31226278|eCLIP_ENCODE;O15371|EIF3D|HepG2.EIF3D.9.59|31226278|eCLIP_ENCODE;O15371|EIF3D|HepG2.EIF3D.6.55|31226278|eCLIP_ENCODE	6	0.76875
Q32LC7	ENSBTAG00000020309	G3BP1	novel.circ.003929	1128-1197	-	-6.57	-1.55	1	PF02136,PF00076	2	Q13283|G3BP1|33|11604510|cisBP-RNA;Q13283|G3BP1|M302_0.6|11604510|SELEX	8	0.768583
Q28141	ENSBTAG00000019821	DHX9	novel.circ.002715	17-68	-	56.27	2.44	1	PF00035,PF00271,PF04408,PF07717,PF00270	6	Q08211|DHX9|435|23361462|PDB	1	0.768458
Q3ZBT6	ENSBTAG00000001697	TRA2B	novel.circ.001043	12712-131	back-splicing_junction	46.64	-1.56	1	PF00076	1	P62995|TRA2B|aaguguu|19296853|RBPMap	2	0.76825
Q2KIR1	ENSBTAG00000009077	SNRPA	novel.circ.002834	4475-5032	-	49.62	-1.58	1	PF00076	2	P09012|SNRPA|M348_0.6|10094314|cisBP-RNA,P09012|SNRPA|M347_0.6|10094314|cisBP-RNA;P09012|SNRPA|M345_0.6|10094314|cisBP-RNA,P09012|SNRPA|M346_0.6|10094314|cisBP-RNA	6	0.767375
A6QR44	ENSBTAG00000019869	DGCR8	novel.circ.001990	217-272	-	59.65	2.39	1	PF00035	2	Q8WYQ5|DGCR8|K562.DGCR8.1.60|31226278|eCLIP_ENCODE	1	0.76625
Q3T122	ENSBTAG00000001988	EIF3D	novel.circ.002867	1-202	-	6.94	-1.61	1	PF05091	1	O15371|EIF3D|HepG2.EIF3D.0.116|31226278|eCLIP_ENCODE	2	0.766083
P61286	ENSBTAG00000046358	PABPC1	novel.circ.003863	315-366	-	59.51	2.38	1	PF00076,PF00658	5	P11940|PABPC1|416|10499800|PDB,P11940|PABPC1|452|10499800|PDB,P11940|PABPC1|480|23041282|PDB	1	0.765958
Q28141	ENSBTAG00000019821	DHX9	novel.circ.003929	1123-1192	-	-7.7	-1.62	1	PF00035,PF00271,PF04408,PF07717,PF00270	6	Q08211|DHX9|435|23361462|PDB	10	0.765875
Q32LC7	ENSBTAG00000020309	G3BP1	novel.circ.000928	10443-11164	-	65.82	-1.64	1	PF02136,PF00076	2	Q13283|G3BP1|M302_0.6|11604510|SELEX;Q13283|G3BP1|33|11604510|cisBP-RNA	7	0.765
Q28141	ENSBTAG00000019821	DHX9	novel.circ.002790	76-127	-	54.73	2.35	1	PF00035,PF00271,PF04408,PF07717,PF00270	6	Q08211|DHX9|435|23361462|PDB	1	0.764708
Q3T122	ENSBTAG00000001988	EIF3D	novel.circ.000016	1051-1352	-	17.31	-1.66	1	PF05091	1	O15371|EIF3D|HepG2.EIF3D.0.116|31226278|eCLIP_ENCODE;O15371|EIF3D|HepG2.EIF3D.7.86|31226278|eCLIP_ENCODE,O15371|EIF3D|HepG2.EIF3D.3.107|31226278|eCLIP_ENCODE	8	0.764333
Q2KIV0	ENSBTAG00000051118	NOL12	novel.circ.002834	4197-4754	-	46.01	-1.67	1	PF09805	1	Q9UGY1|NOL12|HepG2.NOL12.2.48|31226278|eCLIP_ENCODE;Q9UGY1|NOL12|HepG2.NOL12.9.52|31226278|eCLIP_ENCODE	2	0.763875
P63103	ENSBTAG00000000236	YWHAZ	novel.circ.002834	4197-4754	-	45.85	-1.67	1	PF00244	1	P61981|YWHAG|K562.YWHAG.1.41|31226278|eCLIP_ENCODE	2	0.76375
Q28141	ENSBTAG00000019821	DHX9	novel.circ.003024	151-202	-	51.67	2.32	1	PF00035,PF00271,PF04408,PF07717,PF00270	6	Q08211|DHX9|435|23361462|PDB	1	0.763417
Q3SZI4	ENSBTAG00000002108	YWHAQ	novel.circ.002834	11399-11956	-	44.51	-1.7	1	PF00244	1	P61981|YWHAG|K562.YWHAG.1.41|31226278|eCLIP_ENCODE	2	0.762458
Q3ZBJ1	ENSBTAG00000008873	NCBP2	novel.circ.002834	4197-4754	-	43.78	-1.72	1	PF00076	1	P52298|NCBP2|HepG2.NCBP2.5.83|31226278|eCLIP_ENCODE;P52298|NCBP2|K562.NCBP2.0.66|31226278|eCLIP_ENCODE	7	0.76175
Q0VCZ3	ENSBTAG00000015771	YTHDF2	novel.circ.000928	1801-2522	-	61.71	-1.72	1	PF04146	1	Q9Y5A9|YTHDF2|DRACH|27602518|iCLIP	12	0.761667
Q3ZBG7	ENSBTAG00000012803	SRP19	novel.circ.002834	8619-9176	-	42.38	-1.75	1	PF01922	1	P09132|SRP19|547|20179341|PDB	4	0.760375
Q3T0Q6	ENSBTAG00000012159	CNBP	novel.circ.000928	12241-12962	-	60	-1.75	1	PF00098	7	P62633|CNBP||NA|NA;P62633|CNBP|UGGAGNW|28329689|PAR-CLIP,P62633|CNBP||NA|NA	10	0.760292
Q32LC7	ENSBTAG00000020309	G3BP1	novel.circ.001043	11533-12058	-	38.24	-1.76	1	PF02136,PF00076	2	Q13283|G3BP1|M302_0.6|11604510|SELEX;Q13283|G3BP1|33|11604510|cisBP-RNA	2	0.759833
A6QR44	ENSBTAG00000019869	DGCR8	novel.circ.001046	1-52	-	48.03	2.22	1	PF00035	2	Q8WYQ5|DGCR8|K562.DGCR8.1.60|31226278|eCLIP_ENCODE	1	0.759125
Q3SZR8	ENSBTAG00000040006	SRSF3	novel.circ.002834	4475-5032	-	40.91	-1.78	1	PF00076	1	P84103|SRSF3|starBase_2|26876937|PAR-CLIP;P84103|SRSF3|UGGAC|26876937|PAR-CLIP;P84103|SRSF3|s41|10094314|SpliceAid-F,P84103|SRSF3|1249|17036044|SpliceAid-F,P84103|SRSF3|1251|17036044|SpliceAid-F,P84103|SRSF3|starBase_1|26876937|PAR-CLIP,P84103|SRSF3|NA|NA|NA;P84103|SRSF3|starBase_6|26876937|PAR-CLIP,P84103|SRSF3|1354|19273129|AEDB,P84103|SRSF3|starBase_3|26876937|PAR-CLIP;P84103|SRSF3|starBase_4|…	42	0.758958
Q3ZBT6	ENSBTAG00000001697	TRA2B	novel.circ.002834	4475-5032	-	40.59	-1.79	1	PF00076	1	P62995|TRA2B|aaguguu|19296853|RBPMap	3	0.758667
Q3T127	ENSBTAG00000023610	U2AF1L4	novel.circ.002834	4475-5032	-	40.52	-1.79	1	PF00642,PF00076	3	Q01081|U2AF1|K562.U2AF1.1.191|31226278|eCLIP_ENCODE;Q01081|U2AF1|HepG2.U2AF1.0.228|31226278|eCLIP_ENCODE,Q01081|U2AF1|K562.U2AF1.4.144|31226278|eCLIP_ENCODE;Q01081|U2AF1|K562.U2AF1.6.335|31226278|eCLIP_ENCODE,Q01081|U2AF1|HepG2.U2AF1.5.461|31226278|eCLIP_ENCODE;Q01081|U2AF1|K562.U2AF1.2.166|31226278|eCLIP_ENCODE	16	0.758583
Q3MHR5	ENSBTAG00000018258	SRSF2	novel.circ.002834	4197-4754	-	38.69	-1.84	1	PF00076	1	Q01130|SRSF2|1380|15247216|AEDB,Q01130|SRSF2|502|22002536|PDB,Q01130|SRSF2|1179|12612063|SpliceAid-F,Q01130|SRSF2|1182|9848651|SpliceAid-F,Q01130|SRSF2|1171|16990281|Spli;Q01130|SRSF2|1173|19843576|SpliceAid-F,Q01130|SRSF2|1334|11967553|AEDB,Q01130|SRSF2|gryymcyr|19296853|RBPMap;Q01130|SRSF2|s56|10094314|SpliceAid-F,Q01130|SRSF2|439|22002536|PDB,Q01130|SRSF2|M274_0.6|7543047|cisBP-RNA,Q01130|SRSF…	13	0.756833
A1A4K8	ENSBTAG00000011645	U2AF1	novel.circ.002834	7255-7812	-	38.61	-1.84	1	PF00642,PF00076	3	Q01081|U2AF1|K562.U2AF1.1.191|31226278|eCLIP_ENCODE;Q01081|U2AF1|HepG2.U2AF1.0.228|31226278|eCLIP_ENCODE,Q01081|U2AF1|K562.U2AF1.4.144|31226278|eCLIP_ENCODE;Q01081|U2AF1|K562.U2AF1.6.335|31226278|eCLIP_ENCODE,Q01081|U2AF1|HepG2.U2AF1.5.461|31226278|eCLIP_ENCODE;Q01081|U2AF1|K562.U2AF1.2.166|31226278|eCLIP_ENCODE	16	0.75675
P61286	ENSBTAG00000046358	PABPC1	novel.circ.000847	609-662	-	55.33	2.15	1	PF00076,PF00658	5	P11940|PABPC1|416|10499800|PDB,P11940|PABPC1|452|10499800|PDB,P11940|PABPC1|480|23041282|PDB	1	0.756167
Q2HJ60	ENSBTAG00000005726	HNRNPA2B1	novel.circ.002834	4475-5032	-	37.71	-1.86	1	PF00076	2	P22626|HNRNPA2B1|701|12426391|SpliceAid-F,P22626|HNRNPA2B1|710|24452013|SpliceAid-F;P22626|HNRNPA2B1|707|11024030|SpliceAid-F,P22626|HNRNPA2B1|708|16548521|SpliceAid-F,P22626|HNRNPA2B1|705|11024030|SpliceAid-F,P22626|HNRNPA2B1|125|12415010|RBPD	4	0.755875
Q0VD23	ENSBTAG00000006280	RBFOX3	novel.circ.002834	13788-417	back-splicing_junction	37.02	-1.88	1	PF12414,PF00076	2	A6NFN3|RBFOX3|276|31724725|RBNS_ENCODE	3	0.755208
Q8HXM1	ENSBTAG00000003547	CSTF2	novel.circ.001043	4455-4980	-	33.59	-1.88	1	PF14327,PF00076,PF14304	3	P33240|CSTF2|SUGUSU|22813749|PAR-CLIP,P33240|CSTF2|HepG2.CSTF2.2.530|31226278|eCLIP_ENCODE,P33240|CSTF2|19|12773396|RBPDB,P33240|CSTF2|112|12773396|RBPDB,P33240|CSTF2|162|NA|NA	3	0.755167
Q0IIG6	ENSBTAG00000000435	TARBP2	novel.circ.002834	4475-5032	-	36.62	-1.88	1	PF00035	2	Q15633|TARBP2|starBase_1|25043050|HITS-CLIP,Q15633|TARBP2|starBase_4|25043050|HITS-CLIP;Q15633|TARBP2|starBase_5|25043050|HITS-CLIP;Q15633|TARBP2|starBase_2|25043050|HITS-CLIP,Q15633|TARBP2|starBase_6|25043050|HITS-CLIP,Q15633|TARBP2|starBase_3|25043050|HITS-CLIP	6	0.754833
Q8HXM1	ENSBTAG00000003547	CSTF2	novel.circ.000928	1801-2522	-	51.87	-1.91	1	PF14327,PF00076,PF14304	3	P33240|CSTF2|SUGUSU|22813749|PAR-CLIP,P33240|CSTF2|HepG2.CSTF2.2.530|31226278|eCLIP_ENCODE,P33240|CSTF2|19|12773396|RBPDB,P33240|CSTF2|112|12773396|RBPDB,P33240|CSTF2|162|NA|NA	9	0.75375
Q863B3	ENSBTAG00000010692	SND1	novel.circ.002477	347-398	-	52.56	2.08	1	PF00565,PF00567	6	Q7KZF4|SND1|HepG2.SND1.5.68|31226278|eCLIP_ENCODE	1	0.753417
A6QR44	ENSBTAG00000019869	DGCR8	novel.circ.000987	281-332	-	53.52	2.05	1	PF00035	2	Q8WYQ5|DGCR8|K562.DGCR8.1.60|31226278|eCLIP_ENCODE	1	0.752
Q3MHX3	ENSBTAG00000031688	RBM4	novel.circ.003307	126-177	-	38.94	1.97	1	PF00076,PF13893,PF00098	4	Q9BWF3|RBM4|1146|16260624|SpliceAid-F,Q9BWF3|RBM4|1145|16777844|SpliceAid-F,Q9BWF3|RBM4|1147|21518792|SpliceAid-F	1	0.748708
Q3T0Q6	ENSBTAG00000012159	CNBP	novel.circ.002834	4475-5032	-	29.61	-2.05	1	PF00098	7	P62633|CNBP|UGGAGNW|28329689|PAR-CLIP,P62633|CNBP||NA|NA;P62633|CNBP||NA|NA	4	0.748083
P61286	ENSBTAG00000046358	PABPC1	novel.circ.000493	1109-1160	-	50.81	1.89	1	PF00076,PF00658	5	P11940|PABPC1|M349_0.6|7908267|cisBP-RNA	1	0.745583
Q3MHX3	ENSBTAG00000031688	RBM4	novel.circ.002715	526-577	-	46.79	1.89	1	PF00076,PF13893,PF00098	4	Q9BWF3|RBM4|278|31724725|RBNS_ENCODE,Q9BWF3|RBM4|gcgcgss|19561594|RBPMap,Q9BWF3|RBM4|s102|19561594|SpliceAid-F	1	0.745333
Q28141	ENSBTAG00000019821	DHX9	novel.circ.002475	1-52	-	36.63	1.81	1	PF00035,PF00271,PF04408,PF07717,PF00270	6	Q08211|DHX9|435|23361462|PDB	1	0.742167
Q3SZR8	ENSBTAG00000040006	SRSF3	novel.circ.001086	158-209	-	36.24	1.78	1	PF00076	1	P84103|SRSF3|ugcygyy|19296853|RBPMap	1	0.741042
Q3T0I4	ENSBTAG00000008498	ALYREF	novel.circ.002790	378-429	-	44.82	1.77	1	PF00076,PF13865	2	Q86V81|ALYREF|CUUCG|28934468|iCLIP	1	0.740542
Q3ZBJ1	ENSBTAG00000008873	NCBP2	novel.circ.001086	158-209	-	35.91	1.76	1	PF00076	1	P52298|NCBP2|HepG2.NCBP2.3.88|31226278|eCLIP_ENCODE,P52298|NCBP2|K562.NCBP2.4.87|31226278|eCLIP_ENCODE,P52298|NCBP2|HepG2.NCBP2.7.125|31226278|eCLIP_ENCODE	1	0.740125
P61286	ENSBTAG00000046358	PABPC1	novel.circ.001549	1261-1318	-	50.17	1.73	1	PF00076,PF00658	5	P11940|PABPC1|416|10499800|PDB,P11940|PABPC1|452|10499800|PDB,P11940|PABPC1|480|23041282|PDB	1	0.73875
Q2KIV0	ENSBTAG00000051118	NOL12	novel.circ.003929	788-857	-	50.4	1.69	1	PF09805	1	Q9UGY1|NOL12|HepG2.NOL12.9.52|31226278|eCLIP_ENCODE	1	0.73725
A6QR44	ENSBTAG00000019869	DGCR8	novel.circ.000660	82-133	-	43.37	1.69	1	PF00035	2	Q8WYQ5|DGCR8|K562.DGCR8.1.60|31226278|eCLIP_ENCODE	1	0.737
Q28141	ENSBTAG00000019821	DHX9	novel.circ.003608	276-327	-	38.65	1.64	1	PF00035,PF00271,PF04408,PF07717,PF00270	6	Q08211|DHX9|435|23361462|PDB	1	0.734833
Q3SZR8	ENSBTAG00000040006	SRSF3	novel.circ.002368	326-377	-	37.62	1.57	1	PF00076	1	P84103|SRSF3|ugcygyy|19296853|RBPMap	1	0.732167
Q863B3	ENSBTAG00000010692	SND1	novel.circ.002475	1-52	-	33.09	1.57	1	PF00565,PF00567	6	Q7KZF4|SND1|HepG2.SND1.5.68|31226278|eCLIP_ENCODE	1	0.732125
Q863B3	ENSBTAG00000010692	SND1	novel.circ.002480	341-392	-	37.39	1.56	1	PF00565,PF00567	6	Q7KZF4|SND1|K562.SND1.3.75|31226278|eCLIP_ENCODE,Q7KZF4|SND1|K562.SND1.6.82|31226278|eCLIP_ENCODE	1	0.731542
Q3T0I4	ENSBTAG00000008498	ALYREF	novel.circ.002477	522-573	-	43.08	1.54	1	PF00076,PF13865	2	Q86V81|ALYREF|CUUCG|28934468|iCLIP	1	0.730917
P61286	ENSBTAG00000046358	PABPC1	novel.circ.000597	1043-1094	-	43.81	1.5	1	PF00076,PF00658	5	P11940|PABPC1|416|10499800|PDB,P11940|PABPC1|452|10499800|PDB,P11940|PABPC1|480|23041282|PDB	1	0.729208
Q2KIV0	ENSBTAG00000051118	NOL12	novel.circ.003178	50-101	-	31.87	1.49	1	PF09805	1	Q9UGY1|NOL12|HepG2.NOL12.9.52|31226278|eCLIP_ENCODE	1	0.728667
Q863B3	ENSBTAG00000010692	SND1	novel.circ.002424	949-1004	-	43.3	1.47	1	PF00565,PF00567	6	Q7KZF4|SND1|HepG2.SND1.5.68|31226278|eCLIP_ENCODE	1	0.728042
Q863B3	ENSBTAG00000010692	SND1	novel.circ.003400	51-102	-	37.44	1.46	1	PF00565,PF00567	6	Q7KZF4|SND1|HepG2.SND1.5.68|31226278|eCLIP_ENCODE	1	0.727333
P61286	ENSBTAG00000046358	PABPC1	novel.circ.003156	465-516	-	38.57	1.41	1	PF00076,PF00658	5	P11940|PABPC1|416|10499800|PDB,P11940|PABPC1|452|10499800|PDB,P11940|PABPC1|480|23041282|PDB	1	0.725292
Q3ZBG7	ENSBTAG00000012803	SRP19	novel.circ.002475	178-229	-	30.59	1.4	1	PF01922	1	P09132|SRP19|547|20179341|PDB	1	0.725
Q28165	ENSBTAG00000006884	PABPN1	novel.circ.001681	420-471	-	34.51	1.38	1	PF00076	1	Q86U42|PABPN1|M148_0.6|23846655|cisBP-RNA	1	0.724083
Q863B3	ENSBTAG00000010692	SND1	novel.circ.002965	1121-1186	-	44.05	1.38	1	PF00565,PF00567	6	Q7KZF4|SND1|K562.SND1.4.86|31226278|eCLIP_ENCODE	1	0.724042
Q3T0I4	ENSBTAG00000008498	ALYREF	novel.circ.002745	326-377	-	34.21	1.36	1	PF00076,PF13865	2	Q86V81|ALYREF|CUUCG|28934468|iCLIP	1	0.723333
P61286	ENSBTAG00000046358	PABPC1	novel.circ.001344	163-218	-	40.81	1.33	1	PF00076,PF00658	5	P11940|PABPC1|416|10499800|PDB,P11940|PABPC1|452|10499800|PDB,P11940|PABPC1|480|23041282|PDB	1	0.722208
Q5E9J1	ENSBTAG00000008853	HNRNPF	novel.circ.001086	158-209	-	29.53	1.33	1	PF00076,PF08080	3	P52597|HNRNPF|gugkau|22574288|RBPMap,P52597|HNRNPF|815|19506027|SpliceAid-F,P52597|HNRNPF|1331|12612063|AEDB,P52597|HNRNPF|817|12612063|SpliceAid-F,P52597|HNRNPF|836|NA|NA	1	0.722
Q28165	ENSBTAG00000006884	PABPN1	novel.circ.002385	301-352	-	35.09	1.31	1	PF00076	1	Q86U42|PABPN1|M148_0.6|23846655|cisBP-RNA	1	0.721375
A6QQL9	ENSBTAG00000014353	SRP14	novel.circ.003929	788-857	-	43.69	1.31	1	PF02290	1	P37108|SRP14|445|11089964|PDB,P37108|SRP14|342|11089964|PDB	1	0.721292
Q1LZB6	ENSBTAG00000016744	CAPRIN1	novel.circ.000847	609-662	-	40.38	1.31	1	PF12287,PF18293	2	Q14444|CAPRIN1|WWWUAAAW|24393468|PAR-CLIP,Q14444|CAPRIN1|TWWAAATWW|24393468|PAR-CLIP	1	0.721208
P61286	ENSBTAG00000046358	PABPC1	novel.circ.002876	232-307	-	44.3	1.29	1	PF00076,PF00658	5	P11940|PABPC1|416|10499800|PDB,P11940|PABPC1|452|10499800|PDB,P11940|PABPC1|480|23041282|PDB	1	0.720542
Q28141	ENSBTAG00000019821	DHX9	novel.circ.001086	108-159	-	-30.42	-2.76	1	PF00035,PF00271,PF04408,PF07717,PF00270	6	Q08211|DHX9|435|23361462|PDB	2	0.7185
P61286	ENSBTAG00000046358	PABPC1	novel.circ.000704	26-77	-	27.83	1.21	1	PF00076,PF00658	5	P11940|PABPC1|416|10499800|PDB,P11940|PABPC1|452|10499800|PDB,P11940|PABPC1|480|23041282|PDB	1	0.717167
A1A4K8	ENSBTAG00000011645	U2AF1	novel.circ.002477	522-573	-	36.99	1.2	1	PF00642,PF00076	3	Q01081|U2AF1|HepG2.U2AF1.0.228|31226278|eCLIP_ENCODE,Q01081|U2AF1|K562.U2AF1.4.144|31226278|eCLIP_ENCODE	1	0.7165
A6QQL9	ENSBTAG00000014353	SRP14	novel.circ.001043	12581-13106	-	160.52	1.19	1	PF02290	1	P37108|SRP14|445|11089964|PDB,P37108|SRP14|342|11089964|PDB	1	0.716042
Q5E9J1	ENSBTAG00000008853	HNRNPF	novel.circ.002368	326-377	-	31.11	1.17	1	PF00076,PF08080	3	P52597|HNRNPF|gugkau|22574288|RBPMap,P52597|HNRNPF|815|19506027|SpliceAid-F,P52597|HNRNPF|1331|12612063|AEDB,P52597|HNRNPF|817|12612063|SpliceAid-F,P52597|HNRNPF|836|NA|NA	1	0.715292
Q2T9U1	ENSBTAG00000019085	SRP54	novel.circ.003863	315-366	-	37.75	1.16	1	PF00448,PF02978,PF02881,PF02492	4	P61011|SRP54|456|12244299|PDB	1	0.715042
A6QR44	ENSBTAG00000019869	DGCR8	novel.circ.002670	367-37	back-splicing_junction	30.91	1.15	1	PF00035	2	Q8WYQ5|DGCR8|K562.DGCR8.1.60|31226278|eCLIP_ENCODE	1	0.71475
P67808	ENSBTAG00000017368	YBX1	novel.circ.003178	50-101	-	26.93	1.15	1	PF00313	1	P67809|YBX1|1293|18503770|SpliceAid-F,P67809|YBX1|1321|19273129|AEDB,P67809|YBX1|1290|11447123|SpliceAid-F,P67809|YBX1|1339|11447123|AEDB,P67809|YBX1|1291|11447123|SpliceAid-F	1	0.714625
Q28165	ENSBTAG00000006884	PABPN1	novel.circ.002745	326-377	-	30.79	1.15	1	PF00076	1	Q86U42|PABPN1|M148_0.6|23846655|cisBP-RNA	1	0.714458
Q3ZBG7	ENSBTAG00000012803	SRP19	novel.circ.002670	126-177	-	30.76	1.15	1	PF01922	1	P09132|SRP19|547|20179341|PDB	1	0.714375
Q3T0Q6	ENSBTAG00000012159	CNBP	novel.circ.002715	526-577	-	33.69	1.12	1	PF00098	7	P62633|CNBP|UGGAGNW|28329689|PAR-CLIP,P62633|CNBP||NA|NA	1	0.713375
Q3T127	ENSBTAG00000023610	U2AF1L4	novel.circ.002477	522-573	-	35.39	1.1	1	PF00642,PF00076	3	Q01081|U2AF1|HepG2.U2AF1.0.228|31226278|eCLIP_ENCODE,Q01081|U2AF1|K562.U2AF1.4.144|31226278|eCLIP_ENCODE	1	0.712667
Q1LZB6	ENSBTAG00000016744	CAPRIN1	novel.circ.001549	1261-1318	-	37.83	1.05	1	PF12287,PF18293	2	Q14444|CAPRIN1|WWWUAAAW|24393468|PAR-CLIP,Q14444|CAPRIN1|TWWAAATWW|24393468|PAR-CLIP	1	0.710625
Q1LZB6	ENSBTAG00000016744	CAPRIN1	novel.circ.001482	268-37	back-splicing_junction	25.44	1.05	1	PF12287,PF18293	2	Q14444|CAPRIN1|WWWUAAAW|24393468|PAR-CLIP,Q14444|CAPRIN1|TWWAAATWW|24393468|PAR-CLIP	1	0.710417
Q2KIV0	ENSBTAG00000051118	NOL12	novel.circ.001435	161-212	-	30.5	1.03	1	PF09805	1	Q9UGY1|NOL12|HepG2.NOL12.9.52|31226278|eCLIP_ENCODE	1	0.70975
Q3ZBG7	ENSBTAG00000012803	SRP19	novel.circ.004280	40-91	-	28.65	1.01	1	PF01922	1	P09132|SRP19|547|20179341|PDB	1	0.708917
Q3ZBG7	ENSBTAG00000012803	SRP19	novel.circ.002385	287-338	-	30.1	1.01	1	PF01922	1	P09132|SRP19|547|20179341|PDB	1	0.70875
Q3ZBG7	ENSBTAG00000012803	SRP19	novel.circ.001681	420-471	-	28.51	1	1	PF01922	1	P09132|SRP19|547|20179341|PDB	1	0.708542
Q3ZBG7	ENSBTAG00000012803	SRP19	novel.circ.000237	26-77	-	28.01	0.97	1	PF01922	1	P09132|SRP19|547|20179341|PDB	1	0.70725
Q3ZBG7	ENSBTAG00000012803	SRP19	novel.circ.000704	167-218	-	24.25	0.97	1	PF01922	1	P09132|SRP19|547|20179341|PDB	1	0.707
Q3MHX3	ENSBTAG00000031688	RBM4	novel.circ.001806	76-127	-	27.7	0.96	1	PF00076,PF13893,PF00098	4	Q9BWF3|RBM4|1146|16260624|SpliceAid-F,Q9BWF3|RBM4|1145|16777844|SpliceAid-F,Q9BWF3|RBM4|1147|21518792|SpliceAid-F	1	0.706458
Q1RMU5	ENSBTAG00000006330	RBM5	novel.circ.003400	51-102	-	29.12	0.95	1	PF01585,PF17780,PF00076,PF00641,PF12656	5	P52756|RBM5|1148|18840686|SpliceAid-F,P52756|RBM5|UCAUC|24332178|HITS-CLIP	1	0.70625
Q1JQD2	ENSBTAG00000000080	GRWD1	novel.circ.003178	50-101	-	23.92	0.95	1	PF00400,PF12265	3	Q9BQ67|GRWD1|HepG2.GRWD1.6.332|31226278|eCLIP_ENCODE,Q9BQ67|GRWD1|HepG2.GRWD1.2.313|31226278|eCLIP_ENCODE	1	0.706083
Q3ZBJ1	ENSBTAG00000008873	NCBP2	novel.circ.001449	451-12	back-splicing_junction	27.32	0.93	1	PF00076	1	P52298|NCBP2|HepG2.NCBP2.5.83|31226278|eCLIP_ENCODE	1	0.705458
P67808	ENSBTAG00000017368	YBX1	novel.circ.001449	451-12	back-splicing_junction	27.16	0.92	1	PF00313	1	P67809|YBX1|124|15798215|RBPDB	1	0.705042
Q2T9U1	ENSBTAG00000019085	SRP54	novel.circ.003020	209-260	-	27.14	0.92	1	PF00448,PF02978,PF02881,PF02492	4	P61011|SRP54|456|12244299|PDB	1	0.705
A1A4K8	ENSBTAG00000011645	U2AF1	novel.circ.003040	5-56	-	30.24	0.92	1	PF00642,PF00076	3	Q01081|U2AF1|HepG2.U2AF1.0.228|31226278|eCLIP_ENCODE,Q01081|U2AF1|K562.U2AF1.4.144|31226278|eCLIP_ENCODE	1	0.704958
Q2T9U1	ENSBTAG00000019085	SRP54	novel.circ.002764	178-229	-	28.6	0.92	1	PF00448,PF02978,PF02881,PF02492	4	P61011|SRP54|456|12244299|PDB	1	0.704917
Q863B3	ENSBTAG00000010692	SND1	novel.circ.002867	1801-2002	-	68.94	0.9	1	PF00565,PF00567	6	Q7KZF4|SND1|K562.SND1.4.86|31226278|eCLIP_ENCODE	1	0.704292
Q3T0I4	ENSBTAG00000008498	ALYREF	novel.circ.003305	454-505	-	30.75	0.89	1	PF00076,PF13865	2	Q86V81|ALYREF|CUUCG|28934468|iCLIP	1	0.703917
Q3T0Q6	ENSBTAG00000012159	CNBP	novel.circ.001449	451-12	back-splicing_junction	26.54	0.88	1	PF00098	7	P62633|CNBP|UGGAGNW|28329689|PAR-CLIP,P62633|CNBP||NA|NA	1	0.703458
Q3T127	ENSBTAG00000023610	U2AF1L4	novel.circ.003040	742-37	back-splicing_junction	29.4	0.87	1	PF00642,PF00076	3	Q01081|U2AF1|HepG2.U2AF1.0.228|31226278|eCLIP_ENCODE,Q01081|U2AF1|K562.U2AF1.4.144|31226278|eCLIP_ENCODE	1	0.702917
Q2T9U1	ENSBTAG00000019085	SRP54	novel.circ.001482	268-37	back-splicing_junction	22.62	0.86	1	PF00448,PF02978,PF02881,PF02492	4	P61011|SRP54|456|12244299|PDB	1	0.702375
F1MJM0	ENSBTAG00000019133	ZNF326	novel.circ.002715	542-593	-	28.74	0.83	1	PF04988	1	Q5BKZ1|ZNF326|452|31724725|RBNS_ENCODE	1	0.701292
A1A4K8	ENSBTAG00000011645	U2AF1	novel.circ.003608	201-252	-	25.67	0.83	1	PF00642,PF00076	3	Q01081|U2AF1|HepG2.U2AF1.0.228|31226278|eCLIP_ENCODE,Q01081|U2AF1|K562.U2AF1.4.144|31226278|eCLIP_ENCODE	1	0.701208
Q28165	ENSBTAG00000006884	PABPN1	novel.circ.002631	111-162	-	22	0.82	1	PF00076	1	Q86U42|PABPN1|M148_0.6|23846655|cisBP-RNA	1	0.700625
A6QR44	ENSBTAG00000019869	DGCR8	novel.circ.000227	1293-1362	-	34.99	0.82	1	PF00035	2	Q8WYQ5|DGCR8|K562.DGCR8.1.60|31226278|eCLIP_ENCODE	1	0.700625
Q3T0I4	ENSBTAG00000008498	ALYREF	novel.circ.003130	1225-1294	-	34.8	0.8	1	PF00076,PF13865	2	Q86V81|ALYREF|CUUCG|28934468|iCLIP	1	0.700167
Q2T9U1	ENSBTAG00000019085	SRP54	novel.circ.001549	1261-1318	-	33.1	0.8	1	PF00448,PF02978,PF02881,PF02492	4	P61011|SRP54|456|12244299|PDB	1	0.699833
Q28141	ENSBTAG00000019821	DHX9	novel.circ.002368	251-302	-	-39.6	-3.23	1	PF00035,PF00271,PF04408,PF07717,PF00270	6	Q08211|DHX9|435|23361462|PDB	3	0.69875
Q3SZR8	ENSBTAG00000040006	SRSF3	novel.circ.002475	178-229	-	21.27	0.76	1	PF00076	1	P84103|SRSF3|s41|10094314|SpliceAid-F,P84103|SRSF3|1249|17036044|SpliceAid-F,P84103|SRSF3|1251|17036044|SpliceAid-F,P84103|SRSF3|starBase_1|26876937|PAR-CLIP,P84103|SRSF3|NA|NA|NA	1	0.698542
Q3T0I4	ENSBTAG00000008498	ALYREF	novel.circ.003024	101-152	-	25.99	0.76	1	PF00076,PF13865	2	Q86V81|ALYREF|CUUCG|28934468|iCLIP	1	0.698333
Q2KIV0	ENSBTAG00000051118	NOL12	novel.circ.003155	8-59	-	21.15	0.76	1	PF09805	1	Q9UGY1|NOL12|HepG2.NOL12.9.52|31226278|eCLIP_ENCODE	1	0.698208
Q3ZBJ1	ENSBTAG00000008873	NCBP2	novel.circ.002475	178-229	-	21.12	0.76	1	PF00076	1	P52298|NCBP2|HepG2.NCBP2.5.83|31226278|eCLIP_ENCODE	1	0.698125
Q3ZBG7	ENSBTAG00000012803	SRP19	novel.circ.001482	201-252	-	21.08	0.75	1	PF01922	1	P09132|SRP19|547|20179341|PDB	1	0.698042
Q2T9U1	ENSBTAG00000019085	SRP54	novel.circ.001990	1-56	-	30.32	0.74	1	PF00448,PF02978,PF02881,PF02492	4	P61011|SRP54|456|12244299|PDB	1	0.697667
Q28165	ENSBTAG00000006884	PABPN1	novel.circ.000848	851-920	-	33.53	0.73	1	PF00076	1	Q86U42|PABPN1|M148_0.6|23846655|cisBP-RNA	1	0.697167
Q3ZBJ1	ENSBTAG00000008873	NCBP2	novel.circ.001435	161-212	-	25.53	0.73	1	PF00076	1	P52298|NCBP2|HepG2.NCBP2.5.83|31226278|eCLIP_ENCODE	1	0.697167
P67808	ENSBTAG00000017368	YBX1	novel.circ.002790	353-404	-	26.97	0.73	1	PF00313	1	P67809|YBX1|124|15798215|RBPDB	1	0.697
Q3T127	ENSBTAG00000023610	U2AF1L4	novel.circ.003608	201-252	-	24.02	0.73	1	PF00642,PF00076	3	Q01081|U2AF1|HepG2.U2AF1.0.228|31226278|eCLIP_ENCODE,Q01081|U2AF1|K562.U2AF1.4.144|31226278|eCLIP_ENCODE	1	0.696917
Q2T9U1	ENSBTAG00000019085	SRP54	novel.circ.003355	308-359	-	29.81	0.72	1	PF00448,PF02978,PF02881,PF02492	4	P61011|SRP54|456|12244299|PDB	1	0.6965
Q2T9U1	ENSBTAG00000019085	SRP54	novel.circ.001814	816-867	-	28.46	0.71	1	PF00448,PF02978,PF02881,PF02492	4	P61011|SRP54|456|12244299|PDB	1	0.69625
Q2T9U1	ENSBTAG00000019085	SRP54	novel.circ.000696	176-227	-	23.77	0.71	1	PF00448,PF02978,PF02881,PF02492	4	P61011|SRP54|456|12244299|PDB	1	0.69625
Q3ZBJ1	ENSBTAG00000008873	NCBP2	novel.circ.002790	353-404	-	26.65	0.71	1	PF00076	1	P52298|NCBP2|HepG2.NCBP2.3.88|31226278|eCLIP_ENCODE,P52298|NCBP2|K562.NCBP2.4.87|31226278|eCLIP_ENCODE,P52298|NCBP2|HepG2.NCBP2.7.125|31226278|eCLIP_ENCODE	1	0.696208
Q2T9U1	ENSBTAG00000019085	SRP54	novel.circ.002379	32-83	-	20.35	0.7	1	PF00448,PF02978,PF02881,PF02492	4	P61011|SRP54|456|12244299|PDB	1	0.695958
Q2KIV0	ENSBTAG00000051118	NOL12	novel.circ.001256	155-12	back-splicing_junction	18.39	0.7	1	PF09805	1	Q9UGY1|NOL12|HepG2.NOL12.9.52|31226278|eCLIP_ENCODE	1	0.695833
Q2T9U1	ENSBTAG00000019085	SRP54	novel.circ.003951	793-844	-	27.28	0.69	1	PF00448,PF02978,PF02881,PF02492	4	P61011|SRP54|456|12244299|PDB	1	0.695542
Q3T127	ENSBTAG00000023610	U2AF1L4	novel.circ.000720	77-128	-	28	0.68	1	PF00642,PF00076	3	Q01081|U2AF1|K562.U2AF1.1.191|31226278|eCLIP_ENCODE	1	0.695167
Q3MHX3	ENSBTAG00000031688	RBM4	novel.circ.001669	237-288	-	23.23	0.68	1	PF00076,PF13893,PF00098	4	Q9BWF3|RBM4|279|31724725|RBNS_ENCODE,Q9BWF3|RBM4|280|31724725|RBNS_ENCODE	1	0.694875
Q2T9U1	ENSBTAG00000019085	SRP54	novel.circ.002466	251-302	-	19.88	0.67	1	PF00448,PF02978,PF02881,PF02492	4	P61011|SRP54|456|12244299|PDB	1	0.694625
Q1LZB6	ENSBTAG00000016744	CAPRIN1	novel.circ.003130	681-750	-	32.32	0.66	1	PF12287,PF18293	2	Q14444|CAPRIN1|WWWUAAAW|24393468|PAR-CLIP,Q14444|CAPRIN1|TWWAAATWW|24393468|PAR-CLIP	1	0.694292
F1MJM0	ENSBTAG00000019133	ZNF326	novel.circ.003929	788-857	-	32.26	0.66	1	PF04988	1	Q5BKZ1|ZNF326|452|31724725|RBNS_ENCODE	1	0.694125
Q2T9U1	ENSBTAG00000019085	SRP54	novel.circ.003635	87-138	-	19.43	0.64	1	PF00448,PF02978,PF02881,PF02492	4	P61011|SRP54|456|12244299|PDB	1	0.693333
Q3T0Q6	ENSBTAG00000012159	CNBP	novel.circ.002790	353-404	-	25.43	0.64	1	PF00098	7	P62633|CNBP|UGGAGNW|28329689|PAR-CLIP,P62633|CNBP||NA|NA	1	0.69325
Q2T9U1	ENSBTAG00000019085	SRP54	novel.circ.000704	26-77	-	19.2	0.62	1	PF00448,PF02978,PF02881,PF02492	4	P61011|SRP54|456|12244299|PDB	1	0.692667
Q863B3	ENSBTAG00000010692	SND1	novel.circ.000181	151-202	-	19.06	0.62	1	PF00565,PF00567	6	Q7KZF4|SND1|K562.SND1.2.81|31226278|eCLIP_ENCODE,Q7KZF4|SND1|HepG2.SND1.0.91|31226278|eCLIP_ENCODE	1	0.692292
Q28165	ENSBTAG00000006884	PABPN1	novel.circ.004320	672-733	-	29.72	0.61	1	PF00076	1	Q86U42|PABPN1|M148_0.6|23846655|cisBP-RNA	1	0.692125
A1A4K8	ENSBTAG00000011645	U2AF1	novel.circ.000720	1-52	-	26.73	0.61	1	PF00642,PF00076	3	Q01081|U2AF1|K562.U2AF1.1.191|31226278|eCLIP_ENCODE	1	0.692125
Q2T9U1	ENSBTAG00000019085	SRP54	novel.circ.004280	315-366	-	22.13	0.61	1	PF00448,PF02978,PF02881,PF02492	4	P61011|SRP54|456|12244299|PDB	1	0.692
Q3ZBG7	ENSBTAG00000012803	SRP19	novel.circ.003236	151-202	-	18.87	0.6	1	PF01922	1	P09132|SRP19|547|20179341|PDB	1	0.69175
A6QR44	ENSBTAG00000019869	DGCR8	novel.circ.003752	1275-1472	-	65.04	0.58	1	PF00035	2	Q8WYQ5|DGCR8|K562.DGCR8.1.60|31226278|eCLIP_ENCODE	1	0.690667
Q863B3	ENSBTAG00000010692	SND1	novel.circ.002385	137-188	-	22.74	0.56	1	PF00565,PF00567	6	Q7KZF4|SND1|K562.SND1.3.75|31226278|eCLIP_ENCODE,Q7KZF4|SND1|K562.SND1.6.82|31226278|eCLIP_ENCODE	1	0.690083
Q3SZR8	ENSBTAG00000040006	SRSF3	novel.circ.003155	8-59	-	18.24	0.56	1	PF00076	1	P84103|SRSF3|UGGAC|26876937|PAR-CLIP	1	0.689958
Q2T9U1	ENSBTAG00000019085	SRP54	novel.circ.000866	201-252	-	18.18	0.56	1	PF00448,PF02978,PF02881,PF02492	4	P61011|SRP54|456|12244299|PDB	1	0.689792
Q2T9U1	ENSBTAG00000019085	SRP54	novel.circ.000408	830-12	back-splicing_junction	24.77	0.55	1	PF00448,PF02978,PF02881,PF02492	4	P61011|SRP54|456|12244299|PDB	1	0.689417
Q2KIV0	ENSBTAG00000051118	NOL12	novel.circ.000720	77-128	-	25.55	0.54	1	PF09805	1	Q9UGY1|NOL12|HepG2.NOL12.2.48|31226278|eCLIP_ENCODE	1	0.689333
Q1RMU5	ENSBTAG00000006330	RBM5	novel.circ.001229	4969-5206	-	68.28	0.54	1	PF01585,PF17780,PF00076,PF00641,PF12656	5	P52756|RBM5|1148|18840686|SpliceAid-F,P52756|RBM5|UCAUC|24332178|HITS-CLIP	1	0.689292
Q3ZBG7	ENSBTAG00000012803	SRP19	novel.circ.003111	176-227	-	22.39	0.54	1	PF01922	1	P09132|SRP19|547|20179341|PDB	1	0.689208
Q1RMU5	ENSBTAG00000006330	RBM5	novel.circ.000237	351-12	back-splicing_junction	20.89	0.53	1	PF01585,PF17780,PF00076,PF00641,PF12656	5	P52756|RBM5|1148|18840686|SpliceAid-F,P52756|RBM5|UCAUC|24332178|HITS-CLIP	1	0.688792
Q2HJ60	ENSBTAG00000005726	HNRNPA2B1	novel.circ.000704	167-218	-	17.8	0.53	1	PF00076	2	P22626|HNRNPA2B1|707|11024030|SpliceAid-F,P22626|HNRNPA2B1|708|16548521|SpliceAid-F,P22626|HNRNPA2B1|705|11024030|SpliceAid-F,P22626|HNRNPA2B1|125|12415010|RBPD	1	0.688708
A1A4K8	ENSBTAG00000011645	U2AF1	novel.circ.003130	1225-1294	-	29.97	0.53	1	PF00642,PF00076	3	Q01081|U2AF1|K562.U2AF1.2.166|31226278|eCLIP_ENCODE	1	0.688708
Q3ZBG7	ENSBTAG00000012803	SRP19	novel.circ.000848	827-896	-	29.93	0.53	1	PF01922	1	P09132|SRP19|547|20179341|PDB	1	0.688625
Q28165	ENSBTAG00000006884	PABPN1	novel.circ.000227	953-1022	-	29.68	0.51	1	PF00076	1	Q86U42|PABPN1|M148_0.6|23846655|cisBP-RNA	1	0.688
P67808	ENSBTAG00000017368	YBX1	novel.circ.002385	287-338	-	21.91	0.51	1	PF00313	1	P67809|YBX1|1293|18503770|SpliceAid-F,P67809|YBX1|1321|19273129|AEDB,P67809|YBX1|1290|11447123|SpliceAid-F,P67809|YBX1|1339|11447123|AEDB,P67809|YBX1|1291|11447123|SpliceAid-F	1	0.687958
Q5E9J1	ENSBTAG00000008853	HNRNPF	novel.circ.002475	178-229	-	17.5	0.51	1	PF00076,PF08080	3	P52597|HNRNPF|gugkau|22574288|RBPMap,P52597|HNRNPF|815|19506027|SpliceAid-F,P52597|HNRNPF|1331|12612063|AEDB,P52597|HNRNPF|817|12612063|SpliceAid-F,P52597|HNRNPF|836|NA|NA	1	0.687875
Q3SZR8	ENSBTAG00000040006	SRSF3	novel.circ.002385	287-338	-	21.76	0.5	1	PF00076	1	P84103|SRSF3|UGGAC|26876937|PAR-CLIP	1	0.687583
Q2HJ60	ENSBTAG00000005726	HNRNPA2B1	novel.circ.002263	39-90	-	22.81	0.48	1	PF00076	2	P22626|HNRNPA2B1|707|11024030|SpliceAid-F,P22626|HNRNPA2B1|708|16548521|SpliceAid-F,P22626|HNRNPA2B1|705|11024030|SpliceAid-F,P22626|HNRNPA2B1|125|12415010|RBPD	1	0.686833
Q2HJ60	ENSBTAG00000005726	HNRNPA2B1	novel.circ.002385	287-338	-	21.41	0.48	1	PF00076	2	P22626|HNRNPA2B1|707|11024030|SpliceAid-F,P22626|HNRNPA2B1|708|16548521|SpliceAid-F,P22626|HNRNPA2B1|705|11024030|SpliceAid-F,P22626|HNRNPA2B1|125|12415010|RBPD	1	0.686708
Q28165	ENSBTAG00000006884	PABPN1	novel.circ.004264	2773-2942	-	50.65	0.48	1	PF00076	1	Q86U42|PABPN1|M148_0.6|23846655|cisBP-RNA	1	0.686667
Q3T0Q6	ENSBTAG00000012159	CNBP	novel.circ.003155	8-59	-	17.07	0.48	1	PF00098	7	P62633|CNBP||NA|NA	1	0.686625
Q3ZBG7	ENSBTAG00000012803	SRP19	novel.circ.000866	255-306	-	16.98	0.47	1	PF01922	1	P09132|SRP19|547|20179341|PDB	1	0.686375
Q3MHX3	ENSBTAG00000031688	RBM4	novel.circ.003111	426-477	-	21.13	0.46	1	PF00076,PF13893,PF00098	4	Q9BWF3|RBM4|279|31724725|RBNS_ENCODE,Q9BWF3|RBM4|280|31724725|RBNS_ENCODE	1	0.686
Q3T127	ENSBTAG00000023610	U2AF1L4	novel.circ.003130	1225-1294	-	28.72	0.46	1	PF00642,PF00076	3	Q01081|U2AF1|K562.U2AF1.2.166|31226278|eCLIP_ENCODE	1	0.68575
Q5E9J1	ENSBTAG00000008853	HNRNPF	novel.circ.000084	103-154	-	16.71	0.46	1	PF00076,PF08080	3	P52597|HNRNPF|gugkau|22574288|RBPMap,P52597|HNRNPF|815|19506027|SpliceAid-F,P52597|HNRNPF|1331|12612063|AEDB,P52597|HNRNPF|817|12612063|SpliceAid-F,P52597|HNRNPF|836|NA|NA	1	0.685625
P67808	ENSBTAG00000017368	YBX1	novel.circ.000704	167-218	-	16.68	0.45	1	PF00313	1	P67809|YBX1|1293|18503770|SpliceAid-F,P67809|YBX1|1321|19273129|AEDB,P67809|YBX1|1290|11447123|SpliceAid-F,P67809|YBX1|1339|11447123|AEDB,P67809|YBX1|1291|11447123|SpliceAid-F	1	0.685542
Q3T0Q6	ENSBTAG00000012159	CNBP	novel.circ.004280	40-91	-	19.6	0.45	1	PF00098	7	P62633|CNBP|UGGAGNW|28329689|PAR-CLIP,P62633|CNBP||NA|NA	1	0.685458
A6QQL9	ENSBTAG00000014353	SRP14	novel.circ.004264	2773-2942	-	49.94	0.45	1	PF02290	1	P37108|SRP14|445|11089964|PDB,P37108|SRP14|342|11089964|PDB	1	0.685375
Q3T0Q6	ENSBTAG00000012159	CNBP	novel.circ.000704	167-218	-	16.58	0.45	1	PF00098	7	P62633|CNBP||NA|NA	1	0.68525
Q9XSJ0	ENSBTAG00000013620	UCHL5	novel.circ.001229	5854-177	back-splicing_junction	65.68	0.44	1	PF01088,PF18031	2	Q9Y5K5|UCHL5|HepG2.UCHL5.4.200|31226278|eCLIP_ENCODE	1	0.685208
Q3MHX3	ENSBTAG00000031688	RBM4	novel.circ.000848	827-896	-	28.49	0.44	1	PF00076,PF13893,PF00098	4	Q9BWF3|RBM4|1146|16260624|SpliceAid-F,Q9BWF3|RBM4|1145|16777844|SpliceAid-F,Q9BWF3|RBM4|1147|21518792|SpliceAid-F	1	0.685167
Q2T9U1	ENSBTAG00000019085	SRP54	novel.circ.003236	76-127	-	16.52	0.44	1	PF00448,PF02978,PF02881,PF02492	4	P61011|SRP54|456|12244299|PDB	1	0.685083
Q3T0Q6	ENSBTAG00000012159	CNBP	novel.circ.001681	420-471	-	19.38	0.44	1	PF00098	7	P62633|CNBP|UGGAGNW|28329689|PAR-CLIP,P62633|CNBP||NA|NA	1	0.684875
Q3MHX3	ENSBTAG00000031688	RBM4	novel.circ.001267	1-52	-	19.33	0.43	1	PF00076,PF13893,PF00098	4	Q9BWF3|RBM4|279|31724725|RBNS_ENCODE,Q9BWF3|RBM4|280|31724725|RBNS_ENCODE	1	0.68475
P67808	ENSBTAG00000017368	YBX1	novel.circ.002263	39-90	-	21.96	0.43	1	PF00313	1	P67809|YBX1|1293|18503770|SpliceAid-F,P67809|YBX1|1321|19273129|AEDB,P67809|YBX1|1290|11447123|SpliceAid-F,P67809|YBX1|1339|11447123|AEDB,P67809|YBX1|1291|11447123|SpliceAid-F	1	0.68475
Q3SZR8	ENSBTAG00000040006	SRSF3	novel.circ.001681	420-471	-	19.3	0.43	1	PF00076	1	P84103|SRSF3|UGGAC|26876937|PAR-CLIP	1	0.684667
Q3T0Q6	ENSBTAG00000012159	CNBP	novel.circ.000237	26-77	-	19.28	0.43	1	PF00098	7	P62633|CNBP||NA|NA	1	0.684625
Q2HJ60	ENSBTAG00000005726	HNRNPA2B1	novel.circ.002477	522-573	-	23.55	0.43	1	PF00076	2	P22626|HNRNPA2B1|707|11024030|SpliceAid-F,P22626|HNRNPA2B1|708|16548521|SpliceAid-F,P22626|HNRNPA2B1|705|11024030|SpliceAid-F,P22626|HNRNPA2B1|125|12415010|RBPD	1	0.684583
Q2KIV0	ENSBTAG00000051118	NOL12	novel.circ.002631	86-137	-	16.31	0.43	1	PF09805	1	Q9UGY1|NOL12|HepG2.NOL12.2.48|31226278|eCLIP_ENCODE	1	0.6845
Q3T0Q6	ENSBTAG00000012159	CNBP	novel.circ.002385	287-338	-	20.46	0.42	1	PF00098	7	P62633|CNBP||NA|NA	1	0.684292
Q5E988	ENSBTAG00000015989	RPS5	novel.circ.003236	151-202	-	16.23	0.42	1	PF00177	1	P46782|RPS5|HepG2.RPS5.1.119|31226278|eCLIP_ENCODE	1	0.68425
Q3ZBJ1	ENSBTAG00000008873	NCBP2	novel.circ.001681	420-471	-	19	0.41	1	PF00076	1	P52298|NCBP2|HepG2.NCBP2.3.88|31226278|eCLIP_ENCODE,P52298|NCBP2|K562.NCBP2.4.87|31226278|eCLIP_ENCODE,P52298|NCBP2|HepG2.NCBP2.7.125|31226278|eCLIP_ENCODE	1	0.683917
Q3ZBG7	ENSBTAG00000012803	SRP19	novel.circ.003400	340-391	-	20.17	0.41	1	PF01922	1	P09132|SRP19|547|20179341|PDB	1	0.683583
Q3SZR8	ENSBTAG00000040006	SRSF3	novel.circ.002745	326-377	-	18.52	0.38	1	PF00076	1	P84103|SRSF3|UGGAC|26876937|PAR-CLIP	1	0.682667
Q28165	ENSBTAG00000006884	PABPN1	novel.circ.003156	576-627	-	21.08	0.38	1	PF00076	1	Q86U42|PABPN1|M148_0.6|23846655|cisBP-RNA	1	0.682625
P67808	ENSBTAG00000017368	YBX1	novel.circ.000237	26-77	-	18.36	0.37	1	PF00313	1	P67809|YBX1|124|15798215|RBPDB	1	0.68225
F1MJM0	ENSBTAG00000019133	ZNF326	novel.circ.002670	126-177	-	18.33	0.37	1	PF04988	1	Q5BKZ1|ZNF326|451|31724725|RBNS_ENCODE,Q5BKZ1|ZNF326|449|31724725|RBNS_ENCODE	1	0.682167
Q32LC7	ENSBTAG00000020309	G3BP1	novel.circ.001469	1-52	-	15.44	0.37	1	PF02136,PF00076	2	Q13283|G3BP1|33|11604510|cisBP-RNA;Q13283|G3BP1|M302_0.6|11604510|SELEX	1	0.682
Q3ZBG7	ENSBTAG00000012803	SRP19	novel.circ.002764	26-77	-	19.53	0.37	1	PF01922	1	P09132|SRP19|547|20179341|PDB	1	0.681958
P67808	ENSBTAG00000017368	YBX1	novel.circ.000720	77-128	-	22.39	0.36	1	PF00313	1	P67809|YBX1|1293|18503770|SpliceAid-F,P67809|YBX1|1321|19273129|AEDB,P67809|YBX1|1290|11447123|SpliceAid-F,P67809|YBX1|1339|11447123|AEDB,P67809|YBX1|1291|11447123|SpliceAid-F	1	0.681833
Q2KIV0	ENSBTAG00000051118	NOL12	novel.circ.003130	1293-1362	-	27.03	0.36	1	PF09805	1	Q9UGY1|NOL12|HepG2.NOL12.2.48|31226278|eCLIP_ENCODE	1	0.681708
P61286	ENSBTAG00000046358	PABPC1	novel.circ.002424	949-1004	-	23.46	0.36	1	PF00076,PF00658	5	P11940|PABPC1|M349_0.6|7908267|cisBP-RNA	1	0.681625
Q2KIV0	ENSBTAG00000051118	NOL12	novel.circ.001112	1-52	-	15.19	0.35	1	PF09805	1	Q9UGY1|NOL12|HepG2.NOL12.2.48|31226278|eCLIP_ENCODE	1	0.681292
Q3ZBJ1	ENSBTAG00000008873	NCBP2	novel.circ.000720	77-128	-	22.03	0.34	1	PF00076	1	P52298|NCBP2|HepG2.NCBP2.5.83|31226278|eCLIP_ENCODE	1	0.681
Q3T0I4	ENSBTAG00000008498	ALYREF	novel.circ.003958	996-1047	-	22.68	0.33	1	PF00076,PF13865	2	Q86V81|ALYREF|CUUCG|28934468|iCLIP	1	0.680458
A1A4K8	ENSBTAG00000011645	U2AF1	novel.circ.003262	1-52	-	17.5	0.32	1	PF00642,PF00076	3	Q01081|U2AF1|HepG2.U2AF1.0.228|31226278|eCLIP_ENCODE,Q01081|U2AF1|K562.U2AF1.4.144|31226278|eCLIP_ENCODE	1	0.68
Q2KIV0	ENSBTAG00000051118	NOL12	novel.circ.003305	651-702	-	20.82	0.32	1	PF09805	1	Q9UGY1|NOL12|HepG2.NOL12.2.48|31226278|eCLIP_ENCODE	1	0.679875
Q2KIV0	ENSBTAG00000051118	NOL12	novel.circ.003111	426-477	-	18.55	0.31	1	PF09805	1	Q9UGY1|NOL12|HepG2.NOL12.9.52|31226278|eCLIP_ENCODE	1	0.679458
Q2KIV0	ENSBTAG00000051118	NOL12	novel.circ.001267	1-52	-	17.25	0.3	1	PF09805	1	Q9UGY1|NOL12|HepG2.NOL12.9.52|31226278|eCLIP_ENCODE	1	0.679375
A6QQL9	ENSBTAG00000014353	SRP14	novel.circ.003608	201-252	-	17.2	0.3	1	PF02290	1	P37108|SRP14|445|11089964|PDB,P37108|SRP14|342|11089964|PDB	1	0.67925
Q3ZBJ1	ENSBTAG00000008873	NCBP2	novel.circ.003040	742-37	back-splicing_junction	19.58	0.3	1	PF00076	1	P52298|NCBP2|HepG2.NCBP2.5.83|31226278|eCLIP_ENCODE	1	0.678958
Q5E9J1	ENSBTAG00000008853	HNRNPF	novel.circ.004280	40-91	-	17.05	0.29	1	PF00076,PF08080	3	P52597|HNRNPF|gugkau|22574288|RBPMap,P52597|HNRNPF|815|19506027|SpliceAid-F,P52597|HNRNPF|1331|12612063|AEDB,P52597|HNRNPF|817|12612063|SpliceAid-F,P52597|HNRNPF|836|NA|NA	1	0.678833
Q3T0Q6	ENSBTAG00000012159	CNBP	novel.circ.001482	201-252	-	14.28	0.29	1	PF00098	7	P62633|CNBP||NA|NA	1	0.678708
Q3SZR8	ENSBTAG00000040006	SRSF3	novel.circ.001669	101-152	-	16.98	0.29	1	PF00076	1	P84103|SRSF3|UGGAC|26876937|PAR-CLIP	1	0.678667
Q3T127	ENSBTAG00000023610	U2AF1L4	novel.circ.003262	1-52	-	16.94	0.29	1	PF00642,PF00076	3	Q01081|U2AF1|HepG2.U2AF1.0.228|31226278|eCLIP_ENCODE,Q01081|U2AF1|K562.U2AF1.4.144|31226278|eCLIP_ENCODE	1	0.678583
Q3T0Q6	ENSBTAG00000012159	CNBP	novel.circ.003040	742-37	back-splicing_junction	19.4	0.28	1	PF00098	7	P62633|CNBP||NA|NA	1	0.678542
Q5E9J1	ENSBTAG00000008853	HNRNPF	novel.circ.001806	89-140	-	16.91	0.28	1	PF00076,PF08080	3	P52597|HNRNPF|gugkau|22574288|RBPMap,P52597|HNRNPF|815|19506027|SpliceAid-F,P52597|HNRNPF|1331|12612063|AEDB,P52597|HNRNPF|817|12612063|SpliceAid-F,P52597|HNRNPF|836|NA|NA	1	0.6785
Q3SZR8	ENSBTAG00000040006	SRSF3	novel.circ.002584	176-227	-	20.25	0.28	1	PF00076	1	P84103|SRSF3|UGGAC|26876937|PAR-CLIP	1	0.6785
Q3T0I4	ENSBTAG00000008498	ALYREF	novel.circ.000239	51-102	-	14.06	0.27	1	PF00076,PF13865	2	Q86V81|ALYREF|CUUCG|28934468|iCLIP	1	0.678083
Q2HJ60	ENSBTAG00000005726	HNRNPA2B1	novel.circ.004321	673-724	-	19.2	0.27	1	PF00076	2	P22626|HNRNPA2B1|707|11024030|SpliceAid-F,P22626|HNRNPA2B1|708|16548521|SpliceAid-F,P22626|HNRNPA2B1|705|11024030|SpliceAid-F,P22626|HNRNPA2B1|125|12415010|RBPD	1	0.678042
Q3ZBJ1	ENSBTAG00000008873	NCBP2	novel.circ.002584	176-227	-	19.94	0.26	1	PF00076	1	P52298|NCBP2|HepG2.NCBP2.5.83|31226278|eCLIP_ENCODE	1	0.677708
P67808	ENSBTAG00000017368	YBX1	novel.circ.000227	409-478	-	25.34	0.26	1	PF00313	1	P67809|YBX1|1293|18503770|SpliceAid-F,P67809|YBX1|1321|19273129|AEDB,P67809|YBX1|1290|11447123|SpliceAid-F,P67809|YBX1|1339|11447123|AEDB,P67809|YBX1|1291|11447123|SpliceAid-F	1	0.677708
Q2T9U1	ENSBTAG00000019085	SRP54	novel.circ.002262	426-477	-	19.89	0.26	1	PF00448,PF02978,PF02881,PF02492	4	P61011|SRP54|456|12244299|PDB	1	0.677625
Q2T9U1	ENSBTAG00000019085	SRP54	novel.circ.000660	82-133	-	18.94	0.26	1	PF00448,PF02978,PF02881,PF02492	4	P61011|SRP54|456|12244299|PDB	1	0.677417
F1MJM0	ENSBTAG00000019133	ZNF326	novel.circ.001806	89-140	-	16.49	0.26	1	PF04988	1	Q5BKZ1|ZNF326|451|31724725|RBNS_ENCODE,Q5BKZ1|ZNF326|449|31724725|RBNS_ENCODE	1	0.677417
Q2T9U1	ENSBTAG00000019085	SRP54	novel.circ.002670	205-256	-	16.41	0.25	1	PF00448,PF02978,PF02881,PF02492	4	P61011|SRP54|456|12244299|PDB	1	0.677208
Q3T0Q6	ENSBTAG00000012159	CNBP	novel.circ.000720	77-128	-	20.43	0.25	1	PF00098	7	P62633|CNBP|UGGAGNW|28329689|PAR-CLIP,P62633|CNBP||NA|NA	1	0.677167
Q3T0Q6	ENSBTAG00000012159	CNBP	novel.circ.002584	176-227	-	19.62	0.25	1	PF00098	7	P62633|CNBP|UGGAGNW|28329689|PAR-CLIP,P62633|CNBP||NA|NA	1	0.676958
Q5E9J1	ENSBTAG00000008853	HNRNPF	novel.circ.002385	287-338	-	17.53	0.24	1	PF00076,PF08080	3	P52597|HNRNPF|gugkau|22574288|RBPMap,P52597|HNRNPF|815|19506027|SpliceAid-F,P52597|HNRNPF|1331|12612063|AEDB,P52597|HNRNPF|817|12612063|SpliceAid-F,P52597|HNRNPF|836|NA|NA	1	0.676875
Q3SZR8	ENSBTAG00000040006	SRSF3	novel.circ.002631	86-137	-	13.51	0.24	1	PF00076	1	P84103|SRSF3|UGGAC|26876937|PAR-CLIP	1	0.676542
Q3SZR8	ENSBTAG00000040006	SRSF3	novel.circ.000876	276-327	-	17.28	0.23	1	PF00076	1	P84103|SRSF3|starBase_2|26876937|PAR-CLIP	1	0.67625
Q28165	ENSBTAG00000006884	PABPN1	novel.circ.000493	1209-1260	-	21.09	0.23	1	PF00076	1	Q86U42|PABPN1|M148_0.6|23846655|cisBP-RNA	1	0.676083
Q2KIV0	ENSBTAG00000051118	NOL12	novel.circ.000227	171-240	-	24.51	0.22	1	PF09805	1	Q9UGY1|NOL12|HepG2.NOL12.9.52|31226278|eCLIP_ENCODE	1	0.67575
A1A4K8	ENSBTAG00000011645	U2AF1	novel.circ.004338	59-110	-	15.8	0.22	1	PF00642,PF00076	3	Q01081|U2AF1|HepG2.U2AF1.0.228|31226278|eCLIP_ENCODE,Q01081|U2AF1|K562.U2AF1.4.144|31226278|eCLIP_ENCODE	1	0.675625
Q3T0Q6	ENSBTAG00000012159	CNBP	novel.circ.002631	86-137	-	13.18	0.21	1	PF00098	7	P62633|CNBP||NA|NA	1	0.675583
Q5E9J1	ENSBTAG00000008853	HNRNPF	novel.circ.002745	326-377	-	15.73	0.21	1	PF00076,PF08080	3	P52597|HNRNPF|gugkau|22574288|RBPMap,P52597|HNRNPF|815|19506027|SpliceAid-F,P52597|HNRNPF|1331|12612063|AEDB,P52597|HNRNPF|817|12612063|SpliceAid-F,P52597|HNRNPF|836|NA|NA	1	0.675417
Q2KIV0	ENSBTAG00000051118	NOL12	novel.circ.000246	293-344	-	15.73	0.21	1	PF09805	1	Q9UGY1|NOL12|HepG2.NOL12.9.52|31226278|eCLIP_ENCODE	1	0.675417
P67808	ENSBTAG00000017368	YBX1	novel.circ.000876	276-327	-	16.77	0.2	1	PF00313	1	P67809|YBX1|124|15798215|RBPDB	1	0.674958
Q3T0Q6	ENSBTAG00000012159	CNBP	novel.circ.003236	151-202	-	12.94	0.2	1	PF00098	7	P62633|CNBP|UGGAGNW|28329689|PAR-CLIP,P62633|CNBP||NA|NA	1	0.674917
Q2KIV0	ENSBTAG00000051118	NOL12	novel.circ.003400	340-391	-	16.72	0.2	1	PF09805	1	Q9UGY1|NOL12|HepG2.NOL12.9.52|31226278|eCLIP_ENCODE	1	0.674833
Q3T0I4	ENSBTAG00000008498	ALYREF	novel.circ.002965	312-377	-	22.78	0.19	1	PF00076,PF13865	2	Q86V81|ALYREF|CUUCG|28934468|iCLIP	1	0.674458
Q3T0I4	ENSBTAG00000008498	ALYREF	novel.circ.003595	236-287	-	16.51	0.18	1	PF00076,PF13865	2	Q86V81|ALYREF|CUUCG|28934468|iCLIP	1	0.674292
Q3MHX3	ENSBTAG00000031688	RBM4	novel.circ.003627	576-627	-	19.17	0.18	1	PF00076,PF13893,PF00098	4	Q9BWF3|RBM4|1146|16260624|SpliceAid-F,Q9BWF3|RBM4|1145|16777844|SpliceAid-F,Q9BWF3|RBM4|1147|21518792|SpliceAid-F	1	0.674208
Q2T9U1	ENSBTAG00000019085	SRP54	novel.circ.003591	77-128	-	15.15	0.17	1	PF00448,PF02978,PF02881,PF02492	4	P61011|SRP54|456|12244299|PDB	1	0.673917
Q2HJ60	ENSBTAG00000005726	HNRNPA2B1	novel.circ.001209	22-73	-	18.99	0.17	1	PF00076	2	P22626|HNRNPA2B1|707|11024030|SpliceAid-F,P22626|HNRNPA2B1|708|16548521|SpliceAid-F,P22626|HNRNPA2B1|705|11024030|SpliceAid-F,P22626|HNRNPA2B1|125|12415010|RBPD	1	0.67375
Q3T0Q6	ENSBTAG00000012159	CNBP	novel.circ.003608	201-252	-	15.07	0.17	1	PF00098	7	P62633|CNBP|UGGAGNW|28329689|PAR-CLIP,P62633|CNBP||NA|NA	1	0.673708
Q2T9U1	ENSBTAG00000019085	SRP54	novel.circ.000848	1-70	-	23.64	0.17	1	PF00448,PF02978,PF02881,PF02492	4	P61011|SRP54|456|12244299|PDB	1	0.673667
Q5E988	ENSBTAG00000015989	RPS5	novel.circ.003130	1293-1362	-	23.63	0.17	1	PF00177	1	P46782|RPS5|K562.RPS5.1.215|31226278|eCLIP_ENCODE;P46782|RPS5|HepG2.RPS5.1.119|31226278|eCLIP_ENCODE	1	0.673625
Q3T127	ENSBTAG00000023610	U2AF1L4	novel.circ.004338	59-110	-	14.99	0.16	1	PF00642,PF00076	3	Q01081|U2AF1|HepG2.U2AF1.0.228|31226278|eCLIP_ENCODE,Q01081|U2AF1|K562.U2AF1.4.144|31226278|eCLIP_ENCODE	1	0.6735
Q1JQD2	ENSBTAG00000000080	GRWD1	novel.circ.003608	201-252	-	14.85	0.16	1	PF00400,PF12265	3	Q9BQ67|GRWD1|HepG2.GRWD1.6.332|31226278|eCLIP_ENCODE,Q9BQ67|GRWD1|HepG2.GRWD1.2.313|31226278|eCLIP_ENCODE	1	0.673167
Q1JQD2	ENSBTAG00000000080	GRWD1	novel.circ.000720	77-128	-	18.71	0.15	1	PF00400,PF12265	3	Q9BQ67|GRWD1|HepG2.GRWD1.8.169|31226278|eCLIP_ENCODE	1	0.673083
Q3MHX3	ENSBTAG00000031688	RBM4	novel.circ.002187	345-396	-	14.8	0.15	1	PF00076,PF13893,PF00098	4	Q9BWF3|RBM4|1146|16260624|SpliceAid-F,Q9BWF3|RBM4|1145|16777844|SpliceAid-F,Q9BWF3|RBM4|1147|21518792|SpliceAid-F	1	0.673042
Q2T9U1	ENSBTAG00000019085	SRP54	novel.circ.002480	341-392	-	14.8	0.15	1	PF00448,PF02978,PF02881,PF02492	4	P61011|SRP54|456|12244299|PDB	1	0.673042
Q2HJ60	ENSBTAG00000005726	HNRNPA2B1	novel.circ.001267	1-52	-	14.78	0.15	1	PF00076	2	P22626|HNRNPA2B1|707|11024030|SpliceAid-F,P22626|HNRNPA2B1|708|16548521|SpliceAid-F,P22626|HNRNPA2B1|705|11024030|SpliceAid-F,P22626|HNRNPA2B1|125|12415010|RBPD	1	0.672958
Q3MHX3	ENSBTAG00000031688	RBM4	novel.circ.004326	2016-2147	-	33.93	0.15	1	PF00076,PF13893,PF00098	4	Q9BWF3|RBM4|1146|16260624|SpliceAid-F,Q9BWF3|RBM4|1145|16777844|SpliceAid-F,Q9BWF3|RBM4|1147|21518792|SpliceAid-F	1	0.672875
Q3MHX3	ENSBTAG00000031688	RBM4	novel.circ.002965	824-889	-	22.07	0.15	1	PF00076,PF13893,PF00098	4	Q9BWF3|RBM4|1146|16260624|SpliceAid-F,Q9BWF3|RBM4|1145|16777844|SpliceAid-F,Q9BWF3|RBM4|1147|21518792|SpliceAid-F	1	0.672792
Q3MHX3	ENSBTAG00000031688	RBM4	novel.circ.003024	77-128	-	15.87	0.14	1	PF00076,PF13893,PF00098	4	Q9BWF3|RBM4|278|31724725|RBNS_ENCODE,Q9BWF3|RBM4|gcgcgss|19561594|RBPMap,Q9BWF3|RBM4|s102|19561594|SpliceAid-F	1	0.672667
Q3ZBJ1	ENSBTAG00000008873	NCBP2	novel.circ.000866	255-306	-	12.11	0.14	1	PF00076	1	P52298|NCBP2|HepG2.NCBP2.5.83|31226278|eCLIP_ENCODE	1	0.672542
Q2KIR1	ENSBTAG00000009077	SNRPA	novel.circ.004264	2689-2858	-	42.79	0.14	1	PF00076	2	P09012|SNRPA|M348_0.6|10094314|cisBP-RNA,P09012|SNRPA|M347_0.6|10094314|cisBP-RNA	1	0.672458
Q5E9J1	ENSBTAG00000008853	HNRNPF	novel.circ.001669	237-288	-	14.53	0.14	1	PF00076,PF08080	3	P52597|HNRNPF|gugkau|22574288|RBPMap,P52597|HNRNPF|815|19506027|SpliceAid-F,P52597|HNRNPF|1331|12612063|AEDB,P52597|HNRNPF|817|12612063|SpliceAid-F,P52597|HNRNPF|836|NA|NA	1	0.672333
Q2HJ60	ENSBTAG00000005726	HNRNPA2B1	novel.circ.003111	176-227	-	15.72	0.14	1	PF00076	2	P22626|HNRNPA2B1|707|11024030|SpliceAid-F,P22626|HNRNPA2B1|708|16548521|SpliceAid-F,P22626|HNRNPA2B1|705|11024030|SpliceAid-F,P22626|HNRNPA2B1|125|12415010|RBPD	1	0.672292
Q3ZBJ1	ENSBTAG00000008873	NCBP2	novel.circ.003111	426-477	-	15.7	0.13	1	PF00076	1	P52298|NCBP2|HepG2.NCBP2.5.83|31226278|eCLIP_ENCODE	1	0.67225
P67808	ENSBTAG00000017368	YBX1	novel.circ.000866	255-306	-	11.99	0.13	1	PF00313	1	P67809|YBX1|1293|18503770|SpliceAid-F,P67809|YBX1|1321|19273129|AEDB,P67809|YBX1|1290|11447123|SpliceAid-F,P67809|YBX1|1339|11447123|AEDB,P67809|YBX1|1291|11447123|SpliceAid-F	1	0.672208
Q5E9J1	ENSBTAG00000008853	HNRNPF	novel.circ.001318	255-306	-	11.97	0.13	1	PF00076,PF08080	3	P52597|HNRNPF|gugkau|22574288|RBPMap,P52597|HNRNPF|815|19506027|SpliceAid-F,P52597|HNRNPF|1331|12612063|AEDB,P52597|HNRNPF|817|12612063|SpliceAid-F,P52597|HNRNPF|836|NA|NA	1	0.672167
Q5EA53	ENSBTAG00000021016	GTF2F1	novel.circ.000847	609-662	-	19.41	0.13	1	PF05793	1	P35269|GTF2F1|K562.GTF2F1.1.466|31226278|eCLIP_ENCODE,P35269|GTF2F1|HepG2.GTF2F1.1.345|31226278|eCLIP_ENCODE	1	0.672167
F1MJM0	ENSBTAG00000019133	ZNF326	novel.circ.003040	742-37	back-splicing_junction	16.76	0.13	1	PF04988	1	Q5BKZ1|ZNF326|451|31724725|RBNS_ENCODE,Q5BKZ1|ZNF326|449|31724725|RBNS_ENCODE	1	0.672083
Q2T9U1	ENSBTAG00000019085	SRP54	novel.circ.004044	438-37	back-splicing_junction	14.36	0.12	1	PF00448,PF02978,PF02881,PF02492	4	P61011|SRP54|456|12244299|PDB	1	0.671875
Q3T0Q6	ENSBTAG00000012159	CNBP	novel.circ.001209	22-73	-	18.18	0.12	1	PF00098	7	P62633|CNBP||NA|NA	1	0.671833
Q3ZBG7	ENSBTAG00000012803	SRP19	novel.circ.003635	176-227	-	11.82	0.12	1	PF01922	1	P09132|SRP19|547|20179341|PDB	1	0.67175
Q3MHX3	ENSBTAG00000031688	RBM4	novel.circ.003401	217-268	-	11.8	0.12	1	PF00076,PF13893,PF00098	4	Q9BWF3|RBM4|1146|16260624|SpliceAid-F,Q9BWF3|RBM4|1145|16777844|SpliceAid-F,Q9BWF3|RBM4|1147|21518792|SpliceAid-F	1	0.671667
Q3T0Q6	ENSBTAG00000012159	CNBP	novel.circ.001267	1-52	-	14.25	0.12	1	PF00098	7	P62633|CNBP|UGGAGNW|28329689|PAR-CLIP,P62633|CNBP||NA|NA	1	0.671583
Q2T9U1	ENSBTAG00000019085	SRP54	novel.circ.001900	337-394	-	20.53	0.11	1	PF00448,PF02978,PF02881,PF02492	4	P61011|SRP54|456|12244299|PDB	1	0.671167
Q3ZBJ1	ENSBTAG00000008873	NCBP2	novel.circ.000848	827-896	-	22.57	0.11	1	PF00076	1	P52298|NCBP2|K562.NCBP2.0.66|31226278|eCLIP_ENCODE	1	0.671125
A1A4K8	ENSBTAG00000011645	U2AF1	novel.circ.001990	1222-1277	-	18.77	0.1	1	PF00642,PF00076	3	Q01081|U2AF1|K562.U2AF1.2.166|31226278|eCLIP_ENCODE	1	0.670667
Q3ZBG7	ENSBTAG00000012803	SRP19	novel.circ.001990	1222-1277	-	18.73	0.09	1	PF01922	1	P09132|SRP19|547|20179341|PDB	1	0.670583
P10881	ENSBTAG00000008716	SSB	novel.circ.004264	2689-2858	-	41.64	0.09	1	PF08777,PF05383,PF00076	3	P05455|SSB|58|11342556|RBPDB,P05455|SSB|457|16387655|PDB	1	0.670375
Q3ZBT6	ENSBTAG00000001697	TRA2B	novel.circ.000876	276-327	-	14.93	0.09	1	PF00076	1	P62995|TRA2B|aaguguu|19296853|RBPMap	1	0.670292
Q3T127	ENSBTAG00000023610	U2AF1L4	novel.circ.001990	1222-1277	-	18.61	0.09	1	PF00642,PF00076	3	Q01081|U2AF1|K562.U2AF1.2.166|31226278|eCLIP_ENCODE	1	0.670292
Q3SZR8	ENSBTAG00000040006	SRSF3	novel.circ.002764	26-77	-	14.92	0.09	1	PF00076	1	P84103|SRSF3|starBase_4|26876937|PAR-CLIP,P84103|SRSF3|s81|10022858|SpliceAid-F,P84103|SRSF3|1245|17036044|SpliceAid-F,P84103|SRSF3|1244|17036044|SpliceAid-F,P84103|SRSF3|NA|NA|NA	1	0.67025
Q5EA53	ENSBTAG00000021016	GTF2F1	novel.circ.000720	502-553	-	17.45	0.08	1	PF05793	1	P35269|GTF2F1|K562.GTF2F1.1.466|31226278|eCLIP_ENCODE,P35269|GTF2F1|HepG2.GTF2F1.1.345|31226278|eCLIP_ENCODE	1	0.670125
Q1RMJ7	ENSBTAG00000010393	TRNAU1AP	novel.circ.003863	865-916	-	18.53	0.08	1	PF17654,PF00076	3	Q9NX07|TRNAU1AP|427|31724725|RBNS_ENCODE,Q9NX07|TRNAU1AP|428|31724725|RBNS_ENCODE	1	0.670083
Q1JQD2	ENSBTAG00000000080	GRWD1	novel.circ.000847	921-974	-	18.39	0.08	1	PF00400,PF12265	3	Q9BQ67|GRWD1|HepG2.GRWD1.8.169|31226278|eCLIP_ENCODE	1	0.669792
F1MJM0	ENSBTAG00000019133	ZNF326	novel.circ.004321	698-749	-	15.69	0.07	1	PF04988	1	Q5BKZ1|ZNF326|450|31724725|RBNS_ENCODE	1	0.669458
Q3T0I4	ENSBTAG00000008498	ALYREF	novel.circ.000685	343-420	-	22.92	0.06	1	PF00076,PF13865	2	Q86V81|ALYREF|CUUCG|28934468|iCLIP	1	0.669333
Q3ZBJ1	ENSBTAG00000008873	NCBP2	novel.circ.003400	340-391	-	14.55	0.06	1	PF00076	1	P52298|NCBP2|HepG2.NCBP2.5.83|31226278|eCLIP_ENCODE	1	0.669333
P67808	ENSBTAG00000017368	YBX1	novel.circ.003156	576-627	-	15.54	0.06	1	PF00313	1	P67809|YBX1|124|15798215|RBPDB	1	0.669125
Q2T9U1	ENSBTAG00000019085	SRP54	novel.circ.002475	1-52	-	10.9	0.06	1	PF00448,PF02978,PF02881,PF02492	4	P61011|SRP54|456|12244299|PDB	1	0.669125
P68509	ENSBTAG00000031134	YWHAH	novel.circ.001043	12315-12840	-	113.77	0.06	1	PF00244	1	P61981|YWHAG|K562.YWHAG.1.41|31226278|eCLIP_ENCODE	1	0.669083
Q2KIV0	ENSBTAG00000051118	NOL12	novel.circ.004326	2016-2147	-	32.14	0.06	1	PF09805	1	Q9UGY1|NOL12|HepG2.NOL12.9.52|31226278|eCLIP_ENCODE	1	0.669083
Q5E9J1	ENSBTAG00000008853	HNRNPF	novel.circ.004321	698-749	-	15.52	0.06	1	PF00076,PF08080	3	P52597|HNRNPF|gukgykg|22574288|RBPMap	1	0.669042
Q2HJ60	ENSBTAG00000005726	HNRNPA2B1	novel.circ.004320	1111-1172	-	19.52	0.05	1	PF00076	2	P22626|HNRNPA2B1|707|11024030|SpliceAid-F,P22626|HNRNPA2B1|708|16548521|SpliceAid-F,P22626|HNRNPA2B1|705|11024030|SpliceAid-F,P22626|HNRNPA2B1|125|12415010|RBPD	1	0.668875
Q2KIR1	ENSBTAG00000009077	SNRPA	novel.circ.004321	698-749	-	15.42	0.05	1	PF00076	2	P09012|SNRPA|M348_0.6|10094314|cisBP-RNA,P09012|SNRPA|M347_0.6|10094314|cisBP-RNA	1	0.668833
Q1JQD2	ENSBTAG00000000080	GRWD1	novel.circ.003305	651-702	-	16.26	0.05	1	PF00400,PF12265	3	Q9BQ67|GRWD1|HepG2.GRWD1.6.332|31226278|eCLIP_ENCODE,Q9BQ67|GRWD1|HepG2.GRWD1.2.313|31226278|eCLIP_ENCODE	1	0.668792
Q2KIR1	ENSBTAG00000009077	SNRPA	novel.circ.002631	111-162	-	10.77	0.05	1	PF00076	2	P09012|SNRPA|M345_0.6|10094314|cisBP-RNA,P09012|SNRPA|M346_0.6|10094314|cisBP-RNA	1	0.66875
Q3ZBG7	ENSBTAG00000012803	SRP19	novel.circ.001814	551-602	-	16.88	0.05	1	PF01922	1	P09132|SRP19|547|20179341|PDB	1	0.66875
Q3ZBG7	ENSBTAG00000012803	SRP19	novel.circ.003863	865-916	-	17.91	0.05	1	PF01922	1	P09132|SRP19|547|20179341|PDB	1	0.668667
Q5E9J1	ENSBTAG00000008853	HNRNPF	novel.circ.000876	276-327	-	14.2	0.04	1	PF00076,PF08080	3	P52597|HNRNPF|gugkau|22574288|RBPMap,P52597|HNRNPF|815|19506027|SpliceAid-F,P52597|HNRNPF|1331|12612063|AEDB,P52597|HNRNPF|817|12612063|SpliceAid-F,P52597|HNRNPF|836|NA|NA	1	0.668417
Q3ZBT6	ENSBTAG00000001697	TRA2B	novel.circ.000847	921-974	-	17.75	0.04	1	PF00076	1	P62995|TRA2B|aaguguu|19296853|RBPMap	1	0.668292
Q5EA53	ENSBTAG00000021016	GTF2F1	novel.circ.000696	31-82	-	12.97	0.04	1	PF05793	1	P35269|GTF2F1|K562.GTF2F1.1.466|31226278|eCLIP_ENCODE,P35269|GTF2F1|HepG2.GTF2F1.1.345|31226278|eCLIP_ENCODE	1	0.668292
Q3ZBJ1	ENSBTAG00000008873	NCBP2	novel.circ.004320	1111-1172	-	19.23	0.04	1	PF00076	1	P52298|NCBP2|HepG2.NCBP2.5.83|31226278|eCLIP_ENCODE	1	0.668208
Q2HJ60	ENSBTAG00000005726	HNRNPA2B1	novel.circ.000848	851-920	-	21.28	0.03	1	PF00076	2	P22626|HNRNPA2B1|707|11024030|SpliceAid-F,P22626|HNRNPA2B1|708|16548521|SpliceAid-F,P22626|HNRNPA2B1|705|11024030|SpliceAid-F,P22626|HNRNPA2B1|125|12415010|RBPD	1	0.668042
Q2KIV0	ENSBTAG00000051118	NOL12	novel.circ.001945	1051-1102	-	17.2	0.03	1	PF09805	1	Q9UGY1|NOL12|HepG2.NOL12.2.48|31226278|eCLIP_ENCODE	1	0.66775
Q3ZBV2	ENSBTAG00000003570	DDX19A	novel.circ.002424	706-761	-	17.5	0.02	1	PF00270,PF00271	2	Q9UMR2|DDX19B|554|19219046|PDB,Q9UMR2|DDX19B|332|19244245|PDB	1	0.667708
Q32LC7	ENSBTAG00000020309	G3BP1	novel.circ.000493	1076-1127	-	17.47	0.02	1	PF02136,PF00076	2	Q13283|G3BP1|33|11604510|cisBP-RNA;Q13283|G3BP1|M302_0.6|11604510|SELEX	1	0.667625
Q3MHX3	ENSBTAG00000031688	RBM4	novel.circ.001990	1222-1277	-	17.38	0.02	1	PF00076,PF13893,PF00098	4	Q9BWF3|RBM4|1146|16260624|SpliceAid-F,Q9BWF3|RBM4|1145|16777844|SpliceAid-F,Q9BWF3|RBM4|1147|21518792|SpliceAid-F	1	0.667417
Q3T0Q6	ENSBTAG00000012159	CNBP	novel.circ.000246	293-344	-	12.58	0.02	1	PF00098	7	P62633|CNBP||NA|NA	1	0.667292
Q5E9J1	ENSBTAG00000008853	HNRNPF	novel.circ.003608	201-252	-	12.51	0.01	1	PF00076,PF08080	3	P52597|HNRNPF|gukgykg|22574288|RBPMap	1	0.667083
Q2T9U1	ENSBTAG00000019085	SRP54	novel.circ.001681	170-221	-	12.47	0.01	1	PF00448,PF02978,PF02881,PF02492	4	P61011|SRP54|456|12244299|PDB	1	0.667
Q2KIV0	ENSBTAG00000051118	NOL12	novel.circ.002965	824-889	-	19.53	0	1	PF09805	1	Q9UGY1|NOL12|HepG2.NOL12.2.48|31226278|eCLIP_ENCODE	1	0.666875
Q5EA53	ENSBTAG00000021016	GTF2F1	novel.circ.002715	17-68	-	14.57	0	1	PF05793	1	P35269|GTF2F1|K562.GTF2F1.1.466|31226278|eCLIP_ENCODE,P35269|GTF2F1|HepG2.GTF2F1.1.345|31226278|eCLIP_ENCODE	1	0.66675
Q08DA1	ENSBTAG00000001246	ATP1A1	novel.circ.003863	315-366	-	120.11	5.78	1	PF00122,PF00689,PF13246,PF00702,PF00690	6	-	0	0.666667
Q08DA1	ENSBTAG00000001246	ATP1A1	novel.circ.000847	609-662	-	110.67	5.25	1	PF00122,PF00689,PF13246,PF00702,PF00690	6	-	0	0.666667
Q08DA1	ENSBTAG00000001246	ATP1A1	novel.circ.000011	51-102	-	105.69	6.52	1	PF00122,PF00689,PF13246,PF00702,PF00690	6	-	0	0.666667
Q08DA1	ENSBTAG00000001246	ATP1A1	novel.circ.002538	287-12	back-splicing_junction	104.59	6.44	1	PF00122,PF00689,PF13246,PF00702,PF00690	6	-	0	0.666667
Q08DA1	ENSBTAG00000001246	ATP1A1	novel.circ.001549	1250-1307	-	104.15	4.68	1	PF00122,PF00689,PF13246,PF00702,PF00690	6	-	0	0.666667
Q08DA1	ENSBTAG00000001246	ATP1A1	novel.circ.000493	1109-1160	-	101.58	4.74	1	PF00122,PF00689,PF13246,PF00702,PF00690	6	-	0	0.666667
Q08DA1	ENSBTAG00000001246	ATP1A1	novel.circ.003627	726-777	-	101.07	4.84	1	PF00122,PF00689,PF13246,PF00702,PF00690	6	-	0	0.666667
E1BB52	ENSBTAG00000001528	CDK13	novel.circ.003863	315-366	-	99.51	4.63	1	PF00069,PF07714	2	-	0	0.666667
Q08DA1	ENSBTAG00000001246	ATP1A1	novel.circ.004067	971-37	back-splicing_junction	99.39	4.75	1	PF00122,PF00689,PF13246,PF00702,PF00690	6	-	0	0.666667
Q08DA1	ENSBTAG00000001246	ATP1A1	novel.circ.002511	26-77	-	95.29	5.16	1	PF00122,PF00689,PF13246,PF00702,PF00690	6	-	0	0.666667
Q08DA1	ENSBTAG00000001246	ATP1A1	novel.circ.002840	222-273	-	93.71	5.7	1	PF00122,PF00689,PF13246,PF00702,PF00690	6	-	0	0.666667
Q08DA1	ENSBTAG00000001246	ATP1A1	novel.circ.001771	156-207	-	93	5.65	1	PF00122,PF00689,PF13246,PF00702,PF00690	6	-	0	0.666667
E1BB52	ENSBTAG00000001528	CDK13	novel.circ.000847	609-662	-	92.16	4.21	1	PF00069,PF07714	2	-	0	0.666667
Q08DA1	ENSBTAG00000001246	ATP1A1	novel.circ.001459	326-377	-	91.84	4.76	1	PF00122,PF00689,PF13246,PF00702,PF00690	6	-	0	0.666667
Q08DA1	ENSBTAG00000001246	ATP1A1	novel.circ.001945	151-202	-	90.42	4.1	1	PF00122,PF00689,PF13246,PF00702,PF00690	6	-	0	0.666667
Q08DA1	ENSBTAG00000001246	ATP1A1	novel.circ.003355	308-359	-	90.34	4.11	1	PF00122,PF00689,PF13246,PF00702,PF00690	6	-	0	0.666667
Q08DA1	ENSBTAG00000001246	ATP1A1	novel.circ.000597	1043-1094	-	89.3	4.05	1	PF00122,PF00689,PF13246,PF00702,PF00690	6	-	0	0.666667
Q08DA1	ENSBTAG00000001246	ATP1A1	novel.circ.001323	551-602	-	88.9	4.35	1	PF00122,PF00689,PF13246,PF00702,PF00690	6	-	0	0.666667
E1BB52	ENSBTAG00000001528	CDK13	novel.circ.000011	51-102	-	87.69	5.29	1	PF00069,PF07714	2	-	0	0.666667
E1BB52	ENSBTAG00000001528	CDK13	novel.circ.002538	287-12	back-splicing_junction	87.32	5.26	1	PF00069,PF07714	2	-	0	0.666667
Q08DA1	ENSBTAG00000001246	ATP1A1	novel.circ.002187	220-271	-	85.96	4.58	1	PF00122,PF00689,PF13246,PF00702,PF00690	6	-	0	0.666667
Q08DA1	ENSBTAG00000001246	ATP1A1	novel.circ.001469	1-52	-	85.73	5.16	1	PF00122,PF00689,PF13246,PF00702,PF00690	6	-	0	0.666667
Q08DA1	ENSBTAG00000001246	ATP1A1	novel.circ.001243	26-77	-	83.05	4.01	1	PF00122,PF00689,PF13246,PF00702,PF00690	6	-	0	0.666667
Q08DA1	ENSBTAG00000001246	ATP1A1	novel.circ.002764	178-229	-	81.49	4.14	1	PF00122,PF00689,PF13246,PF00702,PF00690	6	-	0	0.666667
Q08DA1	ENSBTAG00000001246	ATP1A1	novel.circ.002217	151-202	-	81.26	4.85	1	PF00122,PF00689,PF13246,PF00702,PF00690	6	-	0	0.666667
Q08DA1	ENSBTAG00000001246	ATP1A1	novel.circ.001853	133-184	-	80.47	4.24	1	PF00122,PF00689,PF13246,PF00702,PF00690	6	-	0	0.666667
E1BB52	ENSBTAG00000001528	CDK13	novel.circ.002511	26-77	-	80.06	4.21	1	PF00069,PF07714	2	-	0	0.666667
E1BB52	ENSBTAG00000001528	CDK13	novel.circ.002840	222-273	-	78.41	4.66	1	PF00069,PF07714	2	-	0	0.666667
Q08DA1	ENSBTAG00000001246	ATP1A1	novel.circ.003020	209-260	-	78.24	4.1	1	PF00122,PF00689,PF13246,PF00702,PF00690	6	-	0	0.666667
Q08DA1	ENSBTAG00000001246	ATP1A1	novel.circ.000246	101-152	-	77.62	4.06	1	PF00122,PF00689,PF13246,PF00702,PF00690	6	-	0	0.666667
Q08DA1	ENSBTAG00000001246	ATP1A1	novel.circ.001267	176-227	-	77.52	4.05	1	PF00122,PF00689,PF13246,PF00702,PF00690	6	-	0	0.666667
Q08DA1	ENSBTAG00000001246	ATP1A1	novel.circ.000696	176-227	-	77.35	4.04	1	PF00122,PF00689,PF13246,PF00702,PF00690	6	-	0	0.666667
E1BB52	ENSBTAG00000001528	CDK13	novel.circ.001771	156-207	-	77.06	4.57	1	PF00069,PF07714	2	-	0	0.666667
A4IFB1	ENSBTAG00000001134	SRRT	novel.circ.000011	51-102	-	74.52	4.39	1	PF04959,PF12066	2	-	0	0.666667
A4IFB1	ENSBTAG00000001134	SRRT	novel.circ.002538	287-12	back-splicing_junction	74.43	4.39	1	PF04959,PF12066	2	-	0	0.666667
Q76LV1	ENSBTAG00000000778	HSP90AB1	novel.circ.000011	51-102	-	73.74	4.34	1	PF00183,PF02518,PF13589	3	-	0	0.666667
Q08DA1	ENSBTAG00000001246	ATP1A1	novel.circ.001068	76-127	-	72.41	4.25	1	PF00122,PF00689,PF13246,PF00702,PF00690	6	-	0	0.666667
Q76LV1	ENSBTAG00000000778	HSP90AB1	novel.circ.002538	287-12	back-splicing_junction	72.3	4.24	1	PF00183,PF02518,PF13589	3	-	0	0.666667
Q08DA1	ENSBTAG00000001246	ATP1A1	novel.circ.002631	211-262	-	71.64	4.2	1	PF00122,PF00689,PF13246,PF00702,PF00690	6	-	0	0.666667
E1BB52	ENSBTAG00000001528	CDK13	novel.circ.001469	1-52	-	70.62	4.13	1	PF00069,PF07714	2	-	0	0.666667
Q08DA1	ENSBTAG00000001246	ATP1A1	novel.circ.000157	136-12	back-splicing_junction	69.46	4.22	1	PF00122,PF00689,PF13246,PF00702,PF00690	6	-	0	0.666667
Q95M18	ENSBTAG00000003362	HSP90B1	novel.circ.003863	315-366	-	105.31	4.95	1	PF00183,PF02518,PF13589	3	-	0	0.666667
A7Z061	ENSBTAG00000002726	CDC27	novel.circ.003863	315-366	-	102.34	4.79	1	PF00515,PF12895,PF07719,PF13181,PF13414,PF13432	7	-	0	0.666667
Q95M18	ENSBTAG00000003362	HSP90B1	novel.circ.000847	609-662	-	97.81	4.53	1	PF00183,PF02518,PF13589	3	-	0	0.666667
A7Z061	ENSBTAG00000002726	CDC27	novel.circ.000847	609-662	-	93.91	4.31	1	PF00515,PF12895,PF07719,PF13181,PF13414,PF13432	7	-	0	0.666667
Q95M18	ENSBTAG00000003362	HSP90B1	novel.circ.000011	51-102	-	93.14	5.66	1	PF00183,PF02518,PF13589	3	-	0	0.666667
Q95M18	ENSBTAG00000003362	HSP90B1	novel.circ.004067	971-37	back-splicing_junction	92.67	4.37	1	PF00183,PF02518,PF13589	3	-	0	0.666667
Q95M18	ENSBTAG00000003362	HSP90B1	novel.circ.000493	1109-1160	-	92.46	4.23	1	PF00183,PF02518,PF13589	3	-	0	0.666667
Q95M18	ENSBTAG00000003362	HSP90B1	novel.circ.002538	287-12	back-splicing_junction	92.25	5.6	1	PF00183,PF02518,PF13589	3	-	0	0.666667
A1A4J7	ENSBTAG00000003365	SMG8	novel.circ.003863	315-366	-	92.15	4.21	1	PF10220	1	-	0	0.666667
Q08DZ2	ENSBTAG00000002086	PRPF4B	novel.circ.003863	315-366	-	91.16	4.16	1	PF00069,PF07714	2	-	0	0.666667
A7Z061	ENSBTAG00000002726	CDC27	novel.circ.000011	51-102	-	89.7	5.43	1	PF00515,PF12895,PF07719,PF13181,PF13414,PF13432	7	-	0	0.666667
A7Z061	ENSBTAG00000002726	CDC27	novel.circ.002538	287-12	back-splicing_junction	89.2	5.39	1	PF00515,PF12895,PF07719,PF13181,PF13414,PF13432	7	-	0	0.666667
Q95M18	ENSBTAG00000003362	HSP90B1	novel.circ.003627	726-777	-	87.67	4.08	1	PF00183,PF02518,PF13589	3	-	0	0.666667
Q95M18	ENSBTAG00000003362	HSP90B1	novel.circ.002511	26-77	-	85.55	4.55	1	PF00183,PF02518,PF13589	3	-	0	0.666667
Q95M18	ENSBTAG00000003362	HSP90B1	novel.circ.002840	222-273	-	83.72	5.02	1	PF00183,PF02518,PF13589	3	-	0	0.666667
Q95M18	ENSBTAG00000003362	HSP90B1	novel.circ.001771	156-207	-	81.41	4.86	1	PF00183,PF02518,PF13589	3	-	0	0.666667
A7Z061	ENSBTAG00000002726	CDC27	novel.circ.002511	26-77	-	80.36	4.23	1	PF00515,PF12895,PF07719,PF13181,PF13414,PF13432	7	-	0	0.666667
A1A4J7	ENSBTAG00000003365	SMG8	novel.circ.000011	51-102	-	79.94	4.76	1	PF10220	1	-	0	0.666667
Q95M18	ENSBTAG00000003362	HSP90B1	novel.circ.001459	326-377	-	79.88	4.04	1	PF00183,PF02518,PF13589	3	-	0	0.666667
Q08DZ2	ENSBTAG00000002086	PRPF4B	novel.circ.000011	51-102	-	79.66	4.74	1	PF00069,PF07714	2	-	0	0.666667
A1A4J7	ENSBTAG00000003365	SMG8	novel.circ.002538	287-12	back-splicing_junction	79.6	4.74	1	PF10220	1	-	0	0.666667
A7Z061	ENSBTAG00000002726	CDC27	novel.circ.002840	222-273	-	79.42	4.73	1	PF00515,PF12895,PF07719,PF13181,PF13414,PF13432	7	-	0	0.666667
Q08DZ2	ENSBTAG00000002086	PRPF4B	novel.circ.002538	287-12	back-splicing_junction	78.99	4.7	1	PF00069,PF07714	2	-	0	0.666667
A7Z061	ENSBTAG00000002726	CDC27	novel.circ.001771	156-207	-	78.86	4.69	1	PF00515,PF12895,PF07719,PF13181,PF13414,PF13432	7	-	0	0.666667
Q95M18	ENSBTAG00000003362	HSP90B1	novel.circ.002187	220-271	-	76.68	4	1	PF00183,PF02518,PF13589	3	-	0	0.666667
Q95M18	ENSBTAG00000003362	HSP90B1	novel.circ.001469	1-52	-	74.89	4.42	1	PF00183,PF02518,PF13589	3	-	0	0.666667
Q95M18	ENSBTAG00000003362	HSP90B1	novel.circ.002217	151-202	-	73.68	4.34	1	PF00183,PF02518,PF13589	3	-	0	0.666667
A7Z061	ENSBTAG00000002726	CDC27	novel.circ.001469	1-52	-	72.52	4.26	1	PF00515,PF12895,PF07719,PF13181,PF13414,PF13432	7	-	0	0.666667
A1A4J7	ENSBTAG00000003365	SMG8	novel.circ.001771	156-207	-	70.85	4.14	1	PF10220	1	-	0	0.666667
Q17QB7	ENSBTAG00000002417	RAB30	novel.circ.001086	158-209	-	70.77	4.14	1	PF00071,PF08477,PF00025,PF04670,PF01926	5	-	0	0.666667
Q08DZ2	ENSBTAG00000002086	PRPF4B	novel.circ.002840	222-273	-	70.75	4.14	1	PF00069,PF07714	2	-	0	0.666667
A1A4J7	ENSBTAG00000003365	SMG8	novel.circ.002840	222-273	-	70.64	4.13	1	PF10220	1	-	0	0.666667
Q08DZ2	ENSBTAG00000002086	PRPF4B	novel.circ.001771	156-207	-	69.91	4.08	1	PF00069,PF07714	2	-	0	0.666667
A7Z061	ENSBTAG00000002726	CDC27	novel.circ.002217	151-202	-	69.32	4.04	1	PF00515,PF12895,PF07719,PF13181,PF13414,PF13432	7	-	0	0.666667
A4IFB6	ENSBTAG00000004834	CNOT10	novel.circ.003863	315-366	-	109.35	5.18	1	-	0	-	0	0.666667
A4IFB6	ENSBTAG00000004834	CNOT10	novel.circ.000847	609-662	-	100.26	4.67	1	-	0	-	0	0.666667
A2VDN6	ENSBTAG00000003390	SF3A1	novel.circ.003863	315-366	-	96.81	4.48	1	PF12230,PF01805,PF00240	4	-	0	0.666667
A4IFB6	ENSBTAG00000004834	CNOT10	novel.circ.000011	51-102	-	95.55	5.83	1	-	0	-	0	0.666667
A4IFB6	ENSBTAG00000004834	CNOT10	novel.circ.001549	1250-1307	-	95.02	4.18	1	-	0	-	0	0.666667
A4IFB6	ENSBTAG00000004834	CNOT10	novel.circ.002538	287-12	back-splicing_junction	94.62	5.76	1	-	0	-	0	0.666667
Q0VC73	ENSBTAG00000004930	DNAAF2	novel.circ.003863	315-366	-	94.4	4.34	1	PF08190,PF18201	2	-	0	0.666667
A4IFB6	ENSBTAG00000004834	CNOT10	novel.circ.003627	726-777	-	91.72	4.31	1	-	0	-	0	0.666667
A4IFB6	ENSBTAG00000004834	CNOT10	novel.circ.000493	1109-1160	-	91.15	4.16	1	-	0	-	0	0.666667
Q3SYU2	ENSBTAG00000004258	EEF2	novel.circ.003863	315-366	-	90.54	4.12	1	PF00009,PF03764,PF00679,PF14492,PF03144,PF01926	6	-	0	0.666667
A4IFB6	ENSBTAG00000004834	CNOT10	novel.circ.004067	971-37	back-splicing_junction	89.23	4.17	1	-	0	-	0	0.666667
A2VDN6	ENSBTAG00000003390	SF3A1	novel.circ.000847	609-662	-	88.72	4.02	1	PF12230,PF01805,PF00240	4	-	0	0.666667
A4IFB6	ENSBTAG00000004834	CNOT10	novel.circ.002511	26-77	-	85.96	4.58	1	-	0	-	0	0.666667
A2VDN6	ENSBTAG00000003390	SF3A1	novel.circ.000011	51-102	-	84.7	5.09	1	PF12230,PF01805,PF00240	4	-	0	0.666667
A4IFB6	ENSBTAG00000004834	CNOT10	novel.circ.002840	222-273	-	84.39	5.07	1	-	0	-	0	0.666667
A2VDN6	ENSBTAG00000003390	SF3A1	novel.circ.002538	287-12	back-splicing_junction	84.12	5.05	1	PF12230,PF01805,PF00240	4	-	0	0.666667
A4IFB6	ENSBTAG00000004834	CNOT10	novel.circ.001771	156-207	-	84.07	5.04	1	-	0	-	0	0.666667
Q0VC73	ENSBTAG00000004930	DNAAF2	novel.circ.000011	51-102	-	83.14	4.98	1	PF08190,PF18201	2	-	0	0.666667
A4IFB6	ENSBTAG00000004834	CNOT10	novel.circ.001459	326-377	-	82.93	4.22	1	-	0	-	0	0.666667
Q0VC73	ENSBTAG00000004930	DNAAF2	novel.circ.002538	287-12	back-splicing_junction	82.26	4.92	1	PF08190,PF18201	2	-	0	0.666667
Q3SYU2	ENSBTAG00000004258	EEF2	novel.circ.000011	51-102	-	79.06	4.7	1	PF00009,PF03764,PF00679,PF14492,PF03144,PF01926	6	-	0	0.666667
Q3SYU2	ENSBTAG00000004258	EEF2	novel.circ.002538	287-12	back-splicing_junction	78.51	4.66	1	PF00009,PF03764,PF00679,PF14492,PF03144,PF01926	6	-	0	0.666667
A4IFB6	ENSBTAG00000004834	CNOT10	novel.circ.001469	1-52	-	77.52	4.6	1	-	0	-	0	0.666667
A4IFB6	ENSBTAG00000004834	CNOT10	novel.circ.002187	220-271	-	77.43	4.05	1	-	0	-	0	0.666667
A6QLE1	ENSBTAG00000003719	TDRD7	novel.circ.000011	51-102	-	75.83	4.48	1	PF00567,PF12872	4	-	0	0.666667
A6QLE1	ENSBTAG00000003719	TDRD7	novel.circ.002538	287-12	back-splicing_junction	75.55	4.46	1	PF00567,PF12872	4	-	0	0.666667
A2VDN6	ENSBTAG00000003390	SF3A1	novel.circ.002840	222-273	-	75.39	4.45	1	PF12230,PF01805,PF00240	4	-	0	0.666667
Q0VC73	ENSBTAG00000004930	DNAAF2	novel.circ.002840	222-273	-	74.56	4.4	1	PF08190,PF18201	2	-	0	0.666667
A2VDN6	ENSBTAG00000003390	SF3A1	novel.circ.001771	156-207	-	74.46	4.39	1	PF12230,PF01805,PF00240	4	-	0	0.666667
A4IFB6	ENSBTAG00000004834	CNOT10	novel.circ.002217	151-202	-	73.71	4.34	1	-	0	-	0	0.666667
A6QP16	ENSBTAG00000003395	ZRANB1	novel.circ.000011	51-102	-	73.54	4.33	1	PF18418,PF02338,PF00641	3	-	0	0.666667
Q0VC73	ENSBTAG00000004930	DNAAF2	novel.circ.001771	156-207	-	72.93	4.29	1	PF08190,PF18201	2	-	0	0.666667
A6QP16	ENSBTAG00000003395	ZRANB1	novel.circ.002538	287-12	back-splicing_junction	72.73	4.27	1	PF18418,PF02338,PF00641	3	-	0	0.666667
Q3SYU2	ENSBTAG00000004258	EEF2	novel.circ.002840	222-273	-	70.68	4.13	1	PF00009,PF03764,PF00679,PF14492,PF03144,PF01926	6	-	0	0.666667
Q3SYU2	ENSBTAG00000004258	EEF2	novel.circ.001771	156-207	-	69.09	4.02	1	PF00009,PF03764,PF00679,PF14492,PF03144,PF01926	6	-	0	0.666667
Q05B79	ENSBTAG00000006142	DHX36	novel.circ.003863	315-366	-	117.32	5.63	1	PF04408,PF07717,PF00271,PF00270	4	-	0	0.666667
A0JN39	ENSBTAG00000006556	COPB1	novel.circ.003863	315-366	-	116.15	5.56	1	PF01602,PF07718,PF14806	3	-	0	0.666667
Q05B79	ENSBTAG00000006142	DHX36	novel.circ.001549	1233-1290	-	107.96	4.89	1	PF04408,PF07717,PF00271,PF00270	4	-	0	0.666667
Q05B79	ENSBTAG00000006142	DHX36	novel.circ.000847	609-662	-	106.01	4.99	1	PF04408,PF07717,PF00271,PF00270	4	-	0	0.666667
A0JN39	ENSBTAG00000006556	COPB1	novel.circ.000847	609-662	-	106	4.99	1	PF01602,PF07718,PF14806	3	-	0	0.666667
Q05B79	ENSBTAG00000006142	DHX36	novel.circ.001300	1280-1369	-	103.7	4.51	1	PF04408,PF07717,PF00271,PF00270	4	-	0	0.666667
A6QQR4	ENSBTAG00000005607	ERCC6L	novel.circ.003863	315-366	-	102.7	4.81	1	PF00176,PF00271,PF04851	3	-	0	0.666667
Q05B79	ENSBTAG00000006142	DHX36	novel.circ.000011	51-102	-	101.55	6.24	1	PF04408,PF07717,PF00271,PF00270	4	-	0	0.666667
A0JN39	ENSBTAG00000006556	COPB1	novel.circ.001549	1250-1307	-	101.02	4.51	1	PF01602,PF07718,PF14806	3	-	0	0.666667
A0JN39	ENSBTAG00000006556	COPB1	novel.circ.000011	51-102	-	100.9	6.19	1	PF01602,PF07718,PF14806	3	-	0	0.666667
Q05B79	ENSBTAG00000006142	DHX36	novel.circ.002538	287-12	back-splicing_junction	100.52	6.16	1	PF04408,PF07717,PF00271,PF00270	4	-	0	0.666667
A0JN39	ENSBTAG00000006556	COPB1	novel.circ.002538	287-12	back-splicing_junction	100.31	6.15	1	PF01602,PF07718,PF14806	3	-	0	0.666667
Q05B79	ENSBTAG00000006142	DHX36	novel.circ.003627	726-777	-	99.06	4.73	1	PF04408,PF07717,PF00271,PF00270	4	-	0	0.666667
A0JN39	ENSBTAG00000006556	COPB1	novel.circ.003627	726-777	-	97.09	4.62	1	PF01602,PF07718,PF14806	3	-	0	0.666667
A0JN39	ENSBTAG00000006556	COPB1	novel.circ.000493	1109-1160	-	96.62	4.46	1	PF01602,PF07718,PF14806	3	-	0	0.666667
A0JN39	ENSBTAG00000006556	COPB1	novel.circ.004067	971-37	back-splicing_junction	94.92	4.5	1	PF01602,PF07718,PF14806	3	-	0	0.666667
A6QQR4	ENSBTAG00000005607	ERCC6L	novel.circ.000847	609-662	-	94.44	4.34	1	PF00176,PF00271,PF04851	3	-	0	0.666667
Q05B79	ENSBTAG00000006142	DHX36	novel.circ.000493	1109-1160	-	94.41	4.34	1	PF04408,PF07717,PF00271,PF00270	4	-	0	0.666667
Q1RMU5	ENSBTAG00000006330	RBM5	novel.circ.003863	315-366	-	93.85	4.31	1	PF01585,PF17780,PF00076,PF00641,PF12656	5	-	0	0.666667
Q05B79	ENSBTAG00000006142	DHX36	novel.circ.004067	971-37	back-splicing_junction	91.77	4.32	1	PF04408,PF07717,PF00271,PF00270	4	-	0	0.666667
P20004	ENSBTAG00000006429	ACO2	novel.circ.003863	315-366	-	91.66	4.19	1	PF00330,PF00694	2	-	0	0.666667
Q05B79	ENSBTAG00000006142	DHX36	novel.circ.002511	13-64	-	91.32	4.91	1	PF04408,PF07717,PF00271,PF00270	4	-	0	0.666667
A0JN39	ENSBTAG00000006556	COPB1	novel.circ.002511	26-77	-	91.09	4.9	1	PF01602,PF07718,PF14806	3	-	0	0.666667
Q05B79	ENSBTAG00000006142	DHX36	novel.circ.001323	551-602	-	90.95	4.47	1	PF04408,PF07717,PF00271,PF00270	4	-	0	0.666667
Q05B79	ENSBTAG00000006142	DHX36	novel.circ.001771	151-202	-	90.72	5.5	1	PF04408,PF07717,PF00271,PF00270	4	-	0	0.666667
Q05B79	ENSBTAG00000006142	DHX36	novel.circ.001945	151-202	-	90.72	4.12	1	PF04408,PF07717,PF00271,PF00270	4	-	0	0.666667
Q3SYW6	ENSBTAG00000006543	EIF3CL	novel.circ.003863	315-366	-	90.19	4.11	1	PF05470,PF01399	2	-	0	0.666667
A6QQR4	ENSBTAG00000005607	ERCC6L	novel.circ.000011	51-102	-	90.07	5.45	1	PF00176,PF00271,PF04851	3	-	0	0.666667
A0JN39	ENSBTAG00000006556	COPB1	novel.circ.002840	222-273	-	89.34	5.4	1	PF01602,PF07718,PF14806	3	-	0	0.666667
A6QQR4	ENSBTAG00000005607	ERCC6L	novel.circ.002538	287-12	back-splicing_junction	89.26	5.4	1	PF00176,PF00271,PF04851	3	-	0	0.666667
Q05B79	ENSBTAG00000006142	DHX36	novel.circ.002840	222-273	-	89.25	5.4	1	PF04408,PF07717,PF00271,PF00270	4	-	0	0.666667
A1A4H6	ENSBTAG00000006671	DDX27	novel.circ.003863	315-366	-	88.84	4.03	1	PF00270,PF00271,PF04851	3	-	0	0.666667
A0JN39	ENSBTAG00000006556	COPB1	novel.circ.001771	156-207	-	88.75	5.36	1	PF01602,PF07718,PF14806	3	-	0	0.666667
Q2T9U5	ENSBTAG00000006449	REXO5	novel.circ.003863	315-366	-	88.64	4.02	1	PF00076,PF00929	2	-	0	0.666667
Q05B79	ENSBTAG00000006142	DHX36	novel.circ.001459	326-377	-	87.85	4.52	1	PF04408,PF07717,PF00271,PF00270	4	-	0	0.666667
A0JN39	ENSBTAG00000006556	COPB1	novel.circ.001459	326-377	-	87.4	4.5	1	PF01602,PF07718,PF14806	3	-	0	0.666667
A6QQR4	ENSBTAG00000005607	ERCC6L	novel.circ.004067	971-37	back-splicing_junction	86.99	4.04	1	PF00176,PF00271,PF04851	3	-	0	0.666667
A0JN39	ENSBTAG00000006556	COPB1	novel.circ.001323	551-602	-	86.01	4.18	1	PF01602,PF07718,PF14806	3	-	0	0.666667
Q05B79	ENSBTAG00000006142	DHX36	novel.circ.001469	1-52	-	82.67	4.95	1	PF04408,PF07717,PF00271,PF00270	4	-	0	0.666667
A0JN39	ENSBTAG00000006556	COPB1	novel.circ.002187	220-271	-	82.22	4.34	1	PF01602,PF07718,PF14806	3	-	0	0.666667
A0JN39	ENSBTAG00000006556	COPB1	novel.circ.001469	1-52	-	82.03	4.91	1	PF01602,PF07718,PF14806	3	-	0	0.666667
Q1RMU5	ENSBTAG00000006330	RBM5	novel.circ.000011	51-102	-	81.92	4.9	1	PF01585,PF17780,PF00076,PF00641,PF12656	5	-	0	0.666667
Q05B79	ENSBTAG00000006142	DHX36	novel.circ.002187	220-271	-	81.65	4.31	1	PF04408,PF07717,PF00271,PF00270	4	-	0	0.666667
A6QQR4	ENSBTAG00000005607	ERCC6L	novel.circ.002511	26-77	-	81.62	4.31	1	PF00176,PF00271,PF04851	3	-	0	0.666667
Q1RMU5	ENSBTAG00000006330	RBM5	novel.circ.002538	287-12	back-splicing_junction	81.42	4.86	1	PF01585,PF17780,PF00076,PF00641,PF12656	5	-	0	0.666667
P20004	ENSBTAG00000006429	ACO2	novel.circ.000011	51-102	-	80.33	4.79	1	PF00330,PF00694	2	-	0	0.666667
A6QQR4	ENSBTAG00000005607	ERCC6L	novel.circ.002840	222-273	-	80.1	4.77	1	PF00176,PF00271,PF04851	3	-	0	0.666667
P20004	ENSBTAG00000006429	ACO2	novel.circ.002538	287-12	back-splicing_junction	79.21	4.71	1	PF00330,PF00694	2	-	0	0.666667
A6QQR4	ENSBTAG00000005607	ERCC6L	novel.circ.001771	156-207	-	78.98	4.7	1	PF00176,PF00271,PF04851	3	-	0	0.666667
A1A4H6	ENSBTAG00000006671	DDX27	novel.circ.000011	51-102	-	78.63	4.67	1	PF00270,PF00271,PF04851	3	-	0	0.666667
Q3SYW6	ENSBTAG00000006543	EIF3CL	novel.circ.000011	51-102	-	78.62	4.67	1	PF05470,PF01399	2	-	0	0.666667
A0JN39	ENSBTAG00000006556	COPB1	novel.circ.002217	151-202	-	78.28	4.65	1	PF01602,PF07718,PF14806	3	-	0	0.666667
Q3SYW6	ENSBTAG00000006543	EIF3CL	novel.circ.002538	287-12	back-splicing_junction	78.19	4.64	1	PF05470,PF01399	2	-	0	0.666667
Q2T9U5	ENSBTAG00000006449	REXO5	novel.circ.000011	51-102	-	78.1	4.64	1	PF00076,PF00929	2	-	0	0.666667
A1A4H6	ENSBTAG00000006671	DDX27	novel.circ.002538	287-12	back-splicing_junction	77.52	4.6	1	PF00270,PF00271,PF04851	3	-	0	0.666667
Q05B79	ENSBTAG00000006142	DHX36	novel.circ.002217	151-202	-	77.14	4.57	1	PF04408,PF07717,PF00271,PF00270	4	-	0	0.666667
Q2T9U5	ENSBTAG00000006449	REXO5	novel.circ.002538	287-12	back-splicing_junction	77.1	4.57	1	PF00076,PF00929	2	-	0	0.666667
A0JN39	ENSBTAG00000006556	COPB1	novel.circ.001853	133-184	-	76.92	4.02	1	PF01602,PF07718,PF14806	3	-	0	0.666667
Q05B79	ENSBTAG00000006142	DHX36	novel.circ.000696	6-57	-	76.7	4	1	PF04408,PF07717,PF00271,PF00270	4	-	0	0.666667
Q05B79	ENSBTAG00000006142	DHX36	novel.circ.002631	211-262	-	76.06	4.5	1	PF04408,PF07717,PF00271,PF00270	4	-	0	0.666667
A6QQR4	ENSBTAG00000005607	ERCC6L	novel.circ.001469	1-52	-	72.79	4.28	1	PF00176,PF00271,PF04851	3	-	0	0.666667
Q1RMU5	ENSBTAG00000006330	RBM5	novel.circ.002840	222-273	-	72.3	4.24	1	PF01585,PF17780,PF00076,PF00641,PF12656	5	-	0	0.666667
Q1RMU5	ENSBTAG00000006330	RBM5	novel.circ.001771	156-207	-	72.01	4.22	1	PF01585,PF17780,PF00076,PF00641,PF12656	5	-	0	0.666667
Q05B79	ENSBTAG00000006142	DHX36	novel.circ.001068	76-127	-	71.2	4.17	1	PF04408,PF07717,PF00271,PF00270	4	-	0	0.666667
P20004	ENSBTAG00000006429	ACO2	novel.circ.002840	222-273	-	71.02	4.16	1	PF00330,PF00694	2	-	0	0.666667
Q2KI62	ENSBTAG00000006482	PTCD3	novel.circ.000011	51-102	-	70.74	4.14	1	PF13041,PF13812	3	-	0	0.666667
A1A4H6	ENSBTAG00000006671	DDX27	novel.circ.002840	222-273	-	70.44	4.12	1	PF00270,PF00271,PF04851	3	-	0	0.666667
A6QQR4	ENSBTAG00000005607	ERCC6L	novel.circ.002217	151-202	-	70.44	4.12	1	PF00176,PF00271,PF04851	3	-	0	0.666667
P20004	ENSBTAG00000006429	ACO2	novel.circ.001771	156-207	-	70.26	4.1	1	PF00330,PF00694	2	-	0	0.666667
Q3SYW6	ENSBTAG00000006543	EIF3CL	novel.circ.002840	222-273	-	69.97	4.08	1	PF05470,PF01399	2	-	0	0.666667
A0JN39	ENSBTAG00000006556	COPB1	novel.circ.002631	211-262	-	69.96	4.08	1	PF01602,PF07718,PF14806	3	-	0	0.666667
Q2KI62	ENSBTAG00000006482	PTCD3	novel.circ.002538	287-12	back-splicing_junction	69.91	4.08	1	PF13041,PF13812	3	-	0	0.666667
A0JN39	ENSBTAG00000006556	COPB1	novel.circ.001068	76-127	-	69.83	4.07	1	PF01602,PF07718,PF14806	3	-	0	0.666667
Q2T9U5	ENSBTAG00000006449	REXO5	novel.circ.002840	222-273	-	69.65	4.06	1	PF00076,PF00929	2	-	0	0.666667
Q3SYW6	ENSBTAG00000006543	EIF3CL	novel.circ.001771	156-207	-	68.98	4.02	1	PF05470,PF01399	2	-	0	0.666667
A0JN39	ENSBTAG00000006556	COPB1	novel.circ.000157	136-12	back-splicing_junction	66.47	4.01	1	PF01602,PF07718,PF14806	3	-	0	0.666667
A4IF63	ENSBTAG00000008816	TRIM2	novel.circ.003863	315-366	-	103.77	4.87	1	PF01436,PF17170,PF00630,PF00643,PF13445,PF13923,PF00097,PF13920,PF14634,PF13639	15	-	0	0.666667
Q3SYU7	ENSBTAG00000007979	TNPO1	novel.circ.003863	315-366	-	102.04	4.77	1	PF13513,PF03810	2	-	0	0.666667
A4IF63	ENSBTAG00000008816	TRIM2	novel.circ.000847	609-662	-	94.64	4.35	1	PF01436,PF17170,PF00630,PF00643,PF13445,PF13923,PF00097,PF13920,PF14634,PF13639	15	-	0	0.666667
Q3SYU7	ENSBTAG00000007979	TNPO1	novel.circ.000847	609-662	-	92.5	4.23	1	PF13513,PF03810	2	-	0	0.666667
A4IF63	ENSBTAG00000008816	TRIM2	novel.circ.001549	1250-1307	-	92.32	4.04	1	PF01436,PF17170,PF00630,PF00643,PF13445,PF13923,PF00097,PF13920,PF14634,PF13639	15	-	0	0.666667
A6QNM8	ENSBTAG00000007651	TARS3	novel.circ.003863	315-366	-	90.26	4.11	1	PF00587,PF02824,PF07973	3	-	0	0.666667
A4IF63	ENSBTAG00000008816	TRIM2	novel.circ.000011	51-102	-	90.2	5.46	1	PF01436,PF17170,PF00630,PF00643,PF13445,PF13923,PF00097,PF13920,PF14634,PF13639	15	-	0	0.666667
A4IF63	ENSBTAG00000008816	TRIM2	novel.circ.002538	287-12	back-splicing_junction	89.54	5.42	1	PF01436,PF17170,PF00630,PF00643,PF13445,PF13923,PF00097,PF13920,PF14634,PF13639	15	-	0	0.666667
Q3SYU7	ENSBTAG00000007979	TNPO1	novel.circ.000011	51-102	-	88.18	5.32	1	PF13513,PF03810	2	-	0	0.666667
Q3SYU7	ENSBTAG00000007979	TNPO1	novel.circ.002538	287-12	back-splicing_junction	87.59	5.28	1	PF13513,PF03810	2	-	0	0.666667
A4IF63	ENSBTAG00000008816	TRIM2	novel.circ.003627	726-777	-	87.15	4.05	1	PF01436,PF17170,PF00630,PF00643,PF13445,PF13923,PF00097,PF13920,PF14634,PF13639	15	-	0	0.666667
A4IF63	ENSBTAG00000008816	TRIM2	novel.circ.002511	26-77	-	80.84	4.26	1	PF01436,PF17170,PF00630,PF00643,PF13445,PF13923,PF00097,PF13920,PF14634,PF13639	15	-	0	0.666667
A4IF63	ENSBTAG00000008816	TRIM2	novel.circ.002840	222-273	-	79.76	4.75	1	PF01436,PF17170,PF00630,PF00643,PF13445,PF13923,PF00097,PF13920,PF14634,PF13639	15	-	0	0.666667
A4IF63	ENSBTAG00000008816	TRIM2	novel.circ.001771	156-207	-	79.7	4.75	1	PF01436,PF17170,PF00630,PF00643,PF13445,PF13923,PF00097,PF13920,PF14634,PF13639	15	-	0	0.666667
A6QNM8	ENSBTAG00000007651	TARS3	novel.circ.000011	51-102	-	79.35	4.72	1	PF00587,PF02824,PF07973	3	-	0	0.666667
Q3SYU7	ENSBTAG00000007979	TNPO1	novel.circ.002511	26-77	-	78.81	4.13	1	PF13513,PF03810	2	-	0	0.666667
A6QNM8	ENSBTAG00000007651	TARS3	novel.circ.002538	287-12	back-splicing_junction	77.87	4.62	1	PF00587,PF02824,PF07973	3	-	0	0.666667
Q3SYU7	ENSBTAG00000007979	TNPO1	novel.circ.001771	156-207	-	77.58	4.6	1	PF13513,PF03810	2	-	0	0.666667
Q3SYU7	ENSBTAG00000007979	TNPO1	novel.circ.002840	222-273	-	77.49	4.59	1	PF13513,PF03810	2	-	0	0.666667
Q0P5G1	ENSBTAG00000007749	TONSL	novel.circ.000011	51-102	-	74.56	4.4	1	PF12796,PF00023,PF13857,PF13637,PF13606	8	-	0	0.666667
Q0P5G1	ENSBTAG00000007749	TONSL	novel.circ.002538	287-12	back-splicing_junction	73.98	4.36	1	PF12796,PF00023,PF13857,PF13637,PF13606	8	-	0	0.666667
A4IF63	ENSBTAG00000008816	TRIM2	novel.circ.001469	1-52	-	73.41	4.32	1	PF01436,PF17170,PF00630,PF00643,PF13445,PF13923,PF00097,PF13920,PF14634,PF13639	15	-	0	0.666667
Q3SYU7	ENSBTAG00000007979	TNPO1	novel.circ.001469	1-52	-	71.67	4.2	1	PF13513,PF03810	2	-	0	0.666667
Q1RMG8	ENSBTAG00000008642	POLR1D	novel.circ.001086	158-209	-	71.09	4.16	1	PF13656,PF01193	2	-	0	0.666667
A6QNM8	ENSBTAG00000007651	TARS3	novel.circ.002840	222-273	-	70.18	4.1	1	PF00587,PF02824,PF07973	3	-	0	0.666667
A4IF63	ENSBTAG00000008816	TRIM2	novel.circ.002217	151-202	-	69.4	4.04	1	PF01436,PF17170,PF00630,PF00643,PF13445,PF13923,PF00097,PF13920,PF14634,PF13639	15	-	0	0.666667
A6QNM8	ENSBTAG00000007651	TARS3	novel.circ.001771	156-207	-	69.14	4.03	1	PF00587,PF02824,PF07973	3	-	0	0.666667
A2VDP1	ENSBTAG00000009516	RNF20	novel.circ.003863	315-366	-	124.03	6	1	PF13920,PF00097	2	-	0	0.666667
A2VDL6	ENSBTAG00000010551	ATP1A2	novel.circ.003863	315-366	-	123.67	5.98	1	PF00122,PF00689,PF13246,PF00702,PF00690	5	-	0	0.666667
Q3ZC55	ENSBTAG00000009696	ACTN2	novel.circ.003863	315-366	-	122.65	5.93	1	PF00435,PF00307,PF08726,PF11971	8	-	0	0.666667
A2VDL6	ENSBTAG00000010551	ATP1A2	novel.circ.000847	609-662	-	113.84	5.43	1	PF00122,PF00689,PF13246,PF00702,PF00690	5	-	0	0.666667
A2VDP1	ENSBTAG00000009516	RNF20	novel.circ.000847	609-662	-	112.98	5.38	1	PF13920,PF00097	2	-	0	0.666667
Q3ZC55	ENSBTAG00000009696	ACTN2	novel.circ.000847	609-662	-	112.58	5.36	1	PF00435,PF00307,PF08726,PF11971	8	-	0	0.666667
A2VDL6	ENSBTAG00000010551	ATP1A2	novel.circ.000011	51-102	-	108.92	6.74	1	PF00122,PF00689,PF13246,PF00702,PF00690	5	-	0	0.666667
A2VDP1	ENSBTAG00000009516	RNF20	novel.circ.001549	1250-1307	-	108.48	4.92	1	PF13920,PF00097	2	-	0	0.666667
A2VDP1	ENSBTAG00000009516	RNF20	novel.circ.000011	51-102	-	108.24	6.69	1	PF13920,PF00097	2	-	0	0.666667
A2VDL6	ENSBTAG00000010551	ATP1A2	novel.circ.002538	287-12	back-splicing_junction	107.77	6.66	1	PF00122,PF00689,PF13246,PF00702,PF00690	5	-	0	0.666667
Q3ZC55	ENSBTAG00000009696	ACTN2	novel.circ.000011	51-102	-	107.69	6.65	1	PF00435,PF00307,PF08726,PF11971	8	-	0	0.666667
A2VDP1	ENSBTAG00000009516	RNF20	novel.circ.002538	287-12	back-splicing_junction	107.47	6.64	1	PF13920,PF00097	2	-	0	0.666667
A2VDL6	ENSBTAG00000010551	ATP1A2	novel.circ.001549	1250-1307	-	107.35	4.86	1	PF00122,PF00689,PF13246,PF00702,PF00690	5	-	0	0.666667
Q3ZC55	ENSBTAG00000009696	ACTN2	novel.circ.002538	287-12	back-splicing_junction	106.36	6.56	1	PF00435,PF00307,PF08726,PF11971	8	-	0	0.666667
Q3ZC55	ENSBTAG00000009696	ACTN2	novel.circ.001549	1250-1307	-	106.21	4.8	1	PF00435,PF00307,PF08726,PF11971	8	-	0	0.666667
A2VDL6	ENSBTAG00000010551	ATP1A2	novel.circ.000493	1109-1160	-	104.48	4.91	1	PF00122,PF00689,PF13246,PF00702,PF00690	5	-	0	0.666667
A7MBJ5	ENSBTAG00000009939	CAND1	novel.circ.003863	315-366	-	104.29	4.9	1	PF08623	1	-	0	0.666667
A2VDL6	ENSBTAG00000010551	ATP1A2	novel.circ.003627	726-777	-	104.16	5.02	1	PF00122,PF00689,PF13246,PF00702,PF00690	5	-	0	0.666667
A2VDP1	ENSBTAG00000009516	RNF20	novel.circ.003627	726-777	-	104.11	5.02	1	PF13920,PF00097	2	-	0	0.666667
A2VDP1	ENSBTAG00000009516	RNF20	novel.circ.000493	1109-1160	-	103.24	4.84	1	PF13920,PF00097	2	-	0	0.666667
Q3ZC55	ENSBTAG00000009696	ACTN2	novel.circ.000493	1109-1160	-	103.16	4.83	1	PF00435,PF00307,PF08726,PF11971	8	-	0	0.666667
Q3ZC55	ENSBTAG00000009696	ACTN2	novel.circ.003627	726-777	-	102.97	4.95	1	PF00435,PF00307,PF08726,PF11971	8	-	0	0.666667
A2VDL6	ENSBTAG00000010551	ATP1A2	novel.circ.004067	971-37	back-splicing_junction	101.99	4.9	1	PF00122,PF00689,PF13246,PF00702,PF00690	5	-	0	0.666667
A2VDP1	ENSBTAG00000009516	RNF20	novel.circ.004067	971-37	back-splicing_junction	101.55	4.87	1	PF13920,PF00097	2	-	0	0.666667
Q3ZC55	ENSBTAG00000009696	ACTN2	novel.circ.004067	971-37	back-splicing_junction	100.81	4.83	1	PF00435,PF00307,PF08726,PF11971	8	-	0	0.666667
A2VDL6	ENSBTAG00000010551	ATP1A2	novel.circ.002511	26-77	-	98.04	5.33	1	PF00122,PF00689,PF13246,PF00702,PF00690	5	-	0	0.666667
Q0IIK5	ENSBTAG00000009906	DDX1	novel.circ.003863	315-366	-	97.37	4.51	1	PF00270,PF00271,PF00622	3	-	0	0.666667
A2VDP1	ENSBTAG00000009516	RNF20	novel.circ.002511	26-77	-	97.05	5.27	1	PF13920,PF00097	2	-	0	0.666667
Q3ZC55	ENSBTAG00000009696	ACTN2	novel.circ.002511	26-77	-	96.77	5.25	1	PF00435,PF00307,PF08726,PF11971	8	-	0	0.666667
A2VDL6	ENSBTAG00000010551	ATP1A2	novel.circ.002840	222-273	-	96.51	5.89	1	PF00122,PF00689,PF13246,PF00702,PF00690	5	-	0	0.666667
A7MBJ5	ENSBTAG00000009939	CAND1	novel.circ.000847	609-662	-	95.98	4.43	1	PF08623	1	-	0	0.666667
A2VDL6	ENSBTAG00000010551	ATP1A2	novel.circ.001771	156-207	-	95.79	5.84	1	PF00122,PF00689,PF13246,PF00702,PF00690	5	-	0	0.666667
A2VDP1	ENSBTAG00000009516	RNF20	novel.circ.002840	222-273	-	95.53	5.82	1	PF13920,PF00097	2	-	0	0.666667
Q3ZC55	ENSBTAG00000009696	ACTN2	novel.circ.002840	222-273	-	95.24	5.8	1	PF00435,PF00307,PF08726,PF11971	8	-	0	0.666667
A2VDP1	ENSBTAG00000009516	RNF20	novel.circ.001771	156-207	-	95.23	5.8	1	PF13920,PF00097	2	-	0	0.666667
Q3ZC55	ENSBTAG00000009696	ACTN2	novel.circ.001771	156-207	-	94.8	5.78	1	PF00435,PF00307,PF08726,PF11971	8	-	0	0.666667
A2VDL6	ENSBTAG00000010551	ATP1A2	novel.circ.001459	326-377	-	94.59	4.93	1	PF00122,PF00689,PF13246,PF00702,PF00690	5	-	0	0.666667
A2VDP1	ENSBTAG00000009516	RNF20	novel.circ.001459	326-377	-	93.49	4.87	1	PF13920,PF00097	2	-	0	0.666667
A2VDP1	ENSBTAG00000009516	RNF20	novel.circ.001945	151-202	-	93.32	4.26	1	PF13920,PF00097	2	-	0	0.666667
A2VDL6	ENSBTAG00000010551	ATP1A2	novel.circ.001945	151-202	-	93.23	4.26	1	PF00122,PF00689,PF13246,PF00702,PF00690	5	-	0	0.666667
Q3ZC55	ENSBTAG00000009696	ACTN2	novel.circ.001459	326-377	-	93.16	4.84	1	PF00435,PF00307,PF08726,PF11971	8	-	0	0.666667
A2VDL6	ENSBTAG00000010551	ATP1A2	novel.circ.003355	308-359	-	92.73	4.25	1	PF00122,PF00689,PF13246,PF00702,PF00690	5	-	0	0.666667
A2VDP1	ENSBTAG00000009516	RNF20	novel.circ.001323	551-602	-	92.58	4.57	1	PF13920,PF00097	2	-	0	0.666667
Q3ZC55	ENSBTAG00000009696	ACTN2	novel.circ.001945	151-202	-	92.45	4.21	1	PF00435,PF00307,PF08726,PF11971	8	-	0	0.666667
A2VDP1	ENSBTAG00000009516	RNF20	novel.circ.003355	308-359	-	92.16	4.21	1	PF13920,PF00097	2	-	0	0.666667
Q3ZC55	ENSBTAG00000009696	ACTN2	novel.circ.003355	308-359	-	92.1	4.21	1	PF00435,PF00307,PF08726,PF11971	8	-	0	0.666667
A2VDP1	ENSBTAG00000009516	RNF20	novel.circ.000597	1043-1094	-	92.06	4.21	1	PF13920,PF00097	2	-	0	0.666667
A2VDL6	ENSBTAG00000010551	ATP1A2	novel.circ.000597	1043-1094	-	91.97	4.2	1	PF00122,PF00689,PF13246,PF00702,PF00690	5	-	0	0.666667
A7MBJ5	ENSBTAG00000009939	CAND1	novel.circ.000011	51-102	-	91.67	5.56	1	PF08623	1	-	0	0.666667
A2VDL6	ENSBTAG00000010551	ATP1A2	novel.circ.001323	551-602	-	91.65	4.51	1	PF00122,PF00689,PF13246,PF00702,PF00690	5	-	0	0.666667
Q3ZC55	ENSBTAG00000009696	ACTN2	novel.circ.000597	1043-1094	-	91.31	4.17	1	PF00435,PF00307,PF08726,PF11971	8	-	0	0.666667
Q3ZC55	ENSBTAG00000009696	ACTN2	novel.circ.001323	551-602	-	91.25	4.49	1	PF00435,PF00307,PF08726,PF11971	8	-	0	0.666667
A7MBJ5	ENSBTAG00000009939	CAND1	novel.circ.002538	287-12	back-splicing_junction	90.56	5.49	1	PF08623	1	-	0	0.666667
Q10568	ENSBTAG00000010227	CPSF2	novel.circ.003863	315-366	-	90.05	4.1	1	PF16661,PF13299,PF10996,PF07521,PF00753	5	-	0	0.666667
Q0IIK5	ENSBTAG00000009906	DDX1	novel.circ.000847	609-662	-	89.34	4.06	1	PF00270,PF00271,PF00622	3	-	0	0.666667
A7MBJ5	ENSBTAG00000009939	CAND1	novel.circ.000493	1109-1160	-	88.6	4.01	1	PF08623	1	-	0	0.666667
A2VDL6	ENSBTAG00000010551	ATP1A2	novel.circ.002187	220-271	-	88.39	4.73	1	PF00122,PF00689,PF13246,PF00702,PF00690	5	-	0	0.666667
A2VDL6	ENSBTAG00000010551	ATP1A2	novel.circ.001469	1-52	-	88.38	5.34	1	PF00122,PF00689,PF13246,PF00702,PF00690	5	-	0	0.666667
A2VDP1	ENSBTAG00000009516	RNF20	novel.circ.002187	220-271	-	87.74	4.69	1	PF13920,PF00097	2	-	0	0.666667
A2VDP1	ENSBTAG00000009516	RNF20	novel.circ.001469	1-52	-	87.63	5.29	1	PF13920,PF00097	2	-	0	0.666667
Q3ZC55	ENSBTAG00000009696	ACTN2	novel.circ.002187	220-271	-	87.44	4.67	1	PF00435,PF00307,PF08726,PF11971	8	-	0	0.666667
A7MBJ5	ENSBTAG00000009939	CAND1	novel.circ.004067	971-37	back-splicing_junction	87.42	4.07	1	PF08623	1	-	0	0.666667
A2VDP1	ENSBTAG00000009516	RNF20	novel.circ.000408	830-12	back-splicing_junction	87.17	4.18	1	PF13920,PF00097	2	-	0	0.666667
A7MBJ5	ENSBTAG00000009939	CAND1	novel.circ.003627	726-777	-	87.17	4.05	1	PF08623	1	-	0	0.666667
Q3ZC55	ENSBTAG00000009696	ACTN2	novel.circ.001469	1-52	-	87.07	5.25	1	PF00435,PF00307,PF08726,PF11971	8	-	0	0.666667
A2VDL6	ENSBTAG00000010551	ATP1A2	novel.circ.000408	830-12	back-splicing_junction	86.48	4.14	1	PF00122,PF00689,PF13246,PF00702,PF00690	5	-	0	0.666667
Q3ZC55	ENSBTAG00000009696	ACTN2	novel.circ.000408	830-12	back-splicing_junction	85.56	4.08	1	PF00435,PF00307,PF08726,PF11971	8	-	0	0.666667
A2VDL6	ENSBTAG00000010551	ATP1A2	novel.circ.001243	26-77	-	85.24	4.14	1	PF00122,PF00689,PF13246,PF00702,PF00690	5	-	0	0.666667
Q0IIK5	ENSBTAG00000009906	DDX1	novel.circ.000011	51-102	-	85.18	5.12	1	PF00270,PF00271,PF00622	3	-	0	0.666667
A2VDP1	ENSBTAG00000009516	RNF20	novel.circ.001243	101-152	-	85.11	4.13	1	PF13920,PF00097	2	-	0	0.666667
Q3ZC55	ENSBTAG00000009696	ACTN2	novel.circ.001243	26-77	-	84.94	4.12	1	PF00435,PF00307,PF08726,PF11971	8	-	0	0.666667
Q0IIK5	ENSBTAG00000009906	DDX1	novel.circ.002538	287-12	back-splicing_junction	84.16	5.05	1	PF00270,PF00271,PF00622	3	-	0	0.666667
A2VDL6	ENSBTAG00000010551	ATP1A2	novel.circ.002217	151-202	-	83.64	5.01	1	PF00122,PF00689,PF13246,PF00702,PF00690	5	-	0	0.666667
A2VDP1	ENSBTAG00000009516	RNF20	novel.circ.002217	151-202	-	83.64	5.01	1	PF13920,PF00097	2	-	0	0.666667
A2VDL6	ENSBTAG00000010551	ATP1A2	novel.circ.002764	178-229	-	83.55	4.26	1	PF00122,PF00689,PF13246,PF00702,PF00690	5	-	0	0.666667
A2VDL6	ENSBTAG00000010551	ATP1A2	novel.circ.001853	133-184	-	82.74	4.38	1	PF00122,PF00689,PF13246,PF00702,PF00690	5	-	0	0.666667
A7MBJ5	ENSBTAG00000009939	CAND1	novel.circ.002511	26-77	-	82.69	4.37	1	PF08623	1	-	0	0.666667
A2VDP1	ENSBTAG00000009516	RNF20	novel.circ.002764	178-229	-	82.65	4.21	1	PF13920,PF00097	2	-	0	0.666667
Q3ZC55	ENSBTAG00000009696	ACTN2	novel.circ.002764	178-229	-	82.58	4.2	1	PF00435,PF00307,PF08726,PF11971	8	-	0	0.666667
Q3ZC55	ENSBTAG00000009696	ACTN2	novel.circ.002217	151-202	-	82.47	4.93	1	PF00435,PF00307,PF08726,PF11971	8	-	0	0.666667
A2VDP1	ENSBTAG00000009516	RNF20	novel.circ.001853	133-184	-	82.3	4.35	1	PF13920,PF00097	2	-	0	0.666667
Q3ZC55	ENSBTAG00000009696	ACTN2	novel.circ.001853	133-184	-	81.7	4.31	1	PF00435,PF00307,PF08726,PF11971	8	-	0	0.666667
A7MBJ5	ENSBTAG00000009939	CAND1	novel.circ.002840	222-273	-	81.24	4.85	1	PF08623	1	-	0	0.666667
A2VDL6	ENSBTAG00000010551	ATP1A2	novel.circ.003020	209-260	-	80.37	4.23	1	PF00122,PF00689,PF13246,PF00702,PF00690	5	-	0	0.666667
A7MBJ5	ENSBTAG00000009939	CAND1	novel.circ.001771	156-207	-	80.29	4.79	1	PF08623	1	-	0	0.666667
A2VDP1	ENSBTAG00000009516	RNF20	novel.circ.000246	101-152	-	80.25	4.22	1	PF13920,PF00097	2	-	0	0.666667
A2VDL6	ENSBTAG00000010551	ATP1A2	novel.circ.000224	522-12	back-splicing_junction	80.17	4.05	1	PF00122,PF00689,PF13246,PF00702,PF00690	5	-	0	0.666667
A2VDL6	ENSBTAG00000010551	ATP1A2	novel.circ.000246	101-152	-	79.8	4.2	1	PF00122,PF00689,PF13246,PF00702,PF00690	5	-	0	0.666667
A2VDP1	ENSBTAG00000009516	RNF20	novel.circ.000696	176-227	-	79.77	4.19	1	PF13920,PF00097	2	-	0	0.666667
A2VDL6	ENSBTAG00000010551	ATP1A2	novel.circ.000696	176-227	-	79.67	4.19	1	PF00122,PF00689,PF13246,PF00702,PF00690	5	-	0	0.666667
A2VDL6	ENSBTAG00000010551	ATP1A2	novel.circ.001267	176-227	-	79.62	4.18	1	PF00122,PF00689,PF13246,PF00702,PF00690	5	-	0	0.666667
Q3ZC55	ENSBTAG00000009696	ACTN2	novel.circ.000246	101-152	-	79.59	4.18	1	PF00435,PF00307,PF08726,PF11971	8	-	0	0.666667
A2VDP1	ENSBTAG00000009516	RNF20	novel.circ.003020	209-260	-	79.57	4.18	1	PF13920,PF00097	2	-	0	0.666667
Q3ZC55	ENSBTAG00000009696	ACTN2	novel.circ.003020	209-260	-	79.56	4.18	1	PF00435,PF00307,PF08726,PF11971	8	-	0	0.666667
Q3ZC55	ENSBTAG00000009696	ACTN2	novel.circ.000696	176-227	-	78.92	4.14	1	PF00435,PF00307,PF08726,PF11971	8	-	0	0.666667
Q3ZC55	ENSBTAG00000009696	ACTN2	novel.circ.001267	176-227	-	78.78	4.13	1	PF00435,PF00307,PF08726,PF11971	8	-	0	0.666667
A2VDP1	ENSBTAG00000009516	RNF20	novel.circ.002459	270-321	-	78.65	4.12	1	PF13920,PF00097	2	-	0	0.666667
A2VDL6	ENSBTAG00000010551	ATP1A2	novel.circ.000980	407-37	back-splicing_junction	78.52	4.12	1	PF00122,PF00689,PF13246,PF00702,PF00690	5	-	0	0.666667
Q10568	ENSBTAG00000010227	CPSF2	novel.circ.000011	51-102	-	78.51	4.66	1	PF16661,PF13299,PF10996,PF07521,PF00753	5	-	0	0.666667
A2VDL6	ENSBTAG00000010551	ATP1A2	novel.circ.002459	270-321	-	78.23	4.1	1	PF00122,PF00689,PF13246,PF00702,PF00690	5	-	0	0.666667
Q10568	ENSBTAG00000010227	CPSF2	novel.circ.002538	287-12	back-splicing_junction	78.14	4.64	1	PF16661,PF13299,PF10996,PF07521,PF00753	5	-	0	0.666667
A2VDP1	ENSBTAG00000009516	RNF20	novel.circ.001267	176-227	-	78.08	4.09	1	PF13920,PF00097	2	-	0	0.666667
A2VDL6	ENSBTAG00000010551	ATP1A2	novel.circ.003262	276-327	-	77.96	4.08	1	PF00122,PF00689,PF13246,PF00702,PF00690	5	-	0	0.666667
Q3ZC55	ENSBTAG00000009696	ACTN2	novel.circ.002459	270-321	-	77.9	4.08	1	PF00435,PF00307,PF08726,PF11971	8	-	0	0.666667
Q3ZC55	ENSBTAG00000009696	ACTN2	novel.circ.000980	407-37	back-splicing_junction	77.62	4.06	1	PF00435,PF00307,PF08726,PF11971	8	-	0	0.666667
A2VDP1	ENSBTAG00000009516	RNF20	novel.circ.003262	276-327	-	77.26	4.04	1	PF13920,PF00097	2	-	0	0.666667
A2VDP1	ENSBTAG00000009516	RNF20	novel.circ.000980	407-37	back-splicing_junction	77.07	4.03	1	PF13920,PF00097	2	-	0	0.666667
Q0IIK5	ENSBTAG00000009906	DDX1	novel.circ.002511	26-77	-	76.96	4.02	1	PF00270,PF00271,PF00622	3	-	0	0.666667
Q3ZC55	ENSBTAG00000009696	ACTN2	novel.circ.003262	276-327	-	76.88	4.01	1	PF00435,PF00307,PF08726,PF11971	8	-	0	0.666667
Q0IIK5	ENSBTAG00000009906	DDX1	novel.circ.002840	222-273	-	75.61	4.47	1	PF00270,PF00271,PF00622	3	-	0	0.666667
A2VDP1	ENSBTAG00000009516	RNF20	novel.circ.002631	211-262	-	75.29	4.45	1	PF13920,PF00097	2	-	0	0.666667
Q0IIK5	ENSBTAG00000009906	DDX1	novel.circ.001771	156-207	-	74.56	4.4	1	PF00270,PF00271,PF00622	3	-	0	0.666667
A2VDL6	ENSBTAG00000010551	ATP1A2	novel.circ.001068	76-127	-	74.48	4.39	1	PF00122,PF00689,PF13246,PF00702,PF00690	5	-	0	0.666667
A2VDP1	ENSBTAG00000009516	RNF20	novel.circ.001068	76-127	-	74.4	4.38	1	PF13920,PF00097	2	-	0	0.666667
A7MBJ5	ENSBTAG00000009939	CAND1	novel.circ.001469	1-52	-	74.26	4.38	1	PF08623	1	-	0	0.666667
Q3ZC55	ENSBTAG00000009696	ACTN2	novel.circ.001068	76-127	-	74.03	4.36	1	PF00435,PF00307,PF08726,PF11971	8	-	0	0.666667
A2VDL6	ENSBTAG00000010551	ATP1A2	novel.circ.002631	211-262	-	73.94	4.35	1	PF00122,PF00689,PF13246,PF00702,PF00690	5	-	0	0.666667
Q3ZC55	ENSBTAG00000009696	ACTN2	novel.circ.002631	211-262	-	73.76	4.34	1	PF00435,PF00307,PF08726,PF11971	8	-	0	0.666667
Q58CX2	ENSBTAG00000009400	FASTKD3	novel.circ.000011	51-102	-	71.89	4.21	1	PF08368,PF06743,PF08373	3	-	0	0.666667
A2VDL6	ENSBTAG00000010551	ATP1A2	novel.circ.000157	136-12	back-splicing_junction	71.44	4.36	1	PF00122,PF00689,PF13246,PF00702,PF00690	5	-	0	0.666667
A7MBJ5	ENSBTAG00000009939	CAND1	novel.circ.002217	151-202	-	71.19	4.17	1	PF08623	1	-	0	0.666667
Q58CX2	ENSBTAG00000009400	FASTKD3	novel.circ.002538	287-12	back-splicing_junction	70.95	4.15	1	PF08368,PF06743,PF08373	3	-	0	0.666667
A2VDP1	ENSBTAG00000009516	RNF20	novel.circ.000157	136-12	back-splicing_junction	70.77	4.31	1	PF13920,PF00097	2	-	0	0.666667
Q3ZC55	ENSBTAG00000009696	ACTN2	novel.circ.000157	136-12	back-splicing_junction	70.5	4.29	1	PF00435,PF00307,PF08726,PF11971	8	-	0	0.666667
A2VDL6	ENSBTAG00000010551	ATP1A2	novel.circ.001482	268-37	back-splicing_junction	70.37	4.11	1	PF00122,PF00689,PF13246,PF00702,PF00690	5	-	0	0.666667
Q10568	ENSBTAG00000010227	CPSF2	novel.circ.002840	222-273	-	69.72	4.07	1	PF16661,PF13299,PF10996,PF07521,PF00753	5	-	0	0.666667
Q3ZC55	ENSBTAG00000009696	ACTN2	novel.circ.001482	268-37	back-splicing_junction	69.67	4.06	1	PF00435,PF00307,PF08726,PF11971	8	-	0	0.666667
A2VDP1	ENSBTAG00000009516	RNF20	novel.circ.001482	268-37	back-splicing_junction	69.61	4.06	1	PF13920,PF00097	2	-	0	0.666667
Q10568	ENSBTAG00000010227	CPSF2	novel.circ.001771	156-207	-	68.9	4.01	1	PF16661,PF13299,PF10996,PF07521,PF00753	5	-	0	0.666667
Q0IIK5	ENSBTAG00000009906	DDX1	novel.circ.001469	1-52	-	68.87	4.01	1	PF00270,PF00271,PF00622	3	-	0	0.666667
Q17QZ7	ENSBTAG00000033010	TTC27	novel.circ.003863	315-366	-	118.34	5.68	1	-	0	-	0	0.666667
Q17QZ7	ENSBTAG00000033010	TTC27	novel.circ.000847	609-662	-	108.52	5.13	1	-	0	-	0	0.666667
Q17QZ7	ENSBTAG00000033010	TTC27	novel.circ.000011	51-102	-	103.67	6.38	1	-	0	-	0	0.666667
Q17QZ7	ENSBTAG00000033010	TTC27	novel.circ.002538	287-12	back-splicing_junction	102.64	6.31	1	-	0	-	0	0.666667
Q17QZ7	ENSBTAG00000033010	TTC27	novel.circ.001549	1250-1307	-	101.84	4.56	1	-	0	-	0	0.666667
Q17QZ7	ENSBTAG00000033010	TTC27	novel.circ.000493	1109-1160	-	99.93	4.65	1	-	0	-	0	0.666667
Q3ZBK7	ENSBTAG00000030566	GLE1	novel.circ.003863	315-366	-	99.65	4.64	1	PF07817	1	-	0	0.666667
Q17QZ7	ENSBTAG00000033010	TTC27	novel.circ.003627	726-777	-	99.05	4.73	1	-	0	-	0	0.666667
Q17QZ7	ENSBTAG00000033010	TTC27	novel.circ.004067	971-37	back-splicing_junction	98.22	4.68	1	-	0	-	0	0.666667
Q17QZ7	ENSBTAG00000033010	TTC27	novel.circ.002511	26-77	-	93.52	5.05	1	-	0	-	0	0.666667
Q17QZ7	ENSBTAG00000033010	TTC27	novel.circ.002840	222-273	-	92.04	5.59	1	-	0	-	0	0.666667
Q3ZBK7	ENSBTAG00000030566	GLE1	novel.circ.000847	609-662	-	91.75	4.19	1	PF07817	1	-	0	0.666667
Q17QZ7	ENSBTAG00000033010	TTC27	novel.circ.001771	156-207	-	91.44	5.55	1	-	0	-	0	0.666667
Q17QZ7	ENSBTAG00000033010	TTC27	novel.circ.001459	326-377	-	89.62	4.63	1	-	0	-	0	0.666667
Q17QZ7	ENSBTAG00000033010	TTC27	novel.circ.003355	308-359	-	88.9	4.03	1	-	0	-	0	0.666667
Q3ZBK7	ENSBTAG00000030566	GLE1	novel.circ.000011	51-102	-	87.42	5.27	1	PF07817	1	-	0	0.666667
Q17QZ7	ENSBTAG00000033010	TTC27	novel.circ.001323	551-602	-	86.73	4.23	1	-	0	-	0	0.666667
Q3ZBK7	ENSBTAG00000030566	GLE1	novel.circ.002538	287-12	back-splicing_junction	86.23	5.19	1	PF07817	1	-	0	0.666667
Q17QZ7	ENSBTAG00000033010	TTC27	novel.circ.002187	220-271	-	84.51	4.49	1	-	0	-	0	0.666667
Q17QZ7	ENSBTAG00000033010	TTC27	novel.circ.001469	1-52	-	83.92	5.03	1	-	0	-	0	0.666667
Q17QZ7	ENSBTAG00000033010	TTC27	novel.circ.002764	178-229	-	80.63	4.08	1	-	0	-	0	0.666667
Q17QZ7	ENSBTAG00000033010	TTC27	novel.circ.002217	151-202	-	80.44	4.8	1	-	0	-	0	0.666667
Q17QZ7	ENSBTAG00000033010	TTC27	novel.circ.001853	133-184	-	79.4	4.17	1	-	0	-	0	0.666667
Q3ZBK7	ENSBTAG00000030566	GLE1	novel.circ.002511	26-77	-	79.36	4.17	1	PF07817	1	-	0	0.666667
Q3ZBK7	ENSBTAG00000030566	GLE1	novel.circ.002840	222-273	-	77.71	4.61	1	PF07817	1	-	0	0.666667
Q17QZ7	ENSBTAG00000033010	TTC27	novel.circ.003020	209-260	-	77.19	4.03	1	-	0	-	0	0.666667
Q3ZBK7	ENSBTAG00000030566	GLE1	novel.circ.001771	156-207	-	76.39	4.52	1	PF07817	1	-	0	0.666667
Q28056	ENSBTAG00000026283	ASPH	novel.circ.002538	287-12	back-splicing_junction	74.46	4.39	1	PF05279,PF05118,PF13432	3	-	0	0.666667
Q28056	ENSBTAG00000026283	ASPH	novel.circ.000011	51-102	-	74.24	4.37	1	PF05279,PF05118,PF13432	3	-	0	0.666667
Q1RMG8	ENSBTAG00000008642	POLR1D	novel.circ.001086	158-209	-	71.09	4.16	1	PF13656,PF01193	2	-	0	0.666667
Q76I82	ENSBTAG00000020733	RPS15A	novel.circ.001086	158-209	-	70.96	4.15	1	PF00410	1	-	0	0.666667
Q17QZ7	ENSBTAG00000033010	TTC27	novel.circ.001068	76-127	-	70.81	4.14	1	-	0	-	0	0.666667
Q3ZBK7	ENSBTAG00000030566	GLE1	novel.circ.001469	1-52	-	70.61	4.13	1	PF07817	1	-	0	0.666667
Q17QZ7	ENSBTAG00000033010	TTC27	novel.circ.002631	211-262	-	69.42	4.05	1	-	0	-	0	0.666667
Q17QZ7	ENSBTAG00000033010	TTC27	novel.circ.000157	136-12	back-splicing_junction	68.27	4.14	1	-	0	-	0	0.666667
Q17R09	ENSBTAG00000013265	DHX38	novel.circ.003863	315-366	-	113.39	5.41	1	PF04408,PF07717,PF00271,PF00270	4	-	0	0.666667
Q3T0Q8	ENSBTAG00000013671	UTP14A	novel.circ.003863	315-366	-	106.86	5.04	1	PF04615	1	-	0	0.666667
Q17R09	ENSBTAG00000013265	DHX38	novel.circ.000847	609-662	-	104.16	4.89	1	PF04408,PF07717,PF00271,PF00270	4	-	0	0.666667
Q17R09	ENSBTAG00000013265	DHX38	novel.circ.000011	51-102	-	99.27	6.08	1	PF04408,PF07717,PF00271,PF00270	4	-	0	0.666667
Q17R09	ENSBTAG00000013265	DHX38	novel.circ.002538	287-12	back-splicing_junction	98.61	6.03	1	PF04408,PF07717,PF00271,PF00270	4	-	0	0.666667
Q3T0Q8	ENSBTAG00000013671	UTP14A	novel.circ.000847	609-662	-	97.89	4.54	1	PF04615	1	-	0	0.666667
A5PK42	ENSBTAG00000013698	ODAD4	novel.circ.003863	315-366	-	97.22	4.5	1	PF17874	1	-	0	0.666667
Q17R09	ENSBTAG00000013265	DHX38	novel.circ.001549	1250-1307	-	97.21	4.3	1	PF04408,PF07717,PF00271,PF00270	4	-	0	0.666667
Q17R09	ENSBTAG00000013265	DHX38	novel.circ.000493	1109-1160	-	95.88	4.42	1	PF04408,PF07717,PF00271,PF00270	4	-	0	0.666667
Q17R09	ENSBTAG00000013265	DHX38	novel.circ.004067	971-37	back-splicing_junction	94.86	4.49	1	PF04408,PF07717,PF00271,PF00270	4	-	0	0.666667
Q17R09	ENSBTAG00000013265	DHX38	novel.circ.003627	726-777	-	94.76	4.49	1	PF04408,PF07717,PF00271,PF00270	4	-	0	0.666667
Q3T0Q8	ENSBTAG00000013671	UTP14A	novel.circ.000011	51-102	-	93.42	5.68	1	PF04615	1	-	0	0.666667
A1A4K5	ENSBTAG00000013165	ENPP2	novel.circ.003863	315-366	-	93.38	4.28	1	PF01663,PF01033,PF01223	4	-	0	0.666667
Q3T0Q8	ENSBTAG00000013671	UTP14A	novel.circ.001549	1250-1307	-	93.04	4.08	1	PF04615	1	-	0	0.666667
Q3T0Q8	ENSBTAG00000013671	UTP14A	novel.circ.002538	287-12	back-splicing_junction	92.6	5.62	1	PF04615	1	-	0	0.666667
Q17R09	ENSBTAG00000013265	DHX38	novel.circ.002511	26-77	-	89.87	4.82	1	PF04408,PF07717,PF00271,PF00270	4	-	0	0.666667
A5PK42	ENSBTAG00000013698	ODAD4	novel.circ.000847	609-662	-	89.62	4.07	1	PF17874	1	-	0	0.666667
Q3T0Q8	ENSBTAG00000013671	UTP14A	novel.circ.003627	726-777	-	89.53	4.19	1	PF04615	1	-	0	0.666667
Q3T0Q8	ENSBTAG00000013671	UTP14A	novel.circ.000493	1109-1160	-	89.32	4.06	1	PF04615	1	-	0	0.666667
Q17R09	ENSBTAG00000013265	DHX38	novel.circ.002840	222-273	-	88.17	5.32	1	PF04408,PF07717,PF00271,PF00270	4	-	0	0.666667
Q3T0Q8	ENSBTAG00000013671	UTP14A	novel.circ.004067	971-37	back-splicing_junction	87.79	4.09	1	PF04615	1	-	0	0.666667
Q17R09	ENSBTAG00000013265	DHX38	novel.circ.001771	156-207	-	87.19	5.26	1	PF04408,PF07717,PF00271,PF00270	4	-	0	0.666667
A5PK42	ENSBTAG00000013698	ODAD4	novel.circ.000011	51-102	-	85.84	5.16	1	PF17874	1	-	0	0.666667
Q17R09	ENSBTAG00000013265	DHX38	novel.circ.001459	326-377	-	85.52	4.38	1	PF04408,PF07717,PF00271,PF00270	4	-	0	0.666667
A5PK42	ENSBTAG00000013698	ODAD4	novel.circ.002538	287-12	back-splicing_junction	84.42	5.07	1	PF17874	1	-	0	0.666667
Q3T0Q8	ENSBTAG00000013671	UTP14A	novel.circ.002511	26-77	-	83.74	4.44	1	PF04615	1	-	0	0.666667
Q17R09	ENSBTAG00000013265	DHX38	novel.circ.001323	551-602	-	83.08	4.01	1	PF04408,PF07717,PF00271,PF00270	4	-	0	0.666667
Q3T0Q8	ENSBTAG00000013671	UTP14A	novel.circ.002840	222-273	-	82.17	4.91	1	PF04615	1	-	0	0.666667
Q3T0Q8	ENSBTAG00000013671	UTP14A	novel.circ.001771	156-207	-	82.05	4.91	1	PF04615	1	-	0	0.666667
A1A4K5	ENSBTAG00000013165	ENPP2	novel.circ.000011	51-102	-	81.67	4.88	1	PF01663,PF01033,PF01223	4	-	0	0.666667
Q17R09	ENSBTAG00000013265	DHX38	novel.circ.002187	220-271	-	81.29	4.29	1	PF04408,PF07717,PF00271,PF00270	4	-	0	0.666667
A1A4K5	ENSBTAG00000013165	ENPP2	novel.circ.002538	287-12	back-splicing_junction	80.99	4.83	1	PF01663,PF01033,PF01223	4	-	0	0.666667
Q3T0Q8	ENSBTAG00000013671	UTP14A	novel.circ.001459	326-377	-	80.94	4.1	1	PF04615	1	-	0	0.666667
Q17R09	ENSBTAG00000013265	DHX38	novel.circ.001469	1-52	-	80.39	4.79	1	PF04408,PF07717,PF00271,PF00270	4	-	0	0.666667
A5PK42	ENSBTAG00000013698	ODAD4	novel.circ.002511	26-77	-	78.51	4.11	1	PF17874	1	-	0	0.666667
Q17R09	ENSBTAG00000013265	DHX38	novel.circ.002217	151-202	-	77.17	4.57	1	PF04408,PF07717,PF00271,PF00270	4	-	0	0.666667
A5PK42	ENSBTAG00000013698	ODAD4	novel.circ.002840	222-273	-	76.87	4.55	1	PF17874	1	-	0	0.666667
Q3T0Q8	ENSBTAG00000013671	UTP14A	novel.circ.001469	1-52	-	75.58	4.46	1	PF04615	1	-	0	0.666667
A5PK42	ENSBTAG00000013698	ODAD4	novel.circ.001771	156-207	-	74.96	4.42	1	PF17874	1	-	0	0.666667
A1A4K5	ENSBTAG00000013165	ENPP2	novel.circ.002840	222-273	-	72.26	4.24	1	PF01663,PF01033,PF01223	4	-	0	0.666667
Q3T0Q8	ENSBTAG00000013671	UTP14A	novel.circ.002217	151-202	-	72.12	4.23	1	PF04615	1	-	0	0.666667
A1A4K5	ENSBTAG00000013165	ENPP2	novel.circ.001771	156-207	-	71.48	4.19	1	PF01663,PF01033,PF01223	4	-	0	0.666667
A4IF62	ENSBTAG00000013259	POLR3A	novel.circ.000011	51-102	-	70.96	4.15	1	PF04997,PF04998,PF00623,PF04983,PF05000	5	-	0	0.666667
A4IF62	ENSBTAG00000013259	POLR3A	novel.circ.002538	287-12	back-splicing_junction	70.5	4.12	1	PF04997,PF04998,PF00623,PF04983,PF05000	5	-	0	0.666667
Q3ZBG7	ENSBTAG00000012803	SRP19	novel.circ.003355	1-52	-	17.07	0	1	PF01922	1	P09132|SRP19|547|20179341|PDB	1	0.666667
Q0V8H6	ENSBTAG00000014297	MOV10	novel.circ.003863	315-366	-	125.98	6.11	1	PF13087,PF13086,PF13604,PF13245,PF04851	6	-	0	0.666667
Q3ZBV8	ENSBTAG00000014261	TARS1	novel.circ.003863	315-366	-	115.99	5.55	1	PF00587,PF03129,PF02824,PF07973	4	-	0	0.666667
Q0V8H6	ENSBTAG00000014297	MOV10	novel.circ.000847	609-662	-	115.71	5.54	1	PF13087,PF13086,PF13604,PF13245,PF04851	6	-	0	0.666667
Q0V8H6	ENSBTAG00000014297	MOV10	novel.circ.000011	51-102	-	110.87	6.87	1	PF13087,PF13086,PF13604,PF13245,PF04851	6	-	0	0.666667
Q0V8H6	ENSBTAG00000014297	MOV10	novel.circ.002538	287-12	back-splicing_junction	109.34	6.76	1	PF13087,PF13086,PF13604,PF13245,PF04851	6	-	0	0.666667
Q0V8H6	ENSBTAG00000014297	MOV10	novel.circ.001549	1250-1307	-	109.1	4.95	1	PF13087,PF13086,PF13604,PF13245,PF04851	6	-	0	0.666667
Q0V8H6	ENSBTAG00000014297	MOV10	novel.circ.000493	1109-1160	-	106.4	5.01	1	PF13087,PF13086,PF13604,PF13245,PF04851	6	-	0	0.666667
Q3ZBV8	ENSBTAG00000014261	TARS1	novel.circ.000847	609-662	-	105.9	4.99	1	PF00587,PF03129,PF02824,PF07973	4	-	0	0.666667
Q0V8H6	ENSBTAG00000014297	MOV10	novel.circ.003627	726-777	-	105.89	5.12	1	PF13087,PF13086,PF13604,PF13245,PF04851	6	-	0	0.666667
Q0V8H6	ENSBTAG00000014297	MOV10	novel.circ.004067	971-37	back-splicing_junction	104.1	5.02	1	PF13087,PF13086,PF13604,PF13245,PF04851	6	-	0	0.666667
Q3ZBV8	ENSBTAG00000014261	TARS1	novel.circ.000011	51-102	-	101.47	6.23	1	PF00587,PF03129,PF02824,PF07973	4	-	0	0.666667
Q3ZBV8	ENSBTAG00000014261	TARS1	novel.circ.001549	1250-1307	-	101.01	4.51	1	PF00587,PF03129,PF02824,PF07973	4	-	0	0.666667
Q3ZBV8	ENSBTAG00000014261	TARS1	novel.circ.002538	287-12	back-splicing_junction	99.95	6.13	1	PF00587,PF03129,PF02824,PF07973	4	-	0	0.666667
Q0V8H6	ENSBTAG00000014297	MOV10	novel.circ.002511	26-77	-	99.91	5.45	1	PF13087,PF13086,PF13604,PF13245,PF04851	6	-	0	0.666667
Q0V8H6	ENSBTAG00000014297	MOV10	novel.circ.002840	222-273	-	98.48	6.03	1	PF13087,PF13086,PF13604,PF13245,PF04851	6	-	0	0.666667
Q0V8H6	ENSBTAG00000014297	MOV10	novel.circ.001771	156-207	-	97.43	5.95	1	PF13087,PF13086,PF13604,PF13245,PF04851	6	-	0	0.666667
Q3ZBV8	ENSBTAG00000014261	TARS1	novel.circ.003627	726-777	-	97.36	4.63	1	PF00587,PF03129,PF02824,PF07973	4	-	0	0.666667
Q3ZBV8	ENSBTAG00000014261	TARS1	novel.circ.000493	1109-1160	-	96.97	4.49	1	PF00587,PF03129,PF02824,PF07973	4	-	0	0.666667
Q0V8H6	ENSBTAG00000014297	MOV10	novel.circ.001459	326-377	-	95.93	5.01	1	PF13087,PF13086,PF13604,PF13245,PF04851	6	-	0	0.666667
Q0V8H6	ENSBTAG00000014297	MOV10	novel.circ.003355	308-359	-	94.77	4.36	1	PF13087,PF13086,PF13604,PF13245,PF04851	6	-	0	0.666667
Q0V8H6	ENSBTAG00000014297	MOV10	novel.circ.001945	151-202	-	94.76	4.34	1	PF13087,PF13086,PF13604,PF13245,PF04851	6	-	0	0.666667
Q3ZBV8	ENSBTAG00000014261	TARS1	novel.circ.004067	971-37	back-splicing_junction	94.67	4.48	1	PF00587,PF03129,PF02824,PF07973	4	-	0	0.666667
Q0V8H6	ENSBTAG00000014297	MOV10	novel.circ.000597	1043-1094	-	93.77	4.31	1	PF13087,PF13086,PF13604,PF13245,PF04851	6	-	0	0.666667
Q0V8H6	ENSBTAG00000014297	MOV10	novel.circ.001323	551-602	-	92.91	4.59	1	PF13087,PF13086,PF13604,PF13245,PF04851	6	-	0	0.666667
Q0V8H6	ENSBTAG00000014297	MOV10	novel.circ.002876	232-307	-	92.37	4.06	1	PF13087,PF13086,PF13604,PF13245,PF04851	6	-	0	0.666667
Q3ZBV8	ENSBTAG00000014261	TARS1	novel.circ.002511	26-77	-	91.41	4.92	1	PF00587,PF03129,PF02824,PF07973	4	-	0	0.666667
Q0V8H6	ENSBTAG00000014297	MOV10	novel.circ.002187	220-271	-	90.13	4.84	1	PF13087,PF13086,PF13604,PF13245,PF04851	6	-	0	0.666667
Q0V8H6	ENSBTAG00000014297	MOV10	novel.circ.001469	1-52	-	89.61	5.42	1	PF13087,PF13086,PF13604,PF13245,PF04851	6	-	0	0.666667
Q3ZBV8	ENSBTAG00000014261	TARS1	novel.circ.002840	222-273	-	89.44	5.41	1	PF00587,PF03129,PF02824,PF07973	4	-	0	0.666667
Q3ZBV8	ENSBTAG00000014261	TARS1	novel.circ.001771	156-207	-	89.16	5.39	1	PF00587,PF03129,PF02824,PF07973	4	-	0	0.666667
Q0V8H6	ENSBTAG00000014297	MOV10	novel.circ.003199	1001-1052	-	88.27	4.12	1	PF13087,PF13086,PF13604,PF13245,PF04851	6	-	0	0.666667
Q0V8H6	ENSBTAG00000014297	MOV10	novel.circ.000408	830-12	back-splicing_junction	87.68	4.21	1	PF13087,PF13086,PF13604,PF13245,PF04851	6	-	0	0.666667
Q3ZBV8	ENSBTAG00000014261	TARS1	novel.circ.001459	326-377	-	87.58	4.51	1	PF00587,PF03129,PF02824,PF07973	4	-	0	0.666667
Q0V8H6	ENSBTAG00000014297	MOV10	novel.circ.001243	26-77	-	87.26	4.26	1	PF13087,PF13086,PF13604,PF13245,PF04851	6	-	0	0.666667
Q3ZBV8	ENSBTAG00000014261	TARS1	novel.circ.001323	551-602	-	87	4.24	1	PF00587,PF03129,PF02824,PF07973	4	-	0	0.666667
Q0V8H6	ENSBTAG00000014297	MOV10	novel.circ.002764	178-229	-	85.39	4.37	1	PF13087,PF13086,PF13604,PF13245,PF04851	6	-	0	0.666667
Q0V8H6	ENSBTAG00000014297	MOV10	novel.circ.002217	151-202	-	85.35	5.13	1	PF13087,PF13086,PF13604,PF13245,PF04851	6	-	0	0.666667
Q0V8H6	ENSBTAG00000014297	MOV10	novel.circ.001853	133-184	-	84.33	4.48	1	PF13087,PF13086,PF13604,PF13245,PF04851	6	-	0	0.666667
Q3ZBV8	ENSBTAG00000014261	TARS1	novel.circ.001469	1-52	-	82.36	4.93	1	PF00587,PF03129,PF02824,PF07973	4	-	0	0.666667
Q3ZBV8	ENSBTAG00000014261	TARS1	novel.circ.002187	220-271	-	82.17	4.34	1	PF00587,PF03129,PF02824,PF07973	4	-	0	0.666667
Q0V8H6	ENSBTAG00000014297	MOV10	novel.circ.003020	209-260	-	82.15	4.34	1	PF13087,PF13086,PF13604,PF13245,PF04851	6	-	0	0.666667
Q0V8H6	ENSBTAG00000014297	MOV10	novel.circ.000246	101-152	-	81.61	4.31	1	PF13087,PF13086,PF13604,PF13245,PF04851	6	-	0	0.666667
Q0V8H6	ENSBTAG00000014297	MOV10	novel.circ.000224	522-12	back-splicing_junction	81.58	4.14	1	PF13087,PF13086,PF13604,PF13245,PF04851	6	-	0	0.666667
Q0V8H6	ENSBTAG00000014297	MOV10	novel.circ.001267	176-227	-	81.02	4.27	1	PF13087,PF13086,PF13604,PF13245,PF04851	6	-	0	0.666667
Q0V8H6	ENSBTAG00000014297	MOV10	novel.circ.000696	176-227	-	80.78	4.26	1	PF13087,PF13086,PF13604,PF13245,PF04851	6	-	0	0.666667
Q0V8H6	ENSBTAG00000014297	MOV10	novel.circ.000980	407-37	back-splicing_junction	79.86	4.2	1	PF13087,PF13086,PF13604,PF13245,PF04851	6	-	0	0.666667
Q0V8H6	ENSBTAG00000014297	MOV10	novel.circ.001049	101-152	-	79.86	4.04	1	PF13087,PF13086,PF13604,PF13245,PF04851	6	-	0	0.666667
Q0V8H6	ENSBTAG00000014297	MOV10	novel.circ.002459	270-321	-	79.47	4.17	1	PF13087,PF13086,PF13604,PF13245,PF04851	6	-	0	0.666667
Q0V8H6	ENSBTAG00000014297	MOV10	novel.circ.003707	1-52	-	79.33	4	1	PF13087,PF13086,PF13604,PF13245,PF04851	6	-	0	0.666667
Q0V8H6	ENSBTAG00000014297	MOV10	novel.circ.003262	276-327	-	79.21	4.16	1	PF13087,PF13086,PF13604,PF13245,PF04851	6	-	0	0.666667
Q3ZBV8	ENSBTAG00000014261	TARS1	novel.circ.002217	151-202	-	78.07	4.63	1	PF00587,PF03129,PF02824,PF07973	4	-	0	0.666667
Q3ZBV8	ENSBTAG00000014261	TARS1	novel.circ.001853	133-184	-	77.11	4.03	1	PF00587,PF03129,PF02824,PF07973	4	-	0	0.666667
Q0V8H6	ENSBTAG00000014297	MOV10	novel.circ.001068	76-127	-	75.86	4.48	1	PF13087,PF13086,PF13604,PF13245,PF04851	6	-	0	0.666667
Q0V8H6	ENSBTAG00000014297	MOV10	novel.circ.002631	211-262	-	74.62	4.4	1	PF13087,PF13086,PF13604,PF13245,PF04851	6	-	0	0.666667
Q0V8H6	ENSBTAG00000014297	MOV10	novel.circ.000157	136-12	back-splicing_junction	72.44	4.42	1	PF13087,PF13086,PF13604,PF13245,PF04851	6	-	0	0.666667
Q0V8H6	ENSBTAG00000014297	MOV10	novel.circ.001482	268-37	back-splicing_junction	72.17	4.23	1	PF13087,PF13086,PF13604,PF13245,PF04851	6	-	0	0.666667
Q0V8H6	ENSBTAG00000014297	MOV10	novel.circ.003014	51-102	-	69.95	4.08	1	PF13087,PF13086,PF13604,PF13245,PF04851	6	-	0	0.666667
Q3ZBV8	ENSBTAG00000014261	TARS1	novel.circ.002631	211-262	-	69.93	4.08	1	PF00587,PF03129,PF02824,PF07973	4	-	0	0.666667
Q3ZBV8	ENSBTAG00000014261	TARS1	novel.circ.001068	76-127	-	69.62	4.06	1	PF00587,PF03129,PF02824,PF07973	4	-	0	0.666667
A2VE21	ENSBTAG00000017245	COPG2	novel.circ.003863	315-366	-	117.59	5.64	1	PF01602,PF08752,PF16381,PF13646	4	-	0	0.666667
P41541	ENSBTAG00000017028	USO1	novel.circ.003863	315-366	-	115.87	5.55	1	PF04869,PF18770,PF04871	3	-	0	0.666667
A2VE39	ENSBTAG00000017091	CMTR1	novel.circ.003863	315-366	-	111.49	5.3	1	PF01728,PF01585	2	-	0	0.666667
A2VE21	ENSBTAG00000017245	COPG2	novel.circ.000847	609-662	-	107.67	5.09	1	PF01602,PF08752,PF16381,PF13646	4	-	0	0.666667
P41541	ENSBTAG00000017028	USO1	novel.circ.000847	609-662	-	105.89	4.99	1	PF04869,PF18770,PF04871	3	-	0	0.666667
A2VE21	ENSBTAG00000017245	COPG2	novel.circ.000011	51-102	-	102.76	6.32	1	PF01602,PF08752,PF16381,PF13646	4	-	0	0.666667
A2VE39	ENSBTAG00000017091	CMTR1	novel.circ.000847	609-662	-	102.69	4.81	1	PF01728,PF01585	2	-	0	0.666667
P41541	ENSBTAG00000017028	USO1	novel.circ.001549	1250-1307	-	101.68	4.55	1	PF04869,PF18770,PF04871	3	-	0	0.666667
A2VE21	ENSBTAG00000017245	COPG2	novel.circ.002538	287-12	back-splicing_junction	101.54	6.23	1	PF01602,PF08752,PF16381,PF13646	4	-	0	0.666667
A2VE21	ENSBTAG00000017245	COPG2	novel.circ.001549	1250-1307	-	101.41	4.53	1	PF01602,PF08752,PF16381,PF13646	4	-	0	0.666667
P41541	ENSBTAG00000017028	USO1	novel.circ.000011	51-102	-	101.1	6.2	1	PF04869,PF18770,PF04871	3	-	0	0.666667
P41541	ENSBTAG00000017028	USO1	novel.circ.002538	287-12	back-splicing_junction	100.33	6.15	1	PF04869,PF18770,PF04871	3	-	0	0.666667
A2VE21	ENSBTAG00000017245	COPG2	novel.circ.000493	1109-1160	-	98.52	4.57	1	PF01602,PF08752,PF16381,PF13646	4	-	0	0.666667
A2VE39	ENSBTAG00000017091	CMTR1	novel.circ.000011	51-102	-	98.31	6.01	1	PF01728,PF01585	2	-	0	0.666667
A2VE21	ENSBTAG00000017245	COPG2	novel.circ.003627	726-777	-	98.17	4.68	1	PF01602,PF08752,PF16381,PF13646	4	-	0	0.666667
P41541	ENSBTAG00000017028	USO1	novel.circ.003627	726-777	-	97.12	4.62	1	PF04869,PF18770,PF04871	3	-	0	0.666667
A2VE21	ENSBTAG00000017245	COPG2	novel.circ.004067	971-37	back-splicing_junction	96.99	4.61	1	PF01602,PF08752,PF16381,PF13646	4	-	0	0.666667
A2VE39	ENSBTAG00000017091	CMTR1	novel.circ.002538	287-12	back-splicing_junction	96.61	5.9	1	PF01728,PF01585	2	-	0	0.666667
P41541	ENSBTAG00000017028	USO1	novel.circ.000493	1109-1160	-	95.79	4.42	1	PF04869,PF18770,PF04871	3	-	0	0.666667
A2VE39	ENSBTAG00000017091	CMTR1	novel.circ.000493	1109-1160	-	95.66	4.41	1	PF01728,PF01585	2	-	0	0.666667
A2VE39	ENSBTAG00000017091	CMTR1	novel.circ.004067	971-37	back-splicing_junction	94.48	4.47	1	PF01728,PF01585	2	-	0	0.666667
A6QNM2	ENSBTAG00000015519	GFM2	novel.circ.003863	315-366	-	94.29	4.34	1	PF00009,PF14492,PF00679,PF03764,PF03144	5	-	0	0.666667
Q08E13	ENSBTAG00000015767	RNF10	novel.circ.003863	315-366	-	93.9	4.31	1	PF13639,PF00097,PF13445	3	-	0	0.666667
A2VE39	ENSBTAG00000017091	CMTR1	novel.circ.001549	1261-1318	-	93.89	4.12	1	PF01728,PF01585	2	-	0	0.666667
P41541	ENSBTAG00000017028	USO1	novel.circ.004067	971-37	back-splicing_junction	93.84	4.43	1	PF04869,PF18770,PF04871	3	-	0	0.666667
A2VE39	ENSBTAG00000017091	CMTR1	novel.circ.003627	726-777	-	93.09	4.39	1	PF01728,PF01585	2	-	0	0.666667
A2VE21	ENSBTAG00000017245	COPG2	novel.circ.002511	26-77	-	92.71	5	1	PF01602,PF08752,PF16381,PF13646	4	-	0	0.666667
Q865B7	ENSBTAG00000017024	PPARGC1A	novel.circ.003863	315-366	-	92.35	4.23	1	PF00076	1	-	0	0.666667
A2VE21	ENSBTAG00000017245	COPG2	novel.circ.002840	222-273	-	91.06	5.52	1	PF01602,PF08752,PF16381,PF13646	4	-	0	0.666667
P41541	ENSBTAG00000017028	USO1	novel.circ.002511	26-77	-	90.76	4.88	1	PF04869,PF18770,PF04871	3	-	0	0.666667
A2VE21	ENSBTAG00000017245	COPG2	novel.circ.001771	156-207	-	90.18	5.46	1	PF01602,PF08752,PF16381,PF13646	4	-	0	0.666667
P41541	ENSBTAG00000017028	USO1	novel.circ.002840	222-273	-	89.27	5.4	1	PF04869,PF18770,PF04871	3	-	0	0.666667
A2VE39	ENSBTAG00000017091	CMTR1	novel.circ.002511	26-77	-	89.02	4.77	1	PF01728,PF01585	2	-	0	0.666667
P41541	ENSBTAG00000017028	USO1	novel.circ.001771	156-207	-	88.97	5.38	1	PF04869,PF18770,PF04871	3	-	0	0.666667
A2VE21	ENSBTAG00000017245	COPG2	novel.circ.001459	326-377	-	88.77	4.58	1	PF01602,PF08752,PF16381,PF13646	4	-	0	0.666667
P41541	ENSBTAG00000017028	USO1	novel.circ.001459	326-377	-	87.6	4.51	1	PF04869,PF18770,PF04871	3	-	0	0.666667
A2VE39	ENSBTAG00000017091	CMTR1	novel.circ.002840	222-273	-	87.45	5.27	1	PF01728,PF01585	2	-	0	0.666667
P41541	ENSBTAG00000017028	USO1	novel.circ.001323	551-602	-	87.19	4.25	1	PF04869,PF18770,PF04871	3	-	0	0.666667
A2VE21	ENSBTAG00000017245	COPG2	novel.circ.001323	551-602	-	86.4	4.21	1	PF01602,PF08752,PF16381,PF13646	4	-	0	0.666667
A2VE39	ENSBTAG00000017091	CMTR1	novel.circ.001771	156-207	-	85.93	5.17	1	PF01728,PF01585	2	-	0	0.666667
A2VE39	ENSBTAG00000017091	CMTR1	novel.circ.001459	326-377	-	84.72	4.33	1	PF01728,PF01585	2	-	0	0.666667
A2VE21	ENSBTAG00000017245	COPG2	novel.circ.002187	220-271	-	83.51	4.42	1	PF01602,PF08752,PF16381,PF13646	4	-	0	0.666667
A2VE21	ENSBTAG00000017245	COPG2	novel.circ.001469	1-52	-	83.12	4.98	1	PF01602,PF08752,PF16381,PF13646	4	-	0	0.666667
Q08E13	ENSBTAG00000015767	RNF10	novel.circ.000011	51-102	-	83.09	4.98	1	PF13639,PF00097,PF13445	3	-	0	0.666667
A6QNM2	ENSBTAG00000015519	GFM2	novel.circ.000011	51-102	-	82.52	4.94	1	PF00009,PF14492,PF00679,PF03764,PF03144	5	-	0	0.666667
A6QNM2	ENSBTAG00000015519	GFM2	novel.circ.002538	287-12	back-splicing_junction	82.03	4.91	1	PF00009,PF14492,PF00679,PF03764,PF03144	5	-	0	0.666667
P41541	ENSBTAG00000017028	USO1	novel.circ.001469	1-52	-	81.96	4.9	1	PF04869,PF18770,PF04871	3	-	0	0.666667
Q08E13	ENSBTAG00000015767	RNF10	novel.circ.002538	287-12	back-splicing_junction	81.87	4.89	1	PF13639,PF00097,PF13445	3	-	0	0.666667
P41541	ENSBTAG00000017028	USO1	novel.circ.002187	220-271	-	81.77	4.32	1	PF04869,PF18770,PF04871	3	-	0	0.666667
Q865B7	ENSBTAG00000017024	PPARGC1A	novel.circ.000011	51-102	-	80.57	4.8	1	PF00076	1	-	0	0.666667
A2VE39	ENSBTAG00000017091	CMTR1	novel.circ.002187	220-271	-	80.09	4.21	1	PF01728,PF01585	2	-	0	0.666667
Q865B7	ENSBTAG00000017024	PPARGC1A	novel.circ.002538	287-12	back-splicing_junction	79.77	4.75	1	PF00076	1	-	0	0.666667
A2VE21	ENSBTAG00000017245	COPG2	novel.circ.002764	178-229	-	79.62	4.02	1	PF01602,PF08752,PF16381,PF13646	4	-	0	0.666667
A2VE21	ENSBTAG00000017245	COPG2	novel.circ.002217	151-202	-	79.56	4.74	1	PF01602,PF08752,PF16381,PF13646	4	-	0	0.666667
A2VE39	ENSBTAG00000017091	CMTR1	novel.circ.001469	1-52	-	79.2	4.71	1	PF01728,PF01585	2	-	0	0.666667
A2VE21	ENSBTAG00000017245	COPG2	novel.circ.001853	133-184	-	78.33	4.1	1	PF01602,PF08752,PF16381,PF13646	4	-	0	0.666667
P41541	ENSBTAG00000017028	USO1	novel.circ.002217	151-202	-	77.52	4.6	1	PF04869,PF18770,PF04871	3	-	0	0.666667
Q3SYU1	ENSBTAG00000016528	NOC2L	novel.circ.000011	51-102	-	77.35	4.59	1	PF03715	1	-	0	0.666667
P41541	ENSBTAG00000017028	USO1	novel.circ.001853	133-184	-	76.76	4.01	1	PF04869,PF18770,PF04871	3	-	0	0.666667
A2VE39	ENSBTAG00000017091	CMTR1	novel.circ.002217	151-202	-	76.63	4.54	1	PF01728,PF01585	2	-	0	0.666667
Q3SYU1	ENSBTAG00000016528	NOC2L	novel.circ.002538	287-12	back-splicing_junction	76.55	4.53	1	PF03715	1	-	0	0.666667
A3KMV5	ENSBTAG00000016764	UBA1	novel.circ.000011	51-102	-	74.29	4.38	1	PF00899,PF10585,PF09358,PF16190,PF16191	6	-	0	0.666667
A3KMV5	ENSBTAG00000016764	UBA1	novel.circ.002538	287-12	back-splicing_junction	73.9	4.35	1	PF00899,PF10585,PF09358,PF16190,PF16191	6	-	0	0.666667
Q08E13	ENSBTAG00000015767	RNF10	novel.circ.002840	222-273	-	73.58	4.33	1	PF13639,PF00097,PF13445	3	-	0	0.666667
A6QNM2	ENSBTAG00000015519	GFM2	novel.circ.002840	222-273	-	73.5	4.32	1	PF00009,PF14492,PF00679,PF03764,PF03144	5	-	0	0.666667
A6QNM2	ENSBTAG00000015519	GFM2	novel.circ.001771	156-207	-	72.57	4.26	1	PF00009,PF14492,PF00679,PF03764,PF03144	5	-	0	0.666667
Q08E13	ENSBTAG00000015767	RNF10	novel.circ.001771	156-207	-	72.46	4.25	1	PF13639,PF00097,PF13445	3	-	0	0.666667
Q865B7	ENSBTAG00000017024	PPARGC1A	novel.circ.002840	222-273	-	71.95	4.22	1	PF00076	1	-	0	0.666667
P41541	ENSBTAG00000017028	USO1	novel.circ.002631	211-262	-	71.14	4.16	1	PF04869,PF18770,PF04871	3	-	0	0.666667
Q865B7	ENSBTAG00000017024	PPARGC1A	novel.circ.001771	156-207	-	70.96	4.15	1	PF00076	1	-	0	0.666667
P49951	ENSBTAG00000016708	CLTC	novel.circ.000011	51-102	-	70.68	4.13	1	PF00637,PF01394,PF13838,PF09268	14	-	0	0.666667
A2VE21	ENSBTAG00000017245	COPG2	novel.circ.001068	76-127	-	70.57	4.12	1	PF01602,PF08752,PF16381,PF13646	4	-	0	0.666667
P49951	ENSBTAG00000016708	CLTC	novel.circ.002538	287-12	back-splicing_junction	70.11	4.09	1	PF00637,PF01394,PF13838,PF09268	14	-	0	0.666667
P41541	ENSBTAG00000017028	USO1	novel.circ.001068	76-127	-	69.75	4.07	1	PF04869,PF18770,PF04871	3	-	0	0.666667
A2VE21	ENSBTAG00000017245	COPG2	novel.circ.002631	211-262	-	69.42	4.05	1	PF01602,PF08752,PF16381,PF13646	4	-	0	0.666667
Q3SYU1	ENSBTAG00000016528	NOC2L	novel.circ.002840	222-273	-	69.37	4.04	1	PF03715	1	-	0	0.666667
A2VE21	ENSBTAG00000017245	COPG2	novel.circ.000157	136-12	back-splicing_junction	67.66	4.09	1	PF01602,PF08752,PF16381,PF13646	4	-	0	0.666667
Q3MHH4	ENSBTAG00000018928	QARS1	novel.circ.003863	315-366	-	102.06	4.77	1	PF00749,PF04558,PF03950,PF04557	4	-	0	0.666667
Q3B7N2	ENSBTAG00000018255	ACTN1	novel.circ.003863	315-366	-	100.14	4.66	1	PF00435,PF00307,PF08726,PF11971	8	-	0	0.666667
Q3MHH4	ENSBTAG00000018928	QARS1	novel.circ.000847	609-662	-	93.45	4.29	1	PF00749,PF04558,PF03950,PF04557	4	-	0	0.666667
Q3B7N2	ENSBTAG00000018255	ACTN1	novel.circ.000847	609-662	-	91.5	4.18	1	PF00435,PF00307,PF08726,PF11971	8	-	0	0.666667
Q3MHH4	ENSBTAG00000018928	QARS1	novel.circ.000011	51-102	-	89.04	5.38	1	PF00749,PF04558,PF03950,PF04557	4	-	0	0.666667
A7YWD2	ENSBTAG00000018887	IPO13	novel.circ.003863	315-366	-	88.95	4.04	1	PF18786,PF08389,PF18806,PF18773,PF03810	6	-	0	0.666667
Q3MHH4	ENSBTAG00000018928	QARS1	novel.circ.002538	287-12	back-splicing_junction	88.55	5.35	1	PF00749,PF04558,PF03950,PF04557	4	-	0	0.666667
Q3B7N2	ENSBTAG00000018255	ACTN1	novel.circ.000011	51-102	-	87.27	5.26	1	PF00435,PF00307,PF08726,PF11971	8	-	0	0.666667
Q3B7N2	ENSBTAG00000018255	ACTN1	novel.circ.002538	287-12	back-splicing_junction	86.41	5.2	1	PF00435,PF00307,PF08726,PF11971	8	-	0	0.666667
Q3MHH4	ENSBTAG00000018928	QARS1	novel.circ.002511	26-77	-	79.87	4.2	1	PF00749,PF04558,PF03950,PF04557	4	-	0	0.666667
Q3B7N2	ENSBTAG00000018255	ACTN1	novel.circ.002511	26-77	-	78.58	4.12	1	PF00435,PF00307,PF08726,PF11971	8	-	0	0.666667
Q3MHH4	ENSBTAG00000018928	QARS1	novel.circ.001771	156-207	-	78.34	4.65	1	PF00749,PF04558,PF03950,PF04557	4	-	0	0.666667
Q3MHH4	ENSBTAG00000018928	QARS1	novel.circ.002840	222-273	-	78.3	4.65	1	PF00749,PF04558,PF03950,PF04557	4	-	0	0.666667
A7YWD2	ENSBTAG00000018887	IPO13	novel.circ.000011	51-102	-	77.69	4.61	1	PF18786,PF08389,PF18806,PF18773,PF03810	6	-	0	0.666667
Q3B7N2	ENSBTAG00000018255	ACTN1	novel.circ.002840	222-273	-	77.31	4.58	1	PF00435,PF00307,PF08726,PF11971	8	-	0	0.666667
A7YWD2	ENSBTAG00000018887	IPO13	novel.circ.002538	287-12	back-splicing_junction	77.15	4.57	1	PF18786,PF08389,PF18806,PF18773,PF03810	6	-	0	0.666667
Q3B7N2	ENSBTAG00000018255	ACTN1	novel.circ.001771	156-207	-	76.72	4.54	1	PF00435,PF00307,PF08726,PF11971	8	-	0	0.666667
Q1RMS6	ENSBTAG00000018548	INTS7	novel.circ.000011	51-102	-	74.16	4.37	1	-	0	-	0	0.666667
Q1RMS6	ENSBTAG00000018548	INTS7	novel.circ.002538	287-12	back-splicing_junction	73.62	4.33	1	-	0	-	0	0.666667
Q3MHH4	ENSBTAG00000018928	QARS1	novel.circ.001469	1-52	-	72.5	4.26	1	PF00749,PF04558,PF03950,PF04557	4	-	0	0.666667
Q3B7N2	ENSBTAG00000018255	ACTN1	novel.circ.001469	1-52	-	70.45	4.12	1	PF00435,PF00307,PF08726,PF11971	8	-	0	0.666667
A7YWD2	ENSBTAG00000018887	IPO13	novel.circ.002840	222-273	-	69.16	4.03	1	PF18786,PF08389,PF18806,PF18773,PF03810	6	-	0	0.666667
Q28141	ENSBTAG00000019821	DHX9	novel.circ.003863	315-366	-	131.64	6.43	1	PF00035,PF00271,PF04408,PF07717,PF00270	6	-	0	0.666667
A7Z019	ENSBTAG00000019220	SMARCA4	novel.circ.003863	315-366	-	121.78	5.88	1	PF00176,PF00271,PF00439,PF14619,PF07529,PF07533,PF08880,PF04851	8	-	0	0.666667
Q2KJC1	ENSBTAG00000020012	CDC5L	novel.circ.003863	315-366	-	121.45	5.86	1	PF11831,PF00249,PF13921	5	-	0	0.666667
Q28141	ENSBTAG00000019821	DHX9	novel.circ.000847	609-662	-	120.44	5.8	1	PF00035,PF00271,PF04408,PF07717,PF00270	6	-	0	0.666667
Q28141	ENSBTAG00000019821	DHX9	novel.circ.001549	1250-1307	-	116.34	5.35	1	PF00035,PF00271,PF04408,PF07717,PF00270	6	-	0	0.666667
Q28141	ENSBTAG00000019821	DHX9	novel.circ.000011	51-102	-	115.24	7.17	1	PF00035,PF00271,PF04408,PF07717,PF00270	6	-	0	0.666667
Q28141	ENSBTAG00000019821	DHX9	novel.circ.002538	287-12	back-splicing_junction	114.12	7.09	1	PF00035,PF00271,PF04408,PF07717,PF00270	6	-	0	0.666667
Q2KJC1	ENSBTAG00000020012	CDC5L	novel.circ.000847	609-662	-	111.31	5.29	1	PF11831,PF00249,PF13921	5	-	0	0.666667
Q28141	ENSBTAG00000019821	DHX9	novel.circ.003627	726-777	-	110.86	5.4	1	PF00035,PF00271,PF04408,PF07717,PF00270	6	-	0	0.666667
A7Z019	ENSBTAG00000019220	SMARCA4	novel.circ.000847	609-662	-	110.51	5.25	1	PF00176,PF00271,PF00439,PF14619,PF07529,PF07533,PF08880,PF04851	8	-	0	0.666667
A7Z019	ENSBTAG00000019220	SMARCA4	novel.circ.001549	1233-1290	-	109.95	5	1	PF00176,PF00271,PF00439,PF14619,PF07529,PF07533,PF08880,PF04851	8	-	0	0.666667
Q28141	ENSBTAG00000019821	DHX9	novel.circ.004067	971-37	back-splicing_junction	106.8	5.17	1	PF00035,PF00271,PF04408,PF07717,PF00270	6	-	0	0.666667
A7Z019	ENSBTAG00000019220	SMARCA4	novel.circ.000011	51-102	-	106.12	6.55	1	PF00176,PF00271,PF00439,PF14619,PF07529,PF07533,PF08880,PF04851	8	-	0	0.666667
Q2KJC1	ENSBTAG00000020012	CDC5L	novel.circ.000011	51-102	-	106.11	6.54	1	PF11831,PF00249,PF13921	5	-	0	0.666667
A7Z019	ENSBTAG00000019220	SMARCA4	novel.circ.002538	287-12	back-splicing_junction	105.01	6.47	1	PF00176,PF00271,PF00439,PF14619,PF07529,PF07533,PF08880,PF04851	8	-	0	0.666667
Q2KJC1	ENSBTAG00000020012	CDC5L	novel.circ.002538	287-12	back-splicing_junction	105	6.47	1	PF11831,PF00249,PF13921	5	-	0	0.666667
Q2KJC1	ENSBTAG00000020012	CDC5L	novel.circ.001549	1250-1307	-	104.6	4.71	1	PF11831,PF00249,PF13921	5	-	0	0.666667
Q28141	ENSBTAG00000019821	DHX9	novel.circ.002511	26-77	-	103.06	5.64	1	PF00035,PF00271,PF04408,PF07717,PF00270	6	-	0	0.666667
A7Z019	ENSBTAG00000019220	SMARCA4	novel.circ.003627	726-777	-	102.94	4.95	1	PF00176,PF00271,PF00439,PF14619,PF07529,PF07533,PF08880,PF04851	8	-	0	0.666667
A7Z019	ENSBTAG00000019220	SMARCA4	novel.circ.001300	1280-1369	-	102.55	4.44	1	PF00176,PF00271,PF00439,PF14619,PF07529,PF07533,PF08880,PF04851	8	-	0	0.666667
Q2KJC1	ENSBTAG00000020012	CDC5L	novel.circ.000493	1109-1160	-	101.84	4.76	1	PF11831,PF00249,PF13921	5	-	0	0.666667
Q28141	ENSBTAG00000019821	DHX9	novel.circ.002840	222-273	-	101.76	6.25	1	PF00035,PF00271,PF04408,PF07717,PF00270	6	-	0	0.666667
Q28141	ENSBTAG00000019821	DHX9	novel.circ.001771	156-207	-	101.74	6.25	1	PF00035,PF00271,PF04408,PF07717,PF00270	6	-	0	0.666667
Q2KJC1	ENSBTAG00000020012	CDC5L	novel.circ.003627	726-777	-	101.54	4.87	1	PF11831,PF00249,PF13921	5	-	0	0.666667
Q28141	ENSBTAG00000019821	DHX9	novel.circ.001459	326-377	-	100.47	5.29	1	PF00035,PF00271,PF04408,PF07717,PF00270	6	-	0	0.666667
Q28141	ENSBTAG00000019821	DHX9	novel.circ.001300	1280-1369	-	100.29	4.31	1	PF00035,PF00271,PF04408,PF07717,PF00270	6	-	0	0.666667
Q28141	ENSBTAG00000019821	DHX9	novel.circ.001945	151-202	-	99.8	4.62	1	PF00035,PF00271,PF04408,PF07717,PF00270	6	-	0	0.666667
Q2KJC1	ENSBTAG00000020012	CDC5L	novel.circ.004067	971-37	back-splicing_junction	99.73	4.77	1	PF11831,PF00249,PF13921	5	-	0	0.666667
A7Z019	ENSBTAG00000019220	SMARCA4	novel.circ.000493	1109-1160	-	99.31	4.62	1	PF00176,PF00271,PF00439,PF14619,PF07529,PF07533,PF08880,PF04851	8	-	0	0.666667
Q28141	ENSBTAG00000019821	DHX9	novel.circ.001323	551-602	-	99.16	4.95	1	PF00035,PF00271,PF04408,PF07717,PF00270	6	-	0	0.666667
Q28141	ENSBTAG00000019821	DHX9	novel.circ.003355	308-359	-	98.22	4.55	1	PF00035,PF00271,PF04408,PF07717,PF00270	6	-	0	0.666667
Q28141	ENSBTAG00000019821	DHX9	novel.circ.000597	1043-1094	-	97.77	4.53	1	PF00035,PF00271,PF04408,PF07717,PF00270	6	-	0	0.666667
A7Z019	ENSBTAG00000019220	SMARCA4	novel.circ.004067	971-37	back-splicing_junction	96.35	4.58	1	PF00176,PF00271,PF00439,PF14619,PF07529,PF07533,PF08880,PF04851	8	-	0	0.666667
Q29RK2	ENSBTAG00000019700	PC	novel.circ.003863	315-366	-	96.35	4.45	1	PF02786,PF02436,PF00289,PF02785,PF00682,PF00364,PF07478	7	-	0	0.666667
Q2KJC1	ENSBTAG00000020012	CDC5L	novel.circ.002511	26-77	-	95.93	5.2	1	PF11831,PF00249,PF13921	5	-	0	0.666667
Q28141	ENSBTAG00000019821	DHX9	novel.circ.000848	1541-1610	-	95.91	4.29	1	PF00035,PF00271,PF04408,PF07717,PF00270	6	-	0	0.666667
A7Z019	ENSBTAG00000019220	SMARCA4	novel.circ.002511	13-64	-	94.48	5.11	1	PF00176,PF00271,PF00439,PF14619,PF07529,PF07533,PF08880,PF04851	8	-	0	0.666667
Q28141	ENSBTAG00000019821	DHX9	novel.circ.002876	232-307	-	94.29	4.17	1	PF00035,PF00271,PF04408,PF07717,PF00270	6	-	0	0.666667
Q2KJC1	ENSBTAG00000020012	CDC5L	novel.circ.002840	222-273	-	94.14	5.73	1	PF11831,PF00249,PF13921	5	-	0	0.666667
Q28141	ENSBTAG00000019821	DHX9	novel.circ.000685	1887-57	back-splicing_junction	93.99	4.15	1	PF00035,PF00271,PF04408,PF07717,PF00270	6	-	0	0.666667
Q28141	ENSBTAG00000019821	DHX9	novel.circ.001469	1-52	-	93.68	5.7	1	PF00035,PF00271,PF04408,PF07717,PF00270	6	-	0	0.666667
A7Z019	ENSBTAG00000019220	SMARCA4	novel.circ.001771	151-202	-	93.6	5.69	1	PF00176,PF00271,PF00439,PF14619,PF07529,PF07533,PF08880,PF04851	8	-	0	0.666667
A7Z019	ENSBTAG00000019220	SMARCA4	novel.circ.001945	151-202	-	93.6	4.28	1	PF00176,PF00271,PF00439,PF14619,PF07529,PF07533,PF08880,PF04851	8	-	0	0.666667
Q28141	ENSBTAG00000019821	DHX9	novel.circ.002187	220-271	-	93.57	5.05	1	PF00035,PF00271,PF04408,PF07717,PF00270	6	-	0	0.666667
A7Z019	ENSBTAG00000019220	SMARCA4	novel.circ.001323	551-602	-	93.45	4.62	1	PF00176,PF00271,PF00439,PF14619,PF07529,PF07533,PF08880,PF04851	8	-	0	0.666667
Q2KJC1	ENSBTAG00000020012	CDC5L	novel.circ.001771	156-207	-	93.28	5.67	1	PF11831,PF00249,PF13921	5	-	0	0.666667
A7Z019	ENSBTAG00000019220	SMARCA4	novel.circ.002840	222-273	-	93.2	5.67	1	PF00176,PF00271,PF00439,PF14619,PF07529,PF07533,PF08880,PF04851	8	-	0	0.666667
Q28141	ENSBTAG00000019821	DHX9	novel.circ.000408	830-12	back-splicing_junction	92.71	4.5	1	PF00035,PF00271,PF04408,PF07717,PF00270	6	-	0	0.666667
A6QR44	ENSBTAG00000019869	DGCR8	novel.circ.003863	315-366	-	92.64	4.24	1	PF00035	2	-	0	0.666667
Q2KJC1	ENSBTAG00000020012	CDC5L	novel.circ.001459	326-377	-	91.92	4.77	1	PF11831,PF00249,PF13921	5	-	0	0.666667
A7Z019	ENSBTAG00000019220	SMARCA4	novel.circ.001459	326-377	-	91.71	4.76	1	PF00176,PF00271,PF00439,PF14619,PF07529,PF07533,PF08880,PF04851	8	-	0	0.666667
A7Z019	ENSBTAG00000019220	SMARCA4	novel.circ.000848	1541-1610	-	91.35	4.03	1	PF00176,PF00271,PF00439,PF14619,PF07529,PF07533,PF08880,PF04851	8	-	0	0.666667
Q2KJC1	ENSBTAG00000020012	CDC5L	novel.circ.003355	308-359	-	91.32	4.17	1	PF11831,PF00249,PF13921	5	-	0	0.666667
Q28141	ENSBTAG00000019821	DHX9	novel.circ.001344	1027-1082	-	91.15	4.16	1	PF00035,PF00271,PF04408,PF07717,PF00270	6	-	0	0.666667
P15396	ENSBTAG00000020196	ENPP3	novel.circ.003863	315-366	-	90.91	4.14	1	PF01663,PF01033,PF01223	4	-	0	0.666667
Q2KJC1	ENSBTAG00000020012	CDC5L	novel.circ.001945	151-202	-	90.79	4.12	1	PF11831,PF00249,PF13921	5	-	0	0.666667
Q28141	ENSBTAG00000019821	DHX9	novel.circ.000720	476-527	-	90.55	4.25	1	PF00035,PF00271,PF04408,PF07717,PF00270	6	-	0	0.666667
Q28141	ENSBTAG00000019821	DHX9	novel.circ.001243	101-152	-	90.29	4.43	1	PF00035,PF00271,PF04408,PF07717,PF00270	6	-	0	0.666667
Q28141	ENSBTAG00000019821	DHX9	novel.circ.003199	1001-1052	-	90.27	4.23	1	PF00035,PF00271,PF04408,PF07717,PF00270	6	-	0	0.666667
Q2KJC1	ENSBTAG00000020012	CDC5L	novel.circ.001323	551-602	-	90.16	4.43	1	PF11831,PF00249,PF13921	5	-	0	0.666667
A7Z019	ENSBTAG00000019220	SMARCA4	novel.circ.000597	1043-1094	-	90.02	4.09	1	PF00176,PF00271,PF00439,PF14619,PF07529,PF07533,PF08880,PF04851	8	-	0	0.666667
Q2KJC1	ENSBTAG00000020012	CDC5L	novel.circ.000597	1043-1094	-	89.96	4.09	1	PF11831,PF00249,PF13921	5	-	0	0.666667
Q28141	ENSBTAG00000019821	DHX9	novel.circ.001814	801-852	-	89.95	4.21	1	PF00035,PF00271,PF04408,PF07717,PF00270	6	-	0	0.666667
A7Z019	ENSBTAG00000019220	SMARCA4	novel.circ.003355	308-359	-	89.23	4.05	1	PF00176,PF00271,PF00439,PF14619,PF07529,PF07533,PF08880,PF04851	8	-	0	0.666667
Q28141	ENSBTAG00000019821	DHX9	novel.circ.002217	151-202	-	88.48	5.34	1	PF00035,PF00271,PF04408,PF07717,PF00270	6	-	0	0.666667
Q29RK2	ENSBTAG00000019700	PC	novel.circ.000847	609-662	-	88.36	4	1	PF02786,PF02436,PF00289,PF02785,PF00682,PF00364,PF07478	7	-	0	0.666667
Q28141	ENSBTAG00000019821	DHX9	novel.circ.001853	133-184	-	87.06	4.65	1	PF00035,PF00271,PF04408,PF07717,PF00270	6	-	0	0.666667
Q28141	ENSBTAG00000019821	DHX9	novel.circ.003156	465-516	-	86.28	4.2	1	PF00035,PF00271,PF04408,PF07717,PF00270	6	-	0	0.666667
Q2KJC1	ENSBTAG00000020012	CDC5L	novel.circ.002187	220-271	-	86.25	4.6	1	PF11831,PF00249,PF13921	5	-	0	0.666667
A7Z019	ENSBTAG00000019220	SMARCA4	novel.circ.001469	1-52	-	86.09	5.18	1	PF00176,PF00271,PF00439,PF14619,PF07529,PF07533,PF08880,PF04851	8	-	0	0.666667
Q2KJC1	ENSBTAG00000020012	CDC5L	novel.circ.001469	1-52	-	86.06	5.18	1	PF11831,PF00249,PF13921	5	-	0	0.666667
A7Z019	ENSBTAG00000019220	SMARCA4	novel.circ.000408	830-12	back-splicing_junction	85.81	4.1	1	PF00176,PF00271,PF00439,PF14619,PF07529,PF07533,PF08880,PF04851	8	-	0	0.666667
A7Z019	ENSBTAG00000019220	SMARCA4	novel.circ.002187	220-271	-	85.35	4.54	1	PF00176,PF00271,PF00439,PF14619,PF07529,PF07533,PF08880,PF04851	8	-	0	0.666667
Q2KJC1	ENSBTAG00000020012	CDC5L	novel.circ.000408	830-12	back-splicing_junction	84.99	4.05	1	PF11831,PF00249,PF13921	5	-	0	0.666667
Q28141	ENSBTAG00000019821	DHX9	novel.circ.000246	101-152	-	84.81	4.51	1	PF00035,PF00271,PF04408,PF07717,PF00270	6	-	0	0.666667
Q28141	ENSBTAG00000019821	DHX9	novel.circ.003020	209-260	-	84.37	4.48	1	PF00035,PF00271,PF04408,PF07717,PF00270	6	-	0	0.666667
A7Z019	ENSBTAG00000019220	SMARCA4	novel.circ.001243	101-152	-	84.36	4.09	1	PF00176,PF00271,PF00439,PF14619,PF07529,PF07533,PF08880,PF04851	8	-	0	0.666667
Q28141	ENSBTAG00000019821	DHX9	novel.circ.000696	176-227	-	84.23	4.47	1	PF00035,PF00271,PF04408,PF07717,PF00270	6	-	0	0.666667
Q29RK2	ENSBTAG00000019700	PC	novel.circ.000011	51-102	-	84.17	5.05	1	PF02786,PF02436,PF00289,PF02785,PF00682,PF00364,PF07478	7	-	0	0.666667
Q29RK2	ENSBTAG00000019700	PC	novel.circ.002538	287-12	back-splicing_junction	83.72	5.02	1	PF02786,PF02436,PF00289,PF02785,PF00682,PF00364,PF07478	7	-	0	0.666667
Q28141	ENSBTAG00000019821	DHX9	novel.circ.002459	270-321	-	83.62	4.43	1	PF00035,PF00271,PF04408,PF07717,PF00270	6	-	0	0.666667
Q2KJC1	ENSBTAG00000020012	CDC5L	novel.circ.001243	26-77	-	83.39	4.03	1	PF11831,PF00249,PF13921	5	-	0	0.666667
Q28141	ENSBTAG00000019821	DHX9	novel.circ.003262	276-327	-	83.28	4.41	1	PF00035,PF00271,PF04408,PF07717,PF00270	6	-	0	0.666667
Q28141	ENSBTAG00000019821	DHX9	novel.circ.000224	522-12	back-splicing_junction	83.15	4.24	1	PF00035,PF00271,PF04408,PF07717,PF00270	6	-	0	0.666667
Q28141	ENSBTAG00000019821	DHX9	novel.circ.001267	176-227	-	82.46	4.36	1	PF00035,PF00271,PF04408,PF07717,PF00270	6	-	0	0.666667
Q2KJC1	ENSBTAG00000020012	CDC5L	novel.circ.002217	151-202	-	82.22	4.92	1	PF11831,PF00249,PF13921	5	-	0	0.666667
Q28141	ENSBTAG00000019821	DHX9	novel.circ.001049	101-152	-	82.16	4.18	1	PF00035,PF00271,PF04408,PF07717,PF00270	6	-	0	0.666667
Q28141	ENSBTAG00000019821	DHX9	novel.circ.000980	407-37	back-splicing_junction	82.11	4.34	1	PF00035,PF00271,PF04408,PF07717,PF00270	6	-	0	0.666667
Q2KJC1	ENSBTAG00000020012	CDC5L	novel.circ.002764	178-229	-	82.04	4.17	1	PF11831,PF00249,PF13921	5	-	0	0.666667
Q28141	ENSBTAG00000019821	DHX9	novel.circ.002631	211-262	-	80.7	4.81	1	PF00035,PF00271,PF04408,PF07717,PF00270	6	-	0	0.666667
Q2KJC1	ENSBTAG00000020012	CDC5L	novel.circ.001853	133-184	-	80.68	4.25	1	PF11831,PF00249,PF13921	5	-	0	0.666667
A6QR44	ENSBTAG00000019869	DGCR8	novel.circ.000011	51-102	-	80.54	4.8	1	PF00035	2	-	0	0.666667
Q28141	ENSBTAG00000019821	DHX9	novel.circ.000876	395-446	-	80.53	4.08	1	PF00035,PF00271,PF04408,PF07717,PF00270	6	-	0	0.666667
Q28141	ENSBTAG00000019821	DHX9	novel.circ.003707	1-52	-	80.51	4.08	1	PF00035,PF00271,PF04408,PF07717,PF00270	6	-	0	0.666667
A7Z019	ENSBTAG00000019220	SMARCA4	novel.circ.002217	151-202	-	80.38	4.79	1	PF00176,PF00271,PF00439,PF14619,PF07529,PF07533,PF08880,PF04851	8	-	0	0.666667
A6QR44	ENSBTAG00000019869	DGCR8	novel.circ.002538	287-12	back-splicing_junction	80	4.77	1	PF00035	2	-	0	0.666667
P15396	ENSBTAG00000020196	ENPP3	novel.circ.000011	51-102	-	79.73	4.75	1	PF01663,PF01033,PF01223	4	-	0	0.666667
A7Z019	ENSBTAG00000019220	SMARCA4	novel.circ.001853	133-184	-	79.66	4.19	1	PF00176,PF00271,PF00439,PF14619,PF07529,PF07533,PF08880,PF04851	8	-	0	0.666667
Q28141	ENSBTAG00000019821	DHX9	novel.circ.001068	76-127	-	79.44	4.73	1	PF00035,PF00271,PF04408,PF07717,PF00270	6	-	0	0.666667
P15396	ENSBTAG00000020196	ENPP3	novel.circ.002538	287-12	back-splicing_junction	79.32	4.72	1	PF01663,PF01033,PF01223	4	-	0	0.666667
A7Z019	ENSBTAG00000019220	SMARCA4	novel.circ.000246	101-152	-	79.08	4.15	1	PF00176,PF00271,PF00439,PF14619,PF07529,PF07533,PF08880,PF04851	8	-	0	0.666667
Q2KJC1	ENSBTAG00000020012	CDC5L	novel.circ.003020	209-260	-	79.03	4.15	1	PF11831,PF00249,PF13921	5	-	0	0.666667
A7Z019	ENSBTAG00000019220	SMARCA4	novel.circ.000696	6-57	-	78.6	4.12	1	PF00176,PF00271,PF00439,PF14619,PF07529,PF07533,PF08880,PF04851	8	-	0	0.666667
Q2KJC1	ENSBTAG00000020012	CDC5L	novel.circ.000246	101-152	-	78.45	4.11	1	PF11831,PF00249,PF13921	5	-	0	0.666667
Q28141	ENSBTAG00000019821	DHX9	novel.circ.004280	326-377	-	78.2	4.09	1	PF00035,PF00271,PF04408,PF07717,PF00270	6	-	0	0.666667
Q28141	ENSBTAG00000019821	DHX9	novel.circ.003292	276-327	-	78.08	4.09	1	PF00035,PF00271,PF04408,PF07717,PF00270	6	-	0	0.666667
A7Z019	ENSBTAG00000019220	SMARCA4	novel.circ.002459	270-321	-	77.9	4.08	1	PF00176,PF00271,PF00439,PF14619,PF07529,PF07533,PF08880,PF04851	8	-	0	0.666667
Q2KJC1	ENSBTAG00000020012	CDC5L	novel.circ.001267	176-227	-	77.89	4.08	1	PF11831,PF00249,PF13921	5	-	0	0.666667
Q28141	ENSBTAG00000019821	DHX9	novel.circ.000933	205-256	-	77.86	4.07	1	PF00035,PF00271,PF04408,PF07717,PF00270	6	-	0	0.666667
A7Z019	ENSBTAG00000019220	SMARCA4	novel.circ.002631	211-262	-	77.8	4.62	1	PF00176,PF00271,PF00439,PF14619,PF07529,PF07533,PF08880,PF04851	8	-	0	0.666667
Q2KJC1	ENSBTAG00000020012	CDC5L	novel.circ.000696	176-227	-	77.68	4.06	1	PF11831,PF00249,PF13921	5	-	0	0.666667
Q28141	ENSBTAG00000019821	DHX9	novel.circ.004338	251-302	-	76.82	4.01	1	PF00035,PF00271,PF04408,PF07717,PF00270	6	-	0	0.666667
Q2KJC1	ENSBTAG00000020012	CDC5L	novel.circ.002459	270-321	-	76.69	4	1	PF11831,PF00249,PF13921	5	-	0	0.666667
E1BNG3	ENSBTAG00000020482	ASCC3	novel.circ.000011	51-102	-	76.37	4.52	1	PF02889,PF00270,PF04851,PF00271	8	-	0	0.666667
E1BNG3	ENSBTAG00000020482	ASCC3	novel.circ.002538	287-12	back-splicing_junction	75.76	4.48	1	PF02889,PF00270,PF04851,PF00271	8	-	0	0.666667
Q29RK2	ENSBTAG00000019700	PC	novel.circ.002840	222-273	-	74.69	4.41	1	PF02786,PF02436,PF00289,PF02785,PF00682,PF00364,PF07478	7	-	0	0.666667
Q28141	ENSBTAG00000019821	DHX9	novel.circ.000157	136-12	back-splicing_junction	74.6	4.57	1	PF00035,PF00271,PF04408,PF07717,PF00270	6	-	0	0.666667
Q28141	ENSBTAG00000019821	DHX9	novel.circ.001482	268-37	back-splicing_junction	74.39	4.38	1	PF00035,PF00271,PF04408,PF07717,PF00270	6	-	0	0.666667
Q29RK2	ENSBTAG00000019700	PC	novel.circ.001771	156-207	-	74.05	4.36	1	PF02786,PF02436,PF00289,PF02785,PF00682,PF00364,PF07478	7	-	0	0.666667
A7Z019	ENSBTAG00000019220	SMARCA4	novel.circ.001068	76-127	-	73.95	4.35	1	PF00176,PF00271,PF00439,PF14619,PF07529,PF07533,PF08880,PF04851	8	-	0	0.666667
Q1RMT1	ENSBTAG00000020777	ERCC3	novel.circ.000011	51-102	-	73.73	4.34	1	PF16203,PF13625,PF04851,PF00271	4	-	0	0.666667
Q1RMT1	ENSBTAG00000020777	ERCC3	novel.circ.002538	287-12	back-splicing_junction	73.03	4.29	1	PF16203,PF13625,PF04851,PF00271	4	-	0	0.666667
Q2KJC1	ENSBTAG00000020012	CDC5L	novel.circ.001068	76-127	-	72.93	4.29	1	PF11831,PF00249,PF13921	5	-	0	0.666667
Q2KJC1	ENSBTAG00000020012	CDC5L	novel.circ.002631	211-262	-	72.12	4.23	1	PF11831,PF00249,PF13921	5	-	0	0.666667
Q28141	ENSBTAG00000019821	DHX9	novel.circ.003014	153-204	-	72.03	4.22	1	PF00035,PF00271,PF04408,PF07717,PF00270	6	-	0	0.666667
A6QR44	ENSBTAG00000019869	DGCR8	novel.circ.001771	156-207	-	71.26	4.17	1	PF00035	2	-	0	0.666667
Q28141	ENSBTAG00000019821	DHX9	novel.circ.002194	140-191	-	71.09	4.16	1	PF00035,PF00271,PF04408,PF07717,PF00270	6	-	0	0.666667
Q76I82	ENSBTAG00000020733	RPS15A	novel.circ.001086	158-209	-	70.96	4.15	1	PF00410	1	-	0	0.666667
Q28141	ENSBTAG00000019821	DHX9	novel.circ.001165	262-12	back-splicing_junction	70.61	4.13	1	PF00035,PF00271,PF04408,PF07717,PF00270	6	-	0	0.666667
P15396	ENSBTAG00000020196	ENPP3	novel.circ.002840	222-273	-	70.52	4.12	1	PF01663,PF01033,PF01223	4	-	0	0.666667
A6QR44	ENSBTAG00000019869	DGCR8	novel.circ.002840	222-273	-	70.49	4.12	1	PF00035	2	-	0	0.666667
P15396	ENSBTAG00000020196	ENPP3	novel.circ.001771	156-207	-	69.98	4.08	1	PF01663,PF01033,PF01223	4	-	0	0.666667
Q2KJC1	ENSBTAG00000020012	CDC5L	novel.circ.000157	136-12	back-splicing_junction	69.63	4.23	1	PF11831,PF00249,PF13921	5	-	0	0.666667
Q28141	ENSBTAG00000019821	DHX9	novel.circ.003170	25-76	-	69.3	4.04	1	PF00035,PF00271,PF04408,PF07717,PF00270	6	-	0	0.666667
Q28141	ENSBTAG00000019821	DHX9	novel.circ.004328	251-37	back-splicing_junction	68.97	4.01	1	PF00035,PF00271,PF04408,PF07717,PF00270	6	-	0	0.666667
Q2KJC1	ENSBTAG00000020012	CDC5L	novel.circ.001482	268-37	back-splicing_junction	68.76	4	1	PF11831,PF00249,PF13921	5	-	0	0.666667
A7Z019	ENSBTAG00000019220	SMARCA4	novel.circ.000157	136-12	back-splicing_junction	68.06	4.12	1	PF00176,PF00271,PF00439,PF14619,PF07529,PF07533,PF08880,PF04851	8	-	0	0.666667
Q0III9	ENSBTAG00000022244	ACTN3	novel.circ.003863	315-366	-	116.02	5.55	1	PF00435,PF00307,PF08726,PF11971	8	-	0	0.666667
Q0III9	ENSBTAG00000022244	ACTN3	novel.circ.000847	609-662	-	106.12	5	1	PF00435,PF00307,PF08726,PF11971	8	-	0	0.666667
Q0III9	ENSBTAG00000022244	ACTN3	novel.circ.001549	1250-1307	-	101.68	4.55	1	PF00435,PF00307,PF08726,PF11971	8	-	0	0.666667
Q0III9	ENSBTAG00000022244	ACTN3	novel.circ.000011	51-102	-	101.46	6.23	1	PF00435,PF00307,PF08726,PF11971	8	-	0	0.666667
Q0III9	ENSBTAG00000022244	ACTN3	novel.circ.002538	287-12	back-splicing_junction	100.6	6.17	1	PF00435,PF00307,PF08726,PF11971	8	-	0	0.666667
Q0III9	ENSBTAG00000022244	ACTN3	novel.circ.003627	726-777	-	97.41	4.64	1	PF00435,PF00307,PF08726,PF11971	8	-	0	0.666667
Q0III9	ENSBTAG00000022244	ACTN3	novel.circ.000493	1109-1160	-	96.76	4.47	1	PF00435,PF00307,PF08726,PF11971	8	-	0	0.666667
Q0III9	ENSBTAG00000022244	ACTN3	novel.circ.004067	971-37	back-splicing_junction	94.66	4.48	1	PF00435,PF00307,PF08726,PF11971	8	-	0	0.666667
Q0III9	ENSBTAG00000022244	ACTN3	novel.circ.002511	26-77	-	90.85	4.88	1	PF00435,PF00307,PF08726,PF11971	8	-	0	0.666667
Q0III9	ENSBTAG00000022244	ACTN3	novel.circ.001771	156-207	-	89.74	5.43	1	PF00435,PF00307,PF08726,PF11971	8	-	0	0.666667
Q0III9	ENSBTAG00000022244	ACTN3	novel.circ.002840	222-273	-	89.63	5.42	1	PF00435,PF00307,PF08726,PF11971	8	-	0	0.666667
Q0III9	ENSBTAG00000022244	ACTN3	novel.circ.001459	326-377	-	88.01	4.53	1	PF00435,PF00307,PF08726,PF11971	8	-	0	0.666667
Q0III9	ENSBTAG00000022244	ACTN3	novel.circ.001323	551-602	-	86.79	4.23	1	PF00435,PF00307,PF08726,PF11971	8	-	0	0.666667
Q0III9	ENSBTAG00000022244	ACTN3	novel.circ.002187	220-271	-	82.38	4.36	1	PF00435,PF00307,PF08726,PF11971	8	-	0	0.666667
Q0III9	ENSBTAG00000022244	ACTN3	novel.circ.001469	1-52	-	82.18	4.92	1	PF00435,PF00307,PF08726,PF11971	8	-	0	0.666667
Q0III9	ENSBTAG00000022244	ACTN3	novel.circ.002217	151-202	-	77.94	4.63	1	PF00435,PF00307,PF08726,PF11971	8	-	0	0.666667
Q0III9	ENSBTAG00000022244	ACTN3	novel.circ.001853	133-184	-	77.04	4.02	1	PF00435,PF00307,PF08726,PF11971	8	-	0	0.666667
Q0III9	ENSBTAG00000022244	ACTN3	novel.circ.002631	211-262	-	70.6	4.13	1	PF00435,PF00307,PF08726,PF11971	8	-	0	0.666667
Q0III9	ENSBTAG00000022244	ACTN3	novel.circ.001068	76-127	-	69.95	4.08	1	PF00435,PF00307,PF08726,PF11971	8	-	0	0.666667
Q0III9	ENSBTAG00000022244	ACTN3	novel.circ.000157	136-12	back-splicing_junction	66.5	4.02	1	PF00435,PF00307,PF08726,PF11971	8	-	0	0.666667
A0JN52	ENSBTAG00000010627	SF3B3	novel.circ.003863	315-366	-	120.4	5.8	1	PF10433,PF03178	2	-	0	0.666667
A0JN52	ENSBTAG00000010627	SF3B3	novel.circ.000847	609-662	-	110.47	5.24	1	PF10433,PF03178	2	-	0	0.666667
A5D7D1	ENSBTAG00000011215	ACTN4	novel.circ.003863	315-366	-	110.34	5.24	1	PF00435,PF00307,PF08726,PF11971	8	-	0	0.666667
Q863B3	ENSBTAG00000010692	SND1	novel.circ.000847	609-662	-	108.56	5.14	1	PF00565,PF00567	6	-	0	0.666667
Q08DF4	ENSBTAG00000011307	DNM1	novel.circ.003863	315-366	-	106.15	5	1	PF01031,PF00350,PF02212,PF00169	4	-	0	0.666667
A0JN52	ENSBTAG00000010627	SF3B3	novel.circ.001549	1250-1307	-	106	4.79	1	PF10433,PF03178	2	-	0	0.666667
A0JN52	ENSBTAG00000010627	SF3B3	novel.circ.000011	51-102	-	105.18	6.48	1	PF10433,PF03178	2	-	0	0.666667
A0JN52	ENSBTAG00000010627	SF3B3	novel.circ.002538	287-12	back-splicing_junction	104.18	6.41	1	PF10433,PF03178	2	-	0	0.666667
Q863B3	ENSBTAG00000010692	SND1	novel.circ.000011	51-102	-	103.95	6.4	1	PF00565,PF00567	6	-	0	0.666667
Q863B3	ENSBTAG00000010692	SND1	novel.circ.002538	287-12	back-splicing_junction	103.26	6.35	1	PF00565,PF00567	6	-	0	0.666667
A0JN52	ENSBTAG00000010627	SF3B3	novel.circ.003627	726-777	-	101.39	4.86	1	PF10433,PF03178	2	-	0	0.666667
A5D7D1	ENSBTAG00000011215	ACTN4	novel.circ.000847	609-662	-	100.5	4.68	1	PF00435,PF00307,PF08726,PF11971	8	-	0	0.666667
A0JN52	ENSBTAG00000010627	SF3B3	novel.circ.000493	1109-1160	-	100.12	4.66	1	PF10433,PF03178	2	-	0	0.666667
Q863B3	ENSBTAG00000010692	SND1	novel.circ.000493	1109-1160	-	99.99	4.66	1	PF00565,PF00567	6	-	0	0.666667
Q863B3	ENSBTAG00000010692	SND1	novel.circ.003627	726-777	-	99.6	4.76	1	PF00565,PF00567	6	-	0	0.666667
Q863B3	ENSBTAG00000010692	SND1	novel.circ.004067	971-37	back-splicing_junction	98.47	4.7	1	PF00565,PF00567	6	-	0	0.666667
A5D7D1	ENSBTAG00000011215	ACTN4	novel.circ.001549	1250-1307	-	97.77	4.33	1	PF00435,PF00307,PF08726,PF11971	8	-	0	0.666667
A0JN52	ENSBTAG00000010627	SF3B3	novel.circ.004067	971-37	back-splicing_junction	97.71	4.65	1	PF10433,PF03178	2	-	0	0.666667
Q08DF4	ENSBTAG00000011307	DNM1	novel.circ.000847	609-662	-	97.56	4.52	1	PF01031,PF00350,PF02212,PF00169	4	-	0	0.666667
Q3ZCH0	ENSBTAG00000011419	HSPA9	novel.circ.003863	315-366	-	96.21	4.44	1	PF00012,PF06723,PF02782	3	-	0	0.666667
A5D7D1	ENSBTAG00000011215	ACTN4	novel.circ.000011	51-102	-	95.94	5.85	1	PF00435,PF00307,PF08726,PF11971	8	-	0	0.666667
A5D7D1	ENSBTAG00000011215	ACTN4	novel.circ.002538	287-12	back-splicing_junction	95.65	5.83	1	PF00435,PF00307,PF08726,PF11971	8	-	0	0.666667
A0JN52	ENSBTAG00000010627	SF3B3	novel.circ.002511	26-77	-	94.76	5.12	1	PF10433,PF03178	2	-	0	0.666667
Q2KJJ0	ENSBTAG00000011656	PRPF6	novel.circ.003863	315-366	-	94.28	4.33	1	PF06424,PF14559	2	-	0	0.666667
Q863B3	ENSBTAG00000010692	SND1	novel.circ.002511	26-77	-	93.77	5.06	1	PF00565,PF00567	6	-	0	0.666667
A0JN52	ENSBTAG00000010627	SF3B3	novel.circ.002840	222-273	-	92.91	5.65	1	PF10433,PF03178	2	-	0	0.666667
Q08DF4	ENSBTAG00000011307	DNM1	novel.circ.000011	51-102	-	92.91	5.65	1	PF01031,PF00350,PF02212,PF00169	4	-	0	0.666667
A0JN52	ENSBTAG00000010627	SF3B3	novel.circ.001771	156-207	-	92.72	5.63	1	PF10433,PF03178	2	-	0	0.666667
A5D7D1	ENSBTAG00000011215	ACTN4	novel.circ.003627	726-777	-	92.6	4.36	1	PF00435,PF00307,PF08726,PF11971	8	-	0	0.666667
Q08DF4	ENSBTAG00000011307	DNM1	novel.circ.002538	287-12	back-splicing_junction	92.04	5.59	1	PF01031,PF00350,PF02212,PF00169	4	-	0	0.666667
Q08DF4	ENSBTAG00000011307	DNM1	novel.circ.001549	1250-1307	-	91.68	4	1	PF01031,PF00350,PF02212,PF00169	4	-	0	0.666667
A0JN52	ENSBTAG00000010627	SF3B3	novel.circ.001459	326-377	-	91.56	4.75	1	PF10433,PF03178	2	-	0	0.666667
Q863B3	ENSBTAG00000010692	SND1	novel.circ.001771	156-207	-	91.39	5.54	1	PF00565,PF00567	6	-	0	0.666667
A5D7D1	ENSBTAG00000011215	ACTN4	novel.circ.000493	1109-1160	-	91.07	4.15	1	PF00435,PF00307,PF08726,PF11971	8	-	0	0.666667
A0JN52	ENSBTAG00000010627	SF3B3	novel.circ.001945	151-202	-	90.99	4.13	1	PF10433,PF03178	2	-	0	0.666667
A0JN52	ENSBTAG00000010627	SF3B3	novel.circ.001323	551-602	-	90.41	4.44	1	PF10433,PF03178	2	-	0	0.666667
A0JN52	ENSBTAG00000010627	SF3B3	novel.circ.003355	308-359	-	89.76	4.08	1	PF10433,PF03178	2	-	0	0.666667
A5D7D1	ENSBTAG00000011215	ACTN4	novel.circ.004067	971-37	back-splicing_junction	89.59	4.19	1	PF00435,PF00307,PF08726,PF11971	8	-	0	0.666667
Q863B3	ENSBTAG00000010692	SND1	novel.circ.003355	308-359	-	89.53	4.07	1	PF00565,PF00567	6	-	0	0.666667
Q08DF4	ENSBTAG00000011307	DNM1	novel.circ.000493	1109-1160	-	89.29	4.05	1	PF01031,PF00350,PF02212,PF00169	4	-	0	0.666667
Q3ZCH0	ENSBTAG00000011419	HSPA9	novel.circ.000847	609-662	-	89.15	4.05	1	PF00012,PF06723,PF02782	3	-	0	0.666667
Q08DF4	ENSBTAG00000011307	DNM1	novel.circ.003627	726-777	-	89	4.16	1	PF01031,PF00350,PF02212,PF00169	4	-	0	0.666667
A0JN52	ENSBTAG00000010627	SF3B3	novel.circ.000597	1043-1094	-	88.95	4.04	1	PF10433,PF03178	2	-	0	0.666667
Q08DF4	ENSBTAG00000011307	DNM1	novel.circ.004067	971-37	back-splicing_junction	88.26	4.12	1	PF01031,PF00350,PF02212,PF00169	4	-	0	0.666667
Q863B3	ENSBTAG00000010692	SND1	novel.circ.001323	551-602	-	87.64	4.28	1	PF00565,PF00567	6	-	0	0.666667
A5D7D1	ENSBTAG00000011215	ACTN4	novel.circ.002511	26-77	-	85.71	4.56	1	PF00435,PF00307,PF08726,PF11971	8	-	0	0.666667
A0JN52	ENSBTAG00000010627	SF3B3	novel.circ.001469	1-52	-	85.54	5.14	1	PF10433,PF03178	2	-	0	0.666667
A0JN52	ENSBTAG00000010627	SF3B3	novel.circ.002187	220-271	-	85.5	4.55	1	PF10433,PF03178	2	-	0	0.666667
A5D7D1	ENSBTAG00000011215	ACTN4	novel.circ.001771	156-207	-	84.98	5.11	1	PF00435,PF00307,PF08726,PF11971	8	-	0	0.666667
Q863B3	ENSBTAG00000010692	SND1	novel.circ.002187	220-271	-	84.55	4.49	1	PF00565,PF00567	6	-	0	0.666667
A0JN52	ENSBTAG00000010627	SF3B3	novel.circ.000408	830-12	back-splicing_junction	84.54	4.02	1	PF10433,PF03178	2	-	0	0.666667
Q3ZCH0	ENSBTAG00000011419	HSPA9	novel.circ.000011	51-102	-	84.52	5.07	1	PF00012,PF06723,PF02782	3	-	0	0.666667
A5D7D1	ENSBTAG00000011215	ACTN4	novel.circ.002840	222-273	-	84.48	5.07	1	PF00435,PF00307,PF08726,PF11971	8	-	0	0.666667
Q863B3	ENSBTAG00000010692	SND1	novel.circ.001469	1-52	-	84.07	5.04	1	PF00565,PF00567	6	-	0	0.666667
Q08DF4	ENSBTAG00000011307	DNM1	novel.circ.002511	26-77	-	84	4.46	1	PF01031,PF00350,PF02212,PF00169	4	-	0	0.666667
Q3ZCH0	ENSBTAG00000011419	HSPA9	novel.circ.002538	287-12	back-splicing_junction	83.51	5.01	1	PF00012,PF06723,PF02782	3	-	0	0.666667
A5D7D1	ENSBTAG00000011215	ACTN4	novel.circ.001459	326-377	-	83.48	4.26	1	PF00435,PF00307,PF08726,PF11971	8	-	0	0.666667
A5D7D1	ENSBTAG00000011215	ACTN4	novel.circ.001323	551-602	-	83.19	4.02	1	PF00435,PF00307,PF08726,PF11971	8	-	0	0.666667
A0JN52	ENSBTAG00000010627	SF3B3	novel.circ.001243	101-152	-	82.93	4	1	PF10433,PF03178	2	-	0	0.666667
Q2KJJ0	ENSBTAG00000011656	PRPF6	novel.circ.000011	51-102	-	82.41	4.93	1	PF06424,PF14559	2	-	0	0.666667
Q08DF4	ENSBTAG00000011307	DNM1	novel.circ.002840	222-273	-	82.33	4.92	1	PF01031,PF00350,PF02212,PF00169	4	-	0	0.666667
Q2KJJ0	ENSBTAG00000011656	PRPF6	novel.circ.002538	287-12	back-splicing_junction	81.73	4.88	1	PF06424,PF14559	2	-	0	0.666667
Q08DF4	ENSBTAG00000011307	DNM1	novel.circ.001771	156-207	-	81.5	4.87	1	PF01031,PF00350,PF02212,PF00169	4	-	0	0.666667
A0JN52	ENSBTAG00000010627	SF3B3	novel.circ.002217	151-202	-	80.97	4.83	1	PF10433,PF03178	2	-	0	0.666667
Q863B3	ENSBTAG00000010692	SND1	novel.circ.002764	178-229	-	80.79	4.09	1	PF00565,PF00567	6	-	0	0.666667
Q08DF4	ENSBTAG00000011307	DNM1	novel.circ.001459	326-377	-	80.29	4.06	1	PF01031,PF00350,PF02212,PF00169	4	-	0	0.666667
A0JN52	ENSBTAG00000010627	SF3B3	novel.circ.001853	133-184	-	80.01	4.21	1	PF10433,PF03178	2	-	0	0.666667
A0JN52	ENSBTAG00000010627	SF3B3	novel.circ.002764	178-229	-	80.01	4.05	1	PF10433,PF03178	2	-	0	0.666667
Q863B3	ENSBTAG00000010692	SND1	novel.circ.001853	133-184	-	79.45	4.17	1	PF00565,PF00567	6	-	0	0.666667
A0JN52	ENSBTAG00000010627	SF3B3	novel.circ.000246	101-152	-	77.99	4.08	1	PF10433,PF03178	2	-	0	0.666667
A5D7D1	ENSBTAG00000011215	ACTN4	novel.circ.002187	220-271	-	77.96	4.08	1	PF00435,PF00307,PF08726,PF11971	8	-	0	0.666667
A5D7D1	ENSBTAG00000011215	ACTN4	novel.circ.001469	1-52	-	77.75	4.61	1	PF00435,PF00307,PF08726,PF11971	8	-	0	0.666667
A0JN52	ENSBTAG00000010627	SF3B3	novel.circ.003020	209-260	-	77.51	4.05	1	PF10433,PF03178	2	-	0	0.666667
A0JN52	ENSBTAG00000010627	SF3B3	novel.circ.000696	176-227	-	77.33	4.04	1	PF10433,PF03178	2	-	0	0.666667
Q863B3	ENSBTAG00000010692	SND1	novel.circ.003020	209-260	-	77.32	4.04	1	PF00565,PF00567	6	-	0	0.666667
Q3ZCH0	ENSBTAG00000011419	HSPA9	novel.circ.002511	26-77	-	77.23	4.04	1	PF00012,PF06723,PF02782	3	-	0	0.666667
Q3ZCH0	ENSBTAG00000011419	HSPA9	novel.circ.002840	222-273	-	75.59	4.47	1	PF00012,PF06723,PF02782	3	-	0	0.666667
Q08DF4	ENSBTAG00000011307	DNM1	novel.circ.001469	1-52	-	75.17	4.44	1	PF01031,PF00350,PF02212,PF00169	4	-	0	0.666667
A5D7D1	ENSBTAG00000011215	ACTN4	novel.circ.002217	151-202	-	74.08	4.36	1	PF00435,PF00307,PF08726,PF11971	8	-	0	0.666667
Q3ZCH0	ENSBTAG00000011419	HSPA9	novel.circ.001771	156-207	-	73.74	4.34	1	PF00012,PF06723,PF02782	3	-	0	0.666667
A0JN52	ENSBTAG00000010627	SF3B3	novel.circ.002631	211-262	-	73.54	4.33	1	PF10433,PF03178	2	-	0	0.666667
Q2KJJ0	ENSBTAG00000011656	PRPF6	novel.circ.002840	222-273	-	73.02	4.29	1	PF06424,PF14559	2	-	0	0.666667
A0JN52	ENSBTAG00000010627	SF3B3	novel.circ.001068	76-127	-	72.68	4.27	1	PF10433,PF03178	2	-	0	0.666667
Q08DF4	ENSBTAG00000011307	DNM1	novel.circ.002217	151-202	-	72.21	4.24	1	PF01031,PF00350,PF02212,PF00169	4	-	0	0.666667
Q2KJJ0	ENSBTAG00000011656	PRPF6	novel.circ.001771	156-207	-	72.14	4.23	1	PF06424,PF14559	2	-	0	0.666667
Q863B3	ENSBTAG00000010692	SND1	novel.circ.001068	76-127	-	71.51	4.19	1	PF00565,PF00567	6	-	0	0.666667
A0JN52	ENSBTAG00000010627	SF3B3	novel.circ.000157	136-12	back-splicing_junction	68.68	4.17	1	PF10433,PF03178	2	-	0	0.666667
Q863B3	ENSBTAG00000010692	SND1	novel.circ.000157	136-12	back-splicing_junction	68.67	4.17	1	PF00565,PF00567	6	-	0	0.666667
Q0P5H2	ENSBTAG00000047679	DNTTIP2	novel.circ.003863	315-366	-	106.87	5.04	1	PF08698	1	-	0	0.666667
Q0P5H2	ENSBTAG00000047679	DNTTIP2	novel.circ.000847	609-662	-	98.24	4.56	1	PF08698	1	-	0	0.666667
Q0P5H2	ENSBTAG00000047679	DNTTIP2	novel.circ.000011	51-102	-	93.95	5.72	1	PF08698	1	-	0	0.666667
Q0P5H2	ENSBTAG00000047679	DNTTIP2	novel.circ.002538	287-12	back-splicing_junction	92.72	5.63	1	PF08698	1	-	0	0.666667
Q0P5H2	ENSBTAG00000047679	DNTTIP2	novel.circ.000493	1109-1160	-	91.03	4.15	1	PF08698	1	-	0	0.666667
Q0P5H2	ENSBTAG00000047679	DNTTIP2	novel.circ.004067	971-37	back-splicing_junction	90	4.21	1	PF08698	1	-	0	0.666667
Q0P5H2	ENSBTAG00000047679	DNTTIP2	novel.circ.003627	726-777	-	89.22	4.17	1	PF08698	1	-	0	0.666667
Q0P5H2	ENSBTAG00000047679	DNTTIP2	novel.circ.002511	26-77	-	84.78	4.5	1	PF08698	1	-	0	0.666667
Q0P5H2	ENSBTAG00000047679	DNTTIP2	novel.circ.002840	222-273	-	83.47	5	1	PF08698	1	-	0	0.666667
Q0P5H2	ENSBTAG00000047679	DNTTIP2	novel.circ.001771	156-207	-	82.46	4.93	1	PF08698	1	-	0	0.666667
Q0P5H2	ENSBTAG00000047679	DNTTIP2	novel.circ.001459	326-377	-	81.11	4.11	1	PF08698	1	-	0	0.666667
Q0P5H2	ENSBTAG00000047679	DNTTIP2	novel.circ.002187	220-271	-	76.68	4	1	PF08698	1	-	0	0.666667
Q0P5H2	ENSBTAG00000047679	DNTTIP2	novel.circ.001469	1-52	-	75.64	4.47	1	PF08698	1	-	0	0.666667
Q0P5H2	ENSBTAG00000047679	DNTTIP2	novel.circ.002217	151-202	-	72.67	4.27	1	PF08698	1	-	0	0.666667
Q76I82	ENSBTAG00000020733	RPS15A	novel.circ.001086	158-209	-	70.96	4.15	1	PF00410	1	-	0	0.666667
Q2KIV0	ENSBTAG00000051118	NOL12	novel.circ.003024	101-152	-	13.51	0	1	PF09805	1	Q9UGY1|NOL12|HepG2.NOL12.9.52|31226278|eCLIP_ENCODE	1	0.666667
A5PJS6	ENSBTAG00000009446	USP10	novel.circ.000011	51-102	-	68.73	4	1	PF00443,PF13423,PF07145	3	-	0	0.666625
Q0V8H6	ENSBTAG00000014297	MOV10	novel.circ.000720	476-527	-	86.21	4	1	PF13087,PF13086,PF13604,PF13245,PF04851	6	-	0	0.666625
A5PK42	ENSBTAG00000013698	ODAD4	novel.circ.001469	1-52	-	68.72	4	1	PF17874	1	-	0	0.666583
A7Z019	ENSBTAG00000019220	SMARCA4	novel.circ.003020	209-260	-	76.64	4	1	PF00176,PF00271,PF00439,PF14619,PF07529,PF07533,PF08880,PF04851	8	-	0	0.666583
Q2KJC1	ENSBTAG00000020012	CDC5L	novel.circ.000980	407-37	back-splicing_junction	76.63	4	1	PF11831,PF00249,PF13921	5	-	0	0.666583
A7MBJ5	ENSBTAG00000009939	CAND1	novel.circ.001459	326-377	-	79.21	4	1	PF08623	1	-	0	0.666542
Q3ZBV8	ENSBTAG00000014261	TARS1	novel.circ.000157	136-12	back-splicing_junction	66.23	4	1	PF00587,PF03129,PF02824,PF07973	4	-	0	0.666542
A2VE21	ENSBTAG00000017245	COPG2	novel.circ.003020	209-260	-	76.62	4	1	PF01602,PF08752,PF16381,PF13646	4	-	0	0.666542
Q3MHH4	ENSBTAG00000018928	QARS1	novel.circ.002217	151-202	-	68.71	4	1	PF00749,PF04558,PF03950,PF04557	4	-	0	0.666542
Q1RMR4	ENSBTAG00000003474	RAB15	novel.circ.001086	158-209	-	68.66	3.99	1	PF00071,PF08477,PF00025,PF01926,PF04670	5	-	0	0.666417
A7Z019	ENSBTAG00000019220	SMARCA4	novel.circ.003262	276-327	-	76.58	3.99	1	PF00176,PF00271,PF00439,PF14619,PF07529,PF07533,PF08880,PF04851	8	-	0	0.666417
P63103	ENSBTAG00000000236	YWHAZ	novel.circ.001043	12315-12840	-	111.03	-0.01	1	PF00244	1	P61981|YWHAG|K562.YWHAG.1.41|31226278|eCLIP_ENCODE	1	0.666333
A2VDL6	ENSBTAG00000010551	ATP1A2	novel.circ.003199	1001-1052	-	86.08	3.99	1	PF00122,PF00689,PF13246,PF00702,PF00690	5	-	0	0.666292
Q17QZ7	ENSBTAG00000033010	TTC27	novel.circ.000246	101-152	-	76.51	3.99	1	-	0	-	0	0.66625
A7Z019	ENSBTAG00000019220	SMARCA4	novel.circ.001344	1027-1082	-	88.14	3.99	1	PF00176,PF00271,PF00439,PF14619,PF07529,PF07533,PF08880,PF04851	8	-	0	0.66625
A2VDN6	ENSBTAG00000003390	SF3A1	novel.circ.002511	26-77	-	76.49	3.99	1	PF12230,PF01805,PF00240	4	-	0	0.666208
Q05B79	ENSBTAG00000006142	DHX36	novel.circ.001853	133-184	-	76.5	3.99	1	PF04408,PF07717,PF00271,PF00270	4	-	0	0.666208
Q17QZ7	ENSBTAG00000033010	TTC27	novel.circ.001945	151-202	-	88.4	3.99	1	-	0	-	0	0.666208
A2VE21	ENSBTAG00000017245	COPG2	novel.circ.003355	308-359	-	88.13	3.99	1	PF01602,PF08752,PF16381,PF13646	4	-	0	0.666208
Q863B3	ENSBTAG00000010692	SND1	novel.circ.001267	176-227	-	76.49	3.99	1	PF00565,PF00567	6	-	0	0.666208
Q08DA1	ENSBTAG00000001246	ATP1A1	novel.circ.000408	830-12	back-splicing_junction	83.92	3.99	1	PF00122,PF00689,PF13246,PF00702,PF00690	6	-	0	0.666167
Q08DA1	ENSBTAG00000001246	ATP1A1	novel.circ.000980	407-37	back-splicing_junction	76.48	3.99	1	PF00122,PF00689,PF13246,PF00702,PF00690	6	-	0	0.666167
Q0V8H6	ENSBTAG00000014297	MOV10	novel.circ.003156	465-516	-	82.67	3.99	1	PF13087,PF13086,PF13604,PF13245,PF04851	6	-	0	0.666167
E1BB52	ENSBTAG00000001528	CDK13	novel.circ.002217	151-202	-	68.55	3.99	1	PF00069,PF07714	2	-	0	0.666083
Q3MHH4	ENSBTAG00000018928	QARS1	novel.circ.003627	726-777	-	85.99	3.99	1	PF00749,PF04558,PF03950,PF04557	4	-	0	0.666083
Q3T0Q6	ENSBTAG00000012159	CNBP	novel.circ.004320	1111-1172	-	18.29	-0.01	1	PF00098	7	P62633|CNBP||NA|NA	1	0.666083
Q3ZC55	ENSBTAG00000009696	ACTN2	novel.circ.000224	522-12	back-splicing_junction	78.95	3.98	1	PF00435,PF00307,PF08726,PF11971	8	-	0	0.665875
Q17QZ7	ENSBTAG00000033010	TTC27	novel.circ.001267	176-227	-	76.37	3.98	1	-	0	-	0	0.665875
Q0V8H6	ENSBTAG00000014297	MOV10	novel.circ.003292	276-327	-	76.36	3.98	1	PF13087,PF13086,PF13604,PF13245,PF04851	6	-	0	0.665875
A0JN52	ENSBTAG00000010627	SF3B3	novel.circ.002459	270-321	-	76.37	3.98	1	PF10433,PF03178	2	-	0	0.665875
Q08DA1	ENSBTAG00000001246	ATP1A1	novel.circ.001482	268-37	back-splicing_junction	68.46	3.98	1	PF00122,PF00689,PF13246,PF00702,PF00690	6	-	0	0.665833
F1MJM0	ENSBTAG00000019133	ZNF326	novel.circ.003111	426-477	-	13.16	-0.02	1	PF04988	1	Q5BKZ1|ZNF326|450|31724725|RBNS_ENCODE	1	0.665792
A7Z061	ENSBTAG00000002726	CDC27	novel.circ.003627	726-777	-	85.84	3.98	1	PF00515,PF12895,PF07719,PF13181,PF13414,PF13432	7	-	0	0.66575
P41541	ENSBTAG00000017028	USO1	novel.circ.000157	136-12	back-splicing_junction	65.95	3.98	1	PF04869,PF18770,PF04871	3	-	0	0.66575
A6QQR4	ENSBTAG00000005607	ERCC6L	novel.circ.003627	726-777	-	85.79	3.98	1	PF00176,PF00271,PF04851	3	-	0	0.665625
Q5E9J1	ENSBTAG00000008853	HNRNPF	novel.circ.001267	1-52	-	11.94	-0.02	1	PF00076,PF08080	3	P52597|HNRNPF|gugkau|22574288|RBPMap,P52597|HNRNPF|815|19506027|SpliceAid-F,P52597|HNRNPF|1331|12612063|AEDB,P52597|HNRNPF|817|12612063|SpliceAid-F,P52597|HNRNPF|836|NA|NA	1	0.665625
Q2KIV0	ENSBTAG00000051118	NOL12	novel.circ.000987	531-582	-	16.28	-0.02	1	PF09805	1	Q9UGY1|NOL12|HepG2.NOL12.2.48|31226278|eCLIP_ENCODE	1	0.665625
A2VDN6	ENSBTAG00000003390	SF3A1	novel.circ.001469	1-52	-	68.37	3.97	1	PF12230,PF01805,PF00240	4	-	0	0.665583
Q05B79	ENSBTAG00000006142	DHX36	novel.circ.000408	830-12	back-splicing_junction	83.66	3.97	1	PF04408,PF07717,PF00271,PF00270	4	-	0	0.665542
Q2KIR1	ENSBTAG00000009077	SNRPA	novel.circ.000876	276-327	-	13.06	-0.03	1	PF00076	2	P09012|SNRPA|M348_0.6|10094314|cisBP-RNA,P09012|SNRPA|M347_0.6|10094314|cisBP-RNA	1	0.665542
Q17R09	ENSBTAG00000013265	DHX38	novel.circ.001853	133-184	-	76.21	3.97	1	PF04408,PF07717,PF00271,PF00270	4	-	0	0.665458
Q95M18	ENSBTAG00000003362	HSP90B1	novel.circ.003014	51-102	-	68.3	3.97	1	PF00183,PF02518,PF13589	3	-	0	0.665375
A4IF63	ENSBTAG00000008816	TRIM2	novel.circ.001459	326-377	-	78.75	3.97	1	PF01436,PF17170,PF00630,PF00643,PF13445,PF13923,PF00097,PF13920,PF14634,PF13639	15	-	0	0.665375
Q17QZ7	ENSBTAG00000033010	TTC27	novel.circ.000597	1043-1094	-	87.78	3.97	1	-	0	-	0	0.665375
Q0V8H6	ENSBTAG00000014297	MOV10	novel.circ.004338	251-302	-	76.16	3.97	1	PF13087,PF13086,PF13604,PF13245,PF04851	6	-	0	0.665333
Q29RK2	ENSBTAG00000019700	PC	novel.circ.001469	1-52	-	68.28	3.97	1	PF02786,PF02436,PF00289,PF02785,PF00682,PF00364,PF07478	7	-	0	0.665333
Q3SYU1	ENSBTAG00000016528	NOC2L	novel.circ.003863	315-366	-	87.72	3.97	1	PF03715	1	-	0	0.66525
A2VDL6	ENSBTAG00000010551	ATP1A2	novel.circ.003014	51-102	-	68.24	3.96	1	PF00122,PF00689,PF13246,PF00702,PF00690	5	-	0	0.665208
Q2T9U5	ENSBTAG00000006449	REXO5	novel.circ.001771	156-207	-	68.22	3.96	1	PF00076,PF00929	2	-	0	0.665167
Q0V8H6	ENSBTAG00000014297	MOV10	novel.circ.000685	1887-57	back-splicing_junction	90.76	3.96	1	PF13087,PF13086,PF13604,PF13245,PF04851	6	-	0	0.665167
Q29RK2	ENSBTAG00000019700	PC	novel.circ.002511	26-77	-	76.07	3.96	1	PF02786,PF02436,PF00289,PF02785,PF00682,PF00364,PF07478	7	-	0	0.665125
A6QQR4	ENSBTAG00000005607	ERCC6L	novel.circ.000493	1109-1160	-	87.65	3.96	1	PF00176,PF00271,PF04851	3	-	0	0.665083
Q05B79	ENSBTAG00000006142	DHX36	novel.circ.000246	101-152	-	76.06	3.96	1	PF04408,PF07717,PF00271,PF00270	4	-	0	0.665083
Q3ZBJ1	ENSBTAG00000008873	NCBP2	novel.circ.002440	26-77	-	11.74	-0.04	1	PF00076	1	P52298|NCBP2|HepG2.NCBP2.5.83|31226278|eCLIP_ENCODE	1	0.665083
Q3ZC55	ENSBTAG00000009696	ACTN2	novel.circ.003199	1001-1052	-	85.56	3.96	1	PF00435,PF00307,PF08726,PF11971	8	-	0	0.665083
Q28141	ENSBTAG00000019821	DHX9	novel.circ.003951	793-844	-	83.48	3.96	1	PF00035,PF00271,PF04408,PF07717,PF00270	6	-	0	0.665083
Q08DA1	ENSBTAG00000001246	ATP1A1	novel.circ.002459	270-321	-	76.04	3.96	1	PF00122,PF00689,PF13246,PF00702,PF00690	6	-	0	0.665042
A2VE21	ENSBTAG00000017245	COPG2	novel.circ.000246	101-152	-	76.05	3.96	1	PF01602,PF08752,PF16381,PF13646	4	-	0	0.665042
Q1JQD2	ENSBTAG00000000080	GRWD1	novel.circ.002440	26-77	-	11.7	-0.04	1	PF00400,PF12265	3	Q9BQ67|GRWD1|HepG2.GRWD1.6.332|31226278|eCLIP_ENCODE,Q9BQ67|GRWD1|HepG2.GRWD1.2.313|31226278|eCLIP_ENCODE	1	0.665
A2VDP1	ENSBTAG00000009516	RNF20	novel.circ.000224	522-12	back-splicing_junction	78.61	3.96	1	PF13920,PF00097	2	-	0	0.665
Q5E9J1	ENSBTAG00000008853	HNRNPF	novel.circ.003111	426-477	-	12.83	-0.04	1	PF00076,PF08080	3	P52597|HNRNPF|gugkau|22574288|RBPMap,P52597|HNRNPF|815|19506027|SpliceAid-F,P52597|HNRNPF|1331|12612063|AEDB,P52597|HNRNPF|817|12612063|SpliceAid-F,P52597|HNRNPF|836|NA|NA	1	0.664958
A2VE39	ENSBTAG00000017091	CMTR1	novel.circ.000157	136-12	back-splicing_junction	65.67	3.96	1	PF01728,PF01585	2	-	0	0.664958
Q863B3	ENSBTAG00000010692	SND1	novel.circ.000696	176-227	-	76.01	3.96	1	PF00565,PF00567	6	-	0	0.664958
E1BB52	ENSBTAG00000001528	CDK13	novel.circ.004067	971-37	back-splicing_junction	85.5	3.96	1	PF00069,PF07714	2	-	0	0.664917
Q17R09	ENSBTAG00000013265	DHX38	novel.circ.000157	136-12	back-splicing_junction	65.65	3.96	1	PF04408,PF07717,PF00271,PF00270	4	-	0	0.664875
Q5E9J1	ENSBTAG00000008853	HNRNPF	novel.circ.002533	219-270	-	9.39	-0.04	1	PF00076,PF08080	3	P52597|HNRNPF|gugkau|22574288|RBPMap,P52597|HNRNPF|815|19506027|SpliceAid-F,P52597|HNRNPF|1331|12612063|AEDB,P52597|HNRNPF|817|12612063|SpliceAid-F,P52597|HNRNPF|836|NA|NA	1	0.664833
Q3ZBK7	ENSBTAG00000030566	GLE1	novel.circ.002217	151-202	-	68.1	3.96	1	PF07817	1	-	0	0.664833
Q3T0Q8	ENSBTAG00000013671	UTP14A	novel.circ.002187	220-271	-	75.96	3.96	1	PF04615	1	-	0	0.664833
Q32S26	ENSBTAG00000011074	BRD2	novel.circ.000011	51-102	-	68.08	3.95	1	PF00439,PF17035	3	-	0	0.66475
Q17QZ7	ENSBTAG00000033010	TTC27	novel.circ.000696	176-227	-	75.92	3.95	1	-	0	-	0	0.664708
A2VE21	ENSBTAG00000017245	COPG2	novel.circ.001945	151-202	-	87.74	3.95	1	PF01602,PF08752,PF16381,PF13646	4	-	0	0.664667
Q3SZR8	ENSBTAG00000040006	SRSF3	novel.circ.001068	251-302	-	9.33	-0.05	1	PF00076	1	P84103|SRSF3|s41|10094314|SpliceAid-F,P84103|SRSF3|1249|17036044|SpliceAid-F,P84103|SRSF3|1251|17036044|SpliceAid-F,P84103|SRSF3|starBase_1|26876937|PAR-CLIP,P84103|SRSF3|NA|NA|NA	1	0.664667
Q3ZBJ1	ENSBTAG00000008873	NCBP2	novel.circ.003284	939-990	-	15.13	-0.05	1	PF00076	1	P52298|NCBP2|HepG2.NCBP2.5.83|31226278|eCLIP_ENCODE	1	0.664625
A2VDL6	ENSBTAG00000010551	ATP1A2	novel.circ.001049	101-152	-	78.45	3.95	1	PF00122,PF00689,PF13246,PF00702,PF00690	5	-	0	0.664625
Q2KJC1	ENSBTAG00000020012	CDC5L	novel.circ.000224	522-12	back-splicing_junction	78.46	3.95	1	PF11831,PF00249,PF13921	5	-	0	0.664625
Q08DF4	ENSBTAG00000011307	DNM1	novel.circ.002187	220-271	-	75.88	3.95	1	PF01031,PF00350,PF02212,PF00169	4	-	0	0.664625
A5D7D1	ENSBTAG00000011215	ACTN4	novel.circ.002631	211-262	-	68.03	3.95	1	PF00435,PF00307,PF08726,PF11971	8	-	0	0.664625
A6QLE1	ENSBTAG00000003719	TDRD7	novel.circ.003863	315-366	-	87.44	3.95	1	PF00567,PF12872	4	-	0	0.664583
A1A4H6	ENSBTAG00000006671	DDX27	novel.circ.001771	156-207	-	68.01	3.95	1	PF00270,PF00271,PF04851	3	-	0	0.664583
[truncated: 44,618 more rows]
