# Supplementary material for: Identification and functional analysis of circular RNAs during mitochondrial damage induced by infectious bovine rhinotracheitis virus infection in Madin–Darby bovine kidney cells
Source: Research Square preprint supplement (doi:10.21203/rs.3.rs-6754910/v1), 2025-06-20
Supplement: Supplementary file 2 [file 20e451e20d1983d898f9c009.xlsx]

## Sheet: Table S15
Table S15：Target genes of 59 negatively correlated miRNAs
miRNA	target	Gene	target_start	target_end	energy(kcal/mol)	target_region(3'->5')	mirna-target_pairing(5'->3')	miRNA_sequence(5'->3')	Symbol
bta-miR-148a	ENSBTAT00000000016	ENSBTAG00000000013	1854	1875	-14.23	aGTCACGTacaaagatccctac	x|||||||xxxxxxxxxxxxxx	tCAGTGCActacagaactttgt	PRKAA1
bta-miR-144	ENSBTAT00000000016	ENSBTAG00000000013	830	852	-17.45	aTGTCATATACGTTACGTCGAga	x||||||||xx::|||:|x||xx	tACAGTATAGATGATGTA-CTag	PRKAA1
bta-miR-152	ENSBTAT00000000016	ENSBTAG00000000013	1854	1875	-22.63	aGTCACGTACaaagatccctac	x|||||||||xxxxxxxxxxxx	tCAGTGCATGacagaacttggg	PRKAA1
bta-miR-769	ENSBTAT00000000016	ENSBTAG00000000013	233	253	-15.92	tCTCTGGATATT-AAGtaacgc	x|||||||xx::x|||xxxxxx	tGAGACCTCCGGGTTCtgagct	PRKAA1
bta-miR-497	ENSBTAT00000000014	ENSBTAG00000000014	354	375	-14.52	gTCGTCGTtctttctttttacg	x|||||||xxxxxxxxxxxxxx	cAGCAGCAcactgtggtttgta	TXN2
bta-miR-1291	ENSBTAT00000000014	ENSBTAG00000000014	253	277	-26.33	aCCGGGACCCGAGACAGGGTCGTag	x|||||||xx:xxx|x||:x|||xx	tGGCCCTGACTGAAGACCT-GCAgt	TXN2
bta-miR-31	ENSBTAT00000087235	ENSBTAG00000000019	147	169	-13.1	aCCGTTCTGATGTTACTTATTtt	x|||||||x|:|x:x|x|||:xx	aGGCAAGA-TGCTG-GCATAGct	SERINC1
bta-miR-182	ENSBTAT00000087235	ENSBTAG00000000019	148	171	-11.54	gAACCGTTCTGATGTTacttattt	x|||||||x:x||x||xxxxxxxx	tTTGGCAATGGTAGAActcacact	SERINC1
bta-miR-2370-5p	ENSBTAT00000087235	ENSBTAG00000000019	470	494	-13.18	tCCCTTTTTAGACTTTTCAAAAAtc	x|||||||xxx|||||:x|xx||xx	tGGGAAAA---TGAAAGTTGGTTat	SERINC1
bta-miR-6119-3p	ENSBTAT00000087235	ENSBTAG00000000019	731	753	-12.7	gGTTTAGTAAGtctcaaggattg	x|||||||||:xxxxxxxxxxxx	gCAAATCATTTtttactctccaa	SERINC1
bta-miR-146b	ENSBTAT00000000022	ENSBTAG00000000021	709	733	-17.34	cCTCTTGACAGGAGTTGATTTccca	x||||||||xx:||x|x||::xxxx	tGAGAACTGAATTCCA-TAGGctgt	WASHC3
bta-miR-196a	ENSBTAT00000000022	ENSBTAG00000000021	868	889	-14.13	gTCCATCACCTGT-CAAgtggag	x|||||||xxx||x|||xxxxxx	tAGGTAGTTT-CATGTTgttggg	WASHC3
bta-miR-144	ENSBTAT00000000024	ENSBTAG00000000022	71	94	-17.04	aTGTCATATATAAACTATATtttt	x||||||||x||xx|||:||xxxx	tACAGTATAGAT--GATGTActag	NUP37
bta-miR-2370-5p	ENSBTAT00000000025	ENSBTAG00000000023	140	160	-11.51	cCCCTTTT-CTaagattatcac	x|||||||x||xxxxxxxxxxx	tGGGAAAATGAaagttggttat	RNF2
bta-miR-497	ENSBTAT00000000027	ENSBTAG00000000025	2069	2089	-15.98	tTCGTCGTATTG-ACCAAtgac	x|||||||x|x:x|||||xxxx	cAGCAGCACACTGTGGTTtgta	RAB6A
bta-miR-2370-5p	ENSBTAT00000000027	ENSBTAG00000000025	80	103	-12.56	tCCCTTTTCCAAGTTCGGTTAtaa	x|||||||x|xxx|||::::|xxx	tGGGAAAATGA--AAGTTGGTtat	RAB6A
bta-miR-2370-5p	ENSBTAT00000082349	ENSBTAG00000000025	80	103	-12.56	tCCCTTTTCCAAGTTCGGTTAtaa	x|||||||x|xxx|||::::|xxx	tGGGAAAATGA--AAGTTGGTtat	RAB6A
bta-miR-11991	ENSBTAT00000000027	ENSBTAG00000000025	2745	2763	-17.78	gACAAGACG--GGACTGAagt	x|||||||:xx|:|||:|xxx	aTGTTCTGTATCTTGATTgta	RAB6A
bta-miR-671	ENSBTAT00000000033	ENSBTAG00000000030	23	45	-31.35	tCCTTCGGGGTCTCCggttcgta	x||||||||::||||xxxxxxxx	aGGAAGCCCTGGAGGggctggag	RDM1
bta-miR-1291	ENSBTAT00000000033	ENSBTAG00000000030	81	108	-27.57	aCCGGGACCTGCGACTGTCGGGTCccca	x|||||||x||xx|||x||x||x|xxxx	tGGCCCTG-AC--TGA-AGACCTGcagt	RDM1
bta-miR-1291	ENSBTAT00000000034	ENSBTAG00000000031	382	406	-25.39	gCCGGGACGTGGACCCTAGGCcagg	x|||||||x||:xxx||x|:|xxxx	tGGCCCTG-ACTGAAGACCTGcagt	TRPV4
bta-miR-148a	ENSBTAT00000000043	ENSBTAG00000000039	475	493	-12.1	tGTCACGTC---TCTGCAAAtt	x|||||||xxxx|||xx|||xx	tCAGTGCACTACAGAACTTTgt	SIRT7
bta-miR-106a	ENSBTAT00000000043	ENSBTAG00000000039	17	38	-11.48	gTTTCACGGTAGTAACaggaac	x|||||||:xx||x||xxxxxx	aAAAGTGCTTACAGTGcaggta	SIRT7
bta-miR-152	ENSBTAT00000000043	ENSBTAG00000000039	471	493	-15.28	tGTCACGTCTCTGcaaattattg	x|||||||xx|||xxxxxxxxxx	tCAGTGCAT-GACagaacttggg	SIRT7
bta-miR-2431-3p	ENSBTAT00000000043	ENSBTAG00000000039	95	116	-17.4	gTGGGGGTCTAT-TAagagtccc	x|||||||xx|:x||xxxxxxxx	cACCCCCACTTGCATgaccctga	SIRT7
bta-miR-6119-5p	ENSBTAT00000000043	ENSBTAG00000000039	307	327	-10.76	aCTCCATTCCGT--CGAAACacg	x|||||||xxx|xx|x||||xxx	aGAGGTAAAAAATTGATTTGact	SIRT7
bta-miR-10a	ENSBTAT00000000046	ENSBTAG00000000042	72	94	-17.26	gTGGGACACATCGGaccccgatc	x|||||||xx|x||xxxxxxxxx	tACCCTGTAGATCCgaatttgtg	PYCR1
bta-miR-10a	ENSBTAT00000075415	ENSBTAG00000000042	72	94	-17.26	gTGGGACACATCGGaccccgatc	x|||||||xx|x||xxxxxxxxx	tACCCTGTAGATCCgaatttgtg	PYCR1
bta-miR-10a	ENSBTAT00000079922	ENSBTAG00000000042	72	94	-17.26	gTGGGACACATCGGaccccgatc	x|||||||xx|x||xxxxxxxxx	tACCCTGTAGATCCgaatttgtg	PYCR1
bta-miR-10b	ENSBTAT00000000046	ENSBTAG00000000042	72	94	-17.26	gTGGGACACATCGGaccccgatc	x|||||||xx|x||xxxxxxxxx	tACCCTGTAGAACCgaatttgtg	PYCR1
bta-miR-10b	ENSBTAT00000075415	ENSBTAG00000000042	72	94	-17.26	gTGGGACACATCGGaccccgatc	x|||||||xx|x||xxxxxxxxx	tACCCTGTAGAACCgaatttgtg	PYCR1
bta-miR-10b	ENSBTAT00000079922	ENSBTAG00000000042	72	94	-17.26	gTGGGACACATCGGaccccgatc	x|||||||xx|x||xxxxxxxxx	tACCCTGTAGAACCgaatttgtg	PYCR1
bta-miR-143	ENSBTAT00000000046	ENSBTAG00000000042	551	571	-11.3	cCTCTACTACCGCAC-TCacaa	x|||||||x|xxx||x||xxxx	tGAGATGAAGCACTGTAGctcg	PYCR1
bta-miR-143	ENSBTAT00000075415	ENSBTAG00000000042	551	571	-11.3	cCTCTACTACCGCAC-TCacaa	x|||||||x|xxx||x||xxxx	tGAGATGAAGCACTGTAGctcg	PYCR1
bta-miR-143	ENSBTAT00000079922	ENSBTAG00000000042	551	571	-11.3	cCTCTACTACCGCAC-TCacaa	x|||||||x|xxx||x||xxxx	tGAGATGAAGCACTGTAGctcg	PYCR1
bta-miR-6121-3p	ENSBTAT00000000046	ENSBTAG00000000042	234	256	-25.13	tGCCTACTTAGTCCTCCGACTcc	x|||||||x|xx|||xx||||xx	cCGGATGA-T--GGACACTGAgg	PYCR1
bta-miR-6121-3p	ENSBTAT00000075415	ENSBTAG00000000042	234	256	-25.13	tGCCTACTTAGTCCTCCGACTcc	x|||||||x|xx|||xx||||xx	cCGGATGA-T--GGACACTGAgg	PYCR1
bta-miR-6121-3p	ENSBTAT00000079922	ENSBTAG00000000042	234	256	-25.13	tGCCTACTTAGTCCTCCGACTcc	x|||||||x|xx|||xx||||xx	cCGGATGA-T--GGACACTGAgg	PYCR1
bta-miR-342	ENSBTAT00000000055	ENSBTAG00000000050	211	235	-17.66	aGAGTGTGTgcactccgagacctgg	x||||||||xxxxxxxxxxxxxxxx	tCTCACACAgaaatcgcacccatct	PSMG3
bta-miR-10a	ENSBTAT00000000061	ENSBTAG00000000056	468	491	-14.92	aTGGGACAGGAAGTCAATAATCcc	x|||||||xxx||x|xx|||x|xx	tACCCTGTAGATCCGA-ATTTGtg	STRADA
bta-miR-10a	ENSBTAT00000053961	ENSBTAG00000000056	468	491	-14.92	aTGGGACAGGAAGTCAATAATCcc	x|||||||xxx||x|xx|||x|xx	tACCCTGTAGATCCGA-ATTTGtg	STRADA
bta-miR-10b	ENSBTAT00000000061	ENSBTAG00000000056	469	491	-14.67	aTGGGACAggaagtcaataatcc	x|||||||xxxxxxxxxxxxxxx	tACCCTGTagaaccgaatttgtg	STRADA
bta-miR-10b	ENSBTAT00000053961	ENSBTAG00000000056	469	491	-14.67	aTGGGACAggaagtcaataatcc	x|||||||xxxxxxxxxxxxxxx	tACCCTGTagaaccgaatttgtg	STRADA
bta-miR-671	ENSBTAT00000000061	ENSBTAG00000000056	349	371	-22.77	cCCTTCGGTGTCgaggggtccgt	x|||||||x::|xxxxxxxxxxx	aGGAAGCCCTGGaggggctggag	STRADA
bta-miR-671	ENSBTAT00000053961	ENSBTAG00000000056	349	371	-22.77	cCCTTCGGTGTCgaggggtccgt	x|||||||x::|xxxxxxxxxxx	aGGAAGCCCTGGaggggctggag	STRADA
bta-miR-2431-3p	ENSBTAT00000000061	ENSBTAG00000000056	300	322	-22.59	tTGGGGGTGCCGGTCCGGtcctg	x||||||||xxx||x|x|xxxxx	cACCCCCACTTGCATGACcctga	STRADA
bta-miR-2431-3p	ENSBTAT00000053961	ENSBTAG00000000056	300	322	-22.59	tTGGGGGTGCCGGTCCGGtcctg	x||||||||xxx||x|x|xxxxx	cACCCCCACTTGCATGACcctga	STRADA
bta-miR-3432a	ENSBTAT00000000061	ENSBTAG00000000056	756	776	-19.37	cCGCCCTACTGGACA-CAggct	x|||||||xx::x||x||xxxx	tGCGGGATCTTTAGTTGTggtg	STRADA
bta-miR-3432a	ENSBTAT00000053961	ENSBTAG00000000056	756	776	-19.37	cCGCCCTACTGGACA-CAggct	x|||||||xx::x||x||xxxx	tGCGGGATCTTTAGTTGTggtg	STRADA
bta-miR-10162-5p	ENSBTAT00000000061	ENSBTAG00000000056	235	257	-13.28	tCCTGTCCCTTACaatctaaaga	x|||||||xx|x|xxxxxxxxxx	tGGACAGGCCAAGccgctgtgca	STRADA
bta-miR-10162-5p	ENSBTAT00000053961	ENSBTAG00000000056	235	257	-13.28	tCCTGTCCCTTACaatctaaaga	x|||||||xx|x|xxxxxxxxxx	tGGACAGGCCAAGccgctgtgca	STRADA
bta-miR-181c	ENSBTAT00000075153	ENSBTAG00000000061	191	214	-11.04	aTGTAAGTTtttagtagatgttga	x||||||||xxxxxxxxxxxxxxx	aACATTCAAcctgtcggtgagttt	PCDH7
bta-miR-320a	ENSBTAT00000000071	ENSBTAG00000000064	520	542	-13.45	gTTTCGACCATTAGTTTgggaac	x||||||||x:x|x|:|xxxxxx	aAAAGCTGG-GTTGAGAgggcga	FEN1
bta-let-7d	ENSBTAT00000000071	ENSBTAG00000000064	7	28	-16.36	tCTCCATCGcacttccctttgg	x|||||||:xxxxxxxxxxxxx	aGAGGTAGTaggttgcatagtt	FEN1
bta-let-7g	ENSBTAT00000000071	ENSBTAG00000000064	8	28	-12.92	tCTCCATCG-CActtccctttg	x|||||||:x||xxxxxxxxxx	tGAGGTAGTAGTttgtacagtt	FEN1
bta-let-7a-5p	ENSBTAT00000000071	ENSBTAG00000000064	7	28	-13.93	tCTCCATCGcacttccctttgg	x|||||||:xxxxxxxxxxxxx	tGAGGTAGTaggttgtatagtt	FEN1
bta-let-7b	ENSBTAT00000000071	ENSBTAG00000000064	7	28	-16.48	tCTCCATCGcacttccctttgg	x|||||||:xxxxxxxxxxxxx	tGAGGTAGTaggttgtgtggtt	FEN1
bta-let-7e	ENSBTAT00000000071	ENSBTAG00000000064	7	28	-13.59	tCTCCATCGCACTTCCCTTTgg	x|||||||x|x|:xx|x|x|xx	tGAGGTAG-GAGGTTGTATAgt	FEN1
bta-miR-497	ENSBTAT00000000071	ENSBTAG00000000064	377	396	-16.31	cTCGTCGTCAGAC--CAAGgtg	x|||||||xx|||xx|||:xxx	cAGCAGCACACTGTGGTTTgta	FEN1
bta-miR-196a	ENSBTAT00000000071	ENSBTAG00000000064	34	56	-20.58	gTCCATCACCGTTTGTAGGACcc	x|||||||xx||x::x|x:||xx	tAGGTAGTTTCATGT-TGTTGgg	FEN1
bta-miR-2370-5p	ENSBTAT00000000071	ENSBTAG00000000064	125	146	-13.56	aCCCTTTTCGTGATAACTcgtc	x|||||||xx|xx:|||:xxxx	tGGGAAAATGAAAGTTGGttat	FEN1
bta-miR-2431-3p	ENSBTAT00000000071	ENSBTAG00000000064	71	91	-18.93	gTGGGGGT--ACTTCCAAAGAgg	x|||||||xx||x|x|xxx||xx	cACCCCCACTTGCATGACCCTga	FEN1
bta-miR-1291	ENSBTAT00000000081	ENSBTAG00000000073	682	705	-25.5	gCCGGGACGGAACCCGGGAaccgg	x|||||||x||xxx|x|||xxxxx	tGGCCCTGACTGAAGACCTgcagt	LRPAP1
bta-miR-1291	ENSBTAT00000077929	ENSBTAG00000000073	232	255	-23.66	tCCGGGACGGCCCAGTCCACGggg	x|||||||x|x|xxx|xx|||xxx	tGGCCCTGACTGAAGACCTGCagt	LRPAP1
bta-miR-10162-5p	ENSBTAT00000000081	ENSBTAG00000000073	910	933	-29.14	aCCTGTCCGCGGTCCGGGTCACtg	x||||||||x|x||x|x|x|||xx	tGGACAGGC-CAAGCCGCTGTGca	LRPAP1
bta-miR-320a	ENSBTAT00000079154	ENSBTAG00000000078	443	464	-10.12	aTTTCGACATAAaaacagtgta	x|||||||x:||xxxxxxxxxx	aAAAGCTGGGTTgagagggcga	GLIPR2
bta-miR-10a	ENSBTAT00000079154	ENSBTAG00000000078	484	506	-17.66	aTGGGACATAAAGCCTacctttg	x||||||||xx||x||xxxxxxx	tACCCTGTAGATCCGAatttgtg	GLIPR2
bta-miR-10b	ENSBTAT00000079154	ENSBTAG00000000078	484	506	-17.12	aTGGGACATAAAGCCTacctttg	x||||||||xxx|x||xxxxxxx	tACCCTGTAGAACCGAatttgtg	GLIPR2
bta-miR-497	ENSBTAT00000079154	ENSBTAG00000000078	970	995	-23.66	cTCGTCGTCGCGTCGACGTCAGtgtc	x|||||||xxx||x|||::||:xxxx	cAGCAGCA---CA-CTGTGGTTtgta	GLIPR2
bta-miR-143	ENSBTAT00000079154	ENSBTAG00000000078	1255	1278	-24.38	aCTCTACTTCCCGTGTCGTCttcg	x|||||||||xx|||x|:||xxxx	tGAGATGAAG--CACTGTAGctcg	GLIPR2
bta-miR-182	ENSBTAT00000079154	ENSBTAG00000000078	576	603	-16	aAACCGTTAGGGTGATCTCTTAAGGTcc	x||||||||xxx:x||||x|x|xx||xx	tTTGGCAAT---GGTAGA-ACTCACAct	GLIPR2
bta-miR-769	ENSBTAT00000079154	ENSBTAG00000000078	1220	1241	-20.38	tCTCTGGAAGTCCttcgtgcag	x|||||||x|:||xxxxxxxxx	tGAGACCTCCGGGttctgagct	GLIPR2
bta-miR-2332	ENSBTAT00000079154	ENSBTAG00000000078	410	434	-13.11	cCCAAATTATAAGAATTTATagatg	x|||||||x:|x|||::|x|xxxxx	cGGTTTAAGGT-CTTGGAGAcaaag	GLIPR2
bta-miR-10162-5p	ENSBTAT00000079154	ENSBTAG00000000078	69	90	-23.91	cCCTGTCCG-TGTGTCGACTCaa	x||||||||x|x:|x||||x|xx	tGGACAGGCCAAGCCGCTGTGca	GLIPR2
bta-miR-1296	ENSBTAT00000000088	ENSBTAG00000000080	435	457	-19.04	gATCCCGGACGTCGActgtttta	x|||||||xx::|||xxxxxxxx	tTAGGGCCC-TGGCTccatctcc	GRWD1
bta-miR-2303	ENSBTAT00000000088	ENSBTAG00000000080	71	90	-18.13	aGACTTACT-CAGggaaggtc	x||||||||x|||xxxxxxxx	tCTGAATGATGTCgactgatg	GRWD1
bta-miR-497	ENSBTAT00000000092	ENSBTAG00000000081	537	563	-21.46	gTCGTCGTTGCTTAAGATACTAAtatg	x|||||||x|x|xxx||:||:||xxxx	cAGCAGCA-C-A---CTGTGGTTtgta	CERT1
bta-miR-497	ENSBTAT00000056797	ENSBTAG00000000081	537	563	-21.46	gTCGTCGTTGCTTAAGATACTAAtatg	x|||||||x|x|xxx||:||:||xxxx	cAGCAGCA-C-A---CTGTGGTTtgta	CERT1
bta-miR-3613a	ENSBTAT00000000092	ENSBTAG00000000081	825	846	-14.47	cCAACATGTCCACAAAGACAaa	x|||||||xxx|x|||:|||xx	tGTTGTACTTTTTTTTTTGTtc	CERT1
bta-miR-3613a	ENSBTAT00000056797	ENSBTAG00000000081	825	846	-14.47	cCAACATGTCCACAAAGACAaa	x|||||||xxx|x|||:|||xx	tGTTGTACTTTTTTTTTTGTtc	CERT1
bta-miR-148a	ENSBTAT00000000096	ENSBTAG00000000087	364	386	-17.27	aGTCACGTTTATGTTCTTAGtag	x|||||||xx||||:x|x|:xxx	tCAGTGCAC-TACAGAACTTtgt	HSD17B12
bta-miR-200a	ENSBTAT00000000096	ENSBTAG00000000087	1049	1069	-11.54	gTTGTGACTTA--ATTaaagaat	x|||||||xx|xx|||xxxxxxx	tAACACTGTCTGGTAAcgatgtt	HSD17B12
bta-miR-497	ENSBTAT00000000096	ENSBTAG00000000087	718	739	-21.82	aTCGTCGTGACCTTCCGGACgg	x||||||||xxx:x||::||xx	cAGCAGCACACTGTGGTTTGta	HSD17B12
bta-miR-152	ENSBTAT00000000096	ENSBTAG00000000087	969	990	-16.85	gGTCACGTTTTTACCGGAATta	x|||||||x:|xx|xx|||:xx	tCAGTGCATGACAGAACTTGgg	HSD17B12
bta-miR-148a	ENSBTAT00000000097	ENSBTAG00000000088	250	276	-18.16	aGTCACGTCTGTAAATGTCTTttttta	x|||||||xx|xxx|||||||xxxxxx	tCAGTGCA--C---TACAGAActttgt	ALCAM
bta-miR-148a	ENSBTAT00000071366	ENSBTAG00000000088	250	276	-18.16	aGTCACGTCTGTAAATGTCTTttttta	x|||||||xx|xxx|||||||xxxxxx	tCAGTGCA--C---TACAGAActttgt	ALCAM
bta-miR-181b	ENSBTAT00000000097	ENSBTAG00000000088	587	610	-10.11	gTGTAAGTGTCTTTATCAAgtaga	x|||||||:x|xx:|x|x|xxxxx	aACATTCATTGCTGTCGGTgggtt	ALCAM
bta-miR-181b	ENSBTAT00000071366	ENSBTAG00000000088	587	610	-10.11	gTGTAAGTGTCTTTATCAAgtaga	x|||||||:x|xx:|x|x|xxxxx	aACATTCATTGCTGTCGGTgggtt	ALCAM
bta-miR-181c	ENSBTAT00000000097	ENSBTAG00000000088	587	610	-10.7	gTGTAAGTgtctttatcaagtaga	x|||||||xxxxxxxxxxxxxxxx	aACATTCAacctgtcggtgagttt	ALCAM
bta-miR-181c	ENSBTAT00000071366	ENSBTAG00000000088	587	610	-10.7	gTGTAAGTgtctttatcaagtaga	x|||||||xxxxxxxxxxxxxxxx	aACATTCAacctgtcggtgagttt	ALCAM
bta-miR-192	ENSBTAT00000000097	ENSBTAG00000000088	210	233	-17.99	tACTGGATAGTAGTACCGACGGtt	x||||||||x|x:x||x|x|||xx	cTGACCTATGAAT-TGACAGCCag	ALCAM
bta-miR-192	ENSBTAT00000071366	ENSBTAG00000000088	210	233	-17.99	tACTGGATAGTAGTACCGACGGtt	x||||||||x|x:x||x|x|||xx	cTGACCTATGAAT-TGACAGCCag	ALCAM
bta-miR-152	ENSBTAT00000000097	ENSBTAG00000000088	256	276	-19.71	aGTCACGT-CTGTaaatgtctt	x|||||||x||||xxxxxxxxx	tCAGTGCATGACAgaacttggg	ALCAM
bta-miR-152	ENSBTAT00000071366	ENSBTAG00000000088	256	276	-19.71	aGTCACGT-CTGTaaatgtctt	x|||||||x||||xxxxxxxxx	tCAGTGCATGACAgaacttggg	ALCAM
bta-miR-31	ENSBTAT00000000101	ENSBTAG00000000092	105	127	-14.8	aCCGTTCTCAGGTCAGGTAattc	x|||||||xx|::|xx|||xxxx	aGGCAAGATGCTGG--CATagct	HIF1AN
bta-miR-2303	ENSBTAT00000000101	ENSBTAG00000000092	239	257	-13.97	tGACTTACGTC--CTGAaatc	x|||||||xx|xx||||xxxx	tCTGAATGATGTCGACTgatg	HIF1AN
bta-miR-148a	ENSBTAT00000000104	ENSBTAG00000000094	284	304	-12.72	tGTCACGT-ATATTaattcagt	x|||||||x||x|:xxxxxxxx	tCAGTGCACTACAGaactttgt	ATPAF1
bta-miR-148a	ENSBTAT00000070179	ENSBTAG00000000094	284	304	-12.72	tGTCACGT-ATATTaattcagt	x|||||||x||x|:xxxxxxxx	tCAGTGCACTACAGaactttgt	ATPAF1
bta-miR-148a	ENSBTAT00000073123	ENSBTAG00000000094	284	304	-12.72	tGTCACGT-ATATTaattcagt	x|||||||x||x|:xxxxxxxx	tCAGTGCACTACAGaactttgt	ATPAF1
bta-miR-152	ENSBTAT00000000104	ENSBTAG00000000094	282	304	-15.97	tGTCACGTATATTAATTCAGTtg	x||||||||:xx|xx||x|::xx	tCAGTGCATGACAG-AACTTGgg	ATPAF1
bta-miR-152	ENSBTAT00000070179	ENSBTAG00000000094	282	304	-15.97	tGTCACGTATATTAATTCAGTtg	x||||||||:xx|xx||x|::xx	tCAGTGCATGACAG-AACTTGgg	ATPAF1
bta-miR-152	ENSBTAT00000073123	ENSBTAG00000000094	282	304	-15.97	tGTCACGTATATTAATTCAGTtg	x||||||||:xx|xx||x|::xx	tCAGTGCATGACAG-AACTTGgg	ATPAF1
bta-miR-106a	ENSBTAT00000000106	ENSBTAG00000000097	375	397	-13.06	aTTTCACGTCGAT-TAAATTCCgt	x|||||||xx:||x|x|xx|||xx	aAAAGTGC--TTACAGTGCAGGta	EFCAB14
bta-miR-181b	ENSBTAT00000000106	ENSBTAG00000000097	1621	1644	-10.14	gTGTAAGTATCcttttctgaagta	x||||||||x|xxxxxxxxxxxxx	aACATTCATTGctgtcggtgggtt	EFCAB14
bta-miR-144	ENSBTAT00000000106	ENSBTAG00000000097	884	905	-11.63	cTGTCATAGTCTCC-ACTTtcag	x|||||||x|||x|x||x|xxxx	tACAGTAT-AGATGATGTActag	EFCAB14
bta-miR-196a	ENSBTAT00000000106	ENSBTAG00000000097	30	50	-14.65	aTCCATCAG-GTGTCGTAtgta	x|||||||:x||::x::|xxxx	tAGGTAGTTTCATGTTGTtggg	EFCAB14
bta-miR-2370-5p	ENSBTAT00000000106	ENSBTAG00000000097	1568	1590	-20.05	tCCCTTTTTCTTTCCAATCGGtt	x|||||||x|||||x||:|::xx	tGGGAAAATGAAAG-TTGGTTat	EFCAB14
bta-miR-196a	ENSBTAT00000000107	ENSBTAG00000000098	558	580	-17.91	tTCCATCAGAAGGAGTACGGaag	x|||||||x|||x|xx||::xxx	tAGGTAGT-TTCATGTTGTTggg	SETDB1
bta-miR-1291	ENSBTAT00000000107	ENSBTAG00000000098	155	179	-30.27	cCCGGGACGGACGATCGTGGCGTta	x|||||||x|||xx||xx|:|||xx	tGGCCCTGACTGA-AGACCTGCAgt	SETDB1
bta-miR-2370-5p	ENSBTAT00000000107	ENSBTAG00000000098	437	458	-11.3	cCCCTTTTcgagtagagagtag	x|||||||xxxxxxxxxxxxxx	tGGGAAAAtgaaagttggttat	SETDB1
bta-miR-2431-3p	ENSBTAT00000000107	ENSBTAG00000000098	111	133	-13.74	tTGGGGGTAAAGATAgatgatcc	x|||||||x||xx||xxxxxxxx	cACCCCCACTTGCATgaccctga	SETDB1
bta-miR-6119-3p	ENSBTAT00000000107	ENSBTAG00000000098	381	404	-10.04	aGTTTAGTGTTAGAATCAAAattg	x|||||||:xx|:|||x|x|xxxx	gCAAATCATT-TTTTACTCTccaa	SETDB1
bta-miR-10a	ENSBTAT00000000109	ENSBTAG00000000099	51	73	-11.13	cTGGGACACCcctcccaccccat	x|||||||x|xxxxxxxxxxxxx	tACCCTGTAGatccgaatttgtg	CERS2
bta-let-7d	ENSBTAT00000000109	ENSBTAG00000000099	526	551	-19.2	tCTCCATCCTATTCCCAGTGCAcgtg	x|||||||xx||xx|||::|x|xxxx	aGAGGTAG--TA--GGTTGCATagtt	CERS2
bta-let-7g	ENSBTAT00000000109	ENSBTAG00000000099	530	551	-13.4	tCTCCATCCTattcccagtgca	x|||||||x|xxxxxxxxxxxx	tGAGGTAGTAgtttgtacagtt	CERS2
bta-miR-10b	ENSBTAT00000000109	ENSBTAG00000000099	51	73	-11.13	cTGGGACACCcctcccaccccat	x|||||||x|xxxxxxxxxxxxx	tACCCTGTAGaaccgaatttgtg	CERS2
bta-let-7a-5p	ENSBTAT00000000109	ENSBTAG00000000099	526	551	-15.86	tCTCCATCCTATTCCCAGTGCAcgtg	x|||||||xx||xx|||:::x|xxxx	tGAGGTAG--TA--GGTTGTATagtt	CERS2
bta-let-7b	ENSBTAT00000000109	ENSBTAG00000000099	526	551	-22.8	tCTCCATCCTATTCCCAGTGCACgtg	x|||||||xx||xx|||:::|||xxx	tGAGGTAG--TA--GGTTGTGTGgtt	CERS2
bta-let-7e	ENSBTAT00000000109	ENSBTAG00000000099	531	551	-18.5	tCTCCATCCTattcccagtgc	x|||||||||xxxxxxxxxxx	tGAGGTAGGAggttgtatagt	CERS2
bta-miR-2332	ENSBTAT00000000109	ENSBTAG00000000099	140	166	-18.12	aCCAAATTTCCGTTGACCCACTGTcat	x|||||||x||:xx||x||x||||xxx	cGGTTTAA-GGT--CTTGGAGACAaag	CERS2
bta-miR-2370-5p	ENSBTAT00000000109	ENSBTAG00000000099	470	494	-18.91	tCCCTTTTTCAATTTTCAGTCGAgt	x|||||||xxx|:|||||::|:|xx	tGGGAAAA---TGAAAGTTGGTTat	CERS2
bta-miR-2431-3p	ENSBTAT00000000109	ENSBTAG00000000099	277	299	-26.2	tTGGGGGTGGGGGTCTTGactcc	x||||||||::x||x:||xxxxx	cACCCCCACTTGCATGACcctga	CERS2
bta-miR-320a	ENSBTAT00000000114	ENSBTAG00000000105	2138	2161	-18	aTTTCGACTGATAAATCTCgaata	x|||||||:xx:||x||||xxxxx	aAAAGCTGG--GTTGAGAGggcga	RIT1
bta-miR-106a	ENSBTAT00000000114	ENSBTAG00000000105	1722	1743	-10.88	gTTTCACGATACTAAGGTaatt	x||||||||xxx|x|x||xxxx	aAAAGTGCTTACAGTGCAggta	RIT1
bta-miR-30e-5p	ENSBTAT00000000114	ENSBTAG00000000105	2321	2344	-11.06	cCATTTGTAatacaggggaaaact	x||||||||xxxxxxxxxxxxxxx	tGTAAACATccttgactggaagct	RIT1
bta-miR-192	ENSBTAT00000000114	ENSBTAG00000000105	2079	2100	-20.44	tACTGGATGAGTAA-TGTGGGga	x|||||||:xx|||x|||x||xx	cTGACCTATGAATTGACAGCCag	RIT1
bta-miR-200a	ENSBTAT00000000114	ENSBTAG00000000105	707	729	-18.33	aTTGTGACATCCTATTTCTttcg	x||||||||xx|:|||x||xxxx	tAACACTGTCTGGTAACGAtgtt	RIT1
bta-miR-30a-5p	ENSBTAT00000000114	ENSBTAG00000000105	2321	2344	-13.15	cCATTTGTAatacaggggaaaact	x||||||||xxxxxxxxxxxxxxx	tGTAAACATcctcgactggaagct	RIT1
bta-miR-30f	ENSBTAT00000000114	ENSBTAG00000000105	2321	2344	-10.51	cCATTTGTAATACAGGGGAaaact	x|||||||xxx|xxx|:||xxxxx	tGTAAACACCCTACACTCTcagct	RIT1
bta-miR-92b	ENSBTAT00000000114	ENSBTAG00000000105	1757	1777	-11.17	tTAACGTGA-CATGAATAGAag	x||||||||x||x|xx:x||xx	tATTGCACTCGTCCCGGCCTcc	RIT1
bta-miR-2370-5p	ENSBTAT00000000114	ENSBTAG00000000105	851	873	-13.19	cCCCTTTTTTTATTTGGACAtgt	x|||||||x:|x||:::x||xxx	tGGGAAAATGA-AAGTTGGTtat	RIT1
bta-miR-11991	ENSBTAT00000000114	ENSBTAG00000000105	598	617	-15.18	gACAAGAC-TAGGATGGAaaa	x|||||||x|||:|:x:|xxx	aTGTTCTGTATCTTGATTgta	RIT1
bta-miR-10a	ENSBTAT00000000119	ENSBTAG00000000108	555	580	-13.64	cTGGGACAACTTGTTCGTGTAAAgtg	x|||||||x||x|xxx|:x||||xxx	tACCCTGTAGATC---CGAATTTgtg	KHDC4
bta-miR-10b	ENSBTAT00000000119	ENSBTAG00000000108	555	580	-17.29	cTGGGACAACTTGTTCGTGTAAAgtg	x|||||||x||||xxx|:x||||xxx	tACCCTGTAGAAC---CGAATTTgtg	KHDC4
bta-miR-143	ENSBTAT00000000119	ENSBTAG00000000108	766	787	-10.51	tCTCTACTCCTTCAAAaatcta	x|||||||x|x|x|x|xxxxxx	tGAGATGAAGCACTGTagctcg	KHDC4
bta-miR-182	ENSBTAT00000000119	ENSBTAG00000000108	1144	1168	-11.25	aAACCGTTTTGGATATTacggttct	x|||||||x:xx||x||xxxxxxxx	tTTGGCAATGG-TAGAActcacact	KHDC4
bta-miR-148a	ENSBTAT00000079944	ENSBTAG00000000109	81	102	-13.89	gGTCACGTacacacccatccga	x|||||||xxxxxxxxxxxxxx	tCAGTGCActacagaactttgt	NPTXR
bta-miR-320a	ENSBTAT00000079944	ENSBTAG00000000109	2630	2652	-20.59	gTTTCGACCTCAGGTTTGTTGtc	x||||||||x||:x|:|x::|xx	aAAAGCTGG-GTTGAGAGGGCga	NPTXR
bta-miR-31	ENSBTAT00000079944	ENSBTAG00000000109	1625	1646	-16.45	tCCGTTCTTCATACCACACCcc	x|||||||x|xx|||xx|x|xx	aGGCAAGATGC-TGGCATAGct	NPTXR
bta-miR-181b	ENSBTAT00000079944	ENSBTAG00000000109	2557	2581	-15.16	cTGTAAGTAGTAAGACCTTACattt	x||||||||::x|x|x|:x||xxxx	aACATTCATTGCTGTCGG-TGggtt	NPTXR
bta-miR-30e-5p	ENSBTAT00000079944	ENSBTAG00000000109	3014	3039	-11.79	cCATTTGTCCGAGTCCTCGTCATCta	x|||||||xx||:xx||x::|x||xx	tGTAAACATCCTT--GACTGGAAGct	NPTXR
bta-miR-181c	ENSBTAT00000079944	ENSBTAG00000000109	2558	2581	-10.86	cTGTAAGTAGTAAGACCTTACAtt	x|||||||x|x|x:x||x:x||xx	aACATTCAACCTGTCGGTGAGTtt	NPTXR
bta-miR-30a-5p	ENSBTAT00000079944	ENSBTAG00000000109	3014	3039	-15.5	cCATTTGTCCGAGTCCTCGTCATCta	x|||||||xx|||xx||x::|x||xx	tGTAAACATCCTC--GACTGGAAGct	NPTXR
bta-miR-152	ENSBTAT00000079944	ENSBTAG00000000109	81	102	-21.14	gGTCACGTACacacccatccga	x|||||||||xxxxxxxxxxxx	tCAGTGCATGacagaacttggg	NPTXR
bta-miR-30f	ENSBTAT00000079944	ENSBTAG00000000109	3017	3039	-11.31	cCATTTGTCCGA-GTCCTCGTCat	x|||||||xx||x||xxxx|||xx	tGTAAACACCCTACACTCTCAGct	NPTXR
bta-miR-769	ENSBTAT00000079944	ENSBTAG00000000109	1133	1154	-22.86	cCTCTGGAGAGTCTTTACTggt	x||||||||xx:|xxx|||xxx	tGAGACCTCCGGGTTCTGAgct	NPTXR
bta-miR-1291	ENSBTAT00000079944	ENSBTAG00000000109	469	491	-22.88	aCCGGGACTT-CTCCTtcccccgt	x||||||||xx||x||xxxxxxxx	tGGCCCTGACTGAAGAcctgcagt	NPTXR
bta-miR-1296	ENSBTAT00000079944	ENSBTAG00000000109	1426	1449	-26.24	cATCCCGGGTCCAATCGGTGGtcg	x||||||||x||x|xx|||:|xxx	tTAGGGCCCTGGCT--CCATCtcc	NPTXR
bta-miR-2303	ENSBTAT00000079944	ENSBTAG00000000109	3530	3553	-17.07	tGACTTACGTCTCAGTCTTACgac	x|||||||x|xx|||x||x||xxx	tCTGAATG-AT-GTC-GACTGatg	NPTXR
bta-miR-2370-5p	ENSBTAT00000079944	ENSBTAG00000000109	3315	3336	-15.79	aCCCTTTTAgaccgtctattct	x||||||||xxxxxxxxxxxxx	tGGGAAAATgaaagttggttat	NPTXR
bta-miR-3432a	ENSBTAT00000079944	ENSBTAG00000000109	3840	3861	-22.16	cCGCCCTAGtccctccgcccaa	x||||||||xxxxxxxxxxxxx	tGCGGGATCtttagttgtggtg	NPTXR
bta-miR-6535	ENSBTAT00000079944	ENSBTAG00000000109	2092	2115	-35.7	aTCCCCCTCAACCCGACCTTCacc	x||||||||xxx||:||||:|xxx	tAGGGGGAGC--GGTTGGAGGact	NPTXR
bta-miR-200a	ENSBTAT00000044762	ENSBTAG00000000111	104	126	-21.1	aTTGTGACGGCCCATgtcattgt	x|||||||:|x||||xxxxxxxx	tAACACTGTCTGGTAacgatgtt	UGP2
bta-miR-92b	ENSBTAT00000044762	ENSBTAG00000000111	222	243	-13.11	aTAACGTGAaagtctacttaat	x||||||||xxxxxxxxxxxxx	tATTGCACTcgtcccggcctcc	UGP2
bta-miR-193a-5p	ENSBTAT00000033917	ENSBTAG00000000113	448	468	-20.34	tCCCAGAA-TGCCgacgtcgga	x|||||||x:|||xxxxxxxxx	tGGGTCTTTGCGGgcgagatga	ARHGEF2
bta-miR-193a-5p	ENSBTAT00000074754	ENSBTAG00000000113	448	468	-20.34	tCCCAGAA-TGCCgacgtcgga	x|||||||x:|||xxxxxxxxx	tGGGTCTTTGCGGgcgagatga	ARHGEF2
bta-miR-143	ENSBTAT00000033917	ENSBTAG00000000113	1371	1391	-14.17	aCTCTACTTT-TGTCcaaaaaa	x||||||||:x||x|xxxxxxx	tGAGATGAAGCACTGtagctcg	ARHGEF2
bta-miR-143	ENSBTAT00000074754	ENSBTAG00000000113	1371	1391	-14.17	aCTCTACTTT-TGTCcaaaaaa	x||||||||:x||x|xxxxxxx	tGAGATGAAGCACTGtagctcg	ARHGEF2
bta-miR-671	ENSBTAT00000033917	ENSBTAG00000000113	568	592	-24.29	tCCTTCGGTCCAATTCAGGGACCcc	x|||||||xx|xx:||xxx||||xx	aGGAAGCCCTG--GAGGGGCTGGag	ARHGEF2
bta-miR-671	ENSBTAT00000074754	ENSBTAG00000000113	568	592	-24.29	tCCTTCGGTCCAATTCAGGGACCcc	x|||||||xx|xx:||xxx||||xx	aGGAAGCCCTG--GAGGGGCTGGag	ARHGEF2
bta-miR-1291	ENSBTAT00000033917	ENSBTAG00000000113	479	502	-30.47	aCCGGGACTGGTGTCGGGAAGgac	x|||||||||::x||x|||x|xxx	tGGCCCTGACTGAAGACCTGCagt	ARHGEF2
bta-miR-1291	ENSBTAT00000074754	ENSBTAG00000000113	479	502	-30.47	aCCGGGACTGGTGTCGGGAAGgac	x|||||||||::x||x|||x|xxx	tGGCCCTGACTGAAGACCTGCagt	ARHGEF2
bta-miR-2285bf	ENSBTAT00000033917	ENSBTAG00000000113	709	729	-10.63	tTTTGTGCACGTcaaccgaaa	x|||||||xx||xxxxxxxxx	aAAACACGAACAaactttttg	ARHGEF2
bta-miR-2285bf	ENSBTAT00000074754	ENSBTAG00000000113	709	729	-10.63	tTTTGTGCACGTcaaccgaaa	x|||||||xx||xxxxxxxxx	aAAACACGAACAaactttttg	ARHGEF2
bta-miR-143	ENSBTAT00000000143	ENSBTAG00000000131	254	276	-17.76	cCTCTACTGACGGGGTGagtccg	x|||||||xx||x|:::xxxxxx	tGAGATGAA-GCACTGTagctcg	SENP3
bta-miR-2370-5p	ENSBTAT00000000143	ENSBTAG00000000131	141	162	-11.38	tCCCTTTTTTTTTATGTCttta	x|||||||x:|||xx::|xxxx	tGGGAAAATGAAAGTTGGttat	SENP3
bta-miR-2303	ENSBTAT00000000144	ENSBTAG00000000132	302	323	-13.23	tGACTTACTTACAAAAGTCTcc	x||||||||x|||xxx|x||xx	tCTGAATGA-TGTCGACTGAtg	EIF4A1
bta-miR-497	ENSBTAT00000000147	ENSBTAG00000000134	69	90	-20.59	gTCGTCGTTTGACtaggtctgc	x|||||||x||||xxxxxxxxx	cAGCAGCACACTGtggtttgta	MPDU1
bta-miR-1291	ENSBTAT00000000147	ENSBTAG00000000134	443	465	-21.42	cCCGGGACGGACT-CAGTAAGaag	x|||||||x||||x|x|x|x|xxx	tGGCCCTGACTGAAGACCTGCagt	MPDU1
bta-miR-148a	ENSBTAT00000000158	ENSBTAG00000000137	1060	1081	-15.84	tGTCACGTAACGTGTTTACAtg	x|||||||x|x||x||x|x|xx	tCAGTGCACTACAGAACTTTgt	FRYL
bta-miR-320a	ENSBTAT00000000158	ENSBTAG00000000137	70	97	-21.59	tTTTCGACAGTCACTTGACGTTCCCagg	x|||||||xx:||xxxx||x:||||xxx	aAAAGCTG--GGT----TGAGAGGGcga	FRYL
bta-miR-181b	ENSBTAT00000000158	ENSBTAG00000000137	1370	1393	-11.8	aTGTAAGTAAAGAAAatgttttac	x|||||||||x||x|xxxxxxxxx	aACATTCATTGCTGTcggtgggtt	FRYL
bta-miR-342	ENSBTAT00000000158	ENSBTAG00000000137	619	644	-23.61	cGAGTGTGTGTGTGTGTGTGTGTGtt	x||||||||x|x|:x|:|||x||:xx	tCTCACACAGAAAT-CGCACCCATct	FRYL
bta-miR-497	ENSBTAT00000000158	ENSBTAG00000000137	854	878	-12.09	cTCGTCGTAAGGTTATTGCAAttgt	x|||||||xxx||x|:xx|||xxxx	cAGCAGCA---CACTGTGGTTtgta	FRYL
bta-miR-146b	ENSBTAT00000000158	ENSBTAG00000000137	863	886	-18.66	tCTCTTGACTCGTCGTAaggttat	x|||||||||x:xx|||xxxxxxx	tGAGAACTGAATTCCATaggctgt	FRYL
bta-miR-152	ENSBTAT00000000158	ENSBTAG00000000137	1060	1081	-16.83	tGTCACGTAACGTGTTTAcatg	x||||||||xx||x||x|xxxx	tCAGTGCATGACAGAACTtggg	FRYL
bta-miR-92b	ENSBTAT00000000158	ENSBTAG00000000137	1054	1075	-11.05	gTAACGTGtttacatgttcttt	x|||||||xxxxxxxxxxxxxx	tATTGCACtcgtcccggcctcc	FRYL
bta-miR-2303	ENSBTAT00000000158	ENSBTAG00000000137	2	22	-14.78	gGACTTACggacttcaaagag	x|||||||xxxxxxxxxxxxx	tCTGAATGatgtcgactgatg	FRYL
bta-miR-2370-5p	ENSBTAT00000000158	ENSBTAG00000000137	546	567	-13.02	aCCCTTTTTTTTTTttttttta	x|||||||x:|||:xxxxxxxx	tGGGAAAATGAAAGttggttat	FRYL
bta-miR-1949	ENSBTAT00000000158	ENSBTAG00000000137	1032	1054	-11.52	tTATGGTCaaaattagatatgtc	x|||||||xxxxxxxxxxxxxxx	tATACCAGgatgccagcatagtt	FRYL
bta-miR-200a	ENSBTAT00000000167	ENSBTAG00000000146	427	446	-10.33	tTTGTGAC---CTTTTGggtaaa	x|||||||xxx|:x|||xxxxxx	tAACACTGTCTGGTAACgatgtt	FARP1
bta-miR-1291	ENSBTAT00000000167	ENSBTAG00000000146	806	829	-24.91	gCCGGGACCGGTGACTGTATGTgc	x|||||||x|::xx|||x|:||xx	tGGCCCTGACTGAAGACCTGCAgt	FARP1
bta-miR-2332	ENSBTAT00000000167	ENSBTAG00000000146	137	166	-19.78	tCCAAATTTTTACCAGGACACCCCTGTcca	x|||||||xxxx||||:||xx|x||||xxx	cGGTTTAA----GGTCTTG--GAGACAaag	FARP1
bta-miR-574	ENSBTAT00000000167	ENSBTAG00000000146	1356	1380	-28.26	aCTCACACGACCTAACAC-CGCACtc	x|||||||x||x:|x|||x|:|||xx	tGAGTGTG-TGTGT-GTGAGTGTGtg	FARP1
bta-miR-10162-5p	ENSBTAT00000000167	ENSBTAG00000000146	122	145	-23.46	cCCTGTCCACTCTCAACGACGCtt	x|||||||xx|x||xx||||:|xx	tGGACAGGCCA-AGCCGCTGTGca	FARP1
bta-miR-1949	ENSBTAT00000000167	ENSBTAG00000000146	164	185	-14.39	cTATGGTCG-ACTTTTCTGTTcc	x|||||||xx||xx|:x|:|:xx	tATACCAGGATGCCAGCATAGtt	FARP1
bta-miR-148a	ENSBTAT00000029270	ENSBTAG00000000147	422	443	-12.05	tGTCACGTTATaaccccgagtc	x|||||||x||xxxxxxxxxxx	tCAGTGCACTAcagaactttgt	RIC8B
bta-miR-193a-5p	ENSBTAT00000029270	ENSBTAG00000000147	31	52	-15.9	tCCCAGAATCagtagtgaaacc	x|||||||x|xxxxxxxxxxxx	tGGGTCTTTGcgggcgagatga	RIC8B
bta-miR-191	ENSBTAT00000029270	ENSBTAG00000000147	664	686	-17.97	aTTGCCTTTGGTTTTTCATgaaa	x|||||||x||x|||||x|xxxx	cAACGGAATCCCAAAAGCAgctg	RIC8B
bta-miR-192	ENSBTAT00000067140	ENSBTAG00000000147	909	929	-14.19	tACTGGATA--TACATGTTtacc	x||||||||xx||xx|||:xxxx	cTGACCTATGAATTGACAGccag	RIC8B
bta-miR-192	ENSBTAT00000083994	ENSBTAG00000000147	1065	1085	-14.19	tACTGGATA--TACATGTTtacc	x||||||||xx||xx|||:xxxx	cTGACCTATGAATTGACAGccag	RIC8B
bta-miR-192	ENSBTAT00000086893	ENSBTAG00000000147	909	929	-14.19	tACTGGATA--TACATGTTtacc	x||||||||xx||xx|||:xxxx	cTGACCTATGAATTGACAGccag	RIC8B
bta-miR-342	ENSBTAT00000067140	ENSBTAG00000000147	344	368	-13.39	cGAGTGTGTTcactctccttcctgt	x||||||||:xxxxxxxxxxxxxxx	tCTCACACAGaaatcgcacccatct	RIC8B
bta-miR-342	ENSBTAT00000083994	ENSBTAG00000000147	500	524	-13.39	cGAGTGTGTTcactctccttcctgt	x||||||||:xxxxxxxxxxxxxxx	tCTCACACAGaaatcgcacccatct	RIC8B
bta-miR-342	ENSBTAT00000086893	ENSBTAG00000000147	344	368	-13.39	cGAGTGTGTTcactctccttcctgt	x||||||||:xxxxxxxxxxxxxxx	tCTCACACAGaaatcgcacccatct	RIC8B
bta-miR-144	ENSBTAT00000029270	ENSBTAG00000000147	886	906	-12.34	cTGTCATAG-TACCGCCCGAag	x|||||||xx|||x:|xx||xx	tACAGTATAGATGATGTACTag	RIC8B
bta-miR-152	ENSBTAT00000029270	ENSBTAG00000000147	422	443	-15.79	tGTCACGTtataaccccgagtc	x|||||||xxxxxxxxxxxxxx	tCAGTGCAtgacagaacttggg	RIC8B
bta-miR-182	ENSBTAT00000067140	ENSBTAG00000000147	299	320	-19.43	gAACCGTT--TGTCTTGACGGTct	x|||||||xx::||||||xx||xx	tTTGGCAATGGTAGAACTCACAct	RIC8B
bta-miR-182	ENSBTAT00000083994	ENSBTAG00000000147	455	476	-19.43	gAACCGTT--TGTCTTGACGGTct	x|||||||xx::||||||xx||xx	tTTGGCAATGGTAGAACTCACAct	RIC8B
bta-miR-182	ENSBTAT00000086893	ENSBTAG00000000147	299	320	-19.43	gAACCGTT--TGTCTTGACGGTct	x|||||||xx::||||||xx||xx	tTTGGCAATGGTAGAACTCACAct	RIC8B
bta-miR-2332	ENSBTAT00000083994	ENSBTAG00000000147	43	66	-11.5	aCCAAATTCgttgaggagagaatc	x||||||||xxxxxxxxxxxxxxx	cGGTTTAAGgtcttggagacaaag	RIC8B
bta-miR-31	ENSBTAT00000000172	ENSBTAG00000000149	1013	1034	-22.57	tCCGTTCTGATGACCTCACCca	x|||||||x|:||||xx|x|xx	aGGCAAGA-TGCTGGCATAGct	USP40
bta-miR-31	ENSBTAT00000075085	ENSBTAG00000000149	1013	1034	-22.57	tCCGTTCTGATGACCTCACCca	x|||||||x|:||||xx|x|xx	aGGCAAGA-TGCTGGCATAGct	USP40
bta-miR-497	ENSBTAT00000000172	ENSBTAG00000000149	929	951	-16.17	aTCGTCGTGTCAACGTTAtttcg	x|||||||||x|x|:::|xxxxx	cAGCAGCACACT-GTGGTttgta	USP40
bta-miR-497	ENSBTAT00000075085	ENSBTAG00000000149	929	951	-16.17	aTCGTCGTGTCAACGTTAtttcg	x|||||||||x|x|:::|xxxxx	cAGCAGCACACT-GTGGTttgta	USP40
bta-miR-2370-5p	ENSBTAT00000000172	ENSBTAG00000000149	484	505	-14.78	gCCCTTTTTCTTCCTTGCGAaa	x|||||||x|||x|xxx|:|xx	tGGGAAAATGAAAGTTGGTTat	USP40
bta-miR-2370-5p	ENSBTAT00000075085	ENSBTAG00000000149	484	505	-14.78	gCCCTTTTTCTTCCTTGCGAaa	x|||||||x|||x|xxx|:|xx	tGGGAAAATGAAAGTTGGTTat	USP40
bta-miR-10162-5p	ENSBTAT00000070077	ENSBTAG00000000149	350	375	-28.41	cCCTGTCCT-TTCGGGTACCGACACcg	x|||||||xx|||||xxxx||||||xx	tGGACAGGCCAAGCC----GCTGTGca	USP40
bta-miR-10162-5p	ENSBTAT00000072074	ENSBTAG00000000149	350	375	-28.41	cCCTGTCCT-TTCGGGTACCGACACcg	x|||||||xx|||||xxxx||||||xx	tGGACAGGCCAAGCC----GCTGTGca	USP40
bta-miR-10162-5p	ENSBTAT00000073057	ENSBTAG00000000149	350	375	-28.41	cCCTGTCCT-TTCGGGTACCGACACcg	x|||||||xx|||||xxxx||||||xx	tGGACAGGCCAAGCC----GCTGTGca	USP40
bta-miR-10162-5p	ENSBTAT00000073478	ENSBTAG00000000149	350	375	-28.41	cCCTGTCCT-TTCGGGTACCGACACcg	x|||||||xx|||||xxxx||||||xx	tGGACAGGCCAAGCC----GCTGTGca	USP40
bta-miR-10162-5p	ENSBTAT00000081039	ENSBTAG00000000149	350	375	-28.41	cCCTGTCCT-TTCGGGTACCGACACcg	x|||||||xx|||||xxxx||||||xx	tGGACAGGCCAAGCC----GCTGTGca	USP40
bta-miR-10162-5p	ENSBTAT00000083681	ENSBTAG00000000149	350	375	-28.41	cCCTGTCCT-TTCGGGTACCGACACcg	x|||||||xx|||||xxxx||||||xx	tGGACAGGCCAAGCC----GCTGTGca	USP40
bta-miR-320a	ENSBTAT00000045527	ENSBTAG00000000152	75	97	-11.66	tTTTCGACTTGTATTaattaatg	x|||||||:::x|:|xxxxxxxx	aAAAGCTGGGT-TGAgagggcga	RANBP2
bta-let-7d	ENSBTAT00000045527	ENSBTAG00000000152	687	707	-20.95	aCTCCATCATCTT-TGTCTact	x||||||||||:xx:||x|xxx	aGAGGTAGTAGGTTGCATAgtt	RANBP2
bta-let-7g	ENSBTAT00000045527	ENSBTAG00000000152	689	707	-24.29	aCTCCATCATC---TTTGTCta	x||||||||||xxx:x||||xx	tGAGGTAGTAGTTTGTACAGtt	RANBP2
bta-let-7a-5p	ENSBTAT00000045527	ENSBTAG00000000152	686	707	-24.23	aCTCCATCATCTttgtctactg	x||||||||||:xxxxxxxxxx	tGAGGTAGTAGGttgtatagtt	RANBP2
bta-let-7b	ENSBTAT00000045527	ENSBTAG00000000152	686	707	-23.64	aCTCCATCATCTttgtctactg	x||||||||||:xxxxxxxxxx	tGAGGTAGTAGGttgtgtggtt	RANBP2
bta-let-7e	ENSBTAT00000045527	ENSBTAG00000000152	687	707	-19.6	aCTCCATCATCTttgtctact	x|||||||x||:xxxxxxxxx	tGAGGTAGGAGGttgtatagt	RANBP2
bta-miR-196a	ENSBTAT00000045527	ENSBTAG00000000152	685	706	-10.65	cTCCATCAtctttgtctactgt	x|||||||xxxxxxxxxxxxxx	tAGGTAGTttcatgttgttggg	RANBP2
bta-miR-30e-5p	ENSBTAT00000000184	ENSBTAG00000000160	501	524	-13.15	cCATTTGTGATGACTTAatgtgta	x|||||||:xx:|||x|xxxxxxx	tGTAAACATCCTTGACTggaagct	CBS
bta-miR-30e-5p	ENSBTAT00000087445	ENSBTAG00000000160	501	524	-13.15	cCATTTGTGATGACTTAatgtgta	x|||||||:xx:|||x|xxxxxxx	tGTAAACATCCTTGACTggaagct	CBS
bta-miR-30a-5p	ENSBTAT00000000184	ENSBTAG00000000160	500	524	-13.15	cCATTTGTGATGACTTAATGTgtag	x|||||||x|x||x:|x|:x|xxxx	tGTAAACA-TCCTCGACTGGAagct	CBS
bta-miR-30a-5p	ENSBTAT00000087445	ENSBTAG00000000160	500	524	-13.15	cCATTTGTGATGACTTAATGTgtag	x|||||||x|x||x:|x|:x|xxxx	tGTAAACA-TCCTCGACTGGAagct	CBS
bta-miR-144	ENSBTAT00000000184	ENSBTAG00000000160	664	684	-11.94	gTGTCATA-CTAAGAGAaatat	x|||||||x|||xx|x|xxxxx	tACAGTATAGATGATGTactag	CBS
bta-miR-144	ENSBTAT00000087445	ENSBTAG00000000160	664	684	-11.94	gTGTCATA-CTAAGAGAaatat	x|||||||x|||xx|x|xxxxx	tACAGTATAGATGATGTactag	CBS
bta-miR-30f	ENSBTAT00000000184	ENSBTAG00000000160	499	524	-13.61	cCATTTGTGATGACTTAATGTGTaga	x||||||||xx||xx|x|x|x||xxx	tGTAAACACC-CTACACT-CTCAgct	CBS
bta-miR-30f	ENSBTAT00000087445	ENSBTAG00000000160	499	524	-13.61	cCATTTGTGATGACTTAATGTGTaga	x||||||||xx||xx|x|x|x||xxx	tGTAAACACC-CTACACT-CTCAgct	CBS
bta-miR-1291	ENSBTAT00000000184	ENSBTAG00000000160	119	142	-21.79	gCCGGGACCCGATTCgatattcgt	x|||||||xx:x|||xxxxxxxxx	tGGCCCTGACTGAAGacctgcagt	CBS
bta-miR-1291	ENSBTAT00000087445	ENSBTAG00000000160	119	142	-21.79	gCCGGGACCCGATTCgatattcgt	x|||||||xx:x|||xxxxxxxxx	tGGCCCTGACTGAAGacctgcagt	CBS
bta-miR-2431-3p	ENSBTAT00000000184	ENSBTAG00000000160	710	731	-18.03	tTGGGGGTTT-TGTATTacattt	x|||||||xxx:|||:|xxxxxx	cACCCCCACTTGCATGAccctga	CBS
bta-miR-2431-3p	ENSBTAT00000087445	ENSBTAG00000000160	710	731	-18.03	tTGGGGGTTT-TGTATTacattt	x|||||||xxx:|||:|xxxxxx	cACCCCCACTTGCATGAccctga	CBS
bta-miR-6121-3p	ENSBTAT00000000184	ENSBTAG00000000160	555	574	-14.12	cGCCTACTTTCcaaaacctt	x|||||||x:|xxxxxxxxx	cCGGATGATGGacactgagg	CBS
bta-miR-6121-3p	ENSBTAT00000087445	ENSBTAG00000000160	555	574	-14.12	cGCCTACTTTCcaaaacctt	x|||||||x:|xxxxxxxxx	cCGGATGATGGacactgagg	CBS
bta-miR-181b	ENSBTAT00000000186	ENSBTAG00000000162	421	445	-18.32	gTGTAAGTAGACGTTTTTCTTCCca	x||||||||x|||x:xx:|x:||xx	aACATTCAT-TGCTGTCGGTGGGtt	ANAPC16
bta-miR-181c	ENSBTAT00000000186	ENSBTAG00000000162	424	445	-14.12	gTGTAAGTAG-AC-GTTTTTCttc	x|||||||x|x||x|::x:||xxx	aACATTCAACCTGTCGGTGAGttt	ANAPC16
bta-miR-143	ENSBTAT00000000186	ENSBTAG00000000162	6	25	-17.67	gCTCTACTG-GT-AGGTCcggt	x|||||||xx||x|x:||xxxx	tGAGATGAAGCACTGTAGctcg	ANAPC16
bta-miR-181b	ENSBTAT00000000187	ENSBTAG00000000163	531	552	-20.41	aTGTAAGTA-CG-CAGACATTCta	x||||||||x||x|||x||::|xx	aACATTCATTGCTGTCGGTGGGtt	DDIT4
bta-miR-30e-5p	ENSBTAT00000000187	ENSBTAG00000000163	731	754	-20.18	aCATTTGTCAAGATCT-ACCTTCta	x|||||||x|x||x||x||||||xx	tGTAAACA-TCCTTGACTGGAAGct	DDIT4
bta-miR-181c	ENSBTAT00000000187	ENSBTAG00000000163	530	552	-17.92	aTGTAAGTACG-CAGACATTCtat	x|||||||xx|x|||x||:||xxx	aACATTCAACCTGTCGGTGAGttt	DDIT4
bta-miR-200a	ENSBTAT00000000187	ENSBTAG00000000163	140	162	-11.57	tTTGTGACACAaggggggtggaa	x||||||||x|xxxxxxxxxxxx	tAACACTGTCTggtaacgatgtt	DDIT4
bta-miR-30a-5p	ENSBTAT00000000187	ENSBTAG00000000163	731	754	-20.08	aCATTTGTCAAGATCT-ACCTTCta	x|||||||x|x||x||x||||||xx	tGTAAACA-TCCTCGACTGGAAGct	DDIT4
bta-miR-342	ENSBTAT00000000187	ENSBTAG00000000163	165	189	-14.35	cGAGTGTGgagtcactcgaaggatc	x|||||||xxxxxxxxxxxxxxxxx	tCTCACACagaaatcgcacccatct	DDIT4
bta-miR-497	ENSBTAT00000082222	ENSBTAG00000000177	123	143	-17.23	gTCGTCGTCCGA-GTCGAGTcc	x|||||||xx||x::|:|::xx	cAGCAGCACACTGTGGTTTGta	MSLN
bta-miR-6119-3p	ENSBTAT00000000207	ENSBTAG00000000182	100	121	-10.85	tGTTTAGTTAGCGA-GATAaacc	x|||||||x|:x:|x||x|xxxx	gCAAATCATTTTTTACTCTccaa	SPINT2
bta-miR-6119-3p	ENSBTAT00000071547	ENSBTAG00000000182	100	121	-10.85	tGTTTAGTTAGCGA-GATAaacc	x|||||||x|:x:|x||x|xxxx	gCAAATCATTTTTTACTCTccaa	SPINT2
bta-miR-6119-3p	ENSBTAT00000080849	ENSBTAG00000000182	100	121	-10.85	tGTTTAGTTAGCGA-GATAaacc	x|||||||x|:x:|x||x|xxxx	gCAAATCATTTTTTACTCTccaa	SPINT2
bta-miR-144	ENSBTAT00000000210	ENSBTAG00000000184	779	802	-11.98	cTGTCATAGTTGGATGTCATAAta	x|||||||x:|xx|:xx|||x|xx	tACAGTATAGA--TGATGTACTag	EIF2AK3
bta-miR-6119-5p	ENSBTAT00000000210	ENSBTAG00000000184	603	625	-11.47	cCTCCATTTTcatgttttttggg	x|||||||||xxxxxxxxxxxxx	aGAGGTAAAAaattgatttgact	EIF2AK3
bta-miR-6119-5p	ENSBTAT00000071413	ENSBTAG00000000184	603	625	-11.47	cCTCCATTTTcatgttttttggg	x|||||||||xxxxxxxxxxxxx	aGAGGTAAAAaattgatttgact	EIF2AK3
bta-miR-10a	ENSBTAT00000000233	ENSBTAG00000000199	283	313	-19.87	tTGGGACAAACGGTCCAGTAGGACTAAAaga	x|||||||xxxxx||xxx||||xx||||xxx	tACCCTGT-----AG---ATCCGAATTTgtg	PDP1
bta-miR-181b	ENSBTAT00000000233	ENSBTAG00000000199	2065	2090	-11.3	aTGTAAGTTTAAAGATTGTaggttaa	x|||||||xx||x||:x|:xxxxxxx	aACATTCA--TTGCTGTCGgtgggtt	PDP1
bta-miR-192	ENSBTAT00000000233	ENSBTAG00000000199	1048	1069	-12.79	aACTGGATA-TGGATTcacccct	x||||||||x|x:|:|xxxxxxx	cTGACCTATGAATTGAcagccag	PDP1
bta-miR-425-5p	ENSBTAT00000000233	ENSBTAG00000000199	2209	2230	-13.41	tACTGTGCAAtctttcatattt	x|||||||x|xxxxxxxxxxxx	aTGACACGATcactcccgttga	PDP1
bta-miR-10b	ENSBTAT00000000233	ENSBTAG00000000199	291	313	-15.48	tTGGGACAaacggtccagtagga	x|||||||xxxxxxxxxxxxxxx	tACCCTGTagaaccgaatttgtg	PDP1
bta-miR-497	ENSBTAT00000000233	ENSBTAG00000000199	875	896	-16.11	gTCGTCGTCAGATGggtagtgt	x|||||||xx||::xxxxxxxx	cAGCAGCACACTGTggtttgta	PDP1
bta-miR-143	ENSBTAT00000000233	ENSBTAG00000000199	1882	1901	-11.61	tCTCTACT-C-TGAAATaattc	x|||||||x|x|||x||xxxxx	tGAGATGAAGCACTGTAgctcg	PDP1
bta-miR-2370-5p	ENSBTAT00000000233	ENSBTAG00000000199	1656	1677	-12.63	cCCCTTTTTTTTTCcggagtct	x|||||||x:||||xxxxxxxx	tGGGAAAATGAAAGttggttat	PDP1
bta-miR-11991	ENSBTAT00000000233	ENSBTAG00000000199	1442	1462	-15.54	tACAAGACATAATTTTGAata	x||||||||||xxx:|:|xxx	aTGTTCTGTATCTTGATTgta	PDP1
bta-miR-148a	ENSBTAT00000000237	ENSBTAG00000000202	1048	1069	-14.37	aGTCACGTttccgacctcgatc	x|||||||xxxxxxxxxxxxxx	tCAGTGCActacagaactttgt	SLC25A19
bta-miR-10a	ENSBTAT00000000237	ENSBTAG00000000202	294	318	-20.38	cTGGGACATGGCCCGGGTCAGGgtc	x||||||||xx|xx||x|x|::xxx	tACCCTGTA--GATCCGAATTTgtg	SLC25A19
bta-miR-10b	ENSBTAT00000000237	ENSBTAG00000000202	294	318	-20.38	cTGGGACATGGCCCGGGTCAGGgtc	x||||||||xx|xx||x|x|::xxx	tACCCTGTA--GAACCGAATTTgtg	SLC25A19
bta-miR-152	ENSBTAT00000000237	ENSBTAG00000000202	1047	1069	-17.27	aGTCACGTTTCCGACCTCGATct	x|||||||xx|x|x|x|x:|:xx	tCAGTGCAT-GACAGAACTTGgg	SLC25A19
bta-miR-1296	ENSBTAT00000000237	ENSBTAG00000000202	968	989	-21.68	gATCCCGGTACGAAGGgtccct	x|||||||x||xx|||xxxxxx	tTAGGGCCCTGGCTCCatctcc	SLC25A19
bta-miR-2431-3p	ENSBTAT00000000237	ENSBTAG00000000202	650	673	-29.39	gTGGGGGTGACGGTCACCGCGGcg	x|||||||||xx||x||x|x|:xx	cACCCCCACTTGCA-TGACCCTga	SLC25A19
bta-miR-144	ENSBTAT00000000240	ENSBTAG00000000203	567	591	-14.46	aTGTCATAGTCATGTGTTCATCAtt	x|||||||x||x|::x|x|||x|xx	tACAGTAT-AG-ATG-ATGTACTag	ATP6V1G1
bta-miR-2370-5p	ENSBTAT00000000240	ENSBTAG00000000203	350	370	-10.39	tCCCTTTT-TTTACGAaattag	x|||||||x:||x|:|xxxxxx	tGGGAAAATGAAAGTTggttat	ATP6V1G1
bta-miR-6119-5p	ENSBTAT00000000240	ENSBTAG00000000203	195	218	-14.76	aCTCCATTTTTCTATGTAGAaacc	x||||||||||x||xx||:|xxxx	aGAGGTAAAAA-ATTGATTTgact	ATP6V1G1
bta-miR-31	ENSBTAT00000000242	ENSBTAG00000000204	402	420	-13.1	cCCGTTCT-TG-TTGAATTtt	x|||||||x:|x::|x||:xx	aGGCAAGATGCTGGCATAGct	TMEM268
bta-miR-31	ENSBTAT00000055284	ENSBTAG00000000204	510	528	-13.1	cCCGTTCT-TG-TTGAATTtt	x|||||||x:|x::|x||:xx	aGGCAAGATGCTGGCATAGct	TMEM268
bta-miR-193a-5p	ENSBTAT00000000242	ENSBTAG00000000204	737	758	-23.52	cCCCAGAAATCTAAGCCCgggt	x||||||||:x:xx||x|xxxx	tGGGTCTTTGCGGGCGAGatga	TMEM268
bta-miR-193a-5p	ENSBTAT00000055284	ENSBTAG00000000204	845	866	-23.52	cCCCAGAAATCTAAGCCCgggt	x||||||||:x:xx||x|xxxx	tGGGTCTTTGCGGGCGAGatga	TMEM268
bta-miR-497	ENSBTAT00000000242	ENSBTAG00000000204	114	137	-20.74	tTCGTCGTGTCTTTCATCGAGTct	x|||||||||xxxx||:|:|::xx	cAGCAGCACACT--GTGGTTTGta	TMEM268
bta-miR-497	ENSBTAT00000055284	ENSBTAG00000000204	222	245	-20.74	tTCGTCGTGTCTTTCATCGAGTct	x|||||||||xxxx||:|:|::xx	cAGCAGCACACT--GTGGTTTGta	TMEM268
bta-miR-671	ENSBTAT00000000242	ENSBTAG00000000204	673	695	-19.43	aCCTTCGGAGACTCgagaagtac	x|||||||x:x|||xxxxxxxxx	aGGAAGCCCTGGAGgggctggag	TMEM268
bta-miR-671	ENSBTAT00000055284	ENSBTAG00000000204	781	803	-19.43	aCCTTCGGAGACTCgagaagtac	x|||||||x:x|||xxxxxxxxx	aGGAAGCCCTGGAGgggctggag	TMEM268
bta-miR-2335	ENSBTAT00000000242	ENSBTAG00000000204	785	806	-10.04	tCTATTACCGTTtcaggagccg	x|||||||x::|xxxxxxxxxx	aGATAATGATGActaactgaat	TMEM268
bta-miR-2335	ENSBTAT00000055284	ENSBTAG00000000204	893	914	-10.04	tCTATTACCGTTtcaggagccg	x|||||||x::|xxxxxxxxxx	aGATAATGATGActaactgaat	TMEM268
bta-miR-148a	ENSBTAT00000000244	ENSBTAG00000000205	89	110	-14.08	aGTCACGTCAACAGAAGAAAag	x|||||||x|xxxxxx||||xx	tCAGTGCACTACAGAACTTTgt	MMD
bta-miR-30e-5p	ENSBTAT00000000244	ENSBTAG00000000205	246	270	-16.13	aCATTTGTAGTCAACCGGTTcagag	x|||||||||xx|||x|:::xxxxx	tGTAAACATCC-TTGACTGGaagct	MMD
bta-miR-192	ENSBTAT00000000244	ENSBTAG00000000205	313	335	-15.99	gACTGGATCATTAAATCTTttta	x|||||||xx||||x|x|:xxxx	cTGACCTATGAATTGACAGccag	MMD
bta-miR-30a-5p	ENSBTAT00000000244	ENSBTAG00000000205	247	270	-16.08	aCATTTGTAGtcaaccggttcaga	x|||||||||xxxxxxxxxxxxxx	tGTAAACATCctcgactggaagct	MMD
bta-miR-497	ENSBTAT00000000244	ENSBTAG00000000205	696	714	-11.55	tTCGTCGT---ACCTTAAGTct	x|||||||xxx||x::||::xx	cAGCAGCACACTGTGGTTTGta	MMD
bta-miR-152	ENSBTAT00000000244	ENSBTAG00000000205	89	110	-13.08	aGTCACGTcaacagaagaaaag	x|||||||xxxxxxxxxxxxxx	tCAGTGCAtgacagaacttggg	MMD
bta-miR-182	ENSBTAT00000000244	ENSBTAG00000000205	626	649	-11.59	tAACCGTTAgagaggtacgaatta	x||||||||xxxxxxxxxxxxxxx	tTTGGCAATggtagaactcacact	MMD
bta-miR-30f	ENSBTAT00000000244	ENSBTAG00000000205	247	270	-11.47	aCATTTGTAGtcaaccggttcaga	x|||||||x|xxxxxxxxxxxxxx	tGTAAACACCctacactctcagct	MMD
bta-miR-769	ENSBTAT00000000244	ENSBTAG00000000205	5	23	-15.65	cCTCTGGA---TCATGTCTaac	x|||||||xxx:||x|x||xxx	tGAGACCTCCGGGTTCTGAgct	MMD
bta-miR-92b	ENSBTAT00000000244	ENSBTAG00000000205	335	356	-11.61	aTAACGTGActgaaaatgttag	x||||||||xxxxxxxxxxxxx	tATTGCACTcgtcccggcctcc	MMD
bta-miR-2370-5p	ENSBTAT00000000244	ENSBTAG00000000205	152	177	-11.56	cCCCTTTTAGGGTCTTGTGTCGAAag	x||||||||xxxx|||x::x|x||xx	tGGGAAAAT----GAAAGTTGGTTat	MMD
bta-miR-6535	ENSBTAT00000000244	ENSBTAG00000000205	160	180	-21.89	cTCCCCCTT-TTAGGGTCTTgt	x|||||||:x::|:xx||:|xx	tAGGGGGAGCGGTTGGAGGAct	MMD
bta-miR-10a	ENSBTAT00000000246	ENSBTAG00000000207	966	989	-16.01	gTGGGACACTAATGTAATAAGagt	x|||||||x:x|x|:xx|||:xxx	tACCCTGTAGATCCGA-ATTTgtg	PUDP
bta-let-7d	ENSBTAT00000000246	ENSBTAG00000000207	675	696	-12.74	aCTCCATCTTTTGtaagagctt	x|||||||x|:::xxxxxxxxx	aGAGGTAGTAGGTtgcatagtt	PUDP
bta-miR-200a	ENSBTAT00000000246	ENSBTAG00000000207	398	421	-14.66	tTTGTGACTTCTCCTATGTCATga	x|||||||xxx:|x|x||:x|:xx	tAACACTGTCTGGTA-ACGATGtt	PUDP
bta-let-7g	ENSBTAT00000000246	ENSBTAG00000000207	675	696	-14.84	aCTCCATCTTTtgtaagagctt	x|||||||x|:xxxxxxxxxxx	tGAGGTAGTAGtttgtacagtt	PUDP
bta-miR-10b	ENSBTAT00000000246	ENSBTAG00000000207	966	989	-14.54	gTGGGACACTAATGTAATAAGagt	x|||||||x|xx||xxx|||:xxx	tACCCTGT-AGAACCGAATTTgtg	PUDP
bta-let-7a-5p	ENSBTAT00000000246	ENSBTAG00000000207	675	696	-14.08	aCTCCATCTTTTGTAAGAGCtt	x|||||||x|:::xx|x|x|xx	tGAGGTAGTAGGTTGTATAGtt	PUDP
bta-let-7b	ENSBTAT00000000246	ENSBTAG00000000207	675	696	-16.34	aCTCCATCTTTTGTAAGAGCtt	x|||||||x|:::xx|x|x|xx	tGAGGTAGTAGGTTGTGTGGtt	PUDP
bta-let-7e	ENSBTAT00000000246	ENSBTAG00000000207	676	696	-17.89	aCTCCATCTTTTGTAAGAgct	x|||||||:|:::xx|x|xxx	tGAGGTAGGAGGTTGTATagt	PUDP
bta-miR-671	ENSBTAT00000000246	ENSBTAG00000000207	913	934	-18.36	tCCTTCGG-ACaacaagtcaacg	x|||||||x||xxxxxxxxxxxx	aGGAAGCCCTGgaggggctggag	PUDP
bta-miR-320a	ENSBTAT00000071475	ENSBTAG00000000210	1112	1134	-18.21	gTTTCGACGACAAGTCgttgcct	x|||||||xx|||x||xxxxxxx	aAAAGCTGG-GTTGAGagggcga	ARHGAP31
bta-let-7d	ENSBTAT00000071475	ENSBTAG00000000210	762	783	-18.09	aCTCCATCGGGAGTCGAGTCga	x|||||||:xxx:x||x:||xx	aGAGGTAGTAGGTTGCATAGtt	ARHGAP31
bta-let-7g	ENSBTAT00000071475	ENSBTAG00000000210	762	783	-20.84	aCTCCATCGGGAGTCGAGTCga	x|||||||:xx|:x|:x|||xx	tGAGGTAGTAGTTTGTACAGtt	ARHGAP31
bta-let-7a-5p	ENSBTAT00000071475	ENSBTAG00000000210	762	783	-18.99	aCTCCATCGGGAGTCGAGTCga	x|||||||:xxx:x|:x:||xx	tGAGGTAGTAGGTTGTATAGtt	ARHGAP31
bta-let-7b	ENSBTAT00000071475	ENSBTAG00000000210	762	783	-17.45	aCTCCATCGggagtcgagtcga	x|||||||:xxxxxxxxxxxxx	tGAGGTAGTaggttgtgtggtt	ARHGAP31
bta-let-7e	ENSBTAT00000071475	ENSBTAG00000000210	763	783	-16.37	aCTCCATCgggagtcgagtcg	x|||||||xxxxxxxxxxxxx	tGAGGTAGgaggttgtatagt	ARHGAP31
bta-miR-92b	ENSBTAT00000071475	ENSBTAG00000000210	651	672	-18.36	tTAACGTGGTCAGAGTCtcaga	x|||||||:x|||x|:|xxxxx	tATTGCACTCGTCCCGGcctcc	ARHGAP31
bta-miR-2332	ENSBTAT00000071475	ENSBTAG00000000210	272	295	-18.02	gCCAAATTC-GGGGTGTATAGTgac	x||||||||x:|:::x|x|x||xxx	cGGTTTAAGGTCTTGGAGA-CAaag	ARHGAP31
bta-miR-2335	ENSBTAT00000071475	ENSBTAG00000000210	302	323	-11.26	tCTATTACCGTTGccccctcac	x|||||||x::||xxxxxxxxx	aGATAATGATGACtaactgaat	ARHGAP31
bta-miR-10162-5p	ENSBTAT00000071475	ENSBTAG00000000210	579	601	-15.68	cCCTGTCCAGacgtccctaagtc	x|||||||x|xxxxxxxxxxxxx	tGGACAGGCCaagccgctgtgca	ARHGAP31
bta-miR-200a	ENSBTAT00000045065	ENSBTAG00000000215	1349	1371	-16.71	gTTGTGACCTGCGCGTGCcttgg	x|||||||xx:|xxx|||xxxxx	tAACACTGTCTGGTAACGatgtt	GNB1
bta-miR-425-5p	ENSBTAT00000045065	ENSBTAG00000000215	587	608	-11.48	cACTGTGCTctgccttcatttt	x||||||||xxxxxxxxxxxxx	aTGACACGAtcactcccgttga	GNB1
bta-miR-10162-5p	ENSBTAT00000045065	ENSBTAG00000000215	1525	1549	-20.62	cCCTGTCCCACGTCTCTCGAGATgt	x|||||||xxx||x:xx|||x|:xx	tGGACAGGC--CAAGCCGCTGTGca	GNB1
bta-miR-106a	ENSBTAT00000061477	ENSBTAG00000000222	126	149	-19.67	tTTTCACGTGAAT-TCACGGTTCag	x|||||||xx|||x|||||x|:|xx	aAAAGTGC--TTACAGTGC-AGGta	ARID4B
bta-miR-106a	ENSBTAT00000075576	ENSBTAG00000000222	126	149	-19.67	tTTTCACGTGAAT-TCACGGTTCag	x|||||||xx|||x|||||x|:|xx	aAAAGTGC--TTACAGTGC-AGGta	ARID4B
bta-miR-30e-5p	ENSBTAT00000075576	ENSBTAG00000000222	564	588	-10.6	aCATTTGTACAAGTCAGAaaaaatt	x||||||||xx|:x|x||xxxxxxx	tGTAAACATCCTT-GACTggaagct	ARID4B
bta-miR-425-5p	ENSBTAT00000075576	ENSBTAG00000000222	1340	1361	-11.91	gACTGTGCAAtcgtagatgttg	x|||||||x|xxxxxxxxxxxx	aTGACACGATcactcccgttga	ARID4B
bta-miR-30a-5p	ENSBTAT00000075576	ENSBTAG00000000222	564	588	-13.18	aCATTTGTACAAGTCAGAaaaaatt	x||||||||xx||x|x||xxxxxxx	tGTAAACATCCTC-GACTggaagct	ARID4B
bta-miR-30f	ENSBTAT00000075576	ENSBTAG00000000222	566	588	-10.72	aCATTTGTACAA-GTCAGAaaaaa	x|||||||xxx|x||x|||xxxxx	tGTAAACACCCTACACTCTcagct	ARID4B
bta-miR-11991	ENSBTAT00000061477	ENSBTAG00000000222	295	319	-18.12	tACAAGACCGGTGGGTTACTGATgc	x|||||||xx:|:|:xx|||:|:xx	aTGTTCTG--TATCT--TGATTGta	ARID4B
bta-miR-11991	ENSBTAT00000075576	ENSBTAG00000000222	295	319	-18.12	tACAAGACCGGTGGGTTACTGATgc	x|||||||xx:|:|:xx|||:|:xx	aTGTTCTG--TATCT--TGATTGta	ARID4B
bta-miR-320a	ENSBTAT00000046197	ENSBTAG00000000223	623	644	-18.06	gTTTCGACCTACTTATTATGta	x||||||||:|x:|x|:x:|xx	aAAAGCTGGGTTGAGAGGGCga	PPM1B
bta-miR-320a	ENSBTAT00000050064	ENSBTAG00000000223	1377	1398	-11.87	cTTTCGACATAAATTTACacac	x|||||||x:||x|:|x|xxxx	aAAAGCTGGGTTGAGAGGgcga	PPM1B
bta-miR-181b	ENSBTAT00000050064	ENSBTAG00000000223	1172	1194	-18.2	aTGTAAGTAACGA-AGaggagggg	x||||||||||||x||xxxxxxxx	aACATTCATTGCTGTCggtgggtt	PPM1B
bta-miR-181c	ENSBTAT00000050064	ENSBTAG00000000223	1171	1194	-10.7	aTGTAAGTaacgaagaggaggggg	x|||||||xxxxxxxxxxxxxxxx	aACATTCAacctgtcggtgagttt	PPM1B
bta-miR-144	ENSBTAT00000046197	ENSBTAG00000000223	321	343	-15	gTGTCATATTTCATTAGAacgat	x||||||||:|x|:||x|xxxxx	tACAGTATAGA-TGATGTactag	PPM1B
bta-miR-497	ENSBTAT00000031335	ENSBTAG00000000224	494	516	-20.32	tTCGTCGTCGGGACCCCtcccga	x|||||||x|x|||x||xxxxxx	cAGCAGCA-CACTGTGGtttgta	TSPAN15
bta-miR-497	ENSBTAT00000066626	ENSBTAG00000000224	494	516	-20.32	tTCGTCGTCGGGACCCCtcccga	x|||||||x|x|||x||xxxxxx	cAGCAGCA-CACTGTGGtttgta	TSPAN15
bta-miR-2408	ENSBTAT00000031335	ENSBTAG00000000224	372	391	-22.59	gTGCACACAGAGGAG-CGagg	x||||||||xxx|||x||xxx	cACGTGTGTGAGCTCAGCcgg	TSPAN15
bta-miR-2408	ENSBTAT00000066626	ENSBTAG00000000224	372	391	-22.59	gTGCACACAGAGGAG-CGagg	x||||||||xxx|||x||xxx	cACGTGTGTGAGCTCAGCcgg	TSPAN15
bta-miR-10162-5p	ENSBTAT00000031335	ENSBTAG00000000224	415	437	-22.97	tCCTGTCCccggcccctgccgtg	x|||||||xxxxxxxxxxxxxxx	tGGACAGGccaagccgctgtgca	TSPAN15
bta-miR-10162-5p	ENSBTAT00000066626	ENSBTAG00000000224	415	437	-22.97	tCCTGTCCccggcccctgccgtg	x|||||||xxxxxxxxxxxxxxx	tGGACAGGccaagccgctgtgca	TSPAN15
bta-miR-497	ENSBTAT00000000282	ENSBTAG00000000231	473	492	-21.06	tTCGTCGTG--ACACAGGGCtt	x||||||||xx||||x:::|xx	cAGCAGCACACTGTGGTTTGta	BMPR1A
bta-miR-143	ENSBTAT00000000282	ENSBTAG00000000231	1240	1262	-15.09	aCTCTACTACCGTAGAATTactt	x|||||||x|x||x:x||:xxxx	tGAGATGAAG-CACTGTAGctcg	BMPR1A
bta-miR-182	ENSBTAT00000000282	ENSBTAG00000000231	640	668	-14.56	tAACCGTTTAGAGCCAGTCTattacgtaa	x|||||||xxxx:|||x|||xxxxxxxxx	tTTGGCAA----TGGT-AGAactcacact	BMPR1A
bta-miR-183	ENSBTAT00000000282	ENSBTAG00000000231	489	513	-14.51	gTACCGTGTGATAGCATTTGGTtcg	x|||||||x:x:|x|x||x:||xxx	tATGGCAC-TGGTAG-AATTCActg	BMPR1A
bta-miR-2370-5p	ENSBTAT00000000282	ENSBTAG00000000231	1494	1515	-13.61	aCCCTTTTGTTccgtaggtagt	x|||||||::|xxxxxxxxxxx	tGGGAAAATGAaagttggttat	BMPR1A
bta-miR-10162-5p	ENSBTAT00000000282	ENSBTAG00000000231	826	848	-17.48	aCCTGTCCtacgaaaagtactgt	x|||||||xxxxxxxxxxxxxxx	tGGACAGGccaagccgctgtgca	BMPR1A
bta-miR-30e-5p	ENSBTAT00000000289	ENSBTAG00000000236	72	95	-12.66	gCATTTGTtttttgataaacaccc	x|||||||xxxxxxxxxxxxxxxx	tGTAAACAtccttgactggaagct	YWHAZ
bta-miR-200a	ENSBTAT00000000289	ENSBTAG00000000236	285	309	-14.79	aTTGTGACCGGGAACACTTCggtgt	x|||||||xx:||x||x|x|xxxxx	tAACACTG--TCTGGTAACGatgtt	YWHAZ
bta-miR-30a-5p	ENSBTAT00000000289	ENSBTAG00000000236	72	95	-11.96	gCATTTGTtttttgataaacaccc	x|||||||xxxxxxxxxxxxxxxx	tGTAAACAtcctcgactggaagct	YWHAZ
bta-miR-144	ENSBTAT00000000301	ENSBTAG00000000241	1056	1077	-15.31	tTGTCATATTTCGTGAGTtcct	x||||||||:|xx|:x:|xxxx	tACAGTATAGATGATGTActag	STAU1
bta-miR-497	ENSBTAT00000084104	ENSBTAG00000000245	643	664	-22.9	gTCGTCGTCTGGGACTCAATgt	x|||||||x||:x||:x||:xx	cAGCAGCACACTGTGGTTTGta	NHSL1
bta-miR-2303	ENSBTAT00000084104	ENSBTAG00000000245	281	303	-15.36	aGACTTACGTGTGTGTGTACgtg	x|||||||x|:::xx||x||xxx	tCTGAATG-ATGTCGAC-TGatg	NHSL1
bta-miR-2431-3p	ENSBTAT00000084104	ENSBTAG00000000245	500	523	-21.26	aTGGGGGTACACGAGTCTTGGtcg	x|||||||xx|||x:x||x||xxx	cACCCCCACTTGCAT-GACCCtga	NHSL1
bta-miR-3432a	ENSBTAT00000084104	ENSBTAG00000000245	78	99	-18.55	tCGCCCTAGTGCCCTGTTCCgt	x||||||||x:xx|x::x||xx	tGCGGGATCTTTAGTTGTGGtg	NHSL1
bta-miR-106a	ENSBTAT00000000316	ENSBTAG00000000252	1221	1242	-15.8	tTTTCACGAACCTCGTGgttta	x|||||||||xx||::|xxxxx	aAAAGTGCTTACAGTGCaggta	POLE3
bta-miR-30e-5p	ENSBTAT00000000316	ENSBTAG00000000252	267	290	-12.67	aCATTTGTtttctctagtttgact	x|||||||xxxxxxxxxxxxxxxx	tGTAAACAtccttgactggaagct	POLE3
bta-miR-30a-5p	ENSBTAT00000000316	ENSBTAG00000000252	267	290	-14.16	aCATTTGTtttctctagtttgact	x|||||||xxxxxxxxxxxxxxxx	tGTAAACAtcctcgactggaagct	POLE3
bta-miR-182	ENSBTAT00000000316	ENSBTAG00000000252	684	709	-13	tAACCGTTGGAACGAATTGATTaaga	x|||||||xx|x|:xx||||x|xxxx	tTTGGCAA--TGGTAGAACTCAcact	POLE3
bta-miR-193a-5p	ENSBTAT00000087086	ENSBTAG00000000253	562	582	-19.66	tCCCAGAACAGTC-GTCCTGac	x|||||||xx|:|x|:x||:xx	tGGGTCTTTGCGGGCGAGATga	PTPRF
bta-miR-193a-5p	ENSBTAT00000087285	ENSBTAG00000000253	562	582	-19.66	tCCCAGAACAGTC-GTCCTGac	x|||||||xx|:|x|:x||:xx	tGGGTCTTTGCGGGCGAGATga	PTPRF
bta-miR-200a	ENSBTAT00000087086	ENSBTAG00000000253	969	993	-18.67	gTTGTGACACGGTAGGACGTTACgg	x||||||||x:x:|xxxx|:|||xx	tAACACTGTCTGGTAA--CGATGtt	PTPRF
bta-miR-200a	ENSBTAT00000087285	ENSBTAG00000000253	969	993	-18.67	gTTGTGACACGGTAGGACGTTACgg	x||||||||x:x:|xxxx|:|||xx	tAACACTGTCTGGTAA--CGATGtt	PTPRF
bta-miR-1291	ENSBTAT00000087285	ENSBTAG00000000253	1052	1075	-20.79	aCCGGGACTccacacaccccgcac	x||||||||xxxxxxxxxxxxxxx	tGGCCCTGActgaagacctgcagt	PTPRF
bta-miR-2408	ENSBTAT00000087285	ENSBTAG00000000253	1112	1131	-19.12	cTGCACACGAT-GGTCCGGgt	x|||||||:x|x|:xx|||xx	cACGTGTGTGAGCTCAGCCgg	PTPRF
bta-miR-2431-3p	ENSBTAT00000087086	ENSBTAG00000000253	914	936	-20.65	tTGGGGGTCCGTGggtctcagtg	x|||||||xx::|xxxxxxxxxx	cACCCCCACTTGCatgaccctga	PTPRF
bta-miR-2431-3p	ENSBTAT00000087285	ENSBTAG00000000253	914	936	-20.65	tTGGGGGTCCGTGggtctcagtg	x|||||||xx::|xxxxxxxxxx	cACCCCCACTTGCatgaccctga	PTPRF
bta-miR-181b	ENSBTAT00000000325	ENSBTAG00000000260	530	553	-11.79		x|||||||xx|xx|||xxxxxxxxx	aACATTCATTGC-TGTcggtgggtt	ZNRF2
bta-miR-146b	ENSBTAT00000000325	ENSBTAG00000000260	343	366	-11.53	tCTCTTGAATTAtttttcatttag	x|||||||x|||xxxxxxxxxxxx	tGAGAACTGAATtccataggctgt	ZNRF2
bta-miR-574	ENSBTAT00000000325	ENSBTAG00000000260	90	113	-22.84	aCTCACACAGACGTAAAAACAaaa	x||||||||x||::|xxx|||xxx	tGAGTGTGTGTGTGTGAGTGTgtg	ZNRF2
bta-miR-148a	ENSBTAT00000000331	ENSBTAG00000000266	1550	1570	-14.5	tGTCACGTC-TGTaaagtagac	x|||||||xx|||xxxxxxxxx	tCAGTGCACTACAgaactttgt	NAB1
bta-miR-144	ENSBTAT00000000331	ENSBTAG00000000266	260	280	-13.03	aTGTCATAATTAA-ACATtcgg	x|||||||x:||xx||||xxxx	tACAGTATAGATGATGTActag	NAB1
bta-miR-144	ENSBTAT00000070724	ENSBTAG00000000266	260	280	-13.03	aTGTCATAATTAA-ACATtcgg	x|||||||x:||xx||||xxxx	tACAGTATAGATGATGTActag	NAB1
bta-miR-144	ENSBTAT00000082064	ENSBTAG00000000266	260	280	-13.03	aTGTCATAATTAA-ACATtcgg	x|||||||x:||xx||||xxxx	tACAGTATAGATGATGTActag	NAB1
bta-miR-152	ENSBTAT00000000331	ENSBTAG00000000266	1550	1570	-17.34	tGTCACGT-CTGTaaagtagac	x|||||||x||||xxxxxxxxx	tCAGTGCATGACAgaacttggg	NAB1
bta-miR-2303	ENSBTAT00000000331	ENSBTAG00000000266	82	101	-15.16	cGACTTACTCC-GTTGtaacc	x||||||||x|x|:||xxxxx	tCTGAATGATGTCGACtgatg	NAB1
bta-miR-2303	ENSBTAT00000070724	ENSBTAG00000000266	82	101	-15.16	cGACTTACTCC-GTTGtaacc	x||||||||x|x|:||xxxxx	tCTGAATGATGTCGACtgatg	NAB1
bta-miR-2303	ENSBTAT00000082064	ENSBTAG00000000266	82	101	-15.16	cGACTTACTCC-GTTGtaacc	x||||||||x|x|:||xxxxx	tCTGAATGATGTCGACtgatg	NAB1
bta-miR-2332	ENSBTAT00000000331	ENSBTAG00000000266	1402	1423	-17.47	cCCAAATTT-AGA-CCTCcttcct	x|||||||:x|||x||||xxxxxx	cGGTTTAAGGTCTTGGAGacaaag	NAB1
bta-miR-2370-5p	ENSBTAT00000000331	ENSBTAG00000000266	1665	1683	-11.37	tCCCTTTT---TTCGGAAAAtt	x|||||||xxx|||::xx||xx	tGGGAAAATGAAAGTTGGTTat	NAB1
bta-miR-6119-5p	ENSBTAT00000000331	ENSBTAG00000000266	2285	2307	-20.36	aCTCCATTGGTTAACTGGAacaa	x|||||||xx||||||::|xxxx	aGAGGTAAAAAATTGATTTgact	NAB1
bta-miR-31	ENSBTAT00000000333	ENSBTAG00000000267	778	798	-12.41	aCCGTTCTttaaagcacttcg	x|||||||xxxxxxxxxxxxx	aGGCAAGAtgctggcatagct	SMG6
bta-miR-10a	ENSBTAT00000000333	ENSBTAG00000000267	1212	1235	-17.19	tTGGGACAGAAGGGGATTCAGaag	x|||||||xxx:||xx||x|:xxx	tACCCTGTAGATCCG-AATTTgtg	SMG6
bta-miR-10b	ENSBTAT00000000333	ENSBTAG00000000267	1213	1235	-16.13	tTGGGACAgaaggggattcagaa	x|||||||xxxxxxxxxxxxxxx	tACCCTGTagaaccgaatttgtg	SMG6
bta-miR-6119-3p	ENSBTAT00000000333	ENSBTAG00000000267	1380	1405	-20.13	aGTTTAGTGACCGACACCGAGAGGac	x|||||||:|xxx|x|xx||||||xx	gCAAATCATT---TTTTACTCTCCaa	SMG6
bta-miR-6535	ENSBTAT00000000333	ENSBTAG00000000267	814	836	-28.53	tTCCCCCTA-CCAAGTCCTCCctc	x|||||||xx||||xx|||||xxx	tAGGGGGAGCGGTT--GGAGGact	SMG6
bta-miR-10162-5p	ENSBTAT00000000333	ENSBTAG00000000267	287	309	-15.51	aCCTGTCCCCCTCcctctttccg	x|||||||xxx||xxxxxxxxxx	tGGACAGGCCAAGccgctgtgca	SMG6
bta-miR-10a	ENSBTAT00000000341	ENSBTAG00000000274	263	286	-22.26	tTGGGACATCGTAGatacctcagt	x|||||||||x|||xxxxxxxxxx	tACCCTGTAG-ATCcgaatttgtg	YKT6
bta-miR-10b	ENSBTAT00000000341	ENSBTAG00000000274	264	286	-22.26	tTGGGACATCGTAGATacctcag	x|||||||||x|x|x|xxxxxxx	tACCCTGTAGAACCGAatttgtg	YKT6
bta-miR-2431-3p	ENSBTAT00000000341	ENSBTAG00000000274	143	168	-28.25	gTGGGGGTCCAGGGGTAGGTGGGAag	x|||||||xx|x|xx||xx|||||xx	cACCCCCACTTGC--ATG-ACCCTga	YKT6
bta-miR-574	ENSBTAT00000000341	ENSBTAG00000000274	864	887	-13.05	cCTCACACCTGTCGAGTCtggtgt	x|||||||x:::xx|x||xxxxxx	tGAGTGTGTGTGTGTGAGtgtgtg	YKT6
bta-miR-148a	ENSBTAT00000000348	ENSBTAG00000000279	433	454	-11.41	cGTCACGTCCTACCCTAAccac	x|||||||xx|xx|x|x|xxxx	tCAGTGCACTACAGAACTttgt	RAB26
bta-miR-10a	ENSBTAT00000000348	ENSBTAG00000000279	498	520	-16.85	cTGGGACAACTACACCTTGGCcc	x|||||||x|||xx|x|x::|xx	tACCCTGTAGATCCGAATTTGtg	RAB26
bta-miR-200a	ENSBTAT00000000348	ENSBTAG00000000279	550	572	-12.6	cTTGTGACGCAATGTTTCggtat	x|||||||:x|x::||x|xxxxx	tAACACTGTCTGGTAACGatgtt	RAB26
bta-miR-10b	ENSBTAT00000000348	ENSBTAG00000000279	498	520	-19.08	cTGGGACAACTACACCTTGGCcc	x|||||||x||xxx|x|x::|xx	tACCCTGTAGAACCGAATTTGtg	RAB26
bta-miR-497	ENSBTAT00000000348	ENSBTAG00000000279	151	172	-20.76	gTCGTCGTCCACTTCCTGACgt	x|||||||xxxx:x||x:||xx	cAGCAGCACACTGTGGTTTGta	RAB26
bta-miR-152	ENSBTAT00000000348	ENSBTAG00000000279	434	454	-16.47	cGTCACGTCCTACCCT-AACca	x|||||||x||xx|x|x|||xx	tCAGTGCATGACAGAACTTGgg	RAB26
bta-miR-148a	ENSBTAT00000000353	ENSBTAG00000000283	563	584	-18.28	aGTCACGTCTGGTCGTccgggt	x|||||||xxx|||x|xxxxxx	tCAGTGCACTACAGAActttgt	CSF1
bta-miR-148a	ENSBTAT00000076179	ENSBTAG00000000283	447	468	-18.28	aGTCACGTCTGGTCGTccgggt	x|||||||xxx|||x|xxxxxx	tCAGTGCACTACAGAActttgt	CSF1
bta-miR-106a	ENSBTAT00000000353	ENSBTAG00000000283	1063	1082	-16.45	gTTTCACG--TTCTACGTCTtt	x|||||||xx|xx:|||||:xx	aAAAGTGCTTACAGTGCAGGta	CSF1
bta-miR-106a	ENSBTAT00000076179	ENSBTAG00000000283	947	966	-16.45	gTTTCACG--TTCTACGTCTtt	x|||||||xx|xx:|||||:xx	aAAAGTGCTTACAGTGCAGGta	CSF1
bta-miR-497	ENSBTAT00000000353	ENSBTAG00000000283	1550	1571	-11.96	cTCGTCGTCTtctcctccctgt	x|||||||x|xxxxxxxxxxxx	cAGCAGCACActgtggtttgta	CSF1
bta-miR-497	ENSBTAT00000076179	ENSBTAG00000000283	1434	1455	-11.96	cTCGTCGTCTtctcctccctgt	x|||||||x|xxxxxxxxxxxx	cAGCAGCACActgtggtttgta	CSF1
bta-miR-143	ENSBTAT00000000353	ENSBTAG00000000283	1371	1392	-12.45	tCTCTACTACGATCAC-TCccca	x|||||||x||x|x||x||xxxx	tGAGATGAAGC-ACTGTAGctcg	CSF1
bta-miR-143	ENSBTAT00000076179	ENSBTAG00000000283	1255	1276	-12.45	tCTCTACTACGATCAC-TCccca	x|||||||x||x|x||x||xxxx	tGAGATGAAGC-ACTGTAGctcg	CSF1
bta-miR-152	ENSBTAT00000000353	ENSBTAG00000000283	563	584	-20.83	aGTCACGTCTGGTCGTccgggt	x|||||||x:x|||x|xxxxxx	tCAGTGCATGACAGAActtggg	CSF1
bta-miR-152	ENSBTAT00000076179	ENSBTAG00000000283	447	468	-20.83	aGTCACGTCTGGTCGTccgggt	x|||||||x:x|||x|xxxxxx	tCAGTGCATGACAGAActtggg	CSF1
bta-miR-1291	ENSBTAT00000000353	ENSBTAG00000000283	122	148	-32.64	aCCGGGACGAGAGGGCTCAGGTCCTcg	x|||||||xxxx|:xx||x||x|x|xx	tGGCCCTGA---CTGAAGACCTGCAgt	CSF1
bta-miR-1291	ENSBTAT00000076179	ENSBTAG00000000283	6	32	-32.64	aCCGGGACGAGAGGGCTCAGGTCCTcg	x|||||||xxxx|:xx||x||x|x|xx	tGGCCCTGA---CTGAAGACCTGCAgt	CSF1
bta-miR-10162-5p	ENSBTAT00000000353	ENSBTAG00000000283	1241	1263	-24.4	aCCTGTCCCTTTCTCCGGTcggc	x|||||||xx|||xx||::xxxx	tGGACAGGCCAAGCCGCTGtgca	CSF1
bta-miR-10162-5p	ENSBTAT00000076179	ENSBTAG00000000283	1125	1147	-24.4	aCCTGTCCCTTTCTCCGGTcggc	x|||||||xx|||xx||::xxxx	tGGACAGGCCAAGCCGCTGtgca	CSF1
bta-miR-106a	ENSBTAT00000000357	ENSBTAG00000000287	615	635	-14.86	tTTTCACGATT-TCTTCTGCca	x||||||||x|x||x:x|x|xx	aAAAGTGCTTACAGTGCAGGta	GNPDA2
bta-miR-144	ENSBTAT00000000357	ENSBTAG00000000287	795	815	-11.76	aTGTCATATATA-TCCATtcct	x||||||||x||x|x|||xxxx	tACAGTATAGATGATGTActag	GNPDA2
bta-miR-2332	ENSBTAT00000000357	ENSBTAG00000000287	747	775	-12	tCCAAATTATTAAAAAGAATTTTTTTTaa	x|||||||x:xxxxx||||::|:|x||xx	cGGTTTAAGG-----TCTTGGAGACAAag	GNPDA2
bta-miR-11991	ENSBTAT00000000357	ENSBTAG00000000287	23	43	-10.72	cACAAGACAAGTAAGTtcgtc	x||||||||x:x||x|xxxxx	aTGTTCTGTATCTTGAttgta	GNPDA2
bta-miR-2370-5p	ENSBTAT00000075557	ENSBTAG00000000288	931	952	-10.83	cCCCTTTTGTTTTgttttgttt	x|||||||::|||xxxxxxxxx	tGGGAAAATGAAAgttggttat	UPF2
bta-miR-6119-3p	ENSBTAT00000061493	ENSBTAG00000000288	380	403	-13.22	aGTTTAGTTCAAATTTGAGttcaa	x|||||||xx|||x|x|||xxxxx	gCAAATCATTTTTTA-CTCtccaa	UPF2
bta-miR-6119-3p	ENSBTAT00000075557	ENSBTAG00000000288	380	403	-13.22	aGTTTAGTTCAAATTTGAGttcaa	x|||||||xx|||x|x|||xxxxx	gCAAATCATTTTTTA-CTCtccaa	UPF2
bta-miR-11991	ENSBTAT00000061493	ENSBTAG00000000288	732	751	-11.19	gACAAGAC-TCGACCacagtc	x|||||||x|x||x|xxxxxx	aTGTTCTGTATCTTGattgta	UPF2
bta-miR-11991	ENSBTAT00000075557	ENSBTAG00000000288	732	751	-11.19	gACAAGAC-TCGACCacagtc	x|||||||x|x||x|xxxxxx	aTGTTCTGTATCTTGattgta	UPF2
bta-miR-497	ENSBTAT00000000361	ENSBTAG00000000289	621	642	-16.85	gTCGTCGTTCTATTAGAAAgat	x|||||||xxx|:xxx|||xxx	cAGCAGCACACTGTGGTTTgta	ASB8
bta-miR-497	ENSBTAT00000068209	ENSBTAG00000000289	621	642	-16.85	gTCGTCGTTCTATTAGAAAgat	x|||||||xxx|:xxx|||xxx	cAGCAGCACACTGTGGTTTgta	ASB8
bta-miR-769	ENSBTAT00000000361	ENSBTAG00000000289	233	254	-18.52	cCTCTGGAGaaggaaacgtccc	x||||||||xxxxxxxxxxxxx	tGAGACCTCcgggttctgagct	ASB8
bta-miR-769	ENSBTAT00000068209	ENSBTAG00000000289	233	254	-18.52	cCTCTGGAGaaggaaacgtccc	x||||||||xxxxxxxxxxxxx	tGAGACCTCcgggttctgagct	ASB8
bta-miR-31	ENSBTAT00000000364	ENSBTAG00000000291	905	925	-15.05	gCCGTTCTAATTCCccctgtt	x||||||||xxx||xxxxxxx	aGGCAAGATGCTGGcatagct	DHTKD1
bta-miR-31	ENSBTAT00000070859	ENSBTAG00000000291	905	925	-15.05	gCCGTTCTAATTCCccctgtt	x||||||||xxx||xxxxxxx	aGGCAAGATGCTGGcatagct	DHTKD1
bta-miR-31	ENSBTAT00000078440	ENSBTAG00000000291	905	925	-15.05	gCCGTTCTAATTCCccctgtt	x||||||||xxx||xxxxxxx	aGGCAAGATGCTGGcatagct	DHTKD1
bta-miR-31	ENSBTAT00000079686	ENSBTAG00000000291	905	925	-15.05	gCCGTTCTAATTCCccctgtt	x||||||||xxx||xxxxxxx	aGGCAAGATGCTGGcatagct	DHTKD1
bta-miR-10a	ENSBTAT00000079686	ENSBTAG00000000291	1462	1483	-11.5	cTGGGACA-CGAAAATAAAAaaa	x|||||||x|x|xxx|x|||xxx	tACCCTGTAGATCCGAATTTgtg	DHTKD1
bta-miR-181b	ENSBTAT00000000364	ENSBTAG00000000291	1374	1397	-11.93	cTGTAAGTACCATGATTCAatgta	x||||||||x|xxx|x:||xxxxx	aACATTCATTGCTGTCGGTgggtt	DHTKD1
bta-miR-181b	ENSBTAT00000070859	ENSBTAG00000000291	1374	1397	-11.93	cTGTAAGTACCATGATTCAatgta	x||||||||x|xxx|x:||xxxxx	aACATTCATTGCTGTCGGTgggtt	DHTKD1
bta-miR-181b	ENSBTAT00000078440	ENSBTAG00000000291	1374	1397	-11.93	cTGTAAGTACCATGATTCAatgta	x||||||||x|xxx|x:||xxxxx	aACATTCATTGCTGTCGGTgggtt	DHTKD1
bta-miR-181b	ENSBTAT00000079686	ENSBTAG00000000291	1374	1397	-11.93	cTGTAAGTACCATGATTCAatgta	x||||||||x|xxx|x:||xxxxx	aACATTCATTGCTGTCGGTgggtt	DHTKD1
bta-miR-193a-5p	ENSBTAT00000000364	ENSBTAG00000000291	504	527	-17.33	cCCCAGAAGGGGACAAGGTCTcga	x|||||||:x|xx|xx|x|||xxx	tGGGTCTTTGCGGG--CGAGAtga	DHTKD1
bta-miR-193a-5p	ENSBTAT00000070859	ENSBTAG00000000291	504	527	-17.33	cCCCAGAAGGGGACAAGGTCTcga	x|||||||:x|xx|xx|x|||xxx	tGGGTCTTTGCGGG--CGAGAtga	DHTKD1
bta-miR-193a-5p	ENSBTAT00000078440	ENSBTAG00000000291	504	527	-17.33	cCCCAGAAGGGGACAAGGTCTcga	x|||||||:x|xx|xx|x|||xxx	tGGGTCTTTGCGGG--CGAGAtga	DHTKD1
bta-miR-193a-5p	ENSBTAT00000079686	ENSBTAG00000000291	504	527	-17.33	cCCCAGAAGGGGACAAGGTCTcga	x|||||||:x|xx|xx|x|||xxx	tGGGTCTTTGCGGG--CGAGAtga	DHTKD1
bta-miR-181c	ENSBTAT00000000364	ENSBTAG00000000291	1377	1397	-11.8	cTGTAAGT---ACCATGATTCAat	x|||||||xxx||xx:x|:|||xx	aACATTCAACCTGTCGGTGAGTtt	DHTKD1
bta-miR-181c	ENSBTAT00000070859	ENSBTAG00000000291	1377	1397	-11.8	cTGTAAGT---ACCATGATTCAat	x|||||||xxx||xx:x|:|||xx	aACATTCAACCTGTCGGTGAGTtt	DHTKD1
bta-miR-181c	ENSBTAT00000078440	ENSBTAG00000000291	1377	1397	-11.8	cTGTAAGT---ACCATGATTCAat	x|||||||xxx||xx:x|:|||xx	aACATTCAACCTGTCGGTGAGTtt	DHTKD1
bta-miR-181c	ENSBTAT00000079686	ENSBTAG00000000291	1377	1397	-11.8	cTGTAAGT---ACCATGATTCAat	x|||||||xxx||xx:x|:|||xx	aACATTCAACCTGTCGGTGAGTtt	DHTKD1
bta-miR-200a	ENSBTAT00000000364	ENSBTAG00000000291	1059	1081	-14.58	aTTGTGACCCTTCAaggacgata	x|||||||xxx:||xxxxxxxxx	tAACACTGTCTGGTaacgatgtt	DHTKD1
bta-miR-200a	ENSBTAT00000070859	ENSBTAG00000000291	1059	1081	-14.58	aTTGTGACCCTTCAaggacgata	x|||||||xxx:||xxxxxxxxx	tAACACTGTCTGGTaacgatgtt	DHTKD1
bta-miR-200a	ENSBTAT00000078440	ENSBTAG00000000291	1059	1081	-14.58	aTTGTGACCCTTCAaggacgata	x|||||||xxx:||xxxxxxxxx	tAACACTGTCTGGTaacgatgtt	DHTKD1
bta-miR-200a	ENSBTAT00000079686	ENSBTAG00000000291	1059	1081	-14.58	aTTGTGACCCTTCAaggacgata	x|||||||xxx:||xxxxxxxxx	tAACACTGTCTGGTaacgatgtt	DHTKD1
bta-miR-10b	ENSBTAT00000079686	ENSBTAG00000000291	1461	1483	-11.5	cTGGGACAcgaaaataaaaaaaa	x|||||||xxxxxxxxxxxxxxx	tACCCTGTagaaccgaatttgtg	DHTKD1
bta-miR-342	ENSBTAT00000000364	ENSBTAG00000000291	547	569	-11.72	cGAGTGTGA-TATA-CGgacccaca	x|||||||xx|x||x||xxxxxxxx	tCTCACACAGAAATCGCacccatct	DHTKD1
bta-miR-342	ENSBTAT00000070859	ENSBTAG00000000291	547	569	-11.72	cGAGTGTGA-TATA-CGgacccaca	x|||||||xx|x||x||xxxxxxxx	tCTCACACAGAAATCGCacccatct	DHTKD1
bta-miR-342	ENSBTAT00000078440	ENSBTAG00000000291	547	569	-11.72	cGAGTGTGA-TATA-CGgacccaca	x|||||||xx|x||x||xxxxxxxx	tCTCACACAGAAATCGCacccatct	DHTKD1
bta-miR-342	ENSBTAT00000079686	ENSBTAG00000000291	547	569	-11.72	cGAGTGTGA-TATA-CGgacccaca	x|||||||xx|x||x||xxxxxxxx	tCTCACACAGAAATCGCacccatct	DHTKD1
bta-miR-497	ENSBTAT00000000364	ENSBTAG00000000291	674	694	-15.9	tTCGTCGTG-GTCTCTActgta	x||||||||x|x|x|:|xxxxx	cAGCAGCACACTGTGGTttgta	DHTKD1
bta-miR-497	ENSBTAT00000070859	ENSBTAG00000000291	674	694	-15.9	tTCGTCGTG-GTCTCTActgta	x||||||||x|x|x|:|xxxxx	cAGCAGCACACTGTGGTttgta	DHTKD1
bta-miR-497	ENSBTAT00000078440	ENSBTAG00000000291	674	694	-15.9	tTCGTCGTG-GTCTCTActgta	x||||||||x|x|x|:|xxxxx	cAGCAGCACACTGTGGTttgta	DHTKD1
bta-miR-497	ENSBTAT00000079686	ENSBTAG00000000291	674	694	-15.9	tTCGTCGTG-GTCTCTActgta	x||||||||x|x|x|:|xxxxx	cAGCAGCACACTGTGGTttgta	DHTKD1
bta-miR-144	ENSBTAT00000000364	ENSBTAG00000000291	1219	1239	-14.35	tTGTCATAA-TACCGTGTtctt	x|||||||xx|||x:::|xxxx	tACAGTATAGATGATGTActag	DHTKD1
bta-miR-144	ENSBTAT00000070859	ENSBTAG00000000291	1219	1239	-14.35	tTGTCATAA-TACCGTGTtctt	x|||||||xx|||x:::|xxxx	tACAGTATAGATGATGTActag	DHTKD1
bta-miR-144	ENSBTAT00000078440	ENSBTAG00000000291	1219	1239	-14.35	tTGTCATAA-TACCGTGTtctt	x|||||||xx|||x:::|xxxx	tACAGTATAGATGATGTActag	DHTKD1
bta-miR-144	ENSBTAT00000079686	ENSBTAG00000000291	1219	1239	-14.35	tTGTCATAA-TACCGTGTtctt	x|||||||xx|||x:::|xxxx	tACAGTATAGATGATGTActag	DHTKD1
bta-miR-146b	ENSBTAT00000079686	ENSBTAG00000000291	1717	1741	-19.04	cCTCTTGATTGTCAGGGAaggacgt	x|||||||:|x|x|||x|xxxxxxx	tGAGAACTGA-ATTCCATaggctgt	DHTKD1
bta-miR-183	ENSBTAT00000000364	ENSBTAG00000000291	1209	1231	-16.78	aTACCGTGTTCTTaccatatacc	x|||||||x:|x|xxxxxxxxxx	tATGGCACTGGTAgaattcactg	DHTKD1
bta-miR-183	ENSBTAT00000070859	ENSBTAG00000000291	1209	1231	-16.78	aTACCGTGTTCTTaccatatacc	x|||||||x:|x|xxxxxxxxxx	tATGGCACTGGTAgaattcactg	DHTKD1
bta-miR-183	ENSBTAT00000078440	ENSBTAG00000000291	1209	1231	-16.78	aTACCGTGTTCTTaccatatacc	x|||||||x:|x|xxxxxxxxxx	tATGGCACTGGTAgaattcactg	DHTKD1
bta-miR-183	ENSBTAT00000079686	ENSBTAG00000000291	1209	1231	-16.78	aTACCGTGTTCTTaccatatacc	x|||||||x:|x|xxxxxxxxxx	tATGGCACTGGTAgaattcactg	DHTKD1
bta-miR-6119-3p	ENSBTAT00000000364	ENSBTAG00000000291	411	433	-15.23	cGTTTAGTGAAGtcggtacagtc	x|||||||:||:xxxxxxxxxxx	gCAAATCATTTTttactctccaa	DHTKD1
bta-miR-6119-3p	ENSBTAT00000070859	ENSBTAG00000000291	411	433	-15.23	cGTTTAGTGAAGtcggtacagtc	x|||||||:||:xxxxxxxxxxx	gCAAATCATTTTttactctccaa	DHTKD1
bta-miR-6119-3p	ENSBTAT00000078440	ENSBTAG00000000291	411	433	-15.23	cGTTTAGTGAAGtcggtacagtc	x|||||||:||:xxxxxxxxxxx	gCAAATCATTTTttactctccaa	DHTKD1
bta-miR-6119-3p	ENSBTAT00000079686	ENSBTAG00000000291	411	433	-15.23	cGTTTAGTGAAGtcggtacagtc	x|||||||:||:xxxxxxxxxxx	gCAAATCATTTTttactctccaa	DHTKD1
bta-miR-6535	ENSBTAT00000000364	ENSBTAG00000000291	897	915	-20.45	tTCCCCCT-GTT--TTTTCTat	x|||||||x|::xx::|:||xx	tAGGGGGAGCGGTTGGAGGAct	DHTKD1
bta-miR-6535	ENSBTAT00000070859	ENSBTAG00000000291	897	915	-20.45	tTCCCCCT-GTT--TTTTCTat	x|||||||x|::xx::|:||xx	tAGGGGGAGCGGTTGGAGGAct	DHTKD1
bta-miR-6535	ENSBTAT00000078440	ENSBTAG00000000291	897	915	-20.45	tTCCCCCT-GTT--TTTTCTat	x|||||||x|::xx::|:||xx	tAGGGGGAGCGGTTGGAGGAct	DHTKD1
bta-miR-6535	ENSBTAT00000079686	ENSBTAG00000000291	897	915	-20.45	tTCCCCCT-GTT--TTTTCTat	x|||||||x|::xx::|:||xx	tAGGGGGAGCGGTTGGAGGAct	DHTKD1
bta-miR-148a	ENSBTAT00000000374	ENSBTAG00000000296	84	107	-14.67	cGTCACGTTCAGACTCCTGAcgag	x|||||||xxx|x||xx|||xxxx	tCAGTGCACTACAGA--ACTttgt	IMPDH1
bta-miR-148a	ENSBTAT00000085598	ENSBTAG00000000296	84	107	-14.67	cGTCACGTTCAGACTCCTGAcgag	x|||||||xxx|x||xx|||xxxx	tCAGTGCACTACAGA--ACTttgt	IMPDH1
bta-miR-497	ENSBTAT00000000374	ENSBTAG00000000296	92	112	-15.55	tTCGTCGTC--ACGTTCAGACtc	x|||||||xxx||::x||:||xx	cAGCAGCACACTGTG-GTTTGta	IMPDH1
bta-miR-497	ENSBTAT00000085598	ENSBTAG00000000296	92	112	-15.55	tTCGTCGTC--ACGTTCAGACtc	x|||||||xxx||::x||:||xx	cAGCAGCACACTGTG-GTTTGta	IMPDH1
bta-miR-152	ENSBTAT00000000374	ENSBTAG00000000296	84	107	-13.9	cGTCACGTTCAGACTCCTGAcgag	x|||||||x|x|x||xx|||xxxx	tCAGTGCATGACAGA--ACTtggg	IMPDH1
bta-miR-152	ENSBTAT00000085598	ENSBTAG00000000296	84	107	-13.9	cGTCACGTTCAGACTCCTGAcgag	x|||||||x|x|x||xx|||xxxx	tCAGTGCATGACAGA--ACTtggg	IMPDH1
bta-miR-6535	ENSBTAT00000000374	ENSBTAG00000000296	168	187	-27.19	gTCCCCCTC--CGGGTTCCTtc	x||||||||xx|::x:||||xx	tAGGGGGAGCGGTTGGAGGAct	IMPDH1
bta-miR-6535	ENSBTAT00000085598	ENSBTAG00000000296	168	187	-27.19	gTCCCCCTC--CGGGTTCCTtc	x||||||||xx|::x:||||xx	tAGGGGGAGCGGTTGGAGGAct	IMPDH1
bta-miR-143	ENSBTAT00000000389	ENSBTAG00000000305	19	40	-21.97	aCTCTACTTCCGTG-CGTaagac	x|||||||||x|||x|:|xxxxx	tGAGATGAAG-CACTGTAgctcg	LMO4
bta-miR-200a	ENSBTAT00000000410	ENSBTAG00000000312	239	261	-14.32	gTTGTGACCCACCCGTCCTCCcc	x|||||||xx|||xx|x||x|xx	tAACACTGTCTGGTAACGATGtt	GRINA
bta-miR-200a	ENSBTAT00000084417	ENSBTAG00000000312	239	261	-14.32	gTTGTGACCCACCCGTCCTCCcc	x|||||||xx|||xx|x||x|xx	tAACACTGTCTGGTAACGATGtt	GRINA
bta-miR-769	ENSBTAT00000000410	ENSBTAG00000000312	426	447	-19.8	gCTCTGGAaatggggcgtccag	x|||||||xxxxxxxxxxxxxx	tGAGACCTccgggttctgagct	GRINA
bta-miR-769	ENSBTAT00000084417	ENSBTAG00000000312	426	447	-19.8	gCTCTGGAaatggggcgtccag	x|||||||xxxxxxxxxxxxxx	tGAGACCTccgggttctgagct	GRINA
bta-miR-1291	ENSBTAT00000000410	ENSBTAG00000000312	273	295	-20.41	tCCGGGACCTCAC--CCGACCGTct	x|||||||x|x||xx|x|xx|||xx	tGGCCCTG-ACTGAAGACCTGCAgt	GRINA
bta-miR-1291	ENSBTAT00000084417	ENSBTAG00000000312	273	295	-20.41	tCCGGGACCTCAC--CCGACCGTct	x|||||||x|x||xx|x|xx|||xx	tGGCCCTG-ACTGAAGACCTGCAgt	GRINA
bta-miR-10162-5p	ENSBTAT00000000410	ENSBTAG00000000312	344	366	-20.26	cCCTGTCCtcccctctgcacgtg	x|||||||xxxxxxxxxxxxxxx	tGGACAGGccaagccgctgtgca	GRINA
bta-miR-10162-5p	ENSBTAT00000084417	ENSBTAG00000000312	344	366	-20.26	cCCTGTCCtcccctctgcacgtg	x|||||||xxxxxxxxxxxxxxx	tGGACAGGccaagccgctgtgca	GRINA
bta-miR-183	ENSBTAT00000000419	ENSBTAG00000000317	744	766	-16.63	tTACCGTGAAATTATCAACTccg	x||||||||xxx|x|x||x|xxx	tATGGCACTGGTAGAATTCActg	MAPK8IP1
bta-miR-183	ENSBTAT00000067916	ENSBTAG00000000317	744	766	-16.63	tTACCGTGAAATTATCAACTccg	x||||||||xxx|x|x||x|xxx	tATGGCACTGGTAGAATTCActg	MAPK8IP1
bta-miR-1291	ENSBTAT00000000419	ENSBTAG00000000317	21	44	-24.52	aCCGGGACCGGgcccccacgctcc	x|||||||x|:xxxxxxxxxxxxx	tGGCCCTGACTgaagacctgcagt	MAPK8IP1
bta-miR-1291	ENSBTAT00000067916	ENSBTAG00000000317	21	44	-24.52	aCCGGGACCGGgcccccacgctcc	x|||||||x|:xxxxxxxxxxxxx	tGGCCCTGACTgaagacctgcagt	MAPK8IP1
bta-miR-2431-3p	ENSBTAT00000000419	ENSBTAG00000000317	591	611	-20.9	cTGGGGGTG--CGGACGGtcccc	x||||||||xx||x||x|xxxxx	cACCCCCACTTGCATGACcctga	MAPK8IP1
bta-miR-2431-3p	ENSBTAT00000067916	ENSBTAG00000000317	591	611	-20.9	cTGGGGGTG--CGGACGGtcccc	x||||||||xx||x||x|xxxxx	cACCCCCACTTGCATGACcctga	MAPK8IP1
bta-miR-497	ENSBTAT00000076606	ENSBTAG00000000320	376	394	-19.19	tTCGTCGTG--AC-TCAGACcg	x||||||||xx||x:||:||xx	cAGCAGCACACTGTGGTTTGta	UBAP1
bta-miR-146b	ENSBTAT00000076606	ENSBTAG00000000320	766	792	-19.89	cCTCTTGACTCCACCTCAATCACGAcc	x|||||||||xx|xx|xx|||x|||xx	tGAGAACTGAATTCCA--TAG-GCTgt	UBAP1
bta-miR-182	ENSBTAT00000076606	ENSBTAG00000000320	122	145	-22.13	gAACCGTTCGTGTCAGAGGTGTgg	x|||||||xx::||xxx:||||xx	tTTGGCAATGGTAGAACTCACAct	UBAP1
bta-miR-92b	ENSBTAT00000076606	ENSBTAG00000000320	436	457	-18.19	tTAACGTGAGTTGAACCtaatc	x|||||||||:x|xx||xxxxx	tATTGCACTCGTCCCGGcctcc	UBAP1
bta-miR-2370-5p	ENSBTAT00000076606	ENSBTAG00000000320	465	489	-13.87	cCCCTTTTTTGTTTTGGGACCttct	x|||||||x:x|||::xx|||xxxx	tGGGAAAATG-AAAGT--TGGttat	UBAP1
bta-miR-2431-3p	ENSBTAT00000076606	ENSBTAG00000000320	91	113	-18.09	gTGGGGGTTTTCTTTTAGGcctt	x|||||||xxx|x|x:x||xxxx	cACCCCCACTTGCATGACCctga	UBAP1
bta-miR-2370-5p	ENSBTAT00000000422	ENSBTAG00000000321	121	142	-13.12	cCCCTTTTCCTCTCtcttcgac	x|||||||x||x||xxxxxxxx	tGGGAAAATGAAAGttggttat	TBL2
bta-miR-181b	ENSBTAT00000073351	ENSBTAG00000000322	2268	2293	-15.77	gTGTAAGTGATTGTTAAACCGTTact	x|||||||:|:x::xx|x||:::xxx	aACATTCATTGCTG--TCGGTGGgtt	CD2AP
bta-miR-30e-5p	ENSBTAT00000073351	ENSBTAG00000000322	2861	2886	-12.7	aCATTTGTTCAGTCACTtcatatgac	x|||||||xx||xx|||xxxxxxxxx	tGTAAACA--TCCTTGActggaagct	CD2AP
bta-miR-181c	ENSBTAT00000073351	ENSBTAG00000000322	2272	2293	-11.11	gTGTAAGT--GATTGTTAaaccgt	x|||||||xx||:x|::|xxxxxx	aACATTCAACCTGTCGGTgagttt	CD2AP
bta-miR-200a	ENSBTAT00000061046	ENSBTAG00000000322	2	24	-13.99	cTTGTGACCCACgggcagtggag	x|||||||xx||xxxxxxxxxxx	tAACACTGTCTGgtaacgatgtt	CD2AP
bta-miR-200a	ENSBTAT00000073351	ENSBTAG00000000322	2	24	-13.99	cTTGTGACCCACgggcagtggag	x|||||||xx||xxxxxxxxxxx	tAACACTGTCTGgtaacgatgtt	CD2AP
bta-miR-200a	ENSBTAT00000075454	ENSBTAG00000000322	2	24	-13.99	cTTGTGACCCACgggcagtggag	x|||||||xx||xxxxxxxxxxx	tAACACTGTCTGgtaacgatgtt	CD2AP
bta-miR-30a-5p	ENSBTAT00000073351	ENSBTAG00000000322	2865	2886	-15.87	aCATTTGTTC-AG-TCACTTcata	x|||||||xxx||x|x||:|xxxx	tGTAAACATCCTCGACTGGAagct	CD2AP
bta-miR-497	ENSBTAT00000073351	ENSBTAG00000000322	2698	2718	-11.91	aTCGTCGT-TGAAAatttttct	x|||||||x|||x|xxxxxxxx	cAGCAGCACACTGTggtttgta	CD2AP
bta-miR-182	ENSBTAT00000073351	ENSBTAG00000000322	2255	2278	-23.13	aAACCGTTACTGTCTACGGTtcgt	x|||||||||::|||xx:||xxxx	tTTGGCAATGGTAGAACTCAcact	CD2AP
bta-miR-196a	ENSBTAT00000073351	ENSBTAG00000000322	429	452	-16.07	tTCCATCACCGATGTCAATGATat	x|||||||xx|x|:x|||::|:xx	tAGGTAGTTTC-AT-GTTGTTGgg	CD2AP
bta-miR-30f	ENSBTAT00000073351	ENSBTAG00000000322	2863	2886	-10.41	aCATTTGTtcagtcacttcatatg	x|||||||xxxxxxxxxxxxxxxx	tGTAAACAccctacactctcagct	CD2AP
bta-miR-92b	ENSBTAT00000073351	ENSBTAG00000000322	2656	2678	-13.76	gTAACGTGAACCAGtaaaataac	x||||||||x|x||xxxxxxxxx	tATTGCACTCG-TCccggcctcc	CD2AP
bta-miR-2370-5p	ENSBTAT00000073351	ENSBTAG00000000322	1034	1055	-11.44	tCCCTTTTGGACTCAtatgtgt	x|||||||:xxx|||xxxxxxx	tGGGAAAATGAAAGTtggttat	CD2AP
bta-miR-6119-5p	ENSBTAT00000073351	ENSBTAG00000000322	2400	2422	-10.95	tCTCCATTGTCGAAATAtcttac	x|||||||x|xx||x||xxxxxx	aGAGGTAAAAAATTGATttgact	CD2AP
bta-miR-10162-5p	ENSBTAT00000073351	ENSBTAG00000000322	2019	2040	-21.31	tCCTGTCCT-TTTGTCTATACga	x|||||||xx||:|x|x|:||xx	tGGACAGGCCAAGCCGCTGTGca	CD2AP
bta-miR-11991	ENSBTAT00000073351	ENSBTAG00000000322	2841	2863	-11.79	gACAAGACTCAAAGGGGTAttta	x|||||||xx|x||::x||xxxx	aTGTTCTG--TATCTTGATtgta	CD2AP
bta-miR-2303	ENSBTAT00000043139	ENSBTAG00000000330	170	190	-14.02	aGACTTACTTTACCGGAGTta	x||||||||x:|x|x||x|xx	tCTGAATGATGTCGACTGAtg	ALDH16A1
bta-miR-320a	ENSBTAT00000000437	ENSBTAG00000000332	77	98	-12.81	tTTTCGACgggagcggaggtcc	x|||||||xxxxxxxxxxxxxx	aAAAGCTGggttgagagggcga	ERF
bta-miR-10a	ENSBTAT00000000437	ENSBTAG00000000332	481	503	-12.77	tTGGGACACCccgatactctttg	x|||||||x|xxxxxxxxxxxxx	tACCCTGTAGatccgaatttgtg	ERF
bta-miR-10b	ENSBTAT00000000437	ENSBTAG00000000332	481	503	-12.77	tTGGGACACCccgatactctttg	x|||||||x|xxxxxxxxxxxxx	tACCCTGTAGaaccgaatttgtg	ERF
bta-miR-2431-3p	ENSBTAT00000000437	ENSBTAG00000000332	759	780	-25.09	cTGGGGGTGGG-GTCCCCGGGgt	x||||||||::x||x|xx||:xx	cACCCCCACTTGCATGACCCTga	ERF
bta-miR-10162-5p	ENSBTAT00000000437	ENSBTAG00000000332	195	217	-21.58	cCCTGTCCCCTACCGGGGTGggg	x|||||||xx|x|x|x|:::xxx	tGGACAGGCCAAGCCGCTGTgca	ERF
bta-miR-342	ENSBTAT00000000445	ENSBTAG00000000340	2209	2233	-19.64	tGAGTGTGGTGGTGTCGTGtcttcg	x|||||||x:xx|:x||||xxxxxx	tCTCACACAGAAATCGCACccatct	ADNP
bta-miR-497	ENSBTAT00000000445	ENSBTAG00000000340	896	917	-24.16	tTCGTCGTGAGTAACCGGACga	x||||||||x|xx|||::||xx	cAGCAGCACACTGTGGTTTGta	ADNP
bta-miR-144	ENSBTAT00000000445	ENSBTAG00000000340	501	523	-12.65	tTGTCATAGCATTCGAAGTGAac	x|||||||x|x|x|x|x:|||xx	tACAGTATAG-ATGATGTACTag	ADNP
bta-miR-1291	ENSBTAT00000000445	ENSBTAG00000000340	365	388	-23.76	aCCGGGACGTGCTggtaacattag	x|||||||xx:||xxxxxxxxxxx	tGGCCCTGACTGAagacctgcagt	ADNP
bta-miR-6119-3p	ENSBTAT00000000445	ENSBTAG00000000340	1374	1396	-10.81	cGTTTAGTTACGAATAAatacaa	x|||||||x|x:|||x|xxxxxx	gCAAATCATTTTTTACTctccaa	ADNP
bta-miR-1949	ENSBTAT00000000445	ENSBTAG00000000340	763	785	-12.21	tTATGGTCaaaaacaaaaacagt	x|||||||xxxxxxxxxxxxxxx	tATACCAGgatgccagcatagtt	ADNP
bta-miR-181b	ENSBTAT00000000447	ENSBTAG00000000342	112	135	-10.62	gTGTAAGTCAGGGTccgtgtgtct	x|||||||x|x|::xxxxxxxxxx	aACATTCATTGCTGtcggtgggtt	PLOD3
bta-miR-181b	ENSBTAT00000076905	ENSBTAG00000000342	558	581	-10.62	gTGTAAGTCAGGGTccgtgtgtct	x|||||||x|x|::xxxxxxxxxx	aACATTCATTGCTGtcggtgggtt	PLOD3
bta-miR-181c	ENSBTAT00000000447	ENSBTAG00000000342	113	135	-11.34	gTGTAAGTCAGG-GTCCGTgtgtc	x|||||||xx|:x:x||::xxxxx	aACATTCAACCTGTCGGTGagttt	PLOD3
bta-miR-181c	ENSBTAT00000076905	ENSBTAG00000000342	559	581	-11.34	gTGTAAGTCAGG-GTCCGTgtgtc	x|||||||xx|:x:x||::xxxxx	aACATTCAACCTGTCGGTGagttt	PLOD3
bta-miR-2431-3p	ENSBTAT00000000447	ENSBTAG00000000342	203	235	-27.78	tTGGGGGTCTCCAGGACAAGGGTACTCGGGAac	x|||||||xxxxx|:||xxxx|||||x||||xx	cACCCCCA-----CTTG----CATGA-CCCTga	PLOD3
bta-miR-2431-3p	ENSBTAT00000076905	ENSBTAG00000000342	649	681	-27.78	tTGGGGGTCTCCAGGACAAGGGTACTCGGGAac	x|||||||xxxxx|:||xxxx|||||x||||xx	cACCCCCA-----CTTG----CATGA-CCCTga	PLOD3
bta-miR-6535	ENSBTAT00000000447	ENSBTAG00000000342	38	59	-29.89	cTCCCCCTCGTGCCCTTCCgtg	x|||||||||:xxx|:|||xxx	tAGGGGGAGCGGTTGGAGGact	PLOD3
bta-miR-6535	ENSBTAT00000076905	ENSBTAG00000000342	484	505	-29.89	cTCCCCCTCGTGCCCTTCCgtg	x|||||||||:xxx|:|||xxx	tAGGGGGAGCGGTTGGAGGact	PLOD3
bta-miR-10162-5p	ENSBTAT00000000447	ENSBTAG00000000342	168	189	-23.9	tCCTGTCCCCCGAGG-GACTCga	x|||||||xxxxx||x|||x|xx	tGGACAGGCCAAGCCGCTGTGca	PLOD3
bta-miR-10162-5p	ENSBTAT00000076905	ENSBTAG00000000342	614	635	-23.9	tCCTGTCCCCCGAGG-GACTCga	x|||||||xxxxx||x|||x|xx	tGGACAGGCCAAGCCGCTGTGca	PLOD3
bta-miR-181b	ENSBTAT00000000453	ENSBTAG00000000347	408	431	-16.63	gTGTAAGTAGAAGA-ATCCtaagac	x||||||||x|x||x|x||xxxxxx	aACATTCAT-TGCTGTCGGtgggtt	RHOG
bta-miR-182	ENSBTAT00000000453	ENSBTAG00000000347	100	123	-14.43	gAACCGTTCCCcacggtctcaatc	x|||||||x||xxxxxxxxxxxxx	tTTGGCAATGGtagaactcacact	RHOG
bta-miR-6535	ENSBTAT00000000453	ENSBTAG00000000347	253	273	-27.8	aTCCCCCTTTACC-CCTCCccc	x|||||||:xx|xx|||||xxx	tAGGGGGAGCGGTTGGAGGact	RHOG
bta-miR-497	ENSBTAT00000000463	ENSBTAG00000000357	1070	1088	-15.34	cTCGTCGTC---CACCCActca	x|||||||xxxx||||x|xxxx	cAGCAGCACACTGTGGTTtgta	PRAG1
bta-miR-497	ENSBTAT00000084626	ENSBTAG00000000357	1070	1088	-15.34	cTCGTCGTC---CACCCActca	x|||||||xxxx||||x|xxxx	cAGCAGCACACTGTGGTTtgta	PRAG1
bta-miR-2303	ENSBTAT00000000463	ENSBTAG00000000357	1107	1128	-11.96	tGACTTACTCAAAATTttttac	x||||||||x|x|x:|xxxxxx	tCTGAATGA-TGTCGActgatg	PRAG1
bta-miR-2303	ENSBTAT00000084626	ENSBTAG00000000357	1107	1128	-11.96	tGACTTACTCAAAATTttttac	x||||||||x|x|x:|xxxxxx	tCTGAATGA-TGTCGActgatg	PRAG1
bta-miR-143	ENSBTAT00000000479	ENSBTAG00000000369	243	264	-17.87	aCTCTACTTTATTAATTAGGta	x||||||||:x|x|xx|x|:xx	tGAGATGAAGCACTGTAGCTcg	EPS8
bta-miR-143	ENSBTAT00000029983	ENSBTAG00000000369	243	264	-17.87	aCTCTACTTTATTAATTAGGta	x||||||||:x|x|xx|x|:xx	tGAGATGAAGCACTGTAGCTcg	EPS8
bta-miR-143	ENSBTAT00000072625	ENSBTAG00000000369	243	264	-17.87	aCTCTACTTTATTAATTAGGta	x||||||||:x|x|xx|x|:xx	tGAGATGAAGCACTGTAGCTcg	EPS8
bta-miR-143	ENSBTAT00000084510	ENSBTAG00000000369	194	215	-17.87	aCTCTACTTTATTAATTAGGta	x||||||||:x|x|xx|x|:xx	tGAGATGAAGCACTGTAGCTcg	EPS8
bta-miR-144	ENSBTAT00000000479	ENSBTAG00000000369	646	669	-23.96	gTGTCATATCTATTATTCATctca	x|||||||||||:||xx|||xxxx	tACAGTATAGATGAT--GTActag	EPS8
bta-miR-144	ENSBTAT00000029983	ENSBTAG00000000369	646	669	-23.96	gTGTCATATCTATTATTCATctca	x|||||||||||:||xx|||xxxx	tACAGTATAGATGAT--GTActag	EPS8
bta-miR-144	ENSBTAT00000072625	ENSBTAG00000000369	646	669	-23.96	gTGTCATATCTATTATTCATctca	x|||||||||||:||xx|||xxxx	tACAGTATAGATGAT--GTActag	EPS8
bta-miR-144	ENSBTAT00000084510	ENSBTAG00000000369	597	620	-23.96	gTGTCATATCTATTATTCATctca	x|||||||||||:||xx|||xxxx	tACAGTATAGATGAT--GTActag	EPS8
bta-miR-769	ENSBTAT00000000479	ENSBTAG00000000369	420	441	-16.73	tCTCTGGATTCATTCGTCTCtg	x|||||||xx|x:xx|x|||xx	tGAGACCTCCGGGTTCTGAGct	EPS8
bta-miR-769	ENSBTAT00000029983	ENSBTAG00000000369	420	441	-16.73	tCTCTGGATTCATTCGTCTCtg	x|||||||xx|x:xx|x|||xx	tGAGACCTCCGGGTTCTGAGct	EPS8
bta-miR-769	ENSBTAT00000072625	ENSBTAG00000000369	420	441	-16.73	tCTCTGGATTCATTCGTCTCtg	x|||||||xx|x:xx|x|||xx	tGAGACCTCCGGGTTCTGAGct	EPS8
bta-miR-769	ENSBTAT00000084510	ENSBTAG00000000369	371	392	-16.73	tCTCTGGATTCATTCGTCTCtg	x|||||||xx|x:xx|x|||xx	tGAGACCTCCGGGTTCTGAGct	EPS8
bta-miR-3613a	ENSBTAT00000000479	ENSBTAG00000000369	514	535	-16.52	aCAACATGAAATGTCAAGTAat	x||||||||||x:xx||::|xx	tGTTGTACTTTTTTTTTTGTtc	EPS8
bta-miR-3613a	ENSBTAT00000029983	ENSBTAG00000000369	514	535	-16.52	aCAACATGAAATGTCAAGTAat	x||||||||||x:xx||::|xx	tGTTGTACTTTTTTTTTTGTtc	EPS8
bta-miR-3613a	ENSBTAT00000072625	ENSBTAG00000000369	514	535	-16.52	aCAACATGAAATGTCAAGTAat	x||||||||||x:xx||::|xx	tGTTGTACTTTTTTTTTTGTtc	EPS8
bta-miR-3613a	ENSBTAT00000084510	ENSBTAG00000000369	465	486	-16.52	aCAACATGAAATGTCAAGTAat	x||||||||||x:xx||::|xx	tGTTGTACTTTTTTTTTTGTtc	EPS8
bta-miR-1949	ENSBTAT00000000479	ENSBTAG00000000369	841	863	-13.41	tTATGGTCTTTTTGAACTGTacc	x|||||||:|x:x|xxx|:|xxx	tATACCAGGATGCCAGCATAgtt	EPS8
bta-miR-1949	ENSBTAT00000029983	ENSBTAG00000000369	841	863	-13.41	tTATGGTCTTTTTGAACTGTacc	x|||||||:|x:x|xxx|:|xxx	tATACCAGGATGCCAGCATAgtt	EPS8
bta-miR-1949	ENSBTAT00000072625	ENSBTAG00000000369	841	863	-13.41	tTATGGTCTTTTTGAACTGTacc	x|||||||:|x:x|xxx|:|xxx	tATACCAGGATGCCAGCATAgtt	EPS8
bta-miR-1949	ENSBTAT00000084510	ENSBTAG00000000369	792	814	-13.41	tTATGGTCTTTTTGAACTGTacc	x|||||||:|x:x|xxx|:|xxx	tATACCAGGATGCCAGCATAgtt	EPS8
bta-miR-192	ENSBTAT00000000481	ENSBTAG00000000371	175	195	-17.69	gACTGGAT---TAACGTGTattta	x|||||||xxx||||x|||xxxxx	cTGACCTATGAATTG-ACAgccag	DIS3L
bta-miR-183	ENSBTAT00000000481	ENSBTAG00000000371	66	86	-12.8	tTACCGTGTC--TTTGAAaatag	x|||||||x|xx|:|x||xxxxx	tATGGCACTGGTAGAATTcactg	DIS3L
bta-miR-92b	ENSBTAT00000000481	ENSBTAG00000000371	167	188	-11.19	tTAACGTGtatttacgttgaat	x|||||||xxxxxxxxxxxxxx	tATTGCACtcgtcccggcctcc	DIS3L
bta-miR-497	ENSBTAT00000000482	ENSBTAG00000000372	508	529	-12.73	tTCGTCGTTTTCGATGAAtaat	x|||||||x|xxx|:x||xxxx	cAGCAGCACACTGTGGTTtgta	TIPIN
bta-miR-497	ENSBTAT00000068089	ENSBTAG00000000372	508	529	-12.73	tTCGTCGTTTTCGATGAAtaat	x|||||||x|xxx|:x||xxxx	cAGCAGCACACTGTGGTTtgta	TIPIN
bta-miR-497	ENSBTAT00000086279	ENSBTAG00000000372	508	529	-12.73	tTCGTCGTTTTCGATGAAtaat	x|||||||x|xxx|:x||xxxx	cAGCAGCACACTGTGGTTtgta	TIPIN
bta-miR-497	ENSBTAT00000000486	ENSBTAG00000000375	269	289	-15.75	tTCGTCGTC-GATATGGGGTtt	x|||||||xx||:|:x::::xx	cAGCAGCACACTGTGGTTTGta	SSRP1
bta-miR-497	ENSBTAT00000073946	ENSBTAG00000000375	269	289	-15.75	tTCGTCGTC-GATATGGGGTtt	x|||||||xx||:|:x::::xx	cAGCAGCACACTGTGGTTTGta	SSRP1
bta-miR-183	ENSBTAT00000000486	ENSBTAG00000000375	96	114	-17.17	cTACCGTG----TCTTGGGTtcc	x|||||||xxxx||||::||xxx	tATGGCACTGGTAGAATTCActg	SSRP1
bta-miR-183	ENSBTAT00000073946	ENSBTAG00000000375	96	114	-17.17	cTACCGTG----TCTTGGGTtcc	x|||||||xxxx||||::||xxx	tATGGCACTGGTAGAATTCActg	SSRP1
bta-miR-148a	ENSBTAT00000000490	ENSBTAG00000000379	400	422	-12.81	tGTCACGTTGACCTTTATAAAaa	x|||||||x||xx|:|xx|||xx	tCAGTGCA-CTACAGAACTTTgt	GOLT1B
bta-miR-148a	ENSBTAT00000069127	ENSBTAG00000000379	463	485	-12.81	tGTCACGTTGACCTTTATAAAaa	x|||||||x||xx|:|xx|||xx	tCAGTGCA-CTACAGAACTTTgt	GOLT1B
bta-miR-148a	ENSBTAT00000076217	ENSBTAG00000000379	432	454	-12.81	tGTCACGTTGACCTTTATAAAaa	x|||||||x||xx|:|xx|||xx	tCAGTGCA-CTACAGAACTTTgt	GOLT1B
bta-miR-200a	ENSBTAT00000000490	ENSBTAG00000000379	475	497	-18.34	gTTGTGACccaaaaggaccaaaa	x|||||||xxxxxxxxxxxxxxx	tAACACTGtctggtaacgatgtt	GOLT1B
bta-miR-200a	ENSBTAT00000069127	ENSBTAG00000000379	538	560	-18.34	gTTGTGACccaaaaggaccaaaa	x|||||||xxxxxxxxxxxxxxx	tAACACTGtctggtaacgatgtt	GOLT1B
bta-miR-200a	ENSBTAT00000076217	ENSBTAG00000000379	507	529	-18.34	gTTGTGACccaaaaggaccaaaa	x|||||||xxxxxxxxxxxxxxx	tAACACTGtctggtaacgatgtt	GOLT1B
bta-miR-152	ENSBTAT00000000490	ENSBTAG00000000379	399	422	-14.22	tGTCACGTTGACCTTTATAAAaac	x|||||||xx||xx|:x|x||xxx	tCAGTGCA--TGACAGAACTTggg	GOLT1B
bta-miR-152	ENSBTAT00000069127	ENSBTAG00000000379	462	485	-14.22	tGTCACGTTGACCTTTATAAAaac	x|||||||xx||xx|:x|x||xxx	tCAGTGCA--TGACAGAACTTggg	GOLT1B
bta-miR-152	ENSBTAT00000076217	ENSBTAG00000000379	431	454	-14.22	tGTCACGTTGACCTTTATAAAaac	x|||||||xx||xx|:x|x||xxx	tCAGTGCA--TGACAGAACTTggg	GOLT1B
bta-miR-31	ENSBTAT00000000493	ENSBTAG00000000382	539	559	-18.49	tCCGTTCTTCGTCCCTCTaca	x|||||||x||x||x|x|xxx	aGGCAAGATGCTGGCATAgct	MED27
bta-miR-200a	ENSBTAT00000000493	ENSBTAG00000000382	558	580	-18.77	gTTGTGACGGGagagagggcttc	x|||||||:|:xxxxxxxxxxxx	tAACACTGTCTggtaacgatgtt	MED27
bta-miR-146b	ENSBTAT00000000493	ENSBTAG00000000382	936	962	-19.42	tCTCTTGAACGGAACAGAGATTCGAcc	x|||||||x|xx||xx|xx||:|||xx	tGAGAACT-GAATT--CCATAGGCTgt	MED27
bta-miR-1291	ENSBTAT00000000493	ENSBTAG00000000382	813	836	-22.4	tCCGGGACTTATTTgagtcatcta	x||||||||x|:||xxxxxxxxxx	tGGCCCTGACTGAAgacctgcagt	MED27
bta-miR-148a	ENSBTAT00000000497	ENSBTAG00000000385	927	948	-13.91	tGTCACGTAATTGCAAGAAGta	x|||||||x||xx|xx|||:xx	tCAGTGCACTACAGAACTTTgt	ZBTB18
bta-miR-106a	ENSBTAT00000000497	ENSBTAG00000000385	120	138	-13.04	aTTTCACG--TTTT-TGTTCaa	x|||||||xx|x|:x:||:|xx	aAAAGTGCTTACAGTGCAGGta	ZBTB18
bta-miR-30e-5p	ENSBTAT00000000497	ENSBTAG00000000385	1056	1079	-16.07	aCATTTGTAaatataaaaggaaca	x||||||||xxxxxxxxxxxxxxx	tGTAAACATccttgactggaagct	ZBTB18
bta-miR-192	ENSBTAT00000000497	ENSBTAG00000000385	1199	1224	-14.89	tACTGGATAACAGTTAAacacgtcat	x||||||||x|xx||||xxxxxxxxx	cTGACCTAT-G--AATTgacagccag	ZBTB18
bta-miR-200a	ENSBTAT00000000497	ENSBTAG00000000385	1471	1489	-15.51	tTTGTGACA---CGTT-TTACga	x||||||||xxx|:||x:|||xx	tAACACTGTCTGGTAACGATGtt	ZBTB18
bta-miR-30a-5p	ENSBTAT00000000497	ENSBTAG00000000385	1056	1079	-11.57	aCATTTGTAaatataaaaggaaca	x||||||||xxxxxxxxxxxxxxx	tGTAAACATcctcgactggaagct	ZBTB18
bta-miR-144	ENSBTAT00000000497	ENSBTAG00000000385	680	703	-15.7	aTGTCATATGTTATTGTCATTAag	x||||||||x:||:|:x|||x|xx	tACAGTATA-GATGAT-GTACTag	ZBTB18
bta-miR-152	ENSBTAT00000000497	ENSBTAG00000000385	927	948	-16.69	tGTCACGTAATTGCAAGAAgta	x||||||||x|xx|xx|||xxx	tCAGTGCATGACAGAACTTggg	ZBTB18
bta-miR-2370-5p	ENSBTAT00000000497	ENSBTAG00000000385	334	354	-14.46	aCCCTTTTTCCT-CTCTCGAgt	x|||||||x|x|x|xx:|:|xx	tGGGAAAATGAAAGTTGGTTat	ZBTB18
bta-miR-2408	ENSBTAT00000000502	ENSBTAG00000000390	155	178	-22.98	tTGCACACGACTGTAGGGTGGGag	x|||||||x|||xxx|:||x||xx	cACGTGTG-TGAG--CTCAGCCgg	TPST1
bta-miR-320a	ENSBTAT00000000504	ENSBTAG00000000392	592	615	-18.06	cTTTCGACATCCCCCCGTCCCtac	x|||||||xx||xx|xx||||xxx	aAAAGCTG--GGTTGAGAGGGcga	ASCC1
bta-miR-30e-5p	ENSBTAT00000000506	ENSBTAG00000000393	22	47	-16.13	aCATTTGTGTGCTAGCTCAagaaacc	x|||||||:x|xx|:||x|xxxxxxx	tGTAAACATCC--TTGACTggaagct	SSPN
bta-miR-30a-5p	ENSBTAT00000000506	ENSBTAG00000000393	22	47	-17.85	aCATTTGTGTGCTAGCTCAagaaacc	x|||||||:x|xx||||x|xxxxxxx	tGTAAACATCC--TCGACTggaagct	SSPN
bta-miR-30f	ENSBTAT00000000506	ENSBTAG00000000393	24	47	-12.39	aCATTTGTGTGCTagctcaagaaa	x||||||||x|x|xxxxxxxxxxx	tGTAAACACCCTAcactctcagct	SSPN
bta-miR-192	ENSBTAT00000000511	ENSBTAG00000000396	290	312	-22.83	gACTGGATGagggtgggggtggc	x|||||||:xxxxxxxxxxxxxx	cTGACCTATgaattgacagccag	PIM1
bta-miR-497	ENSBTAT00000000511	ENSBTAG00000000396	499	520	-12.37	tTCGTCGTccattttctccgtt	x|||||||xxxxxxxxxxxxxx	cAGCAGCAcactgtggtttgta	PIM1
bta-miR-144	ENSBTAT00000000511	ENSBTAG00000000396	1318	1339	-11.65	aTGTCATAaagtgagtctattt	x|||||||xxxxxxxxxxxxxx	tACAGTATagatgatgtactag	PIM1
bta-miR-183	ENSBTAT00000000511	ENSBTAG00000000396	579	601	-18.02	gTACCGTGGAAAGTGTActtcct	x|||||||:xx|x:x||xxxxxx	tATGGCACTGGTAGAATtcactg	PIM1
bta-miR-671	ENSBTAT00000000511	ENSBTAG00000000396	1149	1171	-27.96	cCCTTCGGCCGCTCCCCcggggg	x|||||||xxx||||||xxxxxx	aGGAAGCCCTGGAGGGGctggag	PIM1
bta-miR-1291	ENSBTAT00000000511	ENSBTAG00000000396	596	619	-23.25	aCCGGGACatcggagaaggtaccg	x|||||||xxxxxxxxxxxxxxxx	tGGCCCTGactgaagacctgcagt	PIM1
bta-miR-2370-5p	ENSBTAT00000000511	ENSBTAG00000000396	4	25	-11.14	tCCCTTTTtggacaccctcttc	x|||||||xxxxxxxxxxxxxx	tGGGAAAAtgaaagttggttat	PIM1
bta-miR-2431-3p	ENSBTAT00000000511	ENSBTAG00000000396	276	300	-36.12	gTGGGGGTGGCGGCGGGTGGGGAcc	x||||||||:xx:||x::x||||xx	cACCCCCACT--TGCATGACCCTga	PIM1
bta-miR-6535	ENSBTAT00000000511	ENSBTAG00000000396	550	570	-25.32	tTCCCCCTTCCCT-CTTTCTct	x|||||||:x||xx|:|:||xx	tAGGGGGAGCGGTTGGAGGAct	PIM1
bta-miR-342	ENSBTAT00000000527	ENSBTAG00000000411	385	408	-21.43	tGAGTGTGA--TCAGTGTCTGGTAcc	x|||||||xxx|x||:||xx||||xx	tCTCACACAGAAATCGCAC-CCATct	HGS
bta-miR-183	ENSBTAT00000069967	ENSBTAG00000000415	1449	1471	-15.43	aTACCGTGAaaaaagaccaggtt	x||||||||xxxxxxxxxxxxxx	tATGGCACTggtagaattcactg	ERBIN
bta-miR-10a	ENSBTAT00000053193	ENSBTAG00000000417	7	29	-16.7	tTGGGACAggtgtcagaggaccc	x|||||||xxxxxxxxxxxxxxx	tACCCTGTagatccgaatttgtg	MRPL12
bta-miR-10b	ENSBTAT00000053193	ENSBTAG00000000417	7	29	-16.7	tTGGGACAggtgtcagaggaccc	x|||||||xxxxxxxxxxxxxxx	tACCCTGTagaaccgaatttgtg	MRPL12
bta-miR-2431-3p	ENSBTAT00000053193	ENSBTAG00000000417	360	382	-29.53	gTGGGGGTGTTCGTCCTGtccgt	x||||||||xx|||x|||xxxxx	cACCCCCACTTGCATGACcctga	MRPL12
bta-miR-10162-5p	ENSBTAT00000053193	ENSBTAG00000000417	349	369	-17.66	tCCTGTCCG-TACG-CAACCCta	x||||||||x|x||x|x||x|xx	tGGACAGGCCAAGCCGCTGTGca	MRPL12
bta-miR-148a	ENSBTAT00000000549	ENSBTAG00000000428	796	816	-21.29	cGTCACGTGA-GTCTgctctgg	x|||||||||x||||xxxxxxx	tCAGTGCACTACAGAactttgt	BAK1
bta-miR-320a	ENSBTAT00000000549	ENSBTAG00000000428	125	146	-15.11	gTTTCGACCTCACgggtgaatg	x||||||||:x||xxxxxxxxx	aAAAGCTGGGTTGagagggcga	BAK1
bta-miR-10a	ENSBTAT00000000549	ENSBTAG00000000428	826	848	-23.44	tTGGGACATCGGGTCcactccac	x|||||||||x:|x|xxxxxxxx	tACCCTGTAGATCCGaatttgtg	BAK1
bta-miR-10b	ENSBTAT00000000549	ENSBTAG00000000428	826	848	-22.13	tTGGGACATCGGGTCcactccac	x|||||||||xx|x|xxxxxxxx	tACCCTGTAGAACCGaatttgtg	BAK1
bta-miR-152	ENSBTAT00000000549	ENSBTAG00000000428	796	816	-20.33	cGTCACGTGA-GTCTgctctgg	x|||||||:xx||||xxxxxxx	tCAGTGCATGACAGAacttggg	BAK1
bta-miR-451	ENSBTAT00000000549	ENSBTAG00000000428	330	353	-13.96	tTTGGCAATTGCTGCTGAaccctc	x||||||||x|x|:x|||xxxxxx	aAACCGTTACC-ATTACTgagttt	BAK1
bta-miR-2431-3p	ENSBTAT00000000549	ENSBTAG00000000428	413	435	-21.74	tTGGGGGTGtcgggtcgacagga	x||||||||xxxxxxxxxxxxxx	cACCCCCACttgcatgaccctga	BAK1
bta-miR-6535	ENSBTAT00000000549	ENSBTAG00000000428	72	97	-26.42	gTCCCCCTGTGGGGACAATCTCTcct	x|||||||xxxxx|x|||:|||:xxx	tAGGGGGAG----CGGTTGGAGGact	BAK1
bta-miR-183	ENSBTAT00000071454	ENSBTAG00000000429	618	640	-14.19	aTACCGTGTTTGTTccaccccac	x|||||||x:::|:xxxxxxxxx	tATGGCACTGGTAGaattcactg	DGCR2
bta-miR-183	ENSBTAT00000073902	ENSBTAG00000000429	618	640	-14.19	aTACCGTGTTTGTTccaccccac	x|||||||x:::|:xxxxxxxxx	tATGGCACTGGTAGaattcactg	DGCR2
bta-miR-2431-3p	ENSBTAT00000071454	ENSBTAG00000000429	339	359	-28.08	gTGGGGGTCT-CGT-CGGAGAct	x|||||||xxx|||x|x|x||xx	cACCCCCACTTGCATGACCCTga	DGCR2
bta-miR-2431-3p	ENSBTAT00000073902	ENSBTAG00000000429	339	359	-28.08	gTGGGGGTCT-CGT-CGGAGAct	x|||||||xxx|||x|x|x||xx	cACCCCCACTTGCATGACCCTga	DGCR2
bta-miR-2303	ENSBTAT00000000556	ENSBTAG00000000434	117	137	-14.25	cGACTTACTATAAATAATcga	x|||||||||:|xx|x|:xxx	tCTGAATGATGTCGACTGatg	CRYAB
bta-miR-2303	ENSBTAT00000076985	ENSBTAG00000000434	117	137	-14.25	cGACTTACTATAAATAATcga	x|||||||||:|xx|x|:xxx	tCTGAATGATGTCGACTGatg	CRYAB
bta-miR-2303	ENSBTAT00000087415	ENSBTAG00000000434	117	137	-14.25	cGACTTACTATAAATAATcga	x|||||||||:|xx|x|:xxx	tCTGAATGATGTCGACTGatg	CRYAB
bta-miR-106a	ENSBTAT00000086293	ENSBTAG00000000446	372	394	-13.24	tTTTCACGTCATTTCGAGACTtt	x|||||||xx||x||:x|x|:xx	aAAAGTGCT-TACAGTGCAGGta	ATP11A
bta-miR-2332	ENSBTAT00000086293	ENSBTAG00000000446	324	350	-21.58	aCCAAATTCAATGTTACTCTCTGTTgt	x||||||||x|x:xx||x|||||||xx	cGGTTTAAGGTCT--TG-GAGACAAag	ATP11A
bta-miR-2431-3p	ENSBTAT00000086293	ENSBTAG00000000446	25	48	-30.06	gTGGGGGTAGGGCGGGGTCGGcgt	x|||||||x|::||x:x|x||xxx	cACCCCCA-CTTGCATGACCCtga	ATP11A
bta-miR-2285bf	ENSBTAT00000086293	ENSBTAG00000000446	710	730	-10.86	aTTTGTGCGTaggcccgaacg	x|||||||x|xxxxxxxxxxx	aAAACACGAAcaaactttttg	ATP11A
bta-miR-181b	ENSBTAT00000000579	ENSBTAG00000000455	138	160	-13.89	gTGTAAGTA-CGAAAATCGatttg	x||||||||x|||x|x:|:xxxxx	aACATTCATTGCTGTCGGTgggtt	CREBZF
bta-miR-143	ENSBTAT00000000579	ENSBTAG00000000455	989	1010	-10.35	tCTCTACTTATTTAagaaactc	x||||||||xx|x|xxxxxxxx	tGAGATGAAGCACTgtagctcg	CREBZF
bta-miR-2332	ENSBTAT00000000579	ENSBTAG00000000455	1096	1118	-11.13	aCCAAATTAAA-AATCTTTTTgcg	x|||||||xx|x||:||:|x|xxx	cGGTTTAAGGTCTTGGAGACAaag	CREBZF
bta-miR-11991	ENSBTAT00000000579	ENSBTAG00000000455	250	270	-15.04	gACAAGACATTGGGgatgttg	x|||||||||x|::xxxxxxx	aTGTTCTGTATCTTgattgta	CREBZF
bta-miR-182	ENSBTAT00000000581	ENSBTAG00000000458	621	644	-14.62	cAACCGTTTCCTTACAGAGacgaa	x|||||||x||x|xxx|||xxxxx	tTTGGCAATGGTAGAACTCacact	DYNC1LI2
bta-miR-2303	ENSBTAT00000000581	ENSBTAG00000000458	416	436	-12.28	aGACTTACAACtcgaaattcg	x|||||||x||xxxxxxxxxx	tCTGAATGATGtcgactgatg	DYNC1LI2
bta-miR-200a	ENSBTAT00000030378	ENSBTAG00000000460	587	606	-11.01	tTTGTGAC---CCTTTTCccttg	x|||||||xxx||x||x|xxxxx	tAACACTGTCTGGTAACGatgtt	SYTL2
bta-miR-497	ENSBTAT00000030378	ENSBTAG00000000460	233	255	-20.4	gTCGTCGTTACGAAACTAAAaga	x|||||||xxx||x||:|||xxx	cAGCAGCACA-CTGTGGTTTgta	SYTL2
bta-miR-144	ENSBTAT00000030378	ENSBTAG00000000460	830	855	-10.05	cTGTCATATTAAATTGTTAAATGtaa	x||||||||:xxxx|::||x|||xxx	tACAGTATAG----ATGATGTACtag	SYTL2
bta-miR-2370-5p	ENSBTAT00000030378	ENSBTAG00000000460	579	600	-11.63	aCCCTTTTCCCTTgtgaagagt	x|||||||x|x||xxxxxxxxx	tGGGAAAATGAAAgttggttat	SYTL2
bta-miR-6119-3p	ENSBTAT00000030378	ENSBTAG00000000460	785	812	-20.51	cGTTTAGTACAAACACTGGTGAGAGtac	x||||||||x|||xxxxx:||||||xxx	gCAAATCATTTTT-----TACTCTCcaa	SYTL2
bta-miR-200a	ENSBTAT00000000596	ENSBTAG00000000469	635	657	-11.12	tTTGTGACGtcacgagaacacgt	x|||||||:xxxxxxxxxxxxxx	tAACACTGTctggtaacgatgtt	PPP2CA
bta-miR-183	ENSBTAT00000000596	ENSBTAG00000000469	126	148	-15.38	aTACCGTGtagaaaaaccaggca	x|||||||xxxxxxxxxxxxxxx	tATGGCACtggtagaattcactg	PPP2CA
bta-miR-2370-5p	ENSBTAT00000000596	ENSBTAG00000000469	512	532	-14.94	tCCCTTTTA-TTTGACTCAcgt	x||||||||x|||x|x:||xxx	tGGGAAAATGAAAGTTGGTtat	PPP2CA
bta-miR-1291	ENSBTAT00000000607	ENSBTAG00000000480	158	186	-27.33	aCCGGGACCCTGCCCCTTCTCCGACGcac	x|||||||xx||x|xx||||xx||||xxx	tGGCCCTG--ACTG--AAGAC-CTGCagt	IFRD2
bta-miR-497	ENSBTAT00000056728	ENSBTAG00000000492	51	70	-14.15	tTCGTCGTCTCATA--AAATaa	x|||||||x|x|:|xx|||:xx	cAGCAGCACACTGTGGTTTGta	ASNSD1
bta-miR-497	ENSBTAT00000086508	ENSBTAG00000000492	51	70	-14.15	tTCGTCGTCTCATA--AAATaa	x|||||||x|x|:|xx|||:xx	cAGCAGCACACTGTGGTTTGta	ASNSD1
bta-miR-143	ENSBTAT00000000630	ENSBTAG00000000497	16	35	-14.69	tCTCTACTT--TTCCTTCGGtc	x||||||||xx|xx|x|||:xx	tGAGATGAAGCACTGTAGCTcg	AKR1A1
bta-miR-671	ENSBTAT00000000630	ENSBTAG00000000497	4	25	-27.38	tCCTTCGGTCCTTCGAC-ACCag	x|||||||xx|:||xx|x|||xx	aGGAAGCCCTGGAGGGGCTGGag	AKR1A1
bta-miR-182	ENSBTAT00000000639	ENSBTAG00000000501	462	485	-10.12	cAACCGTTGgaaaacagaccacag	x|||||||:xxxxxxxxxxxxxxx	tTTGGCAATggtagaactcacact	KLHL13
bta-miR-182	ENSBTAT00000071219	ENSBTAG00000000501	462	485	-10.12	cAACCGTTGgaaaacagaccacag	x|||||||:xxxxxxxxxxxxxxx	tTTGGCAATggtagaactcacact	KLHL13
bta-miR-182	ENSBTAT00000083192	ENSBTAG00000000501	462	485	-10.12	cAACCGTTGgaaaacagaccacag	x|||||||:xxxxxxxxxxxxxxx	tTTGGCAATggtagaactcacact	KLHL13
bta-miR-182	ENSBTAT00000083269	ENSBTAG00000000501	462	485	-10.12	cAACCGTTGgaaaacagaccacag	x|||||||:xxxxxxxxxxxxxxx	tTTGGCAATggtagaactcacact	KLHL13
bta-miR-2370-5p	ENSBTAT00000000639	ENSBTAG00000000501	902	919	-15.87	tCCCTTTT----TAGACCAGtt	x|||||||xxxx|x:||||:xx	tGGGAAAATGAAAGTTGGTTat	KLHL13
bta-miR-2431-3p	ENSBTAT00000000639	ENSBTAG00000000501	535	557	-26.54	gTGGGGGTGTCTGTCCTcccgac	x||||||||xx:||x||xxxxxx	cACCCCCACTTGCATGAccctga	KLHL13
bta-miR-2431-3p	ENSBTAT00000071219	ENSBTAG00000000501	535	557	-26.54	gTGGGGGTGTCTGTCCTcccgac	x||||||||xx:||x||xxxxxx	cACCCCCACTTGCATGAccctga	KLHL13
bta-miR-2431-3p	ENSBTAT00000083192	ENSBTAG00000000501	535	557	-26.54	gTGGGGGTGTCTGTCCTcccgac	x||||||||xx:||x||xxxxxx	cACCCCCACTTGCATGAccctga	KLHL13
bta-miR-2431-3p	ENSBTAT00000083269	ENSBTAG00000000501	535	557	-26.54	gTGGGGGTGTCTGTCCTcccgac	x||||||||xx:||x||xxxxxx	cACCCCCACTTGCATGAccctga	KLHL13
bta-miR-148a	ENSBTAT00000000651	ENSBTAG00000000510	185	205	-19.25	tGTCACGTCCGGTCT-GAActg	x|||||||xxx||||x|||xxx	tCAGTGCACTACAGAACTTtgt	ATG101
bta-miR-152	ENSBTAT00000000651	ENSBTAG00000000510	185	205	-24.23	tGTCACGTCCGGTCT-GAACtg	x|||||||x|x||||x||||xx	tCAGTGCATGACAGAACTTGgg	ATG101
bta-miR-671	ENSBTAT00000000651	ENSBTAG00000000510	114	136	-25.17	tCCTTCGGTCCCGCCGGGAaggt	x|||||||xx||x||xx||xxxx	aGGAAGCCCTGGAGGGGCTggag	ATG101
bta-miR-182	ENSBTAT00000000686	ENSBTAG00000000526	513	536	-14.31	gAACCGTTtgtagtacctctaaac	x|||||||xxxxxxxxxxxxxxxx	tTTGGCAAtggtagaactcacact	TOPBP1
bta-miR-182	ENSBTAT00000071046	ENSBTAG00000000526	513	536	-14.31	gAACCGTTtgtagtacctctaaac	x|||||||xxxxxxxxxxxxxxxx	tTTGGCAAtggtagaactcacact	TOPBP1
bta-miR-182	ENSBTAT00000078321	ENSBTAG00000000526	43	66	-14.31	gAACCGTTtgtagtacctctaaac	x|||||||xxxxxxxxxxxxxxxx	tTTGGCAAtggtagaactcacact	TOPBP1
bta-miR-182	ENSBTAT00000078550	ENSBTAG00000000526	513	536	-14.31	gAACCGTTtgtagtacctctaaac	x|||||||xxxxxxxxxxxxxxxx	tTTGGCAAtggtagaactcacact	TOPBP1
bta-miR-182	ENSBTAT00000080897	ENSBTAG00000000526	513	536	-14.31	gAACCGTTtgtagtacctctaaac	x|||||||xxxxxxxxxxxxxxxx	tTTGGCAAtggtagaactcacact	TOPBP1
bta-miR-182	ENSBTAT00000081913	ENSBTAG00000000526	513	536	-14.31	gAACCGTTtgtagtacctctaaac	x|||||||xxxxxxxxxxxxxxxx	tTTGGCAAtggtagaactcacact	TOPBP1
bta-miR-182	ENSBTAT00000084226	ENSBTAG00000000526	513	536	-14.31	gAACCGTTtgtagtacctctaaac	x|||||||xxxxxxxxxxxxxxxx	tTTGGCAAtggtagaactcacact	TOPBP1
bta-miR-2370-5p	ENSBTAT00000000686	ENSBTAG00000000526	374	395	-12.82	tCCCTTTTATACTTACTTAGgg	x||||||||:xx|:|x::|:xx	tGGGAAAATGAAAGTTGGTTat	TOPBP1
bta-miR-2370-5p	ENSBTAT00000071046	ENSBTAG00000000526	374	395	-12.82	tCCCTTTTATACTTACTTAGgg	x||||||||:xx|:|x::|:xx	tGGGAAAATGAAAGTTGGTTat	TOPBP1
bta-miR-2370-5p	ENSBTAT00000078550	ENSBTAG00000000526	374	395	-12.82	tCCCTTTTATACTTACTTAGgg	x||||||||:xx|:|x::|:xx	tGGGAAAATGAAAGTTGGTTat	TOPBP1
bta-miR-2370-5p	ENSBTAT00000080897	ENSBTAG00000000526	374	395	-12.82	tCCCTTTTATACTTACTTAGgg	x||||||||:xx|:|x::|:xx	tGGGAAAATGAAAGTTGGTTat	TOPBP1
bta-miR-2370-5p	ENSBTAT00000081913	ENSBTAG00000000526	374	395	-12.82	tCCCTTTTATACTTACTTAGgg	x||||||||:xx|:|x::|:xx	tGGGAAAATGAAAGTTGGTTat	TOPBP1
bta-miR-2370-5p	ENSBTAT00000084226	ENSBTAG00000000526	374	395	-12.82	tCCCTTTTATACTTACTTAGgg	x||||||||:xx|:|x::|:xx	tGGGAAAATGAAAGTTGGTTat	TOPBP1
bta-miR-2431-3p	ENSBTAT00000036100	ENSBTAG00000000527	543	564	-23.51	gTGGGGGTAAAGG-ACgagtcac	x|||||||x||x|x||xxxxxxx	cACCCCCACTTGCATGaccctga	ZFAND3
bta-miR-30e-5p	ENSBTAT00000078052	ENSBTAG00000000529	385	408	-14.89	tCATTTGTGTGACTTCAgaggaaa	x|||||||:x||x:|x|xxxxxxx	tGTAAACATCCTTGACTggaagct	BTBD9
bta-let-7d	ENSBTAT00000078052	ENSBTAG00000000529	248	268	-16.05	tCTCCATCCCACAAT-TACCtc	x|||||||xxx|||:x||x|xx	aGAGGTAGTAGGTTGCATAGtt	BTBD9
bta-let-7g	ENSBTAT00000078052	ENSBTAG00000000529	246	268	-12.21	tCTCCATCCCACAATTACCTCct	x|||||||xxx|||x:|xx||xx	tGAGGTAGTA-GTTTGTACAGtt	BTBD9
bta-miR-30a-5p	ENSBTAT00000078052	ENSBTAG00000000529	385	408	-14.89	tCATTTGTGTGACTTCAgaggaaa	x|||||||:x||x:|x|xxxxxxx	tGTAAACATCCTCGACTggaagct	BTBD9
bta-let-7a-5p	ENSBTAT00000078052	ENSBTAG00000000529	248	268	-15.46	tCTCCATCCCACAAT-TACCtc	x|||||||xxx|||:x||x|xx	tGAGGTAGTAGGTTGTATAGtt	BTBD9
bta-let-7b	ENSBTAT00000078052	ENSBTAG00000000529	248	268	-19.71	tCTCCATCCCACAAT-TACCtc	x|||||||xxx|||:x:|||xx	tGAGGTAGTAGGTTGTGTGGtt	BTBD9
bta-let-7e	ENSBTAT00000078052	ENSBTAG00000000529	249	268	-19.11	tCTCCATCCCACAAT-TAcct	x||||||||xx|||:x||xxx	tGAGGTAGGAGGTTGTATagt	BTBD9
bta-miR-30f	ENSBTAT00000078052	ENSBTAG00000000529	385	408	-15.77	tCATTTGTGTGACTTCAGAGgaaa	x||||||||x||xx|x||||xxxx	tGTAAACACCCTACACTCTCagct	BTBD9
bta-miR-6535	ENSBTAT00000078052	ENSBTAG00000000529	84	106	-31.18	gTCCCCCTCCCACACCCCCCTca	x||||||||x|x||x||x|||xx	tAGGGGGAGCG-GTTGGAGGAct	BTBD9
bta-miR-106a	ENSBTAT00000067169	ENSBTAG00000000545	670	691	-12.25	tTTTCACGACTAAAATTTCaat	x||||||||x|xxx|:x||xxx	aAAAGTGCTTACAGTGCAGgta	PPP4R3B
bta-miR-671	ENSBTAT00000000709	ENSBTAG00000000545	164	185	-14.87	cCCTTCGG-ACaaaaacaaaaaa	x|||||||x||xxxxxxxxxxxx	aGGAAGCCCTGgaggggctggag	PPP4R3B
bta-miR-671	ENSBTAT00000067169	ENSBTAG00000000545	164	185	-14.87	cCCTTCGG-ACaaaaacaaaaaa	x|||||||x||xxxxxxxxxxxx	aGGAAGCCCTGgaggggctggag	PPP4R3B
bta-miR-2431-3p	ENSBTAT00000067169	ENSBTAG00000000545	342	363	-22.93	tTGGGGGT-ACCTCGTTGGGGtg	x|||||||x|x|xx::||||:xx	cACCCCCACTTGCATGACCCTga	PPP4R3B
bta-miR-182	ENSBTAT00000000714	ENSBTAG00000000546	141	164	-14.09	cAACCGTTACTTTTTactacgtac	x|||||||||:x|:|xxxxxxxxx	tTTGGCAATGGTAGAactcacact	TOB1
bta-miR-92b	ENSBTAT00000000714	ENSBTAG00000000546	632	653	-11.88	aTAACGTGttatatccatgttt	x|||||||xxxxxxxxxxxxxx	tATTGCACtcgtcccggcctcc	TOB1
bta-miR-193a-5p	ENSBTAT00000000721	ENSBTAG00000000550	55	79	-22.43	aCCCAGAAGTACGGTCCGGTgggaa	x|||||||xx|||x:|||x|xxxxx	tGGGTCTT--TGC-GGGCGAgatga	ATP5F1D
bta-miR-6535	ENSBTAT00000000721	ENSBTAG00000000550	281	301	-20.12	gTCCCCCT-GTCGtaaggagcg	x|||||||x|:|:xxxxxxxxx	tAGGGGGAGCGGTtggaggact	ATP5F1D
bta-miR-31	ENSBTAT00000000731	ENSBTAG00000000555	347	367	-15.53	cCCGTTCTCTGCCTGCAcaca	x|||||||x:|x|:|x|xxxx	aGGCAAGATGCTGGCATagct	ACO1
bta-miR-181b	ENSBTAT00000000731	ENSBTAG00000000555	291	312	-21.18	tTGTAAGTCAC--TAGTCACTgga	x|||||||x||xx:||:|||:xxx	aACATTCATTGCTGTCGGTGGgtt	ACO1
bta-miR-181c	ENSBTAT00000000731	ENSBTAG00000000555	290	312	-20.91	tTGTAAGTC--ACTAGTCACTggaa	x|||||||xxx||x||:||||xxxx	aACATTCAACCTG-TCGGTGAgttt	ACO1
bta-miR-200a	ENSBTAT00000000731	ENSBTAG00000000555	431	452	-16.92	aTTGTGACC-ACCGcgtgtgtct	x|||||||xx|||:xxxxxxxxx	tAACACTGTCTGGTaacgatgtt	ACO1
bta-miR-2408	ENSBTAT00000000731	ENSBTAG00000000555	334	355	-15.78	cTGCACACAAGTGGACTTGtaa	x||||||||xx|x||x|:|xxx	cACGTGTGTG-AGCTCAGCcgg	ACO1
bta-miR-11991	ENSBTAT00000000731	ENSBTAG00000000555	687	707	-20.17	tACAAGACGTAGAGagaggtg	x|||||||:||||:xxxxxxx	aTGTTCTGTATCTTgattgta	ACO1
bta-miR-497	ENSBTAT00000000733	ENSBTAG00000000562	472	493	-15.03	aTCGTCGTGTAATGTgtataaa	x|||||||||x|:::xxxxxxx	cAGCAGCACACTGTGgtttgta	TOMM20
bta-miR-2370-5p	ENSBTAT00000000733	ENSBTAG00000000562	165	186	-11.46	aCCCTTTTTATTTattttgtct	x|||||||xx|||xxxxxxxxx	tGGGAAAATGAAAgttggttat	TOMM20
bta-miR-6119-5p	ENSBTAT00000000733	ENSBTAG00000000562	551	574	-10.01	cCTCCATTTATAGGTCTTAtgtag	x||||||||x|x::x||x|xxxxx	aGAGGTAAAAAATT-GATTtgact	TOMM20
bta-miR-148a	ENSBTAT00000000735	ENSBTAG00000000563	516	537	-16.91	aGTCACGTcggacgaagcggga	x|||||||xxxxxxxxxxxxxx	tCAGTGCActacagaactttgt	MYD88
bta-miR-192	ENSBTAT00000000735	ENSBTAG00000000563	737	758	-16.91	tACTGGATCGGGGTCT-TTGGtt	x|||||||xxxx:x||x|:||xx	cTGACCTATGAATTGACAGCCag	MYD88
bta-miR-497	ENSBTAT00000000735	ENSBTAG00000000563	425	446	-25.42	gTCGTCGTGGGACcagggtcgt	x||||||||x|||xxxxxxxxx	cAGCAGCACACTGtggtttgta	MYD88
bta-miR-152	ENSBTAT00000000735	ENSBTAG00000000563	519	537	-15.65	aGTCACGT-CGGAC--GAAgcg	x|||||||x|x|x|xx|||xxx	tCAGTGCATGACAGAACTTggg	MYD88
bta-miR-769	ENSBTAT00000000735	ENSBTAG00000000563	1287	1307	-17.6	tCTCTGGAT-TCTGGTACTggt	x|||||||xx:|:::x|||xxx	tGAGACCTCCGGGTTCTGAgct	MYD88
bta-miR-6535	ENSBTAT00000000735	ENSBTAG00000000563	478	502	-28.88	gTCCCCCTTCACCCCACACTCCaca	x|||||||xxx|x|||xx||||xxx	tAGGGGGA---GCGGTTGGAGGact	MYD88
bta-miR-10162-5p	ENSBTAT00000048711	ENSBTAG00000000563	238	261	-24.46	aCCTGTCCCGGAACCGCTCCGCtc	x|||||||x||xx|x||xx|:|xx	tGGACAGG-CCAAGCCGCTGTGca	MYD88
bta-miR-320a	ENSBTAT00000000738	ENSBTAG00000000565	273	294	-14.05	tTTTCGACCAAtaagaaaacaa	x||||||||x|xxxxxxxxxxx	aAAAGCTGGGTtgagagggcga	RFX7
bta-miR-30e-5p	ENSBTAT00000000738	ENSBTAG00000000565	1885	1906	-12.58	aCATTTGTTCC--CTAATCTTacc	x|||||||xxxxx||x|:|||xxx	tGTAAACATCCTTGACTGGAAgct	RFX7
bta-miR-200a	ENSBTAT00000000738	ENSBTAG00000000565	2385	2408	-20.82	aTTGTGACTTGGTCAAAGTTATgt	x|||||||xx|::||xx|:||:xx	tAACACTGT-CTGGTAACGATGtt	RFX7
bta-miR-30a-5p	ENSBTAT00000000738	ENSBTAG00000000565	1885	1906	-12.53	aCATTTGTTCC--CTAATCTTacc	x|||||||xxxxx||x|:|||xxx	tGTAAACATCCTCGACTGGAAgct	RFX7
bta-miR-144	ENSBTAT00000000738	ENSBTAG00000000565	2519	2540	-12.46	tTGTCATACGTTTTACAaattt	x|||||||xx|x:||||xxxxx	tACAGTATAGATGATGTactag	RFX7
bta-miR-146b	ENSBTAT00000000738	ENSBTAG00000000565	2800	2822	-18.86	tCTCTTGACTTTACG-ATgacgtt	x||||||||||x|x|x||xxxxxx	tGAGAACTGAATTCCATAggctgt	RFX7
bta-miR-2332	ENSBTAT00000000738	ENSBTAG00000000565	1449	1472	-13	aCCAAATTCTtattgaaatattta	x||||||||:xxxxxxxxxxxxxx	cGGTTTAAGGtcttggagacaaag	RFX7
bta-miR-2335	ENSBTAT00000000738	ENSBTAG00000000565	394	417	-13.1	tCTATTACGGTTGTTGTTGTTTta	x|||||||x::||xx:|||x:|xx	aGATAATGATGAC--TAACTGAat	RFX7
bta-miR-342	ENSBTAT00000064712	ENSBTAG00000000571	338	362	-22.97	cGAGTGTGTCgagccggtcgcctgt	x|||||||||xxxxxxxxxxxxxxx	tCTCACACAGaaatcgcacccatct	ARHGAP27
bta-miR-146b	ENSBTAT00000010092	ENSBTAG00000000571	198	218	-25.36	aCTCTTGAC---GGGTATTCccca	x||||||||xxx:|||||:|xxxx	tGAGAACTGAATTCCATAGGctgt	ARHGAP27
bta-miR-146b	ENSBTAT00000064712	ENSBTAG00000000571	1114	1134	-25.36	aCTCTTGAC---GGGTATTCccca	x||||||||xxx:|||||:|xxxx	tGAGAACTGAATTCCATAGGctgt	ARHGAP27
bta-miR-183	ENSBTAT00000010092	ENSBTAG00000000571	473	496	-15.21	cTACCGTGTCACGGCGCGTGTccc	x|||||||x|x|:x|xx:x||xxx	tATGGCACTG-GTAGAATTCActg	ARHGAP27
bta-miR-183	ENSBTAT00000064712	ENSBTAG00000000571	1389	1412	-15.21	cTACCGTGTCACGGCGCGTGTccc	x|||||||x|x|:x|xx:x||xxx	tATGGCACTG-GTAGAATTCActg	ARHGAP27
bta-miR-1291	ENSBTAT00000064712	ENSBTAG00000000571	268	295	-30.33	gCCGGGACCCGGTGACCGCGGGGCGaga	x|||||||xxxx||||xx|x||:||xxx	tGGCCCTG----ACTGAAGACCTGCagt	ARHGAP27
bta-miR-2370-5p	ENSBTAT00000010092	ENSBTAG00000000571	554	575	-14.89	cCCCTTTT-CGTTCAAGTCGAcg	x|||||||x|x|||||x:|:|xx	tGGGAAAATGAAAGTT-GGTTat	ARHGAP27
bta-miR-2370-5p	ENSBTAT00000064712	ENSBTAG00000000571	1470	1491	-14.89	cCCCTTTT-CGTTCAAGTCGAcg	x|||||||x|x|||||x:|:|xx	tGGGAAAATGAAAGTT-GGTTat	ARHGAP27
bta-miR-2431-3p	ENSBTAT00000010092	ENSBTAG00000000571	207	231	-21.57	tTGGGGGTGTCAAACTCTTGacggg	x||||||||xx||xx|x:||xxxxx	cACCCCCAC--TTGCATGACcctga	ARHGAP27
bta-miR-2431-3p	ENSBTAT00000064712	ENSBTAG00000000571	1123	1147	-21.57	tTGGGGGTGTCAAACTCTTGacggg	x||||||||xx||xx|x:||xxxxx	cACCCCCAC--TTGCATGACcctga	ARHGAP27
bta-miR-181b	ENSBTAT00000020129	ENSBTAG00000000579	284	305	-11.65	tTGTAAGTGA--ACAaataaaaat	x|||||||:|xx|||xxxxxxxxx	aACATTCATTGCTGTcggtgggtt	NIPBL
bta-miR-181c	ENSBTAT00000020129	ENSBTAG00000000579	283	305	-10.36	tTGTAAGT-GAACAaataaaaatt	x|||||||x|x|||xxxxxxxxxx	aACATTCAACCTGTcggtgagttt	NIPBL
bta-miR-192	ENSBTAT00000020129	ENSBTAG00000000579	518	541	-10.4	cACTGGATTATGTAGTTTTAGatg	x|||||||x|:x||::|x|x|xxx	cTGACCTA-TGAATTGACAGCcag	NIPBL
bta-miR-196a	ENSBTAT00000020129	ENSBTAG00000000579	560	581	-17.07	gTCCATCAGAcccctagggaaa	x|||||||:|xxxxxxxxxxxx	tAGGTAGTTTcatgttgttggg	NIPBL
bta-miR-148a	ENSBTAT00000009882	ENSBTAG00000000590	419	440	-14.42	gGTCACGTctcacatcctgtcg	x|||||||xxxxxxxxxxxxxx	tCAGTGCActacagaactttgt	POLE
bta-miR-497	ENSBTAT00000009882	ENSBTAG00000000590	229	250	-20.29	gTCGTCGTCTCACACAAGtagg	x|||||||x|x||||x|:xxxx	cAGCAGCACACTGTGGTTtgta	POLE
bta-miR-152	ENSBTAT00000009882	ENSBTAG00000000590	412	440	-19.61	gGTCACGTCTCACATCCTGTCGTGAtgag	x|||||||xxx||xxxx||||x|||xxxx	tCAGTGCA---TG----ACAGAACTtggg	POLE
bta-miR-671	ENSBTAT00000009882	ENSBTAG00000000590	388	410	-26.7	aCCTTCGGCCCCGACGCGtgagg	x|||||||xx||xx|x||xxxxx	aGGAAGCCCTGGAGGGGCtggag	POLE
bta-miR-1291	ENSBTAT00000009882	ENSBTAG00000000590	241	261	-22.72	cCCGGGAC-GTCGTC--GTCGTct	x|||||||x|x|x||xx|x|||xx	tGGCCCTGACTGAAGACCTGCAgt	POLE
bta-miR-574	ENSBTAT00000009882	ENSBTAG00000000590	221	243	-20.15	tCTCACACAAGTAGG-TCACTCtt	x||||||||x::|x:x||||x|xx	tGAGTGTGTGTGTGTGAGTGTGtg	POLE
bta-miR-200a	ENSBTAT00000000791	ENSBTAG00000000599	286	311	-17.71	tTTGTGACTCAAAGACTGT-GTTCCgt	x|||||||xxxx||||::|x|:|x|xx	tAACACTG----TCTGGTAACGATGtt	CCNI
bta-miR-6119-3p	ENSBTAT00000000791	ENSBTAG00000000599	114	142	-13.05	tGTTTAGTTGACCCAAAAAAGGAGAccga	x|||||||xxxxxx||||||x||||xxxx	gCAAATCA------TTTTTTACTCTccaa	CCNI
bta-miR-6535	ENSBTAT00000000791	ENSBTAG00000000599	982	1005	-23.45	gTCCCCCTAATTGACTAGTTCTtt	x|||||||xx:::||:xx|:||xx	tAGGGGGAGCGGTTGG--AGGAct	CCNI
bta-miR-31	ENSBTAT00000000860	ENSBTAG00000000602	340	359	-19.91	tCCGTTCTGCTGTTCT-TCgt	x|||||||:|x:::x|x||xx	aGGCAAGATGCTGGCATAGct	RXRB
bta-miR-1291	ENSBTAT00000000860	ENSBTAG00000000602	783	806	-25.72	gCCGGGACGGGAGTCGGGTCcggg	x|||||||x|:xx||x||x|xxxx	tGGCCCTGACTGAAGACCTGcagt	RXRB
bta-miR-6535	ENSBTAT00000000860	ENSBTAG00000000602	830	851	-29.17	gTCCCCCTCGACTTTGCCCTtt	x|||||||||x|xx:xx|||xx	tAGGGGGAGCGGTTGGAGGAct	RXRB
bta-miR-1291	ENSBTAT00000000799	ENSBTAG00000000607	371	393	-22.5	tCCGGGACC-AGGTCTCGAGGTtt	x|||||||xx|xx|||x||x||xx	tGGCCCTGACTGAAGACCTGCAgt	ABCF2
bta-miR-1291	ENSBTAT00000068255	ENSBTAG00000000607	371	393	-22.5	tCCGGGACC-AGGTCTCGAGGTtt	x|||||||xx|xx|||x||x||xx	tGGCCCTGACTGAAGACCTGCAgt	ABCF2
bta-miR-1291	ENSBTAT00000073665	ENSBTAG00000000607	371	393	-22.5	tCCGGGACC-AGGTCTCGAGGTtt	x|||||||xx|xx|||x||x||xx	tGGCCCTGACTGAAGACCTGCAgt	ABCF2
bta-miR-10162-5p	ENSBTAT00000000799	ENSBTAG00000000607	114	138	-32.79	gCCTGTCCAGGACAGGTCGACACct	x|||||||x|xx|x||x||||||xx	tGGACAGGCCAAG-CC-GCTGTGca	ABCF2
bta-miR-10162-5p	ENSBTAT00000068255	ENSBTAG00000000607	114	138	-32.79	gCCTGTCCAGGACAGGTCGACACct	x|||||||x|xx|x||x||||||xx	tGGACAGGCCAAG-CC-GCTGTGca	ABCF2
bta-miR-10162-5p	ENSBTAT00000073665	ENSBTAG00000000607	114	138	-32.79	gCCTGTCCAGGACAGGTCGACACct	x|||||||x|xx|x||x||||||xx	tGGACAGGCCAAG-CC-GCTGTGca	ABCF2
bta-miR-497	ENSBTAT00000000805	ENSBTAG00000000613	507	533	-18.36	cTCGTCGTCCACCGTTACCCTGGACga	x|||||||xxxxx||x||x|:::||xx	cAGCAGCA-----CACTGTGGTTTGta	ELAVL1
bta-miR-146b	ENSBTAT00000000805	ENSBTAG00000000613	1091	1114	-10.41	tCTCTTGAaactcccaattagaaa	x|||||||xxxxxxxxxxxxxxxx	tGAGAACTgaattccataggctgt	ELAVL1
bta-miR-1291	ENSBTAT00000000805	ENSBTAG00000000613	1442	1465	-28.62	cCCGGGACGGACAAATGGAgagtc	x|||||||x|||xxx||||xxxxx	tGGCCCTGACTGAAGACCTgcagt	ELAVL1
bta-miR-2303	ENSBTAT00000000805	ENSBTAG00000000613	1285	1303	-15.12	gGACTTACGAC--CCGACaga	x|||||||x||xx|x|||xxx	tCTGAATGATGTCGACTGatg	ELAVL1
bta-miR-2370-5p	ENSBTAT00000000805	ENSBTAG00000000613	1385	1406	-11.28	cCCCTTTTtggggtggacacgc	x|||||||xxxxxxxxxxxxxx	tGGGAAAAtgaaagttggttat	ELAVL1
bta-miR-2408	ENSBTAT00000000805	ENSBTAG00000000613	762	781	-13.91	tTGCACAC-CTgtccttaagc	x|||||||x||xxxxxxxxxx	cACGTGTGTGAgctcagccgg	ELAVL1
bta-miR-10162-5p	ENSBTAT00000000805	ENSBTAG00000000613	755	775	-21.77	aCCTGTCC--TTAAGCCCCACag	x|||||||xx||xx||xx|||xx	tGGACAGGCCAAGCCGCTGTGca	ELAVL1
bta-miR-2285bf	ENSBTAT00000000805	ENSBTAG00000000613	424	445	-13.72	tTTTGTGCGTGAGTCGTAGAca	x|||||||x||xx|x|x|:|xx	aAAACACGAACAAA-CTTTTtg	ELAVL1
bta-miR-1291	ENSBTAT00000000809	ENSBTAG00000000616	15	37	-17.64	cCCGGGACCG-TGTCTaccattgc	x|||||||x|x:x|||xxxxxxxx	tGGCCCTGACTGAAGAcctgcagt	GPR161
bta-miR-1291	ENSBTAT00000068118	ENSBTAG00000000616	15	37	-17.64	cCCGGGACCG-TGTCTaccattgc	x|||||||x|x:x|||xxxxxxxx	tGGCCCTGACTGAAGAcctgcagt	GPR161
bta-miR-92b	ENSBTAT00000081089	ENSBTAG00000000625	176	196	-12.83	gTAACGTG-GTATGtatttatt	x|||||||x|:|x|xxxxxxxx	tATTGCACTCGTCCcggcctcc	SMAD6
bta-miR-183	ENSBTAT00000000830	ENSBTAG00000000629	29	52	-13.62	tTACCGTGTTTCACCGAAAtccat	x|||||||x:x||x|xx||xxxxx	tATGGCACTG-GTAGAATTcactg	MMS22L
bta-miR-196a	ENSBTAT00000000830	ENSBTAG00000000629	11	34	-21.08	aTCCATCAATATTAATTACAACtc	x||||||||x|x||x:x|||||xx	tAGGTAGTT-TCAT-GTTGTTGgg	MMS22L
bta-miR-320a	ENSBTAT00000070156	ENSBTAG00000000630	797	817	-12.41	cTTTCGACATA-CTagttaggt	x|||||||x:|x||xxxxxxxx	aAAAGCTGGGTTGAgagggcga	LSM14A
bta-let-7d	ENSBTAT00000070156	ENSBTAG00000000630	666	687	-22.8	tCTCCATCGTCCTTCCTTTCct	x|||||||:|||xx|x|x||xx	aGAGGTAGTAGGTTGCATAGtt	LSM14A
bta-let-7g	ENSBTAT00000070156	ENSBTAG00000000630	666	687	-16.48	tCTCCATCGTCCTTCCTTTCct	x|||||||:||xxx|x|x||xx	tGAGGTAGTAGTTTGTACAGtt	LSM14A
bta-let-7a-5p	ENSBTAT00000070156	ENSBTAG00000000630	666	687	-20.93	tCTCCATCGTCCTTCCTTTCct	x|||||||:|||xx|x|x||xx	tGAGGTAGTAGGTTGTATAGtt	LSM14A
bta-let-7b	ENSBTAT00000070156	ENSBTAG00000000630	666	687	-22.6	tCTCCATCGTCCttcctttcct	x|||||||:|||xxxxxxxxxx	tGAGGTAGTAGGttgtgtggtt	LSM14A
bta-let-7e	ENSBTAT00000070156	ENSBTAG00000000630	667	687	-18.85	tCTCCATCGTCCTTCCTTTcc	x|||||||x|||xx|x|x|xx	tGAGGTAGGAGGTTGTATAgt	LSM14A
bta-miR-497	ENSBTAT00000070156	ENSBTAG00000000630	508	529	-14.75	aTCGTCGTCGT-ATATTttatta	x|||||||x||x|:|::xxxxxx	cAGCAGCA-CACTGTGGtttgta	LSM14A
bta-miR-144	ENSBTAT00000000831	ENSBTAG00000000630	589	612	-13.44	tTGTCATAAATGACACACATGtat	x|||||||xx|x||xx|||||xxx	tACAGTATAGA-TGA-TGTACtag	LSM14A
bta-miR-182	ENSBTAT00000000831	ENSBTAG00000000630	648	671	-17.81	aAACCGTTACCTTATattacctta	x||||||||||x|x|xxxxxxxxx	tTTGGCAATGGTAGAactcacact	LSM14A
bta-miR-92b	ENSBTAT00000070156	ENSBTAG00000000630	84	106	-17.61	gTAACGTGAAGTAGAGACtcttt	x||||||||x|:||x|x|xxxxx	tATTGCACT-CGTCCCGGcctcc	LSM14A
bta-miR-2431-3p	ENSBTAT00000000831	ENSBTAG00000000630	162	184	-21.79	gTGGGGGTtttcattgacgtaac	x|||||||xxxxxxxxxxxxxxx	cACCCCCActtgcatgaccctga	LSM14A
bta-miR-6535	ENSBTAT00000070156	ENSBTAG00000000630	680	700	-27.88	cTCCCCCTCTGTC--TCTCCatc	x||||||||x|:|xx:||||xxx	tAGGGGGAG-CGGTTGGAGGact	LSM14A
bta-miR-6535	ENSBTAT00000000833	ENSBTAG00000000632	19	41	-21.17	tTCCCCCTTCGTTtcattgcagt	x|||||||x||::xxxxxxxxxx	tAGGGGGA-GCGGttggaggact	RAD54B
bta-miR-148a	ENSBTAT00000000842	ENSBTAG00000000640	186	209	-14.81	aGTCACGTCGCACTGA-TTGAcgtt	x|||||||x|x|x||xx||||xxxx	tCAGTGCA-C-T-ACAGAACTttgt	SELENOS
bta-miR-320a	ENSBTAT00000000842	ENSBTAG00000000640	555	576	-14.75	tTTTCGACATAATACaatctgt	x|||||||x:||:x|xxxxxxx	aAAAGCTGGGTTGAGagggcga	SELENOS
bta-miR-152	ENSBTAT00000000842	ENSBTAG00000000640	186	209	-19.93	aGTCACGTCGCACTGA-TTGAcgtt	x|||||||xxx||||xx||||xxxx	tCAGTGCA---TGACAGAACTtggg	SELENOS
bta-miR-671	ENSBTAT00000000842	ENSBTAG00000000640	246	267	-22.86	aCCTTCGGGAA-TCGATGGTTga	x|||||||||xx||xx:|:::xx	aGGAAGCCCTGGAGGGGCTGGag	SELENOS
bta-miR-1291	ENSBTAT00000000845	ENSBTAG00000000642	38	62	-21.21	tCCGGGACCCGCACCCGAGGCtcac	x|||||||xx:|xx|x|x|:|xxxx	tGGCCCTGACTGAAGAC-CTGcagt	INTS1
bta-miR-1291	ENSBTAT00000000851	ENSBTAG00000000647	28	49	-25.7	aCCGGGACC--CCAGAGGACGcgc	x|||||||xxx|xxxx|||||xxx	tGGCCCTGACTGAAGACCTGCagt	SELENOO
bta-miR-1291	ENSBTAT00000079811	ENSBTAG00000000647	28	49	-25.7	aCCGGGACC--CCAGAGGACGcgc	x|||||||xxx|xxxx|||||xxx	tGGCCCTGACTGAAGACCTGCagt	SELENOO
bta-miR-192	ENSBTAT00000000857	ENSBTAG00000000655	401	424	-12.62	aACTGGATTGTGTCACctaattcc	x|||||||xx|x|x||xxxxxxxx	cTGACCTATGA-ATTGacagccag	MIPOL1
bta-miR-192	ENSBTAT00000067965	ENSBTAG00000000655	401	424	-12.62	aACTGGATTGTGTCACctaattcc	x|||||||xx|x|x||xxxxxxxx	cTGACCTATGA-ATTGacagccag	MIPOL1
bta-miR-192	ENSBTAT00000069719	ENSBTAG00000000655	401	424	-12.62	aACTGGATTGTGTCACctaattcc	x|||||||xx|x|x||xxxxxxxx	cTGACCTATGA-ATTGacagccag	MIPOL1
bta-miR-192	ENSBTAT00000075625	ENSBTAG00000000655	401	424	-12.62	aACTGGATTGTGTCACctaattcc	x|||||||xx|x|x||xxxxxxxx	cTGACCTATGA-ATTGacagccag	MIPOL1
bta-miR-192	ENSBTAT00000078746	ENSBTAG00000000655	401	424	-12.62	aACTGGATTGTGTCACctaattcc	x|||||||xx|x|x||xxxxxxxx	cTGACCTATGA-ATTGacagccag	MIPOL1
bta-miR-497	ENSBTAT00000000857	ENSBTAG00000000655	166	185	-22.7	gTCGTCGTTT--CACCAAtttg	x|||||||x|xx||||||xxxx	cAGCAGCACACTGTGGTTtgta	MIPOL1
bta-miR-497	ENSBTAT00000067965	ENSBTAG00000000655	166	185	-22.7	gTCGTCGTTT--CACCAAtttg	x|||||||x|xx||||||xxxx	cAGCAGCACACTGTGGTTtgta	MIPOL1
bta-miR-497	ENSBTAT00000069719	ENSBTAG00000000655	166	185	-22.7	gTCGTCGTTT--CACCAAtttg	x|||||||x|xx||||||xxxx	cAGCAGCACACTGTGGTTtgta	MIPOL1
bta-miR-497	ENSBTAT00000075625	ENSBTAG00000000655	166	185	-22.7	gTCGTCGTTT--CACCAAtttg	x|||||||x|xx||||||xxxx	cAGCAGCACACTGTGGTTtgta	MIPOL1
bta-miR-497	ENSBTAT00000078746	ENSBTAG00000000655	166	185	-22.7	gTCGTCGTTT--CACCAAtttg	x|||||||x|xx||||||xxxx	cAGCAGCACACTGTGGTTtgta	MIPOL1
bta-miR-106a	ENSBTAT00000000862	ENSBTAG00000000660	493	513	-15.33	tTTTCACGG-TCTCTCCCCCtt	x|||||||:x|x||x|xx||xx	aAAAGTGCTTACAGTGCAGGta	FAM83D
bta-miR-769	ENSBTAT00000000862	ENSBTAG00000000660	726	747	-20.03	tCTCTGGACTCTAACGACcgtt	x|||||||xx|:x|x|||xxxx	tGAGACCTCCGGGTTCTGagct	FAM83D
bta-miR-2303	ENSBTAT00000000862	ENSBTAG00000000660	1	21	-14.63	aGACTTACGTACCTCGGtagt-	x|||||||x|||xx|x|xxxxx	tCTGAATG-ATGTCGACtgatg	FAM83D
bta-miR-2370-5p	ENSBTAT00000000862	ENSBTAG00000000660	477	498	-13.19	cCCCTTTTTTTTTTctgtgctc	x|||||||x:|||:xxxxxxxx	tGGGAAAATGAAAGttggttat	FAM83D
bta-miR-6535	ENSBTAT00000000862	ENSBTAG00000000660	480	501	-21.87	cTCCCCCTTTTTTTTTTCTgtg	x|||||||:x::xx::||:xxx	tAGGGGGAGCGGTTGGAGGact	FAM83D
bta-miR-10162-5p	ENSBTAT00000000862	ENSBTAG00000000660	72	91	-16.5	tCCTGTCC---TCTGTAAGACct	x|||||||xxx||x|:x|x||xx	tGGACAGGCCAAGCCGCTGTGca	FAM83D
bta-miR-193a-5p	ENSBTAT00000000872	ENSBTAG00000000662	198	219	-16.08	aCCCAGAAAgaaaggacaccac	x||||||||xxxxxxxxxxxxx	tGGGTCTTTgcgggcgagatga	TCF20
bta-miR-193a-5p	ENSBTAT00000083362	ENSBTAG00000000662	136	157	-16.08	aCCCAGAAAgaaaggacaccac	x||||||||xxxxxxxxxxxxx	tGGGTCTTTgcgggcgagatga	TCF20
bta-miR-2285bf	ENSBTAT00000000872	ENSBTAG00000000662	644	664	-13.81	tTTTGTGCCTGGTAGGGGGtg	x|||||||x||x|x|::::xx	aAAACACGAACAAACTTTTtg	TCF20
bta-miR-2285bf	ENSBTAT00000079986	ENSBTAG00000000662	352	372	-13.81	tTTTGTGCCTGGTAGGGGGtg	x|||||||x||x|x|::::xx	aAAACACGAACAAACTTTTtg	TCF20
bta-miR-2285bf	ENSBTAT00000083362	ENSBTAG00000000662	582	602	-13.81	tTTTGTGCCTGGTAGGGGGtg	x|||||||x||x|x|::::xx	aAAACACGAACAAACTTTTtg	TCF20
bta-miR-320a	ENSBTAT00000000876	ENSBTAG00000000666	356	377	-17.15	gTTTCGACTCCAGACACCAGtg	x|||||||:|x|xx|x||x|xx	aAAAGCTGGGTTGAGAGGGCga	GHDC
bta-miR-10162-5p	ENSBTAT00000000876	ENSBTAG00000000666	487	509	-13.69	cCCTGTCCTCTCTGTCcttcttt	x|||||||xx|x:|x|xxxxxxx	tGGACAGGCCAAGCCGctgtgca	GHDC
bta-miR-30e-5p	ENSBTAT00000035731	ENSBTAG00000000668	630	653	-17.85	aCATTTGTTCAGATGGGTCATCgg	x|||||||xxx:|:x|::|x||xx	tGTAAACATCCTTGACTGGAAGct	SLC22A5
bta-miR-30a-5p	ENSBTAT00000035731	ENSBTAG00000000668	630	653	-17.97	aCATTTGTTC-AGATGGGTCATCgg	x|||||||xxx||x||:x:|x||xx	tGTAAACATCCTCGACT-GGAAGct	SLC22A5
bta-miR-342	ENSBTAT00000035731	ENSBTAG00000000668	713	737	-17.25	tGAGTGTGTCGTCACCTTTTGTtca	x|||||||||x|x|x|x|xx||xxx	tCTCACACAGAAATCGCACCCAtct	SLC22A5
bta-miR-196a	ENSBTAT00000035731	ENSBTAG00000000668	320	341	-15.45	aTCCATCAGACTTTAATtttac	x|||||||:|x|x:||:xxxxx	tAGGTAGTTTCATGTTGttggg	SLC22A5
bta-miR-30f	ENSBTAT00000035731	ENSBTAG00000000668	629	653	-16.69	aCATTTGTTCAGATGGGtcatcggt	x|||||||xxx||||x|xxxxxxxx	tGTAAACACC-CTACACtctcagct	SLC22A5
bta-miR-769	ENSBTAT00000035731	ENSBTAG00000000668	725	746	-16.25	cCTCTGGActgagtgtgtcgtc	x|||||||xxxxxxxxxxxxxx	tGAGACCTccgggttctgagct	SLC22A5
bta-miR-2370-5p	ENSBTAT00000035731	ENSBTAG00000000668	394	415	-11.2	cCCCTTTTGTACAAAACacccc	x|||||||::xxxx|||xxxxx	tGGGAAAATGAAAGTTGgttat	SLC22A5
bta-miR-11991	ENSBTAT00000035731	ENSBTAG00000000668	568	587	-15.02	cACAAGACATA-AACGAGTca	x||||||||||x|||x|::xx	aTGTTCTGTATCTTGATTGta	SLC22A5
bta-miR-106a	ENSBTAT00000000897	ENSBTAG00000000675	362	383	-10.71	gTTTCACGTATTATCTGTTTct	x|||||||x||xx:x:||::xx	aAAAGTGCTTACAGTGCAGGta	PGS1
bta-miR-10a	ENSBTAT00000072446	ENSBTAG00000000675	305	326	-23.84	gTGGGACA-CGAGGgcggacgag	x|||||||x|x|||xxxxxxxxx	tACCCTGTAGATCCgaatttgtg	PGS1
bta-miR-30e-5p	ENSBTAT00000000897	ENSBTAG00000000675	748	771	-21.45	aCATTTGTGGGTGGTGATTccccg	x|||||||:||x:x|||::xxxxx	tGTAAACATCCTTGACTGGaagct	PGS1
bta-miR-10b	ENSBTAT00000072446	ENSBTAG00000000675	304	326	-23.25	gTGGGACACGAGGGCggacgagc	x|||||||xxxx|||xxxxxxxx	tACCCTGTAGAACCGaatttgtg	PGS1
bta-miR-30a-5p	ENSBTAT00000000897	ENSBTAG00000000675	748	771	-23.39	aCATTTGTGGGTGGTGATTccccg	x|||||||:||x|x|||::xxxxx	tGTAAACATCCTCGACTGGaagct	PGS1
bta-miR-497	ENSBTAT00000000897	ENSBTAG00000000675	236	255	-21.14	gTCGTCGT-TGCC-CGAAATtg	x|||||||x||x|x|x|||:xx	cAGCAGCACACTGTGGTTTGta	PGS1
bta-miR-497	ENSBTAT00000072446	ENSBTAG00000000675	537	558	-16.8	gTCGTCGTccatcttctccgtc	x|||||||xxxxxxxxxxxxxx	cAGCAGCAcactgtggtttgta	PGS1
bta-miR-30f	ENSBTAT00000000897	ENSBTAG00000000675	748	771	-24.06	aCATTTGTGGGTGGTGAttccccg	x||||||||||xx||||xxxxxxx	tGTAAACACCCTACACTctcagct	PGS1
bta-miR-451	ENSBTAT00000000897	ENSBTAG00000000675	301	323	-14.75	aTTGGCAATGtccgcgtggattt	x|||||||||xxxxxxxxxxxxx	aAACCGTTACcattactgagttt	PGS1
bta-miR-2408	ENSBTAT00000000897	ENSBTAG00000000675	1586	1607	-27	gTGCACACCACTAGGGTCacgg	x|||||||x|||x|:|||xxxx	cACGTGTG-TGAGCTCAGccgg	PGS1
bta-miR-2431-3p	ENSBTAT00000000897	ENSBTAG00000000675	858	879	-21.18	tTGGGGGTTTAGG-ACTGaaggg	x|||||||xx|x|x||||xxxxx	cACCCCCACTTGCATGACcctga	PGS1
bta-miR-2431-3p	ENSBTAT00000072446	ENSBTAG00000000675	746	768	-27.52	gTGGGGGTTGAGGGACGGTGGtg	x|||||||x:|x|x||x|x|:xx	cACCCCCACTTGCATGACCCTga	PGS1
bta-miR-10162-5p	ENSBTAT00000000897	ENSBTAG00000000675	1765	1789	-26.03	gCCTGTCCTGTCTGCGGTGTCCCct	x|||||||x||x|x|||:|x|x|xx	tGGACAGGCCA-A-GCCGCTGTGca	PGS1
bta-miR-2285bf	ENSBTAT00000000897	ENSBTAG00000000675	1293	1313	-10.62	tTTTGTGCGTaggcaccaggg	x|||||||x|xxxxxxxxxxx	aAAACACGAAcaaactttttg	PGS1
bta-miR-497	ENSBTAT00000000901	ENSBTAG00000000678	774	797	-23.95	gTCGTCGTTCAAACACGTAAGCag	x|||||||xxx|x|||x:||:|xx	cAGCAGCACACT-GTG-GTTTGta	CSDE1
bta-miR-1296	ENSBTAT00000000901	ENSBTAG00000000678	323	348	-13.41	tATCCCGGTTGTTCAATTGTCAGAta	x|||||||xx|x:|x|xx||x|||xx	tTAGGGCC--CTGGCTC-CA-TCTcc	CSDE1
bta-miR-30e-5p	ENSBTAT00000000902	ENSBTAG00000000679	96	117	-14.2	aCATTTGTAATAAT--ACTTggac	x||||||||xx||:xx||:|xxxx	tGTAAACATCCTTGACTGGAagct	PGM3
bta-miR-30e-5p	ENSBTAT00000071281	ENSBTAG00000000679	96	117	-14.2	aCATTTGTAATAAT--ACTTggac	x||||||||xx||:xx||:|xxxx	tGTAAACATCCTTGACTGGAagct	PGM3
bta-miR-30a-5p	ENSBTAT00000000902	ENSBTAG00000000679	94	117	-12.54	aCATTTGTAataatacttggacag	x||||||||xxxxxxxxxxxxxxx	tGTAAACATcctcgactggaagct	PGM3
bta-miR-30a-5p	ENSBTAT00000071281	ENSBTAG00000000679	94	117	-12.54	aCATTTGTAataatacttggacag	x||||||||xxxxxxxxxxxxxxx	tGTAAACATcctcgactggaagct	PGM3
bta-miR-106a	ENSBTAT00000000906	ENSBTAG00000000683	582	603	-10.47	aTTTCACGAAATTTAaaatgaa	x|||||||||xx|:|xxxxxxx	aAAAGTGCTTACAGTgcaggta	WDR37
bta-miR-191	ENSBTAT00000000906	ENSBTAG00000000683	148	166	-15.56	tTTGCCTT----TCTTCGTTGtc	x|||||||xxxx|x|||||:|xx	cAACGGAATCCCAAAAGCAGCtg	WDR37
bta-miR-10162-5p	ENSBTAT00000000906	ENSBTAG00000000683	290	314	-27.25	gCCTGTCCGTGTGTACGTGGTAgcg	x||||||||x||x|xx|:|::|xxx	tGGACAGGC-CA-AGCCGCTGTgca	WDR37
bta-miR-200a	ENSBTAT00000067157	ENSBTAG00000000684	289	311	-10.15	tTTGTGACtttaacaaaaaaaga	x|||||||xxxxxxxxxxxxxxx	tAACACTGtctggtaacgatgtt	ARHGEF10L
bta-miR-200a	ENSBTAT00000077840	ENSBTAG00000000684	289	311	-10.15	tTTGTGACtttaacaaaaaaaga	x|||||||xxxxxxxxxxxxxxx	tAACACTGtctggtaacgatgtt	ARHGEF10L
bta-miR-200a	ENSBTAT00000079427	ENSBTAG00000000684	289	311	-10.15	tTTGTGACtttaacaaaaaaaga	x|||||||xxxxxxxxxxxxxxx	tAACACTGtctggtaacgatgtt	ARHGEF10L
bta-miR-200a	ENSBTAT00000081447	ENSBTAG00000000684	289	311	-10.15	tTTGTGACtttaacaaaaaaaga	x|||||||xxxxxxxxxxxxxxx	tAACACTGtctggtaacgatgtt	ARHGEF10L
bta-miR-200a	ENSBTAT00000086843	ENSBTAG00000000684	289	311	-10.15	tTTGTGACtttaacaaaaaaaga	x|||||||xxxxxxxxxxxxxxx	tAACACTGtctggtaacgatgtt	ARHGEF10L
bta-miR-342	ENSBTAT00000067157	ENSBTAG00000000684	481	502	-28	tGAGTGTG-CGT--GTGTGGGGAgg	x|||||||x|x|xx|:|||||x|xx	tCTCACACAGAAATCGCACCCATct	ARHGEF10L
bta-miR-342	ENSBTAT00000077840	ENSBTAG00000000684	481	502	-28	tGAGTGTG-CGT--GTGTGGGGAgg	x|||||||x|x|xx|:|||||x|xx	tCTCACACAGAAATCGCACCCATct	ARHGEF10L
bta-miR-342	ENSBTAT00000079427	ENSBTAG00000000684	481	502	-28	tGAGTGTG-CGT--GTGTGGGGAgg	x|||||||x|x|xx|:|||||x|xx	tCTCACACAGAAATCGCACCCATct	ARHGEF10L
bta-miR-342	ENSBTAT00000081447	ENSBTAG00000000684	481	502	-28	tGAGTGTG-CGT--GTGTGGGGAgg	x|||||||x|x|xx|:|||||x|xx	tCTCACACAGAAATCGCACCCATct	ARHGEF10L
bta-miR-342	ENSBTAT00000086843	ENSBTAG00000000684	481	502	-28	tGAGTGTG-CGT--GTGTGGGGAgg	x|||||||x|x|xx|:|||||x|xx	tCTCACACAGAAATCGCACCCATct	ARHGEF10L
bta-miR-181c	ENSBTAT00000000919	ENSBTAG00000000687	882	905	-13.02	aTGTAAGTccatggttttagtggg	x|||||||xxxxxxxxxxxxxxxx	aACATTCAacctgtcggtgagttt	POC1B
bta-miR-6119-5p	ENSBTAT00000000919	ENSBTAG00000000687	420	442	-15.64	tCTCCATTCACTTAA-TAAAGTgg	x|||||||xxx||||x||||x|xx	aGAGGTAAAA-AATTGATTTGAct	POC1B
bta-miR-11991	ENSBTAT00000000919	ENSBTAG00000000687	118	138	-11.95	aACAAGACAACGAGTgggaaa	x||||||||xx||::xxxxxx	aTGTTCTGTATCTTGattgta	POC1B
bta-miR-11991	ENSBTAT00000067805	ENSBTAG00000000687	118	138	-11.95	aACAAGACAACGAGTgggaaa	x||||||||xx||::xxxxxx	aTGTTCTGTATCTTGattgta	POC1B
bta-miR-11991	ENSBTAT00000076347	ENSBTAG00000000687	118	138	-11.95	aACAAGACAACGAGTgggaaa	x||||||||xx||::xxxxxx	aTGTTCTGTATCTTGattgta	POC1B
bta-miR-11991	ENSBTAT00000079434	ENSBTAG00000000687	118	138	-11.95	aACAAGACAACGAGTgggaaa	x||||||||xx||::xxxxxx	aTGTTCTGTATCTTGattgta	POC1B
bta-miR-181b	ENSBTAT00000000938	ENSBTAG00000000699	248	272	-18.06	tTGTAAGTCCTAGAACTCTACCaag	x|||||||xx:x||xxx|:|||xxx	aACATTCATTG-CTGTCGGTGGgtt	AOPEP
bta-miR-181b	ENSBTAT00000065565	ENSBTAG00000000699	248	272	-18.06	tTGTAAGTCCTAGAACTCTACCaag	x|||||||xx:x||xxx|:|||xxx	aACATTCATTG-CTGTCGGTGGgtt	AOPEP
bta-miR-30e-5p	ENSBTAT00000000938	ENSBTAG00000000699	1100	1122	-14.25	cCATTTGTTTCGTGTG-TCTTCgt	x|||||||xxx:xx||x:||||xx	tGTAAACATCCTTGACTGGAAGct	AOPEP
bta-miR-30e-5p	ENSBTAT00000065565	ENSBTAG00000000699	1100	1122	-14.25	cCATTTGTTTCGTGTG-TCTTCgt	x|||||||xxx:xx||x:||||xx	tGTAAACATCCTTGACTGGAAGct	AOPEP
bta-miR-181c	ENSBTAT00000000938	ENSBTAG00000000699	248	272	-14.91	tTGTAAGTCCTAGAACTCTAC-CAag	x|||||||xx|x||xxx|:||x||xx	aACATTCA--ACCTGTCGGTGAGTtt	AOPEP
bta-miR-181c	ENSBTAT00000065565	ENSBTAG00000000699	248	272	-14.91	tTGTAAGTCCTAGAACTCTAC-CAag	x|||||||xx|x||xxx|:||x||xx	aACATTCA--ACCTGTCGGTGAGTtt	AOPEP
bta-miR-191	ENSBTAT00000000938	ENSBTAG00000000699	1022	1046	-11.58	tTTGCCTTTCAGTGACCACGTatta	x|||||||xx||x|xxxx|||xxxx	cAACGGAA--TCCCAAAAGCAgctg	AOPEP
bta-miR-191	ENSBTAT00000065565	ENSBTAG00000000699	1022	1046	-11.58	tTTGCCTTTCAGTGACCACGTatta	x|||||||xx||x|xxxx|||xxxx	cAACGGAA--TCCCAAAAGCAgctg	AOPEP
bta-miR-30a-5p	ENSBTAT00000000938	ENSBTAG00000000699	1100	1122	-14.59	cCATTTGTTTCGTGTG-TCTTCgt	x|||||||xxx:xx||x:||||xx	tGTAAACATCCTCGACTGGAAGct	AOPEP
bta-miR-30a-5p	ENSBTAT00000065565	ENSBTAG00000000699	1100	1122	-14.59	cCATTTGTTTCGTGTG-TCTTCgt	x|||||||xxx:xx||x:||||xx	tGTAAACATCCTCGACTGGAAGct	AOPEP
bta-miR-497	ENSBTAT00000000938	ENSBTAG00000000699	1052	1073	-18.96	tTCGTCGTTTGGGGCCctctga	x|||||||x||:x:||xxxxxx	cAGCAGCACACTGTGGtttgta	AOPEP
bta-miR-497	ENSBTAT00000065565	ENSBTAG00000000699	1052	1073	-18.96	tTCGTCGTTTGGGGCCctctga	x|||||||x||:x:||xxxxxx	cAGCAGCACACTGTGGtttgta	AOPEP
bta-miR-30f	ENSBTAT00000000938	ENSBTAG00000000699	1099	1122	-14.02	cCATTTGTTTCGTGTGtcttcgtt	x|||||||xxx:||||xxxxxxxx	tGTAAACACCCTACACtctcagct	AOPEP
bta-miR-30f	ENSBTAT00000065565	ENSBTAG00000000699	1099	1122	-14.02	cCATTTGTTTCGTGTGtcttcgtt	x|||||||xxx:||||xxxxxxxx	tGTAAACACCCTACACtctcagct	AOPEP
bta-miR-6119-5p	ENSBTAT00000000938	ENSBTAG00000000699	648	670	-12.96	cCTCCATTCTTTTCCTCTGTTct	x|||||||x|||xx||xx::|xx	aGAGGTAAAAAATTGATTTGAct	AOPEP
bta-miR-6119-5p	ENSBTAT00000065565	ENSBTAG00000000699	648	670	-12.96	cCTCCATTCTTTTCCTCTGTTct	x|||||||x|||xx||xx::|xx	aGAGGTAAAAAATTGATTTGAct	AOPEP
bta-miR-192	ENSBTAT00000081787	ENSBTAG00000000700	571	596	-17.3	gACTGGATCGGACGGAACacgactct	x|||||||xxx||xx|||xxxxxxxx	cTGACCTA---TGAATTGacagccag	PARVA
bta-miR-2335	ENSBTAT00000081787	ENSBTAG00000000700	851	873	-10.75	gCTATTACTTAGTTCCTGAATaa	x||||||||x|x|xxx|||x|xx	aGATAATGA-TGACTAACTGAat	PARVA
bta-miR-148a	ENSBTAT00000000941	ENSBTAG00000000704	84	104	-14.64	tGTCACGTCCT-TTGTGAAcga	x|||||||xx|x|:x||||xxx	tCAGTGCACTACAGAACTTtgt	GUSB
bta-miR-193a-5p	ENSBTAT00000000941	ENSBTAG00000000704	256	277	-13.8	cCCCAGAATCaaagagttggtc	x|||||||x|xxxxxxxxxxxx	tGGGTCTTTGcgggcgagatga	GUSB
bta-miR-152	ENSBTAT00000000941	ENSBTAG00000000704	84	104	-19.3	tGTCACGTCCT-TTGTGAACga	x|||||||x||x|:x|||||xx	tCAGTGCATGACAGAACTTGgg	GUSB
bta-miR-106a	ENSBTAT00000000943	ENSBTAG00000000705	591	613	-19.02	aTTTCACGTTGTGATTTGTCCac	x|||||||xx:||x:x:||||xx	aAAAGTGCT-TACAGTGCAGGta	COX7A2L
bta-miR-143	ENSBTAT00000000943	ENSBTAG00000000705	509	529	-22.54	aCTCTACTGCGTT-TATTGGga	x|||||||x|||xx:||:|:xx	tGAGATGAAGCACTGTAGCTcg	COX7A2L
bta-miR-2303	ENSBTAT00000000943	ENSBTAG00000000705	175	195	-13.32	cGACTTACTCGAGaccgtccg	x||||||||xx||xxxxxxxx	tCTGAATGATGTCgactgatg	COX7A2L
bta-miR-320a	ENSBTAT00000070422	ENSBTAG00000000710	1068	1092	-16.69	gTTTCGACAGTCGAGGTCGTCGGcg	x|||||||xxx|x|:x||x:|x|xx	aAAAGCTG---GGTTGAGAGGGCga	PIP5K1C
bta-miR-320a	ENSBTAT00000072989	ENSBTAG00000000710	1068	1092	-16.69	gTTTCGACAGTCGAGGTCGTCGGcg	x|||||||xxx|x|:x||x:|x|xx	aAAAGCTG---GGTTGAGAGGGCga	PIP5K1C
bta-miR-320a	ENSBTAT00000076329	ENSBTAG00000000710	1068	1092	-16.69	gTTTCGACAGTCGAGGTCGTCGGcg	x|||||||xxx|x|:x||x:|x|xx	aAAAGCTG---GGTTGAGAGGGCga	PIP5K1C
bta-miR-320a	ENSBTAT00000084499	ENSBTAG00000000710	1068	1092	-16.69	gTTTCGACAGTCGAGGTCGTCGGcg	x|||||||xxx|x|:x||x:|x|xx	aAAAGCTG---GGTTGAGAGGGCga	PIP5K1C
bta-miR-106a	ENSBTAT00000070422	ENSBTAG00000000710	362	384	-12.08	tTTTCACGTCATTTTATCTCaaa	x|||||||xx||x|:|:x||xxx	aAAAGTGCT-TACAGTGCAGgta	PIP5K1C
bta-miR-106a	ENSBTAT00000072989	ENSBTAG00000000710	362	384	-12.08	tTTTCACGTCATTTTATCTCaaa	x|||||||xx||x|:|:x||xxx	aAAAGTGCT-TACAGTGCAGgta	PIP5K1C
bta-miR-106a	ENSBTAT00000076329	ENSBTAG00000000710	362	384	-12.08	tTTTCACGTCATTTTATCTCaaa	x|||||||xx||x|:|:x||xxx	aAAAGTGCT-TACAGTGCAGgta	PIP5K1C
bta-miR-106a	ENSBTAT00000084499	ENSBTAG00000000710	362	384	-12.08	tTTTCACGTCATTTTATCTCaaa	x|||||||xx||x|:|:x||xxx	aAAAGTGCT-TACAGTGCAGgta	PIP5K1C
bta-miR-144	ENSBTAT00000070422	ENSBTAG00000000710	209	232	-14.69	gTGTCATAGTCCGCATCCATCAac	x|||||||x||x:|x|x|||x|xx	tACAGTAT-AGATG-ATGTACTag	PIP5K1C
bta-miR-144	ENSBTAT00000072989	ENSBTAG00000000710	209	232	-14.69	gTGTCATAGTCCGCATCCATCAac	x|||||||x||x:|x|x|||x|xx	tACAGTAT-AGATG-ATGTACTag	PIP5K1C
bta-miR-144	ENSBTAT00000076329	ENSBTAG00000000710	209	232	-14.69	gTGTCATAGTCCGCATCCATCAac	x|||||||x||x:|x|x|||x|xx	tACAGTAT-AGATG-ATGTACTag	PIP5K1C
bta-miR-144	ENSBTAT00000084499	ENSBTAG00000000710	209	232	-14.69	gTGTCATAGTCCGCATCCATCAac	x|||||||x||x:|x|x|||x|xx	tACAGTAT-AGATG-ATGTACTag	PIP5K1C
bta-miR-146b	ENSBTAT00000070422	ENSBTAG00000000710	2762	2783	-10.24	tCTCTTGAG--AAGTTGcattttt	x|||||||xxx|||x|:xxxxxxx	tGAGAACTGAATTCCATaggctgt	PIP5K1C
bta-miR-146b	ENSBTAT00000072989	ENSBTAG00000000710	2762	2783	-10.24	tCTCTTGAG--AAGTTGcattttt	x|||||||xxx|||x|:xxxxxxx	tGAGAACTGAATTCCATaggctgt	PIP5K1C
bta-miR-146b	ENSBTAT00000076329	ENSBTAG00000000710	2762	2783	-10.24	tCTCTTGAG--AAGTTGcattttt	x|||||||xxx|||x|:xxxxxxx	tGAGAACTGAATTCCATaggctgt	PIP5K1C
bta-miR-146b	ENSBTAT00000084499	ENSBTAG00000000710	2762	2783	-10.24	tCTCTTGAG--AAGTTGcattttt	x|||||||xxx|||x|:xxxxxxx	tGAGAACTGAATTCCATaggctgt	PIP5K1C
bta-miR-183	ENSBTAT00000070422	ENSBTAG00000000710	2236	2257	-23.8	aTACCGTG-CCGTCTgtcacggg	x|||||||x||:|||xxxxxxxx	tATGGCACTGGTAGAattcactg	PIP5K1C
bta-miR-183	ENSBTAT00000072989	ENSBTAG00000000710	2236	2257	-23.8	aTACCGTG-CCGTCTgtcacggg	x|||||||x||:|||xxxxxxxx	tATGGCACTGGTAGAattcactg	PIP5K1C
bta-miR-183	ENSBTAT00000076329	ENSBTAG00000000710	2236	2257	-23.8	aTACCGTG-CCGTCTgtcacggg	x|||||||x||:|||xxxxxxxx	tATGGCACTGGTAGAattcactg	PIP5K1C
bta-miR-183	ENSBTAT00000084499	ENSBTAG00000000710	2236	2257	-23.8	aTACCGTG-CCGTCTgtcacggg	x|||||||x||:|||xxxxxxxx	tATGGCACTGGTAGAattcactg	PIP5K1C
bta-miR-196a	ENSBTAT00000070422	ENSBTAG00000000710	196	218	-21.48	aTCCATCAACAGCCCCTCGGTct	x||||||||x||xx|xx|:::xx	tAGGTAGTT-TCATGTTGTTGgg	PIP5K1C
bta-miR-196a	ENSBTAT00000072989	ENSBTAG00000000710	196	218	-21.48	aTCCATCAACAGCCCCTCGGTct	x||||||||x||xx|xx|:::xx	tAGGTAGTT-TCATGTTGTTGgg	PIP5K1C
bta-miR-196a	ENSBTAT00000076329	ENSBTAG00000000710	196	218	-21.48	aTCCATCAACAGCCCCTCGGTct	x||||||||x||xx|xx|:::xx	tAGGTAGTT-TCATGTTGTTGgg	PIP5K1C
bta-miR-196a	ENSBTAT00000084499	ENSBTAG00000000710	196	218	-21.48	aTCCATCAACAGCCCCTCGGTct	x||||||||x||xx|xx|:::xx	tAGGTAGTT-TCATGTTGTTGgg	PIP5K1C
bta-miR-92b	ENSBTAT00000070422	ENSBTAG00000000710	2357	2378	-18.66	aTAACGTGACTCGGTCCaccac	x||||||||x:x||x||xxxxx	tATTGCACTCGTCCCGGcctcc	PIP5K1C
bta-miR-92b	ENSBTAT00000072989	ENSBTAG00000000710	2357	2378	-18.66	aTAACGTGACTCGGTCCaccac	x||||||||x:x||x||xxxxx	tATTGCACTCGTCCCGGcctcc	PIP5K1C
bta-miR-92b	ENSBTAT00000076329	ENSBTAG00000000710	2357	2378	-18.66	aTAACGTGACTCGGTCCaccac	x||||||||x:x||x||xxxxx	tATTGCACTCGTCCCGGcctcc	PIP5K1C
bta-miR-92b	ENSBTAT00000084499	ENSBTAG00000000710	2357	2378	-18.66	aTAACGTGACTCGGTCCaccac	x||||||||x:x||x||xxxxx	tATTGCACTCGTCCCGGcctcc	PIP5K1C
bta-miR-1291	ENSBTAT00000070422	ENSBTAG00000000710	1414	1439	-25.2	aCCGGGACACTCACCTCTCGGGGacc	x|||||||xx|x||x|||x|:x|xxx	tGGCCCTG--ACTGAAGACCTGCagt	PIP5K1C
bta-miR-1291	ENSBTAT00000072989	ENSBTAG00000000710	1414	1439	-25.2	aCCGGGACACTCACCTCTCGGGGacc	x|||||||xx|x||x|||x|:x|xxx	tGGCCCTG--ACTGAAGACCTGCagt	PIP5K1C
bta-miR-1291	ENSBTAT00000076329	ENSBTAG00000000710	1414	1439	-25.2	aCCGGGACACTCACCTCTCGGGGacc	x|||||||xx|x||x|||x|:x|xxx	tGGCCCTG--ACTGAAGACCTGCagt	PIP5K1C
bta-miR-1291	ENSBTAT00000084499	ENSBTAG00000000710	1414	1439	-25.2	aCCGGGACACTCACCTCTCGGGGacc	x|||||||xx|x||x|||x|:x|xxx	tGGCCCTG--ACTGAAGACCTGCagt	PIP5K1C
bta-miR-2431-3p	ENSBTAT00000070422	ENSBTAG00000000710	2554	2576	-14.02	tTGGGGGTCACTCTAATtctgtg	x|||||||x|x:x||x|xxxxxx	cACCCCCACTTGCATGAccctga	PIP5K1C
bta-miR-2431-3p	ENSBTAT00000072989	ENSBTAG00000000710	2554	2576	-14.02	tTGGGGGTCACTCTAATtctgtg	x|||||||x|x:x||x|xxxxxx	cACCCCCACTTGCATGAccctga	PIP5K1C
bta-miR-2431-3p	ENSBTAT00000076329	ENSBTAG00000000710	2554	2576	-14.02	tTGGGGGTCACTCTAATtctgtg	x|||||||x|x:x||x|xxxxxx	cACCCCCACTTGCATGAccctga	PIP5K1C
bta-miR-2431-3p	ENSBTAT00000084499	ENSBTAG00000000710	2554	2576	-14.02	tTGGGGGTCACTCTAATtctgtg	x|||||||x|x:x||x|xxxxxx	cACCCCCACTTGCATGAccctga	PIP5K1C
bta-miR-503-3p	ENSBTAT00000070422	ENSBTAG00000000710	2362	2382	-25.29	cCTCATAACGT-GACT-CGGtcc	x||||||||:xx|||xx|||xxx	gGAGTATTGTTTCTGCTGCCcgg	PIP5K1C
bta-miR-503-3p	ENSBTAT00000072989	ENSBTAG00000000710	2362	2382	-25.29	cCTCATAACGT-GACT-CGGtcc	x||||||||:xx|||xx|||xxx	gGAGTATTGTTTCTGCTGCCcgg	PIP5K1C
bta-miR-503-3p	ENSBTAT00000076329	ENSBTAG00000000710	2362	2382	-25.29	cCTCATAACGT-GACT-CGGtcc	x||||||||:xx|||xx|||xxx	gGAGTATTGTTTCTGCTGCCcgg	PIP5K1C
bta-miR-503-3p	ENSBTAT00000084499	ENSBTAG00000000710	2362	2382	-25.29	cCTCATAACGT-GACT-CGGtcc	x||||||||:xx|||xx|||xxx	gGAGTATTGTTTCTGCTGCCcgg	PIP5K1C
bta-miR-10162-5p	ENSBTAT00000070422	ENSBTAG00000000710	2469	2491	-21.62	cCCTGTCCGCTACGTTGACttaa	x||||||||x|x||x:|||xxxx	tGGACAGGCCAAGCCGCTGtgca	PIP5K1C
bta-miR-10162-5p	ENSBTAT00000072989	ENSBTAG00000000710	2469	2491	-21.62	cCCTGTCCGCTACGTTGACttaa	x||||||||x|x||x:|||xxxx	tGGACAGGCCAAGCCGCTGtgca	PIP5K1C
bta-miR-10162-5p	ENSBTAT00000076329	ENSBTAG00000000710	2469	2491	-21.62	cCCTGTCCGCTACGTTGACttaa	x||||||||x|x||x:|||xxxx	tGGACAGGCCAAGCCGCTGtgca	PIP5K1C
bta-miR-10162-5p	ENSBTAT00000084499	ENSBTAG00000000710	2469	2491	-21.62	cCCTGTCCGCTACGTTGACttaa	x||||||||x|x||x:|||xxxx	tGGACAGGCCAAGCCGCTGtgca	PIP5K1C
bta-miR-11991	ENSBTAT00000070422	ENSBTAG00000000710	2427	2447	-12.66	aACAAGACcccacccctggct	x|||||||xxxxxxxxxxxxx	aTGTTCTGtatcttgattgta	PIP5K1C
bta-miR-11991	ENSBTAT00000072989	ENSBTAG00000000710	2427	2447	-12.66	aACAAGACcccacccctggct	x|||||||xxxxxxxxxxxxx	aTGTTCTGtatcttgattgta	PIP5K1C
bta-miR-11991	ENSBTAT00000076329	ENSBTAG00000000710	2427	2447	-12.66	aACAAGACcccacccctggct	x|||||||xxxxxxxxxxxxx	aTGTTCTGtatcttgattgta	PIP5K1C
bta-miR-11991	ENSBTAT00000084499	ENSBTAG00000000710	2427	2447	-12.66	aACAAGACcccacccctggct	x|||||||xxxxxxxxxxxxx	aTGTTCTGtatcttgattgta	PIP5K1C
bta-miR-671	ENSBTAT00000070564	ENSBTAG00000000711	1712	1736	-30.14	tCCTTCGGGGTCCATTCCTttctgg	x||||||||::|xx|:||:xxxxxx	aGGAAGCCCTGG--AGGGGctggag	NDRG1
bta-miR-2370-5p	ENSBTAT00000070564	ENSBTAG00000000711	1661	1684	-13.17	cCCCTTTTCTGTGTTCGGTGAcgt	x|||||||xx::x|||:::x|xxx	tGGGAAAA--TGAAAGTTGGTtat	NDRG1
bta-miR-2431-3p	ENSBTAT00000000950	ENSBTAG00000000711	1103	1127	-24.1	gTGGGGGTGTAACAGTttctaacct	x||||||||x|||x||xxxxxxxxx	cACCCCCAC-TTG-CAtgaccctga	NDRG1
bta-miR-2431-3p	ENSBTAT00000070564	ENSBTAG00000000711	1103	1127	-24.1	gTGGGGGTGTAACAGTttctaacct	x||||||||x|||x||xxxxxxxxx	cACCCCCAC-TTG-CAtgaccctga	NDRG1
bta-miR-2431-3p	ENSBTAT00000080522	ENSBTAG00000000711	1103	1127	-24.1	gTGGGGGTGTAACAGTttctaacct	x||||||||x|||x||xxxxxxxxx	cACCCCCAC-TTG-CAtgaccctga	NDRG1
bta-miR-6535	ENSBTAT00000000950	ENSBTAG00000000711	788	810	-25.01	cTCCCCCTCCGTCCGTCGACTaa	x||||||||x|:|x::|xx||xx	tAGGGGGAG-CGGTTGGAGGAct	NDRG1
bta-miR-6535	ENSBTAT00000070564	ENSBTAG00000000711	788	810	-25.01	cTCCCCCTCCGTCCGTCGACTaa	x||||||||x|:|x::|xx||xx	tAGGGGGAG-CGGTTGGAGGAct	NDRG1
bta-miR-6535	ENSBTAT00000080522	ENSBTAG00000000711	788	810	-25.01	cTCCCCCTCCGTCCGTCGACTaa	x||||||||x|:|x::|xx||xx	tAGGGGGAG-CGGTTGGAGGAct	NDRG1
bta-miR-342	ENSBTAT00000000956	ENSBTAG00000000712	227	250	-19.3	aGAGTGTGACTG-GGTGTttgattc	x|||||||x||xx:|:||xxxxxxx	tCTCACACAGAAATCGCAcccatct	FBXW2
bta-miR-342	ENSBTAT00000085937	ENSBTAG00000000712	227	250	-19.3	aGAGTGTGACTG-GGTGTttgattc	x|||||||x||xx:|:||xxxxxxx	tCTCACACAGAAATCGCAcccatct	FBXW2
bta-miR-146b	ENSBTAT00000000956	ENSBTAG00000000712	76	99	-15.18	aCTCTTGAAACCAAGTAcgtcagc	x|||||||xxxx|x|||xxxxxxx	tGAGAACTGAATTCCATaggctgt	FBXW2
bta-miR-146b	ENSBTAT00000085937	ENSBTAG00000000712	76	99	-15.18	aCTCTTGAAACCAAGTAcgtcagc	x|||||||xxxx|x|||xxxxxxx	tGAGAACTGAATTCCATaggctgt	FBXW2
bta-miR-106a	ENSBTAT00000000957	ENSBTAG00000000713	668	688	-18.89	aTTTCACGAACTG-C-CGTCaac	x|||||||||x||x|x||||xxx	aAAAGTGCTT-ACAGTGCAGgta	AGFG2
bta-miR-106a	ENSBTAT00000085405	ENSBTAG00000000713	668	688	-18.89	aTTTCACGAACTG-C-CGTCaac	x|||||||||x||x|x||||xxx	aAAAGTGCTT-ACAGTGCAGgta	AGFG2
bta-miR-200a	ENSBTAT00000000957	ENSBTAG00000000713	701	723	-12.25	tTTGTGACCATAGGTTTG-TACtg	x|||||||x|x|xxx|||x|||xx	tAACACTG-TCTGGTAACGATGtt	AGFG2
bta-miR-200a	ENSBTAT00000085405	ENSBTAG00000000713	701	723	-12.25	tTTGTGACCATAGGTTTG-TACtg	x|||||||x|x|xxx|||x|||xx	tAACACTG-TCTGGTAACGATGtt	AGFG2
bta-miR-769	ENSBTAT00000000957	ENSBTAG00000000713	188	210	-25.21	cCTCTGGACCCCCGCCGACTgga	x|||||||xx|||:xx||||xxx	tGAGACCTCCGGGTT-CTGAgct	AGFG2
bta-miR-769	ENSBTAT00000085405	ENSBTAG00000000713	188	210	-25.21	cCTCTGGACCCCCGCCGACTgga	x|||||||xx|||:xx||||xxx	tGAGACCTCCGGGTT-CTGAgct	AGFG2
bta-miR-92b	ENSBTAT00000000957	ENSBTAG00000000713	942	963	-14.86	tTAACGTGTTTCGGaaaaggac	x|||||||xx:x||xxxxxxxx	tATTGCACTCGTCCcggcctcc	AGFG2
bta-miR-92b	ENSBTAT00000085405	ENSBTAG00000000713	942	963	-14.86	tTAACGTGTTTCGGaaaaggac	x|||||||xx:x||xxxxxxxx	tATTGCACTCGTCCcggcctcc	AGFG2
bta-miR-1291	ENSBTAT00000000957	ENSBTAG00000000713	905	932	-19.93	tCCGGGACCCCACTAGCCCTGTACaccg	x|||||||xxx|||xxxx|||x||xxxx	tGGCCCTGAC-TGAA---GACCTGcagt	AGFG2
bta-miR-1291	ENSBTAT00000085405	ENSBTAG00000000713	905	932	-19.93	tCCGGGACCCCACTAGCCCTGTACaccg	x|||||||xxx|||xxxx|||x||xxxx	tGGCCCTGAC-TGAA---GACCTGcagt	AGFG2
bta-miR-2370-5p	ENSBTAT00000000957	ENSBTAG00000000713	974	995	-11.79	cCCCTTTTTTTTTCcttttttt	x|||||||x:||||xxxxxxxx	tGGGAAAATGAAAGttggttat	AGFG2
bta-miR-2370-5p	ENSBTAT00000085405	ENSBTAG00000000713	974	995	-11.79	cCCCTTTTTTTTTCcttttttt	x|||||||x:||||xxxxxxxx	tGGGAAAATGAAAGttggttat	AGFG2
bta-miR-148a	ENSBTAT00000000955	ENSBTAG00000000717	135	153	-16.3	gGTCACGTG---TCTTccacct	x||||||||xxx||||xxxxxx	tCAGTGCACTACAGAActttgt	PLPP2
bta-miR-181b	ENSBTAT00000000955	ENSBTAG00000000717	309	331	-13.62	tTGTAAGTAGTT-CGTTTACggga	x||||||||::xx|:x::||xxxx	aACATTCATTGCTGTCGGTGggtt	PLPP2
bta-miR-181c	ENSBTAT00000000955	ENSBTAG00000000717	308	331	-13.53	tTGTAAGTAGTTCGTTTACgggat	x|||||||x|xx|:x::||xxxxx	aACATTCAACCTGTCGGTGagttt	PLPP2
bta-miR-152	ENSBTAT00000000955	ENSBTAG00000000717	135	153	-21.6	gGTCACGT---GTCTTCCACct	x|||||||xxx|||||xx||xx	tCAGTGCATGACAGAACTTGgg	PLPP2
bta-miR-342	ENSBTAT00000082422	ENSBTAG00000000736	106	129	-20.88	tGAGTGTGTGTGT-GTGTATGTAtg	x||||||||x|x|x|:||xx|||xx	tCTCACACAGAAATCGCACCCATct	LRP8
bta-miR-146b	ENSBTAT00000082422	ENSBTAG00000000736	955	980	-15.07	gCTCTTGAAACGCATGACATTCttca	x|||||||xx|xx|x|xx||:|xxxx	tGAGAACT--GAATTCCATAGGctgt	LRP8
bta-miR-183	ENSBTAT00000082422	ENSBTAG00000000736	1093	1115	-16.57	cTACCGTGGGAGTCATACGaagt	x|||||||:xx:||x||x|xxxx	tATGGCACTGGTAGAATTCactg	LRP8
bta-miR-6119-5p	ENSBTAT00000082422	ENSBTAG00000000736	1173	1195	-14.82	tCTCCATTCACGGACTcggtcag	x|||||||xxxx:|||xxxxxxx	aGAGGTAAAAAATTGAtttgact	LRP8
bta-miR-6119-3p	ENSBTAT00000082422	ENSBTAG00000000736	787	808	-14.69	tGTTTAGTGCTAT-TGAGAaaag	x|||||||:xx|xx|||||xxxx	gCAAATCATTTTTTACTCTccaa	LRP8
bta-miR-30e-5p	ENSBTAT00000035892	ENSBTAG00000000737	77	98	-16.5	cCATTTGTTG--ACGAACCTTTcg	x|||||||x|xx||xx|||||:xx	tGTAAACATCCTTGACTGGAAGct	DMXL2
bta-miR-30e-5p	ENSBTAT00000072654	ENSBTAG00000000737	77	98	-16.5	cCATTTGTTG--ACGAACCTTTcg	x|||||||x|xx||xx|||||:xx	tGTAAACATCCTTGACTGGAAGct	DMXL2
bta-miR-30e-5p	ENSBTAT00000086262	ENSBTAG00000000737	77	98	-16.5	cCATTTGTTG--ACGAACCTTTcg	x|||||||x|xx||xx|||||:xx	tGTAAACATCCTTGACTGGAAGct	DMXL2
bta-miR-30a-5p	ENSBTAT00000035892	ENSBTAG00000000737	77	98	-15.15	cCATTTGTTG-A-CGAACCTTTcg	x|||||||x|x|x|xx|||||:xx	tGTAAACATCCTCGACTGGAAGct	DMXL2
bta-miR-30a-5p	ENSBTAT00000072654	ENSBTAG00000000737	77	98	-15.15	cCATTTGTTG-A-CGAACCTTTcg	x|||||||x|x|x|xx|||||:xx	tGTAAACATCCTCGACTGGAAGct	DMXL2
bta-miR-30a-5p	ENSBTAT00000086262	ENSBTAG00000000737	77	98	-15.15	cCATTTGTTG-A-CGAACCTTTcg	x|||||||x|x|x|xx|||||:xx	tGTAAACATCCTCGACTGGAAGct	DMXL2
bta-miR-30f	ENSBTAT00000035892	ENSBTAG00000000737	75	98	-10.2	cCATTTGTTGacgaacctttcgtc	x|||||||x|xxxxxxxxxxxxxx	tGTAAACACCctacactctcagct	DMXL2
bta-miR-30f	ENSBTAT00000072654	ENSBTAG00000000737	75	98	-10.2	cCATTTGTTGacgaacctttcgtc	x|||||||x|xxxxxxxxxxxxxx	tGTAAACACCctacactctcagct	DMXL2
bta-miR-30f	ENSBTAT00000086262	ENSBTAG00000000737	75	98	-10.2	cCATTTGTTGacgaacctttcgtc	x|||||||x|xxxxxxxxxxxxxx	tGTAAACACCctacactctcagct	DMXL2
bta-miR-193a-5p	ENSBTAT00000000982	ENSBTAG00000000738	389	410	-13.07	cCCCAGAAGacttaagagtgtg	x|||||||:xxxxxxxxxxxxx	tGGGTCTTTgcgggcgagatga	DAPK1
bta-miR-193a-5p	ENSBTAT00000067688	ENSBTAG00000000738	881	902	-13.07	cCCCAGAAGacttaagagtgtg	x|||||||:xxxxxxxxxxxxx	tGGGTCTTTgcgggcgagatga	DAPK1
bta-miR-193a-5p	ENSBTAT00000072827	ENSBTAG00000000738	881	902	-13.07	cCCCAGAAGacttaagagtgtg	x|||||||:xxxxxxxxxxxxx	tGGGTCTTTgcgggcgagatga	DAPK1
bta-miR-193a-5p	ENSBTAT00000074042	ENSBTAG00000000738	389	410	-13.07	cCCCAGAAGacttaagagtgtg	x|||||||:xxxxxxxxxxxxx	tGGGTCTTTgcgggcgagatga	DAPK1
bta-let-7d	ENSBTAT00000067688	ENSBTAG00000000738	140	163	-17.86	cCTCCATCACCGTCTCTTTATCca	x||||||||x|xx|xx:x||||xx	aGAGGTAGTAG--GTTGCATAGtt	DAPK1
bta-let-7d	ENSBTAT00000072827	ENSBTAG00000000738	140	163	-17.86	cCTCCATCACCGTCTCTTTATCca	x||||||||x|xx|xx:x||||xx	aGAGGTAGTAG--GTTGCATAGtt	DAPK1
bta-miR-200a	ENSBTAT00000000982	ENSBTAG00000000738	228	250	-14.59	gTTGTGACCGGTACTTtaacgag	x|||||||x|::xx||xxxxxxx	tAACACTGTCTGGTAAcgatgtt	DAPK1
bta-miR-200a	ENSBTAT00000067688	ENSBTAG00000000738	720	742	-14.59	gTTGTGACCGGTACTTtaacgag	x|||||||x|::xx||xxxxxxx	tAACACTGTCTGGTAAcgatgtt	DAPK1
bta-miR-200a	ENSBTAT00000072827	ENSBTAG00000000738	720	742	-14.59	gTTGTGACCGGTACTTtaacgag	x|||||||x|::xx||xxxxxxx	tAACACTGTCTGGTAAcgatgtt	DAPK1
bta-miR-200a	ENSBTAT00000074042	ENSBTAG00000000738	228	250	-14.59	gTTGTGACCGGTACTTtaacgag	x|||||||x|::xx||xxxxxxx	tAACACTGTCTGGTAAcgatgtt	DAPK1
bta-let-7g	ENSBTAT00000067688	ENSBTAG00000000738	142	163	-12.71	cCTCCATCACCGtctctttatc	x||||||||x|:xxxxxxxxxx	tGAGGTAGTAGTttgtacagtt	DAPK1
bta-let-7g	ENSBTAT00000072827	ENSBTAG00000000738	142	163	-12.71	cCTCCATCACCGtctctttatc	x||||||||x|:xxxxxxxxxx	tGAGGTAGTAGTttgtacagtt	DAPK1
bta-let-7a-5p	ENSBTAT00000067688	ENSBTAG00000000738	140	163	-18.31	cCTCCATCACCGTCTCTTTATCca	x||||||||x|xx|xx:x||||xx	tGAGGTAGTAG--GTTGTATAGtt	DAPK1
bta-let-7a-5p	ENSBTAT00000072827	ENSBTAG00000000738	140	163	-18.31	cCTCCATCACCGTCTCTTTATCca	x||||||||x|xx|xx:x||||xx	tGAGGTAGTAG--GTTGTATAGtt	DAPK1
bta-miR-342	ENSBTAT00000000982	ENSBTAG00000000738	370	396	-24.84	aGAGTGTGTCCAGAACCGAGGGATAct	x|||||||||xxx|x|x|x|||x||xx	tCTCACACAGAAATCG-CACCC-ATct	DAPK1
bta-miR-342	ENSBTAT00000067688	ENSBTAG00000000738	862	888	-24.84	aGAGTGTGTCCAGAACCGAGGGATAct	x|||||||||xxx|x|x|x|||x||xx	tCTCACACAGAAATCG-CACCC-ATct	DAPK1
bta-miR-342	ENSBTAT00000072827	ENSBTAG00000000738	862	888	-24.84	aGAGTGTGTCCAGAACCGAGGGATAct	x|||||||||xxx|x|x|x|||x||xx	tCTCACACAGAAATCG-CACCC-ATct	DAPK1
bta-miR-342	ENSBTAT00000074042	ENSBTAG00000000738	370	396	-24.84	aGAGTGTGTCCAGAACCGAGGGATAct	x|||||||||xxx|x|x|x|||x||xx	tCTCACACAGAAATCG-CACCC-ATct	DAPK1
bta-let-7b	ENSBTAT00000067688	ENSBTAG00000000738	143	163	-16.11	cCTCCATCA-CCGTCTCtttat	x||||||||x||:x|x|xxxxx	tGAGGTAGTAGGTTGTGtggtt	DAPK1
bta-let-7b	ENSBTAT00000072827	ENSBTAG00000000738	143	163	-16.11	cCTCCATCA-CCGTCTCtttat	x||||||||x||:x|x|xxxxx	tGAGGTAGTAGGTTGTGtggtt	DAPK1
bta-let-7e	ENSBTAT00000067688	ENSBTAG00000000738	141	163	-16.62	cCTCCATCACCGTCTCTTTATcc	x|||||||xx|x:|xx:x|||xx	tGAGGTAG--GAGGTTGTATAgt	DAPK1
bta-let-7e	ENSBTAT00000072827	ENSBTAG00000000738	141	163	-16.62	cCTCCATCACCGTCTCTTTATcc	x|||||||xx|x:|xx:x|||xx	tGAGGTAG--GAGGTTGTATAgt	DAPK1
bta-miR-196a	ENSBTAT00000067688	ENSBTAG00000000738	141	162	-13.3	cTCCATCACCGTctctttatcc	x|||||||xx||xxxxxxxxxx	tAGGTAGTTTCAtgttgttggg	DAPK1
bta-miR-196a	ENSBTAT00000072827	ENSBTAG00000000738	141	162	-13.3	cTCCATCACCGTctctttatcc	x|||||||xx||xxxxxxxxxx	tAGGTAGTTTCAtgttgttggg	DAPK1
bta-miR-1296	ENSBTAT00000067688	ENSBTAG00000000738	207	226	-19.33	tATCCCGG-AC-GAGaacttga	x|||||||x||x|||xxxxxxx	tTAGGGCCCTGGCTCcatctcc	DAPK1
bta-miR-1296	ENSBTAT00000072827	ENSBTAG00000000738	207	226	-19.33	tATCCCGG-AC-GAGaacttga	x|||||||x||x|||xxxxxxx	tTAGGGCCCTGGCTCcatctcc	DAPK1
bta-miR-2332	ENSBTAT00000067688	ENSBTAG00000000738	214	237	-11.82	tCCAAATTTCCTATCCcggacgag	x|||||||:|xx|x||xxxxxxxx	cGGTTTAAGGTCTTGGagacaaag	DAPK1
bta-miR-2332	ENSBTAT00000072827	ENSBTAG00000000738	214	237	-11.82	tCCAAATTTCCTATCCcggacgag	x|||||||:|xx|x||xxxxxxxx	cGGTTTAAGGTCTTGGagacaaag	DAPK1
bta-miR-2285bf	ENSBTAT00000000982	ENSBTAG00000000738	255	275	-18.16	gTTTGTGCTTGTACAGAAcgt	x|||||||||||xxx:||xxx	aAAACACGAACAAACTTTttg	DAPK1
bta-miR-2285bf	ENSBTAT00000067688	ENSBTAG00000000738	747	767	-18.16	gTTTGTGCTTGTACAGAAcgt	x|||||||||||xxx:||xxx	aAAACACGAACAAACTTTttg	DAPK1
bta-miR-2285bf	ENSBTAT00000072827	ENSBTAG00000000738	747	767	-18.16	gTTTGTGCTTGTACAGAAcgt	x|||||||||||xxx:||xxx	aAAACACGAACAAACTTTttg	DAPK1
bta-miR-2285bf	ENSBTAT00000074042	ENSBTAG00000000738	255	275	-18.16	gTTTGTGCTTGTACAGAAcgt	x|||||||||||xxx:||xxx	aAAACACGAACAAACTTTttg	DAPK1
bta-miR-181b	ENSBTAT00000074081	ENSBTAG00000000742	1042	1065	-10.98	gTGTAAGTTACCGTAGaagaattt	x|||||||x||x::||xxxxxxxx	aACATTCATTGCTGTCggtgggtt	AMOTL2
bta-miR-193a-5p	ENSBTAT00000000988	ENSBTAG00000000742	101	122	-24.85	tCCCAGAAGAACCCCCTgccca	x|||||||:xx|||x||xxxxx	tGGGTCTTTGCGGGCGAgatga	AMOTL2
bta-miR-193a-5p	ENSBTAT00000074081	ENSBTAG00000000742	1598	1619	-24.85	tCCCAGAAGAACCCCCTgccca	x|||||||:xx|||x||xxxxx	tGGGTCTTTGCGGGCGAgatga	AMOTL2
bta-miR-193a-5p	ENSBTAT00000077451	ENSBTAG00000000742	101	122	-24.85	tCCCAGAAGAACCCCCTgccca	x|||||||:xx|||x||xxxxx	tGGGTCTTTGCGGGCGAgatga	AMOTL2
bta-miR-30e-5p	ENSBTAT00000000988	ENSBTAG00000000742	1348	1374	-13	aCATTTGTTACGTGTACTTGGTTTacg	x|||||||x|x|x|x|||x:x:||xxx	tGTAAACA-T-C-CTTGACTGGAAgct	AMOTL2
bta-miR-30e-5p	ENSBTAT00000074081	ENSBTAG00000000742	2845	2871	-13	aCATTTGTTACGTGTACTTGGTTTacg	x|||||||x|x|x|x|||x:x:||xxx	tGTAAACA-T-C-CTTGACTGGAAgct	AMOTL2
bta-miR-30e-5p	ENSBTAT00000077451	ENSBTAG00000000742	1348	1374	-13	aCATTTGTTACGTGTACTTGGTTTacg	x|||||||x|x|x|x|||x:x:||xxx	tGTAAACA-T-C-CTTGACTGGAAgct	AMOTL2
bta-let-7d	ENSBTAT00000074081	ENSBTAG00000000742	772	790	-17.33	aCTCCATC---CAGGGTGTaag	x|||||||xxx||:x||:|xxx	aGAGGTAGTAGGTTGCATAgtt	AMOTL2
bta-let-7g	ENSBTAT00000074081	ENSBTAG00000000742	772	790	-17.11	aCTCCATC--CAGG-GTGTaag	x|||||||xx||::x:|||xxx	tGAGGTAGTAGTTTGTACAgtt	AMOTL2
bta-miR-30a-5p	ENSBTAT00000000988	ENSBTAG00000000742	1347	1374	-12.51	aCATTTGTTACGTGTACTTGGTTTACgt	x|||||||x|x|x|:xxx||:::|x|xx	tGTAAACA-TCCTCG---ACTGGAAGct	AMOTL2
bta-miR-30a-5p	ENSBTAT00000074081	ENSBTAG00000000742	2844	2871	-12.51	aCATTTGTTACGTGTACTTGGTTTACgt	x|||||||x|x|x|:xxx||:::|x|xx	tGTAAACA-TCCTCG---ACTGGAAGct	AMOTL2
bta-miR-30a-5p	ENSBTAT00000077451	ENSBTAG00000000742	1347	1374	-12.51	aCATTTGTTACGTGTACTTGGTTTACgt	x|||||||x|x|x|:xxx||:::|x|xx	tGTAAACA-TCCTCG---ACTGGAAGct	AMOTL2
bta-let-7a-5p	ENSBTAT00000074081	ENSBTAG00000000742	772	790	-18.49	aCTCCATC---CAGGGTGTaag	x|||||||xxx||:x:|:|xxx	tGAGGTAGTAGGTTGTATAgtt	AMOTL2
bta-miR-342	ENSBTAT00000000988	ENSBTAG00000000742	407	433	-17.72	tGAGTGTGCGAGTTGTCCGGCGGTtct	x|||||||xxxx|x|xx||xx|||xxx	tCTCACACAGAAATC--GCACCCAtct	AMOTL2
bta-miR-342	ENSBTAT00000074081	ENSBTAG00000000742	1904	1930	-17.72	tGAGTGTGCGAGTTGTCCGGCGGTtct	x|||||||xxxx|x|xx||xx|||xxx	tCTCACACAGAAATC--GCACCCAtct	AMOTL2
bta-miR-342	ENSBTAT00000077451	ENSBTAG00000000742	407	433	-17.72	tGAGTGTGCGAGTTGTCCGGCGGTtct	x|||||||xxxx|x|xx||xx|||xxx	tCTCACACAGAAATC--GCACCCAtct	AMOTL2
bta-let-7b	ENSBTAT00000074081	ENSBTAG00000000742	765	790	-17.08	aCTCCATCCAGGGTGTAAGACGagtg	x|||||||xxxx:|x:||x||:xxxx	tGAGGTAG----TAGGTTGTGTggtt	AMOTL2
bta-let-7e	ENSBTAT00000074081	ENSBTAG00000000742	770	790	-18.49	aCTCCATCCagggtgtaagac	x||||||||xxxxxxxxxxxx	tGAGGTAGGaggttgtatagt	AMOTL2
bta-miR-497	ENSBTAT00000000988	ENSBTAG00000000742	1586	1606	-19.36	gTCGTCGTTAGG-ACCAtgtcc	x|||||||xx|:x||||xxxxx	cAGCAGCACACTGTGGTttgta	AMOTL2
bta-miR-497	ENSBTAT00000074081	ENSBTAG00000000742	3083	3103	-19.36	gTCGTCGTTAGG-ACCAtgtcc	x|||||||xx|:x||||xxxxx	cAGCAGCACACTGTGGTttgta	AMOTL2
bta-miR-497	ENSBTAT00000077451	ENSBTAG00000000742	1586	1606	-19.36	gTCGTCGTTAGG-ACCAtgtcc	x|||||||xx|:x||||xxxxx	cAGCAGCACACTGTGGTttgta	AMOTL2
bta-miR-146b	ENSBTAT00000000988	ENSBTAG00000000742	1164	1189	-17.32	cCTCTTGATTTTTGTCGGCTCTGttt	x|||||||:||xx|xx|xx||:|xxx	tGAGAACTGAATTC--CATAGGCtgt	AMOTL2
bta-miR-146b	ENSBTAT00000074081	ENSBTAG00000000742	2661	2686	-17.32	cCTCTTGATTTTTGTCGGCTCTGttt	x|||||||:||xx|xx|xx||:|xxx	tGAGAACTGAATTC--CATAGGCtgt	AMOTL2
bta-miR-146b	ENSBTAT00000077451	ENSBTAG00000000742	1164	1189	-17.32	cCTCTTGATTTTTGTCGGCTCTGttt	x|||||||:||xx|xx|xx||:|xxx	tGAGAACTGAATTC--CATAGGCtgt	AMOTL2
bta-miR-30f	ENSBTAT00000000988	ENSBTAG00000000742	1351	1374	-13.36	aCATTTGTTACGTGTacttggttt	x|||||||xxx:|||xxxxxxxxx	tGTAAACACCCTACActctcagct	AMOTL2
bta-miR-30f	ENSBTAT00000074081	ENSBTAG00000000742	2848	2871	-13.36	aCATTTGTTACGTGTacttggttt	x|||||||xxx:|||xxxxxxxxx	tGTAAACACCCTACActctcagct	AMOTL2
bta-miR-30f	ENSBTAT00000077451	ENSBTAG00000000742	1351	1374	-13.36	aCATTTGTTACGTGTacttggttt	x|||||||xxx:|||xxxxxxxxx	tGTAAACACCCTACActctcagct	AMOTL2
bta-miR-671	ENSBTAT00000000988	ENSBTAG00000000742	801	826	-25.02	cCCTTCGGGTGGTACGTCTAGACacc	x||||||||xx::x|x:|:x|||xxx	aGGAAGCCC--TG-GAGGGGCTGgag	AMOTL2
bta-miR-671	ENSBTAT00000074081	ENSBTAG00000000742	2298	2323	-25.02	cCCTTCGGGTGGTACGTCTAGACacc	x||||||||xx::x|x:|:x|||xxx	aGGAAGCCC--TG-GAGGGGCTGgag	AMOTL2
bta-miR-671	ENSBTAT00000077451	ENSBTAG00000000742	801	826	-25.02	cCCTTCGGGTGGTACGTCTAGACacc	x||||||||xx::x|x:|:x|||xxx	aGGAAGCCC--TG-GAGGGGCTGgag	AMOTL2
bta-miR-1291	ENSBTAT00000000988	ENSBTAG00000000742	1022	1046	-23.92	aCCGGGACAAAGTCCCACGACGcgt	x|||||||xx|x|x|xxx||||xxx	tGGCCCTGACTGAAGAC-CTGCagt	AMOTL2
bta-miR-1291	ENSBTAT00000074081	ENSBTAG00000000742	492	516	-24.57	cCCGGGACAGACGATCCTTCCGTcc	x|||||||x|||xx||xxxx|||xx	tGGCCCTGACTGA-AGACCTGCAgt	AMOTL2
bta-miR-1291	ENSBTAT00000077451	ENSBTAG00000000742	1022	1046	-23.92	aCCGGGACAAAGTCCCACGACGcgt	x|||||||xx|x|x|xxx||||xxx	tGGCCCTGACTGAAGAC-CTGCagt	AMOTL2
bta-miR-2370-5p	ENSBTAT00000000988	ENSBTAG00000000742	651	671	-14.26	cCCCTTTTTCGT-CGGTCAtag	x|||||||x|x|x|:::||xxx	tGGGAAAATGAAAGTTGGTtat	AMOTL2
bta-miR-2370-5p	ENSBTAT00000074081	ENSBTAG00000000742	2148	2168	-14.26	cCCCTTTTTCGT-CGGTCAtag	x|||||||x|x|x|:::||xxx	tGGGAAAATGAAAGTTGGTtat	AMOTL2
bta-miR-2370-5p	ENSBTAT00000077451	ENSBTAG00000000742	651	671	-14.26	cCCCTTTTTCGT-CGGTCAtag	x|||||||x|x|x|:::||xxx	tGGGAAAATGAAAGTTGGTtat	AMOTL2
bta-miR-574	ENSBTAT00000074081	ENSBTAG00000000742	720	742	-18.53	cCTCACACCCGT-TACTCAgccct	x|||||||x|::x:|||||xxxxx	tGAGTGTGTGTGTGTGAGTgtgtg	AMOTL2
bta-miR-6119-3p	ENSBTAT00000000988	ENSBTAG00000000742	252	274	-18.98	gGTTTAGTTGTGTAGGGGAGGga	x|||||||x:x:x|x|:||||xx	gCAAATCATTTTTTACTCTCCaa	AMOTL2
bta-miR-6119-3p	ENSBTAT00000074081	ENSBTAG00000000742	1749	1771	-18.98	gGTTTAGTTGTGTAGGGGAGGga	x|||||||x:x:x|x|:||||xx	gCAAATCATTTTTTACTCTCCaa	AMOTL2
bta-miR-6119-3p	ENSBTAT00000077451	ENSBTAG00000000742	252	274	-18.98	gGTTTAGTTGTGTAGGGGAGGga	x|||||||x:x:x|x|:||||xx	gCAAATCATTTTTTACTCTCCaa	AMOTL2
bta-miR-6535	ENSBTAT00000000988	ENSBTAG00000000742	872	893	-26.92	gTCCCCCTTGTTtctgagacta	x|||||||:|::xxxxxxxxxx	tAGGGGGAGCGGttggaggact	AMOTL2
bta-miR-6535	ENSBTAT00000074081	ENSBTAG00000000742	2369	2390	-26.92	gTCCCCCTTGTTtctgagacta	x|||||||:|::xxxxxxxxxx	tAGGGGGAGCGGttggaggact	AMOTL2
bta-miR-6535	ENSBTAT00000077451	ENSBTAG00000000742	872	893	-26.92	gTCCCCCTTGTTtctgagacta	x|||||||:|::xxxxxxxxxx	tAGGGGGAGCGGttggaggact	AMOTL2
bta-miR-10162-5p	ENSBTAT00000000988	ENSBTAG00000000742	732	748	-20	cCCTGTCC--T----CGACACct	x|||||||xx|xxxx||||||xx	tGGACAGGCCAAGCCGCTGTGca	AMOTL2
bta-miR-10162-5p	ENSBTAT00000074081	ENSBTAG00000000742	2229	2245	-20	cCCTGTCC--T----CGACACct	x|||||||xx|xxxx||||||xx	tGGACAGGCCAAGCCGCTGTGca	AMOTL2
bta-miR-10162-5p	ENSBTAT00000077451	ENSBTAG00000000742	732	748	-20	cCCTGTCC--T----CGACACct	x|||||||xx|xxxx||||||xx	tGGACAGGCCAAGCCGCTGTGca	AMOTL2
bta-miR-106a	ENSBTAT00000075969	ENSBTAG00000000746	94	116	-15.67	tTTTCACGATTAACAATGTTata	x||||||||x|xx||x:||:xxx	aAAAGTGCTTACAGT-GCAGgta	KAT2B
bta-miR-106a	ENSBTAT00000085098	ENSBTAG00000000746	94	116	-15.67	tTTTCACGATTAACAATGTTata	x||||||||x|xx||x:||:xxx	aAAAGTGCTTACAGT-GCAGgta	KAT2B
bta-miR-181b	ENSBTAT00000075969	ENSBTAG00000000746	337	361	-14.16	tTGTAAGTGCCAGACTTTTAaaaga	x|||||||:x|x|||xx::|xxxxx	aACATTCATTG-CTGTCGGTgggtt	KAT2B
bta-miR-181b	ENSBTAT00000085098	ENSBTAG00000000746	337	361	-14.16	tTGTAAGTGCCAGACTTTTAaaaga	x|||||||:x|x|||xx::|xxxxx	aACATTCATTG-CTGTCGGTgggtt	KAT2B
bta-miR-181c	ENSBTAT00000075969	ENSBTAG00000000746	340	361	-13.97	tTGTAAGT--GCCAGACTTTTAaa	x|||||||xx|x|||x|x:|:|xx	aACATTCAACCTGTCGGTGAGTtt	KAT2B
bta-miR-181c	ENSBTAT00000085098	ENSBTAG00000000746	340	361	-13.97	tTGTAAGT--GCCAGACTTTTAaa	x|||||||xx|x|||x|x:|:|xx	aACATTCAACCTGTCGGTGAGTtt	KAT2B
bta-miR-144	ENSBTAT00000075969	ENSBTAG00000000746	696	721	-15.27	aTGTCATAATGTCTGAGCACATctct	x|||||||xxx|||x|xx||||xxxx	tACAGTAT---AGA-TGATGTActag	KAT2B
bta-miR-144	ENSBTAT00000085098	ENSBTAG00000000746	696	721	-15.27	aTGTCATAATGTCTGAGCACATctct	x|||||||xxx|||x|xx||||xxxx	tACAGTAT---AGA-TGATGTActag	KAT2B
bta-miR-6535	ENSBTAT00000075969	ENSBTAG00000000746	882	903	-16.91	tTCCCCCTTTTTAGaaataaac	x|||||||:x::|:xxxxxxxx	tAGGGGGAGCGGTTggaggact	KAT2B
bta-miR-6535	ENSBTAT00000085098	ENSBTAG00000000746	882	903	-16.91	tTCCCCCTTTTTAGaaataaac	x|||||||:x::|:xxxxxxxx	tAGGGGGAGCGGTTggaggact	KAT2B
bta-miR-200a	ENSBTAT00000000999	ENSBTAG00000000752	430	449	-12.45	tTTGTGACA---TGTTTCTcaaa	x||||||||xxx::||x||xxxx	tAACACTGTCTGGTAACGAtgtt	SGO1
bta-miR-182	ENSBTAT00000000999	ENSBTAG00000000752	256	280	-16.18	aAACCGTTATATTTTTTTAGatttg	x||||||||:x:x|:||x||xxxxx	tTTGGCAATG-GTAGAACTCacact	SGO1
bta-miR-2370-5p	ENSBTAT00000000999	ENSBTAG00000000752	354	373	-13.24	tCCCTTTT--TTTCTACGGAat	x|||||||xx||||x||x:|xx	tGGGAAAATGAAAGTTGGTTat	SGO1
bta-miR-2285bf	ENSBTAT00000000999	ENSBTAG00000000752	1136	1157	-13.88	aTTTGTGCTTAGTTTTAAAtat	x|||||||||x||||x|||xxx	aAAACACGAA-CAAACTTTttg	SGO1
bta-let-7d	ENSBTAT00000001000	ENSBTAG00000000753	778	799	-18.35	gCTCCATCGACCGATCTTTTga	x|||||||:x||:|:x|x|:xx	aGAGGTAGTAGGTTGCATAGtt	PIAS4
bta-let-7g	ENSBTAT00000001000	ENSBTAG00000000753	778	799	-15.37	gCTCCATCGACCGATCTTTTga	x|||||||:x|x:|:x|x|:xx	tGAGGTAGTAGTTTGTACAGtt	PIAS4
bta-let-7a-5p	ENSBTAT00000001000	ENSBTAG00000000753	778	799	-20.67	gCTCCATCGACCGATCTTTTga	x|||||||:x||:|:x|x|:xx	tGAGGTAGTAGGTTGTATAGtt	PIAS4
bta-let-7b	ENSBTAT00000001000	ENSBTAG00000000753	778	799	-20.67	gCTCCATCGACCGATcttttga	x|||||||:x||:|:xxxxxxx	tGAGGTAGTAGGTTGtgtggtt	PIAS4
bta-let-7e	ENSBTAT00000001000	ENSBTAG00000000753	779	799	-19.21	gCTCCATCGACCGATCTTTtg	x|||||||xx||:|:x|x|xx	tGAGGTAGGAGGTTGTATAgt	PIAS4
bta-miR-92b	ENSBTAT00000001000	ENSBTAG00000000753	646	667	-12.47	aTAACGTGAaagttttttatgt	x||||||||xxxxxxxxxxxxx	tATTGCACTcgtcccggcctcc	PIAS4
bta-miR-1291	ENSBTAT00000001000	ENSBTAG00000000753	682	705	-20.29	cCCGGGACCGGTGTACGGctcaga	x|||||||x|::x|xx||xxxxxx	tGGCCCTGACTGAAGACCtgcagt	PIAS4
bta-miR-2431-3p	ENSBTAT00000001000	ENSBTAG00000000753	546	568	-22.89	tTGGGGGTGGGTGaggtaccgaa	x||||||||:::|xxxxxxxxxx	cACCCCCACTTGCatgaccctga	PIAS4
bta-miR-143	ENSBTAT00000038491	ENSBTAG00000000754	451	472	-14.69	tCTCTACTTCCTTTCGTattct	x|||||||||x|xx|:|xxxxx	tGAGATGAAGCACTGTAgctcg	PPP2R5A
bta-miR-671	ENSBTAT00000038491	ENSBTAG00000000754	869	893	-17.8	tCCTTCGGATGACGTaaaggaaatg	x|||||||xx|||x|xxxxxxxxxx	aGGAAGCC--CTGGAggggctggag	PPP2R5A
bta-miR-1291	ENSBTAT00000038491	ENSBTAG00000000754	738	760	-23.93	tCCGGGACGGAAGTC-GGAaaccc	x|||||||x||xx||x|||xxxxx	tGGCCCTGACTGAAGACCTgcagt	PPP2R5A
bta-miR-2370-5p	ENSBTAT00000038491	ENSBTAG00000000754	344	365	-10.1	tCCCTTTTTATGTgtctcgtct	x|||||||xx|x|xxxxxxxxx	tGGGAAAATGAAAgttggttat	PPP2R5A
bta-let-7d	ENSBTAT00000001013	ENSBTAG00000000764	229	250	-12.86	aCTCCATCCACCcctcttcccg	x|||||||xx||xxxxxxxxxx	aGAGGTAGTAGGttgcatagtt	GIPC1
bta-let-7g	ENSBTAT00000001013	ENSBTAG00000000764	231	250	-12.99	aCTCCATC--CACCCCTCTTcc	x|||||||xx||xx|x|x|:xx	tGAGGTAGTAGTTTGTACAGtt	GIPC1
bta-let-7a-5p	ENSBTAT00000001013	ENSBTAG00000000764	229	250	-15.64	aCTCCATCCACCcctcttcccg	x|||||||xx||xxxxxxxxxx	tGAGGTAGTAGGttgtatagtt	GIPC1
bta-let-7b	ENSBTAT00000001013	ENSBTAG00000000764	228	250	-18.23	aCTCCATCCACCCCTCTTCCCgc	x|||||||x|x||xx|x:x||xx	tGAGGTAG-TAGGTTGTGTGGtt	GIPC1
bta-let-7e	ENSBTAT00000001013	ENSBTAG00000000764	230	250	-19.64	aCTCCATCCACCcctcttccc	x||||||||x||xxxxxxxxx	tGAGGTAGGAGGttgtatagt	GIPC1
bta-miR-2335	ENSBTAT00000073748	ENSBTAG00000000764	928	949	-12.88	aCTATTAC-ACTTATATGGacat	x|||||||x|||x||x||:xxxx	aGATAATGATGACTA-ACTgaat	GIPC1
bta-miR-2431-3p	ENSBTAT00000001013	ENSBTAG00000000764	370	390	-23.58	cTGGGGGTT--TGTCTTGGGctc	x|||||||xxx:||x:||||xxx	cACCCCCACTTGCATGACCCtga	GIPC1
bta-miR-2431-3p	ENSBTAT00000073748	ENSBTAG00000000764	120	141	-27.37	gTGGGGGTGCG-GTCCCTGGAac	x||||||||x:x||x|xx|||xx	cACCCCCACTTGCATGACCCTga	GIPC1
bta-miR-6119-5p	ENSBTAT00000001013	ENSBTAG00000000764	514	536	-14.6	cCTCCATTGTCTGAggtgtcact	x|||||||x|x|:|xxxxxxxxx	aGAGGTAAAAAATTgatttgact	GIPC1
bta-miR-6535	ENSBTAT00000073748	ENSBTAG00000000764	489	509	-33.63	aTCCCCCTTCCCCAC-TCCTga	x|||||||:x||x||x||||xx	tAGGGGGAGCGGTTGGAGGAct	GIPC1
bta-miR-11991	ENSBTAT00000073748	ENSBTAG00000000764	449	469	-11.2	tACAAGACccgtctttgggtc	x|||||||xxxxxxxxxxxxx	aTGTTCTGtatcttgattgta	GIPC1
bta-miR-31	ENSBTAT00000079038	ENSBTAG00000000771	186	206	-15.49	gCCGTTCTCCcgggggccccc	x|||||||x|xxxxxxxxxxx	aGGCAAGATGctggcatagct	DNAJB6
bta-miR-10a	ENSBTAT00000072930	ENSBTAG00000000771	508	530	-17.96	gTGGGACACCACGGgaagggagg	x|||||||x|xx||xxxxxxxxx	tACCCTGTAGATCCgaatttgtg	DNAJB6
bta-miR-10a	ENSBTAT00000075017	ENSBTAG00000000771	508	530	-17.96	gTGGGACACCACGGgaagggagg	x|||||||x|xx||xxxxxxxxx	tACCCTGTAGATCCgaatttgtg	DNAJB6
bta-miR-10a	ENSBTAT00000079038	ENSBTAG00000000771	599	621	-20.85	cTGGGACAGGAGGGCCCAGGgac	x|||||||xxx:|||xx|::xxx	tACCCTGTAGATCCGAATTTgtg	DNAJB6
bta-miR-10b	ENSBTAT00000072930	ENSBTAG00000000771	508	530	-17.46	gTGGGACACCACGGgaagggagg	x|||||||x|xx||xxxxxxxxx	tACCCTGTAGAACCgaatttgtg	DNAJB6
bta-miR-10b	ENSBTAT00000075017	ENSBTAG00000000771	508	530	-17.46	gTGGGACACCACGGgaagggagg	x|||||||x|xx||xxxxxxxxx	tACCCTGTAGAACCgaatttgtg	DNAJB6
bta-miR-10b	ENSBTAT00000079038	ENSBTAG00000000771	599	621	-20.06	cTGGGACAGGAGGGCCCAGGgac	x|||||||xxxx|||xx|::xxx	tACCCTGTAGAACCGAATTTgtg	DNAJB6
bta-miR-1291	ENSBTAT00000079038	ENSBTAG00000000771	464	489	-24.06	aCCGGGACTCTTGGTTTTGctagcga	x||||||||xx:xx||:||xxxxxxx	tGGCCCTGACTG--AAGACctgcagt	DNAJB6
bta-miR-6121-3p	ENSBTAT00000079038	ENSBTAG00000000771	529	549	-19.61	cGCCTACTCCCCGGTGGacgg	x|||||||x||x|x||:xxxx	cCGGATGATGGAC-ACTgagg	DNAJB6
bta-miR-10162-5p	ENSBTAT00000079038	ENSBTAG00000000771	715	736	-35.7	gCCTGTCCTGTTCGG-GACAgga	x|||||||x||||||x||||xxx	tGGACAGGCCAAGCCGCTGTgca	DNAJB6
bta-miR-11991	ENSBTAT00000079038	ENSBTAG00000000771	846	865	-11.4	gACAAGACTT-GAGTgggtcg	x|||||||x|x||::xxxxxx	aTGTTCTGTATCTTGattgta	DNAJB6
bta-miR-31	ENSBTAT00000001024	ENSBTAG00000000773	1238	1257	-12.25	aCCGTTCTG-GTTCTTcaaaa	x|||||||:x|x:|x|xxxxx	aGGCAAGATGCTGGCAtagct	TTC9C
bta-miR-342	ENSBTAT00000001024	ENSBTAG00000000773	1111	1135	-14.32	tGAGTGTGTaacacctgtaatctta	x||||||||xxxxxxxxxxxxxxxx	tCTCACACAgaaatcgcacccatct	TTC9C
bta-miR-144	ENSBTAT00000001024	ENSBTAG00000000773	451	472	-13.55	gTGTCATACATAaacggtcaaa	x|||||||xx||xxxxxxxxxx	tACAGTATAGATgatgtactag	TTC9C
bta-miR-144	ENSBTAT00000071038	ENSBTAG00000000773	451	472	-13.55	gTGTCATACATAaacggtcaaa	x|||||||xx||xxxxxxxxxx	tACAGTATAGATgatgtactag	TTC9C
bta-miR-144	ENSBTAT00000076411	ENSBTAG00000000773	451	472	-13.55	gTGTCATACATAaacggtcaaa	x|||||||xx||xxxxxxxxxx	tACAGTATAGATgatgtactag	TTC9C
bta-miR-182	ENSBTAT00000001024	ENSBTAG00000000773	1454	1478	-14.72	aAACCGTTGTCAGATCCGAATCTtt	x|||||||::||xx|xx||x|x|xx	tTTGGCAATGGTAGAA-CTCACAct	TTC9C
bta-miR-671	ENSBTAT00000001024	ENSBTAG00000000773	1055	1078	-26.98	tCCTTCGGAGGATGCCTCGGTacc	x|||||||x|:x:x||:||::xxx	aGGAAGCC-CTGGAGGGGCTGgag	TTC9C
bta-miR-2370-5p	ENSBTAT00000001024	ENSBTAG00000000773	1522	1544	-16.1	cCCCTTTTCTCTTTTAGTCtttc	x|||||||xx||||:|::|xxxx	tGGGAAAAT-GAAAGTTGGttat	TTC9C
bta-miR-2370-5p	ENSBTAT00000071038	ENSBTAG00000000773	378	399	-10.56	tCCCTTTTGTaaggaaagacgg	x|||||||::xxxxxxxxxxxx	tGGGAAAATGaaagttggttat	TTC9C
bta-miR-2370-5p	ENSBTAT00000076411	ENSBTAG00000000773	378	399	-10.56	tCCCTTTTGTaaggaaagacgg	x|||||||::xxxxxxxxxxxx	tGGGAAAATGaaagttggttat	TTC9C
bta-miR-3613a	ENSBTAT00000001024	ENSBTAG00000000773	1332	1353	-10.28	cCAACATGATAAAttctcatgt	x||||||||x|||xxxxxxxxx	tGTTGTACTTTTTtttttgttc	TTC9C
bta-miR-574	ENSBTAT00000001024	ENSBTAG00000000773	635	660	-16.59	aCTCACACTCGTTATCGTTCcgatgt	x|||||||x|::x|x|::||xxxxxx	tGAGTGTGTGTG-T-GTGAGtgtgtg	TTC9C
bta-miR-181b	ENSBTAT00000081693	ENSBTAG00000000778	162	191	-20.74	tTGTAAGTTTGGGGTACAGTTTGCACCTct	x|||||||xx::x|x||||:xxx||||:xx	aACATTCA--TTGC-TGTCG---GTGGGtt	HSP90AB1
bta-miR-181c	ENSBTAT00000081693	ENSBTAG00000000778	168	191	-17.66	tTGTAAGTTTGGGGTACAGTTtgc	x||||||||x|:x:xx||x|:xxx	aACATTCAACCTGTCGGTGAGttt	HSP90AB1
bta-miR-10a	ENSBTAT00000001063	ENSBTAG00000000804	602	624	-11.42	cTGGGACAaaccccgtctctttt	x|||||||xxxxxxxxxxxxxxx	tACCCTGTagatccgaatttgtg	MOB3B
bta-miR-200a	ENSBTAT00000001063	ENSBTAG00000000804	821	844	-16.12	tTTGTGACGTGATTAgaccgagtc	x|||||||:x||::|xxxxxxxxx	tAACACTGT-CTGGTaacgatgtt	MOB3B
bta-miR-10b	ENSBTAT00000001063	ENSBTAG00000000804	602	624	-11.42	cTGGGACAaaccccgtctctttt	x|||||||xxxxxxxxxxxxxxx	tACCCTGTagaaccgaatttgtg	MOB3B
bta-miR-497	ENSBTAT00000001063	ENSBTAG00000000804	174	195	-18.71	aTCGTCGTGAGTCTCCCAACcc	x||||||||x|x|x||x|||xx	cAGCAGCACACTGTGGTTTGta	MOB3B
bta-miR-182	ENSBTAT00000001063	ENSBTAG00000000804	1136	1162	-18.98	tAACCGTTCCTACCTTCTTCCTTGTgc	x|||||||xxx|||x||||xxx|||xx	tTTGGCAA---TGGTAGAACTCACAct	MOB3B
bta-miR-2370-5p	ENSBTAT00000001063	ENSBTAG00000000804	543	564	-12.61	cCCCTTTTGgcgcgcctacgac	x|||||||:xxxxxxxxxxxxx	tGGGAAAATgaaagttggttat	MOB3B
bta-miR-143	ENSBTAT00000001066	ENSBTAG00000000806	1446	1467	-11.31	cCTCTACTTTATAAAATaaaaa	x||||||||:x|x|x||xxxxx	tGAGATGAAGCACTGTAgctcg	ATAD1
bta-miR-183	ENSBTAT00000001066	ENSBTAG00000000806	831	853	-18.84	tTACCGTGACTCCAAAAAGTttc	x|||||||||:xxxxx||||xxx	tATGGCACTGGTAGAATTCActg	ATAD1
bta-miR-2303	ENSBTAT00000001066	ENSBTAG00000000806	837	857	-13.59	cGACTTACCGTGACTccaaaa	x|||||||x:::x||xxxxxx	tCTGAATGATGTCGActgatg	ATAD1
bta-miR-6535	ENSBTAT00000001066	ENSBTAG00000000806	1085	1107	-20.65	gTCCCCCTAAGACTACacacata	x|||||||xx|x|x||xxxxxxx	tAGGGGGAG-CGGTTGgaggact	ATAD1
bta-miR-342	ENSBTAT00000001068	ENSBTAG00000000807	578	602	-11.89	cGAGTGTGAGTCTAaaataatcggc	x|||||||xx|x||xxxxxxxxxxx	tCTCACACAGAAATcgcacccatct	TMED3
bta-miR-342	ENSBTAT00000083758	ENSBTAG00000000807	48	72	-11.89	cGAGTGTGAGTCTAaaataatcggc	x|||||||xx|x||xxxxxxxxxxx	tCTCACACAGAAATcgcacccatct	TMED3
bta-miR-1291	ENSBTAT00000001069	ENSBTAG00000000808	73	98	-22.32	tCCGGGACCAGGAGAACTGAGTCTtt	x|||||||xxx||xxx|||x::x|xx	tGGCCCTGA--CTGAAGACCTGCAgt	COX14
bta-miR-200a	ENSBTAT00000001080	ENSBTAG00000000815	732	756	-14.99	aTTGTGACTGTCTCATCATTTACca	x|||||||x|x|x|||xx:|x||xx	tAACACTGTCTG-GTAACGA-TGtt	EPHA2
bta-miR-200a	ENSBTAT00000073445	ENSBTAG00000000815	732	756	-14.99	aTTGTGACTGTCTCATCATTTACca	x|||||||x|x|x|||xx:|x||xx	tAACACTGTCTG-GTAACGA-TGtt	EPHA2
bta-miR-671	ENSBTAT00000001080	ENSBTAG00000000815	41	63	-15.24	tCCTTCGGtcaggtaaagaagtt	x|||||||xxxxxxxxxxxxxxx	aGGAAGCCctggaggggctggag	EPHA2
bta-miR-671	ENSBTAT00000073445	ENSBTAG00000000815	41	63	-15.24	tCCTTCGGtcaggtaaagaagtt	x|||||||xxxxxxxxxxxxxxx	aGGAAGCCctggaggggctggag	EPHA2
bta-miR-574	ENSBTAT00000001080	ENSBTAG00000000815	485	508	-17.27	gCTCACACcgaggaggagcagagt	x|||||||xxxxxxxxxxxxxxxx	tGAGTGTGtgtgtgtgagtgtgtg	EPHA2
bta-miR-574	ENSBTAT00000073445	ENSBTAG00000000815	485	508	-17.27	gCTCACACcgaggaggagcagagt	x|||||||xxxxxxxxxxxxxxxx	tGAGTGTGtgtgtgtgagtgtgtg	EPHA2
bta-miR-2370-5p	ENSBTAT00000039096	ENSBTAG00000000817	813	832	-13.03	cCCCTTTT-CTT-CAGGTActc	x|||||||x|||x||:x:|xxx	tGGGAAAATGAAAGTTGGTtat	SYNJ2
bta-miR-2370-5p	ENSBTAT00000083000	ENSBTAG00000000817	813	832	-13.03	cCCCTTTT-CTT-CAGGTActc	x|||||||x|||x||:x:|xxx	tGGGAAAATGAAAGTTGGTtat	SYNJ2
bta-miR-574	ENSBTAT00000039096	ENSBTAG00000000817	770	792	-14.72	tCTCACACTTGT-TACCCATcgtg	x|||||||x:::x:||x||:xxxx	tGAGTGTGTGTGTGTGAGTGtgtg	SYNJ2
bta-miR-574	ENSBTAT00000083000	ENSBTAG00000000817	770	792	-14.72	tCTCACACTTGT-TACCCATcgtg	x|||||||x:::x:||x||:xxxx	tGAGTGTGTGTGTGTGAGTGtgtg	SYNJ2
bta-miR-6535	ENSBTAT00000039096	ENSBTAG00000000817	814	835	-20.26	tTCCCCCTTTTCttcaggtact	x|||||||:x:|xxxxxxxxxx	tAGGGGGAGCGGttggaggact	SYNJ2
bta-miR-6535	ENSBTAT00000083000	ENSBTAG00000000817	814	835	-20.26	tTCCCCCTTTTCttcaggtact	x|||||||:x:|xxxxxxxxxx	tAGGGGGAGCGGttggaggact	SYNJ2
bta-miR-10a	ENSBTAT00000001096	ENSBTAG00000000830	630	652	-15.97	gTGGGACAACTTTCCTTctaatg	x|||||||x||xxx|||xxxxxx	tACCCTGTAGATCCGAAtttgtg	GPR137B
bta-miR-200a	ENSBTAT00000001096	ENSBTAG00000000830	556	578	-19.84	gTTGTGACATTCCTTGGTTGatg	x||||||||xx||x|x|:|:xxx	tAACACTGTCTGGTAACGATgtt	GPR137B
bta-miR-10b	ENSBTAT00000001096	ENSBTAG00000000830	630	652	-17.11	gTGGGACAACTTTCCTTctaatg	x|||||||x|||xx|||xxxxxx	tACCCTGTAGAACCGAAtttgtg	GPR137B
bta-miR-182	ENSBTAT00000001096	ENSBTAG00000000830	601	627	-11.38	aAACCGTTTTAAATTCTCTAAGaaact	x|||||||x:x|xx|||x|x||xxxxx	tTTGGCAATGGT--AGA-ACTCacact	GPR137B
bta-miR-6119-5p	ENSBTAT00000001096	ENSBTAG00000000830	420	442	-10.77	gCTCCATTCCCAGACTccttatg	x|||||||xxxx:|||xxxxxxx	aGAGGTAAAAAATTGAtttgact	GPR137B
bta-miR-320a	ENSBTAT00000001098	ENSBTAG00000000833	628	650	-20.74	gTTTCGACACTAATTTTTTTaca	x|||||||x|:||:|:|:::xxx	aAAAGCTG-GGTTGAGAGGGcga	TAX1BP3
bta-miR-1291	ENSBTAT00000001098	ENSBTAG00000000833	198	223	-25.71	tCCGGGACA-ACGGTCAGGAGTCGTag	x|||||||xx||xx||x|||xx|||xx	tGGCCCTGACTGA-AGACCT--GCAgt	TAX1BP3
bta-miR-2370-5p	ENSBTAT00000001098	ENSBTAG00000000833	386	407	-13	tCCCTTTTcgcaccccgtgtcc	x|||||||xxxxxxxxxxxxxx	tGGGAAAAtgaaagttggttat	TAX1BP3
bta-miR-6535	ENSBTAT00000001098	ENSBTAG00000000833	175	196	-24.24	tTCCCCCTCTCTACCagggtct	x||||||||x|:|x|xxxxxxx	tAGGGGGAGCGGTTGgaggact	TAX1BP3
bta-miR-10162-5p	ENSBTAT00000001108	ENSBTAG00000000836	84	108	-18.82	tCCTGTCCCCGCTTTGGAGTCcaga	x|||||||xx|x||:||x|x|xxxx	tGGACAGG--CCAAGCCGCTGtgca	KRT8
bta-miR-148a	ENSBTAT00000001113	ENSBTAG00000000837	25	46	-14.9	aGTCACGTTTCGTgcggtcagt	x|||||||xxx||xxxxxxxxx	tCAGTGCACTACAgaactttgt	PARP1
bta-miR-320a	ENSBTAT00000001113	ENSBTAG00000000837	143	162	-20.06	tTTTCGACCC--TTTTAGCGac	x|||||||||xx:|:|xx||xx	aAAAGCTGGGTTGAGAGGGCga	PARP1
bta-miR-152	ENSBTAT00000001113	ENSBTAG00000000837	25	46	-16.62	aGTCACGTTTCGTgcggtcagt	x|||||||x:x||xxxxxxxxx	tCAGTGCATGACAgaacttggg	PARP1
bta-miR-2370-5p	ENSBTAT00000001113	ENSBTAG00000000837	131	156	-17.15	aCCCTTTTAGCGACTTTGTACactgg	x||||||||xxxx||||xx||xxxxx	tGGGAAAAT----GAAAGTTGgttat	PARP1
bta-miR-143	ENSBTAT00000001140	ENSBTAG00000000855	1197	1218	-17.75	aCTCTACTaggctttccgggac	x|||||||xxxxxxxxxxxxxx	tGAGATGAagcactgtagctcg	NXN
bta-miR-146b	ENSBTAT00000001140	ENSBTAG00000000855	773	797	-13.07	cCTCTTGAATGATTGTTGTAAGAtt	x|||||||x|x|xx||x:|xx||xx	tGAGAACTGAATTCCA-TAGGCTgt	NXN
bta-miR-671	ENSBTAT00000001140	ENSBTAG00000000855	1146	1168	-15.75	cCCTTCGGAAgatggggtttagg	x|||||||x|xxxxxxxxxxxxx	aGGAAGCCCTggaggggctggag	NXN
bta-miR-1291	ENSBTAT00000001140	ENSBTAG00000000855	1181	1204	-26.09	tCCGGGACTGtggactaactctat	x|||||||||xxxxxxxxxxxxxx	tGGCCCTGACtgaagacctgcagt	NXN
bta-miR-2370-5p	ENSBTAT00000001140	ENSBTAG00000000855	974	995	-13.93	tCCCTTTTCGATCCGAagaccg	x|||||||xxx|x|:|xxxxxx	tGGGAAAATGAAAGTTggttat	NXN
bta-miR-6535	ENSBTAT00000001140	ENSBTAG00000000855	36	57	-23.72	cTCCCCCTCCTCTTCTTACTca	x||||||||x:|xx|:|x||xx	tAGGGGGAGCGGTTGGAGGAct	NXN
bta-miR-2285bf	ENSBTAT00000001140	ENSBTAG00000000855	195	215	-10.77	gTTTGTGCcaccaaagaagac	x|||||||xxxxxxxxxxxxx	aAAACACGaacaaactttttg	NXN
bta-miR-2370-5p	ENSBTAT00000001141	ENSBTAG00000000856	28	52	-15.31	aCCCTTTTCTCCGTCTCGTCCcgac	x|||||||x:xxx|x||:x||xxxx	tGGGAAAATG---AAAGTTGGttat	FBXL6
bta-miR-574	ENSBTAT00000001142	ENSBTAG00000000857	102	125	-24.31	cCTCACACGTTGACAGGCACTCgt	x|||||||::xx|||xx|||x|xx	tGAGTGTGTGTGTGTGAGTGTGtg	SLC52A2
bta-miR-10162-5p	ENSBTAT00000001142	ENSBTAG00000000857	50	70	-26.65	aCCTGTCCG--TCAGAGACACcg	x||||||||xx||x|x|||||xx	tGGACAGGCCAAGCCGCTGTGca	SLC52A2
bta-miR-200a	ENSBTAT00000011029	ENSBTAG00000000874	427	447	-14.91	cTTGTGACTTCTTGT-GC-ACtc	x|||||||xxx:::|x||x||xx	tAACACTGTCTGGTAACGATGtt	CAST
bta-miR-200a	ENSBTAT00000067827	ENSBTAG00000000874	427	447	-14.91	cTTGTGACTTCTTGT-GC-ACtc	x|||||||xxx:::|x||x||xx	tAACACTGTCTGGTAACGATGtt	CAST
bta-miR-200a	ENSBTAT00000071010	ENSBTAG00000000874	427	447	-14.91	cTTGTGACTTCTTGT-GC-ACtc	x|||||||xxx:::|x||x||xx	tAACACTGTCTGGTAACGATGtt	CAST
bta-miR-200a	ENSBTAT00000079894	ENSBTAG00000000874	427	447	-14.91	cTTGTGACTTCTTGT-GC-ACtc	x|||||||xxx:::|x||x||xx	tAACACTGTCTGGTAACGATGtt	CAST
bta-miR-143	ENSBTAT00000011029	ENSBTAG00000000874	1405	1424	-20.55	aCTCTACTTC-TGTC-TCGtaa	x|||||||||x||x|x|||xxx	tGAGATGAAGCACTGTAGCtcg	CAST
bta-miR-144	ENSBTAT00000011029	ENSBTAG00000000874	1259	1281	-18.78	cTGTCATAGTCACTATGATGAtt	x|||||||x:x||||:x||||xx	tACAGTATAGATGATG-TACTag	CAST
bta-miR-144	ENSBTAT00000067827	ENSBTAG00000000874	517	539	-17.15	gTGTCATAAAATACTGACTGAat	x|||||||xxx||||:xx|||xx	tACAGTATAG-ATGATGTACTag	CAST
bta-miR-144	ENSBTAT00000071010	ENSBTAG00000000874	517	539	-17.15	gTGTCATAAAATACTGACTGAat	x|||||||xxx||||:xx|||xx	tACAGTATAG-ATGATGTACTag	CAST
bta-miR-144	ENSBTAT00000079894	ENSBTAG00000000874	517	539	-17.15	gTGTCATAAAATACTGACTGAat	x|||||||xxx||||:xx|||xx	tACAGTATAG-ATGATGTACTag	CAST
bta-miR-182	ENSBTAT00000011029	ENSBTAG00000000874	896	920	-19.89	aAACCGTTATTTGGGTTGAAGGTaa	x||||||||::x:xx||||xx||xx	tTTGGCAATGG-TAGAACTCACAct	CAST
bta-miR-182	ENSBTAT00000067827	ENSBTAG00000000874	896	920	-19.89	aAACCGTTATTTGGGTTGAAGGTaa	x||||||||::x:xx||||xx||xx	tTTGGCAATGG-TAGAACTCACAct	CAST
bta-miR-182	ENSBTAT00000071010	ENSBTAG00000000874	896	920	-19.89	aAACCGTTATTTGGGTTGAAGGTaa	x||||||||::x:xx||||xx||xx	tTTGGCAATGG-TAGAACTCACAct	CAST
bta-miR-182	ENSBTAT00000079894	ENSBTAG00000000874	896	920	-19.89	aAACCGTTATTTGGGTTGAAGGTaa	x||||||||::x:xx||||xx||xx	tTTGGCAATGG-TAGAACTCACAct	CAST
bta-miR-2370-5p	ENSBTAT00000011029	ENSBTAG00000000874	980	1000	-15	cCCCTTTT-TTTTTGTCTAAta	x|||||||x:|||::x|:||xx	tGGGAAAATGAAAGTTGGTTat	CAST
bta-miR-1468	ENSBTAT00000011029	ENSBTAG00000000874	1933	1954	-10.1	cAGGCAAAAGatttctctgtgt	x|||||||x|xxxxxxxxxxxx	cTCCGTTTGCctgttttgctga	CAST
bta-miR-503-3p	ENSBTAT00000011029	ENSBTAG00000000874	746	768	-11.57	aCTCATAAGAttcgtaatccaaa	x|||||||x|xxxxxxxxxxxxx	gGAGTATTGTttctgctgcccgg	CAST
bta-miR-503-3p	ENSBTAT00000067827	ENSBTAG00000000874	746	768	-11.57	aCTCATAAGAttcgtaatccaaa	x|||||||x|xxxxxxxxxxxxx	gGAGTATTGTttctgctgcccgg	CAST
bta-miR-503-3p	ENSBTAT00000071010	ENSBTAG00000000874	746	768	-11.57	aCTCATAAGAttcgtaatccaaa	x|||||||x|xxxxxxxxxxxxx	gGAGTATTGTttctgctgcccgg	CAST
bta-miR-503-3p	ENSBTAT00000079894	ENSBTAG00000000874	746	768	-11.57	aCTCATAAGAttcgtaatccaaa	x|||||||x|xxxxxxxxxxxxx	gGAGTATTGTttctgctgcccgg	CAST
bta-miR-106a	ENSBTAT00000001169	ENSBTAG00000000878	611	633	-14.56	gTTTCACGAAGAGTTCTGACatc	x|||||||||xx||:x:|x|xxx	aAAAGTGCTTA-CAGTGCAGgta	RB1CC1
bta-miR-10a	ENSBTAT00000001169	ENSBTAG00000000878	1001	1024	-11.42	cTGGGACAATGTAtcgtatgtcaa	x|||||||x|x||xxxxxxxxxxx	tACCCTGT-AGATccgaatttgtg	RB1CC1
bta-miR-10b	ENSBTAT00000001169	ENSBTAG00000000878	1002	1024	-11.42	cTGGGACAATGTATCGTAtgtca	x|||||||x:x|xx|x||xxxxx	tACCCTGTAGAACCGAATttgtg	RB1CC1
bta-miR-2335	ENSBTAT00000001169	ENSBTAG00000000878	244	263	-11.92	tCTATTACT--TGATcaaacca	x||||||||xx||||xxxxxxx	aGATAATGATGACTAactgaat	RB1CC1
bta-miR-2431-3p	ENSBTAT00000001169	ENSBTAG00000000878	656	679	-26.34	gTGGGGGTCGTGTGTGGAGGAAcc	x|||||||x|x::||:xx||x|xx	cACCCCCA-CTTGCATGACCCTga	RB1CC1
bta-miR-146b	ENSBTAT00000001187	ENSBTAG00000000894	280	304	-19.66	tCTCTTGATTCGATTGTGTCGGGtg	x|||||||:|x:|xx||:||x|:xx	tGAGAACTGAATTC-CATAGGCTgt	PGK1
bta-miR-11991	ENSBTAT00000001187	ENSBTAG00000000894	140	159	-17.15	tACAAGACGTTGA-CAAACtc	x|||||||:|x||x|x|||xx	aTGTTCTGTATCTTGATTGta	PGK1
bta-miR-92b	ENSBTAT00000001190	ENSBTAG00000000897	498	519	-10.54	tTAACGTGttttcaagagaaat	x|||||||xxxxxxxxxxxxxx	tATTGCACtcgtcccggcctcc	IQGAP2
bta-miR-106a	ENSBTAT00000001191	ENSBTAG00000000898	989	1009	-11.78	aTTTCACGG-TATTATTTTTat	x|||||||:x|x|:|:x|::xx	aAAAGTGCTTACAGTGCAGGta	F2RL2
bta-miR-574	ENSBTAT00000001191	ENSBTAG00000000898	564	586	-15.43	cCTCACAC-CGTCCGATGTCAagg	x|||||||x|::x|:x|xx||xxx	tGAGTGTGTGTGTGTGAGTGTgtg	F2RL2
bta-miR-10162-5p	ENSBTAT00000001191	ENSBTAG00000000898	470	491	-20.18	tCCTGTCCGAC-CGTCACTACtc	x||||||||xxx||x|xx:||xx	tGGACAGGCCAAGCCGCTGTGca	F2RL2
bta-miR-148a	ENSBTAT00000045447	ENSBTAG00000000902	1241	1262	-13.75	cGTCACGTCAaacgatgatgac	x|||||||x|xxxxxxxxxxxx	tCAGTGCACTacagaactttgt	OGT
bta-miR-148a	ENSBTAT00000070666	ENSBTAG00000000902	1241	1262	-13.75	cGTCACGTCAaacgatgatgac	x|||||||x|xxxxxxxxxxxx	tCAGTGCACTacagaactttgt	OGT
bta-miR-200a	ENSBTAT00000045447	ENSBTAG00000000902	887	908	-10.42	tTTGTGACC-ACTTTATCCAgtt	x|||||||xx||:x|xx|x|xxx	tAACACTGTCTGGTAACGATgtt	OGT
bta-miR-200a	ENSBTAT00000070666	ENSBTAG00000000902	887	908	-10.42	tTTGTGACC-ACTTTATCCAgtt	x|||||||xx||:x|xx|x|xxx	tAACACTGTCTGGTAACGATgtt	OGT
bta-miR-497	ENSBTAT00000045447	ENSBTAG00000000902	915	936	-13.26	tTCGTCGTATCTCCCTGtcagt	x|||||||x|xx|x|::xxxxx	cAGCAGCACACTGTGGTttgta	OGT
bta-miR-497	ENSBTAT00000070666	ENSBTAG00000000902	915	936	-13.26	tTCGTCGTATCTCCCTGtcagt	x|||||||x|xx|x|::xxxxx	cAGCAGCACACTGTGGTttgta	OGT
bta-miR-497	ENSBTAT00000082213	ENSBTAG00000000902	497	516	-22.19	gTCGTCGTCT--TACCAAAagt	x|||||||x|xx:||||||xxx	cAGCAGCACACTGTGGTTTgta	OGT
bta-miR-152	ENSBTAT00000045447	ENSBTAG00000000902	1238	1262	-15.04	cGTCACGTCAAACGATGATGActcc	x|||||||xxx||xx|xx|||xxxx	tCAGTGCA---TGACAGAACTtggg	OGT
bta-miR-152	ENSBTAT00000070666	ENSBTAG00000000902	1238	1262	-15.04	cGTCACGTCAAACGATGATGActcc	x|||||||xxx||xx|xx|||xxxx	tCAGTGCA---TGACAGAACTtggg	OGT
bta-miR-193a-5p	ENSBTAT00000001205	ENSBTAG00000000911	1075	1094	-19.41	tCCCAGAAGAGG--GCTCagat	x|||||||:x|xxx||||xxxx	tGGGTCTTTGCGGGCGAGatga	UBE2H
bta-miR-1468	ENSBTAT00000001205	ENSBTAG00000000911	418	439	-10.97	aAGGCAAAactttttcgtgata	x|||||||xxxxxxxxxxxxxx	cTCCGTTTgcctgttttgctga	UBE2H
bta-miR-6535	ENSBTAT00000001205	ENSBTAG00000000911	1026	1052	-27.16	tTCCCCCTCCGGTAGAGAACCTTCcac	x||||||||xxxxx|xx|||||:|xxx	tAGGGGGAG-----CGGTTGGAGGact	UBE2H
bta-miR-342	ENSBTAT00000001218	ENSBTAG00000000917	286	312	-23.49	gGAGTGTGTGACCCGACCCGGGGTctc	x||||||||xx|xxx|x|xx||||xxx	tCTCACACA--GAAATCGCACCCAtct	BMP1
bta-miR-1291	ENSBTAT00000001218	ENSBTAG00000000917	219	242	-22.07	aCCGGGACCGGGGAGTGAGGGTcc	x|||||||x|:xxxx||x:x||xx	tGGCCCTGACTGAAGACCTGCAgt	BMP1
bta-miR-6535	ENSBTAT00000001218	ENSBTAG00000000917	386	407	-28.69	cTCCCCCTCCCCACCCTTTgta	x||||||||x|||x|||::xxx	tAGGGGGAGCGGTTGGAGGact	BMP1
bta-miR-106a	ENSBTAT00000001241	ENSBTAG00000000937	56	77	-11.14	gTTTCACGGATacaaagataca	x|||||||:||xxxxxxxxxxx	aAAAGTGCTTAcagtgcaggta	ITPRID2
bta-miR-106a	ENSBTAT00000080319	ENSBTAG00000000937	164	185	-11.14	gTTTCACGGATacaaagataca	x|||||||:||xxxxxxxxxxx	aAAAGTGCTTAcagtgcaggta	ITPRID2
bta-miR-106a	ENSBTAT00000082749	ENSBTAG00000000937	164	185	-11.14	gTTTCACGGATacaaagataca	x|||||||:||xxxxxxxxxxx	aAAAGTGCTTAcagtgcaggta	ITPRID2
bta-miR-106a	ENSBTAT00000083392	ENSBTAG00000000937	164	185	-11.14	gTTTCACGGATacaaagataca	x|||||||:||xxxxxxxxxxx	aAAAGTGCTTAcagtgcaggta	ITPRID2
bta-miR-497	ENSBTAT00000080319	ENSBTAG00000000937	90	110	-18.81	gTCGTCGT-TCATAGAAGACtt	x|||||||x|x|:|xx|:||xx	cAGCAGCACACTGTGGTTTGta	ITPRID2
bta-miR-497	ENSBTAT00000082749	ENSBTAG00000000937	90	110	-18.81	gTCGTCGT-TCATAGAAGACtt	x|||||||x|x|:|xx|:||xx	cAGCAGCACACTGTGGTTTGta	ITPRID2
bta-miR-497	ENSBTAT00000083392	ENSBTAG00000000937	90	110	-18.81	gTCGTCGT-TCATAGAAGACtt	x|||||||x|x|:|xx|:||xx	cAGCAGCACACTGTGGTTTGta	ITPRID2
bta-miR-182	ENSBTAT00000001241	ENSBTAG00000000937	633	656	-16.71	aAACCGTTATTAgatgataaatca	x||||||||::|xxxxxxxxxxxx	tTTGGCAATGGTagaactcacact	ITPRID2
bta-miR-182	ENSBTAT00000080319	ENSBTAG00000000937	741	764	-16.71	aAACCGTTATTAgatgataaatca	x||||||||::|xxxxxxxxxxxx	tTTGGCAATGGTagaactcacact	ITPRID2
bta-miR-182	ENSBTAT00000082749	ENSBTAG00000000937	741	764	-16.71	aAACCGTTATTAgatgataaatca	x||||||||::|xxxxxxxxxxxx	tTTGGCAATGGTagaactcacact	ITPRID2
bta-miR-182	ENSBTAT00000083392	ENSBTAG00000000937	741	764	-16.71	aAACCGTTATTAgatgataaatca	x||||||||::|xxxxxxxxxxxx	tTTGGCAATGGTagaactcacact	ITPRID2
bta-miR-92b	ENSBTAT00000001241	ENSBTAG00000000937	266	286	-18.16	aTAACGTGT-CATTTATGGAgt	x|||||||xx||xxxx:|||xx	tATTGCACTCGTCCCGGCCTcc	ITPRID2
bta-miR-92b	ENSBTAT00000080319	ENSBTAG00000000937	374	394	-18.16	aTAACGTGT-CATTTATGGAgt	x|||||||xx||xxxx:|||xx	tATTGCACTCGTCCCGGCCTcc	ITPRID2
bta-miR-92b	ENSBTAT00000082749	ENSBTAG00000000937	374	394	-18.16	aTAACGTGT-CATTTATGGAgt	x|||||||xx||xxxx:|||xx	tATTGCACTCGTCCCGGCCTcc	ITPRID2
bta-miR-92b	ENSBTAT00000083392	ENSBTAG00000000937	374	394	-18.16	aTAACGTGT-CATTTATGGAgt	x|||||||xx||xxxx:|||xx	tATTGCACTCGTCCCGGCCTcc	ITPRID2
bta-miR-2431-3p	ENSBTAT00000080319	ENSBTAG00000000937	55	79	-27.26	gTGGGGGTGGTCACATATAGGAAct	x||||||||:xx||x||:x||x|xx	cACCCCCACT--TGCATGACCCTga	ITPRID2
bta-miR-2431-3p	ENSBTAT00000082749	ENSBTAG00000000937	55	79	-27.26	gTGGGGGTGGTCACATATAGGAAct	x||||||||:xx||x||:x||x|xx	cACCCCCACT--TGCATGACCCTga	ITPRID2
bta-miR-2431-3p	ENSBTAT00000083392	ENSBTAG00000000937	55	79	-27.26	gTGGGGGTGGTCACATATAGGAAct	x||||||||:xx||x||:x||x|xx	cACCCCCACT--TGCATGACCCTga	ITPRID2
bta-miR-106a	ENSBTAT00000001245	ENSBTAG00000000940	142	163	-15.21	aTTTCACGA-TGTGGACGgtttt	x||||||||x|||xx|||xxxxx	aAAAGTGCTTACAG-TGCaggta	TBCC
bta-miR-574	ENSBTAT00000001245	ENSBTAG00000000940	1278	1302	-20.31	gCTCACACCGTCGATACAAACAaat	x|||||||xxx|x|:||xx|||xxx	tGAGTGTGTGTG-TGTGAGTGTgtg	TBCC
bta-miR-148a	ENSBTAT00000001246	ENSBTAG00000000941	1757	1780	-17.26	gGTCACGTTGTAATTTTTGActca	x|||||||x:|xxx|:||||xxxx	tCAGTGCACTAC--AGAACTttgt	PLEKHB2
bta-miR-106a	ENSBTAT00000001246	ENSBTAG00000000941	2194	2212	-12.33	tTTTCACG--TGT-ACCTTTat	x|||||||xx|||x||x|::xx	aAAAGTGCTTACAGTGCAGGta	PLEKHB2
bta-miR-200a	ENSBTAT00000001246	ENSBTAG00000000941	863	880	-11.27	cTTGTGACG-----TTGATACcg	x|||||||:xxxxx|||x|||xx	tAACACTGTCTGGTAACGATGtt	PLEKHB2
bta-miR-200a	ENSBTAT00000077157	ENSBTAG00000000941	808	825	-11.27	cTTGTGACG-----TTGATACcg	x|||||||:xxxxx|||x|||xx	tAACACTGTCTGGTAACGATGtt	PLEKHB2
bta-miR-146b	ENSBTAT00000001246	ENSBTAG00000000941	2061	2084	-19.03	aCTCTTGACCTCGGtccctttact	x||||||||x|x:|xxxxxxxxxx	tGAGAACTGAATTCcataggctgt	PLEKHB2
bta-miR-152	ENSBTAT00000001246	ENSBTAG00000000941	1758	1780	-18.53	gGTCACGTTGTAATTTTTGACtc	x|||||||xx|xx|:||x:||xx	tCAGTGCATGAC-AGAACTTGgg	PLEKHB2
bta-miR-769	ENSBTAT00000001246	ENSBTAG00000000941	1291	1313	-16.99	tCTCTGGAAGTTACACGGaaaca	x|||||||x|::x||x|:xxxxx	tGAGACCTCCGG-GTTCTgagct	PLEKHB2
bta-miR-92b	ENSBTAT00000001246	ENSBTAG00000000941	31	52	-15.14	aTAACGTGTGCcccatagtctt	x|||||||x||xxxxxxxxxxx	tATTGCACTCGtcccggcctcc	PLEKHB2
bta-miR-2370-5p	ENSBTAT00000001246	ENSBTAG00000000941	2500	2519	-11.81	cCCCTTTT--TTTTACCTtgac	x|||||||xx|||:|x|:xxxx	tGGGAAAATGAAAGTTGGttat	PLEKHB2
bta-miR-6119-3p	ENSBTAT00000001246	ENSBTAG00000000941	40	63	-11.32	cGTTTAGTATAATAACGTGTGccc	x||||||||x||x||x|x|x|xxx	gCAAATCATTTT-TTACTCTCcaa	PLEKHB2
bta-miR-10162-5p	ENSBTAT00000001246	ENSBTAG00000000941	1926	1948	-13.74	cCCTGTCCCTGACCTCTACCCcc	x|||||||xxxx|xx|x||x|xx	tGGACAGGCCAAGCCGCTGTGca	PLEKHB2
bta-miR-181b	ENSBTAT00000001248	ENSBTAG00000000942	172	195	-19.31	aTGTAAGTAGAAGTGCCCACaacg	x||||||||:xx:::x||||xxxx	aACATTCATTGCTGTCGGTGggtt	SIPA1L2
bta-miR-181c	ENSBTAT00000001248	ENSBTAG00000000942	173	195	-15.36	aTGTAAGTAGAAGTGCC-CACAac	x|||||||x|x|xx|||x|x||xx	aACATTCAACCTGTCGGTGAGTtt	SIPA1L2
bta-miR-200a	ENSBTAT00000001248	ENSBTAG00000000942	603	624	-12.04	cTTGTGACA-ATTATaagtccgt	x||||||||x|::||xxxxxxxx	tAACACTGTCTGGTAacgatgtt	SIPA1L2
bta-miR-497	ENSBTAT00000001248	ENSBTAG00000000942	990	1011	-14.07	aTCGTCGTAGGTCAACAATCtt	x|||||||xx|x||x|||x|xx	cAGCAGCACACTGTGGTTTGta	SIPA1L2
bta-miR-183	ENSBTAT00000001248	ENSBTAG00000000942	744	767	-21.81	gTACCGTGTGTCCTCTCGAGAGca	x|||||||x::|x|||x:||x|xx	tATGGCAC-TGGTAGAATTCACtg	SIPA1L2
bta-miR-1468	ENSBTAT00000001248	ENSBTAG00000000942	239	262	-19.9	gAGGCAAAGTCGTCTCGGACtttc	x|||||||xx||xx:x::||xxxx	cTCCGTTT--GCCTGTTTTGctga	SIPA1L2
bta-miR-6119-5p	ENSBTAT00000001248	ENSBTAG00000000942	260	282	-12.36	aCTCCATTcgggtgtgtctcgag	x|||||||xxxxxxxxxxxxxxx	aGAGGTAAaaaattgatttgact	SIPA1L2
bta-miR-106a	ENSBTAT00000001247	ENSBTAG00000000943	2608	2630	-12.66	gTTTCACGACCATAAACCTTCac	x||||||||xxx|x|x|x|:|xx	aAAAGTGCTTACAGT-GCAGGta	ZNF286A
bta-miR-193a-5p	ENSBTAT00000001247	ENSBTAG00000000943	61	82	-14.9	aCCCAGAAGgaggatttggtga	x|||||||:xxxxxxxxxxxxx	tGGGTCTTTgcgggcgagatga	ZNF286A
bta-miR-193a-5p	ENSBTAT00000070487	ENSBTAG00000000943	61	82	-14.9	aCCCAGAAGgaggatttggtga	x|||||||:xxxxxxxxxxxxx	tGGGTCTTTgcgggcgagatga	ZNF286A
bta-miR-193a-5p	ENSBTAT00000084481	ENSBTAG00000000943	61	82	-14.9	aCCCAGAAGgaggatttggtga	x|||||||:xxxxxxxxxxxxx	tGGGTCTTTgcgggcgagatga	ZNF286A
bta-miR-146b	ENSBTAT00000001247	ENSBTAG00000000943	1322	1345	-12.57	aCTCTTGAgattcctcattacccc	x|||||||xxxxxxxxxxxxxxxx	tGAGAACTgaattccataggctgt	ZNF286A
bta-miR-671	ENSBTAT00000001247	ENSBTAG00000000943	522	542	-18.91	cCCTTCGG--TCTCACataaagt	x|||||||xx:|||x|xxxxxxx	aGGAAGCCCTGGAGGGgctggag	ZNF286A
bta-miR-671	ENSBTAT00000070487	ENSBTAG00000000943	522	542	-18.91	cCCTTCGG--TCTCACataaagt	x|||||||xx:|||x|xxxxxxx	aGGAAGCCCTGGAGGGgctggag	ZNF286A
bta-miR-671	ENSBTAT00000084481	ENSBTAG00000000943	522	542	-18.91	cCCTTCGG--TCTCACataaagt	x|||||||xx:|||x|xxxxxxx	aGGAAGCCCTGGAGGGgctggag	ZNF286A
bta-miR-2370-5p	ENSBTAT00000001247	ENSBTAG00000000943	1289	1311	-18.16	cCCCTTTTCGCACCCGACCGAca	x|||||||x:|xxx|:|||:|xx	tGGGAAAA-TGAAAGTTGGTTat	ZNF286A
bta-miR-2431-3p	ENSBTAT00000001247	ENSBTAG00000000943	1392	1412	-22.12	aTGGGGGTGAAATT--TGAGAag	x||||||||||xx|xx||x||xx	cACCCCCACTTGCATGACCCTga	ZNF286A
bta-miR-6119-5p	ENSBTAT00000001247	ENSBTAG00000000943	787	809	-13.57	aCTCCATTTCCTCACTttagagg	x||||||||xx|x|||xxxxxxx	aGAGGTAAAAAATTGAtttgact	ZNF286A
bta-miR-6119-5p	ENSBTAT00000070487	ENSBTAG00000000943	787	809	-13.57	aCTCCATTTCCTCACTttagagg	x||||||||xx|x|||xxxxxxx	aGAGGTAAAAAATTGAtttgact	ZNF286A
bta-miR-6119-5p	ENSBTAT00000084481	ENSBTAG00000000943	787	809	-13.57	aCTCCATTTCCTCACTttagagg	x||||||||xx|x|||xxxxxxx	aGAGGTAAAAAATTGAtttgact	ZNF286A
bta-miR-6119-3p	ENSBTAT00000001247	ENSBTAG00000000943	2343	2367	-15.22	tGTTTAGTGAATCACTGTAAAGtga	x|||||||:||xx|x||x|x||xxx	gCAAATCATTTTTT-AC-TCTCcaa	ZNF286A
bta-miR-6535	ENSBTAT00000001247	ENSBTAG00000000943	310	328	-23.41	cTCCCCCTTG---ACCTgaagt	x|||||||:|xxx||||xxxxx	tAGGGGGAGCGGTTGGAggact	ZNF286A
bta-miR-6535	ENSBTAT00000070487	ENSBTAG00000000943	310	328	-23.41	cTCCCCCTTG---ACCTgaagt	x|||||||:|xxx||||xxxxx	tAGGGGGAGCGGTTGGAggact	ZNF286A
bta-miR-6535	ENSBTAT00000084481	ENSBTAG00000000943	310	328	-23.41	cTCCCCCTTG---ACCTgaagt	x|||||||:|xxx||||xxxxx	tAGGGGGAGCGGTTGGAggact	ZNF286A
bta-miR-10162-5p	ENSBTAT00000001247	ENSBTAG00000000943	1253	1275	-13.75	tCCTGTCCtaaatcctcttctct	x|||||||xxxxxxxxxxxxxxx	tGGACAGGccaagccgctgtgca	ZNF286A
bta-miR-2285bf	ENSBTAT00000001247	ENSBTAG00000000943	2982	3009	-12.43	gTTTGTGCGTCAGTCTAATTTGAGAAtt	x|||||||x|xx||xxxxx||||:||xx	aAAACACGAA--CA-----AACTTTTtg	ZNF286A
bta-miR-10a	ENSBTAT00000001250	ENSBTAG00000000944	1765	1787	-18.27	gTGGGACACCCCGGggacgtccg	x|||||||x|xx||xxxxxxxxx	tACCCTGTAGATCCgaatttgtg	LPCAT1
bta-miR-181b	ENSBTAT00000001250	ENSBTAG00000000944	1685	1708	-14.56	aTGTAAGTGTCGAGActtgggtgc	x|||||||:x|||x|xxxxxxxxx	aACATTCATTGCTGTcggtgggtt	LPCAT1
bta-miR-181c	ENSBTAT00000001250	ENSBTAG00000000944	1684	1708	-13.22	aTGTAAGTGTCGAGActtgggtgcc	x|||||||x|x||x|xxxxxxxxxx	aACATTCA-ACCTGTcggtgagttt	LPCAT1
bta-miR-10b	ENSBTAT00000001250	ENSBTAG00000000944	1765	1787	-18.27	gTGGGACACCCCGGggacgtccg	x|||||||x|xx||xxxxxxxxx	tACCCTGTAGAACCgaatttgtg	LPCAT1
bta-miR-2303	ENSBTAT00000001250	ENSBTAG00000000944	409	426	-12.53	cGACTTACAA-AG--GACTtc	x|||||||x|x||xx||||xx	tCTGAATGATGTCGACTGAtg	LPCAT1
bta-miR-574	ENSBTAT00000001250	ENSBTAG00000000944	29	54	-18.47	cCTCACACTCCGGCCGACTCGTGTcc	x|||||||x|xx:|xx||||::::xx	tGAGTGTGTGTGTG--TGAGTGTGtg	LPCAT1
bta-miR-6535	ENSBTAT00000001250	ENSBTAG00000000944	1712	1733	-21.35	tTCCCCCTaagtggggactcga	x|||||||xxxxxxxxxxxxxx	tAGGGGGAgcggttggaggact	LPCAT1
bta-miR-11991	ENSBTAT00000001250	ENSBTAG00000000944	1221	1243	-13.15	aACAAGACGTTAAGGTCGAGacc	x|||||||:|xx||:x|x|:xxx	aTGTTCTGTA--TCTTGATTgta	LPCAT1
bta-miR-192	ENSBTAT00000001253	ENSBTAG00000000948	205	227	-12.49	aACTGGATCTTTAGTTTACGttt	x|||||||x:|||::|xx||xxx	cTGACCTATGAATTGACAGCcag	RAB2A
bta-miR-144	ENSBTAT00000001253	ENSBTAG00000000948	522	545	-17.72	tTGTCATATCTTAAATACGTttac	x||||||||||xx|x|||:|xxxx	tACAGTATAGA--TGATGTActag	RAB2A
bta-miR-182	ENSBTAT00000001253	ENSBTAG00000000948	484	505	-15.42	gAACCGTT--TAATGTGGGTtcgt	x|||||||xx:|x:x||:||xxxx	tTTGGCAATGGTAGAACTCAcact	RAB2A
bta-miR-11991	ENSBTAT00000001255	ENSBTAG00000000950	45	65	-12.05	cACAAGACGTGTTTATAAaat	x|||||||:|:xxxx|||xxx	aTGTTCTGTATCTTGATTgta	MRPS16
bta-miR-1949	ENSBTAT00000001264	ENSBTAG00000000955	135	157	-19.45	aTATGGTCCTATTGaatgaagaa	x||||||||||:x|xxxxxxxxx	tATACCAGGATGCCagcatagtt	RBM41
bta-miR-1949	ENSBTAT00000081226	ENSBTAG00000000955	135	157	-19.45	aTATGGTCCTATTGaatgaagaa	x||||||||||:x|xxxxxxxxx	tATACCAGGATGCCagcatagtt	RBM41
bta-miR-181b	ENSBTAT00000001266	ENSBTAG00000000957	395	418	-17.08	cTGTAAGTTTATGATA-CCAgggga	x|||||||xx|:||:|x|||xxxxx	aACATTCAT-TGCTGTCGGTgggtt	CDKN2AIP
bta-miR-181c	ENSBTAT00000001266	ENSBTAG00000000957	394	418	-14.51	cTGTAAGTTTATGATA-CCAggggaa	x||||||||xxx||:|x|||xxxxxx	aACATTCAAC--CTGTCGGTgagttt	CDKN2AIP
bta-miR-146b	ENSBTAT00000001266	ENSBTAG00000000957	117	142	-15.93	tCTCTTGATCTTACATTTAAAAGAcg	x|||||||x||||x|xx||xxx||xx	tGAGAACT-GAAT-TCCATAGGCTgt	CDKN2AIP
bta-miR-2335	ENSBTAT00000001266	ENSBTAG00000000957	15	34	-16.18	tCTATTAC-A-TGTGTGACTat	x|||||||x|x||xx|||||xx	aGATAATGATGACTAACTGAat	CDKN2AIP
bta-miR-1949	ENSBTAT00000001266	ENSBTAG00000000957	16	40	-15.37	tTATGGTCTATTACATGTGTGACta	x|||||||:xx|||xxx:||:x|xx	tATACCAGG--ATGCCAGCATAGtt	CDKN2AIP
bta-miR-200a	ENSBTAT00000001290	ENSBTAG00000000974	390	412	-18.16	gTTGTGACAGGTAAggaaattgt	x|||||||||::x|xxxxxxxxx	tAACACTGTCTGGTaacgatgtt	IARS1
bta-miR-574	ENSBTAT00000001290	ENSBTAG00000000974	320	343	-32.59	aCTCACACACACACACACctgtgt	x|||||||||||||||x|xxxxxx	tGAGTGTGTGTGTGTGAGtgtgtg	IARS1
bta-miR-6119-5p	ENSBTAT00000001290	ENSBTAG00000000974	226	246	-14.17	aCTCCATTGT--GGTTGAAaggg	x|||||||x|xx:::|:||xxxx	aGAGGTAAAAAATTGATTTgact	IARS1
bta-miR-10162-5p	ENSBTAT00000001290	ENSBTAG00000000974	31	54	-18.97	tCCTGTCCATATACGGTccctttg	x|||||||xxx|x|||:xxxxxxx	tGGACAGGCCAA-GCCGctgtgca	IARS1
bta-miR-320a	ENSBTAT00000001294	ENSBTAG00000000978	564	584	-12.4	aTTTCGACGTT-CGTTCACGga	x|||||||x:xx|x:||x||xx	aAAAGCTGGGTTGAGAGGGCga	ASH2L
bta-miR-193a-5p	ENSBTAT00000001294	ENSBTAG00000000978	90	109	-21.04	cCCCAGAA--GCCCTTTTGAac	x|||||||xx||||x:|:x|xx	tGGGTCTTTGCGGGCGAGATga	ASH2L
bta-miR-1291	ENSBTAT00000001294	ENSBTAG00000000978	99	123	-19.13	tCCGGGACAAGACaccccagaagcc	x|||||||xx|||xxxxxxxxxxxx	tGGCCCTGA-CTGaagacctgcagt	ASH2L
bta-miR-2370-5p	ENSBTAT00000001294	ENSBTAG00000000978	76	101	-15.78	gCCCTTTTGAACGTTGTCAATTtttt	x|||||||xx||x||x||||::xxxx	tGGGAAAA--TG-AA-AGTTGGttat	ASH2L
bta-miR-11991	ENSBTAT00000001294	ENSBTAG00000000978	98	118	-12	gACAAGACAccccagaagccc	x||||||||xxxxxxxxxxxx	aTGTTCTGTatcttgattgta	ASH2L
bta-miR-497	ENSBTAT00000001296	ENSBTAG00000000979	653	675	-27.92	gTCGTCGTGTCGGGACCGTACcg	x|||||||||x|:x|||:x||xx	cAGCAGCACA-CTGTGGTTTGta	SMIM19
bta-miR-497	ENSBTAT00000064873	ENSBTAG00000000979	653	675	-27.92	gTCGTCGTGTCGGGACCGTACcg	x|||||||||x|:x|||:x||xx	cAGCAGCACA-CTGTGGTTTGta	SMIM19
bta-miR-144	ENSBTAT00000001296	ENSBTAG00000000979	1269	1289	-10.43	tTGTCATAA-TATTGTTTaggt	x|||||||xx||:|::x|xxxx	tACAGTATAGATGATGTActag	SMIM19
bta-miR-144	ENSBTAT00000064873	ENSBTAG00000000979	1269	1289	-10.43	tTGTCATAA-TATTGTTTaggt	x|||||||xx||:|::x|xxxx	tACAGTATAGATGATGTActag	SMIM19
bta-miR-2332	ENSBTAT00000001296	ENSBTAG00000000979	756	779	-12.96	aCCAAATTTTTTTTTTTTTtcggg	x|||||||::xxxx::|:|xxxxx	cGGTTTAAGGTCTTGGAGAcaaag	SMIM19
bta-miR-2332	ENSBTAT00000064873	ENSBTAG00000000979	756	779	-12.96	aCCAAATTTTTTTTTTTTTtcggg	x|||||||::xxxx::|:|xxxxx	cGGTTTAAGGTCTTGGAGAcaaag	SMIM19
bta-miR-6119-5p	ENSBTAT00000001296	ENSBTAG00000000979	258	280	-14.17	gCTCCATTCTGACGGTGGAgacg	x|||||||x|xxx:x|::|xxxx	aGAGGTAAAAAATTGATTTgact	SMIM19
bta-miR-6119-5p	ENSBTAT00000064873	ENSBTAG00000000979	258	280	-14.17	gCTCCATTCTGACGGTGGAgacg	x|||||||x|xxx:x|::|xxxx	aGAGGTAAAAAATTGATTTgact	SMIM19
bta-miR-6119-3p	ENSBTAT00000001296	ENSBTAG00000000979	1761	1783	-10.51	aGTTTAGTCGActctatcggtca	x|||||||x:|xxxxxxxxxxxx	gCAAATCATTTtttactctccaa	SMIM19
bta-miR-6119-3p	ENSBTAT00000064873	ENSBTAG00000000979	1761	1783	-10.51	aGTTTAGTCGActctatcggtca	x|||||||x:|xxxxxxxxxxxx	gCAAATCATTTtttactctccaa	SMIM19
bta-miR-497	ENSBTAT00000001303	ENSBTAG00000000985	772	793	-12.83	tTCGTCGTACGTCcttctctgt	x|||||||xx|x|xxxxxxxxx	cAGCAGCACACTGtggtttgta	RAB10
bta-miR-3613a	ENSBTAT00000001303	ENSBTAG00000000985	357	378	-12.73	aCAACATGttttattttaacaa	x|||||||xxxxxxxxxxxxxx	tGTTGTACttttttttttgttc	RAB10
bta-miR-320a	ENSBTAT00000001309	ENSBTAG00000000990	164	187	-19.12	tTTTCGACCTTCAATTaaattctc	x||||||||xx|||:|xxxxxxxx	aAAAGCTGG--GTTGAgagggcga	PSMA2
bta-miR-181b	ENSBTAT00000001343	ENSBTAG00000001013	241	266	-16.47	gTGTAAGTGAGTTTAAAGTCcaaacg	x|||||||:|xx:x|x||:|xxxxxx	aACATTCATT--GCTGTCGGtgggtt	SLC30A5
bta-miR-30e-5p	ENSBTAT00000001343	ENSBTAG00000001013	324	347	-12.87	tCATTTGTGTGTCTTCATTaaaac	x|||||||:x|xx:|x|::xxxxx	tGTAAACATCCTTGACTGGaagct	SLC30A5
bta-miR-181c	ENSBTAT00000001343	ENSBTAG00000001013	243	266	-11.63	gTGTAAGTgagtttaaagtccaaa	x|||||||xxxxxxxxxxxxxxxx	aACATTCAacctgtcggtgagttt	SLC30A5
bta-miR-30a-5p	ENSBTAT00000001343	ENSBTAG00000001013	324	347	-12.87	tCATTTGTGTGTCTTCATTaaaac	x|||||||:x|xx:|x|::xxxxx	tGTAAACATCCTCGACTGGaagct	SLC30A5
bta-miR-10a	ENSBTAT00000001347	ENSBTAG00000001014	842	861	-19.14	cTGGGACA---GGGCTTcctgta	x|||||||xxx:|||||xxxxxx	tACCCTGTAGATCCGAAtttgtg	MAPK7
bta-miR-10b	ENSBTAT00000001347	ENSBTAG00000001014	842	861	-19.51	cTGGGACAG---GGCTTcctgta	x|||||||xxxx|||||xxxxxx	tACCCTGTAGAACCGAAtttgtg	MAPK7
bta-miR-143	ENSBTAT00000001347	ENSBTAG00000001014	110	129	-24.04	aCTCTACTTCG--ACGTCttac	x||||||||||xx||:||xxxx	tGAGATGAAGCACTGTAGctcg	MAPK7
bta-miR-769	ENSBTAT00000001347	ENSBTAG00000001014	287	309	-15.28	cCTCTGGAACATAAAGTGTTCgt	x|||||||xxx:x|||x::||xx	tGAGACCTCCGGGTTC-TGAGct	MAPK7
bta-miR-92b	ENSBTAT00000001347	ENSBTAG00000001014	630	652	-25.96	gTAACGTGAGTGCGAGTCGccgg	x|||||||||::x|x|:||xxxx	tATTGCACTCGTCC-CGGCctcc	MAPK7
bta-miR-574	ENSBTAT00000001347	ENSBTAG00000001014	475	498	-22.74	aCTCACACTGACACGATCCCAgtc	x|||||||xx||||:x||x||xxx	tGAGTGTGTGTGTGTGAGTGTgtg	MAPK7
bta-miR-31	ENSBTAT00000001344	ENSBTAG00000001015	1113	1132	-20.93	tCCGTTCT-CGAGTCTGTCct	x|||||||x|||x:x|:||xx	aGGCAAGATGCTGGCATAGct	TM9SF4
bta-miR-200a	ENSBTAT00000001344	ENSBTAG00000001015	105	128	-15.13	cTTGTGACACGGTCCTcaatgtaa	x||||||||x|::|x|xxxxxxxx	tAACACTGT-CTGGTAacgatgtt	TM9SF4
bta-miR-497	ENSBTAT00000001344	ENSBTAG00000001015	920	941	-16.45	cTCGTCGTGTagggggaggggc	x|||||||||xxxxxxxxxxxx	cAGCAGCACActgtggtttgta	TM9SF4
bta-miR-196a	ENSBTAT00000001344	ENSBTAG00000001015	1139	1161	-19.72	gTCCATCACAAGACCCACAAggg	x|||||||x|||xx|x||||xxx	tAGGTAGT-TTCATGTTGTTggg	TM9SF4
bta-miR-2370-5p	ENSBTAT00000001344	ENSBTAG00000001015	1633	1657	-11.46	tCCCTTTTTTTAAGTTCTACactta	x|||||||x:|xxx|||x||xxxxx	tGGGAAAATGA---AAGTTGgttat	TM9SF4
bta-miR-181b	ENSBTAT00000001348	ENSBTAG00000001016	218	244	-22.83	tTGTAAGTAGTTACGTAAGCTATTCtg	x||||||||::x||xxx|||:|::|xx	aACATTCATTGCTG---TCGGTGGGtt	NAA35
bta-miR-181c	ENSBTAT00000001348	ENSBTAG00000001016	217	244	-18.17	tTGTAAGTAGTTACGTAAGCTATTCtga	x|||||||x|xx||xxx|||:|:||xxx	aACATTCAACC-TG---TCGGTGAGttt	NAA35
bta-miR-144	ENSBTAT00000001346	ENSBTAG00000001017	249	272	-10.76	tTGTCATAGATTTATTGTGctaaa	x|||||||xx|:||:|:::xxxxx	tACAGTAT--AGATGATGTactag	SLK
bta-let-7d	ENSBTAT00000074115	ENSBTAG00000001022	263	282	-17.03	tCTCCATC--CCACCccgccgg	x|||||||xx|||x|xxxxxxx	aGAGGTAGTAGGTTGcatagtt	AMDHD2
bta-let-7d	ENSBTAT00000084975	ENSBTAG00000001022	263	282	-17.03	tCTCCATC--CCACCccgccgg	x|||||||xx|||x|xxxxxxx	aGAGGTAGTAGGTTGcatagtt	AMDHD2
bta-let-7g	ENSBTAT00000074115	ENSBTAG00000001022	261	282	-14.52	tCTCCATCccaccccgccggtg	x|||||||xxxxxxxxxxxxxx	tGAGGTAGtagtttgtacagtt	AMDHD2
bta-let-7g	ENSBTAT00000084975	ENSBTAG00000001022	261	282	-14.52	tCTCCATCccaccccgccggtg	x|||||||xxxxxxxxxxxxxx	tGAGGTAGtagtttgtacagtt	AMDHD2
bta-let-7a-5p	ENSBTAT00000074115	ENSBTAG00000001022	263	282	-13.41	tCTCCATC--CCACCccgccgg	x|||||||xx|||x|xxxxxxx	tGAGGTAGTAGGTTGtatagtt	AMDHD2
bta-let-7a-5p	ENSBTAT00000084975	ENSBTAG00000001022	263	282	-13.41	tCTCCATC--CCACCccgccgg	x|||||||xx|||x|xxxxxxx	tGAGGTAGTAGGTTGtatagtt	AMDHD2
bta-miR-342	ENSBTAT00000074115	ENSBTAG00000001022	397	421	-19.95	aGAGTGTGaacgagggattcgggga	x|||||||xxxxxxxxxxxxxxxxx	tCTCACACagaaatcgcacccatct	AMDHD2
bta-miR-342	ENSBTAT00000084975	ENSBTAG00000001022	397	421	-19.95	aGAGTGTGaacgagggattcgggga	x|||||||xxxxxxxxxxxxxxxxx	tCTCACACagaaatcgcacccatct	AMDHD2
bta-let-7b	ENSBTAT00000074115	ENSBTAG00000001022	263	282	-21.25	tCTCCATC--CCACCCCGCCgg	x|||||||xx|||x|x|:||xx	tGAGGTAGTAGGTTGTGTGGtt	AMDHD2
bta-let-7b	ENSBTAT00000084975	ENSBTAG00000001022	263	282	-21.25	tCTCCATC--CCACCCCGCCgg	x|||||||xx|||x|x|:||xx	tGAGGTAGTAGGTTGTGTGGtt	AMDHD2
bta-let-7e	ENSBTAT00000074115	ENSBTAG00000001022	262	282	-17.18	tCTCCATCCcaccccgccggt	x||||||||xxxxxxxxxxxx	tGAGGTAGGaggttgtatagt	AMDHD2
bta-let-7e	ENSBTAT00000084975	ENSBTAG00000001022	262	282	-17.18	tCTCCATCCcaccccgccggt	x||||||||xxxxxxxxxxxx	tGAGGTAGGaggttgtatagt	AMDHD2
bta-miR-92b	ENSBTAT00000074115	ENSBTAG00000001022	809	830	-15.38	gTAACGTGGACGAGTCCtcagt	x|||||||:x|:x|x||xxxxx	tATTGCACTCGTCCCGGcctcc	AMDHD2
bta-miR-92b	ENSBTAT00000084975	ENSBTAG00000001022	809	830	-15.38	gTAACGTGGACGAGTCCtcagt	x|||||||:x|:x|x||xxxxx	tATTGCACTCGTCCCGGcctcc	AMDHD2
bta-miR-2431-3p	ENSBTAT00000074115	ENSBTAG00000001022	210	232	-23.16	gTGGGGGTGGTTGCCCCGTGttc	x||||||||:x:|xx|x|x|xxx	cACCCCCACTTGCATGACCCtga	AMDHD2
bta-miR-2431-3p	ENSBTAT00000084975	ENSBTAG00000001022	210	232	-23.16	gTGGGGGTGGTTGCCCCGTGttc	x||||||||:x:|xx|x|x|xxx	cACCCCCACTTGCATGACCCtga	AMDHD2
bta-miR-31	ENSBTAT00000081502	ENSBTAG00000001024	993	1012	-15.53	aCCGTTCTCTAATT-TATCga	x|||||||x:x|::x||||xx	aGGCAAGATGCTGGCATAGct	ARID1A
bta-miR-144	ENSBTAT00000081502	ENSBTAG00000001024	593	617	-17.94	aTGTCATAGTCCACATGTCATGtca	x|||||||x||x||x|:x||||xxx	tACAGTAT-AGATG-AT-GTACtag	ARID1A
bta-miR-769	ENSBTAT00000081502	ENSBTAG00000001024	1029	1050	-14.9	tCTCTGGAcatgtcgtagcgtg	x|||||||xxxxxxxxxxxxxx	tGAGACCTccgggttctgagct	ARID1A
bta-miR-6535	ENSBTAT00000001360	ENSBTAG00000001024	152	171	-28.37	tTCCCCCTCCTT--TCTCCTtt	x||||||||x::xx:|||||xx	tAGGGGGAGCGGTTGGAGGAct	ARID1A
bta-miR-6535	ENSBTAT00000081502	ENSBTAG00000001024	152	171	-28.37	tTCCCCCTCCTT--TCTCCTtt	x||||||||x::xx:|||||xx	tAGGGGGAGCGGTTGGAGGAct	ARID1A
bta-miR-6535	ENSBTAT00000087165	ENSBTAG00000001024	152	171	-28.37	tTCCCCCTCCTT--TCTCCTtt	x||||||||x::xx:|||||xx	tAGGGGGAGCGGTTGGAGGAct	ARID1A
bta-miR-10162-5p	ENSBTAT00000001360	ENSBTAG00000001024	195	217	-15.36	tCCTGTCCctgatctttccactc	x|||||||xxxxxxxxxxxxxxx	tGGACAGGccaagccgctgtgca	ARID1A
bta-miR-10162-5p	ENSBTAT00000081502	ENSBTAG00000001024	195	217	-15.36	tCCTGTCCctgatctttccactc	x|||||||xxxxxxxxxxxxxxx	tGGACAGGccaagccgctgtgca	ARID1A
bta-miR-10162-5p	ENSBTAT00000087165	ENSBTAG00000001024	195	217	-15.36	tCCTGTCCctgatctttccactc	x|||||||xxxxxxxxxxxxxxx	tGGACAGGccaagccgctgtgca	ARID1A
bta-miR-200a	ENSBTAT00000039717	ENSBTAG00000001027	275	298	-12.82	cTTGTGACTAACTCCGTCCGACct	x|||||||xx||x|xx|x|x||xx	tAACACTGTCTG-GTAACGATGtt	SERPINH1
bta-miR-200a	ENSBTAT00000083385	ENSBTAG00000001027	275	298	-12.82	cTTGTGACTAACTCCGTCCGACct	x|||||||xx||x|xx|x|x||xx	tAACACTGTCTG-GTAACGATGtt	SERPINH1
bta-miR-671	ENSBTAT00000039717	ENSBTAG00000001027	113	135	-19.93	tCCTTCGGGGgacaaaagggtgg	x||||||||:xxxxxxxxxxxxx	aGGAAGCCCTggaggggctggag	SERPINH1
bta-miR-671	ENSBTAT00000083385	ENSBTAG00000001027	113	135	-19.93	tCCTTCGGGGgacaaaagggtgg	x||||||||:xxxxxxxxxxxxx	aGGAAGCCCTggaggggctggag	SERPINH1
bta-miR-2431-3p	ENSBTAT00000039717	ENSBTAG00000001027	96	116	-27.82	gTGGGGGTGGG-GT-CTGatagg	x||||||||::x||x|||xxxxx	cACCCCCACTTGCATGACcctga	SERPINH1
bta-miR-2431-3p	ENSBTAT00000083385	ENSBTAG00000001027	96	116	-27.82	gTGGGGGTGGG-GT-CTGatagg	x||||||||::x||x|||xxxxx	cACCCCCACTTGCATGACcctga	SERPINH1
bta-miR-99a-5p	ENSBTAT00000057477	ENSBTAG00000001030	3508	3528	-19.04	tTGGGCAT-TAGTAATGGAGaa	x|||||||x|||xxx|:||:xx	aACCCGTAGATCCG-ATCTTgt	MTMR3
bta-miR-106a	ENSBTAT00000057477	ENSBTAG00000001030	3580	3600	-15.21	tTTTCACGAA-GTAACtagttt	x|||||||||x||x||xxxxxx	aAAAGTGCTTACAGTGcaggta	MTMR3
bta-miR-10a	ENSBTAT00000057477	ENSBTAG00000001030	3388	3416	-17.86	gTGGGACAAAGTGAGTTACGTTTAAGact	x|||||||xxx|xxx:||x|:||||:xxx	tACCCTGT---A---GATCCGAATTTgtg	MTMR3
bta-miR-10b	ENSBTAT00000057477	ENSBTAG00000001030	3394	3416	-16.93	gTGGGACAAAGTGAGTTAcgttt	x|||||||xxx||xx|||xxxxx	tACCCTGTAGAACCGAATttgtg	MTMR3
bta-miR-342	ENSBTAT00000057477	ENSBTAG00000001030	481	510	-19.6	tGAGTGTGGACAAGAATTAGTGCGGTTcag	x|||||||xx|xxxxx||||:|x||x|xxx	tCTCACACA-GA----AATCGCACCCAtct	MTMR3
bta-miR-497	ENSBTAT00000057477	ENSBTAG00000001030	2891	2914	-20.89	cTCGTCGTGTCGTCGTCCCGACcc	x|||||||||x|x|:x||x:||xx	cAGCAGCACA-CTGT-GGTTTGta	MTMR3
bta-miR-99b	ENSBTAT00000057477	ENSBTAG00000001030	3507	3528	-19.22	tTGGGCATTAGTAATGGAGaac	x|||||||:xxxxx||||:xxx	cACCCGTAGAACCGACCTTgcg	MTMR3
bta-miR-100	ENSBTAT00000057477	ENSBTAG00000001030	3508	3528	-17.44	tTGGGCAT-TAGTAATGGAgaa	x|||||||x|||xxx||:|xxx	aACCCGTAGATCCGAACTTgtg	MTMR3
bta-miR-146b	ENSBTAT00000057477	ENSBTAG00000001030	125	149	-22.21	tCTCTTGACTGGTCGGTGTgtcact	x|||||||||x:xx|||:|xxxxxx	tGAGAACTGAATT-CCATAggctgt	MTMR3
bta-miR-182	ENSBTAT00000057477	ENSBTAG00000001030	911	933	-14.13	gAACCGTTTCTTCCCTC-GTGccc	x|||||||x|:xx|x|xx|||xxx	tTTGGCAATGGTAGAACTCACact	MTMR3
bta-miR-2370-5p	ENSBTAT00000057477	ENSBTAG00000001030	574	595	-20.33	aCCCTTTTACTTTTttggttca	x||||||||||||:xxxxxxxx	tGGGAAAATGAAAGttggttat	MTMR3
bta-miR-2431-3p	ENSBTAT00000057477	ENSBTAG00000001030	3188	3208	-29.31	gTGGGGGTGA-CG-AGTGGtgtt	x|||||||||x||x|x|||xxxx	cACCCCCACTTGCATGACCctga	MTMR3
bta-miR-574	ENSBTAT00000057477	ENSBTAG00000001030	886	911	-20.93	cCTCACACCCGCCCGGACCCACAatc	x|||||||x|:|x|xx||x||||xxx	tGAGTGTGTGTGTG--TGAGTGTgtg	MTMR3
bta-miR-6535	ENSBTAT00000057477	ENSBTAG00000001030	2784	2802	-22.85	tTCCCCCTC--CAGG-TCCTaa	x||||||||xx||:xx||||xx	tAGGGGGAGCGGTTGGAGGAct	MTMR3
bta-miR-10162-5p	ENSBTAT00000057477	ENSBTAG00000001030	222	244	-23.18	tCCTGTCCGTGACACTGACctga	x||||||||xxx|xx:|||xxxx	tGGACAGGCCAAGCCGCTGtgca	MTMR3
bta-miR-181b	ENSBTAT00000001376	ENSBTAG00000001035	982	1001	-16.42	tTGTAAGT--CTGCAA--ACCCta	x|||||||xx|x:||xxx||||xx	aACATTCATTGCTGTCGGTGGGtt	SF1
bta-miR-181c	ENSBTAT00000001376	ENSBTAG00000001035	977	1001	-12.63	tTGTAAGTCTGCAAACCCtaatttt	x|||||||x||x|x|x||xxxxxxx	aACATTCA-ACCTGTCGGtgagttt	SF1
bta-miR-191	ENSBTAT00000001376	ENSBTAG00000001035	917	937	-21.88	tTTGCCTTAGACTC--CGTCGag	x|||||||||xx|xxx|||||xx	cAACGGAATCCCAAAAGCAGCtg	SF1
bta-miR-200a	ENSBTAT00000001376	ENSBTAG00000001035	990	1012	-14.71	gTTGTGACGTCTTGTaagtctgc	x|||||||:xx:::|xxxxxxxx	tAACACTGTCTGGTAacgatgtt	SF1
bta-miR-2370-5p	ENSBTAT00000001376	ENSBTAG00000001035	730	751	-10.27	cCCCTTTTTCATAGAGTCGAac	x|||||||x|x|xx|::|:|xx	tGGGAAAATGAAAGTTGGTTat	SF1
bta-miR-192	ENSBTAT00000001374	ENSBTAG00000001036	102	125	-15.2	cACTGGATCTGTTAGTTTTCGtct	x|||||||x:x|||::|x|||xxx	cTGACCTATG-AATTGACAGCcag	HIBADH
bta-miR-503-3p	ENSBTAT00000001374	ENSBTAG00000001036	609	631	-11.67	aCTCATAACcctcaacaatgttc	x||||||||xxxxxxxxxxxxxx	gGAGTATTGtttctgctgcccgg	HIBADH
bta-miR-1291	ENSBTAT00000001379	ENSBTAG00000001038	116	141	-22.03	cCCGGGACATTCCCTTTGGTCTGTta	x|||||||x|xx|x|:|||x|x||xx	tGGCCCTG-ACTGAAGACCTG-CAgt	SNRPB
bta-miR-1296	ENSBTAT00000001379	ENSBTAG00000001038	153	174	-20.31	gATCCCGGAACCacccgcgtaa	x|||||||x|||xxxxxxxxxx	tTAGGGCCCTGGctccatctcc	SNRPB
bta-let-7d	ENSBTAT00000001384	ENSBTAG00000001042	1030	1051	-11.08	aCTCCATCCTTTttttttacaa	x|||||||x|::xxxxxxxxxx	aGAGGTAGTAGGttgcatagtt	MXD1
bta-let-7d	ENSBTAT00000071951	ENSBTAG00000001042	1030	1051	-11.08	aCTCCATCCTTTttttttacaa	x|||||||x|::xxxxxxxxxx	aGAGGTAGTAGGttgcatagtt	MXD1
bta-miR-200a	ENSBTAT00000001384	ENSBTAG00000001042	1263	1285	-13.63	aTTGTGACATGGTAggggaggac	x||||||||x:x:|xxxxxxxxx	tAACACTGTCTGGTaacgatgtt	MXD1
bta-miR-200a	ENSBTAT00000071951	ENSBTAG00000001042	1263	1285	-13.63	aTTGTGACATGGTAggggaggac	x||||||||x:x:|xxxxxxxxx	tAACACTGTCTGGTaacgatgtt	MXD1
bta-let-7g	ENSBTAT00000001384	ENSBTAG00000001042	1030	1051	-13.75	aCTCCATCCTTtttttttacaa	x|||||||x|:xxxxxxxxxxx	tGAGGTAGTAGtttgtacagtt	MXD1
bta-let-7g	ENSBTAT00000071951	ENSBTAG00000001042	1030	1051	-13.75	aCTCCATCCTTtttttttacaa	x|||||||x|:xxxxxxxxxxx	tGAGGTAGTAGtttgtacagtt	MXD1
bta-let-7a-5p	ENSBTAT00000001384	ENSBTAG00000001042	1030	1051	-14.35	aCTCCATCCTTTttttttacaa	x|||||||x|::xxxxxxxxxx	tGAGGTAGTAGGttgtatagtt	MXD1
bta-let-7a-5p	ENSBTAT00000071951	ENSBTAG00000001042	1030	1051	-14.35	aCTCCATCCTTTttttttacaa	x|||||||x|::xxxxxxxxxx	tGAGGTAGTAGGttgtatagtt	MXD1
bta-let-7b	ENSBTAT00000001384	ENSBTAG00000001042	1030	1051	-17.27	aCTCCATCCTTTttttttacaa	x|||||||x|::xxxxxxxxxx	tGAGGTAGTAGGttgtgtggtt	MXD1
bta-let-7b	ENSBTAT00000071951	ENSBTAG00000001042	1030	1051	-17.27	aCTCCATCCTTTttttttacaa	x|||||||x|::xxxxxxxxxx	tGAGGTAGTAGGttgtgtggtt	MXD1
bta-let-7e	ENSBTAT00000001384	ENSBTAG00000001042	1031	1051	-20.3	aCTCCATCCTTTttttttaca	x|||||||||::xxxxxxxxx	tGAGGTAGGAGGttgtatagt	MXD1
bta-let-7e	ENSBTAT00000071951	ENSBTAG00000001042	1031	1051	-20.3	aCTCCATCCTTTttttttaca	x|||||||||::xxxxxxxxx	tGAGGTAGGAGGttgtatagt	MXD1
bta-miR-497	ENSBTAT00000001384	ENSBTAG00000001042	344	365	-16.97	tTCGTCGTAAGACGGTGGGgtc	x|||||||xx|||:x::::xxx	cAGCAGCACACTGTGGTTTgta	MXD1
bta-miR-497	ENSBTAT00000071951	ENSBTAG00000001042	344	365	-16.97	tTCGTCGTAAGACGGTGGGgtc	x|||||||xx|||:x::::xxx	cAGCAGCACACTGTGGTTTgta	MXD1
bta-miR-671	ENSBTAT00000001384	ENSBTAG00000001042	81	107	-26.28	gCCTTCGGCTGCACGCTCCCCTAACac	x|||||||xx|x||x||||||x|x|xx	aGGAAGCC--C-TG-GAGGGGCTGGag	MXD1
bta-miR-671	ENSBTAT00000071951	ENSBTAG00000001042	81	107	-26.28	gCCTTCGGCTGCACGCTCCCCTAACac	x|||||||xx|x||x||||||x|x|xx	aGGAAGCC--C-TG-GAGGGGCTGGag	MXD1
bta-miR-2370-5p	ENSBTAT00000001384	ENSBTAG00000001042	1099	1120	-11.36	cCCCTTTTTTTTTTtttttctc	x|||||||x:|||:xxxxxxxx	tGGGAAAATGAAAGttggttat	MXD1
bta-miR-2370-5p	ENSBTAT00000071951	ENSBTAG00000001042	1099	1120	-11.36	cCCCTTTTTTTTTTtttttctc	x|||||||x:|||:xxxxxxxx	tGGGAAAATGAAAGttggttat	MXD1
bta-miR-2408	ENSBTAT00000001384	ENSBTAG00000001042	794	814	-15.96	aTGCACACACagacacacaca	x|||||||||xxxxxxxxxxx	cACGTGTGTGagctcagccgg	MXD1
bta-miR-2408	ENSBTAT00000071951	ENSBTAG00000001042	794	814	-15.96	aTGCACACACagacacacaca	x|||||||||xxxxxxxxxxx	cACGTGTGTGagctcagccgg	MXD1
bta-miR-6535	ENSBTAT00000001384	ENSBTAG00000001042	519	541	-24.85	cTCCCCCTTGACGGCTCTACaca	x|||||||:|x|::|x||x|xxx	tAGGGGGAGCGGTTG-GAGGact	MXD1
bta-miR-6535	ENSBTAT00000071951	ENSBTAG00000001042	519	541	-24.85	cTCCCCCTTGACGGCTCTACaca	x|||||||:|x|::|x||x|xxx	tAGGGGGAGCGGTTG-GAGGact	MXD1
bta-miR-2285k	ENSBTAT00000001386	ENSBTAG00000001044	238	258	-12.74	tTTTGGCCATcgaatcggtat	x|||||||x|xxxxxxxxxxx	aAAACCGGAAtgaactttttg	SUPV3L1
bta-miR-106a	ENSBTAT00000001393	ENSBTAG00000001050	571	594	-18.08	aTTTCACGGACGGTGCACGACaga	x|||||||:|x|x|x||||x|xxx	aAAAGTGCTTAC-A-GTGCAGgta	LDLRAP1
bta-miR-342	ENSBTAT00000001393	ENSBTAG00000001050	281	306	-14.3	cGAGTGTGTTCTCTCCCGcccttcga	x||||||||x||x|xx||xxxxxxxx	tCTCACACA-GAAATCGCacccatct	LDLRAP1
bta-miR-497	ENSBTAT00000001393	ENSBTAG00000001050	801	822	-22.35	gTCGTCGTGTACCTCCcccttc	x|||||||||xx|x||xxxxxx	cAGCAGCACACTGTGGtttgta	LDLRAP1
bta-miR-6535	ENSBTAT00000001393	ENSBTAG00000001050	789	810	-24.08	cTCCCCCTTCCCGTCCcacccc	x|||||||:x||:x||xxxxxx	tAGGGGGAGCGGTTGGaggact	LDLRAP1
bta-miR-2431-3p	ENSBTAT00000032051	ENSBTAG00000001055	447	468	-23.74	gTGGGGGTTCG-GTGTCGAGAcc	x|||||||xx:x||::x|x||xx	cACCCCCACTTGCATGACCCTga	HNRNPL
bta-miR-182	ENSBTAT00000053995	ENSBTAG00000001057	622	645	-19.95	gAACCGTTGC-GTCTTCGAacccga	x|||||||:|x:||||x||xxxxxx	tTTGGCAATGGTAGAA-CTcacact	ARFGAP3
bta-miR-2285bf	ENSBTAT00000053995	ENSBTAG00000001057	5	28	-13.22	cTTTGTGCGTGGCTTTTGTAGtca	x|||||||x||xxx||||x|:xxx	aAAACACGAAC---AAACTTTttg	ARFGAP3
bta-miR-200a	ENSBTAT00000078109	ENSBTAG00000001061	864	890	-19.23	gTTGTGACACTCATCACCGTACTACcg	x||||||||xxx|:||xx|xx||||xx	tAACACTGTC--TGGTAAC--GATGtt	PRKCA
bta-miR-342	ENSBTAT00000078109	ENSBTAG00000001061	794	819	-25.73	aGAGTGTGTGTGTGTGTGTGTGTGtg	x||||||||x|x|:x|:|||x||:xx	tCTCACACAGAAAT-CGCACCCATct	PRKCA
bta-miR-143	ENSBTAT00000078109	ENSBTAG00000001061	145	166	-25.38	aCTCTACTGCGTCGGC-TCGtgc	x|||||||x|||x|:|x|||xxx	tGAGATGAAGCA-CTGTAGCtcg	PRKCA
bta-miR-183	ENSBTAT00000078109	ENSBTAG00000001061	836	862	-17.68	cTACCGTGGGACCTGGTCTCAGtagag	x|||||||xx|||xx:|||x|:xxxxx	tATGGCAC--TGG--TAGAATTcactg	PRKCA
bta-miR-2431-3p	ENSBTAT00000078109	ENSBTAG00000001061	399	423	-17.27	cTGGGGGTAAGAAAATAaggcttct	x|||||||xx|||xx||xxxxxxxx	cACCCCCA--CTTGCATgaccctga	PRKCA
bta-let-7d	ENSBTAT00000001420	ENSBTAG00000001069	403	427	-18.95	aCTCCATCCATACTAATAGTcaaaa	x|||||||x||x|:||:x||xxxxx	aGAGGTAG-TA-GGTTG-CAtagtt	TP53
bta-let-7g	ENSBTAT00000001420	ENSBTAG00000001069	405	427	-20.54	aCTCCATCCATACTAATA-GTCaa	x|||||||x||x|x||:|x|||xx	tGAGGTAG-TA-GTTTGTACAGtt	TP53
bta-let-7a-5p	ENSBTAT00000001420	ENSBTAG00000001069	405	427	-22.04	aCTCCATCCATACTAATA-GTCaa	x|||||||x||x|:||:|x:||xx	tGAGGTAG-TA-GGTTGTATAGtt	TP53
bta-let-7b	ENSBTAT00000001420	ENSBTAG00000001069	404	427	-19.8	aCTCCATCCATACTAATAgtcaaa	x|||||||x||x|:||:|xxxxxx	tGAGGTAG-TA-GGTTGTgtggtt	TP53
bta-let-7e	ENSBTAT00000001420	ENSBTAG00000001069	405	427	-24.32	aCTCCATCCATACTAATAgtcaa	x||||||||x|x|:||:|xxxxx	tGAGGTAGG-A-GGTTGTatagt	TP53
bta-miR-671	ENSBTAT00000001420	ENSBTAG00000001069	676	698	-27.88	aCCTTCGGTGACC-CTAGGTCCta	x|||||||x||||x|:xx|x||xx	aGGAAGCC-CTGGAGGGGCTGGag	TP53
bta-miR-6119-3p	ENSBTAT00000001420	ENSBTAG00000001069	537	559	-13.39	aGTTTAGTAGGtgggtccccctg	x||||||||::xxxxxxxxxxxx	gCAAATCATTTtttactctccaa	TP53
bta-miR-6535	ENSBTAT00000001420	ENSBTAG00000001069	524	545	-22.5	gTCCCCCTgtttcttggtcgtg	x|||||||xxxxxxxxxxxxxx	tAGGGGGAgcggttggaggact	TP53
bta-miR-183	ENSBTAT00000001421	ENSBTAG00000001071	201	220	-19.35	tTACCGTG--CTTCG-GGGTGgg	x|||||||xx|x||xx::|||xx	tATGGCACTGGTAGAATTCACtg	WRAP53
bta-miR-183	ENSBTAT00000071579	ENSBTAG00000001071	201	220	-19.35	tTACCGTG--CTTCG-GGGTGgg	x|||||||xx|x||xx::|||xx	tATGGCACTGGTAGAATTCACtg	WRAP53
bta-miR-183	ENSBTAT00000073350	ENSBTAG00000001071	201	220	-19.35	tTACCGTG--CTTCG-GGGTGgg	x|||||||xx|x||xx::|||xx	tATGGCACTGGTAGAATTCACtg	WRAP53
bta-miR-106a	ENSBTAT00000044244	ENSBTAG00000001077	70	89	-17.04	aTTTCACGA-TC-CACGgaccc	x||||||||x|xx||||xxxxx	aAAAGTGCTTACAGTGCaggta	OSBPL5
bta-miR-106a	ENSBTAT00000073265	ENSBTAG00000001077	70	89	-17.04	aTTTCACGA-TC-CACGgaccc	x||||||||x|xx||||xxxxx	aAAAGTGCTTACAGTGCaggta	OSBPL5
bta-miR-671	ENSBTAT00000044244	ENSBTAG00000001077	524	546	-26.02	tCCTTCGGGGTAGCGTCGGgtcg	x||||||||::xx|x:||:xxxx	aGGAAGCCCTGGAGGGGCTggag	OSBPL5
bta-miR-671	ENSBTAT00000073265	ENSBTAG00000001077	524	546	-26.02	tCCTTCGGGGTAGCGTCGGgtcg	x||||||||::xx|x:||:xxxx	aGGAAGCCCTGGAGGGGCTggag	OSBPL5
bta-miR-1291	ENSBTAT00000044244	ENSBTAG00000001077	207	231	-22.74	cCCGGGACACCCTTTCCGGTCGcgg	x|||||||xxx|||x|x||x||xxx	tGGCCCTGACTGAA-GACCTGCagt	OSBPL5
bta-miR-1291	ENSBTAT00000073265	ENSBTAG00000001077	207	231	-22.74	cCCGGGACACCCTTTCCGGTCGcgg	x|||||||xxx|||x|x||x||xxx	tGGCCCTGACTGAA-GACCTGCagt	OSBPL5
bta-miR-2408	ENSBTAT00000044244	ENSBTAG00000001077	719	739	-18.19	tTGCACACACTTcccttctag	x||||||||||:xxxxxxxxx	cACGTGTGTGAGctcagccgg	OSBPL5
bta-miR-2408	ENSBTAT00000073265	ENSBTAG00000001077	719	739	-18.19	tTGCACACACTTcccttctag	x||||||||||:xxxxxxxxx	cACGTGTGTGAGctcagccgg	OSBPL5
bta-miR-192	ENSBTAT00000072269	ENSBTAG00000001081	425	445	-19.59	gACTGGAT-CA-GACAGTTGagt	x|||||||x|xx:||x||:|xxx	cTGACCTATGAATTGACAGCcag	PALLD
bta-miR-192	ENSBTAT00000073285	ENSBTAG00000001081	425	445	-19.59	gACTGGAT-CA-GACAGTTGagt	x|||||||x|xx:||x||:|xxx	cTGACCTATGAATTGACAGCcag	PALLD
bta-miR-192	ENSBTAT00000081479	ENSBTAG00000001081	425	445	-19.59	gACTGGAT-CA-GACAGTTGagt	x|||||||x|xx:||x||:|xxx	cTGACCTATGAATTGACAGCcag	PALLD
bta-miR-342	ENSBTAT00000072269	ENSBTAG00000001081	2545	2569	-16.37	cGAGTGTGACCCGTGCGTctcgaac	x|||||||x|xxxx||||xxxxxxx	tCTCACACAGAAATCGCAcccatct	PALLD
bta-miR-342	ENSBTAT00000073285	ENSBTAG00000001081	2545	2569	-16.37	cGAGTGTGACCCGTGCGTctcgaac	x|||||||x|xxxx||||xxxxxxx	tCTCACACAGAAATCGCAcccatct	PALLD
bta-miR-342	ENSBTAT00000081479	ENSBTAG00000001081	2545	2569	-16.37	cGAGTGTGACCCGTGCGTctcgaac	x|||||||x|xxxx||||xxxxxxx	tCTCACACAGAAATCGCAcccatct	PALLD
bta-miR-182	ENSBTAT00000072269	ENSBTAG00000001081	2640	2665	-14.79	aAACCGTTCATACTCTTCTGTAGTca	x|||||||xx:|x||||xx||x||xx	tTTGGCAATGGT-AGAACTCA-CAct	PALLD
bta-miR-182	ENSBTAT00000073285	ENSBTAG00000001081	2640	2665	-14.79	aAACCGTTCATACTCTTCTGTAGTca	x|||||||xx:|x||||xx||x||xx	tTTGGCAATGGT-AGAACTCA-CAct	PALLD
bta-miR-182	ENSBTAT00000081479	ENSBTAG00000001081	2640	2665	-14.79	aAACCGTTCATACTCTTCTGTAGTca	x|||||||xx:|x||||xx||x||xx	tTTGGCAATGGT-AGAACTCA-CAct	PALLD
bta-miR-671	ENSBTAT00000072269	ENSBTAG00000001081	1861	1882	-25.84	cCCTTCGG-ACCggaggtgaccg	x|||||||x|||xxxxxxxxxxx	aGGAAGCCCTGGaggggctggag	PALLD
bta-miR-671	ENSBTAT00000073285	ENSBTAG00000001081	1861	1882	-25.84	cCCTTCGG-ACCggaggtgaccg	x|||||||x|||xxxxxxxxxxx	aGGAAGCCCTGGaggggctggag	PALLD
bta-miR-671	ENSBTAT00000081479	ENSBTAG00000001081	1861	1882	-25.84	cCCTTCGG-ACCggaggtgaccg	x|||||||x|||xxxxxxxxxxx	aGGAAGCCCTGGaggggctggag	PALLD
bta-miR-1291	ENSBTAT00000072269	ENSBTAG00000001081	1012	1037	-20.46	tCCGGGACCAGCCTTTCGCGCCGTat	x|||||||xx|x|||:x|x|x|||xx	tGGCCCTGA-CTGAAGAC-CTGCAgt	PALLD
bta-miR-1291	ENSBTAT00000073285	ENSBTAG00000001081	1012	1037	-20.46	tCCGGGACCAGCCTTTCGCGCCGTat	x|||||||xx|x|||:x|x|x|||xx	tGGCCCTGA-CTGAAGAC-CTGCAgt	PALLD
bta-miR-1291	ENSBTAT00000081479	ENSBTAG00000001081	1012	1037	-20.46	tCCGGGACCAGCCTTTCGCGCCGTat	x|||||||xx|x|||:x|x|x|||xx	tGGCCCTGA-CTGAAGAC-CTGCAgt	PALLD
bta-miR-2370-5p	ENSBTAT00000072269	ENSBTAG00000001081	2648	2673	-16.5	gCCCTTTTAAACCGTTCATACTcttc	x||||||||xxx|x||||x||:xxxx	tGGGAAAAT---GAAAGT-TGGttat	PALLD
bta-miR-2370-5p	ENSBTAT00000073285	ENSBTAG00000001081	2648	2673	-16.5	gCCCTTTTAAACCGTTCATACTcttc	x||||||||xxx|x||||x||:xxxx	tGGGAAAAT---GAAAGT-TGGttat	PALLD
bta-miR-2370-5p	ENSBTAT00000081479	ENSBTAG00000001081	2648	2673	-16.5	gCCCTTTTAAACCGTTCATACTcttc	x||||||||xxx|x||||x||:xxxx	tGGGAAAAT---GAAAGT-TGGttat	PALLD
bta-miR-574	ENSBTAT00000072269	ENSBTAG00000001081	1283	1310	-26.37	aCTCACACTTAAGACACGTTCCGCAagc	x|||||||xxx|x||||::||x:||xxx	tGAGTGTG---TGTGTGTGAG-TGTgtg	PALLD
bta-miR-574	ENSBTAT00000073285	ENSBTAG00000001081	1283	1310	-26.37	aCTCACACTTAAGACACGTTCCGCAagc	x|||||||xxx|x||||::||x:||xxx	tGAGTGTG---TGTGTGTGAG-TGTgtg	PALLD
bta-miR-574	ENSBTAT00000081479	ENSBTAG00000001081	1283	1310	-26.37	aCTCACACTTAAGACACGTTCCGCAagc	x|||||||xxx|x||||::||x:||xxx	tGAGTGTG---TGTGTGTGAG-TGTgtg	PALLD
bta-miR-342	ENSBTAT00000071371	ENSBTAG00000001083	743	767	-17.22	tGAGTGTGACagaccttcataggga	x|||||||x|xxxxxxxxxxxxxxx	tCTCACACAGaaatcgcacccatct	MAP3K20
bta-miR-183	ENSBTAT00000071371	ENSBTAG00000001083	760	784	-24.87	aTACCGTGGTATCATTGTGAGTGtg	x|||||||xx|:|||:x|:||||xx	tATGGCAC--TGGTAGAATTCACtg	MAP3K20
bta-miR-92b	ENSBTAT00000038527	ENSBTAG00000001083	400	421	-11.42	aTAACGTGATCttataataatt	x||||||||x|xxxxxxxxxxx	tATTGCACTCGtcccggcctcc	MAP3K20
bta-miR-92b	ENSBTAT00000079654	ENSBTAG00000001083	400	421	-11.42	aTAACGTGATCttataataatt	x||||||||x|xxxxxxxxxxx	tATTGCACTCGtcccggcctcc	MAP3K20
bta-miR-92b	ENSBTAT00000084354	ENSBTAG00000001083	400	421	-11.42	aTAACGTGATCttataataatt	x||||||||x|xxxxxxxxxxx	tATTGCACTCGtcccggcctcc	MAP3K20
bta-miR-1291	ENSBTAT00000038527	ENSBTAG00000001083	281	303	-20.54	tCCGGGAC-GATTAGTGttttcgt	x|||||||x||:|xx||xxxxxxx	tGGCCCTGACTGAAGACctgcagt	MAP3K20
bta-miR-1291	ENSBTAT00000079654	ENSBTAG00000001083	281	303	-20.54	tCCGGGAC-GATTAGTGttttcgt	x|||||||x||:|xx||xxxxxxx	tGGCCCTGACTGAAGACctgcagt	MAP3K20
bta-miR-1291	ENSBTAT00000084354	ENSBTAG00000001083	281	303	-20.54	tCCGGGAC-GATTAGTGttttcgt	x|||||||x||:|xx||xxxxxxx	tGGCCCTGACTGAAGACctgcagt	MAP3K20
bta-miR-2370-5p	ENSBTAT00000071371	ENSBTAG00000001083	425	444	-10.59	tCCCTTTT--TTTACATCAtac	x|||||||xx|||xx|:||xxx	tGGGAAAATGAAAGTTGGTtat	MAP3K20
bta-miR-1468	ENSBTAT00000071371	ENSBTAG00000001083	10	31	-18.06	aAGGCAAAGTAATGAAACGAaa	x|||||||xxx|::||||||xx	cTCCGTTTGCCTGTTTTGCTga	MAP3K20
bta-miR-574	ENSBTAT00000001440	ENSBTAG00000001086	163	186	-12.44	tCTCACACCTAatttcctgaattt	x|||||||x:|xxxxxxxxxxxxx	tGAGTGTGTGTgtgtgagtgtgtg	FHL2
bta-miR-148a	ENSBTAT00000001463	ENSBTAG00000001105	886	907	-12.34	tGTCACGTtcacatttagttgt	x|||||||xxxxxxxxxxxxxx	tCAGTGCActacagaactttgt	ANXA4
bta-miR-181b	ENSBTAT00000001463	ENSBTAG00000001105	745	766	-16.17	gTGTAAGTA--GAAGTTCGACCga	x||||||||xx||x:x:|:x||xx	aACATTCATTGCTGTCGGTGGGtt	ANXA4
bta-miR-181c	ENSBTAT00000001463	ENSBTAG00000001105	743	766	-11.79	gTGTAAGTAGAAGTTCGACcgaat	x|||||||x|x|xxx|x||xxxxx	aACATTCAACCTGTCGGTGagttt	ANXA4
bta-miR-152	ENSBTAT00000001463	ENSBTAG00000001105	886	907	-11.59	tGTCACGTTCACATTTagttgt	x|||||||x|xxx:||xxxxxx	tCAGTGCATGACAGAActtggg	ANXA4
bta-miR-6119-3p	ENSBTAT00000001463	ENSBTAG00000001105	390	413	-16.11	aGTTTAGTTCTTTAATGATCGGtg	x|||||||xxxxx|||||xx||xx	gCAAATCATTTT-TTACTCTCCaa	ANXA4
bta-miR-31	ENSBTAT00000001464	ENSBTAG00000001107	261	281	-16.42	tCCGTTCTAAGcgaaaaaatg	x||||||||x|xxxxxxxxxx	aGGCAAGATGCtggcatagct	CACYBP
bta-miR-320a	ENSBTAT00000001466	ENSBTAG00000001108	35	56	-16	aTTTCGACCGTTTTTTCaaaag	x||||||||xxx:|:||xxxxx	aAAAGCTGGGTTGAGAGggcga	GMCL1
bta-miR-106a	ENSBTAT00000001466	ENSBTAG00000001108	15	35	-12.85	gTTTCACGA-TGACAaaggttg	x||||||||x||x||xxxxxxx	aAAAGTGCTTACAGTgcaggta	GMCL1
bta-miR-192	ENSBTAT00000001466	ENSBTAG00000001108	745	767	-10.48	cACTGGATTATTATTTcaacatg	x|||||||xx|||x:|xxxxxxx	cTGACCTATGAATTGAcagccag	GMCL1
bta-miR-144	ENSBTAT00000001474	ENSBTAG00000001114	127	146	-13.97	aTGTCATAGCCAC-A-GTGAct	x|||||||x|x||x|x:|||xx	tACAGTATAGATGATGTACTag	PRKD3
bta-miR-144	ENSBTAT00000070039	ENSBTAG00000001114	127	146	-13.97	aTGTCATAGCCAC-A-GTGAct	x|||||||x|x||x|x:|||xx	tACAGTATAGATGATGTACTag	PRKD3
bta-miR-30e-5p	ENSBTAT00000001477	ENSBTAG00000001116	300	323	-11.17	aCATTTGTtccttagtcttgaaac	x|||||||xxxxxxxxxxxxxxxx	tGTAAACAtccttgactggaagct	P4HA2
bta-miR-30e-5p	ENSBTAT00000064203	ENSBTAG00000001116	300	323	-11.17	aCATTTGTtccttagtcttgaaac	x|||||||xxxxxxxxxxxxxxxx	tGTAAACAtccttgactggaagct	P4HA2
bta-miR-30a-5p	ENSBTAT00000001477	ENSBTAG00000001116	300	323	-11.14	aCATTTGTtccttagtcttgaaac	x|||||||xxxxxxxxxxxxxxxx	tGTAAACAtcctcgactggaagct	P4HA2
bta-miR-30a-5p	ENSBTAT00000064203	ENSBTAG00000001116	300	323	-11.14	aCATTTGTtccttagtcttgaaac	x|||||||xxxxxxxxxxxxxxxx	tGTAAACAtcctcgactggaagct	P4HA2
bta-miR-342	ENSBTAT00000001477	ENSBTAG00000001116	264	286	-18.11	aGAGTGTGGATTT--CGTAGactcc	x|||||||xx|||xx|||x|xxxxx	tCTCACACAGAAATCGCACCcatct	P4HA2
bta-miR-342	ENSBTAT00000064203	ENSBTAG00000001116	264	286	-18.11	aGAGTGTGGATTT--CGTAGactcc	x|||||||xx|||xx|||x|xxxxx	tCTCACACAGAAATCGCACCcatct	P4HA2
bta-miR-30f	ENSBTAT00000001477	ENSBTAG00000001116	300	323	-10.17	aCATTTGTtccttagtcttgaaac	x|||||||xxxxxxxxxxxxxxxx	tGTAAACAccctacactctcagct	P4HA2
bta-miR-30f	ENSBTAT00000064203	ENSBTAG00000001116	300	323	-10.17	aCATTTGTtccttagtcttgaaac	x|||||||xxxxxxxxxxxxxxxx	tGTAAACAccctacactctcagct	P4HA2
bta-miR-106a	ENSBTAT00000067076	ENSBTAG00000001117	227	248	-19.48	tTTTCACGAATGagaacccatc	x|||||||||||xxxxxxxxxx	aAAAGTGCTTACagtgcaggta	ANKRD50
bta-miR-200a	ENSBTAT00000067076	ENSBTAG00000001117	356	378	-16.04	cTTGTGACGGAAAAGTatatata	x|||||||:||xx|x|xxxxxxx	tAACACTGTCTGGTAAcgatgtt	ANKRD50
bta-miR-144	ENSBTAT00000067076	ENSBTAG00000001117	122	147	-15.19	cTGTCATAAATTCCATTGACATGAcg	x|||||||xxx||x|:|x||||||xx	tACAGTAT---AGATGA-TGTACTag	ANKRD50
bta-miR-183	ENSBTAT00000067076	ENSBTAG00000001117	328	350	-17.46	gTACCGTGTACGTGTGAAtagtt	x|||||||xx|:|x|x||xxxxx	tATGGCACTGGTAGAATTcactg	ANKRD50
bta-miR-320a	ENSBTAT00000069488	ENSBTAG00000001126	2753	2772	-16.01	aTTTCGAC--AATCCTGTCttt	x|||||||xx||:x||x:|xxx	aAAAGCTGGGTTGAGAGGGcga	BMP2K
bta-miR-10a	ENSBTAT00000069488	ENSBTAG00000001126	163	187	-17.58	aTGGGACACGTCTATGAAGGAAaaa	x|||||||xx||||x|xxx:||xxx	tACCCTGT--AGATCCGAATTTgtg	BMP2K
bta-miR-30e-5p	ENSBTAT00000069488	ENSBTAG00000001126	5084	5107	-20.89	tCATTTGTCGAGATTGACTTcgta	x|||||||x|x:|:||||:|xxxx	tGTAAACATCCTTGACTGGAagct	BMP2K
bta-miR-192	ENSBTAT00000069488	ENSBTAG00000001126	2442	2464	-19.93	cACTGGATGTCAGATTGTCatca	x|||||||::xx:|:||||xxxx	cTGACCTATGAATTGACAGccag	BMP2K
bta-miR-200a	ENSBTAT00000069488	ENSBTAG00000001126	973	994	-17.37	gTTGTGAC-GACGAGTGGTctgt	x|||||||x|||x|x||x|xxxx	tAACACTGTCTGGTAACGAtgtt	BMP2K
bta-miR-10b	ENSBTAT00000069488	ENSBTAG00000001126	162	187	-15.24	aTGGGACACGTCTATGAAGGAAAaag	x|||||||xx|||x||xxxx|||xxx	tACCCTGT--AGA-ACCGAATTTgtg	BMP2K
bta-miR-30a-5p	ENSBTAT00000069488	ENSBTAG00000001126	5084	5107	-20.29	tCATTTGTCGAGATTGACTTcgta	x|||||||x|x:x:||||:|xxxx	tGTAAACATCCTCGACTGGAagct	BMP2K
bta-miR-342	ENSBTAT00000069488	ENSBTAG00000001126	2501	2525	-13.69	aGAGTGTGcagaaccctcgaaataa	x|||||||xxxxxxxxxxxxxxxxx	tCTCACACagaaatcgcacccatct	BMP2K
bta-miR-183	ENSBTAT00000069488	ENSBTAG00000001126	594	616	-14.03	tTACCGTGAACAaaaaaaaatta	x||||||||x||xxxxxxxxxxx	tATGGCACTGGTagaattcactg	BMP2K
bta-miR-30f	ENSBTAT00000069488	ENSBTAG00000001126	5084	5107	-12.99	tCATTTGTCGAGAT-TGActtcgta	x|||||||x|x|||x|||xxxxxxx	tGTAAACACC-CTACACTctcagct	BMP2K
bta-miR-2303	ENSBTAT00000069488	ENSBTAG00000001126	708	728	-10.67	tGACTTACAAAAAAGGAgagg	x|||||||x|x|xxx||xxxx	tCTGAATGATGTCGACTgatg	BMP2K
bta-miR-2370-5p	ENSBTAT00000069488	ENSBTAG00000001126	4081	4103	-14.55	tCCCTTTTTTTCGTTGACTAcga	x|||||||x:|xx|::||:|xxx	tGGGAAAATGAA-AGTTGGTtat	BMP2K
bta-miR-92b	ENSBTAT00000001508	ENSBTAG00000001133	83	105	-14.53	gTAACGTGCGTCTGTGACctatc	x|||||||x|x|x|x|x|xxxxx	tATTGCACTC-GTCCCGGcctcc	VWA8
bta-miR-92b	ENSBTAT00000063788	ENSBTAG00000001133	83	105	-14.53	gTAACGTGCGTCTGTGACctatc	x|||||||x|x|x|x|x|xxxxx	tATTGCACTC-GTCCCGGcctcc	VWA8
bta-miR-148a	ENSBTAT00000001510	ENSBTAG00000001134	1001	1022	-12.75	cGTCACGTccgccgggacctcc	x|||||||xxxxxxxxxxxxxx	tCAGTGCActacagaactttgt	SRRT
bta-miR-31	ENSBTAT00000001510	ENSBTAG00000001134	645	665	-23.37	aCCGTTCTCCATTCGTGTCgg	x|||||||x|xx:|||:||xx	aGGCAAGATGCTGGCATAGct	SRRT
bta-miR-181b	ENSBTAT00000001510	ENSBTAG00000001134	509	533	-12.66	aTGTAAGTAGGTGGGAGTagagttt	x||||||||:x:|:x||:xxxxxxx	aACATTCATT-GCTGTCGgtgggtt	SRRT
bta-miR-181c	ENSBTAT00000001510	ENSBTAG00000001134	510	533	-12.86	aTGTAAGTAGGtgggagtagagtt	x|||||||x||xxxxxxxxxxxxx	aACATTCAACCtgtcggtgagttt	SRRT
bta-miR-152	ENSBTAT00000001510	ENSBTAG00000001134	1002	1022	-19.99	cGTCACGTCC-GCCGGGACCtc	x|||||||x|x|x|xx||x|xx	tCAGTGCATGACAGAACTTGgg	SRRT
bta-miR-769	ENSBTAT00000001510	ENSBTAG00000001134	442	461	-15.08	aCTCTGGAAAC--AACAGTTat	x|||||||xx|xx||x|x|:xx	tGAGACCTCCGGGTTCTGAGct	SRRT
bta-miR-1291	ENSBTAT00000001510	ENSBTAG00000001134	992	1012	-20.74	gCCGGGAC---CTCCTGTACccgc	x|||||||xxx||x|||x||xxxx	tGGCCCTGACTGAAGACCTGcagt	SRRT
bta-miR-1296	ENSBTAT00000001510	ENSBTAG00000001134	1492	1515	-20.59	cATCCCGGGCGGCCGctcatcctc	x||||||||xx:|||xxxxxxxxx	tTAGGGCCC--TGGCtccatctcc	SRRT
bta-miR-2431-3p	ENSBTAT00000001510	ENSBTAG00000001134	616	641	-26.38	cTGGGGGTGAGGAAGATGTTGGacac	x|||||||||xx|x|x|::|||xxxx	cACCCCCACT--TGC-ATGACCctga	SRRT
bta-miR-3613a	ENSBTAT00000001510	ENSBTAG00000001134	357	379	-12.02	aCAACATGATATATATATATAta	x||||||||x|x|x|x|x|:|xx	tGTTGTACTTTTTTTTT-TGTtc	SRRT
bta-miR-574	ENSBTAT00000001510	ENSBTAG00000001134	1629	1652	-22.61	cCTCACACGCGCTGACCCctcagc	x|||||||:|:|xx||x|xxxxxx	tGAGTGTGTGTGTGTGAGtgtgtg	SRRT
bta-miR-6119-5p	ENSBTAT00000001510	ENSBTAG00000001134	638	660	-18.55	tCTCCATTCGTGTCGGAAACTgg	x|||||||xx|xxxxx|||||xx	aGAGGTAAAAAATTGATTTGAct	SRRT
bta-miR-1949	ENSBTAT00000001507	ENSBTAG00000001134	11	32	-15.34	cTATGGTCCT-CACTCCTTTTca	x|||||||||x|xx||x|x|:xx	tATACCAGGATGCCAGCATAGtt	SRRT
bta-miR-1949	ENSBTAT00000001510	ENSBTAG00000001134	11	32	-15.34	cTATGGTCCT-CACTCCTTTTca	x|||||||||x|xx||x|x|:xx	tATACCAGGATGCCAGCATAGtt	SRRT
bta-miR-31	ENSBTAT00000001520	ENSBTAG00000001142	934	955	-22.57	tCCGTTCTTATGACCTCACCca	x|||||||x|:||||xx|x|xx	aGGCAAGA-TGCTGGCATAGct	GNE
bta-miR-191	ENSBTAT00000001520	ENSBTAG00000001142	2808	2832	-11.78	aTTGCCTTTGTTGGATTcacaggta	x|||||||x|xx||x||xxxxxxxx	cAACGGAATC--CCAAAagcagctg	GNE
bta-miR-200a	ENSBTAT00000001520	ENSBTAG00000001142	783	804	-16.67	tTTGTGACGGAA-ATAGTCATga	x|||||||:||xx||x|:x|:xx	tAACACTGTCTGGTAACGATGtt	GNE
bta-miR-182	ENSBTAT00000001520	ENSBTAG00000001142	1529	1555	-10.23	tAACCGTTTTAAAGGTATCGTATGTtc	x|||||||x:x|xxx|x|x|xx|||xx	tTTGGCAATGGT---AGAACTCACAct	GNE
bta-miR-2370-5p	ENSBTAT00000001520	ENSBTAG00000001142	132	153	-19.35	aCCCTTTTGACTGAAACCttct	x|||||||:xx|xx||||xxxx	tGGGAAAATGAAAGTTGGttat	GNE
bta-miR-148a	ENSBTAT00000001522	ENSBTAG00000001144	410	431	-12.72	tGTCACGTAAaataatatgtag	x|||||||x|xxxxxxxxxxxx	tCAGTGCACTacagaactttgt	NAA20
bta-miR-152	ENSBTAT00000001522	ENSBTAG00000001144	410	431	-13.01	tGTCACGTAaaataatatgtag	x||||||||xxxxxxxxxxxxx	tCAGTGCATgacagaacttggg	NAA20
bta-miR-6535	ENSBTAT00000001522	ENSBTAG00000001144	298	317	-29.36	aTCCCCCTC--TGACCTCGTta	x||||||||xx::|||||x|xx	tAGGGGGAGCGGTTGGAGGAct	NAA20
bta-miR-192	ENSBTAT00000001544	ENSBTAG00000001160	191	216	-21.26	tACTGGATGAGAGTTGAAGGTCttcc	x|||||||xxx|x||:|xx|||xxxx	cTGACCTA---TGAATTGACAGccag	GMEB1
bta-miR-200a	ENSBTAT00000001544	ENSBTAG00000001160	632	655	-15.47	aTTGTGACCGGAACGGAGTTttgc	x|||||||x:||x|:xx|:|xxxx	tAACACTG-TCTGGTAACGAtgtt	GMEB1
bta-miR-1291	ENSBTAT00000001544	ENSBTAG00000001160	934	955	-22.78	cCCGGGAC--GTTTTTTCCCGTca	x|||||||xx::||:|xxx|||xx	tGGCCCTGACTGAAGACCTGCAgt	GMEB1
bta-miR-31	ENSBTAT00000001545	ENSBTAG00000001161	497	517	-13.35	aCCGTTCTGGAATTATAaagt	x|||||||:xx|::x||xxxx	aGGCAAGATGCTGGCATagct	SINHCAF
bta-miR-106a	ENSBTAT00000001545	ENSBTAG00000001161	1792	1816	-17.38	gTTTCACGTACTGATGTATGTCatg	x|||||||x|x||x|x:|:|||xxx	aAAAGTGCTT-AC-A-GTGCAGgta	SINHCAF
bta-miR-497	ENSBTAT00000001545	ENSBTAG00000001161	230	254	-21.41	gTCGTCGTAAGTCGAAAGGATACtt	x|||||||xx||x||x|xx|x||xx	cAGCAGCA--CA-CTGTGGTTTGta	SINHCAF
bta-miR-143	ENSBTAT00000001545	ENSBTAG00000001161	1689	1712	-14.57	tCTCTACTAGGTATAATATCatat	x|||||||xx||xxx|:|||xxxx	tGAGATGAAGCAC--TGTAGctcg	SINHCAF
bta-miR-144	ENSBTAT00000001545	ENSBTAG00000001161	1847	1866	-15.22	tTGTCATATTT--TTCATGttt	x||||||||:|xx|x||||xxx	tACAGTATAGATGATGTACtag	SINHCAF
bta-miR-182	ENSBTAT00000001545	ENSBTAG00000001161	496	519	-11.12	gAACCGTTctggaattataaagtc	x|||||||xxxxxxxxxxxxxxxx	tTTGGCAAtggtagaactcacact	SINHCAF
bta-miR-6535	ENSBTAT00000001545	ENSBTAG00000001161	1747	1768	-24.83	tTCCCCCTTTCTtctgacacca	x|||||||:x|:xxxxxxxxxx	tAGGGGGAGCGGttggaggact	SINHCAF
bta-miR-146b	ENSBTAT00000001550	ENSBTAG00000001165	211	235	-22.71	cCTCTTGACACAGGGGTACCTacct	x||||||||xx|:||x||x|:xxxx	tGAGAACTGAATTCC-ATAGGctgt	AIFM2
bta-miR-146b	ENSBTAT00000072828	ENSBTAG00000001165	211	235	-22.71	cCTCTTGACACAGGGGTACCTacct	x||||||||xx|:||x||x|:xxxx	tGAGAACTGAATTCC-ATAGGctgt	AIFM2
bta-miR-2303	ENSBTAT00000067758	ENSBTAG00000001165	771	793	-16.89	gGACTTACAATCGGTCTAACgtt	x|||||||x|x|:|x||x||xxx	tCTGAATGAT-GTC-GACTGatg	AIFM2
bta-miR-2431-3p	ENSBTAT00000067758	ENSBTAG00000001165	514	535	-20.52	gTGGGGGTACAC-TACcctctcc	x|||||||xx||x|||xxxxxxx	cACCCCCACTTGCATGaccctga	AIFM2
bta-miR-31	ENSBTAT00000001552	ENSBTAG00000001168	504	526	-15.43	tCCGTTCTTCACTACGGTtacta	x|||||||xx||x||x||xxxxx	aGGCAAGA--TGCTGGCAtagct	BRAP
bta-miR-191	ENSBTAT00000001552	ENSBTAG00000001168	300	323	-24	gTTGCCTTTTTACG--TGTCGTCGca	x|||||||xxx|x|xx|x||||||xx	cAACGGAA---TCCCAAAAGCAGCtg	BRAP
bta-miR-200a	ENSBTAT00000001552	ENSBTAG00000001168	187	209	-18.69	tTTGTGACGGACAAagggagttg	x|||||||:|||x|xxxxxxxxx	tAACACTGTCTGGTaacgatgtt	BRAP
bta-miR-342	ENSBTAT00000032397	ENSBTAG00000001171	266	290	-20.31	gGAGTGTGTaaaaaattagtgactt	x||||||||xxxxxxxxxxxxxxxx	tCTCACACAgaaatcgcacccatct	OGFOD1
bta-miR-2303	ENSBTAT00000032397	ENSBTAG00000001171	222	242	-12.99	tGACTTACAATTTCTGTTTtg	x|||||||x|:xx|||x:|xx	tCTGAATGATGTCGACTGAtg	OGFOD1
bta-miR-6119-5p	ENSBTAT00000032397	ENSBTAG00000001171	177	199	-13	tCTCCATTCATGGATCGAGGTtc	x|||||||xx|x:|:x:|:x|xx	aGAGGTAAAAAATTGATTTGAct	OGFOD1
bta-miR-6535	ENSBTAT00000032397	ENSBTAG00000001171	440	459	-30.31	cTCCCCCTCGTC--CCTCaatg	x|||||||||:|xx||||xxxx	tAGGGGGAGCGGTTGGAGgact	OGFOD1
bta-let-7d	ENSBTAT00000001557	ENSBTAG00000001174	949	972	-19.11	aCTCCATCTATTTAACTGTTTTat	x|||||||x||::|||x||x|:xx	aGAGGTAG-TAGGTTG-CATAGtt	MRPL15
bta-miR-200a	ENSBTAT00000001557	ENSBTAG00000001174	482	509	-11.54	tTTGTGACGTTATGAATCTTTGATAagt	x|||||||:xxxx||x:|x|||x||xxx	tAACACTGT----CT-GGTAACGATgtt	MRPL15
bta-let-7g	ENSBTAT00000001557	ENSBTAG00000001174	951	972	-19.91	aCTCCATCTATTTAAC-TGTTtt	x|||||||x||:x|||x|||:xx	tGAGGTAG-TAGTTTGTACAGtt	MRPL15
bta-let-7a-5p	ENSBTAT00000001557	ENSBTAG00000001174	951	972	-21.5	aCTCCATCTATTTAAC-TGTTtt	x|||||||x||::|||x|:|:xx	tGAGGTAG-TAGGTTGTATAGtt	MRPL15
bta-let-7b	ENSBTAT00000001557	ENSBTAG00000001174	950	972	-20.21	aCTCCATCTATTTAACtgtttta	x|||||||x||::|||xxxxxxx	tGAGGTAG-TAGGTTGtgtggtt	MRPL15
bta-let-7e	ENSBTAT00000001557	ENSBTAG00000001174	952	972	-20.91	aCTCCATCTATTTAAC-TGTtt	x|||||||:x|::|||x|:|xx	tGAGGTAGG-AGGTTGTATAgt	MRPL15
bta-miR-2303	ENSBTAT00000001557	ENSBTAG00000001174	268	286	-15.54	gGACTTACC-CTTCT-ACTac	x|||||||xx|xx||x|||xx	tCTGAATGATGTCGACTGAtg	MRPL15
bta-miR-2431-3p	ENSBTAT00000001557	ENSBTAG00000001174	338	360	-19.15	cTGGGGGTGGCTCTCCTGttgtt	x||||||||:x:x|x|||xxxxx	cACCCCCACTTGCATGACcctga	MRPL15
bta-miR-1949	ENSBTAT00000001557	ENSBTAG00000001174	964	987	-13.34	aTATGGTCGTTATAGACtccatct	x|||||||x:||:x|x|xxxxxxx	tATACCAG-GATGCCAGcatagtt	MRPL15
bta-miR-30e-5p	ENSBTAT00000001565	ENSBTAG00000001181	1110	1134	-18.75	aCATTTGTGTCATACTGATGTCCtc	x|||||||:xx|x|||||:x|x|xx	tGTAAACATCCT-TGACTGGAAGct	RPS6KC1
bta-miR-30a-5p	ENSBTAT00000001565	ENSBTAG00000001181	1110	1134	-16.29	aCATTTGTGTCATACTGATGTCCtc	x|||||||:xx|xx||||:x|x|xx	tGTAAACATCCTC-GACTGGAAGct	RPS6KC1
bta-miR-143	ENSBTAT00000001565	ENSBTAG00000001181	948	969	-13.3	aCTCTACTCTAGGAAACCAAga	x|||||||x:xx||x|x|x|xx	tGAGATGAAGCACTGTAGCTcg	RPS6KC1
bta-miR-144	ENSBTAT00000001565	ENSBTAG00000001181	1108	1128	-12.27	gTGTCATA-CTGATGTcctcgc	x|||||||x||:x|::xxxxxx	tACAGTATAGATGATGtactag	RPS6KC1
bta-miR-146b	ENSBTAT00000001565	ENSBTAG00000001181	1	22	-11.86	tCTCTTGAGACGCAAGacaagt----	x|||||||xx|xx|||xxxxxxxxxx	tGAGAACT--GAATTCcataggctgt	RPS6KC1
bta-miR-30f	ENSBTAT00000001565	ENSBTAG00000001181	1111	1134	-16.2	aCATTTGTGTCATACTGAT-GTCct	x||||||||xx||xx|||xx|||xx	tGTAAACACCCTAC-ACTCTCAGct	RPS6KC1
bta-miR-574	ENSBTAT00000001565	ENSBTAG00000001181	67	87	-22.32	aCTCACACTC-CG-ACTCG-ACgg	x|||||||x|x|:x||||:x||xx	tGAGTGTGTGTGTGTGAGTGTGtg	RPS6KC1
bta-miR-30e-5p	ENSBTAT00000046363	ENSBTAG00000001182	308	333	-17.15	aCATTTGTTAGTTTGGTGGTCTTgta	x|||||||x||xxx:x||::|||xxx	tGTAAACA-TCCT-TGACTGGAAgct	SEPTIN7
bta-miR-200a	ENSBTAT00000046363	ENSBTAG00000001182	44	65	-13.88	tTTGTGACT-ACAGGTTCGACcg	x|||||||xx||x:x|x|x||xx	tAACACTGTCTGGTAACGATGtt	SEPTIN7
bta-miR-30a-5p	ENSBTAT00000046363	ENSBTAG00000001182	308	333	-18.52	aCATTTGTTAGTTTGGTGGTCTTgta	x|||||||x||xxx|x||::|||xxx	tGTAAACA-TCCT-CGACTGGAAgct	SEPTIN7
bta-miR-182	ENSBTAT00000046363	ENSBTAG00000001182	15	41	-13.42	tAACCGTTGATTATGCATTGAccacca	x|||||||x|::||x|x||||xxxxxx	tTTGGCAA-TGGTA-G-AACTcacact	SEPTIN7
bta-miR-30f	ENSBTAT00000046363	ENSBTAG00000001182	311	333	-15.67	aCATTTGTTAGTT-TGGTGGTCtt	x|||||||xx|x|x||:x:|||xx	tGTAAACACCCTACACTCTCAGct	SEPTIN7
bta-miR-2285k	ENSBTAT00000046363	ENSBTAG00000001182	78	98	-12.74	tTTTGGCCACGTTTAAccagt	x|||||||xx::||x|xxxxx	aAAACCGGAATGAACTttttg	SEPTIN7
bta-miR-1291	ENSBTAT00000001576	ENSBTAG00000001189	466	488	-33.62	tCCGGGACTCGCC-CGGGACGTca	x||||||||x:|xx|x||||||xx	tGGCCCTGACTGAAGACCTGCAgt	AP1B1
bta-miR-2285k	ENSBTAT00000001589	ENSBTAG00000001199	189	209	-11.26	aTTTGGCCACAATCAAAGtcc	x|||||||xx|x|xx||:xxx	aAAACCGGAATGAACTTTttg	DAP3
bta-miR-182	ENSBTAT00000001597	ENSBTAG00000001207	54	75	-14.11	aAACCGTTGGC--CTTAAacctca	x|||||||:x|xx|||x|xxxxxx	tTTGGCAATGGTAGAACTcacact	SERPINB8
bta-miR-10162-5p	ENSBTAT00000047947	ENSBTAG00000001212	97	123	-19.2	tCCTGTCCTAGGTCCTCTTCTACcggt	x|||||||xx|||xx||xx|x||xxxx	tGGACAGG--CCA--AGCCGCTGtgca	SSR2
bta-miR-10162-5p	ENSBTAT00000073018	ENSBTAG00000001212	97	123	-19.2	tCCTGTCCTAGGTCCTCTTCTACcggt	x|||||||xx|||xx||xx|x||xxxx	tGGACAGG--CCA--AGCCGCTGtgca	SSR2
bta-miR-2370-5p	ENSBTAT00000001619	ENSBTAG00000001225	608	629	-14.59	tCCCTTTT--TTTTAATTCCAAaa	x|||||||xx|||:||xx||||xx	tGGGAAAATGAAAGTT--GGTTat	RBM14
bta-miR-196a	ENSBTAT00000001642	ENSBTAG00000001244	615	636	-14.08	gTCCATCACCGTtgtctcatgt	x|||||||xx||xxxxxxxxxx	tAGGTAGTTTCAtgttgttggg	PLAT
bta-miR-1291	ENSBTAT00000001642	ENSBTAG00000001244	54	79	-21.66	tCCGGGACGGCACCACTCAGAAGTct	x|||||||x|x||xx||xx||x||xx	tGGCCCTGAC-TGAAGAC-CTGCAgt	PLAT
bta-miR-2431-3p	ENSBTAT00000068959	ENSBTAG00000001246	160	182	-27.77	gTGGGGGTGGGGGgggtatctcg	x||||||||::x|xxxxxxxxxx	cACCCCCACTTGCatgaccctga	ATP1A1
bta-miR-2431-3p	ENSBTAT00000085581	ENSBTAG00000001246	160	182	-27.77	gTGGGGGTGGGGGgggtatctcg	x||||||||::x|xxxxxxxxxx	cACCCCCACTTGCatgaccctga	ATP1A1
bta-miR-2431-3p	ENSBTAT00000086781	ENSBTAG00000001246	160	182	-27.77	gTGGGGGTGGGGGgggtatctcg	x||||||||::x|xxxxxxxxxx	cACCCCCACTTGCatgaccctga	ATP1A1
bta-miR-106a	ENSBTAT00000001660	ENSBTAG00000001258	1109	1130	-15.41	tTTTCACGT-TGTTGTTGTTTtt	x|||||||xx|||:::x||::xx	aAAAGTGCTTACAGTG-CAGGta	TMEM50B
bta-miR-144	ENSBTAT00000001660	ENSBTAG00000001258	985	1006	-12.51	aTGTCATAaagtatgagtcgtt	x|||||||xxxxxxxxxxxxxx	tACAGTATagatgatgtactag	TMEM50B
bta-miR-182	ENSBTAT00000001660	ENSBTAG00000001258	65	88	-21.16	aAACCGTTACACAT-TTGAtatgac	x|||||||||x|||x||||xxxxxx	tTTGGCAATG-GTAGAACTcacact	TMEM50B
bta-miR-671	ENSBTAT00000001660	ENSBTAG00000001258	1347	1367	-17.64	aCCTTCGG--TCTGCCataaaaa	x|||||||xx:||x||xxxxxxx	aGGAAGCCCTGGAGGGgctggag	TMEM50B
bta-miR-2332	ENSBTAT00000001660	ENSBTAG00000001258	664	688	-18.18	gCCAAATTCGACGAAaacaattctt	x||||||||x|x|||xxxxxxxxxx	cGGTTTAAGGT-CTTggagacaaag	TMEM50B
bta-miR-144	ENSBTAT00000001671	ENSBTAG00000001269	72	92	-12.45	aTGTCATAAAAGGTA-GTGAaa	x|||||||xxx:x||x:|||xx	tACAGTATAGATGATGTACTag	TMEM165
bta-miR-769	ENSBTAT00000001671	ENSBTAG00000001269	233	253	-11.94	cCTCTGGAA-TACAAttgtatt	x|||||||xx:x|||xxxxxxx	tGAGACCTCCGGGTTctgagct	TMEM165
bta-miR-2431-3p	ENSBTAT00000001671	ENSBTAG00000001269	282	303	-28.87	aTGGGGGTGGA-GTGGGGGtcgg	x||||||||:|x||:xx||xxxx	cACCCCCACTTGCATGACCctga	TMEM165
bta-miR-2370-5p	ENSBTAT00000083457	ENSBTAG00000001282	344	365	-10.5	cCCCTTTTTTGGTTGGTTTAtt	x|||||||x:xx|:::::x|xx	tGGGAAAATGAAAGTTGGTTat	RALGAPA1
bta-miR-574	ENSBTAT00000083457	ENSBTAG00000001282	350	373	-11.99	cCTCACACCCCCTTTTTTGgttgg	x|||||||x|x|x:x:|::xxxxx	tGAGTGTGTGTGTGTGAGTgtgtg	RALGAPA1
bta-miR-1949	ENSBTAT00000083457	ENSBTAG00000001282	911	932	-25.87	aTATGGTCCCA-GGTCGTcggtt	x||||||||x|x||||||xxxxx	tATACCAGGATGCCAGCAtagtt	RALGAPA1
bta-miR-182	ENSBTAT00000001699	ENSBTAG00000001289	208	231	-16.16	tAACCGTTGTTAAAAAGAGTCTgt	x|||||||:::|xxxx||||x|xx	tTTGGCAATGGTAGAACTCACAct	MRPL18
bta-miR-181b	ENSBTAT00000001702	ENSBTAG00000001294	23	46	-10.19	aTGTAAGTTTATTTATTTATCaat	x|||||||xxxxx:|x::|:|xxx	aACATTCATTGCTGTCGGTGGgtt	PPP1R15A
bta-miR-6535	ENSBTAT00000001718	ENSBTAG00000001302	144	165	-25.93	gTCCCCCTCCCCtctatgtcga	x||||||||x||xxxxxxxxxx	tAGGGGGAGCGGttggaggact	MRPS28
bta-miR-2303	ENSBTAT00000001731	ENSBTAG00000001311	214	233	-12.86	tGACTTACAA-AGAAGAaaca	x|||||||x|x||xx||xxxx	tCTGAATGATGTCGACTgatg	MORF4L2
bta-miR-1949	ENSBTAT00000001731	ENSBTAG00000001311	15	38	-18.56	cTATGGTCTGTATTGTCGctcacc	x|||||||:x||:x||||xxxxxx	tATACCAGG-ATGCCAGCatagtt	MORF4L2
bta-miR-31	ENSBTAT00000001753	ENSBTAG00000001328	188	209	-18.56	aCCGTTCTGACGAagtgcaatc	x|||||||x||||xxxxxxxxx	aGGCAAGA-TGCTggcatagct	SLBP
bta-miR-31	ENSBTAT00000074628	ENSBTAG00000001328	188	209	-18.56	aCCGTTCTGACGAagtgcaatc	x|||||||x||||xxxxxxxxx	aGGCAAGA-TGCTggcatagct	SLBP
bta-miR-497	ENSBTAT00000001753	ENSBTAG00000001328	286	307	-18.51	cTCGTCGTcaaagtgtggacgt	x|||||||xxxxxxxxxxxxxx	cAGCAGCAcactgtggtttgta	SLBP
bta-miR-497	ENSBTAT00000074628	ENSBTAG00000001328	286	307	-18.51	cTCGTCGTcaaagtgtggacgt	x|||||||xxxxxxxxxxxxxx	cAGCAGCAcactgtggtttgta	SLBP
bta-miR-503-3p	ENSBTAT00000001753	ENSBTAG00000001328	570	592	-18.95	cCTCATAATAtctatcttccggg	x|||||||:|xxxxxxxxxxxxx	gGAGTATTGTttctgctgcccgg	SLBP
bta-miR-503-3p	ENSBTAT00000074628	ENSBTAG00000001328	570	592	-18.95	cCTCATAATAtctatcttccggg	x|||||||:|xxxxxxxxxxxxx	gGAGTATTGTttctgctgcccgg	SLBP
bta-miR-182	ENSBTAT00000001754	ENSBTAG00000001329	54	76	-18.2	aAACCGTTGC-ATCTccgacacta	x|||||||:|x||||xxxxxxxxx	tTTGGCAATGGTAGAactcacact	CLPTM1L
bta-miR-182	ENSBTAT00000082370	ENSBTAG00000001329	54	76	-18.2	aAACCGTTGC-ATCTccgacacta	x|||||||:|x||||xxxxxxxxx	tTTGGCAATGGTAGAactcacact	CLPTM1L
bta-miR-497	ENSBTAT00000029554	ENSBTAG00000001332	1075	1096	-14.89	tTCGTCGTCTTTCTCCActacg	x|||||||x|xx|x|||xxxxx	cAGCAGCACACTGTGGTttgta	MYO1C
bta-miR-497	ENSBTAT00000029555	ENSBTAG00000001332	1075	1096	-14.89	tTCGTCGTCTTTCTCCActacg	x|||||||x|xx|x|||xxxxx	cAGCAGCACACTGTGGTttgta	MYO1C
bta-miR-671	ENSBTAT00000029554	ENSBTAG00000001332	862	884	-17.34	tCCTTCGGtgtacgtgggaattc	x|||||||xxxxxxxxxxxxxxx	aGGAAGCCctggaggggctggag	MYO1C
bta-miR-671	ENSBTAT00000029555	ENSBTAG00000001332	862	884	-17.34	tCCTTCGGtgtacgtgggaattc	x|||||||xxxxxxxxxxxxxxx	aGGAAGCCctggaggggctggag	MYO1C
bta-miR-2370-5p	ENSBTAT00000029554	ENSBTAG00000001332	396	416	-11.22	tCCCTTTTG-TGTAGGTCAcac	x|||||||:x|x|x:::||xxx	tGGGAAAATGAAAGTTGGTtat	MYO1C
bta-miR-2370-5p	ENSBTAT00000029555	ENSBTAG00000001332	396	416	-11.22	tCCCTTTTG-TGTAGGTCAcac	x|||||||:x|x|x:::||xxx	tGGGAAAATGAAAGTTGGTtat	MYO1C
bta-miR-10162-5p	ENSBTAT00000029554	ENSBTAG00000001332	520	541	-19.28	aCCTGTCCG-TCTGTCtgtctgt	x||||||||x|x:|x|xxxxxxx	tGGACAGGCCAAGCCGctgtgca	MYO1C
bta-miR-10162-5p	ENSBTAT00000029555	ENSBTAG00000001332	520	541	-19.28	aCCTGTCCG-TCTGTCtgtctgt	x||||||||x|x:|x|xxxxxxx	tGGACAGGCCAAGCCGctgtgca	MYO1C
bta-miR-671	ENSBTAT00000001760	ENSBTAG00000001333	1026	1051	-25.93	tCCTTCGGTCGTCCTTTTACGTCgtt	x|||||||xx|x|||:::x||x|xxx	aGGAAGCC--CTGGAGGG-GCTGgag	PPARG
bta-miR-671	ENSBTAT00000044038	ENSBTAG00000001333	1026	1051	-25.93	tCCTTCGGTCGTCCTTTTACGTCgtt	x|||||||xx|x|||:::x||x|xxx	aGGAAGCC--CTGGAGGG-GCTGgag	PPARG
bta-miR-671	ENSBTAT00000044042	ENSBTAG00000001333	1026	1051	-25.93	tCCTTCGGTCGTCCTTTTACGTCgtt	x|||||||xx|x|||:::x||x|xxx	aGGAAGCC--CTGGAGGG-GCTGgag	PPARG
bta-miR-671	ENSBTAT00000083374	ENSBTAG00000001333	1026	1051	-25.93	tCCTTCGGTCGTCCTTTTACGTCgtt	x|||||||xx|x|||:::x||x|xxx	aGGAAGCC--CTGGAGGG-GCTGgag	PPARG
bta-miR-769	ENSBTAT00000001760	ENSBTAG00000001333	1266	1287	-20.35	tCTCTGGAGTCGTAtctgacga	x||||||||x|x:|xxxxxxxx	tGAGACCTCCGGGTtctgagct	PPARG
bta-miR-769	ENSBTAT00000044038	ENSBTAG00000001333	1266	1287	-20.35	tCTCTGGAGTCGTAtctgacga	x||||||||x|x:|xxxxxxxx	tGAGACCTCCGGGTtctgagct	PPARG
bta-miR-769	ENSBTAT00000044042	ENSBTAG00000001333	1266	1287	-20.35	tCTCTGGAGTCGTAtctgacga	x||||||||x|x:|xxxxxxxx	tGAGACCTCCGGGTtctgagct	PPARG
bta-miR-769	ENSBTAT00000083374	ENSBTAG00000001333	1266	1287	-20.35	tCTCTGGAGTCGTAtctgacga	x||||||||x|x:|xxxxxxxx	tGAGACCTCCGGGTtctgagct	PPARG
bta-miR-181b	ENSBTAT00000071257	ENSBTAG00000001342	708	731	-16.03	aTGTAAGTGACtttttgaagtcca	x|||||||:||xxxxxxxxxxxxx	aACATTCATTGctgtcggtgggtt	RSL24D1
bta-miR-181c	ENSBTAT00000071257	ENSBTAG00000001342	710	731	-10.21	aTGTAAGT--GACtttttgaagtc	x|||||||xx|||xxxxxxxxxxx	aACATTCAACCTGtcggtgagttt	RSL24D1
bta-miR-671	ENSBTAT00000071257	ENSBTAG00000001342	24	46	-17.86	cCCTTCGGAATAATCTCAATTaa	x|||||||x|:xx:|:|x|::xx	aGGAAGCCCTGGAGGGGCTGGag	RSL24D1
bta-miR-2370-5p	ENSBTAT00000001767	ENSBTAG00000001342	73	94	-11.74	cCCCTTTTTTTTTTTAagttgt	x|||||||x:|||:x|xxxxxx	tGGGAAAATGAAAGTTggttat	RSL24D1
bta-miR-2370-5p	ENSBTAT00000071257	ENSBTAG00000001342	621	641	-15.24	aCCCTTTTTCAGT-ACCCAAac	x|||||||x|xx|x|x||||xx	tGGGAAAATGAAAGTTGGTTat	RSL24D1
bta-miR-574	ENSBTAT00000071257	ENSBTAG00000001342	498	523	-17.89	tCTCACACCGGTTCGGAGTCACCCtg	x|||||||xx::x|:x|x||||x|xx	tGAGTGTG--TGTGTGTGAGTGTGtg	RSL24D1
bta-miR-503-3p	ENSBTAT00000001767	ENSBTAG00000001342	632	654	-11.87	aCTCATAAGAGGTTTCACcttta	x|||||||x|::xx:x||xxxxx	gGAGTATTGTTTCTGCTGcccgg	RSL24D1
bta-miR-11991	ENSBTAT00000001767	ENSBTAG00000001342	137	159	-12.87	gACAAGACGTTTATAGTTAcatc	x|||||||:|xx|x|::||xxxx	aTGTTCTGTA--TCTTGATtgta	RSL24D1
bta-miR-200a	ENSBTAT00000001780	ENSBTAG00000001349	279	302	-14.92	tTTGTGACTGATGCGTCGTggggt	x|||||||x||:x|:|x|:xxxxx	tAACACTGTCTG-GTAACGatgtt	KIF1C
bta-miR-200a	ENSBTAT00000081136	ENSBTAG00000001349	279	302	-14.92	tTTGTGACTGATGCGTCGTggggt	x|||||||x||:x|:|x|:xxxxx	tAACACTGTCTG-GTAACGatgtt	KIF1C
bta-miR-769	ENSBTAT00000001780	ENSBTAG00000001349	339	358	-18.39	cCTCTGGAG--TGAAGGgagat	x||||||||xx:x|||:xxxxx	tGAGACCTCCGGGTTCTgagct	KIF1C
bta-miR-769	ENSBTAT00000081136	ENSBTAG00000001349	339	358	-18.39	cCTCTGGAG--TGAAGGgagat	x||||||||xx:x|||:xxxxx	tGAGACCTCCGGGTTCTgagct	KIF1C
bta-miR-1296	ENSBTAT00000001780	ENSBTAG00000001349	65	85	-23.88	gATCCCGG-AGGGACGGAGAcc	x|||||||x|xx||x|x|||xx	tTAGGGCCCTGGCTCCATCTcc	KIF1C
bta-miR-1296	ENSBTAT00000081136	ENSBTAG00000001349	65	85	-23.88	gATCCCGG-AGGGACGGAGAcc	x|||||||x|xx||x|x|||xx	tTAGGGCCCTGGCTCCATCTcc	KIF1C
bta-miR-6535	ENSBTAT00000001780	ENSBTAG00000001349	427	448	-26.56	tTCCCCCTCCCCTTACTgaata	x||||||||x||xxx||xxxxx	tAGGGGGAGCGGTTGGAggact	KIF1C
bta-miR-6535	ENSBTAT00000081136	ENSBTAG00000001349	427	448	-26.56	tTCCCCCTCCCCTTACTgaata	x||||||||x||xxx||xxxxx	tAGGGGGAGCGGTTGGAggact	KIF1C
bta-miR-30e-5p	ENSBTAT00000055628	ENSBTAG00000001352	87	113	-23.59	aCATTTGTCTCGACCCTCGACCTTCgt	x|||||||xxx:||xx|x|||||||xx	tGTAAACATCCTTG--A-CTGGAAGct	ENTR1
bta-miR-30e-5p	ENSBTAT00000073821	ENSBTAG00000001352	16	42	-23.59	aCATTTGTCTCGACCCTCGACCTTCgt	x|||||||xxx:||xx|x|||||||xx	tGTAAACATCCTTG--A-CTGGAAGct	ENTR1
bta-miR-30e-5p	ENSBTAT00000079448	ENSBTAG00000001352	16	42	-23.59	aCATTTGTCTCGACCCTCGACCTTCgt	x|||||||xxx:||xx|x|||||||xx	tGTAAACATCCTTG--A-CTGGAAGct	ENTR1
bta-miR-30e-5p	ENSBTAT00000079885	ENSBTAG00000001352	16	42	-23.59	aCATTTGTCTCGACCCTCGACCTTCgt	x|||||||xxx:||xx|x|||||||xx	tGTAAACATCCTTG--A-CTGGAAGct	ENTR1
bta-miR-191	ENSBTAT00000055628	ENSBTAG00000001352	409	431	-22.51	gTTGCCTTGAGTAGAATGTCGat	x|||||||:x|xxxxx:||||xx	cAACGGAATCCCAAAAGCAGCtg	ENTR1
bta-miR-191	ENSBTAT00000073821	ENSBTAG00000001352	338	360	-22.51	gTTGCCTTGAGTAGAATGTCGat	x|||||||:x|xxxxx:||||xx	cAACGGAATCCCAAAAGCAGCtg	ENTR1
bta-miR-191	ENSBTAT00000079448	ENSBTAG00000001352	338	360	-22.51	gTTGCCTTGAGTAGAATGTCGat	x|||||||:x|xxxxx:||||xx	cAACGGAATCCCAAAAGCAGCtg	ENTR1
bta-miR-191	ENSBTAT00000079885	ENSBTAG00000001352	338	360	-22.51	gTTGCCTTGAGTAGAATGTCGat	x|||||||:x|xxxxx:||||xx	cAACGGAATCCCAAAAGCAGCtg	ENTR1
bta-miR-200a	ENSBTAT00000055628	ENSBTAG00000001352	205	229	-21.92	aTTGTGACGGCGTGCAGTGCTTCaa	x|||||||:|x::x||x||||x|xx	tAACACTGTC-TG-GTAACGATGtt	ENTR1
bta-miR-200a	ENSBTAT00000073821	ENSBTAG00000001352	134	158	-21.92	aTTGTGACGGCGTGCAGTGCTTCaa	x|||||||:|x::x||x||||x|xx	tAACACTGTC-TG-GTAACGATGtt	ENTR1
bta-miR-200a	ENSBTAT00000079448	ENSBTAG00000001352	134	158	-21.92	aTTGTGACGGCGTGCAGTGCTTCaa	x|||||||:|x::x||x||||x|xx	tAACACTGTC-TG-GTAACGATGtt	ENTR1
bta-miR-200a	ENSBTAT00000079885	ENSBTAG00000001352	134	158	-21.92	aTTGTGACGGCGTGCAGTGCTTCaa	x|||||||:|x::x||x||||x|xx	tAACACTGTC-TG-GTAACGATGtt	ENTR1
bta-miR-30a-5p	ENSBTAT00000055628	ENSBTAG00000001352	87	113	-23.25	aCATTTGTCTCGACCCTCGACCTTCgt	x|||||||xxx||x|x|x|||||||xx	tGTAAACATC-CTCG-A-CTGGAAGct	ENTR1
bta-miR-30a-5p	ENSBTAT00000073821	ENSBTAG00000001352	16	42	-23.25	aCATTTGTCTCGACCCTCGACCTTCgt	x|||||||xxx||x|x|x|||||||xx	tGTAAACATC-CTCG-A-CTGGAAGct	ENTR1
bta-miR-30a-5p	ENSBTAT00000079448	ENSBTAG00000001352	16	42	-23.25	aCATTTGTCTCGACCCTCGACCTTCgt	x|||||||xxx||x|x|x|||||||xx	tGTAAACATC-CTCG-A-CTGGAAGct	ENTR1
bta-miR-30a-5p	ENSBTAT00000079885	ENSBTAG00000001352	16	42	-23.25	aCATTTGTCTCGACCCTCGACCTTCgt	x|||||||xxx||x|x|x|||||||xx	tGTAAACATC-CTCG-A-CTGGAAGct	ENTR1
bta-miR-30f	ENSBTAT00000055628	ENSBTAG00000001352	90	113	-10.34	aCATTTGTctcgaccctcgacctt	x|||||||xxxxxxxxxxxxxxxx	tGTAAACAccctacactctcagct	ENTR1
bta-miR-30f	ENSBTAT00000073821	ENSBTAG00000001352	19	42	-10.34	aCATTTGTctcgaccctcgacctt	x|||||||xxxxxxxxxxxxxxxx	tGTAAACAccctacactctcagct	ENTR1
bta-miR-30f	ENSBTAT00000079448	ENSBTAG00000001352	19	42	-10.34	aCATTTGTctcgaccctcgacctt	x|||||||xxxxxxxxxxxxxxxx	tGTAAACAccctacactctcagct	ENTR1
bta-miR-30f	ENSBTAT00000079885	ENSBTAG00000001352	19	42	-10.34	aCATTTGTctcgaccctcgacctt	x|||||||xxxxxxxxxxxxxxxx	tGTAAACAccctacactctcagct	ENTR1
bta-miR-148a	ENSBTAT00000001782	ENSBTAG00000001353	536	557	-16.09	gGTCACGTCACGggtccagggc	x|||||||x|x|xxxxxxxxxx	tCAGTGCACTACagaactttgt	PMPCA
bta-miR-320a	ENSBTAT00000001782	ENSBTAG00000001353	612	633	-11.87	gTTTCGACACGtggggcgactg	x|||||||x|:xxxxxxxxxxx	aAAAGCTGGGTtgagagggcga	PMPCA
bta-miR-10a	ENSBTAT00000001782	ENSBTAG00000001353	246	270	-23.76	cTGGGACACCACTGGGGTGAAcggg	x|||||||x|xx|:||x|x||xxxx	tACCCTGTAG--ATCCGAATTtgtg	PMPCA
bta-miR-10b	ENSBTAT00000001782	ENSBTAG00000001353	247	270	-20.88	cTGGGACACCACTGGGGTGAACgg	x|||||||x|xx|||xx|:|||xx	tACCCTGTAGA-ACCGAATTTGtg	PMPCA
bta-miR-152	ENSBTAT00000001782	ENSBTAG00000001353	534	557	-23.23	gGTCACGTCACGGGTCCAGGGCgt	x|||||||x||x|x||xx|::|xx	tCAGTGCA-TGAC-AGAACTTGgg	PMPCA
bta-miR-671	ENSBTAT00000001782	ENSBTAG00000001353	581	603	-20.63	tCCTTCGGGGggagatttggtgt	x||||||||:xxxxxxxxxxxxx	aGGAAGCCCTggaggggctggag	PMPCA
bta-miR-3432a	ENSBTAT00000001782	ENSBTAG00000001353	387	408	-14.37	tCGCCCTActtcccagtgagac	x|||||||xxxxxxxxxxxxxx	tGCGGGATctttagttgtggtg	PMPCA
bta-miR-148a	ENSBTAT00000001802	ENSBTAG00000001368	935	956	-16.29	gGTCACGTGTTcacccttctaa	x||||||||x|xxxxxxxxxxx	tCAGTGCACTAcagaactttgt	LGALS3BP
bta-miR-31	ENSBTAT00000001802	ENSBTAG00000001368	271	292	-22.57	tCCGTTCTTATGACCTCACCct	x|||||||x|:||||xx|x|xx	aGGCAAGA-TGCTGGCATAGct	LGALS3BP
bta-miR-191	ENSBTAT00000001802	ENSBTAG00000001368	102	124	-17.37	gTTGCCTTCGtccccccggtgga	x|||||||x|xxxxxxxxxxxxx	cAACGGAATCccaaaagcagctg	LGALS3BP
bta-miR-146b	ENSBTAT00000001802	ENSBTAG00000001368	560	585	-21.22	tCTCTTGAACCCTT--GGTGTCACGtta	x|||||||xxx|||xx|||:||x||xxx	tGAGAACT---GAATTCCATAG-GCtgt	LGALS3BP
bta-miR-152	ENSBTAT00000001802	ENSBTAG00000001368	935	956	-18.44	gGTCACGTGTTcacccttctaa	x|||||||::|xxxxxxxxxxx	tCAGTGCATGAcagaacttggg	LGALS3BP
bta-miR-200a	ENSBTAT00000001830	ENSBTAG00000001394	246	266	-14.79	aTTGTGACA--CTAAGACTCCac	x||||||||xx|:|xxx||x|xx	tAACACTGTCTGGTAACGATGtt	TMED9
bta-miR-148a	ENSBTAT00000001838	ENSBTAG00000001398	461	479	-13.53	aGTCACGTC---TTTTTAAccg	x|||||||xxxx|:||x||xxx	tCAGTGCACTACAGAACTTtgt	ATP2A2
bta-miR-181b	ENSBTAT00000001838	ENSBTAG00000001398	343	366	-14.41	gTGTAAGTGAAGGattttagacga	x|||||||:|x|:xxxxxxxxxxx	aACATTCATTGCTgtcggtgggtt	ATP2A2
bta-miR-30e-5p	ENSBTAT00000001838	ENSBTAG00000001398	582	605	-12.41	aCATTTGTcttggtagttttggga	x|||||||xxxxxxxxxxxxxxxx	tGTAAACAtccttgactggaagct	ATP2A2
bta-let-7d	ENSBTAT00000001838	ENSBTAG00000001398	474	498	-25.97	aCTCCATCGTCATGAGACGAGTCac	x|||||||:||xxxx:|||x:||xx	aGAGGTAGTAGG---TTGCATAGtt	ATP2A2
bta-miR-181c	ENSBTAT00000001838	ENSBTAG00000001398	345	366	-12.41	gTGTAAGT--GAAGGATTTTagac	x|||||||xx||x:|x:x:|xxxx	aACATTCAACCTGTCGGTGAgttt	ATP2A2
bta-miR-192	ENSBTAT00000001838	ENSBTAG00000001398	917	941	-19.15	tACTGGATGCGTCGTCTTGTCctag	x|||||||:|x|x::xx||||xxxx	cTGACCTATGAATTG--ACAGccag	ATP2A2
bta-miR-200a	ENSBTAT00000001838	ENSBTAG00000001398	254	276	-12.35	cTTGTGACAtgtacgaaaaaaag	x||||||||xxxxxxxxxxxxxx	tAACACTGTctggtaacgatgtt	ATP2A2
bta-let-7g	ENSBTAT00000001838	ENSBTAG00000001398	474	498	-27.82	aCTCCATCGTCATGAGACGAGTCac	x|||||||:|||xxx:||:x|||xx	tGAGGTAGTAGT---TTGTACAGtt	ATP2A2
bta-miR-30a-5p	ENSBTAT00000001838	ENSBTAG00000001398	582	605	-14.08	aCATTTGTCTTGGTAGTTTTggga	x|||||||xxx:|:x|x::|xxxx	tGTAAACATCCTCGACTGGAagct	ATP2A2
bta-let-7a-5p	ENSBTAT00000001838	ENSBTAG00000001398	477	498	-22.58	aCTCCATCGTCatgagacgagt	x|||||||:||xxxxxxxxxxx	tGAGGTAGTAGgttgtatagtt	ATP2A2
bta-let-7b	ENSBTAT00000001838	ENSBTAG00000001398	476	498	-22.85	aCTCCATCGTCATGAGACGagtc	x|||||||:||x::|x||:xxxx	tGAGGTAGTAG-GTTGTGTggtt	ATP2A2
bta-let-7e	ENSBTAT00000001838	ENSBTAG00000001398	478	498	-20.5	aCTCCATCGTCatgagacgag	x|||||||x||xxxxxxxxxx	tGAGGTAGGAGgttgtatagt	ATP2A2
bta-miR-146b	ENSBTAT00000001838	ENSBTAG00000001398	848	871	-15.38	tCTCTTGATTCGGTGAATTatcaa	x|||||||:|x::x|x||:xxxxx	tGAGAACTGAATTCCATAGgctgt	ATP2A2
bta-miR-152	ENSBTAT00000001838	ENSBTAG00000001398	461	479	-20.45	aGTCACGT-CT-TTTT-AACcg	x|||||||x||x|:||x|||xx	tCAGTGCATGACAGAACTTGgg	ATP2A2
bta-miR-30f	ENSBTAT00000001838	ENSBTAG00000001398	576	605	-18.31	aCATTTGTCTTGGTAGTTTTGGGATGTCct	x|||||||xxx||x|xx|x||:||x|||xx	tGTAAACA---CCCT--ACACTCT-CAGct	ATP2A2
bta-miR-503-3p	ENSBTAT00000001838	ENSBTAG00000001398	267	289	-13.88	aCTCATAATttgtcttgtgacat	x|||||||:xxxxxxxxxxxxxx	gGAGTATTGtttctgctgcccgg	ATP2A2
bta-miR-2370-5p	ENSBTAT00000070780	ENSBTAG00000001400	126	149	-12.43	tCCCTTTTTGACCTTTACCCccct	x|||||||xx||x||:|x||xxxx	tGGGAAAA--TGAAAGTTGGttat	AKT2
bta-miR-2285k	ENSBTAT00000070780	ENSBTAG00000001400	280	300	-18.63	tTTTGGCCTTAgagagggtga	x||||||||||xxxxxxxxxx	aAAACCGGAATgaactttttg	AKT2
bta-miR-425-5p	ENSBTAT00000061563	ENSBTAG00000001403	189	210	-13.73	aACTGTGCTAacagacctttca	x|||||||||xxxxxxxxxxxx	aTGACACGATcactcccgttga	PRKCI
bta-miR-503-3p	ENSBTAT00000061563	ENSBTAG00000001403	264	286	-14.38	aCTCATAAAGGAAACGtgttttt	x|||||||x::|x|||xxxxxxx	gGAGTATTGTTTCTGCtgcccgg	PRKCI
bta-miR-320a	ENSBTAT00000001844	ENSBTAG00000001405	1029	1052	-15.92	cTTTCGACATCTGGTTCTTACtag	x|||||||xx|::::|||:x|xxx	aAAAGCTG--GGTTGAGAGGGcga	GLCE
bta-miR-31	ENSBTAT00000001844	ENSBTAG00000001405	1481	1503	-26.45	tCCGTTCTACGTCACCGTccgtc	x||||||||||xx|||||xxxxx	aGGCAAGATGC--TGGCAtagct	GLCE
bta-miR-192	ENSBTAT00000001844	ENSBTAG00000001405	969	991	-16.6	gACTGGATTATAAAaaggaattt	x|||||||xx|x||xxxxxxxxx	cTGACCTATGAATTgacagccag	GLCE
bta-miR-200a	ENSBTAT00000001844	ENSBTAG00000001405	605	628	-10.99	cTTGTGACCAACACAaaaattaaa	x|||||||xx||x||xxxxxxxxx	tAACACTGTCTG-GTaacgatgtt	GLCE
bta-miR-146b	ENSBTAT00000001844	ENSBTAG00000001405	274	297	-17.95	tCTCTTGACCTGATGGAcaccttg	x||||||||x|:|x|x|xxxxxxx	tGAGAACTGAATTCCATaggctgt	GLCE
bta-miR-2370-5p	ENSBTAT00000001844	ENSBTAG00000001405	948	968	-13.37	cCCCTTTT-CTTAGATCTtttc	x|||||||x|||xx|x|:xxxx	tGGGAAAATGAAAGTTGGttat	GLCE
bta-miR-2408	ENSBTAT00000001844	ENSBTAG00000001405	1852	1873	-14.9	cTGCACACCAGTCAATTTGacc	x|||||||x|x||x|x|:|xxx	cACGTGTG-TGAGCTCAGCcgg	GLCE
bta-miR-6535	ENSBTAT00000001844	ENSBTAG00000001405	1877	1898	-28.62	aTCCCCCTTGACAACACCGTtt	x|||||||:|x||||xx|x|xx	tAGGGGGAGCGGTTGGAGGAct	GLCE
bta-miR-11991	ENSBTAT00000001844	ENSBTAG00000001405	685	705	-11.41	aACAAGACAAAACATTAAaga	x||||||||x|xx|:|||xxx	aTGTTCTGTATCTTGATTgta	GLCE
bta-miR-148a	ENSBTAT00000001846	ENSBTAG00000001407	1155	1176	-11.41	cGTCACGTccccattctccgcg	x|||||||xxxxxxxxxxxxxx	tCAGTGCActacagaactttgt	AP3S2
bta-miR-30e-5p	ENSBTAT00000001846	ENSBTAG00000001407	601	627	-15.51	aCATTTGTGTGTCGATCCGATCGTCtc	x|||||||:x|xx||x|x||:|x||xx	tGTAAACAT-C--CTTGACTGGAAGct	AP3S2
bta-let-7d	ENSBTAT00000001846	ENSBTAG00000001407	202	224	-17.96	aCTCCATCGGTCCCGGGGAgtgt	x|||||||:x|||x:x|x|xxxx	aGAGGTAGT-AGGTTGCATagtt	AP3S2
bta-miR-200a	ENSBTAT00000001846	ENSBTAG00000001407	1456	1478	-16.23	gTTGTGACGGGTAGAGACTCCaa	x|||||||:|::x:xxx||x|xx	tAACACTGTCTGGTAACGATGtt	AP3S2
bta-let-7g	ENSBTAT00000001846	ENSBTAG00000001407	202	224	-18.31	aCTCCATCGGTCccggggagtgt	x|||||||:x||xxxxxxxxxxx	tGAGGTAGT-AGtttgtacagtt	AP3S2
bta-miR-30a-5p	ENSBTAT00000001846	ENSBTAG00000001407	601	627	-17.61	aCATTTGTGTGTCGATCCGATCGTCtc	x|||||||:x|xx||x|x||:|x||xx	tGTAAACAT-C--CTCGACTGGAAGct	AP3S2
bta-let-7a-5p	ENSBTAT00000001846	ENSBTAG00000001407	202	224	-18.95	aCTCCATCGGTCCcggggagtgt	x|||||||:x|||xxxxxxxxxx	tGAGGTAGT-AGGttgtatagtt	AP3S2
bta-let-7b	ENSBTAT00000001846	ENSBTAG00000001407	202	224	-18.47	aCTCCATCGGTCCcggggagtgt	x|||||||:x|||xxxxxxxxxx	tGAGGTAGT-AGGttgtgtggtt	AP3S2
bta-let-7e	ENSBTAT00000001846	ENSBTAG00000001407	203	224	-16.57	aCTCCATCGGTCCcggggagtg	x|||||||xx|||xxxxxxxxx	tGAGGTAGG-AGGttgtatagt	AP3S2
bta-miR-152	ENSBTAT00000001846	ENSBTAG00000001407	1155	1176	-13.08	cGTCACGTCCccattctccgcg	x|||||||x|xxxxxxxxxxxx	tCAGTGCATGacagaacttggg	AP3S2
bta-miR-30f	ENSBTAT00000001846	ENSBTAG00000001407	601	627	-16.81	aCATTTGTGTGTCGATCCGATCGTCtc	x||||||||x|xx|||xx||xx|||xx	tGTAAACAC-C--CTACACTCTCAGct	AP3S2
bta-miR-2370-5p	ENSBTAT00000001846	ENSBTAG00000001407	975	995	-14.11	cCCCTTTT-CTA-CGACACGAcg	x|||||||x||xx|:||x|:|xx	tGGGAAAATGAAAGTTG-GTTat	AP3S2
bta-miR-2431-3p	ENSBTAT00000001846	ENSBTAG00000001407	211	233	-20.55	cTGGGGGTGACTCCATCGGtccc	x|||||||||x:xx|:x||xxxx	cACCCCCACTTGCATGACCctga	AP3S2
bta-miR-200a	ENSBTAT00000001855	ENSBTAG00000001415	58	82	-15.74	tTTGTGACACTTGGGGACT-CTACct	x||||||||xxx|:xx|x|x||||xx	tAACACTGT---CTGGTAACGATGtt	THOC6
bta-miR-200a	ENSBTAT00000066513	ENSBTAG00000001415	24	48	-15.74	tTTGTGACACTTGGGGACT-CTACct	x||||||||xxx|:xx|x|x||||xx	tAACACTGT---CTGGTAACGATGtt	THOC6
bta-miR-200a	ENSBTAT00000073058	ENSBTAG00000001415	24	48	-15.74	tTTGTGACACTTGGGGACT-CTACct	x||||||||xxx|:xx|x|x||||xx	tAACACTGT---CTGGTAACGATGtt	THOC6
bta-miR-671	ENSBTAT00000001861	ENSBTAG00000001419	546	568	-20.8	aCCTTCGGGGTCaaaggtgtaat	x||||||||::|xxxxxxxxxxx	aGGAAGCCCTGGaggggctggag	MRPL4
bta-miR-671	ENSBTAT00000069787	ENSBTAG00000001419	546	568	-20.8	aCCTTCGGGGTCaaaggtgtaat	x||||||||::|xxxxxxxxxxx	aGGAAGCCCTGGaggggctggag	MRPL4
bta-miR-671	ENSBTAT00000070840	ENSBTAG00000001419	2605	2627	-20.8	aCCTTCGGGGTCaaaggtgtaat	x||||||||::|xxxxxxxxxxx	aGGAAGCCCTGGaggggctggag	MRPL4
bta-miR-1296	ENSBTAT00000070840	ENSBTAG00000001419	1865	1886	-29.52	aATCCCGGTCGGGGGGCAGGgg	x|||||||xxxx|:||x||:xx	tTAGGGCCCTGGCTCCATCTcc	MRPL4
bta-miR-2431-3p	ENSBTAT00000070840	ENSBTAG00000001419	467	489	-27.24	aTGGGGGTGTCCGGTCTAGGGtc	x||||||||xx||xx||x||:xx	cACCCCCACTTGCATGACCCTga	MRPL4
bta-miR-10162-5p	ENSBTAT00000070840	ENSBTAG00000001419	121	143	-18.22	cCCTGTCCATTAAAGCGGagtct	x|||||||xx|xxx|||:xxxxx	tGGACAGGCCAAGCCGCTgtgca	MRPL4
bta-miR-2285bf	ENSBTAT00000070840	ENSBTAG00000001419	1622	1642	-10.39	aTTTGTGCTacatgactccgc	x||||||||xxxxxxxxxxxx	aAAACACGAacaaactttttg	MRPL4
bta-miR-6535	ENSBTAT00000001863	ENSBTAG00000001420	28	50	-28	tTCCCCCTGCTCCCGTCTCCgga	x|||||||x|x||x::||||xxx	tAGGGGGA-GCGGTTGGAGGact	ABHD12
bta-miR-6535	ENSBTAT00000070340	ENSBTAG00000001420	28	50	-28	tTCCCCCTGCTCCCGTCTCCgga	x|||||||x|x||x::||||xxx	tAGGGGGA-GCGGTTGGAGGact	ABHD12
bta-miR-6535	ENSBTAT00000082588	ENSBTAG00000001420	28	50	-28	tTCCCCCTGCTCCCGTCTCCgga	x|||||||x|x||x::||||xxx	tAGGGGGA-GCGGTTGGAGGact	ABHD12
bta-miR-148a	ENSBTAT00000001868	ENSBTAG00000001425	772	799	-18.14	tGTCACGTAGGGAAGGATCCTTCAGAgt	x|||||||xxx||x|xx||x||x|:|xx	tCAGTGCA---CTAC--AG-AACTTTgt	FBXO11
bta-miR-320a	ENSBTAT00000001868	ENSBTAG00000001425	364	384	-10.14	gTTTCGACG-AACagataactt	x|||||||xx|||xxxxxxxxx	aAAAGCTGGGTTGagagggcga	FBXO11
bta-miR-181b	ENSBTAT00000001868	ENSBTAG00000001425	545	569	-13.8	gTGTAAGTTCATGTTATTCtaaaac	x|||||||xx|:|x:|x:|xxxxxx	aACATTCAT-TGCTGTCGGtgggtt	FBXO11
bta-miR-181c	ENSBTAT00000001868	ENSBTAG00000001425	548	569	-15.07	gTGTAAGTTC-AT-GTTATTCtaa	x||||||||xx|:x|::|:||xxx	aACATTCAACCTGTCGGTGAGttt	FBXO11
bta-miR-497	ENSBTAT00000001868	ENSBTAG00000001425	371	393	-19.12	tTCGTCGTTGTTTCGACGAACag	x|||||||x||xx|:x|:|||xx	cAGCAGCA-CACTGTGGTTTGta	FBXO11
bta-miR-152	ENSBTAT00000001868	ENSBTAG00000001425	778	799	-20.94	tGTCACGTAgggaaggatcctt	x||||||||xxxxxxxxxxxxx	tCAGTGCATgacagaacttggg	FBXO11
bta-miR-1949	ENSBTAT00000001868	ENSBTAG00000001425	663	688	-13.92	cTATGGTCTTTGTAACGACCTATatt	x|||||||:|xxx|xx|x|x|||xxx	tATACCAGGA---TGCCAGCATAgtt	FBXO11
bta-miR-30e-5p	ENSBTAT00000001883	ENSBTAG00000001435	201	224	-16.21	cCATTTGTAGAATATGAaaattct	x|||||||||x|xx|||xxxxxxx	tGTAAACATCCTTGACTggaagct	ARL6IP6
bta-miR-30a-5p	ENSBTAT00000001883	ENSBTAG00000001435	201	224	-16.18	cCATTTGTAGAATATGAaaattct	x|||||||||x|xx|||xxxxxxx	tGTAAACATCCTCGACTggaagct	ARL6IP6
bta-miR-497	ENSBTAT00000001883	ENSBTAG00000001435	79	102	-20.2	cTCGTCGT-TGAAAGAACCAGAaga	x|||||||x|||x|xxx|||:|xxx	cAGCAGCACACTGT---GGTTTgta	ARL6IP6
bta-miR-144	ENSBTAT00000001883	ENSBTAG00000001435	1161	1186	-10.47	tTGTCATAAAATTTATCAGGTAGAaa	x|||||||xxx|:||:x|x:|x||xx	tACAGTAT---AGATGATGTA-CTag	ARL6IP6
bta-miR-2370-5p	ENSBTAT00000001883	ENSBTAG00000001435	1171	1192	-10.32	tCCCTTTTGTCATAAAatttat	x|||||||::xx|x||xxxxxx	tGGGAAAATGAAAGTTggttat	ARL6IP6
bta-miR-6119-5p	ENSBTAT00000001883	ENSBTAG00000001435	205	227	-11.67	aCTCCATTTGTAGAATAtgaaaa	x||||||||x|x:|x||xxxxxx	aGAGGTAAAAAATTGATttgact	ARL6IP6
bta-miR-11991	ENSBTAT00000001883	ENSBTAG00000001435	293	313	-18.76	tACAAGACGTAGATCCAAaga	x|||||||:||||x|x||xxx	aTGTTCTGTATCTTGATTgta	ARL6IP6
bta-miR-320a	ENSBTAT00000001888	ENSBTAG00000001440	911	932	-12.98	gTTTCGACTTGTTACTACacac	x|||||||:::x:x||x|xxxx	aAAAGCTGGGTTGAGAGGgcga	PMM2
bta-miR-497	ENSBTAT00000001888	ENSBTAG00000001440	611	634	-21.45	cTCGTCGTAGAGCCCGCCGGACgc	x|||||||x|x|x|x:||::||xx	cAGCAGCA-CACTG-TGGTTTGta	PMM2
bta-miR-144	ENSBTAT00000001888	ENSBTAG00000001440	1248	1270	-13.9	aTGTCATAGTAAATTTTAGGtcg	x|||||||x|xx|:|x:|x|xxx	tACAGTAT-AGATGATGTACtag	PMM2
bta-miR-451	ENSBTAT00000001888	ENSBTAG00000001440	128	147	-12.51	cTTGGCAA--GAACTG-TTCGga	x|||||||xx|x|x||x:||:xx	aAACCGTTACCATTACTGAGTtt	PMM2
bta-miR-1291	ENSBTAT00000001888	ENSBTAG00000001440	668	694	-23.23	tCCGGGACTAGGGACTCCTcacttcac	x||||||||xxx||||x||xxxxxxxx	tGGCCCTGA---CTGAAGAcctgcagt	PMM2
bta-miR-2431-3p	ENSBTAT00000001888	ENSBTAG00000001440	205	230	-21.41	tTGGGGGTCCCCGTGACACTGacgtg	x|||||||xxx|||xxx||||xxxxx	cACCCCCACTTGCA---TGACcctga	PMM2
bta-miR-11991	ENSBTAT00000001888	ENSBTAG00000001440	245	263	-10.84	gACAAGACCTT--ACTACCcc	x|||||||x|xxx||||x|xx	aTGTTCTGTATCTTGATTGta	PMM2
bta-miR-2431-3p	ENSBTAT00000001895	ENSBTAG00000001446	241	263	-23.09	aTGGGGGTGGTTTTTTCGGGGta	x||||||||:x:x|x:x|||:xx	cACCCCCACTTGCATGACCCTga	ABRACL
bta-miR-10a	ENSBTAT00000001914	ENSBTAG00000001460	1675	1698	-17.59	aTGGGACA-CTACGTTCTTAtgttc	x|||||||x|||x|xx||||xxxxx	tACCCTGTAGATCC--GAATttgtg	LIN7C
bta-miR-181b	ENSBTAT00000001914	ENSBTAG00000001460	1427	1454	-20.29	gTGTAAGTTGGTACGTTAGGTCACaagt	x|||||||xxxx|||x:||x:|||xxxx	aACATTCAT---TGCTGTC-GGTGggtt	LIN7C
bta-miR-30e-5p	ENSBTAT00000001914	ENSBTAG00000001460	2947	2973	-16.05	aCATTTGTTTCATGAACTCGGTTTgat	x|||||||xxx|x|||||x:x:||xxx	tGTAAACA---TCCTTGACTGGAAgct	LIN7C
bta-miR-181c	ENSBTAT00000001914	ENSBTAG00000001460	1430	1454	-23.59	gTGTAAGTTGGTACGTTAGGTCAca	x||||||||||x||:x:x:x|||xx	aACATTCAACC-TGTCGGTGAGTtt	LIN7C
bta-miR-10b	ENSBTAT00000001914	ENSBTAG00000001460	1675	1698	-15.36	aTGGGACA-CTACGTTCTTAtgttc	x|||||||x||xx|xx||||xxxxx	tACCCTGTAGAACC--GAATttgtg	LIN7C
bta-miR-30a-5p	ENSBTAT00000001914	ENSBTAG00000001460	2947	2973	-14.54	aCATTTGTTTCATGAACTCGGTTTgat	x|||||||xxx|x||x||x:x:||xxx	tGTAAACA---TCCTCGACTGGAAgct	LIN7C
bta-miR-146b	ENSBTAT00000001914	ENSBTAG00000001460	329	352	-12.44	cCTCTTGACAAGAAAAATTTattc	x||||||||xx:|xxx||::xxxx	tGAGAACTGAATTCCATAGGctgt	LIN7C
bta-miR-30f	ENSBTAT00000001914	ENSBTAG00000001460	2950	2973	-11.63	aCATTTGTTTCATGaactcggttt	x|||||||xxx|||xxxxxxxxxx	tGTAAACACCCTACactctcagct	LIN7C
bta-miR-2303	ENSBTAT00000001914	ENSBTAG00000001460	2851	2870	-15.08	aGACTTACTA-GTTTGGggtt	x|||||||||x:x:||:xxxx	tCTGAATGATGTCGACTgatg	LIN7C
bta-miR-6535	ENSBTAT00000001914	ENSBTAG00000001460	2431	2453	-24.15	tTCCCCCTTTGTCACCaggagtt	x|||||||:x|:||x|xxxxxxx	tAGGGGGAG-CGGTTGgaggact	LIN7C
bta-miR-30e-5p	ENSBTAT00000001917	ENSBTAG00000001463	186	211	-19.69	aCATTTGTAAAGGAGTTTCCCTTgtc	x||||||||xx|||::|xx||||xxx	tGTAAACAT--CCTTGACTGGAAgct	TNKS
bta-miR-30a-5p	ENSBTAT00000001917	ENSBTAG00000001463	186	211	-24.94	aCATTTGTAAAGGAGTTTCCCTTgtc	x||||||||xx||||:|xx||||xxx	tGTAAACAT--CCTCGACTGGAAgct	TNKS
bta-miR-30f	ENSBTAT00000001917	ENSBTAG00000001463	191	211	-12.88	aCATTTGTA--AAG-GAGTTTCcc	x|||||||xxx|x|x|||xx||xx	tGTAAACACCCTACACTCTCAGct	TNKS
bta-miR-2335	ENSBTAT00000001917	ENSBTAG00000001463	413	437	-12.39	aCTATTACGAGTCTTTTTTGATTtt	x|||||||x|xxx:|xx||||:|xx	aGATAATGAT---GACTAACTGAat	TNKS
bta-miR-2370-5p	ENSBTAT00000001917	ENSBTAG00000001463	311	329	-19.48	aCCCTTTT-CAT--AACCAAta	x|||||||x|x|xx||||||xx	tGGGAAAATGAAAGTTGGTTat	TNKS
bta-miR-320a	ENSBTAT00000077964	ENSBTAG00000001468	1833	1854	-14.56	cTTTCGACAAACCTaaagtaat	x|||||||xx|x||xxxxxxxx	aAAAGCTGGGTTGAgagggcga	SAMD4A
bta-miR-181b	ENSBTAT00000077964	ENSBTAG00000001468	3845	3866	-11.75	gTGTAAGTG--GAAATTCATTTct	x|||||||:xx||x|x:||:::xx	aACATTCATTGCTGTCGGTGGGtt	SAMD4A
bta-miR-30e-5p	ENSBTAT00000077964	ENSBTAG00000001468	596	619	-11.09	aCATTTGTTATGTGTT-AGTTTCaa	x|||||||x|x|x::|x|x:|||xx	tGTAAACA-TCCTTGACTGGAAGct	SAMD4A
bta-miR-181c	ENSBTAT00000077964	ENSBTAG00000001468	3844	3866	-16.11	gTGTAAGT-GGAAATTCATTTcta	x|||||||x|||x|x:||:|:xxx	aACATTCAACCTGTCGGTGAGttt	SAMD4A
bta-miR-200a	ENSBTAT00000077964	ENSBTAG00000001468	40	63	-16.63	aTTGTGACCTGGGCGTCGTCAgct	x|||||||xx|:x|:|x|:x|xxx	tAACACTGT-CTGGTAACGATgtt	SAMD4A
bta-miR-30a-5p	ENSBTAT00000077964	ENSBTAG00000001468	596	619	-13.98	aCATTTGTTATGTGTT-AGTTTCaa	x|||||||x|x|x|:|x|x:|||xx	tGTAAACA-TCCTCGACTGGAAGct	SAMD4A
bta-miR-342	ENSBTAT00000077964	ENSBTAG00000001468	2182	2208	-26.52	cGAGTGTGTACT-AGCAGGTAGGGTtgt	x||||||||xx|x|||xx||x||||xxx	tCTCACACAGAAATCG--CA-CCCAtct	SAMD4A
bta-miR-497	ENSBTAT00000077964	ENSBTAG00000001468	3236	3258	-24.17	gTCGTCGTAGATAAAACGAACga	x|||||||x|xx|x|x|:|||xx	cAGCAGCA-CACTGTGGTTTGta	SAMD4A
bta-miR-182	ENSBTAT00000077964	ENSBTAG00000001468	4086	4107	-15.87	gAACCGTTGT-A-CTTGAtccgtt	x|||||||::x|x|||||xxxxxx	tTTGGCAATGGTAGAACTcacact	SAMD4A
bta-miR-183	ENSBTAT00000077964	ENSBTAG00000001468	2103	2126	-17.31	tTACCGTGAACCAATTTttttttt	x||||||||x|||x:||xxxxxxx	tATGGCACT-GGTAGAAttcactg	SAMD4A
bta-miR-30f	ENSBTAT00000077964	ENSBTAG00000001468	598	619	-17.71	aCATTTGTT--ATGTGTTAGTTtc	x|||||||xxx|||||xx|||:xx	tGTAAACACCCTACACTCTCAGct	SAMD4A
bta-miR-671	ENSBTAT00000077964	ENSBTAG00000001468	282	305	-16.63	tCCTTCGGTGAACgtaagggaggt	x|||||||x||x|xxxxxxxxxxx	aGGAAGCC-CTGGaggggctggag	SAMD4A
bta-miR-2332	ENSBTAT00000077964	ENSBTAG00000001468	3205	3229	-14.08	aCCAAATTGTTTCACTTTGAGTTtt	x|||||||x:xxx||:|:xx|||xx	cGGTTTAAGGTCTTGGAGA-CAAag	SAMD4A
bta-miR-2370-5p	ENSBTAT00000077964	ENSBTAG00000001468	99	120	-14.1	cCCCTTTTTTTTCCGACgtttc	x|||||||x:||x|:||xxxxx	tGGGAAAATGAAAGTTGgttat	SAMD4A
bta-miR-2431-3p	ENSBTAT00000077964	ENSBTAG00000001468	300	322	-20.34	tTGGGGGTAAAGGTAggtccttc	x|||||||x||x|||xxxxxxxx	cACCCCCACTTGCATgaccctga	SAMD4A
bta-miR-6535	ENSBTAT00000077964	ENSBTAG00000001468	3486	3507	-19.14	cTCCCCCTCACTtgtagatgtg	x||||||||x|:xxxxxxxxxx	tAGGGGGAGCGGttggaggact	SAMD4A
bta-miR-10162-5p	ENSBTAT00000077964	ENSBTAG00000001468	2709	2731	-17.25	cCCTGTCCGaggattttaaatag	x||||||||xxxxxxxxxxxxxx	tGGACAGGCcaagccgctgtgca	SAMD4A
bta-miR-320a	ENSBTAT00000001923	ENSBTAG00000001470	269	289	-15.94	tTTTCGACTGGG-TCTgagtcc	x|||||||:x::x|||xxxxxx	aAAAGCTGGGTTGAGAgggcga	DTX2
bta-miR-320a	ENSBTAT00000072815	ENSBTAG00000001470	269	289	-15.94	tTTTCGACTGGG-TCTgagtcc	x|||||||:x::x|||xxxxxx	aAAAGCTGGGTTGAGAgggcga	DTX2
bta-miR-320a	ENSBTAT00000077032	ENSBTAG00000001470	269	289	-15.94	tTTTCGACTGGG-TCTgagtcc	x|||||||:x::x|||xxxxxx	aAAAGCTGGGTTGAGAgggcga	DTX2
bta-let-7d	ENSBTAT00000001923	ENSBTAG00000001470	154	175	-18	aCTCCATCGCCGTAGGCTTCgg	x|||||||:x|xx|x|xx||xx	aGAGGTAGTAGGTTGCATAGtt	DTX2
bta-let-7d	ENSBTAT00000072815	ENSBTAG00000001470	154	175	-18	aCTCCATCGCCGTAGGCTTCgg	x|||||||:x|xx|x|xx||xx	aGAGGTAGTAGGTTGCATAGtt	DTX2
bta-let-7d	ENSBTAT00000077032	ENSBTAG00000001470	154	175	-18	aCTCCATCGCCGTAGGCTTCgg	x|||||||:x|xx|x|xx||xx	aGAGGTAGTAGGTTGCATAGtt	DTX2
bta-let-7g	ENSBTAT00000001923	ENSBTAG00000001470	154	175	-18.48	aCTCCATCGCCGTAGGCTTCgg	x|||||||:x|:x|x:xx||xx	tGAGGTAGTAGTTTGTACAGtt	DTX2
bta-let-7g	ENSBTAT00000072815	ENSBTAG00000001470	154	175	-18.48	aCTCCATCGCCGTAGGCTTCgg	x|||||||:x|:x|x:xx||xx	tGAGGTAGTAGTTTGTACAGtt	DTX2
bta-let-7g	ENSBTAT00000077032	ENSBTAG00000001470	154	175	-18.48	aCTCCATCGCCGTAGGCTTCgg	x|||||||:x|:x|x:xx||xx	tGAGGTAGTAGTTTGTACAGtt	DTX2
bta-let-7a-5p	ENSBTAT00000001923	ENSBTAG00000001470	154	175	-19.43	aCTCCATCGCCGTAGGCTTCgg	x|||||||:x|xx|x:xx||xx	tGAGGTAGTAGGTTGTATAGtt	DTX2
bta-let-7a-5p	ENSBTAT00000072815	ENSBTAG00000001470	154	175	-19.43	aCTCCATCGCCGTAGGCTTCgg	x|||||||:x|xx|x:xx||xx	tGAGGTAGTAGGTTGTATAGtt	DTX2
bta-let-7a-5p	ENSBTAT00000077032	ENSBTAG00000001470	154	175	-19.43	aCTCCATCGCCGTAGGCTTCgg	x|||||||:x|xx|x:xx||xx	tGAGGTAGTAGGTTGTATAGtt	DTX2
bta-let-7b	ENSBTAT00000001923	ENSBTAG00000001470	154	175	-21.22	aCTCCATCGCCGTAGGCTTCgg	x|||||||:x|xx|x:|x:|xx	tGAGGTAGTAGGTTGTGTGGtt	DTX2
bta-let-7b	ENSBTAT00000072815	ENSBTAG00000001470	154	175	-21.22	aCTCCATCGCCGTAGGCTTCgg	x|||||||:x|xx|x:|x:|xx	tGAGGTAGTAGGTTGTGTGGtt	DTX2
bta-let-7b	ENSBTAT00000077032	ENSBTAG00000001470	154	175	-21.22	aCTCCATCGCCGTAGGCTTCgg	x|||||||:x|xx|x:|x:|xx	tGAGGTAGTAGGTTGTGTGGtt	DTX2
bta-let-7e	ENSBTAT00000001923	ENSBTAG00000001470	155	175	-18.28	aCTCCATCgccgtaggcttcg	x|||||||xxxxxxxxxxxxx	tGAGGTAGgaggttgtatagt	DTX2
bta-let-7e	ENSBTAT00000072815	ENSBTAG00000001470	155	175	-18.28	aCTCCATCgccgtaggcttcg	x|||||||xxxxxxxxxxxxx	tGAGGTAGgaggttgtatagt	DTX2
bta-let-7e	ENSBTAT00000077032	ENSBTAG00000001470	155	175	-18.28	aCTCCATCgccgtaggcttcg	x|||||||xxxxxxxxxxxxx	tGAGGTAGgaggttgtatagt	DTX2
bta-miR-193a-5p	ENSBTAT00000001929	ENSBTAG00000001473	881	902	-18.37	tCCCAGAAGACCCAGggagtgg	x|||||||:xx||x|xxxxxxx	tGGGTCTTTGCGGGCgagatga	ARVCF
bta-miR-193a-5p	ENSBTAT00000061101	ENSBTAG00000001473	881	902	-18.37	tCCCAGAAGACCCAGggagtgg	x|||||||:xx||x|xxxxxxx	tGGGTCTTTGCGGGCgagatga	ARVCF
bta-miR-671	ENSBTAT00000001929	ENSBTAG00000001473	321	344	-30.92	tCCTTCGGGGACGTCGGAGACCcg	x||||||||x||x||xxx||||xx	aGGAAGCCC-TGGAGGGGCTGGag	ARVCF
bta-miR-671	ENSBTAT00000061101	ENSBTAG00000001473	321	344	-30.92	tCCTTCGGGGACGTCGGAGACCcg	x||||||||x||x||xxx||||xx	aGGAAGCCC-TGGAGGGGCTGGag	ARVCF
bta-miR-6535	ENSBTAT00000001929	ENSBTAG00000001473	128	149	-22.56	cTCCCCCTCCGCGGCgggtcgg	x||||||||xx|::|xxxxxxx	tAGGGGGAGCGGTTGgaggact	ARVCF
bta-miR-6535	ENSBTAT00000061101	ENSBTAG00000001473	128	149	-22.56	cTCCCCCTCCGCGGCgggtcgg	x||||||||xx|::|xxxxxxx	tAGGGGGAGCGGTTGgaggact	ARVCF
bta-miR-320a	ENSBTAT00000069288	ENSBTAG00000001475	828	845	-20.04	gTTTCGACT----TCTTCCGgt	x|||||||:xxxx|||:|||xx	aAAAGCTGGGTTGAGAGGGCga	MCUR1
bta-miR-143	ENSBTAT00000069288	ENSBTAG00000001475	175	195	-14.32	tCTCTACTTTCTT-TGTCAAca	x||||||||:x|xx::||x|xx	tGAGATGAAGCACTGTAGCTcg	MCUR1
bta-miR-2335	ENSBTAT00000069288	ENSBTAG00000001475	544	565	-13.85	tCTATTACCTTTGGTTttcctt	x|||||||xx:||:||xxxxxx	aGATAATGATGACTAActgaat	MCUR1
bta-miR-6119-5p	ENSBTAT00000069288	ENSBTAG00000001475	1046	1066	-12.37	tCTCCATTCC--AGTGATACTct	x|||||||xxxx|::x|x|||xx	aGAGGTAAAAAATTGATTTGAct	MCUR1
bta-miR-6535	ENSBTAT00000069288	ENSBTAG00000001475	674	696	-24.66	tTCCCCCTTCTTCCGTCTTCTtc	x|||||||x|x:|x::||:||xx	tAGGGGGA-GCGGTTGGAGGAct	MCUR1
bta-miR-2303	ENSBTAT00000001935	ENSBTAG00000001478	10	28	-19.28	aGACTTAC-ACA-CTGAaacc	x|||||||x|||x||||xxxx	tCTGAATGATGTCGACTgatg	DESI2
bta-miR-2303	ENSBTAT00000052383	ENSBTAG00000001478	10	28	-19.28	aGACTTAC-ACA-CTGAaacc	x|||||||x|||x||||xxxx	tCTGAATGATGTCGACTgatg	DESI2
bta-miR-320a	ENSBTAT00000068363	ENSBTAG00000001483	1082	1103	-12.35	gTTTCGACTTAAATTaaaaatt	x|||||||::||x|:xxxxxxx	aAAAGCTGGGTTGAGagggcga	SRGAP2
bta-miR-320a	ENSBTAT00000077712	ENSBTAG00000001483	1082	1103	-12.35	gTTTCGACTTAAATTaaaaatt	x|||||||::||x|:xxxxxxx	aAAAGCTGGGTTGAGagggcga	SRGAP2
bta-miR-320a	ENSBTAT00000081137	ENSBTAG00000001483	1471	1492	-12.35	gTTTCGACTTAAATTaaaaatt	x|||||||::||x|:xxxxxxx	aAAAGCTGGGTTGAGagggcga	SRGAP2
bta-miR-31	ENSBTAT00000068363	ENSBTAG00000001483	104	122	-16.7	tCCGTTCT-TG-TTGAATCtt	x|||||||x:|x::|x|||xx	aGGCAAGATGCTGGCATAGct	SRGAP2
bta-miR-31	ENSBTAT00000077712	ENSBTAG00000001483	104	122	-16.7	tCCGTTCT-TG-TTGAATCtt	x|||||||x:|x::|x|||xx	aGGCAAGATGCTGGCATAGct	SRGAP2
bta-miR-31	ENSBTAT00000081137	ENSBTAG00000001483	493	511	-16.7	tCCGTTCT-TG-TTGAATCtt	x|||||||x:|x::|x|||xx	aGGCAAGATGCTGGCATAGct	SRGAP2
bta-miR-191	ENSBTAT00000068363	ENSBTAG00000001483	629	651	-13.45	aTTGCCTTTGTCTCTggggacca	x|||||||x|xx|x|xxxxxxxx	cAACGGAATCCCAAAagcagctg	SRGAP2
bta-miR-191	ENSBTAT00000077712	ENSBTAG00000001483	629	651	-13.45	aTTGCCTTTGTCTCTggggacca	x|||||||x|xx|x|xxxxxxxx	cAACGGAATCCCAAAagcagctg	SRGAP2
bta-miR-191	ENSBTAT00000081137	ENSBTAG00000001483	1018	1040	-13.45	aTTGCCTTTGTCTCTggggacca	x|||||||x|xx|x|xxxxxxxx	cAACGGAATCCCAAAagcagctg	SRGAP2
bta-miR-342	ENSBTAT00000068363	ENSBTAG00000001483	2246	2270	-15.54	tGAGTGTGTgacagatcaggcacta	x||||||||xxxxxxxxxxxxxxxx	tCTCACACAgaaatcgcacccatct	SRGAP2
bta-miR-342	ENSBTAT00000077712	ENSBTAG00000001483	2246	2270	-15.54	tGAGTGTGTgacagatcaggcacta	x||||||||xxxxxxxxxxxxxxxx	tCTCACACAgaaatcgcacccatct	SRGAP2
bta-miR-342	ENSBTAT00000081137	ENSBTAG00000001483	2635	2659	-15.54	tGAGTGTGTgacagatcaggcacta	x||||||||xxxxxxxxxxxxxxxx	tCTCACACAgaaatcgcacccatct	SRGAP2
bta-miR-143	ENSBTAT00000068363	ENSBTAG00000001483	1700	1718	-15.08	tCTCTACTGA-TGG--TCGAag	x|||||||xxx||:xx||||xx	tGAGATGAAGCACTGTAGCTcg	SRGAP2
bta-miR-143	ENSBTAT00000077712	ENSBTAG00000001483	1700	1718	-15.08	tCTCTACTGA-TGG--TCGAag	x|||||||xxx||:xx||||xx	tGAGATGAAGCACTGTAGCTcg	SRGAP2
bta-miR-143	ENSBTAT00000081137	ENSBTAG00000001483	2089	2107	-15.08	tCTCTACTGA-TGG--TCGAag	x|||||||xxx||:xx||||xx	tGAGATGAAGCACTGTAGCTcg	SRGAP2
bta-miR-769	ENSBTAT00000068363	ENSBTAG00000001483	1157	1178	-18.89	tCTCTGGAGcatcttactgggt	x||||||||xxxxxxxxxxxxx	tGAGACCTCcgggttctgagct	SRGAP2
bta-miR-769	ENSBTAT00000077712	ENSBTAG00000001483	1157	1178	-18.89	tCTCTGGAGcatcttactgggt	x||||||||xxxxxxxxxxxxx	tGAGACCTCcgggttctgagct	SRGAP2
bta-miR-769	ENSBTAT00000081137	ENSBTAG00000001483	1546	1567	-18.89	tCTCTGGAGcatcttactgggt	x||||||||xxxxxxxxxxxxx	tGAGACCTCcgggttctgagct	SRGAP2
bta-miR-2303	ENSBTAT00000068363	ENSBTAG00000001483	1619	1640	-17.79	aGACTTACCGTTGGGTGATaga	x|||||||x::x:|x|||:xxx	tCTGAATGATG-TCGACTGatg	SRGAP2
bta-miR-2303	ENSBTAT00000077712	ENSBTAG00000001483	1619	1640	-17.79	aGACTTACCGTTGGGTGATaga	x|||||||x::x:|x|||:xxx	tCTGAATGATG-TCGACTGatg	SRGAP2
bta-miR-2303	ENSBTAT00000081137	ENSBTAG00000001483	2008	2029	-17.79	aGACTTACCGTTGGGTGATaga	x|||||||x::x:|x|||:xxx	tCTGAATGATG-TCGACTGatg	SRGAP2
bta-miR-2408	ENSBTAT00000068363	ENSBTAG00000001483	519	539	-20.47	gTGCACACACACacacacaca	x|||||||||x|xxxxxxxxx	cACGTGTGTGAGctcagccgg	SRGAP2
bta-miR-2408	ENSBTAT00000077712	ENSBTAG00000001483	519	539	-20.47	gTGCACACACACacacacaca	x|||||||||x|xxxxxxxxx	cACGTGTGTGAGctcagccgg	SRGAP2
bta-miR-2408	ENSBTAT00000081137	ENSBTAG00000001483	908	928	-20.47	gTGCACACACACacacacaca	x|||||||||x|xxxxxxxxx	cACGTGTGTGAGctcagccgg	SRGAP2
bta-miR-3432a	ENSBTAT00000068363	ENSBTAG00000001483	1802	1825	-22.95	aCGCCCTACTAAAAGGACTACggc	x|||||||xx|||xx:||x||xxx	tGCGGGATC-TTTAGTTG-TGgtg	SRGAP2
bta-miR-3432a	ENSBTAT00000077712	ENSBTAG00000001483	1802	1825	-22.95	aCGCCCTACTAAAAGGACTACggc	x|||||||xx|||xx:||x||xxx	tGCGGGATC-TTTAGTTG-TGgtg	SRGAP2
bta-miR-3432a	ENSBTAT00000081137	ENSBTAG00000001483	2191	2214	-22.95	aCGCCCTACTAAAAGGACTACggc	x|||||||xx|||xx:||x||xxx	tGCGGGATC-TTTAGTTG-TGgtg	SRGAP2
bta-miR-10162-5p	ENSBTAT00000068363	ENSBTAG00000001483	1913	1935	-28.79	tCCTGTCCGGTGGTGTGTCTCgt	x||||||||||xxx|:|x|x|xx	tGGACAGGCCAAGCCGCTGTGca	SRGAP2
bta-miR-10162-5p	ENSBTAT00000077712	ENSBTAG00000001483	1913	1935	-28.79	tCCTGTCCGGTGGTGTGTCTCgt	x||||||||||xxx|:|x|x|xx	tGGACAGGCCAAGCCGCTGTGca	SRGAP2
bta-miR-10162-5p	ENSBTAT00000081137	ENSBTAG00000001483	2302	2324	-28.79	tCCTGTCCGGTGGTGTGTCTCgt	x||||||||||xxx|:|x|x|xx	tGGACAGGCCAAGCCGCTGTGca	SRGAP2
bta-miR-181b	ENSBTAT00000001944	ENSBTAG00000001485	1466	1487	-11.42	aTGTAAGT--TGACAaatgttttg	x|||||||xx:||||xxxxxxxxx	aACATTCATTGCTGTcggtgggtt	PPIP5K2
bta-miR-181c	ENSBTAT00000001944	ENSBTAG00000001485	1465	1487	-13.62	aTGTAAGTTG-ACAAATGTTTtgt	x|||||||||x|||xx:::|:xxx	aACATTCAACCTGTCGGTGAGttt	PPIP5K2
bta-miR-2370-5p	ENSBTAT00000001944	ENSBTAG00000001485	1096	1117	-12.51	cCCCTTTTATTcgtggttccta	x||||||||:|xxxxxxxxxxx	tGGGAAAATGAaagttggttat	PPIP5K2
bta-miR-497	ENSBTAT00000001948	ENSBTAG00000001489	8	30	-19.75	tTCGTCGTGGAAACACTGTAaaa	x||||||||xx|x|||::x|xxx	cAGCAGCACACT-GTGGTTTgta	TUBA1A
bta-miR-181b	ENSBTAT00000052818	ENSBTAG00000001497	2118	2141	-20.28	aTGTAAGTGTCGATTCCCGaagta	x|||||||:x|||:xx||:xxxxx	aACATTCATTGCTGTCGGTgggtt	MRAS
bta-miR-193a-5p	ENSBTAT00000052818	ENSBTAG00000001497	2902	2929	-25.09	aCCCAGAACAGAGGACCCTTGCCCTctg	x|||||||xxxxxx||x|::||x||xxx	tGGGTCTT------TGCGGGCGAGAtga	MRAS
bta-miR-181c	ENSBTAT00000052818	ENSBTAG00000001497	2117	2141	-13.35	aTGTAAGTGTCGATTCCCGaagtaa	x|||||||x|x||:xx||:xxxxxx	aACATTCA-ACCTGTCGGTgagttt	MRAS
bta-miR-200a	ENSBTAT00000052818	ENSBTAG00000001497	3094	3117	-15.82	aTTGTGACACAGTATCTTCGACcc	x||||||||x|x:||x|x|x||xx	tAACACTGTCTGGTA-ACGATGtt	MRAS
bta-miR-30a-5p	ENSBTAT00000052358	ENSBTAG00000001497	664	690	-13.52	cCATTTGTGTAGAGAGAAGAgaggtca	x|||||||xx||x|||xx||xxxxxxx	tGTAAACA--TC-CTCGACTggaagct	MRAS
bta-miR-30a-5p	ENSBTAT00000052818	ENSBTAG00000001497	664	690	-13.52	cCATTTGTGTAGAGAGAAGAgaggtca	x|||||||xx||x|||xx||xxxxxxx	tGTAAACA--TC-CTCGACTggaagct	MRAS
bta-miR-30a-5p	ENSBTAT00000069218	ENSBTAG00000001497	664	690	-13.52	cCATTTGTGTAGAGAGAAGAgaggtca	x|||||||xx||x|||xx||xxxxxxx	tGTAAACA--TC-CTCGACTggaagct	MRAS
bta-miR-30a-5p	ENSBTAT00000069374	ENSBTAG00000001497	664	690	-13.52	cCATTTGTGTAGAGAGAAGAgaggtca	x|||||||xx||x|||xx||xxxxxxx	tGTAAACA--TC-CTCGACTggaagct	MRAS
bta-miR-497	ENSBTAT00000052818	ENSBTAG00000001497	1309	1329	-25.17	gTCGTCGTG-GACTCTccgtcc	x||||||||x|||x|:xxxxxx	cAGCAGCACACTGTGGtttgta	MRAS
bta-miR-144	ENSBTAT00000052358	ENSBTAG00000001497	1029	1051	-10.7	tTGTCATAACCTAGTAAAaacca	x|||||||x|x||x||x|xxxxx	tACAGTATAG-ATGATGTactag	MRAS
bta-miR-144	ENSBTAT00000052818	ENSBTAG00000001497	1029	1051	-10.7	tTGTCATAACCTAGTAAAaacca	x|||||||x|x||x||x|xxxxx	tACAGTATAG-ATGATGTactag	MRAS
bta-miR-144	ENSBTAT00000069218	ENSBTAG00000001497	1029	1051	-10.7	tTGTCATAACCTAGTAAAaacca	x|||||||x|x||x||x|xxxxx	tACAGTATAG-ATGATGTactag	MRAS
bta-miR-144	ENSBTAT00000069374	ENSBTAG00000001497	1029	1051	-10.7	tTGTCATAACCTAGTAAAaacca	x|||||||x|x||x||x|xxxxx	tACAGTATAG-ATGATGTactag	MRAS
bta-miR-183	ENSBTAT00000052818	ENSBTAG00000001497	2177	2199	-16.59	cTACCGTGCCGGGATCAAccccc	x|||||||x|x:xx|x||xxxxx	tATGGCACTGGTAGAATTcactg	MRAS
bta-miR-30f	ENSBTAT00000052358	ENSBTAG00000001497	666	690	-17.61	cCATTTGTGTAGAGAGAAGAGaggt	x||||||||xx:x|x||x|||xxxx	tGTAAACACCCTACACT-CTCagct	MRAS
bta-miR-30f	ENSBTAT00000052818	ENSBTAG00000001497	666	690	-17.61	cCATTTGTGTAGAGAGAAGAGaggt	x||||||||xx:x|x||x|||xxxx	tGTAAACACCCTACACT-CTCagct	MRAS
bta-miR-30f	ENSBTAT00000069218	ENSBTAG00000001497	666	690	-17.61	cCATTTGTGTAGAGAGAAGAGaggt	x||||||||xx:x|x||x|||xxxx	tGTAAACACCCTACACT-CTCagct	MRAS
bta-miR-30f	ENSBTAT00000069374	ENSBTAG00000001497	666	690	-17.61	cCATTTGTGTAGAGAGAAGAGaggt	x||||||||xx:x|x||x|||xxxx	tGTAAACACCCTACACT-CTCagct	MRAS
bta-miR-671	ENSBTAT00000052818	ENSBTAG00000001497	2418	2440	-17.35	aCCTTCGGCAgtgacggggttct	x|||||||x|xxxxxxxxxxxxx	aGGAAGCCCTggaggggctggag	MRAS
bta-miR-2303	ENSBTAT00000052818	ENSBTAG00000001497	1753	1772	-15.09	aGACTTACGG-ACTCGAGTta	x|||||||x:x|x:x||x|xx	tCTGAATGATGTCGACTGAtg	MRAS
bta-miR-2370-5p	ENSBTAT00000052358	ENSBTAG00000001497	1069	1090	-17.04	tCCCTTTTACCGAAATCCAGaa	x|||||||||xxxx|x|||:xx	tGGGAAAATGAAAGTTGGTTat	MRAS
bta-miR-2370-5p	ENSBTAT00000052818	ENSBTAG00000001497	1069	1090	-17.04	tCCCTTTTACCGAAATCCAGaa	x|||||||||xxxx|x|||:xx	tGGGAAAATGAAAGTTGGTTat	MRAS
bta-miR-2370-5p	ENSBTAT00000069218	ENSBTAG00000001497	1069	1090	-17.04	tCCCTTTTACCGAAATCCAGaa	x|||||||||xxxx|x|||:xx	tGGGAAAATGAAAGTTGGTTat	MRAS
bta-miR-2370-5p	ENSBTAT00000069374	ENSBTAG00000001497	1069	1090	-17.04	tCCCTTTTACCGAAATCCAGaa	x|||||||||xxxx|x|||:xx	tGGGAAAATGAAAGTTGGTTat	MRAS
bta-miR-1949	ENSBTAT00000052818	ENSBTAG00000001497	1312	1334	-17.79	gTATGGTCGTCGTGGAC-TCTCcg	x|||||||x|x::||x|x|x||xx	tATACCAGGA-TGCCAGCATAGtt	MRAS
bta-miR-1291	ENSBTAT00000001963	ENSBTAG00000001498	248	271	-17.83	cCCGGGACcagtgcccacccccac	x|||||||xxxxxxxxxxxxxxxx	tGGCCCTGactgaagacctgcagt	CYTH2
bta-miR-1291	ENSBTAT00000080957	ENSBTAG00000001498	248	271	-17.83	cCCGGGACcagtgcccacccccac	x|||||||xxxxxxxxxxxxxxxx	tGGCCCTGactgaagacctgcagt	CYTH2
bta-miR-1291	ENSBTAT00000084376	ENSBTAG00000001498	248	271	-17.83	cCCGGGACcagtgcccacccccac	x|||||||xxxxxxxxxxxxxxxx	tGGCCCTGactgaagacctgcagt	CYTH2
bta-miR-2332	ENSBTAT00000067002	ENSBTAG00000001499	1	23	-12.27	aCCAAATTCAAGTACagtaaaat-	x||||||||x||x||xxxxxxxxx	cGGTTTAAGGTCTTGgagacaaag	TRIM33
bta-miR-6119-3p	ENSBTAT00000067002	ENSBTAG00000001499	203	229	-13.31	aGTTTAGTAAAGTGAAACTGAAAacaa	x||||||||||xxx|||x|||x|xxxx	gCAAATCATTT---TTT-ACTCTccaa	TRIM33
bta-miR-200a	ENSBTAT00000044320	ENSBTAG00000001504	787	809	-18.23	gTTGTGACGGATgtcgaggtgtc	x|||||||:||:xxxxxxxxxxx	tAACACTGTCTGgtaacgatgtt	NOP14
bta-miR-144	ENSBTAT00000044320	ENSBTAG00000001504	16	37	-12.11	aTGTCATAgaggaacagaaaaa	x|||||||xxxxxxxxxxxxxx	tACAGTATagatgatgtactag	NOP14
bta-miR-106a	ENSBTAT00000001974	ENSBTAG00000001509	100	125	-17.24	tTTTCACGTTTGGTTTAATTGTCTgc	x|||||||xx||xx|:|xx:|||:xx	aAAAGTGCTTAC--AGT--GCAGGta	ELK3
bta-miR-497	ENSBTAT00000077282	ENSBTAG00000001510	310	327	-14.11	aTCGTCGT----TACTAAGgcg	x|||||||xxxx:||:||:xxx	cAGCAGCACACTGTGGTTTgta	CDK17
bta-miR-2332	ENSBTAT00000077282	ENSBTAG00000001510	790	815	-13.23	aCCAAATTGATTTAATTTCGTGTTac	x|||||||xx:xx||::||x||||xx	cGGTTTAAG-GTCTTGGAG-ACAAag	CDK17
bta-miR-6119-3p	ENSBTAT00000001981	ENSBTAG00000001512	574	597	-13.92	gGTTTAGTATGCCACTGAGAtttc	x||||||||x:xx|x|||||xxxx	gCAAATCATTTTTT-ACTCTccaa	ZFP64
bta-miR-1296	ENSBTAT00000078425	ENSBTAG00000001518	959	980	-16.74	cATCCCGGCTCTTCCGTCGtct	x|||||||xx|:xxx||x|xxx	tTAGGGCCCTGGCTCCATCtcc	ISG20L2
bta-miR-2370-5p	ENSBTAT00000001989	ENSBTAG00000001518	309	329	-11.93	aCCCTTTT-CTGTAAAgggtca	x|||||||x||x|x||xxxxxx	tGGGAAAATGAAAGTTggttat	ISG20L2
bta-miR-2370-5p	ENSBTAT00000078425	ENSBTAG00000001518	309	329	-11.93	aCCCTTTT-CTGTAAAgggtca	x|||||||x||x|x||xxxxxx	tGGGAAAATGAAAGTTggttat	ISG20L2
bta-miR-6119-5p	ENSBTAT00000001989	ENSBTAG00000001518	212	234	-15.19	tCTCCATTTgccgggcccccacc	x||||||||xxxxxxxxxxxxxx	aGAGGTAAAaaattgatttgact	ISG20L2
bta-miR-6119-5p	ENSBTAT00000078425	ENSBTAG00000001518	212	234	-15.19	tCTCCATTTgccgggcccccacc	x||||||||xxxxxxxxxxxxxx	aGAGGTAAAaaattgatttgact	ISG20L2
bta-miR-181b	ENSBTAT00000001994	ENSBTAG00000001522	1	18	-10.32	tTGTAAGTAGTttttgat------	x||||||||::xxxxxxxxxxxxx	aACATTCATTGctgtcggtgggtt	MTERF3
bta-miR-148a	ENSBTAT00000001995	ENSBTAG00000001523	626	644	-13.44	tGTCACGTAATAT---GAAAgt	x|||||||x||x|xxx||||xx	tCAGTGCACTACAGAACTTTgt	YES1
bta-miR-148a	ENSBTAT00000070883	ENSBTAG00000001523	626	644	-13.44	tGTCACGTAATAT---GAAAgt	x|||||||x||x|xxx||||xx	tCAGTGCACTACAGAACTTTgt	YES1
bta-miR-320a	ENSBTAT00000001995	ENSBTAG00000001523	2180	2200	-14.88	tTTTCGACA-ACCTTTTTTaga	x|||||||xx|x||:|:::xxx	aAAAGCTGGGTTGAGAGGGcga	YES1
bta-miR-106a	ENSBTAT00000001995	ENSBTAG00000001523	944	966	-15.56	tTTTCACGTAAGTTCAGGgacta	x|||||||x|x||x||x|xxxxx	aAAAGTGCTTACA-GTGCaggta	YES1
bta-miR-30e-5p	ENSBTAT00000001995	ENSBTAG00000001523	1791	1817	-18.68	gCATTTGTATTCTTCGGTGACGTTCaa	x||||||||xxxx:xxx||||x|||xx	tGTAAACATCCTTG---ACTGGAAGct	YES1
bta-miR-181c	ENSBTAT00000001995	ENSBTAG00000001523	2347	2370	-10.89	aTGTAAGTTactcttaaaaataaa	x||||||||xxxxxxxxxxxxxxx	aACATTCAAcctgtcggtgagttt	YES1
bta-miR-30a-5p	ENSBTAT00000001995	ENSBTAG00000001523	1791	1817	-20	gCATTTGTATTCTTCGGTGACGTTCaa	x||||||||xxxxxx|x||||x|||xx	tGTAAACATCCT---CGACTGGAAGct	YES1
bta-miR-143	ENSBTAT00000001995	ENSBTAG00000001523	3150	3170	-13.45	aCTCTACTTA-TAAATTAGAac	x||||||||xx|x|xx|x||xx	tGAGATGAAGCACTGTAGCTcg	YES1
bta-miR-146b	ENSBTAT00000001995	ENSBTAG00000001523	3003	3026	-18.29	aCTCTTGAATAAAGAGATgacata	x|||||||x|x|||xx||xxxxxx	tGAGAACTGAATTCCATAggctgt	YES1
bta-miR-152	ENSBTAT00000001995	ENSBTAG00000001523	623	644	-14.69	tGTCACGTAATATgaaagttta	x||||||||x|x|xxxxxxxxx	tCAGTGCATGACAgaacttggg	YES1
bta-miR-152	ENSBTAT00000070883	ENSBTAG00000001523	623	644	-14.69	tGTCACGTAATATgaaagttta	x||||||||x|x|xxxxxxxxx	tCAGTGCATGACAgaacttggg	YES1
bta-miR-30f	ENSBTAT00000001995	ENSBTAG00000001523	1791	1817	-13.21	gCATTTGTATTCTTCGGTGACGTTCaa	x|||||||xxxx|xxx||||x:x||xx	tGTAAACACCCTA---CACTCTCAGct	YES1
bta-miR-671	ENSBTAT00000001995	ENSBTAG00000001523	1216	1238	-20.41	cCCTTCGGAATTGAATCGATaaa	x|||||||x|::xxx:|||:xxx	aGGAAGCCCTGGAGGGGCTGgag	YES1
bta-miR-2370-5p	ENSBTAT00000001995	ENSBTAG00000001523	2913	2934	-17.32	tCCCTTTTTGTTTCGATTAtta	x|||||||xx||||:|::|xxx	tGGGAAAATGAAAGTTGGTtat	YES1
bta-miR-503-3p	ENSBTAT00000001995	ENSBTAG00000001523	634	655	-12.84	aCTCATAATTGTGTC-ACGtaat	x|||||||:x:x|x|x|||xxxx	gGAGTATTGTTTCTGCTGCccgg	YES1
bta-miR-503-3p	ENSBTAT00000070883	ENSBTAG00000001523	634	655	-12.84	aCTCATAATTGTGTC-ACGtaat	x|||||||:x:x|x|x|||xxxx	gGAGTATTGTTTCTGCTGCccgg	YES1
bta-miR-11991	ENSBTAT00000001995	ENSBTAG00000001523	2514	2533	-10.38	tACAAGACTTA-AATTtttct	x|||||||x||x||:|xxxxx	aTGTTCTGTATCTTGAttgta	YES1
bta-miR-1949	ENSBTAT00000001995	ENSBTAG00000001523	1551	1577	-19.38	tTATGGTCTGAAAACAGTCTGAGTCaa	x|||||||:x|xxx|x|||x|x:||xx	tATACCAGGAT---GCCAG-CATAGtt	YES1
bta-miR-320a	ENSBTAT00000002003	ENSBTAG00000001528	91	113	-15.3	aTTTCGACAACAACTTaattata	x|||||||xx|||||:xxxxxxx	aAAAGCTGG-GTTGAGagggcga	CDK13
bta-miR-200a	ENSBTAT00000002003	ENSBTAG00000001528	1481	1503	-10.08	tTTGTGACCAATAAATGgaaacc	x|||||||xx|:x|x||xxxxxx	tAACACTGTCTGGTAACgatgtt	CDK13
bta-miR-574	ENSBTAT00000002003	ENSBTAG00000001528	1422	1445	-20.3	aCTCACACGTGTTTTCTTGAACtg	x|||||||::::x:x||::x||xx	tGAGTGTGTGTGTGTGAGTGTGtg	CDK13
bta-miR-182	ENSBTAT00000002006	ENSBTAG00000001529	93	116	-11.92	tAACCGTTTTAGTTTTAGCTTTtg	x|||||||x:x:|:||x:x|x|xx	tTTGGCAATGGTAGAACTCACAct	NSD3
bta-miR-2408	ENSBTAT00000002006	ENSBTAG00000001529	1071	1088	-24.47	tTGCACAC-CT--AGTCGGtg	x|||||||x||xx||||||xx	cACGTGTGTGAGCTCAGCCgg	NSD3
bta-miR-2370-5p	ENSBTAT00000002010	ENSBTAG00000001533	485	506	-16.5	aCCCTTTTATGTATAAACAccg	x||||||||:x|x:||x||xxx	tGGGAAAATGAAAGTTGGTtat	HACE1
bta-miR-1949	ENSBTAT00000002010	ENSBTAG00000001533	387	409	-17.21	gTATGGTCCGACctataggatta	x||||||||x||xxxxxxxxxxx	tATACCAGGATGccagcatagtt	HACE1
bta-miR-6535	ENSBTAT00000002020	ENSBTAG00000001543	9	31	-35.03	cTCCCCCTCGGCCGGCCgaccga	x|||||||||x||::||xxxxxx	tAGGGGGAGC-GGTTGGaggact	BRI3BP
bta-miR-31	ENSBTAT00000072673	ENSBTAG00000001545	1233	1252	-13.7	cCCGTTCTTCT-CCACATTta	x|||||||x|xx||xx||:xx	aGGCAAGATGCTGGCATAGct	SLC34A2
bta-miR-31	ENSBTAT00000073125	ENSBTAG00000001545	1233	1252	-13.7	cCCGTTCTTCT-CCACATTta	x|||||||x|xx||xx||:xx	aGGCAAGATGCTGGCATAGct	SLC34A2
bta-miR-143	ENSBTAT00000072673	ENSBTAG00000001545	662	682	-18.51	tCTCTACTTGGT-AGAGGGAgt	x||||||||x||x|x|xx||xx	tGAGATGAAGCACTGTAGCTcg	SLC34A2
bta-miR-143	ENSBTAT00000073125	ENSBTAG00000001545	662	682	-18.51	tCTCTACTTGGT-AGAGGGAgt	x||||||||x||x|x|xx||xx	tGAGATGAAGCACTGTAGCTcg	SLC34A2
bta-miR-146b	ENSBTAT00000072673	ENSBTAG00000001545	1260	1284	-12.14	cCTCTTGATCCAAACAACTCCCAtt	x|||||||:xx||xxx|x|||x|xx	tGAGAACTGAATTCCAT-AGGCTgt	SLC34A2
bta-miR-146b	ENSBTAT00000073125	ENSBTAG00000001545	1260	1284	-12.14	cCTCTTGATCCAAACAACTCCCAtt	x|||||||:xx||xxx|x|||x|xx	tGAGAACTGAATTCCAT-AGGCTgt	SLC34A2
bta-miR-1291	ENSBTAT00000072673	ENSBTAG00000001545	1669	1695	-21.24	gCCGGGACGGGTCCAAATTGCATGTat	x|||||||x|::xxxxx:||x|:||xx	tGGCCCTGACTGAA---GACCTGCAgt	SLC34A2
bta-miR-1291	ENSBTAT00000073125	ENSBTAG00000001545	1669	1695	-21.24	gCCGGGACGGGTCCAAATTGCATGTat	x|||||||x|::xxxxx:||x|:||xx	tGGCCCTGACTGAA---GACCTGCAgt	SLC34A2
bta-miR-1296	ENSBTAT00000002023	ENSBTAG00000001545	18	38	-27.87	tATCCCGGGAG-GAGGggcgag	x|||||||||xx||||xxxxxx	tTAGGGCCCTGGCTCCatctcc	SLC34A2
bta-miR-1296	ENSBTAT00000072673	ENSBTAG00000001545	18	38	-27.87	tATCCCGGGAG-GAGGggcgag	x|||||||||xx||||xxxxxx	tTAGGGCCCTGGCTCCatctcc	SLC34A2
bta-miR-1296	ENSBTAT00000073125	ENSBTAG00000001545	18	38	-27.87	tATCCCGGGAG-GAGGggcgag	x|||||||||xx||||xxxxxx	tTAGGGCCCTGGCTCCatctcc	SLC34A2
bta-miR-2332	ENSBTAT00000072673	ENSBTAG00000001545	1660	1684	-11.15	tCCAAATTGCATGTATAAATGTata	x|||||||x||x|x|:xxx|||xxx	cGGTTTAAGGT-CTTGGAGACAaag	SLC34A2
bta-miR-2332	ENSBTAT00000073125	ENSBTAG00000001545	1660	1684	-11.15	tCCAAATTGCATGTATAAATGTata	x|||||||x||x|x|:xxx|||xxx	cGGTTTAAGGT-CTTGGAGACAaag	SLC34A2
bta-miR-2370-5p	ENSBTAT00000072673	ENSBTAG00000001545	541	562	-11.87	tCCCTTTTTCcggtgtggttta	x|||||||x|xxxxxxxxxxxx	tGGGAAAATGaaagttggttat	SLC34A2
bta-miR-2370-5p	ENSBTAT00000073125	ENSBTAG00000001545	541	562	-11.87	tCCCTTTTTCcggtgtggttta	x|||||||x|xxxxxxxxxxxx	tGGGAAAATGaaagttggttat	SLC34A2
bta-miR-6119-3p	ENSBTAT00000072673	ENSBTAG00000001545	1511	1534	-13.94	tGTTTAGTGTCATGATGAatgata	x|||||||:xx|x:||||xxxxxx	gCAAATCATTTT-TTACTctccaa	SLC34A2
bta-miR-6119-3p	ENSBTAT00000073125	ENSBTAG00000001545	1511	1534	-13.94	tGTTTAGTGTCATGATGAatgata	x|||||||:xx|x:||||xxxxxx	gCAAATCATTTT-TTACTctccaa	SLC34A2
bta-miR-10162-5p	ENSBTAT00000072673	ENSBTAG00000001545	1336	1358	-16.95	tCCTGTCCcagaccctcgtgtgc	x|||||||xxxxxxxxxxxxxxx	tGGACAGGccaagccgctgtgca	SLC34A2
bta-miR-10162-5p	ENSBTAT00000073125	ENSBTAG00000001545	1336	1358	-16.95	tCCTGTCCcagaccctcgtgtgc	x|||||||xxxxxxxxxxxxxxx	tGGACAGGccaagccgctgtgca	SLC34A2
bta-miR-31	ENSBTAT00000002024	ENSBTAG00000001546	969	989	-17.78	tCCGTTCTCTGTTTTTGTgtg	x|||||||x:|x::x|:|xxx	aGGCAAGATGCTGGCATAgct	MGAT1
bta-miR-31	ENSBTAT00000066191	ENSBTAG00000001546	969	989	-17.78	tCCGTTCTCTGTTTTTGTgtg	x|||||||x:|x::x|:|xxx	aGGCAAGATGCTGGCATAgct	MGAT1
bta-miR-342	ENSBTAT00000002024	ENSBTAG00000001546	847	871	-19.28	gGAGTGTGACTCTCCCGGAGGTttt	x|||||||x||x|xx||xx|||xxx	tCTCACACAGAAATCGCACCCAtct	MGAT1
bta-miR-342	ENSBTAT00000066191	ENSBTAG00000001546	847	871	-19.28	gGAGTGTGACTCTCCCGGAGGTttt	x|||||||x||x|xx||xx|||xxx	tCTCACACAGAAATCGCACCCAtct	MGAT1
bta-miR-143	ENSBTAT00000002024	ENSBTAG00000001546	578	599	-11.11	tCTCTACTTTCTctccccttct	x||||||||:x|xxxxxxxxxx	tGAGATGAAGCActgtagctcg	MGAT1
bta-miR-143	ENSBTAT00000066191	ENSBTAG00000001546	578	599	-11.11	tCTCTACTTTCTctccccttct	x||||||||:x|xxxxxxxxxx	tGAGATGAAGCActgtagctcg	MGAT1
bta-miR-146b	ENSBTAT00000002024	ENSBTAG00000001546	316	339	-15.39	tCTCTTGATTTCAACAGTTGGAga	x|||||||:||x|xxx:|:x||xx	tGAGAACTGAATTCCATAGGCTgt	MGAT1
bta-miR-146b	ENSBTAT00000066191	ENSBTAG00000001546	316	339	-15.39	tCTCTTGATTTCAACAGTTGGAga	x|||||||:||x|xxx:|:x||xx	tGAGAACTGAATTCCATAGGCTgt	MGAT1
bta-miR-2303	ENSBTAT00000002024	ENSBTAG00000001546	137	158	-14.43	gGACTTACGGTGAGCctttttc	x|||||||x::x|||xxxxxxx	tCTGAATGATG-TCGactgatg	MGAT1
bta-miR-2303	ENSBTAT00000066191	ENSBTAG00000001546	137	158	-14.43	gGACTTACGGTGAGCctttttc	x|||||||x::x|||xxxxxxx	tCTGAATGATG-TCGactgatg	MGAT1
bta-miR-2370-5p	ENSBTAT00000002024	ENSBTAG00000001546	339	359	-15.31	tCCCTTTT-CTCCGGACTAGtt	x|||||||x||xxx:||:|:xx	tGGGAAAATGAAAGTTGGTTat	MGAT1
bta-miR-2370-5p	ENSBTAT00000066191	ENSBTAG00000001546	339	359	-15.31	tCCCTTTT-CTCCGGACTAGtt	x|||||||x||xxx:||:|:xx	tGGGAAAATGAAAGTTGGTTat	MGAT1
bta-miR-10162-5p	ENSBTAT00000002024	ENSBTAG00000001546	386	408	-15.89	cCCTGTCCATGTCctcctcccga	x|||||||xxx||xxxxxxxxxx	tGGACAGGCCAAGccgctgtgca	MGAT1
bta-miR-10162-5p	ENSBTAT00000066191	ENSBTAG00000001546	386	408	-15.89	cCCTGTCCATGTCctcctcccga	x|||||||xxx||xxxxxxxxxx	tGGACAGGCCAAGccgctgtgca	MGAT1
bta-miR-10a	ENSBTAT00000002028	ENSBTAG00000001548	345	367	-12.22	cTGGGACAagattatttcgtctg	x|||||||xxxxxxxxxxxxxxx	tACCCTGTagatccgaatttgtg	UBQLN4
bta-let-7d	ENSBTAT00000002028	ENSBTAG00000001548	1787	1806	-16.03	cCTCCATC--CCTCCCTTTCgg	x|||||||xx||xx|x|x||xx	aGAGGTAGTAGGTTGCATAGtt	UBQLN4
bta-miR-192	ENSBTAT00000002028	ENSBTAG00000001548	1346	1367	-22.13	gACTGGAT-CTgtccgggaaggc	x|||||||x||xxxxxxxxxxxx	cTGACCTATGAattgacagccag	UBQLN4
bta-let-7g	ENSBTAT00000002028	ENSBTAG00000001548	1785	1806	-10.76	cCTCCATCcctccctttcggtg	x|||||||xxxxxxxxxxxxxx	tGAGGTAGtagtttgtacagtt	UBQLN4
bta-miR-10b	ENSBTAT00000002028	ENSBTAG00000001548	345	367	-12.22	cTGGGACAAGATTATTTcgtctg	x|||||||xxx|xx:||xxxxxx	tACCCTGTAGAACCGAAtttgtg	UBQLN4
bta-let-7a-5p	ENSBTAT00000002028	ENSBTAG00000001548	1787	1806	-14	cCTCCATC--CCTCCCTTTCgg	x|||||||xx||xx|x|x||xx	tGAGGTAGTAGGTTGTATAGtt	UBQLN4
bta-let-7b	ENSBTAT00000002028	ENSBTAG00000001548	1784	1806	-13.94	cCTCCATCCCTCCctttcggtgt	x|||||||xx|||xxxxxxxxxx	tGAGGTAGT-AGGttgtgtggtt	UBQLN4
bta-let-7e	ENSBTAT00000002028	ENSBTAG00000001548	1785	1806	-18.62	cCTCCATCCCTCCctttcggtg	x||||||||x|||xxxxxxxxx	tGAGGTAGG-AGGttgtatagt	UBQLN4
bta-miR-6535	ENSBTAT00000002028	ENSBTAG00000001548	576	597	-22.62	gTCCCCCTTGTTcgtagaagga	x|||||||:|::xxxxxxxxxx	tAGGGGGAGCGGttggaggact	UBQLN4
bta-miR-182	ENSBTAT00000063605	ENSBTAG00000001551	566	590	-10.61	tAACCGTTTATTACTTTacacatgt	x|||||||x|::|x:||xxxxxxxx	tTTGGCAA-TGGTAGAActcacact	PLEKHG3
bta-miR-1291	ENSBTAT00000063605	ENSBTAG00000001551	288	311	-21.63	cCCGGGACccagaccgtcaccggt	x|||||||xxxxxxxxxxxxxxxx	tGGCCCTGactgaagacctgcagt	PLEKHG3
bta-miR-2408	ENSBTAT00000063605	ENSBTAG00000001551	427	449	-21.05	gTGCACACGTGCTCTTGTgattg	x|||||||:xx|||xx||xxxxx	cACGTGTGT--GAGCTCAgccgg	PLEKHG3
bta-miR-342	ENSBTAT00000002038	ENSBTAG00000001552	323	347	-13.44	aGAGTGTGagaaacaacgttaaata	x|||||||xxxxxxxxxxxxxxxxx	tCTCACACagaaatcgcacccatct	EPC1
bta-miR-342	ENSBTAT00000068086	ENSBTAG00000001552	323	347	-13.44	aGAGTGTGagaaacaacgttaaata	x|||||||xxxxxxxxxxxxxxxxx	tCTCACACagaaatcgcacccatct	EPC1
bta-miR-342	ENSBTAT00000072354	ENSBTAG00000001552	323	347	-13.44	aGAGTGTGagaaacaacgttaaata	x|||||||xxxxxxxxxxxxxxxxx	tCTCACACagaaatcgcacccatct	EPC1
bta-miR-342	ENSBTAT00000079025	ENSBTAG00000001552	323	347	-13.44	aGAGTGTGagaaacaacgttaaata	x|||||||xxxxxxxxxxxxxxxxx	tCTCACACagaaatcgcacccatct	EPC1
bta-miR-342	ENSBTAT00000081660	ENSBTAG00000001552	323	347	-13.44	aGAGTGTGagaaacaacgttaaata	x|||||||xxxxxxxxxxxxxxxxx	tCTCACACagaaatcgcacccatct	EPC1
bta-miR-143	ENSBTAT00000002038	ENSBTAG00000001552	121	141	-26.09	tCTCTACT-CGTGACGACagct	x|||||||x||||||:x|xxxx	tGAGATGAAGCACTGTAGctcg	EPC1
bta-miR-143	ENSBTAT00000068086	ENSBTAG00000001552	121	141	-26.09	tCTCTACT-CGTGACGACagct	x|||||||x||||||:x|xxxx	tGAGATGAAGCACTGTAGctcg	EPC1
bta-miR-143	ENSBTAT00000072354	ENSBTAG00000001552	121	141	-26.09	tCTCTACT-CGTGACGACagct	x|||||||x||||||:x|xxxx	tGAGATGAAGCACTGTAGctcg	EPC1
bta-miR-143	ENSBTAT00000079025	ENSBTAG00000001552	121	141	-26.09	tCTCTACT-CGTGACGACagct	x|||||||x||||||:x|xxxx	tGAGATGAAGCACTGTAGctcg	EPC1
bta-miR-143	ENSBTAT00000081660	ENSBTAG00000001552	121	141	-26.09	tCTCTACT-CGTGACGACagct	x|||||||x||||||:x|xxxx	tGAGATGAAGCACTGTAGctcg	EPC1
bta-miR-1291	ENSBTAT00000002033	ENSBTAG00000001553	91	114	-22.68	tCCGGGACGGtggtgacacgaacc	x|||||||x|xxxxxxxxxxxxxx	tGGCCCTGACtgaagacctgcagt	HNRNPA1
bta-miR-2335	ENSBTAT00000002033	ENSBTAG00000001553	678	699	-10.98	aCTATTACCTACT-ATGTGTTcg	x|||||||x||||x||xx::|xx	aGATAATG-ATGACTAACTGAat	HNRNPA1
bta-miR-503-3p	ENSBTAT00000002033	ENSBTAG00000001553	129	151	-16.23	aCTCATAACAGAttttgtacaga	x|||||||||:|xxxxxxxxxxx	gGAGTATTGTTTctgctgcccgg	HNRNPA1
bta-miR-31	ENSBTAT00000082210	ENSBTAG00000001564	315	335	-17.04	tCCGTTCTTTGcagacaacga	x|||||||x:|xxxxxxxxxx	aGGCAAGATGCtggcatagct	PDE4DIP
bta-miR-31	ENSBTAT00000082827	ENSBTAG00000001564	315	335	-17.04	tCCGTTCTTTGcagacaacga	x|||||||x:|xxxxxxxxxx	aGGCAAGATGCtggcatagct	PDE4DIP
bta-miR-10a	ENSBTAT00000082210	ENSBTAG00000001564	207	229	-15.08	gTGGGACAgaacaataaggagtt	x|||||||xxxxxxxxxxxxxxx	tACCCTGTagatccgaatttgtg	PDE4DIP
bta-miR-10a	ENSBTAT00000082827	ENSBTAG00000001564	207	229	-15.08	gTGGGACAgaacaataaggagtt	x|||||||xxxxxxxxxxxxxxx	tACCCTGTagatccgaatttgtg	PDE4DIP
bta-miR-10b	ENSBTAT00000082210	ENSBTAG00000001564	207	229	-15.08	gTGGGACAgaacaataaggagtt	x|||||||xxxxxxxxxxxxxxx	tACCCTGTagaaccgaatttgtg	PDE4DIP
bta-miR-10b	ENSBTAT00000082827	ENSBTAG00000001564	207	229	-15.08	gTGGGACAgaacaataaggagtt	x|||||||xxxxxxxxxxxxxxx	tACCCTGTagaaccgaatttgtg	PDE4DIP
bta-miR-671	ENSBTAT00000002045	ENSBTAG00000001565	42	64	-19.34	cCCTTCGG-ACACACACACACCag	x|||||||x||x|x|x|xx|||xx	aGGAAGCCCTG-GAGGGGCTGGag	MESD
bta-miR-2370-5p	ENSBTAT00000002045	ENSBTAG00000001565	215	238	-13.9	aCCCTTTTTCAGTGTGGACgtcca	x|||||||x|xx|x|x:||xxxxx	tGGGAAAATG--AAAGTTGgttat	MESD
bta-miR-11991	ENSBTAT00000002045	ENSBTAG00000001565	497	517	-17.13	gACAAGACACAGAGgacgtct	x||||||||x|||:xxxxxxx	aTGTTCTGTATCTTgattgta	MESD
bta-miR-320a	ENSBTAT00000002052	ENSBTAG00000001567	720	741	-14.35	gTTTCGACATTTGTGTCCGGga	x|||||||x:xxx|x|||x|xx	aAAAGCTGGGTTGAGAGGGCga	LRRK1
bta-miR-30e-5p	ENSBTAT00000002052	ENSBTAG00000001567	709	735	-16.74	aCATTTGTGTCCGGGAAAGAGTTcagg	x|||||||:xxx||:|xx||x:|xxxx	tGTAAACAT---CCTTGACTGGAagct	LRRK1
bta-miR-30a-5p	ENSBTAT00000002052	ENSBTAG00000001567	712	735	-12.75	aCATTTGTGtccgggaaagagttc	x|||||||:xxxxxxxxxxxxxxx	tGTAAACATcctcgactggaagct	LRRK1
bta-miR-497	ENSBTAT00000002052	ENSBTAG00000001567	114	132	-21.82	aTCGTCGT-T--CACCAAGCct	x|||||||x|xx||||||:|xx	cAGCAGCACACTGTGGTTTGta	LRRK1
bta-miR-30f	ENSBTAT00000002052	ENSBTAG00000001567	711	735	-20.14	aCATTTGTGTCCGGGAAAGAGTTca	x||||||||xxx:x|xx|||||:xx	tGTAAACACCC-TACACTCTCAGct	LRRK1
bta-miR-6535	ENSBTAT00000002055	ENSBTAG00000001575	73	95	-22.72	aTCCCCCTTTGGAAAATGTCTat	x|||||||:x|xx||x:x:||xx	tAGGGGGAG-CGGTTGGAGGAct	CALM2
bta-miR-31	ENSBTAT00000002065	ENSBTAG00000001578	363	383	-14.57	cCCGTTCTTCcctcacgaaag	x|||||||x|xxxxxxxxxxx	aGGCAAGATGctggcatagct	ADPGK
bta-miR-200a	ENSBTAT00000002065	ENSBTAG00000001578	477	499	-18.76	aTTGTGACTTACCTTTAATACta	x|||||||xx|||x||xx|||xx	tAACACTGTCTGGTAACGATGtt	ADPGK
bta-miR-342	ENSBTAT00000002065	ENSBTAG00000001578	418	442	-12.95	tGAGTGTGACccgaaagtctctgcc	x|||||||x|xxxxxxxxxxxxxxx	tCTCACACAGaaatcgcacccatct	ADPGK
bta-miR-2303	ENSBTAT00000002065	ENSBTAG00000001578	475	495	-10.9	tGACTTACctttaatactagg	x|||||||xxxxxxxxxxxxx	tCTGAATGatgtcgactgatg	ADPGK
bta-miR-497	ENSBTAT00000002080	ENSBTAG00000001589	466	488	-20.53	tTCGTCGTCGGGATGGGGGGCgg	x|||||||x|x||::xx:::|xx	cAGCAGCA-CACTGTGGTTTGta	TM9SF2
bta-miR-196a	ENSBTAT00000002080	ENSBTAG00000001589	59	80	-14.6	tTCCATCAGTGTttttgtccac	x|||||||:x||xxxxxxxxxx	tAGGTAGTTTCAtgttgttggg	TM9SF2
bta-miR-181b	ENSBTAT00000002084	ENSBTAG00000001592	1173	1196	-10.87	gTGTAAGTGTCCTAAGTTttgttg	x|||||||:x|xxx||::xxxxxx	aACATTCATTGCTGTCGGtgggtt	INSIG1
bta-miR-181b	ENSBTAT00000069908	ENSBTAG00000001592	1173	1196	-10.87	gTGTAAGTGTCCTAAGTTttgttg	x|||||||:x|xxx||::xxxxxx	aACATTCATTGCTGTCGGtgggtt	INSIG1
bta-miR-425-5p	ENSBTAT00000002084	ENSBTAG00000001592	320	343	-15.07	gACTGTGCCTTGGTctcgaccgtc	x|||||||xx|:||xxxxxxxxxx	aTGACACG--ATCActcccgttga	INSIG1
bta-miR-425-5p	ENSBTAT00000069908	ENSBTAG00000001592	320	343	-15.07	gACTGTGCCTTGGTctcgaccgtc	x|||||||xx|:||xxxxxxxxxx	aTGACACG--ATCActcccgttga	INSIG1
bta-miR-342	ENSBTAT00000002084	ENSBTAG00000001592	949	973	-13.69	aGAGTGTGcaaatttttttattatt	x|||||||xxxxxxxxxxxxxxxxx	tCTCACACagaaatcgcacccatct	INSIG1
bta-miR-342	ENSBTAT00000069908	ENSBTAG00000001592	949	973	-13.69	aGAGTGTGcaaatttttttattatt	x|||||||xxxxxxxxxxxxxxxxx	tCTCACACagaaatcgcacccatct	INSIG1
bta-miR-182	ENSBTAT00000002084	ENSBTAG00000001592	1645	1668	-12.85	tAACCGTTATTTTAAGAAGTCTaa	x||||||||::x|xxxx|||x|xx	tTTGGCAATGGTAGAACTCACAct	INSIG1
bta-miR-92b	ENSBTAT00000002084	ENSBTAG00000001592	883	904	-16.18	gTAACGTGAACttcagcttccg	x||||||||x|xxxxxxxxxxx	tATTGCACTCGtcccggcctcc	INSIG1
bta-miR-92b	ENSBTAT00000069908	ENSBTAG00000001592	883	904	-16.18	gTAACGTGAACttcagcttccg	x||||||||x|xxxxxxxxxxx	tATTGCACTCGtcccggcctcc	INSIG1
bta-miR-2370-5p	ENSBTAT00000002084	ENSBTAG00000001592	701	722	-12.71	cCCCTTTTTCggcagagaagaa	x|||||||x|xxxxxxxxxxxx	tGGGAAAATGaaagttggttat	INSIG1
bta-miR-2370-5p	ENSBTAT00000069908	ENSBTAG00000001592	701	722	-12.71	cCCCTTTTTCggcagagaagaa	x|||||||x|xxxxxxxxxxxx	tGGGAAAATGaaagttggttat	INSIG1
bta-miR-2408	ENSBTAT00000002084	ENSBTAG00000001592	640	660	-17.1	cTGCACACcggctgcccgcgg	x|||||||xxxxxxxxxxxxx	cACGTGTGtgagctcagccgg	INSIG1
bta-miR-2408	ENSBTAT00000069908	ENSBTAG00000001592	640	660	-17.1	cTGCACACcggctgcccgcgg	x|||||||xxxxxxxxxxxxx	cACGTGTGtgagctcagccgg	INSIG1
bta-miR-2431-3p	ENSBTAT00000002084	ENSBTAG00000001592	1083	1107	-15.28	tTGGGGGTTCGACCCTcataaagtt	x|||||||xx||x|x|xxxxxxxxx	cACCCCCA--CTTGCAtgaccctga	INSIG1
bta-miR-2431-3p	ENSBTAT00000069908	ENSBTAG00000001592	1083	1107	-15.28	tTGGGGGTTCGACCCTcataaagtt	x|||||||xx||x|x|xxxxxxxxx	cACCCCCA--CTTGCAtgaccctga	INSIG1
bta-miR-503-3p	ENSBTAT00000002084	ENSBTAG00000001592	1072	1094	-16.34	cCTCATAAagtttcctgaccccg	x|||||||xxxxxxxxxxxxxxx	gGAGTATTgtttctgctgcccgg	INSIG1
bta-miR-503-3p	ENSBTAT00000069908	ENSBTAG00000001592	1072	1094	-16.34	cCTCATAAagtttcctgaccccg	x|||||||xxxxxxxxxxxxxxx	gGAGTATTgtttctgctgcccgg	INSIG1
bta-miR-320a	ENSBTAT00000054497	ENSBTAG00000001598	1040	1060	-12.96	cTTTCGACT-ACCTacagtggg	x|||||||:x|x||xxxxxxxx	aAAAGCTGGGTTGAgagggcga	MAP7
bta-miR-106a	ENSBTAT00000054497	ENSBTAG00000001598	1081	1107	-17.83	cTTTCACGTTCAAACATGTCG-GTTCga	x|||||||xxx||xxx||||:x||:|xx	aAAAGTGC---TT---ACAGTGCAGGta	MAP7
bta-miR-497	ENSBTAT00000054497	ENSBTAG00000001598	819	840	-16	gTCGTCGTtatttgtctgaagt	x|||||||xxxxxxxxxxxxxx	cAGCAGCAcactgtggtttgta	MAP7
bta-miR-2370-5p	ENSBTAT00000054497	ENSBTAG00000001598	1363	1386	-14.39	tCCCTTTTGGGGGTTTAATTAcaa	x|||||||:xxxx||:||::|xxx	tGGGAAAATGA--AAGTTGGTtat	MAP7
bta-miR-2431-3p	ENSBTAT00000054497	ENSBTAG00000001598	1358	1380	-14.96	tTGGGGGTTTAATTACaaaattg	x|||||||xx|xx|||xxxxxxx	cACCCCCACTTGCATGaccctga	MAP7
[truncated: 30,491 more rows]
