# Supplementary material for: Identification and functional analysis of circular RNAs during mitochondrial damage induced by infectious bovine rhinotracheitis virus infection in Madin–Darby bovine kidney cells
Source: Research Square preprint supplement (doi:10.21203/rs.3.rs-6754910/v1), 2025-06-20
Supplement: Supplementary file 3 [file 23d1867961422e0b51fa1b97.xlsx]

## Sheet: Table S20
Table S20: GO enrichment analysis of RBPs
class	GO ID	Description	out (786)	All (17432)	pvalue	p.adjust	Genes
Cellular Component	GO:0005634	nucleus	404	5832	2.24e-26	6.15e-25	ENSBTAG00000000064;ENSBTAG00000000080;ENSBTAG00000000197;ENSBTAG00000000236;ENSBTAG00000000365;ENSBTAG00000000434;ENSBTAG00000000540;ENSBTAG00000000825;ENSBTAG00000000843;ENSBTAG00000001069;ENSBTAG00000001096;ENSBTAG00000001107;ENSBTAG00000001109;ENSBTAG00000001134;ENSBTAG00000001342;ENSBTAG00000001528;ENSBTAG00000001553;ENSBTAG00000001580;ENSBTAG00000001612;ENSBTAG00000001697;ENSBTAG00000001748;…
Cellular Component	GO:0016020	membrane	215	8341	1	1	ENSBTAG00000000062;ENSBTAG00000000215;ENSBTAG00000000279;ENSBTAG00000000417;ENSBTAG00000000434;ENSBTAG00000000540;ENSBTAG00000000616;ENSBTAG00000000797;ENSBTAG00000000991;ENSBTAG00000001027;ENSBTAG00000001069;ENSBTAG00000001109;ENSBTAG00000001174;ENSBTAG00000001204;ENSBTAG00000001246;ENSBTAG00000001289;ENSBTAG00000001419;ENSBTAG00000001516;ENSBTAG00000001520;ENSBTAG00000001697;ENSBTAG00000001700;…
Cellular Component	GO:0005739	mitochondrion	107	1308	9.01e-10	1.51e-08	ENSBTAG00000000064;ENSBTAG00000000072;ENSBTAG00000000084;ENSBTAG00000000417;ENSBTAG00000000434;ENSBTAG00000000797;ENSBTAG00000000825;ENSBTAG00000000991;ENSBTAG00000001069;ENSBTAG00000001109;ENSBTAG00000001174;ENSBTAG00000001289;ENSBTAG00000001302;ENSBTAG00000001306;ENSBTAG00000001419;ENSBTAG00000001520;ENSBTAG00000001808;ENSBTAG00000001832;ENSBTAG00000002620;ENSBTAG00000002708;ENSBTAG00000003294;…
Cellular Component	GO:0005840	ribosome	103	373	7.61e-53	9.76e-51	ENSBTAG00000000084;ENSBTAG00000000417;ENSBTAG00000000797;ENSBTAG00000000825;ENSBTAG00000000950;ENSBTAG00000000991;ENSBTAG00000001109;ENSBTAG00000001174;ENSBTAG00000001289;ENSBTAG00000001342;ENSBTAG00000001360;ENSBTAG00000001419;ENSBTAG00000001520;ENSBTAG00000001777;ENSBTAG00000001782;ENSBTAG00000001794;ENSBTAG00000001832;ENSBTAG00000002026;ENSBTAG00000002060;ENSBTAG00000002468;ENSBTAG00000002648;…
Cellular Component	GO:0005730	nucleolus	90	728	1.51e-18	3.33e-17	ENSBTAG00000000064;ENSBTAG00000000080;ENSBTAG00000000197;ENSBTAG00000001069;ENSBTAG00000001342;ENSBTAG00000002004;ENSBTAG00000002026;ENSBTAG00000002060;ENSBTAG00000002174;ENSBTAG00000002223;ENSBTAG00000002869;ENSBTAG00000002973;ENSBTAG00000003225;ENSBTAG00000003229;ENSBTAG00000003263;ENSBTAG00000003460;ENSBTAG00000003934;ENSBTAG00000004051;ENSBTAG00000004654;ENSBTAG00000005620;ENSBTAG00000005627;…
Cellular Component	GO:0005694	chromosome	62	933	0.001404	0.011879	ENSBTAG00000000064;ENSBTAG00000001069;ENSBTAG00000002086;ENSBTAG00000002224;ENSBTAG00000002253;ENSBTAG00000002620;ENSBTAG00000004964;ENSBTAG00000006142;ENSBTAG00000007234;ENSBTAG00000007749;ENSBTAG00000008001;ENSBTAG00000008321;ENSBTAG00000009516;ENSBTAG00000010167;ENSBTAG00000010624;ENSBTAG00000010721;ENSBTAG00000010792;ENSBTAG00000010982;ENSBTAG00000011198;ENSBTAG00000011224;ENSBTAG00000011508;…
Cellular Component	GO:0031982	vesicle	43	937	0.47506	0.676169	ENSBTAG00000000540;ENSBTAG00000000778;ENSBTAG00000001700;ENSBTAG00000002788;ENSBTAG00000003525;ENSBTAG00000004279;ENSBTAG00000005016;ENSBTAG00000005337;ENSBTAG00000005694;ENSBTAG00000005726;ENSBTAG00000005743;ENSBTAG00000006270;ENSBTAG00000006556;ENSBTAG00000006690;ENSBTAG00000007306;ENSBTAG00000008631;ENSBTAG00000008792;ENSBTAG00000010584;ENSBTAG00000010624;ENSBTAG00000010635;ENSBTAG00000012774;…
Cellular Component	GO:0005794	Golgi apparatus	39	1029	0.891583	0.976556	ENSBTAG00000000279;ENSBTAG00000000843;ENSBTAG00000001528;ENSBTAG00000001700;ENSBTAG00000002417;ENSBTAG00000002788;ENSBTAG00000003908;ENSBTAG00000004654;ENSBTAG00000004964;ENSBTAG00000005163;ENSBTAG00000005326;ENSBTAG00000005694;ENSBTAG00000005743;ENSBTAG00000006556;ENSBTAG00000006690;ENSBTAG00000006785;ENSBTAG00000007497;ENSBTAG00000007703;ENSBTAG00000008129;ENSBTAG00000009939;ENSBTAG00000010490;…
Cellular Component	GO:0005819	spindle	16	277	0.186747	0.429239	ENSBTAG00000000630;ENSBTAG00000001700;ENSBTAG00000002726;ENSBTAG00000003515;ENSBTAG00000003908;ENSBTAG00000004051;ENSBTAG00000005620;ENSBTAG00000006667;ENSBTAG00000007817;ENSBTAG00000012566;ENSBTAG00000014366;ENSBTAG00000015659;ENSBTAG00000016708;ENSBTAG00000017761;ENSBTAG00000021219;ENSBTAG00000046037
Cellular Component	GO:0030496	midbody	13	137	0.009024	0.05649	ENSBTAG00000001700;ENSBTAG00000003362;ENSBTAG00000004279;ENSBTAG00000007662;ENSBTAG00000008040;ENSBTAG00000008321;ENSBTAG00000010167;ENSBTAG00000011198;ENSBTAG00000012125;ENSBTAG00000012566;ENSBTAG00000021151;ENSBTAG00000021219;ENSBTAG00000038696
class	GO ID	Description	out (802)	All (16553)	pvalue	p.adjust	Genes
Molecular Function	GO:0005515	protein binding	376	7481	0.171379	0.420703	ENSBTAG00000000080;ENSBTAG00000000215;ENSBTAG00000000236;ENSBTAG00000000359;ENSBTAG00000000365;ENSBTAG00000000411;ENSBTAG00000000434;ENSBTAG00000000505;ENSBTAG00000000540;ENSBTAG00000000712;ENSBTAG00000000773;ENSBTAG00000000778;ENSBTAG00000001027;ENSBTAG00000001069;ENSBTAG00000001096;ENSBTAG00000001107;ENSBTAG00000001134;ENSBTAG00000001246;ENSBTAG00000001484;ENSBTAG00000001508;ENSBTAG00000001516;…
Molecular Function	GO:0043167	ion binding	263	4755	0.005494	0.055717	ENSBTAG00000000062;ENSBTAG00000000071;ENSBTAG00000000279;ENSBTAG00000000365;ENSBTAG00000000411;ENSBTAG00000000434;ENSBTAG00000000505;ENSBTAG00000000540;ENSBTAG00000000778;ENSBTAG00000001069;ENSBTAG00000001246;ENSBTAG00000001306;ENSBTAG00000001528;ENSBTAG00000001580;ENSBTAG00000001700;ENSBTAG00000001748;ENSBTAG00000001808;ENSBTAG00000002086;ENSBTAG00000002090;ENSBTAG00000002126;ENSBTAG00000002174;…
Molecular Function	GO:0003723	RNA binding	182	1090	8.65e-53	8.68e-50	ENSBTAG00000000179;ENSBTAG00000000197;ENSBTAG00000000359;ENSBTAG00000000435;ENSBTAG00000000630;ENSBTAG00000001069;ENSBTAG00000001096;ENSBTAG00000001289;ENSBTAG00000001342;ENSBTAG00000001520;ENSBTAG00000001553;ENSBTAG00000001697;ENSBTAG00000001808;ENSBTAG00000001988;ENSBTAG00000002018;ENSBTAG00000002026;ENSBTAG00000002060;ENSBTAG00000002223;ENSBTAG00000002279;ENSBTAG00000002282;ENSBTAG00000002332;…
Molecular Function	GO:0001882	nucleoside binding	133	1642	1.32e-09	5.08e-08	ENSBTAG00000000062;ENSBTAG00000000279;ENSBTAG00000000540;ENSBTAG00000000778;ENSBTAG00000001246;ENSBTAG00000001528;ENSBTAG00000001700;ENSBTAG00000002086;ENSBTAG00000002126;ENSBTAG00000002174;ENSBTAG00000002238;ENSBTAG00000002293;ENSBTAG00000002417;ENSBTAG00000002475;ENSBTAG00000002608;ENSBTAG00000002742;ENSBTAG00000002788;ENSBTAG00000002869;ENSBTAG00000003218;ENSBTAG00000003291;ENSBTAG00000003362;…
Molecular Function	GO:0019899	enzyme binding	106	1503	4.62e-05	0.000928	ENSBTAG00000000215;ENSBTAG00000000411;ENSBTAG00000001069;ENSBTAG00000001096;ENSBTAG00000001107;ENSBTAG00000001528;ENSBTAG00000001700;ENSBTAG00000002082;ENSBTAG00000002126;ENSBTAG00000002726;ENSBTAG00000002742;ENSBTAG00000003229;ENSBTAG00000003362;ENSBTAG00000003418;ENSBTAG00000003807;ENSBTAG00000003908;ENSBTAG00000004279;ENSBTAG00000004630;ENSBTAG00000004672;ENSBTAG00000004679;ENSBTAG00000004695;…
Molecular Function	GO:0003677	DNA binding	84	2031	0.952303	1	ENSBTAG00000000064;ENSBTAG00000000080;ENSBTAG00000000365;ENSBTAG00000000630;ENSBTAG00000001069;ENSBTAG00000001134;ENSBTAG00000001856;ENSBTAG00000002224;ENSBTAG00000002620;ENSBTAG00000002742;ENSBTAG00000004695;ENSBTAG00000005446;ENSBTAG00000005572;ENSBTAG00000005620;ENSBTAG00000005726;ENSBTAG00000005861;ENSBTAG00000006059;ENSBTAG00000006142;ENSBTAG00000006280;ENSBTAG00000006650;ENSBTAG00000006754;…
Molecular Function	GO:0005525	GTP binding	75	361	1.48e-27	2.13e-25	ENSBTAG00000000062;ENSBTAG00000000279;ENSBTAG00000000540;ENSBTAG00000001700;ENSBTAG00000002174;ENSBTAG00000002238;ENSBTAG00000002293;ENSBTAG00000002417;ENSBTAG00000002475;ENSBTAG00000002608;ENSBTAG00000002788;ENSBTAG00000002869;ENSBTAG00000003218;ENSBTAG00000003474;ENSBTAG00000004131;ENSBTAG00000004258;ENSBTAG00000004279;ENSBTAG00000004551;ENSBTAG00000004651;ENSBTAG00000005337;ENSBTAG00000006534;…
Molecular Function	GO:0005524	ATP binding	60	1282	0.632582	0.835674	ENSBTAG00000000778;ENSBTAG00000001246;ENSBTAG00000001528;ENSBTAG00000002086;ENSBTAG00000002126;ENSBTAG00000002742;ENSBTAG00000003291;ENSBTAG00000003362;ENSBTAG00000003570;ENSBTAG00000004054;ENSBTAG00000004651;ENSBTAG00000004679;ENSBTAG00000004695;ENSBTAG00000005326;ENSBTAG00000005607;ENSBTAG00000006142;ENSBTAG00000006270;ENSBTAG00000006305;ENSBTAG00000006370;ENSBTAG00000006671;ENSBTAG00000007304;…
Molecular Function	GO:0003729	mRNA binding	39	236	1.49e-11	1.07e-09	ENSBTAG00000001069;ENSBTAG00000001697;ENSBTAG00000002279;ENSBTAG00000003162;ENSBTAG00000003205;ENSBTAG00000003702;ENSBTAG00000003719;ENSBTAG00000005296;ENSBTAG00000005620;ENSBTAG00000005726;ENSBTAG00000006142;ENSBTAG00000006280;ENSBTAG00000006330;ENSBTAG00000006767;ENSBTAG00000008224;ENSBTAG00000008716;ENSBTAG00000008873;ENSBTAG00000009488;ENSBTAG00000009516;ENSBTAG00000010207;ENSBTAG00000011316;…
Molecular Function	GO:0008289	lipid binding	19	629	0.991869	1	ENSBTAG00000000071;ENSBTAG00000001246;ENSBTAG00000006564;ENSBTAG00000006667;ENSBTAG00000006955;ENSBTAG00000008338;ENSBTAG00000009615;ENSBTAG00000009696;ENSBTAG00000010551;ENSBTAG00000010964;ENSBTAG00000012398;ENSBTAG00000012909;ENSBTAG00000013162;ENSBTAG00000013653;ENSBTAG00000016819;ENSBTAG00000018054;ENSBTAG00000020218;ENSBTAG00000033803;ENSBTAG00000047330
class	GO ID	Description	out (775)	All (17045)	pvalue	p.adjust	Genes
Biological Process	GO:0065007	biological regulation	424	10899	1	1	ENSBTAG00000000062;ENSBTAG00000000064;ENSBTAG00000000072;ENSBTAG00000000215;ENSBTAG00000000236;ENSBTAG00000000279;ENSBTAG00000000411;ENSBTAG00000000417;ENSBTAG00000000434;ENSBTAG00000000435;ENSBTAG00000000534;ENSBTAG00000000540;ENSBTAG00000000616;ENSBTAG00000000630;ENSBTAG00000000843;ENSBTAG00000001069;ENSBTAG00000001096;ENSBTAG00000001134;ENSBTAG00000001204;ENSBTAG00000001246;ENSBTAG00000001306;…
Biological Process	GO:0010467	gene expression	404	4740	1.61e-48	1.53e-45	ENSBTAG00000000072;ENSBTAG00000000084;ENSBTAG00000000197;ENSBTAG00000000359;ENSBTAG00000000411;ENSBTAG00000000417;ENSBTAG00000000434;ENSBTAG00000000435;ENSBTAG00000000630;ENSBTAG00000000797;ENSBTAG00000000950;ENSBTAG00000000991;ENSBTAG00000001027;ENSBTAG00000001069;ENSBTAG00000001096;ENSBTAG00000001109;ENSBTAG00000001134;ENSBTAG00000001174;ENSBTAG00000001289;ENSBTAG00000001302;ENSBTAG00000001306;…
Biological Process	GO:0050896	response to stimulus	266	7535	1	1	ENSBTAG00000000062;ENSBTAG00000000215;ENSBTAG00000000236;ENSBTAG00000000365;ENSBTAG00000000411;ENSBTAG00000000434;ENSBTAG00000000435;ENSBTAG00000000534;ENSBTAG00000000540;ENSBTAG00000000616;ENSBTAG00000000630;ENSBTAG00000000843;ENSBTAG00000001069;ENSBTAG00000001096;ENSBTAG00000001107;ENSBTAG00000001134;ENSBTAG00000001204;ENSBTAG00000001246;ENSBTAG00000001306;ENSBTAG00000001508;ENSBTAG00000001516;…
Biological Process	GO:0007165	signal transduction	166	5307	1	1	ENSBTAG00000000062;ENSBTAG00000000215;ENSBTAG00000000236;ENSBTAG00000000411;ENSBTAG00000000534;ENSBTAG00000000616;ENSBTAG00000000630;ENSBTAG00000000843;ENSBTAG00000001069;ENSBTAG00000001096;ENSBTAG00000001204;ENSBTAG00000001306;ENSBTAG00000001508;ENSBTAG00000001516;ENSBTAG00000001700;ENSBTAG00000002174;ENSBTAG00000002278;ENSBTAG00000002417;ENSBTAG00000002742;ENSBTAG00000002988;ENSBTAG00000003229;…
Biological Process	GO:0008104	protein localization	105	1725	0.001102	0.028614	ENSBTAG00000000236;ENSBTAG00000000279;ENSBTAG00000000411;ENSBTAG00000001069;ENSBTAG00000001484;ENSBTAG00000001700;ENSBTAG00000002278;ENSBTAG00000002293;ENSBTAG00000002742;ENSBTAG00000002953;ENSBTAG00000003362;ENSBTAG00000003418;ENSBTAG00000003525;ENSBTAG00000003908;ENSBTAG00000004630;ENSBTAG00000004672;ENSBTAG00000004937;ENSBTAG00000005016;ENSBTAG00000005664;ENSBTAG00000005694;ENSBTAG00000006270;…
Biological Process	GO:0008380	RNA splicing	66	333	1.17e-24	2.9e-22	ENSBTAG00000001528;ENSBTAG00000001553;ENSBTAG00000001697;ENSBTAG00000002086;ENSBTAG00000002279;ENSBTAG00000002332;ENSBTAG00000002720;ENSBTAG00000003390;ENSBTAG00000004571;ENSBTAG00000005726;ENSBTAG00000005743;ENSBTAG00000006104;ENSBTAG00000006250;ENSBTAG00000006280;ENSBTAG00000006330;ENSBTAG00000006493;ENSBTAG00000007234;ENSBTAG00000007304;ENSBTAG00000007872;ENSBTAG00000007913;ENSBTAG00000008136;…
Biological Process	GO:0008283	cell proliferation	62	1355	0.498984	0.727792	ENSBTAG00000000215;ENSBTAG00000000435;ENSBTAG00000000843;ENSBTAG00000001069;ENSBTAG00000001204;ENSBTAG00000001306;ENSBTAG00000001700;ENSBTAG00000002174;ENSBTAG00000002224;ENSBTAG00000003229;ENSBTAG00000003418;ENSBTAG00000004051;ENSBTAG00000004279;ENSBTAG00000004630;ENSBTAG00000004651;ENSBTAG00000005620;ENSBTAG00000006487;ENSBTAG00000007367;ENSBTAG00000008113;ENSBTAG00000008631;ENSBTAG00000008731;…
Biological Process	GO:0042254	ribosome biogenesis	58	290	5.46e-22	1.12e-19	ENSBTAG00000000072;ENSBTAG00000001342;ENSBTAG00000001832;ENSBTAG00000002026;ENSBTAG00000002223;ENSBTAG00000002468;ENSBTAG00000002973;ENSBTAG00000003205;ENSBTAG00000004051;ENSBTAG00000004654;ENSBTAG00000006104;ENSBTAG00000006843;ENSBTAG00000007702;ENSBTAG00000009491;ENSBTAG00000009757;ENSBTAG00000009838;ENSBTAG00000010042;ENSBTAG00000011263;ENSBTAG00000011554;ENSBTAG00000011559;ENSBTAG00000011812;…
Biological Process	GO:0006281	DNA repair	28	383	0.009329	0.129254	ENSBTAG00000000365;ENSBTAG00000001069;ENSBTAG00000002620;ENSBTAG00000002742;ENSBTAG00000004695;ENSBTAG00000005620;ENSBTAG00000007749;ENSBTAG00000007817;ENSBTAG00000008001;ENSBTAG00000008321;ENSBTAG00000009446;ENSBTAG00000009518;ENSBTAG00000009661;ENSBTAG00000009906;ENSBTAG00000010982;ENSBTAG00000014366;ENSBTAG00000017761;ENSBTAG00000018420;ENSBTAG00000019821;ENSBTAG00000019846;ENSBTAG00000020160;…
Biological Process	GO:0000165	MAPK cascade	22	559	0.787753	0.889825	ENSBTAG00000000236;ENSBTAG00000000411;ENSBTAG00000000843;ENSBTAG00000001204;ENSBTAG00000001700;ENSBTAG00000005620;ENSBTAG00000006665;ENSBTAG00000006709;ENSBTAG00000008338;ENSBTAG00000008967;ENSBTAG00000010347;ENSBTAG00000011316;ENSBTAG00000011754;ENSBTAG00000012062;ENSBTAG00000012450;ENSBTAG00000013860;ENSBTAG00000016420;ENSBTAG00000018239;ENSBTAG00000018928;ENSBTAG00000025462;ENSBTAG00000036009;…
