# Supplementary material for: Identification and functional analysis of circular RNAs during mitochondrial damage induced by infectious bovine rhinotracheitis virus infection in Madin–Darby bovine kidney cells
Source: Research Square preprint supplement (doi:10.21203/rs.3.rs-6754910/v1), 2025-06-20
Supplement: Supplementary file 4 [file 2a757befc0feca8214e5790c.xlsx]

## Sheet: Table S9
Table S9: KEGG enrichment analysis of source genes of differentially expressed circRNAs
Pathway	out (46)	All (9497)	Pvalue	Qvalue	Pathway ID	Genes	K_IDs
Endocytosis	6	261	0.00151413	0.213493	ko04144	ENSBTAG00000018004;ENSBTAG00000003185;ENSBTAG00000012314;ENSBTAG00000016504;ENSBTAG00000001057;ENSBTAG00000003378	K11247+K12488+K12473+K12491+K12493+K12489
Gastric cancer	4	155	0.00654144	0.461171	ko05226	ENSBTAG00000021964;ENSBTAG00000017788;ENSBTAG00000014182;ENSBTAG00000011761	K06811+K04456+K05691+K03068
mTOR signaling pathway	4	175	0.00995443	0.467858	ko04150	ENSBTAG00000017788;ENSBTAG00000006697;ENSBTAG00000011761;ENSBTAG00000025443	K04456+K08267+K03068+K20400
Spinocerebellar ataxia	3	103	0.0134197	0.473044	ko05017	ENSBTAG00000017788;ENSBTAG00000017326;ENSBTAG00000009351	K04456+K23010+K19323
Thyroid hormone signaling pathway	3	116	0.0184142	0.51928	ko04919	ENSBTAG00000017788;ENSBTAG00000003552;ENSBTAG00000013271	K04456+K15133+K04650
Sphingolipid metabolism	2	49	0.0233642	0.549058	ko00600	ENSBTAG00000020480;ENSBTAG00000044063	K00654+K07553
Endometrial cancer	2	61	0.0350541	0.655364	ko05213	ENSBTAG00000017788;ENSBTAG00000014182	K04456+K05691
Longevity regulating pathway - multiple species	2	63	0.0371838	0.655364	ko04213	ENSBTAG00000017788;ENSBTAG00000001280	K04456+K03695
Renal cell carcinoma	2	78	0.0546375	0.675038	ko05211	ENSBTAG00000017788;ENSBTAG00000020791	K04456+K06277
Axon guidance	3	184	0.0592023	0.675038	ko04360	ENSBTAG00000009565;ENSBTAG00000018307;ENSBTAG00000016999	K04352+K06840+K05128
Primary bile acid biosynthesis	1	15	0.0702922	0.675038	ko00120	ENSBTAG00000003746	K08764
Focal adhesion	3	201	0.0730724	0.675038	ko04510	ENSBTAG00000017788;ENSBTAG00000020791;ENSBTAG00000000700	K04456+K06277+K06275
Endocrine resistance	2	97	0.0800058	0.675038	ko01522	ENSBTAG00000017788;ENSBTAG00000013271	K04456+K04650
Parathyroid hormone synthesis, secretion and action	2	107	0.0945731	0.675038	ko04928	ENSBTAG00000001545;ENSBTAG00000011761	K14683+K03068
Mannose type O-glycan biosynthesis	1	23	0.105781	0.675038	ko00515	ENSBTAG00000015073	K21031
Fc gamma R-mediated phagocytosis	2	115	0.106737	0.675038	ko04666	ENSBTAG00000017788;ENSBTAG00000003185	K04456+K12488
Sphingolipid signaling pathway	2	122	0.117709	0.675038	ko04071	ENSBTAG00000017788;ENSBTAG00000020480	K04456+K00654
Neurotrophin signaling pathway	2	122	0.117709	0.675038	ko04722	ENSBTAG00000017788;ENSBTAG00000020791	K04456+K06277
Toxoplasmosis	2	122	0.117709	0.675038	ko05145	ENSBTAG00000017788;ENSBTAG00000012314	K04456+K12473
Hippo signaling pathway - multiple species	1	28	0.127284	0.675038	ko04392	ENSBTAG00000013153	K16684
