# Supplementary material for: Identification and functional analysis of circular RNAs during mitochondrial damage induced by infectious bovine rhinotracheitis virus infection in Madin–Darby bovine kidney cells
Source: Research Square preprint supplement (doi:10.21203/rs.3.rs-6754910/v1), 2025-06-20
Supplement: Supplementary file 5 [file 377d9ccd660e463cb9e9ef93.xlsx]

## Sheet: Table S16
Table S16：GO enrichment analysis of 4611 mRNAs
class	GO ID	Description	out (4083)	All (17432)	pvalue	p.adjust	Genes
Cellular Component	GO:0005623	cell	3867	14987	1.70033e-89	1.20723e-87	ENSBTAG00000000013;ENSBTAG00000000014;ENSBTAG00000000021;ENSBTAG00000000022;ENSBTAG00000000023;ENSBTAG00000000025;ENSBTAG00000000030;ENSBTAG00000000031;ENSBTAG00000000039;ENSBTAG00000000042;ENSBTAG00000000061;ENSBTAG00000000064;ENSBTAG00000000073;ENSBTAG00000000078;ENSBTAG00000000080;ENSBTAG00000000081;ENSBTAG00000000087;ENSBTAG00000000088;ENSBTAG00000000092;ENSBTAG00000000094;ENSBTAG00000000098;…
Cellular Component	GO:0044464	cell part	3867	14987	1.70033e-89	1.20723e-87	ENSBTAG00000000013;ENSBTAG00000000014;ENSBTAG00000000021;ENSBTAG00000000022;ENSBTAG00000000023;ENSBTAG00000000025;ENSBTAG00000000030;ENSBTAG00000000031;ENSBTAG00000000039;ENSBTAG00000000042;ENSBTAG00000000061;ENSBTAG00000000064;ENSBTAG00000000073;ENSBTAG00000000078;ENSBTAG00000000080;ENSBTAG00000000081;ENSBTAG00000000087;ENSBTAG00000000088;ENSBTAG00000000092;ENSBTAG00000000094;ENSBTAG00000000098;…
Cellular Component	GO:0005622	intracellular	3651	12260	2.35795e-235	1.59044e-232	ENSBTAG00000000013;ENSBTAG00000000014;ENSBTAG00000000021;ENSBTAG00000000022;ENSBTAG00000000023;ENSBTAG00000000025;ENSBTAG00000000030;ENSBTAG00000000039;ENSBTAG00000000042;ENSBTAG00000000064;ENSBTAG00000000073;ENSBTAG00000000078;ENSBTAG00000000080;ENSBTAG00000000081;ENSBTAG00000000087;ENSBTAG00000000092;ENSBTAG00000000094;ENSBTAG00000000098;ENSBTAG00000000099;ENSBTAG00000000108;ENSBTAG00000000113;…
Cellular Component	GO:0044424	intracellular part	3651	12260	2.35795e-235	1.59044e-232	ENSBTAG00000000013;ENSBTAG00000000014;ENSBTAG00000000021;ENSBTAG00000000022;ENSBTAG00000000023;ENSBTAG00000000025;ENSBTAG00000000030;ENSBTAG00000000039;ENSBTAG00000000042;ENSBTAG00000000064;ENSBTAG00000000073;ENSBTAG00000000078;ENSBTAG00000000080;ENSBTAG00000000081;ENSBTAG00000000087;ENSBTAG00000000092;ENSBTAG00000000094;ENSBTAG00000000098;ENSBTAG00000000099;ENSBTAG00000000108;ENSBTAG00000000113;…
Cellular Component	GO:0043226	organelle	3270	10771	2.05033e-178	4.60982e-176	ENSBTAG00000000013;ENSBTAG00000000014;ENSBTAG00000000022;ENSBTAG00000000023;ENSBTAG00000000025;ENSBTAG00000000030;ENSBTAG00000000031;ENSBTAG00000000039;ENSBTAG00000000042;ENSBTAG00000000064;ENSBTAG00000000073;ENSBTAG00000000078;ENSBTAG00000000080;ENSBTAG00000000081;ENSBTAG00000000087;ENSBTAG00000000092;ENSBTAG00000000094;ENSBTAG00000000098;ENSBTAG00000000099;ENSBTAG00000000108;ENSBTAG00000000113;…
Cellular Component	GO:0043229	intracellular organelle	3248	10568	4.43155e-188	1.19563e-185	ENSBTAG00000000013;ENSBTAG00000000014;ENSBTAG00000000022;ENSBTAG00000000023;ENSBTAG00000000025;ENSBTAG00000000030;ENSBTAG00000000039;ENSBTAG00000000042;ENSBTAG00000000064;ENSBTAG00000000073;ENSBTAG00000000078;ENSBTAG00000000080;ENSBTAG00000000081;ENSBTAG00000000087;ENSBTAG00000000092;ENSBTAG00000000094;ENSBTAG00000000098;ENSBTAG00000000099;ENSBTAG00000000108;ENSBTAG00000000113;ENSBTAG00000000131;…
Cellular Component	GO:0043227	membrane-bounded organelle	2988	9228	1.20132e-199	4.05145e-197	ENSBTAG00000000013;ENSBTAG00000000014;ENSBTAG00000000022;ENSBTAG00000000023;ENSBTAG00000000025;ENSBTAG00000000030;ENSBTAG00000000039;ENSBTAG00000000042;ENSBTAG00000000064;ENSBTAG00000000073;ENSBTAG00000000078;ENSBTAG00000000080;ENSBTAG00000000081;ENSBTAG00000000087;ENSBTAG00000000092;ENSBTAG00000000094;ENSBTAG00000000098;ENSBTAG00000000099;ENSBTAG00000000108;ENSBTAG00000000113;ENSBTAG00000000131;…
Cellular Component	GO:0043231	intracellular membrane-bounded organelle	2979	9178	1.31775e-200	5.92547e-198	ENSBTAG00000000013;ENSBTAG00000000014;ENSBTAG00000000022;ENSBTAG00000000023;ENSBTAG00000000025;ENSBTAG00000000030;ENSBTAG00000000039;ENSBTAG00000000042;ENSBTAG00000000064;ENSBTAG00000000073;ENSBTAG00000000078;ENSBTAG00000000080;ENSBTAG00000000081;ENSBTAG00000000087;ENSBTAG00000000092;ENSBTAG00000000094;ENSBTAG00000000098;ENSBTAG00000000099;ENSBTAG00000000108;ENSBTAG00000000113;ENSBTAG00000000131;…
Cellular Component	GO:0005737	cytoplasm	2809	8954	3.28781e-146	5.54408e-144	ENSBTAG00000000013;ENSBTAG00000000014;ENSBTAG00000000021;ENSBTAG00000000025;ENSBTAG00000000030;ENSBTAG00000000042;ENSBTAG00000000064;ENSBTAG00000000073;ENSBTAG00000000078;ENSBTAG00000000080;ENSBTAG00000000081;ENSBTAG00000000087;ENSBTAG00000000092;ENSBTAG00000000094;ENSBTAG00000000098;ENSBTAG00000000099;ENSBTAG00000000113;ENSBTAG00000000132;ENSBTAG00000000137;ENSBTAG00000000147;ENSBTAG00000000149;…
Cellular Component	GO:0044422	organelle part	2383	7148	1.10564e-144	1.65723e-142	ENSBTAG00000000013;ENSBTAG00000000014;ENSBTAG00000000022;ENSBTAG00000000023;ENSBTAG00000000025;ENSBTAG00000000030;ENSBTAG00000000039;ENSBTAG00000000064;ENSBTAG00000000073;ENSBTAG00000000078;ENSBTAG00000000080;ENSBTAG00000000081;ENSBTAG00000000087;ENSBTAG00000000092;ENSBTAG00000000098;ENSBTAG00000000099;ENSBTAG00000000113;ENSBTAG00000000131;ENSBTAG00000000152;ENSBTAG00000000162;ENSBTAG00000000184;…
Cellular Component	GO:0044446	intracellular organelle part	2354	6949	1.18452e-152	2.28273e-150	ENSBTAG00000000013;ENSBTAG00000000014;ENSBTAG00000000022;ENSBTAG00000000023;ENSBTAG00000000025;ENSBTAG00000000030;ENSBTAG00000000039;ENSBTAG00000000064;ENSBTAG00000000073;ENSBTAG00000000078;ENSBTAG00000000080;ENSBTAG00000000081;ENSBTAG00000000087;ENSBTAG00000000092;ENSBTAG00000000098;ENSBTAG00000000099;ENSBTAG00000000113;ENSBTAG00000000131;ENSBTAG00000000152;ENSBTAG00000000162;ENSBTAG00000000184;…
Cellular Component	GO:0044444	cytoplasmic part	2309	7014	1.65854e-128	2.03397e-126	ENSBTAG00000000013;ENSBTAG00000000014;ENSBTAG00000000021;ENSBTAG00000000025;ENSBTAG00000000030;ENSBTAG00000000042;ENSBTAG00000000064;ENSBTAG00000000073;ENSBTAG00000000078;ENSBTAG00000000080;ENSBTAG00000000081;ENSBTAG00000000087;ENSBTAG00000000092;ENSBTAG00000000094;ENSBTAG00000000099;ENSBTAG00000000113;ENSBTAG00000000137;ENSBTAG00000000147;ENSBTAG00000000149;ENSBTAG00000000152;ENSBTAG00000000162;…
Cellular Component	GO:0005634	nucleus	1950	5832	4.44469e-105	3.74743e-103	ENSBTAG00000000013;ENSBTAG00000000014;ENSBTAG00000000022;ENSBTAG00000000023;ENSBTAG00000000030;ENSBTAG00000000039;ENSBTAG00000000064;ENSBTAG00000000080;ENSBTAG00000000081;ENSBTAG00000000092;ENSBTAG00000000098;ENSBTAG00000000099;ENSBTAG00000000108;ENSBTAG00000000131;ENSBTAG00000000149;ENSBTAG00000000152;ENSBTAG00000000162;ENSBTAG00000000222;ENSBTAG00000000224;ENSBTAG00000000236;ENSBTAG00000000252;…
Cellular Component	GO:0032991	macromolecular complex	1578	4973	4.08409e-58	2.50429e-56	ENSBTAG00000000021;ENSBTAG00000000022;ENSBTAG00000000023;ENSBTAG00000000039;ENSBTAG00000000050;ENSBTAG00000000064;ENSBTAG00000000080;ENSBTAG00000000087;ENSBTAG00000000088;ENSBTAG00000000113;ENSBTAG00000000131;ENSBTAG00000000152;ENSBTAG00000000162;ENSBTAG00000000203;ENSBTAG00000000215;ENSBTAG00000000231;ENSBTAG00000000241;ENSBTAG00000000252;ENSBTAG00000000260;ENSBTAG00000000267;ENSBTAG00000000283;…
Cellular Component	GO:0044428	nuclear part	1455	3726	1.53707e-131	2.07351e-129	ENSBTAG00000000013;ENSBTAG00000000014;ENSBTAG00000000022;ENSBTAG00000000023;ENSBTAG00000000030;ENSBTAG00000000039;ENSBTAG00000000064;ENSBTAG00000000080;ENSBTAG00000000081;ENSBTAG00000000092;ENSBTAG00000000098;ENSBTAG00000000131;ENSBTAG00000000152;ENSBTAG00000000162;ENSBTAG00000000222;ENSBTAG00000000224;ENSBTAG00000000252;ENSBTAG00000000260;ENSBTAG00000000267;ENSBTAG00000000283;ENSBTAG00000000288;…
Cellular Component	GO:0031974	membrane-enclosed lumen	1408	3644	1.86403e-121	2.09548e-119	ENSBTAG00000000013;ENSBTAG00000000014;ENSBTAG00000000022;ENSBTAG00000000023;ENSBTAG00000000030;ENSBTAG00000000039;ENSBTAG00000000064;ENSBTAG00000000073;ENSBTAG00000000080;ENSBTAG00000000081;ENSBTAG00000000092;ENSBTAG00000000098;ENSBTAG00000000131;ENSBTAG00000000152;ENSBTAG00000000222;ENSBTAG00000000224;ENSBTAG00000000252;ENSBTAG00000000260;ENSBTAG00000000267;ENSBTAG00000000283;ENSBTAG00000000322;…
Cellular Component	GO:0043233	organelle lumen	1392	3599	4.16056e-120	4.009e-118	ENSBTAG00000000013;ENSBTAG00000000014;ENSBTAG00000000022;ENSBTAG00000000023;ENSBTAG00000000030;ENSBTAG00000000039;ENSBTAG00000000064;ENSBTAG00000000073;ENSBTAG00000000080;ENSBTAG00000000081;ENSBTAG00000000092;ENSBTAG00000000098;ENSBTAG00000000131;ENSBTAG00000000152;ENSBTAG00000000222;ENSBTAG00000000224;ENSBTAG00000000252;ENSBTAG00000000260;ENSBTAG00000000267;ENSBTAG00000000283;ENSBTAG00000000322;…
Cellular Component	GO:0070013	intracellular organelle lumen	1391	3595	3.64956e-120	3.78712e-118	ENSBTAG00000000013;ENSBTAG00000000014;ENSBTAG00000000022;ENSBTAG00000000023;ENSBTAG00000000030;ENSBTAG00000000039;ENSBTAG00000000064;ENSBTAG00000000073;ENSBTAG00000000080;ENSBTAG00000000081;ENSBTAG00000000092;ENSBTAG00000000098;ENSBTAG00000000131;ENSBTAG00000000152;ENSBTAG00000000222;ENSBTAG00000000224;ENSBTAG00000000252;ENSBTAG00000000260;ENSBTAG00000000267;ENSBTAG00000000283;ENSBTAG00000000322;…
Cellular Component	GO:0031981	nuclear lumen	1310	3357	9.93539e-115	8.93522e-113	ENSBTAG00000000013;ENSBTAG00000000014;ENSBTAG00000000022;ENSBTAG00000000023;ENSBTAG00000000030;ENSBTAG00000000039;ENSBTAG00000000064;ENSBTAG00000000080;ENSBTAG00000000081;ENSBTAG00000000092;ENSBTAG00000000098;ENSBTAG00000000131;ENSBTAG00000000152;ENSBTAG00000000222;ENSBTAG00000000224;ENSBTAG00000000252;ENSBTAG00000000260;ENSBTAG00000000267;ENSBTAG00000000283;ENSBTAG00000000322;ENSBTAG00000000332;…
Cellular Component	GO:0043228	non-membrane-bounded organelle	1227	3768	2.89695e-48	1.62833e-46	ENSBTAG00000000014;ENSBTAG00000000022;ENSBTAG00000000023;ENSBTAG00000000030;ENSBTAG00000000039;ENSBTAG00000000064;ENSBTAG00000000080;ENSBTAG00000000098;ENSBTAG00000000113;ENSBTAG00000000131;ENSBTAG00000000146;ENSBTAG00000000162;ENSBTAG00000000241;ENSBTAG00000000252;ENSBTAG00000000260;ENSBTAG00000000267;ENSBTAG00000000288;ENSBTAG00000000322;ENSBTAG00000000347;ENSBTAG00000000369;ENSBTAG00000000371;…
Cellular Component	GO:0043232	intracellular non-membrane-bounded organelle	1227	3768	2.89695e-48	1.62833e-46	ENSBTAG00000000014;ENSBTAG00000000022;ENSBTAG00000000023;ENSBTAG00000000030;ENSBTAG00000000039;ENSBTAG00000000064;ENSBTAG00000000080;ENSBTAG00000000098;ENSBTAG00000000113;ENSBTAG00000000131;ENSBTAG00000000146;ENSBTAG00000000162;ENSBTAG00000000241;ENSBTAG00000000252;ENSBTAG00000000260;ENSBTAG00000000267;ENSBTAG00000000288;ENSBTAG00000000322;ENSBTAG00000000347;ENSBTAG00000000369;ENSBTAG00000000371;…
Cellular Component	GO:0043234	protein complex	1206	3719	3.59511e-46	1.86531e-44	ENSBTAG00000000021;ENSBTAG00000000022;ENSBTAG00000000023;ENSBTAG00000000039;ENSBTAG00000000087;ENSBTAG00000000088;ENSBTAG00000000131;ENSBTAG00000000152;ENSBTAG00000000162;ENSBTAG00000000203;ENSBTAG00000000215;ENSBTAG00000000231;ENSBTAG00000000252;ENSBTAG00000000267;ENSBTAG00000000283;ENSBTAG00000000288;ENSBTAG00000000305;ENSBTAG00000000320;ENSBTAG00000000322;ENSBTAG00000000340;ENSBTAG00000000369;…
Cellular Component	GO:0005654	nucleoplasm	1175	2992	1.58571e-102	1.25831e-100	ENSBTAG00000000013;ENSBTAG00000000022;ENSBTAG00000000023;ENSBTAG00000000039;ENSBTAG00000000064;ENSBTAG00000000080;ENSBTAG00000000081;ENSBTAG00000000092;ENSBTAG00000000098;ENSBTAG00000000131;ENSBTAG00000000152;ENSBTAG00000000222;ENSBTAG00000000224;ENSBTAG00000000252;ENSBTAG00000000260;ENSBTAG00000000283;ENSBTAG00000000332;ENSBTAG00000000375;ENSBTAG00000000382;ENSBTAG00000000385;ENSBTAG00000000415;…
Cellular Component	GO:0012505	endomembrane system	1060	2833	6.92328e-76	4.66975e-74	ENSBTAG00000000022;ENSBTAG00000000025;ENSBTAG00000000073;ENSBTAG00000000078;ENSBTAG00000000081;ENSBTAG00000000087;ENSBTAG00000000099;ENSBTAG00000000113;ENSBTAG00000000152;ENSBTAG00000000184;ENSBTAG00000000205;ENSBTAG00000000241;ENSBTAG00000000274;ENSBTAG00000000279;ENSBTAG00000000312;ENSBTAG00000000320;ENSBTAG00000000321;ENSBTAG00000000342;ENSBTAG00000000379;ENSBTAG00000000390;ENSBTAG00000000393;…
Cellular Component	GO:0005829	cytosol	1051	2880	4.60107e-68	2.95564e-66	ENSBTAG00000000013;ENSBTAG00000000025;ENSBTAG00000000030;ENSBTAG00000000080;ENSBTAG00000000081;ENSBTAG00000000092;ENSBTAG00000000147;ENSBTAG00000000149;ENSBTAG00000000162;ENSBTAG00000000163;ENSBTAG00000000184;ENSBTAG00000000203;ENSBTAG00000000222;ENSBTAG00000000224;ENSBTAG00000000241;ENSBTAG00000000267;ENSBTAG00000000274;ENSBTAG00000000288;ENSBTAG00000000296;ENSBTAG00000000317;ENSBTAG00000000320;…
Cellular Component	GO:0031090	organelle membrane	696	1973	5.7276e-37	2.86168e-35	ENSBTAG00000000025;ENSBTAG00000000078;ENSBTAG00000000087;ENSBTAG00000000099;ENSBTAG00000000152;ENSBTAG00000000184;ENSBTAG00000000203;ENSBTAG00000000260;ENSBTAG00000000279;ENSBTAG00000000320;ENSBTAG00000000342;ENSBTAG00000000379;ENSBTAG00000000390;ENSBTAG00000000417;ENSBTAG00000000428;ENSBTAG00000000550;ENSBTAG00000000562;ENSBTAG00000000705;ENSBTAG00000000710;ENSBTAG00000000711;ENSBTAG00000000764;…
Cellular Component	GO:0005856	cytoskeleton	552	1705	3.86996e-19	1.33861e-17	ENSBTAG00000000113;ENSBTAG00000000146;ENSBTAG00000000322;ENSBTAG00000000347;ENSBTAG00000000371;ENSBTAG00000000458;ENSBTAG00000000526;ENSBTAG00000000545;ENSBTAG00000000630;ENSBTAG00000000660;ENSBTAG00000000687;ENSBTAG00000000700;ENSBTAG00000000711;ENSBTAG00000000738;ENSBTAG00000000746;ENSBTAG00000000752;ENSBTAG00000000754;ENSBTAG00000000833;ENSBTAG00000000836;ENSBTAG00000001050;ENSBTAG00000001069;…
Cellular Component	GO:0098588	bounding membrane of organelle	520	1406	5.23929e-33	2.43717e-31	ENSBTAG00000000025;ENSBTAG00000000078;ENSBTAG00000000087;ENSBTAG00000000099;ENSBTAG00000000184;ENSBTAG00000000203;ENSBTAG00000000279;ENSBTAG00000000320;ENSBTAG00000000342;ENSBTAG00000000379;ENSBTAG00000000390;ENSBTAG00000000428;ENSBTAG00000000562;ENSBTAG00000000710;ENSBTAG00000000711;ENSBTAG00000000807;ENSBTAG00000000830;ENSBTAG00000000878;ENSBTAG00000000948;ENSBTAG00000000985;ENSBTAG00000001165;…
Cellular Component	GO:0098805	whole membrane	436	1374	1.32739e-13	3.44356e-12	ENSBTAG00000000113;ENSBTAG00000000152;ENSBTAG00000000203;ENSBTAG00000000231;ENSBTAG00000000320;ENSBTAG00000000369;ENSBTAG00000000415;ENSBTAG00000000428;ENSBTAG00000000469;ENSBTAG00000000497;ENSBTAG00000000562;ENSBTAG00000000668;ENSBTAG00000000710;ENSBTAG00000000711;ENSBTAG00000000717;ENSBTAG00000000736;ENSBTAG00000000806;ENSBTAG00000000807;ENSBTAG00000000830;ENSBTAG00000000836;ENSBTAG00000000878;…
Cellular Component	GO:0044451	nucleoplasm part	431	992	7.78272e-47	4.19955e-45	ENSBTAG00000000013;ENSBTAG00000000023;ENSBTAG00000000039;ENSBTAG00000000131;ENSBTAG00000000224;ENSBTAG00000000252;ENSBTAG00000000283;ENSBTAG00000000375;ENSBTAG00000000382;ENSBTAG00000000385;ENSBTAG00000000415;ENSBTAG00000000526;ENSBTAG00000000545;ENSBTAG00000000579;ENSBTAG00000000625;ENSBTAG00000000642;ENSBTAG00000000662;ENSBTAG00000000746;ENSBTAG00000000837;ENSBTAG00000000902;ENSBTAG00000000978;…
Cellular Component	GO:0005783	endoplasmic reticulum	427	1123	5.80926e-30	2.44897e-28	ENSBTAG00000000073;ENSBTAG00000000087;ENSBTAG00000000099;ENSBTAG00000000184;ENSBTAG00000000241;ENSBTAG00000000274;ENSBTAG00000000312;ENSBTAG00000000321;ENSBTAG00000000342;ENSBTAG00000000379;ENSBTAG00000000428;ENSBTAG00000000446;ENSBTAG00000000555;ENSBTAG00000000613;ENSBTAG00000000666;ENSBTAG00000000675;ENSBTAG00000000717;ENSBTAG00000000807;ENSBTAG00000000944;ENSBTAG00000000985;ENSBTAG00000001027;…
Cellular Component	GO:0044430	cytoskeletal part	414	1319	3.469e-12	8.06842e-11	ENSBTAG00000000113;ENSBTAG00000000322;ENSBTAG00000000371;ENSBTAG00000000458;ENSBTAG00000000545;ENSBTAG00000000630;ENSBTAG00000000660;ENSBTAG00000000687;ENSBTAG00000000711;ENSBTAG00000000746;ENSBTAG00000000752;ENSBTAG00000000754;ENSBTAG00000000836;ENSBTAG00000001050;ENSBTAG00000001069;ENSBTAG00000001081;ENSBTAG00000001182;ENSBTAG00000001332;ENSBTAG00000001349;ENSBTAG00000001352;ENSBTAG00000001463;…
Cellular Component	GO:0005794	Golgi apparatus	411	1029	2.90977e-34	1.40189e-32	ENSBTAG00000000025;ENSBTAG00000000073;ENSBTAG00000000078;ENSBTAG00000000081;ENSBTAG00000000113;ENSBTAG00000000205;ENSBTAG00000000274;ENSBTAG00000000279;ENSBTAG00000000312;ENSBTAG00000000342;ENSBTAG00000000379;ENSBTAG00000000390;ENSBTAG00000000446;ENSBTAG00000000555;ENSBTAG00000000625;ENSBTAG00000000678;ENSBTAG00000000807;ENSBTAG00000000944;ENSBTAG00000000948;ENSBTAG00000000985;ENSBTAG00000001013;…
Cellular Component	GO:1902494	catalytic complex	408	1068	4.10751e-29	1.6791e-27	ENSBTAG00000000023;ENSBTAG00000000087;ENSBTAG00000000131;ENSBTAG00000000162;ENSBTAG00000000215;ENSBTAG00000000252;ENSBTAG00000000446;ENSBTAG00000000458;ENSBTAG00000000469;ENSBTAG00000000501;ENSBTAG00000000545;ENSBTAG00000000579;ENSBTAG00000000590;ENSBTAG00000000599;ENSBTAG00000000642;ENSBTAG00000000746;ENSBTAG00000000753;ENSBTAG00000000754;ENSBTAG00000000856;ENSBTAG00000000878;ENSBTAG00000000902;…
Cellular Component	GO:0005739	mitochondrion	389	1308	2.65259e-08	4.52955e-07	ENSBTAG00000000014;ENSBTAG00000000042;ENSBTAG00000000064;ENSBTAG00000000081;ENSBTAG00000000094;ENSBTAG00000000152;ENSBTAG00000000163;ENSBTAG00000000222;ENSBTAG00000000274;ENSBTAG00000000291;ENSBTAG00000000417;ENSBTAG00000000428;ENSBTAG00000000434;ENSBTAG00000000455;ENSBTAG00000000550;ENSBTAG00000000555;ENSBTAG00000000562;ENSBTAG00000000647;ENSBTAG00000000705;ENSBTAG00000000808;ENSBTAG00000000837;…
Cellular Component	GO:0005694	chromosome	357	933	1.24805e-25	4.81034e-24	ENSBTAG00000000022;ENSBTAG00000000023;ENSBTAG00000000039;ENSBTAG00000000064;ENSBTAG00000000098;ENSBTAG00000000162;ENSBTAG00000000252;ENSBTAG00000000372;ENSBTAG00000000375;ENSBTAG00000000385;ENSBTAG00000000469;ENSBTAG00000000526;ENSBTAG00000000579;ENSBTAG00000000590;ENSBTAG00000000629;ENSBTAG00000000647;ENSBTAG00000000746;ENSBTAG00000000752;ENSBTAG00000000837;ENSBTAG00000001024;ENSBTAG00000001042;…
Cellular Component	GO:0015630	microtubule cytoskeleton	344	1011	2.1621e-15	6.34059e-14	ENSBTAG00000000113;ENSBTAG00000000322;ENSBTAG00000000371;ENSBTAG00000000458;ENSBTAG00000000545;ENSBTAG00000000630;ENSBTAG00000000660;ENSBTAG00000000687;ENSBTAG00000000711;ENSBTAG00000000746;ENSBTAG00000000752;ENSBTAG00000000754;ENSBTAG00000001069;ENSBTAG00000001182;ENSBTAG00000001349;ENSBTAG00000001352;ENSBTAG00000001403;ENSBTAG00000001463;ENSBTAG00000001489;ENSBTAG00000001564;ENSBTAG00000001575;…
Cellular Component	GO:0044427	chromosomal part	310	815	7.56931e-22	2.83639e-20	ENSBTAG00000000022;ENSBTAG00000000023;ENSBTAG00000000039;ENSBTAG00000000064;ENSBTAG00000000162;ENSBTAG00000000252;ENSBTAG00000000372;ENSBTAG00000000385;ENSBTAG00000000469;ENSBTAG00000000579;ENSBTAG00000000590;ENSBTAG00000000629;ENSBTAG00000000746;ENSBTAG00000000752;ENSBTAG00000000837;ENSBTAG00000001024;ENSBTAG00000001042;ENSBTAG00000001069;ENSBTAG00000001071;ENSBTAG00000001161;ENSBTAG00000001182;…
Cellular Component	GO:0031982	vesicle	307	937	1.37817e-11	3.04779e-10	ENSBTAG00000000025;ENSBTAG00000000113;ENSBTAG00000000260;ENSBTAG00000000322;ENSBTAG00000000347;ENSBTAG00000000393;ENSBTAG00000000460;ENSBTAG00000000764;ENSBTAG00000000778;ENSBTAG00000000807;ENSBTAG00000000985;ENSBTAG00000001013;ENSBTAG00000001105;ENSBTAG00000001244;ENSBTAG00000001332;ENSBTAG00000001394;ENSBTAG00000001483;ENSBTAG00000001632;ENSBTAG00000001657;ENSBTAG00000001662;ENSBTAG00000001673;…
Cellular Component	GO:0005730	nucleolus	306	728	4.88476e-30	2.12566e-28	ENSBTAG00000000014;ENSBTAG00000000030;ENSBTAG00000000039;ENSBTAG00000000064;ENSBTAG00000000080;ENSBTAG00000000131;ENSBTAG00000000260;ENSBTAG00000000267;ENSBTAG00000000322;ENSBTAG00000000382;ENSBTAG00000000396;ENSBTAG00000000699;ENSBTAG00000000705;ENSBTAG00000000833;ENSBTAG00000000837;ENSBTAG00000000957;ENSBTAG00000001013;ENSBTAG00000001069;ENSBTAG00000001311;ENSBTAG00000001328;ENSBTAG00000001342;…
Cellular Component	GO:1990904	ribonucleoprotein complex	290	965	6.59288e-07	8.29351e-06	ENSBTAG00000000241;ENSBTAG00000000267;ENSBTAG00000000288;ENSBTAG00000000417;ENSBTAG00000000613;ENSBTAG00000000630;ENSBTAG00000000683;ENSBTAG00000000950;ENSBTAG00000001016;ENSBTAG00000001035;ENSBTAG00000001071;ENSBTAG00000001134;ENSBTAG00000001171;ENSBTAG00000001174;ENSBTAG00000001199;ENSBTAG00000001289;ENSBTAG00000001328;ENSBTAG00000001342;ENSBTAG00000001419;ENSBTAG00000001468;ENSBTAG00000001489;…
Cellular Component	GO:1990234	transferase complex	288	698	1.00698e-26	3.99533e-25	ENSBTAG00000000023;ENSBTAG00000000087;ENSBTAG00000000131;ENSBTAG00000000162;ENSBTAG00000000252;ENSBTAG00000000501;ENSBTAG00000000579;ENSBTAG00000000590;ENSBTAG00000000599;ENSBTAG00000000642;ENSBTAG00000000746;ENSBTAG00000000753;ENSBTAG00000000856;ENSBTAG00000000878;ENSBTAG00000000902;ENSBTAG00000000978;ENSBTAG00000001016;ENSBTAG00000001069;ENSBTAG00000001107;ENSBTAG00000001144;ENSBTAG00000001168;…
Cellular Component	GO:0031967	organelle envelope	277	816	1.88926e-12	4.47124e-11	ENSBTAG00000000022;ENSBTAG00000000152;ENSBTAG00000000417;ENSBTAG00000000428;ENSBTAG00000000550;ENSBTAG00000000562;ENSBTAG00000000705;ENSBTAG00000000837;ENSBTAG00000000878;ENSBTAG00000000902;ENSBTAG00000001061;ENSBTAG00000001105;ENSBTAG00000001107;ENSBTAG00000001108;ENSBTAG00000001165;ENSBTAG00000001168;ENSBTAG00000001174;ENSBTAG00000001289;ENSBTAG00000001353;ENSBTAG00000001419;ENSBTAG00000001435;…
Cellular Component	GO:0031975	envelope	277	816	1.88926e-12	4.47124e-11	ENSBTAG00000000022;ENSBTAG00000000152;ENSBTAG00000000417;ENSBTAG00000000428;ENSBTAG00000000550;ENSBTAG00000000562;ENSBTAG00000000705;ENSBTAG00000000837;ENSBTAG00000000878;ENSBTAG00000000902;ENSBTAG00000001061;ENSBTAG00000001105;ENSBTAG00000001107;ENSBTAG00000001108;ENSBTAG00000001165;ENSBTAG00000001168;ENSBTAG00000001174;ENSBTAG00000001289;ENSBTAG00000001353;ENSBTAG00000001419;ENSBTAG00000001435;…
Cellular Component	GO:0016604	nuclear body	275	625	6.15256e-31	2.7666e-29	ENSBTAG00000000013;ENSBTAG00000000023;ENSBTAG00000000039;ENSBTAG00000000224;ENSBTAG00000000283;ENSBTAG00000000385;ENSBTAG00000000415;ENSBTAG00000000526;ENSBTAG00000000545;ENSBTAG00000000625;ENSBTAG00000000662;ENSBTAG00000000837;ENSBTAG00000001014;ENSBTAG00000001035;ENSBTAG00000001069;ENSBTAG00000001071;ENSBTAG00000001126;ENSBTAG00000001225;ENSBTAG00000001332;ENSBTAG00000001415;ENSBTAG00000001463;…
Cellular Component	GO:0098796	membrane protein complex	270	1002	0.00414441	0.0217541	ENSBTAG00000000087;ENSBTAG00000000088;ENSBTAG00000000203;ENSBTAG00000000215;ENSBTAG00000000320;ENSBTAG00000000369;ENSBTAG00000000393;ENSBTAG00000000428;ENSBTAG00000000550;ENSBTAG00000000562;ENSBTAG00000000807;ENSBTAG00000001189;ENSBTAG00000001246;ENSBTAG00000001352;ENSBTAG00000001407;ENSBTAG00000001460;ENSBTAG00000001575;ENSBTAG00000001592;ENSBTAG00000001654;ENSBTAG00000001657;ENSBTAG00000001781;…
Cellular Component	GO:0031410	cytoplasmic vesicle	259	804	3.6453e-09	6.73632e-08	ENSBTAG00000000025;ENSBTAG00000000260;ENSBTAG00000000347;ENSBTAG00000000393;ENSBTAG00000000460;ENSBTAG00000000764;ENSBTAG00000000778;ENSBTAG00000000807;ENSBTAG00000000985;ENSBTAG00000001013;ENSBTAG00000001244;ENSBTAG00000001332;ENSBTAG00000001394;ENSBTAG00000001483;ENSBTAG00000001632;ENSBTAG00000001657;ENSBTAG00000001662;ENSBTAG00000001673;ENSBTAG00000001700;ENSBTAG00000001822;ENSBTAG00000001829;…
Cellular Component	GO:0030529	intracellular ribonucleoprotein complex	256	870	1.66591e-05	0.000162849	ENSBTAG00000000241;ENSBTAG00000000267;ENSBTAG00000000288;ENSBTAG00000000417;ENSBTAG00000000613;ENSBTAG00000000630;ENSBTAG00000000683;ENSBTAG00000000950;ENSBTAG00000001016;ENSBTAG00000001035;ENSBTAG00000001071;ENSBTAG00000001171;ENSBTAG00000001174;ENSBTAG00000001199;ENSBTAG00000001289;ENSBTAG00000001328;ENSBTAG00000001342;ENSBTAG00000001419;ENSBTAG00000001468;ENSBTAG00000001489;ENSBTAG00000001504;…
Cellular Component	GO:0005768	endosome	243	604	6.28549e-21	2.29166e-19	ENSBTAG00000000073;ENSBTAG00000000274;ENSBTAG00000000320;ENSBTAG00000000411;ENSBTAG00000000446;ENSBTAG00000000616;ENSBTAG00000000710;ENSBTAG00000000711;ENSBTAG00000000717;ENSBTAG00000000985;ENSBTAG00000001015;ENSBTAG00000001050;ENSBTAG00000001181;ENSBTAG00000001269;ENSBTAG00000001352;ENSBTAG00000001403;ENSBTAG00000001489;ENSBTAG00000001632;ENSBTAG00000001657;ENSBTAG00000001659;ENSBTAG00000001662;…
Cellular Component	GO:0044432	endoplasmic reticulum part	241	613	2.99566e-19	1.06346e-17	ENSBTAG00000000073;ENSBTAG00000000087;ENSBTAG00000000099;ENSBTAG00000000184;ENSBTAG00000000342;ENSBTAG00000000807;ENSBTAG00000000985;ENSBTAG00000001116;ENSBTAG00000001212;ENSBTAG00000001398;ENSBTAG00000001420;ENSBTAG00000001548;ENSBTAG00000001592;ENSBTAG00000001607;ENSBTAG00000001928;ENSBTAG00000002052;ENSBTAG00000002220;ENSBTAG00000002296;ENSBTAG00000002313;ENSBTAG00000002404;ENSBTAG00000002791;…
Cellular Component	GO:0031988	membrane-bounded vesicle	231	713	1.5299e-08	2.71557e-07	ENSBTAG00000000025;ENSBTAG00000000260;ENSBTAG00000000393;ENSBTAG00000000460;ENSBTAG00000000764;ENSBTAG00000000778;ENSBTAG00000000807;ENSBTAG00000000985;ENSBTAG00000001013;ENSBTAG00000001105;ENSBTAG00000001244;ENSBTAG00000001332;ENSBTAG00000001394;ENSBTAG00000001483;ENSBTAG00000001657;ENSBTAG00000001662;ENSBTAG00000001673;ENSBTAG00000001700;ENSBTAG00000001822;ENSBTAG00000001829;ENSBTAG00000001887;…
Cellular Component	GO:0098589	membrane region	221	783	0.000829489	0.0055949	ENSBTAG00000000113;ENSBTAG00000000152;ENSBTAG00000000231;ENSBTAG00000000369;ENSBTAG00000000415;ENSBTAG00000000469;ENSBTAG00000000497;ENSBTAG00000000668;ENSBTAG00000000717;ENSBTAG00000000736;ENSBTAG00000000806;ENSBTAG00000000836;ENSBTAG00000000894;ENSBTAG00000000898;ENSBTAG00000001013;ENSBTAG00000001027;ENSBTAG00000001050;ENSBTAG00000001246;ENSBTAG00000001332;ENSBTAG00000001400;ENSBTAG00000001403;…
Cellular Component	GO:0005815	microtubule organizing center	213	637	3.19722e-09	5.99034e-08	ENSBTAG00000000322;ENSBTAG00000000371;ENSBTAG00000000458;ENSBTAG00000000545;ENSBTAG00000000687;ENSBTAG00000000711;ENSBTAG00000000746;ENSBTAG00000000752;ENSBTAG00000000754;ENSBTAG00000001069;ENSBTAG00000001352;ENSBTAG00000001564;ENSBTAG00000001575;ENSBTAG00000001602;ENSBTAG00000001634;ENSBTAG00000001673;ENSBTAG00000001700;ENSBTAG00000001717;ENSBTAG00000001736;ENSBTAG00000001822;ENSBTAG00000001848;…
Cellular Component	GO:0042175	nuclear outer membrane-endoplasmic reticulum membrane network	212	547	2.8868e-16	8.85067e-15	ENSBTAG00000000087;ENSBTAG00000000099;ENSBTAG00000000152;ENSBTAG00000000184;ENSBTAG00000000342;ENSBTAG00000000807;ENSBTAG00000000985;ENSBTAG00000001212;ENSBTAG00000001398;ENSBTAG00000001420;ENSBTAG00000001548;ENSBTAG00000001592;ENSBTAG00000001607;ENSBTAG00000002052;ENSBTAG00000002220;ENSBTAG00000002296;ENSBTAG00000002313;ENSBTAG00000002404;ENSBTAG00000002791;ENSBTAG00000002988;ENSBTAG00000003038;…
Cellular Component	GO:0016023	cytoplasmic, membrane-bounded vesicle	209	649	1.25077e-07	1.82588e-06	ENSBTAG00000000025;ENSBTAG00000000260;ENSBTAG00000000393;ENSBTAG00000000460;ENSBTAG00000000764;ENSBTAG00000000778;ENSBTAG00000000807;ENSBTAG00000000985;ENSBTAG00000001013;ENSBTAG00000001244;ENSBTAG00000001332;ENSBTAG00000001394;ENSBTAG00000001483;ENSBTAG00000001657;ENSBTAG00000001662;ENSBTAG00000001673;ENSBTAG00000001700;ENSBTAG00000001822;ENSBTAG00000001829;ENSBTAG00000001887;ENSBTAG00000001928;…
Cellular Component	GO:0030054	cell junction	209	677	3.57049e-06	3.73379e-05	ENSBTAG00000000031;ENSBTAG00000000113;ENSBTAG00000000224;ENSBTAG00000000322;ENSBTAG00000000357;ENSBTAG00000000415;ENSBTAG00000000700;ENSBTAG00000000711;ENSBTAG00000000815;ENSBTAG00000000836;ENSBTAG00000001081;ENSBTAG00000001460;ENSBTAG00000001468;ENSBTAG00000001473;ENSBTAG00000001498;ENSBTAG00000001654;ENSBTAG00000001700;ENSBTAG00000001736;ENSBTAG00000001776;ENSBTAG00000001827;ENSBTAG00000002029;…
Cellular Component	GO:0005789	endoplasmic reticulum membrane	201	531	2.81288e-14	7.58915e-13	ENSBTAG00000000087;ENSBTAG00000000099;ENSBTAG00000000184;ENSBTAG00000000342;ENSBTAG00000000807;ENSBTAG00000000985;ENSBTAG00000001212;ENSBTAG00000001398;ENSBTAG00000001420;ENSBTAG00000001548;ENSBTAG00000001592;ENSBTAG00000001607;ENSBTAG00000002052;ENSBTAG00000002220;ENSBTAG00000002296;ENSBTAG00000002313;ENSBTAG00000002404;ENSBTAG00000002791;ENSBTAG00000002988;ENSBTAG00000003038;ENSBTAG00000003068;…
Cellular Component	GO:0044431	Golgi apparatus part	199	491	9.63798e-18	3.17113e-16	ENSBTAG00000000025;ENSBTAG00000000078;ENSBTAG00000000279;ENSBTAG00000000342;ENSBTAG00000000379;ENSBTAG00000000390;ENSBTAG00000000446;ENSBTAG00000000807;ENSBTAG00000000948;ENSBTAG00000001269;ENSBTAG00000001533;ENSBTAG00000001546;ENSBTAG00000001665;ENSBTAG00000001692;ENSBTAG00000001700;ENSBTAG00000001744;ENSBTAG00000001977;ENSBTAG00000002010;ENSBTAG00000002303;ENSBTAG00000002352;ENSBTAG00000002393;…
Cellular Component	GO:0005813	centrosome	195	551	7.99337e-11	1.7116e-09	ENSBTAG00000000322;ENSBTAG00000000371;ENSBTAG00000000458;ENSBTAG00000000545;ENSBTAG00000000687;ENSBTAG00000000711;ENSBTAG00000000746;ENSBTAG00000000752;ENSBTAG00000000754;ENSBTAG00000001069;ENSBTAG00000001352;ENSBTAG00000001564;ENSBTAG00000001575;ENSBTAG00000001602;ENSBTAG00000001634;ENSBTAG00000001673;ENSBTAG00000001700;ENSBTAG00000001717;ENSBTAG00000001736;ENSBTAG00000001822;ENSBTAG00000001848;…
Cellular Component	GO:0044429	mitochondrial part	187	688	0.0107738	0.0515387	ENSBTAG00000000417;ENSBTAG00000000428;ENSBTAG00000000550;ENSBTAG00000000562;ENSBTAG00000000705;ENSBTAG00000000902;ENSBTAG00000001044;ENSBTAG00000001061;ENSBTAG00000001069;ENSBTAG00000001165;ENSBTAG00000001174;ENSBTAG00000001199;ENSBTAG00000001289;ENSBTAG00000001353;ENSBTAG00000001419;ENSBTAG00000001475;ENSBTAG00000001632;ENSBTAG00000001781;ENSBTAG00000001832;ENSBTAG00000002295;ENSBTAG00000002296;…
Cellular Component	GO:0000785	chromatin	171	512	1.25876e-07	1.82588e-06	ENSBTAG00000000023;ENSBTAG00000000039;ENSBTAG00000000372;ENSBTAG00000000385;ENSBTAG00000000579;ENSBTAG00000001024;ENSBTAG00000001042;ENSBTAG00000001069;ENSBTAG00000001161;ENSBTAG00000001529;ENSBTAG00000001731;ENSBTAG00000002078;ENSBTAG00000002095;ENSBTAG00000002175;ENSBTAG00000002224;ENSBTAG00000002260;ENSBTAG00000002295;ENSBTAG00000002345;ENSBTAG00000002586;ENSBTAG00000002590;ENSBTAG00000002736;…
Cellular Component	GO:0048471	perinuclear region of cytoplasm	156	377	4.23883e-15	1.21663e-13	ENSBTAG00000000081;ENSBTAG00000000092;ENSBTAG00000000283;ENSBTAG00000000711;ENSBTAG00000000771;ENSBTAG00000000817;ENSBTAG00000001017;ENSBTAG00000001105;ENSBTAG00000001657;ENSBTAG00000001659;ENSBTAG00000001662;ENSBTAG00000001776;ENSBTAG00000002296;ENSBTAG00000002633;ENSBTAG00000002643;ENSBTAG00000002734;ENSBTAG00000002745;ENSBTAG00000002784;ENSBTAG00000002918;ENSBTAG00000002977;ENSBTAG00000003089;…
Cellular Component	GO:0005773	vacuole	153	418	6.07122e-10	1.20442e-08	ENSBTAG00000000203;ENSBTAG00000000411;ENSBTAG00000000704;ENSBTAG00000000830;ENSBTAG00000000878;ENSBTAG00000001181;ENSBTAG00000001269;ENSBTAG00000001548;ENSBTAG00000001632;ENSBTAG00000001700;ENSBTAG00000001752;ENSBTAG00000002014;ENSBTAG00000002296;ENSBTAG00000002493;ENSBTAG00000002747;ENSBTAG00000002854;ENSBTAG00000003001;ENSBTAG00000003232;ENSBTAG00000003450;ENSBTAG00000003695;ENSBTAG00000003928;…
Cellular Component	GO:0015629	actin cytoskeleton	150	398	7.96353e-11	1.7116e-09	ENSBTAG00000000322;ENSBTAG00000000526;ENSBTAG00000000700;ENSBTAG00000000738;ENSBTAG00000000746;ENSBTAG00000000833;ENSBTAG00000001081;ENSBTAG00000001332;ENSBTAG00000001774;ENSBTAG00000001987;ENSBTAG00000002082;ENSBTAG00000002539;ENSBTAG00000002608;ENSBTAG00000002633;ENSBTAG00000002693;ENSBTAG00000002970;ENSBTAG00000002996;ENSBTAG00000003166;ENSBTAG00000003191;ENSBTAG00000003401;ENSBTAG00000003825;…
Cellular Component	GO:0005740	mitochondrial envelope	145	528	0.0160159	0.0679417	ENSBTAG00000000417;ENSBTAG00000000428;ENSBTAG00000000550;ENSBTAG00000000562;ENSBTAG00000000705;ENSBTAG00000000902;ENSBTAG00000001061;ENSBTAG00000001165;ENSBTAG00000001174;ENSBTAG00000001289;ENSBTAG00000001353;ENSBTAG00000001419;ENSBTAG00000001475;ENSBTAG00000001632;ENSBTAG00000001781;ENSBTAG00000001832;ENSBTAG00000002295;ENSBTAG00000002296;ENSBTAG00000002404;ENSBTAG00000002412;ENSBTAG00000003294;…
Cellular Component	GO:0000139	Golgi membrane	140	333	2.45269e-14	6.89308e-13	ENSBTAG00000000025;ENSBTAG00000000078;ENSBTAG00000000279;ENSBTAG00000000379;ENSBTAG00000000390;ENSBTAG00000000807;ENSBTAG00000000948;ENSBTAG00000001269;ENSBTAG00000001533;ENSBTAG00000001546;ENSBTAG00000001665;ENSBTAG00000001692;ENSBTAG00000001744;ENSBTAG00000002303;ENSBTAG00000002393;ENSBTAG00000002768;ENSBTAG00000002769;ENSBTAG00000002939;ENSBTAG00000002993;ENSBTAG00000003052;ENSBTAG00000003109;…
Cellular Component	GO:0016607	nuclear speck	138	306	3.64709e-17	1.17141e-15	ENSBTAG00000000013;ENSBTAG00000000039;ENSBTAG00000000385;ENSBTAG00000000415;ENSBTAG00000000545;ENSBTAG00000001126;ENSBTAG00000001225;ENSBTAG00000001415;ENSBTAG00000001528;ENSBTAG00000002086;ENSBTAG00000002098;ENSBTAG00000002175;ENSBTAG00000002279;ENSBTAG00000002345;ENSBTAG00000002586;ENSBTAG00000002745;ENSBTAG00000002830;ENSBTAG00000003094;ENSBTAG00000003789;ENSBTAG00000003851;ENSBTAG00000003866;…
Cellular Component	GO:0031966	mitochondrial membrane	136	493	0.0165693	0.0696322	ENSBTAG00000000417;ENSBTAG00000000428;ENSBTAG00000000550;ENSBTAG00000000562;ENSBTAG00000000705;ENSBTAG00000000902;ENSBTAG00000001061;ENSBTAG00000001165;ENSBTAG00000001174;ENSBTAG00000001289;ENSBTAG00000001353;ENSBTAG00000001419;ENSBTAG00000001475;ENSBTAG00000001781;ENSBTAG00000001832;ENSBTAG00000002295;ENSBTAG00000002296;ENSBTAG00000002404;ENSBTAG00000002412;ENSBTAG00000003294;ENSBTAG00000003307;…
Cellular Component	GO:0005635	nuclear envelope	134	295	5.05275e-17	1.58515e-15	ENSBTAG00000000022;ENSBTAG00000000152;ENSBTAG00000000837;ENSBTAG00000000878;ENSBTAG00000001105;ENSBTAG00000001107;ENSBTAG00000001108;ENSBTAG00000001168;ENSBTAG00000001435;ENSBTAG00000001463;ENSBTAG00000001470;ENSBTAG00000001552;ENSBTAG00000001749;ENSBTAG00000002402;ENSBTAG00000002458;ENSBTAG00000002501;ENSBTAG00000002835;ENSBTAG00000002837;ENSBTAG00000002988;ENSBTAG00000003044;ENSBTAG00000003116;…
Cellular Component	GO:0031252	cell leading edge	118	269	7.92713e-14	2.0968e-12	ENSBTAG00000000113;ENSBTAG00000000210;ENSBTAG00000000305;ENSBTAG00000000322;ENSBTAG00000000369;ENSBTAG00000000700;ENSBTAG00000000815;ENSBTAG00000000897;ENSBTAG00000001017;ENSBTAG00000001081;ENSBTAG00000001400;ENSBTAG00000001673;ENSBTAG00000001700;ENSBTAG00000001788;ENSBTAG00000002014;ENSBTAG00000002190;ENSBTAG00000002727;ENSBTAG00000003191;ENSBTAG00000003401;ENSBTAG00000003566;ENSBTAG00000004554;…
Cellular Component	GO:0005819	spindle	118	277	9.1728e-13	2.24984e-11	ENSBTAG00000000630;ENSBTAG00000000660;ENSBTAG00000000687;ENSBTAG00000000752;ENSBTAG00000001182;ENSBTAG00000001463;ENSBTAG00000001575;ENSBTAG00000001700;ENSBTAG00000001717;ENSBTAG00000001776;ENSBTAG00000001848;ENSBTAG00000002072;ENSBTAG00000002331;ENSBTAG00000002726;ENSBTAG00000003215;ENSBTAG00000003314;ENSBTAG00000003908;ENSBTAG00000004051;ENSBTAG00000004416;ENSBTAG00000004448;ENSBTAG00000004887;…
Cellular Component	GO:0000323	lytic vacuole	116	334	1.57823e-06	1.75953e-05	ENSBTAG00000000203;ENSBTAG00000000411;ENSBTAG00000000704;ENSBTAG00000000830;ENSBTAG00000000878;ENSBTAG00000001181;ENSBTAG00000001269;ENSBTAG00000001632;ENSBTAG00000001752;ENSBTAG00000002014;ENSBTAG00000002493;ENSBTAG00000002747;ENSBTAG00000002854;ENSBTAG00000003001;ENSBTAG00000003695;ENSBTAG00000003935;ENSBTAG00000004307;ENSBTAG00000004334;ENSBTAG00000004436;ENSBTAG00000005622;ENSBTAG00000005668;…
Cellular Component	GO:0005764	lysosome	116	334	1.57823e-06	1.75953e-05	ENSBTAG00000000203;ENSBTAG00000000411;ENSBTAG00000000704;ENSBTAG00000000830;ENSBTAG00000000878;ENSBTAG00000001181;ENSBTAG00000001269;ENSBTAG00000001632;ENSBTAG00000001752;ENSBTAG00000002014;ENSBTAG00000002493;ENSBTAG00000002747;ENSBTAG00000002854;ENSBTAG00000003001;ENSBTAG00000003695;ENSBTAG00000003935;ENSBTAG00000004307;ENSBTAG00000004334;ENSBTAG00000004436;ENSBTAG00000005622;ENSBTAG00000005668;…
Cellular Component	GO:0098687	chromosomal region	115	233	3.84634e-18	1.29718e-16	ENSBTAG00000000022;ENSBTAG00000000064;ENSBTAG00000000162;ENSBTAG00000000469;ENSBTAG00000000746;ENSBTAG00000000752;ENSBTAG00000001182;ENSBTAG00000001415;ENSBTAG00000001463;ENSBTAG00000001717;ENSBTAG00000002073;ENSBTAG00000002078;ENSBTAG00000002260;ENSBTAG00000002613;ENSBTAG00000002655;ENSBTAG00000002718;ENSBTAG00000002736;ENSBTAG00000002918;ENSBTAG00000002960;ENSBTAG00000003314;ENSBTAG00000003354;…
Cellular Component	GO:0044440	endosomal part	115	265	3.99173e-13	9.97194e-12	ENSBTAG00000000320;ENSBTAG00000000411;ENSBTAG00000000710;ENSBTAG00000000711;ENSBTAG00000001269;ENSBTAG00000001659;ENSBTAG00000001662;ENSBTAG00000001822;ENSBTAG00000001887;ENSBTAG00000002014;ENSBTAG00000002352;ENSBTAG00000002402;ENSBTAG00000002493;ENSBTAG00000002643;ENSBTAG00000002658;ENSBTAG00000002966;ENSBTAG00000003001;ENSBTAG00000003474;ENSBTAG00000003935;ENSBTAG00000004131;ENSBTAG00000004307;…
Cellular Component	GO:0010008	endosome membrane	107	250	7.3982e-12	1.66336e-10	ENSBTAG00000000320;ENSBTAG00000000710;ENSBTAG00000000711;ENSBTAG00000001269;ENSBTAG00000001659;ENSBTAG00000001662;ENSBTAG00000001822;ENSBTAG00000001887;ENSBTAG00000002014;ENSBTAG00000002352;ENSBTAG00000002402;ENSBTAG00000002493;ENSBTAG00000002658;ENSBTAG00000002966;ENSBTAG00000003001;ENSBTAG00000003474;ENSBTAG00000003935;ENSBTAG00000004131;ENSBTAG00000004307;ENSBTAG00000004792;ENSBTAG00000005362;…
Cellular Component	GO:0070161	anchoring junction	102	246	2.05972e-10	4.27471e-09	ENSBTAG00000000031;ENSBTAG00000000357;ENSBTAG00000000700;ENSBTAG00000000711;ENSBTAG00000000815;ENSBTAG00000001081;ENSBTAG00000001460;ENSBTAG00000001473;ENSBTAG00000002350;ENSBTAG00000002374;ENSBTAG00000002391;ENSBTAG00000002411;ENSBTAG00000002485;ENSBTAG00000002651;ENSBTAG00000002941;ENSBTAG00000002996;ENSBTAG00000003245;ENSBTAG00000003418;ENSBTAG00000003727;ENSBTAG00000003908;ENSBTAG00000004672;…
Cellular Component	GO:0019866	organelle inner membrane	102	370	0.0345261	0.127256	ENSBTAG00000000417;ENSBTAG00000000550;ENSBTAG00000000705;ENSBTAG00000001174;ENSBTAG00000001289;ENSBTAG00000001353;ENSBTAG00000001419;ENSBTAG00000001435;ENSBTAG00000001475;ENSBTAG00000001781;ENSBTAG00000001832;ENSBTAG00000002835;ENSBTAG00000003294;ENSBTAG00000003307;ENSBTAG00000003693;ENSBTAG00000003728;ENSBTAG00000003752;ENSBTAG00000003773;ENSBTAG00000003876;ENSBTAG00000004979;ENSBTAG00000005096;…
Cellular Component	GO:0099568	cytoplasmic region	100	242	3.87402e-10	7.80007e-09	ENSBTAG00000000137;ENSBTAG00000000347;ENSBTAG00000000369;ENSBTAG00000000764;ENSBTAG00000001182;ENSBTAG00000001400;ENSBTAG00000001673;ENSBTAG00000002082;ENSBTAG00000002280;ENSBTAG00000002313;ENSBTAG00000002432;ENSBTAG00000002608;ENSBTAG00000002633;ENSBTAG00000002996;ENSBTAG00000003265;ENSBTAG00000003397;ENSBTAG00000003566;ENSBTAG00000003908;ENSBTAG00000004072;ENSBTAG00000004383;ENSBTAG00000004413;…
Cellular Component	GO:0000151	ubiquitin ligase complex	99	245	1.9953e-09	3.79107e-08	ENSBTAG00000000023;ENSBTAG00000000162;ENSBTAG00000000501;ENSBTAG00000000856;ENSBTAG00000001107;ENSBTAG00000001168;ENSBTAG00000001425;ENSBTAG00000001827;ENSBTAG00000001937;ENSBTAG00000002236;ENSBTAG00000002697;ENSBTAG00000002726;ENSBTAG00000002796;ENSBTAG00000003186;ENSBTAG00000003219;ENSBTAG00000003421;ENSBTAG00000003500;ENSBTAG00000003798;ENSBTAG00000004147;ENSBTAG00000004161;ENSBTAG00000004603;…
Cellular Component	GO:0005667	transcription factor complex	99	309	0.000303524	0.00226218	ENSBTAG00000000305;ENSBTAG00000000340;ENSBTAG00000000382;ENSBTAG00000000392;ENSBTAG00000000602;ENSBTAG00000000625;ENSBTAG00000000837;ENSBTAG00000001069;ENSBTAG00000001225;ENSBTAG00000002072;ENSBTAG00000002129;ENSBTAG00000002422;ENSBTAG00000002586;ENSBTAG00000002835;ENSBTAG00000003460;ENSBTAG00000003971;ENSBTAG00000004021;ENSBTAG00000004037;ENSBTAG00000004154;ENSBTAG00000004322;ENSBTAG00000004368;…
Cellular Component	GO:0005912	adherens junction	98	235	3.18544e-10	6.51085e-09	ENSBTAG00000000031;ENSBTAG00000000357;ENSBTAG00000000700;ENSBTAG00000000711;ENSBTAG00000000815;ENSBTAG00000001081;ENSBTAG00000001460;ENSBTAG00000001473;ENSBTAG00000002350;ENSBTAG00000002374;ENSBTAG00000002391;ENSBTAG00000002411;ENSBTAG00000002485;ENSBTAG00000002651;ENSBTAG00000002941;ENSBTAG00000002996;ENSBTAG00000003245;ENSBTAG00000003418;ENSBTAG00000003727;ENSBTAG00000003908;ENSBTAG00000004672;…
Cellular Component	GO:0061695	transferase complex, transferring phosphorus-containing groups	98	247	7.4132e-09	1.35141e-07	ENSBTAG00000000252;ENSBTAG00000000579;ENSBTAG00000000590;ENSBTAG00000000599;ENSBTAG00000000642;ENSBTAG00000000878;ENSBTAG00000001069;ENSBTAG00000001528;ENSBTAG00000001671;ENSBTAG00000001856;ENSBTAG00000002072;ENSBTAG00000002363;ENSBTAG00000002625;ENSBTAG00000002683;ENSBTAG00000002917;ENSBTAG00000002970;ENSBTAG00000003460;ENSBTAG00000004021;ENSBTAG00000004695;ENSBTAG00000004781;ENSBTAG00000004820;…
Cellular Component	GO:0031300	intrinsic component of organelle membrane	98	270	1.10794e-06	1.28846e-05	ENSBTAG00000000428;ENSBTAG00000001475;ENSBTAG00000001592;ENSBTAG00000001744;ENSBTAG00000001781;ENSBTAG00000002296;ENSBTAG00000002768;ENSBTAG00000002939;ENSBTAG00000003038;ENSBTAG00000003052;ENSBTAG00000003109;ENSBTAG00000003307;ENSBTAG00000003693;ENSBTAG00000003798;ENSBTAG00000003876;ENSBTAG00000004300;ENSBTAG00000005227;ENSBTAG00000005314;ENSBTAG00000005807;ENSBTAG00000006084;ENSBTAG00000006177;…
Cellular Component	GO:0005769	early endosome	94	219	1.13566e-10	2.39376e-09	ENSBTAG00000000411;ENSBTAG00000000717;ENSBTAG00000001015;ENSBTAG00000001050;ENSBTAG00000001181;ENSBTAG00000001352;ENSBTAG00000001657;ENSBTAG00000001662;ENSBTAG00000001887;ENSBTAG00000001942;ENSBTAG00000002014;ENSBTAG00000002352;ENSBTAG00000002402;ENSBTAG00000002493;ENSBTAG00000002570;ENSBTAG00000002658;ENSBTAG00000002966;ENSBTAG00000003232;ENSBTAG00000004135;ENSBTAG00000005622;ENSBTAG00000006040;…
Cellular Component	GO:0031984	organelle subcompartment	93	234	1.6091e-08	2.81906e-07	ENSBTAG00000000025;ENSBTAG00000000342;ENSBTAG00000000446;ENSBTAG00000000985;ENSBTAG00000001269;ENSBTAG00000001977;ENSBTAG00000002010;ENSBTAG00000002352;ENSBTAG00000002402;ENSBTAG00000002881;ENSBTAG00000002939;ENSBTAG00000003052;ENSBTAG00000003232;ENSBTAG00000003330;ENSBTAG00000003566;ENSBTAG00000004870;ENSBTAG00000005058;ENSBTAG00000005161;ENSBTAG00000005614;ENSBTAG00000005809;ENSBTAG00000005844;…
Cellular Component	GO:0031301	integral component of organelle membrane	93	257	2.38699e-06	2.57604e-05	ENSBTAG00000000428;ENSBTAG00000001475;ENSBTAG00000001592;ENSBTAG00000001744;ENSBTAG00000001781;ENSBTAG00000002296;ENSBTAG00000002768;ENSBTAG00000002939;ENSBTAG00000003038;ENSBTAG00000003052;ENSBTAG00000003109;ENSBTAG00000003307;ENSBTAG00000003693;ENSBTAG00000003798;ENSBTAG00000003876;ENSBTAG00000004300;ENSBTAG00000005227;ENSBTAG00000005807;ENSBTAG00000006084;ENSBTAG00000006177;ENSBTAG00000006200;…
Cellular Component	GO:0005911	cell-cell junction	93	302	0.00184464	0.0109141	ENSBTAG00000000113;ENSBTAG00000000322;ENSBTAG00000000815;ENSBTAG00000000836;ENSBTAG00000001460;ENSBTAG00000001498;ENSBTAG00000001700;ENSBTAG00000001736;ENSBTAG00000001776;ENSBTAG00000002029;ENSBTAG00000002411;ENSBTAG00000002651;ENSBTAG00000002813;ENSBTAG00000002996;ENSBTAG00000003191;ENSBTAG00000003265;ENSBTAG00000003401;ENSBTAG00000003727;ENSBTAG00000004036;ENSBTAG00000004131;ENSBTAG00000004736;…
Cellular Component	GO:0005874	microtubule	90	281	0.000561639	0.00392565	ENSBTAG00000000113;ENSBTAG00000000458;ENSBTAG00000000711;ENSBTAG00000001349;ENSBTAG00000001489;ENSBTAG00000001575;ENSBTAG00000001631;ENSBTAG00000001717;ENSBTAG00000001774;ENSBTAG00000001848;ENSBTAG00000001961;ENSBTAG00000002121;ENSBTAG00000002148;ENSBTAG00000002280;ENSBTAG00000002633;ENSBTAG00000002646;ENSBTAG00000003215;ENSBTAG00000003298;ENSBTAG00000003314;ENSBTAG00000003908;ENSBTAG00000004114;…
Cellular Component	GO:0031965	nuclear membrane	88	184	3.27698e-13	8.34083e-12	ENSBTAG00000000152;ENSBTAG00000000878;ENSBTAG00000001105;ENSBTAG00000001168;ENSBTAG00000001435;ENSBTAG00000001463;ENSBTAG00000001470;ENSBTAG00000001552;ENSBTAG00000002458;ENSBTAG00000002501;ENSBTAG00000002835;ENSBTAG00000002988;ENSBTAG00000003044;ENSBTAG00000003381;ENSBTAG00000003693;ENSBTAG00000003788;ENSBTAG00000003990;ENSBTAG00000004240;ENSBTAG00000004422;ENSBTAG00000004715;ENSBTAG00000004814;…
Cellular Component	GO:0005938	cell cortex	83	207	5.88608e-08	9.56666e-07	ENSBTAG00000000137;ENSBTAG00000000347;ENSBTAG00000000369;ENSBTAG00000000764;ENSBTAG00000001182;ENSBTAG00000001400;ENSBTAG00000001673;ENSBTAG00000002082;ENSBTAG00000002313;ENSBTAG00000002608;ENSBTAG00000002633;ENSBTAG00000002996;ENSBTAG00000003265;ENSBTAG00000003397;ENSBTAG00000003566;ENSBTAG00000003908;ENSBTAG00000004072;ENSBTAG00000004383;ENSBTAG00000004413;ENSBTAG00000004553;ENSBTAG00000004554;…
Cellular Component	GO:0000775	chromosome, centromeric region	82	153	5.73876e-16	1.72035e-14	ENSBTAG00000000022;ENSBTAG00000000162;ENSBTAG00000000469;ENSBTAG00000000746;ENSBTAG00000000752;ENSBTAG00000001182;ENSBTAG00000001717;ENSBTAG00000002078;ENSBTAG00000002260;ENSBTAG00000002613;ENSBTAG00000002655;ENSBTAG00000002736;ENSBTAG00000003314;ENSBTAG00000004448;ENSBTAG00000004706;ENSBTAG00000004887;ENSBTAG00000004965;ENSBTAG00000005197;ENSBTAG00000005213;ENSBTAG00000005456;ENSBTAG00000005862;…
Cellular Component	GO:0000228	nuclear chromosome	81	200	5.05033e-08	8.41099e-07	ENSBTAG00000000023;ENSBTAG00000000039;ENSBTAG00000000252;ENSBTAG00000000526;ENSBTAG00000000590;ENSBTAG00000000629;ENSBTAG00000001161;ENSBTAG00000002613;ENSBTAG00000002718;ENSBTAG00000002918;ENSBTAG00000003265;ENSBTAG00000003323;ENSBTAG00000003354;ENSBTAG00000003693;ENSBTAG00000003843;ENSBTAG00000004509;ENSBTAG00000005197;ENSBTAG00000005578;ENSBTAG00000006065;ENSBTAG00000006225;ENSBTAG00000006404;…
Cellular Component	GO:0098791	Golgi subcompartment	81	215	1.73918e-06	1.90744e-05	ENSBTAG00000000025;ENSBTAG00000000342;ENSBTAG00000000446;ENSBTAG00000001269;ENSBTAG00000001977;ENSBTAG00000002010;ENSBTAG00000002352;ENSBTAG00000002402;ENSBTAG00000002881;ENSBTAG00000002939;ENSBTAG00000003052;ENSBTAG00000003232;ENSBTAG00000003566;ENSBTAG00000004870;ENSBTAG00000005058;ENSBTAG00000005161;ENSBTAG00000005614;ENSBTAG00000005809;ENSBTAG00000005844;ENSBTAG00000006014;ENSBTAG00000006323;…
Cellular Component	GO:0035770	ribonucleoprotein granule	80	193	1.8134e-08	3.13624e-07	ENSBTAG00000000241;ENSBTAG00000000288;ENSBTAG00000000613;ENSBTAG00000000630;ENSBTAG00000001171;ENSBTAG00000001468;ENSBTAG00000001489;ENSBTAG00000001700;ENSBTAG00000002520;ENSBTAG00000002879;ENSBTAG00000003588;ENSBTAG00000003719;ENSBTAG00000003748;ENSBTAG00000003807;ENSBTAG00000004266;ENSBTAG00000004376;ENSBTAG00000004564;ENSBTAG00000004695;ENSBTAG00000005166;ENSBTAG00000005462;ENSBTAG00000005634;…
Cellular Component	GO:0012506	vesicle membrane	79	242	0.000631802	0.00437078	ENSBTAG00000000260;ENSBTAG00000000764;ENSBTAG00000000807;ENSBTAG00000001105;ENSBTAG00000001332;ENSBTAG00000001657;ENSBTAG00000001673;ENSBTAG00000001829;ENSBTAG00000002769;ENSBTAG00000002791;ENSBTAG00000003109;ENSBTAG00000003619;ENSBTAG00000003708;ENSBTAG00000004333;ENSBTAG00000004463;ENSBTAG00000004736;ENSBTAG00000005016;ENSBTAG00000005058;ENSBTAG00000005384;ENSBTAG00000005397;ENSBTAG00000005458;…
Cellular Component	GO:0044433	cytoplasmic vesicle part	77	244	0.00211598	0.0121985	ENSBTAG00000000260;ENSBTAG00000000807;ENSBTAG00000001332;ENSBTAG00000001657;ENSBTAG00000001673;ENSBTAG00000001829;ENSBTAG00000002643;ENSBTAG00000002769;ENSBTAG00000002791;ENSBTAG00000003109;ENSBTAG00000003619;ENSBTAG00000003708;ENSBTAG00000004333;ENSBTAG00000004463;ENSBTAG00000005016;ENSBTAG00000005058;ENSBTAG00000005384;ENSBTAG00000005397;ENSBTAG00000005458;ENSBTAG00000005694;ENSBTAG00000005809;…
Cellular Component	GO:0045177	apical part of cell	77	262	0.0146099	0.0631695	ENSBTAG00000000497;ENSBTAG00000000898;ENSBTAG00000001013;ENSBTAG00000001244;ENSBTAG00000001246;ENSBTAG00000001403;ENSBTAG00000001545;ENSBTAG00000001700;ENSBTAG00000001788;ENSBTAG00000001822;ENSBTAG00000002703;ENSBTAG00000002996;ENSBTAG00000003075;ENSBTAG00000003418;ENSBTAG00000004672;ENSBTAG00000005668;ENSBTAG00000006189;ENSBTAG00000006578;ENSBTAG00000006731;ENSBTAG00000007330;ENSBTAG00000007415;…
Cellular Component	GO:0036464	cytoplasmic ribonucleoprotein granule	75	182	6.6786e-08	1.03557e-06	ENSBTAG00000000241;ENSBTAG00000000288;ENSBTAG00000000613;ENSBTAG00000000630;ENSBTAG00000001171;ENSBTAG00000001468;ENSBTAG00000001489;ENSBTAG00000001700;ENSBTAG00000002520;ENSBTAG00000002879;ENSBTAG00000003588;ENSBTAG00000003748;ENSBTAG00000003807;ENSBTAG00000004266;ENSBTAG00000004376;ENSBTAG00000004564;ENSBTAG00000004695;ENSBTAG00000005166;ENSBTAG00000005462;ENSBTAG00000005634;ENSBTAG00000005913;…
Cellular Component	GO:0005681	spliceosomal complex	74	179	6.96848e-08	1.06824e-06	ENSBTAG00000001035;ENSBTAG00000001553;ENSBTAG00000002086;ENSBTAG00000002720;ENSBTAG00000002830;ENSBTAG00000003094;ENSBTAG00000003407;ENSBTAG00000004571;ENSBTAG00000005441;ENSBTAG00000005634;ENSBTAG00000005726;ENSBTAG00000005795;ENSBTAG00000006104;ENSBTAG00000006114;ENSBTAG00000006250;ENSBTAG00000006330;ENSBTAG00000006353;ENSBTAG00000006423;ENSBTAG00000006960;ENSBTAG00000007234;ENSBTAG00000007299;…
Cellular Component	GO:0045121	membrane raft	74	199	8.21595e-06	8.20987e-05	ENSBTAG00000000231;ENSBTAG00000000469;ENSBTAG00000000717;ENSBTAG00000000736;ENSBTAG00000000894;ENSBTAG00000001027;ENSBTAG00000001332;ENSBTAG00000002010;ENSBTAG00000002939;ENSBTAG00000003001;ENSBTAG00000004211;ENSBTAG00000004457;ENSBTAG00000006420;ENSBTAG00000006642;ENSBTAG00000007923;ENSBTAG00000007993;ENSBTAG00000008607;ENSBTAG00000008766;ENSBTAG00000008938;ENSBTAG00000009368;ENSBTAG00000009617;…
Cellular Component	GO:0098857	membrane microdomain	74	199	8.21595e-06	8.20987e-05	ENSBTAG00000000231;ENSBTAG00000000469;ENSBTAG00000000717;ENSBTAG00000000736;ENSBTAG00000000894;ENSBTAG00000001027;ENSBTAG00000001332;ENSBTAG00000002010;ENSBTAG00000002939;ENSBTAG00000003001;ENSBTAG00000004211;ENSBTAG00000004457;ENSBTAG00000006420;ENSBTAG00000006642;ENSBTAG00000007923;ENSBTAG00000007993;ENSBTAG00000008607;ENSBTAG00000008766;ENSBTAG00000008938;ENSBTAG00000009368;ENSBTAG00000009617;…
Cellular Component	GO:0030659	cytoplasmic vesicle membrane	72	224	0.00170067	0.010381	ENSBTAG00000000260;ENSBTAG00000000807;ENSBTAG00000001332;ENSBTAG00000001657;ENSBTAG00000001673;ENSBTAG00000001829;ENSBTAG00000002769;ENSBTAG00000002791;ENSBTAG00000003109;ENSBTAG00000003619;ENSBTAG00000003708;ENSBTAG00000004333;ENSBTAG00000004463;ENSBTAG00000005016;ENSBTAG00000005058;ENSBTAG00000005384;ENSBTAG00000005397;ENSBTAG00000005458;ENSBTAG00000005694;ENSBTAG00000005809;ENSBTAG00000006323;…
Cellular Component	GO:0030133	transport vesicle	72	231	0.00406286	0.021578	ENSBTAG00000000025;ENSBTAG00000000393;ENSBTAG00000000460;ENSBTAG00000000764;ENSBTAG00000000807;ENSBTAG00000000985;ENSBTAG00000001394;ENSBTAG00000001657;ENSBTAG00000001977;ENSBTAG00000002148;ENSBTAG00000002402;ENSBTAG00000002769;ENSBTAG00000002784;ENSBTAG00000002791;ENSBTAG00000002939;ENSBTAG00000003619;ENSBTAG00000003708;ENSBTAG00000004334;ENSBTAG00000005058;ENSBTAG00000005724;ENSBTAG00000006526;…
Cellular Component	GO:0030027	lamellipodium	69	126	2.80143e-14	7.58915e-13	ENSBTAG00000000210;ENSBTAG00000000700;ENSBTAG00000000815;ENSBTAG00000000897;ENSBTAG00000001081;ENSBTAG00000001788;ENSBTAG00000002014;ENSBTAG00000002727;ENSBTAG00000003191;ENSBTAG00000003401;ENSBTAG00000004554;ENSBTAG00000004643;ENSBTAG00000004896;ENSBTAG00000005136;ENSBTAG00000005190;ENSBTAG00000005345;ENSBTAG00000005432;ENSBTAG00000005958;ENSBTAG00000006045;ENSBTAG00000006071;ENSBTAG00000006099;…
Cellular Component	GO:0044452	nucleolar part	69	168	2.56277e-07	3.45717e-06	ENSBTAG00000000039;ENSBTAG00000000260;ENSBTAG00000000322;ENSBTAG00000000833;ENSBTAG00000000957;ENSBTAG00000001468;ENSBTAG00000002078;ENSBTAG00000002277;ENSBTAG00000003098;ENSBTAG00000003225;ENSBTAG00000003323;ENSBTAG00000003636;ENSBTAG00000003934;ENSBTAG00000004000;ENSBTAG00000004820;ENSBTAG00000004976;ENSBTAG00000005067;ENSBTAG00000005627;ENSBTAG00000005980;ENSBTAG00000005987;ENSBTAG00000006068;…
Cellular Component	GO:0019898	extrinsic component of membrane	69	213	0.00167578	0.0102756	ENSBTAG00000000215;ENSBTAG00000000878;ENSBTAG00000001030;ENSBTAG00000001523;ENSBTAG00000001822;ENSBTAG00000002411;ENSBTAG00000002767;ENSBTAG00000002941;ENSBTAG00000003300;ENSBTAG00000003695;ENSBTAG00000003708;ENSBTAG00000005958;ENSBTAG00000006323;ENSBTAG00000006609;ENSBTAG00000007058;ENSBTAG00000007703;ENSBTAG00000008122;ENSBTAG00000008717;ENSBTAG00000008938;ENSBTAG00000008987;ENSBTAG00000009087;…
Cellular Component	GO:0030135	coated vesicle	66	143	1.86627e-09	3.59656e-08	ENSBTAG00000000807;ENSBTAG00000001657;ENSBTAG00000001977;ENSBTAG00000002352;ENSBTAG00000002402;ENSBTAG00000002769;ENSBTAG00000002791;ENSBTAG00000002939;ENSBTAG00000002977;ENSBTAG00000003075;ENSBTAG00000003619;ENSBTAG00000003708;ENSBTAG00000004333;ENSBTAG00000004463;ENSBTAG00000005016;ENSBTAG00000005384;ENSBTAG00000006071;ENSBTAG00000006323;ENSBTAG00000006556;ENSBTAG00000006690;ENSBTAG00000007712;…
Cellular Component	GO:0005759	mitochondrial matrix	66	221	0.015785	0.0671732	ENSBTAG00000000417;ENSBTAG00000001044;ENSBTAG00000001069;ENSBTAG00000001174;ENSBTAG00000001199;ENSBTAG00000001289;ENSBTAG00000001419;ENSBTAG00000001832;ENSBTAG00000002685;ENSBTAG00000003294;ENSBTAG00000003303;ENSBTAG00000003546;ENSBTAG00000005075;ENSBTAG00000005469;ENSBTAG00000005620;ENSBTAG00000006463;ENSBTAG00000006526;ENSBTAG00000006767;ENSBTAG00000006876;ENSBTAG00000006928;ENSBTAG00000006936;…
Cellular Component	GO:0030496	midbody	64	137	1.78238e-09	3.48469e-08	ENSBTAG00000001182;ENSBTAG00000001352;ENSBTAG00000001700;ENSBTAG00000001717;ENSBTAG00000001776;ENSBTAG00000002393;ENSBTAG00000002411;ENSBTAG00000003298;ENSBTAG00000003362;ENSBTAG00000003804;ENSBTAG00000004416;ENSBTAG00000004544;ENSBTAG00000004792;ENSBTAG00000004844;ENSBTAG00000005129;ENSBTAG00000005432;ENSBTAG00000006574;ENSBTAG00000007662;ENSBTAG00000008040;ENSBTAG00000008147;ENSBTAG00000008579;…
Cellular Component	GO:0005770	late endosome	64	173	3.90014e-05	0.000350752	ENSBTAG00000001632;ENSBTAG00000001659;ENSBTAG00000002402;ENSBTAG00000002747;ENSBTAG00000003001;ENSBTAG00000003745;ENSBTAG00000004307;ENSBTAG00000005622;ENSBTAG00000005711;ENSBTAG00000006574;ENSBTAG00000007399;ENSBTAG00000007923;ENSBTAG00000007939;ENSBTAG00000008729;ENSBTAG00000008938;ENSBTAG00000009368;ENSBTAG00000010018;ENSBTAG00000010193;ENSBTAG00000010242;ENSBTAG00000010355;ENSBTAG00000010492;…
Cellular Component	GO:0044454	nuclear chromosome part	63	157	2.14819e-06	2.33702e-05	ENSBTAG00000000023;ENSBTAG00000000039;ENSBTAG00000000252;ENSBTAG00000000590;ENSBTAG00000000629;ENSBTAG00000001161;ENSBTAG00000002613;ENSBTAG00000002718;ENSBTAG00000002918;ENSBTAG00000003843;ENSBTAG00000004509;ENSBTAG00000005197;ENSBTAG00000005578;ENSBTAG00000006065;ENSBTAG00000006225;ENSBTAG00000006404;ENSBTAG00000007234;ENSBTAG00000007237;ENSBTAG00000007323;ENSBTAG00000007617;ENSBTAG00000007749;…
Cellular Component	GO:0044437	vacuolar part	63	188	0.00102091	0.00658586	ENSBTAG00000000203;ENSBTAG00000000830;ENSBTAG00000000878;ENSBTAG00000001269;ENSBTAG00000002296;ENSBTAG00000002854;ENSBTAG00000003001;ENSBTAG00000003450;ENSBTAG00000003928;ENSBTAG00000003935;ENSBTAG00000005158;ENSBTAG00000005622;ENSBTAG00000005668;ENSBTAG00000006550;ENSBTAG00000006574;ENSBTAG00000006768;ENSBTAG00000007272;ENSBTAG00000007399;ENSBTAG00000007898;ENSBTAG00000008016;ENSBTAG00000008310;…
Cellular Component	GO:0005774	vacuolar membrane	62	180	0.000502449	0.00356739	ENSBTAG00000000203;ENSBTAG00000000830;ENSBTAG00000000878;ENSBTAG00000001269;ENSBTAG00000002296;ENSBTAG00000002854;ENSBTAG00000003001;ENSBTAG00000003450;ENSBTAG00000003928;ENSBTAG00000003935;ENSBTAG00000005158;ENSBTAG00000005622;ENSBTAG00000005668;ENSBTAG00000006550;ENSBTAG00000006574;ENSBTAG00000006768;ENSBTAG00000007272;ENSBTAG00000007399;ENSBTAG00000007898;ENSBTAG00000008016;ENSBTAG00000008310;…
Cellular Component	GO:0044450	microtubule organizing center part	60	207	0.0367585	0.135115	ENSBTAG00000000322;ENSBTAG00000000687;ENSBTAG00000001602;ENSBTAG00000001673;ENSBTAG00000001736;ENSBTAG00000001848;ENSBTAG00000002039;ENSBTAG00000002280;ENSBTAG00000002331;ENSBTAG00000002854;ENSBTAG00000003073;ENSBTAG00000003960;ENSBTAG00000004448;ENSBTAG00000004887;ENSBTAG00000005129;ENSBTAG00000005432;ENSBTAG00000005792;ENSBTAG00000005905;ENSBTAG00000006162;ENSBTAG00000006395;ENSBTAG00000006463;…
Cellular Component	GO:0000776	kinetochore	59	109	3.94847e-12	9.02794e-11	ENSBTAG00000000022;ENSBTAG00000000162;ENSBTAG00000000746;ENSBTAG00000000752;ENSBTAG00000001182;ENSBTAG00000001717;ENSBTAG00000002613;ENSBTAG00000002655;ENSBTAG00000003314;ENSBTAG00000004448;ENSBTAG00000004887;ENSBTAG00000004965;ENSBTAG00000005213;ENSBTAG00000005456;ENSBTAG00000006185;ENSBTAG00000006246;ENSBTAG00000006404;ENSBTAG00000007237;ENSBTAG00000008180;ENSBTAG00000008883;ENSBTAG00000009432;…
Cellular Component	GO:0000793	condensed chromosome	59	140	6.63972e-07	8.29351e-06	ENSBTAG00000000526;ENSBTAG00000000752;ENSBTAG00000001182;ENSBTAG00000001717;ENSBTAG00000002260;ENSBTAG00000002613;ENSBTAG00000002918;ENSBTAG00000003265;ENSBTAG00000003314;ENSBTAG00000003323;ENSBTAG00000003693;ENSBTAG00000004021;ENSBTAG00000004448;ENSBTAG00000004965;ENSBTAG00000005197;ENSBTAG00000005213;ENSBTAG00000005862;ENSBTAG00000006185;ENSBTAG00000006404;ENSBTAG00000007237;ENSBTAG00000007303;…
Cellular Component	GO:0030055	cell-substrate junction	59	141	8.83233e-07	1.04516e-05	ENSBTAG00000000357;ENSBTAG00000000415;ENSBTAG00000000700;ENSBTAG00000000815;ENSBTAG00000001081;ENSBTAG00000002350;ENSBTAG00000002374;ENSBTAG00000002391;ENSBTAG00000002485;ENSBTAG00000002941;ENSBTAG00000002996;ENSBTAG00000003245;ENSBTAG00000003418;ENSBTAG00000003727;ENSBTAG00000003908;ENSBTAG00000004672;ENSBTAG00000005843;ENSBTAG00000005958;ENSBTAG00000007079;ENSBTAG00000007520;ENSBTAG00000008938;…
Cellular Component	GO:0005925	focal adhesion	58	136	5.11403e-07	6.63348e-06	ENSBTAG00000000357;ENSBTAG00000000700;ENSBTAG00000000815;ENSBTAG00000001081;ENSBTAG00000002350;ENSBTAG00000002374;ENSBTAG00000002391;ENSBTAG00000002485;ENSBTAG00000002941;ENSBTAG00000002996;ENSBTAG00000003245;ENSBTAG00000003418;ENSBTAG00000003727;ENSBTAG00000003908;ENSBTAG00000004672;ENSBTAG00000005843;ENSBTAG00000005958;ENSBTAG00000007079;ENSBTAG00000007520;ENSBTAG00000008938;ENSBTAG00000009228;…
Cellular Component	GO:0005924	cell-substrate adherens junction	58	138	9.15644e-07	1.07409e-05	ENSBTAG00000000357;ENSBTAG00000000700;ENSBTAG00000000815;ENSBTAG00000001081;ENSBTAG00000002350;ENSBTAG00000002374;ENSBTAG00000002391;ENSBTAG00000002485;ENSBTAG00000002941;ENSBTAG00000002996;ENSBTAG00000003245;ENSBTAG00000003418;ENSBTAG00000003727;ENSBTAG00000003908;ENSBTAG00000004672;ENSBTAG00000005843;ENSBTAG00000005958;ENSBTAG00000007079;ENSBTAG00000007520;ENSBTAG00000008938;ENSBTAG00000009228;…
Cellular Component	GO:0044798	nuclear transcription factor complex	58	157	9.17207e-05	0.000778184	ENSBTAG00000000305;ENSBTAG00000000340;ENSBTAG00000000602;ENSBTAG00000001069;ENSBTAG00000002072;ENSBTAG00000002422;ENSBTAG00000002586;ENSBTAG00000003460;ENSBTAG00000003971;ENSBTAG00000004037;ENSBTAG00000004322;ENSBTAG00000005138;ENSBTAG00000005160;ENSBTAG00000005474;ENSBTAG00000005780;ENSBTAG00000006126;ENSBTAG00000006640;ENSBTAG00000006844;ENSBTAG00000006919;ENSBTAG00000007961;ENSBTAG00000008543;…
Cellular Component	GO:0005802	trans-Golgi network	58	162	0.000243012	0.00186263	ENSBTAG00000000025;ENSBTAG00000000342;ENSBTAG00000000446;ENSBTAG00000001269;ENSBTAG00000001977;ENSBTAG00000002010;ENSBTAG00000002352;ENSBTAG00000002402;ENSBTAG00000002881;ENSBTAG00000002939;ENSBTAG00000003052;ENSBTAG00000003232;ENSBTAG00000003566;ENSBTAG00000005058;ENSBTAG00000005161;ENSBTAG00000005844;ENSBTAG00000006014;ENSBTAG00000006323;ENSBTAG00000006492;ENSBTAG00000007497;ENSBTAG00000007962;…
Cellular Component	GO:0030139	endocytic vesicle	57	127	7.81863e-08	1.15905e-06	ENSBTAG00000001332;ENSBTAG00000001483;ENSBTAG00000001657;ENSBTAG00000001662;ENSBTAG00000001700;ENSBTAG00000001887;ENSBTAG00000002280;ENSBTAG00000002381;ENSBTAG00000002402;ENSBTAG00000003525;ENSBTAG00000003727;ENSBTAG00000004282;ENSBTAG00000005362;ENSBTAG00000006162;ENSBTAG00000006189;ENSBTAG00000006792;ENSBTAG00000007330;ENSBTAG00000008232;ENSBTAG00000009784;ENSBTAG00000009915;ENSBTAG00000010073;…
Cellular Component	GO:0031461	cullin-RING ubiquitin ligase complex	57	153	8.03744e-05	0.000699517	ENSBTAG00000000162;ENSBTAG00000000501;ENSBTAG00000000856;ENSBTAG00000001107;ENSBTAG00000001937;ENSBTAG00000002236;ENSBTAG00000002697;ENSBTAG00000002726;ENSBTAG00000002796;ENSBTAG00000003219;ENSBTAG00000003500;ENSBTAG00000004147;ENSBTAG00000005488;ENSBTAG00000005796;ENSBTAG00000005824;ENSBTAG00000006708;ENSBTAG00000007133;ENSBTAG00000007476;ENSBTAG00000008115;ENSBTAG00000008350;ENSBTAG00000008736;…
Cellular Component	GO:0072686	mitotic spindle	56	131	7.27798e-07	8.84505e-06	ENSBTAG00000000630;ENSBTAG00000000660;ENSBTAG00000001463;ENSBTAG00000001700;ENSBTAG00000001717;ENSBTAG00000002726;ENSBTAG00000003314;ENSBTAG00000004416;ENSBTAG00000005432;ENSBTAG00000005620;ENSBTAG00000005663;ENSBTAG00000005792;ENSBTAG00000006071;ENSBTAG00000006268;ENSBTAG00000006532;ENSBTAG00000006667;ENSBTAG00000007545;ENSBTAG00000007566;ENSBTAG00000007961;ENSBTAG00000008088;ENSBTAG00000008579;…
Cellular Component	GO:0044448	cell cortex part	56	138	5.15652e-06	5.31004e-05	ENSBTAG00000001182;ENSBTAG00000002608;ENSBTAG00000002633;ENSBTAG00000002996;ENSBTAG00000003397;ENSBTAG00000003908;ENSBTAG00000004072;ENSBTAG00000004553;ENSBTAG00000004554;ENSBTAG00000004635;ENSBTAG00000004643;ENSBTAG00000006071;ENSBTAG00000006323;ENSBTAG00000006667;ENSBTAG00000006995;ENSBTAG00000007910;ENSBTAG00000008480;ENSBTAG00000008606;ENSBTAG00000009617;ENSBTAG00000010073;ENSBTAG00000010402;…
Cellular Component	GO:0031253	cell projection membrane	55	181	0.0183654	0.0749371	ENSBTAG00000000113;ENSBTAG00000000369;ENSBTAG00000001400;ENSBTAG00000001662;ENSBTAG00000001673;ENSBTAG00000003191;ENSBTAG00000003908;ENSBTAG00000004636;ENSBTAG00000004651;ENSBTAG00000005620;ENSBTAG00000006099;ENSBTAG00000006396;ENSBTAG00000006731;ENSBTAG00000006995;ENSBTAG00000007415;ENSBTAG00000007614;ENSBTAG00000007808;ENSBTAG00000007898;ENSBTAG00000008938;ENSBTAG00000009665;ENSBTAG00000010740;…
Cellular Component	GO:0098858	actin-based cell projection	54	134	9.59474e-06	9.51713e-05	ENSBTAG00000000369;ENSBTAG00000000897;ENSBTAG00000001332;ENSBTAG00000001700;ENSBTAG00000001788;ENSBTAG00000002703;ENSBTAG00000003191;ENSBTAG00000003418;ENSBTAG00000004672;ENSBTAG00000005136;ENSBTAG00000005462;ENSBTAG00000006578;ENSBTAG00000006731;ENSBTAG00000007079;ENSBTAG00000007173;ENSBTAG00000007415;ENSBTAG00000007578;ENSBTAG00000007808;ENSBTAG00000009470;ENSBTAG00000009665;ENSBTAG00000010347;…
Cellular Component	GO:0055037	recycling endosome	53	114	5.27286e-08	8.6745e-07	ENSBTAG00000000446;ENSBTAG00000000616;ENSBTAG00000000711;ENSBTAG00000000985;ENSBTAG00000001050;ENSBTAG00000001352;ENSBTAG00000001489;ENSBTAG00000001662;ENSBTAG00000002643;ENSBTAG00000002769;ENSBTAG00000003232;ENSBTAG00000004131;ENSBTAG00000004135;ENSBTAG00000005493;ENSBTAG00000005844;ENSBTAG00000006162;ENSBTAG00000006792;ENSBTAG00000007120;ENSBTAG00000007962;ENSBTAG00000009693;ENSBTAG00000010356;…
Cellular Component	GO:0001650	fibrillar center	53	122	7.80371e-07	9.39929e-06	ENSBTAG00000000260;ENSBTAG00000000322;ENSBTAG00000000833;ENSBTAG00000001468;ENSBTAG00000002078;ENSBTAG00000002277;ENSBTAG00000003098;ENSBTAG00000003225;ENSBTAG00000003636;ENSBTAG00000003934;ENSBTAG00000004000;ENSBTAG00000004820;ENSBTAG00000004976;ENSBTAG00000005067;ENSBTAG00000005627;ENSBTAG00000005980;ENSBTAG00000005987;ENSBTAG00000006068;ENSBTAG00000006843;ENSBTAG00000007234;ENSBTAG00000007435;…
Cellular Component	GO:0030880	RNA polymerase complex	52	130	1.77837e-05	0.000171359	ENSBTAG00000000579;ENSBTAG00000000642;ENSBTAG00000001069;ENSBTAG00000001671;ENSBTAG00000001856;ENSBTAG00000002072;ENSBTAG00000002970;ENSBTAG00000003460;ENSBTAG00000004781;ENSBTAG00000004820;ENSBTAG00000005086;ENSBTAG00000005160;ENSBTAG00000006235;ENSBTAG00000006481;ENSBTAG00000007620;ENSBTAG00000007937;ENSBTAG00000007961;ENSBTAG00000008170;ENSBTAG00000008543;ENSBTAG00000010036;ENSBTAG00000010455;…
Cellular Component	GO:0090575	RNA polymerase II transcription factor complex	52	141	0.000216366	0.00169696	ENSBTAG00000000305;ENSBTAG00000000340;ENSBTAG00000000602;ENSBTAG00000001069;ENSBTAG00000002072;ENSBTAG00000002422;ENSBTAG00000002586;ENSBTAG00000003460;ENSBTAG00000003971;ENSBTAG00000004037;ENSBTAG00000004322;ENSBTAG00000005138;ENSBTAG00000005160;ENSBTAG00000005474;ENSBTAG00000005780;ENSBTAG00000006640;ENSBTAG00000006844;ENSBTAG00000006919;ENSBTAG00000007961;ENSBTAG00000008543;ENSBTAG00000008695;…
Cellular Component	GO:0000428	DNA-directed RNA polymerase complex	51	128	2.41735e-05	0.000226459	ENSBTAG00000000579;ENSBTAG00000000642;ENSBTAG00000001069;ENSBTAG00000001671;ENSBTAG00000001856;ENSBTAG00000002072;ENSBTAG00000002970;ENSBTAG00000003460;ENSBTAG00000004781;ENSBTAG00000004820;ENSBTAG00000005086;ENSBTAG00000005160;ENSBTAG00000006235;ENSBTAG00000006481;ENSBTAG00000007620;ENSBTAG00000007937;ENSBTAG00000007961;ENSBTAG00000008170;ENSBTAG00000008543;ENSBTAG00000010036;ENSBTAG00000010455;…
Cellular Component	GO:0098562	cytoplasmic side of membrane	51	138	0.000233315	0.00180886	ENSBTAG00000000215;ENSBTAG00000001050;ENSBTAG00000001523;ENSBTAG00000002275;ENSBTAG00000002767;ENSBTAG00000002941;ENSBTAG00000002996;ENSBTAG00000004199;ENSBTAG00000004792;ENSBTAG00000005622;ENSBTAG00000005958;ENSBTAG00000006323;ENSBTAG00000006609;ENSBTAG00000006616;ENSBTAG00000008122;ENSBTAG00000008840;ENSBTAG00000008938;ENSBTAG00000009087;ENSBTAG00000009543;ENSBTAG00000009578;ENSBTAG00000009778;…
Cellular Component	GO:0055029	nuclear DNA-directed RNA polymerase complex	50	127	4.19466e-05	0.000374741	ENSBTAG00000000579;ENSBTAG00000000642;ENSBTAG00000001069;ENSBTAG00000001671;ENSBTAG00000001856;ENSBTAG00000002072;ENSBTAG00000002970;ENSBTAG00000003460;ENSBTAG00000004781;ENSBTAG00000004820;ENSBTAG00000005086;ENSBTAG00000005160;ENSBTAG00000006235;ENSBTAG00000006481;ENSBTAG00000007620;ENSBTAG00000007937;ENSBTAG00000007961;ENSBTAG00000008170;ENSBTAG00000008543;ENSBTAG00000010036;ENSBTAG00000010455;…
Cellular Component	GO:0000922	spindle pole	49	110	8.201e-07	9.7904e-06	ENSBTAG00000000660;ENSBTAG00000000687;ENSBTAG00000000752;ENSBTAG00000001463;ENSBTAG00000001575;ENSBTAG00000001717;ENSBTAG00000001848;ENSBTAG00000002331;ENSBTAG00000004051;ENSBTAG00000004448;ENSBTAG00000004887;ENSBTAG00000005792;ENSBTAG00000005905;ENSBTAG00000006268;ENSBTAG00000006287;ENSBTAG00000006395;ENSBTAG00000006532;ENSBTAG00000008180;ENSBTAG00000008350;ENSBTAG00000008436;ENSBTAG00000009121;…
Cellular Component	GO:0001726	ruffle	47	105	1.15152e-06	1.32769e-05	ENSBTAG00000000113;ENSBTAG00000000322;ENSBTAG00000000369;ENSBTAG00000001400;ENSBTAG00000001673;ENSBTAG00000003191;ENSBTAG00000003566;ENSBTAG00000004636;ENSBTAG00000004651;ENSBTAG00000005432;ENSBTAG00000005620;ENSBTAG00000006071;ENSBTAG00000006099;ENSBTAG00000007079;ENSBTAG00000007395;ENSBTAG00000008938;ENSBTAG00000009565;ENSBTAG00000010191;ENSBTAG00000010347;ENSBTAG00000010402;ENSBTAG00000011479;…
Cellular Component	GO:0019867	outer membrane	47	136	0.00208427	0.0120673	ENSBTAG00000000428;ENSBTAG00000000562;ENSBTAG00000001165;ENSBTAG00000001781;ENSBTAG00000002295;ENSBTAG00000002296;ENSBTAG00000002412;ENSBTAG00000003990;ENSBTAG00000005314;ENSBTAG00000006084;ENSBTAG00000006526;ENSBTAG00000006693;ENSBTAG00000007668;ENSBTAG00000007900;ENSBTAG00000008040;ENSBTAG00000009213;ENSBTAG00000009784;ENSBTAG00000010001;ENSBTAG00000010083;ENSBTAG00000011198;ENSBTAG00000011757;…
Cellular Component	GO:0031968	organelle outer membrane	47	136	0.00208427	0.0120673	ENSBTAG00000000428;ENSBTAG00000000562;ENSBTAG00000001165;ENSBTAG00000001781;ENSBTAG00000002295;ENSBTAG00000002296;ENSBTAG00000002412;ENSBTAG00000003990;ENSBTAG00000005314;ENSBTAG00000006084;ENSBTAG00000006526;ENSBTAG00000006693;ENSBTAG00000007668;ENSBTAG00000007900;ENSBTAG00000008040;ENSBTAG00000009213;ENSBTAG00000009784;ENSBTAG00000010001;ENSBTAG00000010083;ENSBTAG00000011198;ENSBTAG00000011757;…
Cellular Component	GO:0031248	protein acetyltransferase complex	46	96	1.28797e-07	1.82892e-06	ENSBTAG00000000252;ENSBTAG00000000746;ENSBTAG00000000902;ENSBTAG00000001016;ENSBTAG00000001144;ENSBTAG00000001311;ENSBTAG00000001552;ENSBTAG00000002295;ENSBTAG00000002625;ENSBTAG00000002693;ENSBTAG00000002920;ENSBTAG00000004271;ENSBTAG00000004497;ENSBTAG00000004745;ENSBTAG00000005124;ENSBTAG00000005578;ENSBTAG00000007113;ENSBTAG00000007776;ENSBTAG00000007784;ENSBTAG00000007961;ENSBTAG00000008737;…
Cellular Component	GO:1902493	acetyltransferase complex	46	96	1.28797e-07	1.82892e-06	ENSBTAG00000000252;ENSBTAG00000000746;ENSBTAG00000000902;ENSBTAG00000001016;ENSBTAG00000001144;ENSBTAG00000001311;ENSBTAG00000001552;ENSBTAG00000002295;ENSBTAG00000002625;ENSBTAG00000002693;ENSBTAG00000002920;ENSBTAG00000004271;ENSBTAG00000004497;ENSBTAG00000004745;ENSBTAG00000005124;ENSBTAG00000005578;ENSBTAG00000007113;ENSBTAG00000007776;ENSBTAG00000007784;ENSBTAG00000007961;ENSBTAG00000008737;…
Cellular Component	GO:0016323	basolateral plasma membrane	46	145	0.0134908	0.0592803	ENSBTAG00000000415;ENSBTAG00000000668;ENSBTAG00000001050;ENSBTAG00000001246;ENSBTAG00000001332;ENSBTAG00000001788;ENSBTAG00000003418;ENSBTAG00000004457;ENSBTAG00000005379;ENSBTAG00000005668;ENSBTAG00000006161;ENSBTAG00000006578;ENSBTAG00000007415;ENSBTAG00000007988;ENSBTAG00000009617;ENSBTAG00000010018;ENSBTAG00000010073;ENSBTAG00000010620;ENSBTAG00000011088;ENSBTAG00000011226;ENSBTAG00000011291;…
Cellular Component	GO:0031227	intrinsic component of endoplasmic reticulum membrane	45	117	0.000187473	0.0014858	ENSBTAG00000001592;ENSBTAG00000002296;ENSBTAG00000003038;ENSBTAG00000003798;ENSBTAG00000004300;ENSBTAG00000005227;ENSBTAG00000007080;ENSBTAG00000007385;ENSBTAG00000007562;ENSBTAG00000007662;ENSBTAG00000008076;ENSBTAG00000008840;ENSBTAG00000009112;ENSBTAG00000009543;ENSBTAG00000010006;ENSBTAG00000010009;ENSBTAG00000010564;ENSBTAG00000011104;ENSBTAG00000011748;ENSBTAG00000011831;ENSBTAG00000011834;…
Cellular Component	GO:0009898	cytoplasmic side of plasma membrane	45	120	0.000364137	0.00265525	ENSBTAG00000000215;ENSBTAG00000001050;ENSBTAG00000001523;ENSBTAG00000002275;ENSBTAG00000002767;ENSBTAG00000002941;ENSBTAG00000002996;ENSBTAG00000004199;ENSBTAG00000004792;ENSBTAG00000005622;ENSBTAG00000005958;ENSBTAG00000006323;ENSBTAG00000006609;ENSBTAG00000008122;ENSBTAG00000008938;ENSBTAG00000009087;ENSBTAG00000009543;ENSBTAG00000009578;ENSBTAG00000009778;ENSBTAG00000010347;ENSBTAG00000010402;…
Cellular Component	GO:0030176	integral component of endoplasmic reticulum membrane	43	110	0.000168952	0.00136476	ENSBTAG00000001592;ENSBTAG00000002296;ENSBTAG00000003038;ENSBTAG00000003798;ENSBTAG00000004300;ENSBTAG00000005227;ENSBTAG00000007080;ENSBTAG00000007385;ENSBTAG00000007562;ENSBTAG00000007662;ENSBTAG00000008076;ENSBTAG00000008840;ENSBTAG00000009112;ENSBTAG00000010006;ENSBTAG00000010009;ENSBTAG00000010564;ENSBTAG00000011104;ENSBTAG00000011748;ENSBTAG00000011831;ENSBTAG00000011834;ENSBTAG00000012904;…
Cellular Component	GO:0005765	lysosomal membrane	42	131	0.0146568	0.0631695	ENSBTAG00000000203;ENSBTAG00000000830;ENSBTAG00000001269;ENSBTAG00000002854;ENSBTAG00000003001;ENSBTAG00000003935;ENSBTAG00000005622;ENSBTAG00000005668;ENSBTAG00000006574;ENSBTAG00000007399;ENSBTAG00000007898;ENSBTAG00000008310;ENSBTAG00000010193;ENSBTAG00000010242;ENSBTAG00000010545;ENSBTAG00000010792;ENSBTAG00000010956;ENSBTAG00000011147;ENSBTAG00000011491;ENSBTAG00000011831;ENSBTAG00000011931;…
Cellular Component	GO:0098852	lytic vacuole membrane	42	131	0.0146568	0.0631695	ENSBTAG00000000203;ENSBTAG00000000830;ENSBTAG00000001269;ENSBTAG00000002854;ENSBTAG00000003001;ENSBTAG00000003935;ENSBTAG00000005622;ENSBTAG00000005668;ENSBTAG00000006574;ENSBTAG00000007399;ENSBTAG00000007898;ENSBTAG00000008310;ENSBTAG00000010193;ENSBTAG00000010242;ENSBTAG00000010545;ENSBTAG00000010792;ENSBTAG00000010956;ENSBTAG00000011147;ENSBTAG00000011491;ENSBTAG00000011831;ENSBTAG00000011931;…
Cellular Component	GO:0030117	membrane coat	41	82	1.41001e-07	1.96093e-06	ENSBTAG00000000807;ENSBTAG00000001189;ENSBTAG00000001407;ENSBTAG00000001657;ENSBTAG00000002769;ENSBTAG00000002791;ENSBTAG00000002881;ENSBTAG00000003619;ENSBTAG00000003708;ENSBTAG00000004333;ENSBTAG00000005016;ENSBTAG00000005384;ENSBTAG00000005542;ENSBTAG00000006556;ENSBTAG00000006690;ENSBTAG00000007933;ENSBTAG00000009034;ENSBTAG00000009726;ENSBTAG00000009915;ENSBTAG00000009990;ENSBTAG00000010292;…
Cellular Component	GO:0048475	coated membrane	41	82	1.41001e-07	1.96093e-06	ENSBTAG00000000807;ENSBTAG00000001189;ENSBTAG00000001407;ENSBTAG00000001657;ENSBTAG00000002769;ENSBTAG00000002791;ENSBTAG00000002881;ENSBTAG00000003619;ENSBTAG00000003708;ENSBTAG00000004333;ENSBTAG00000005016;ENSBTAG00000005384;ENSBTAG00000005542;ENSBTAG00000006556;ENSBTAG00000006690;ENSBTAG00000007933;ENSBTAG00000009034;ENSBTAG00000009726;ENSBTAG00000009915;ENSBTAG00000009990;ENSBTAG00000010292;…
Cellular Component	GO:0000123	histone acetyltransferase complex	41	86	7.24101e-07	8.84505e-06	ENSBTAG00000000252;ENSBTAG00000000746;ENSBTAG00000000902;ENSBTAG00000001311;ENSBTAG00000001552;ENSBTAG00000002295;ENSBTAG00000002625;ENSBTAG00000002693;ENSBTAG00000002920;ENSBTAG00000004271;ENSBTAG00000004497;ENSBTAG00000005124;ENSBTAG00000005578;ENSBTAG00000007113;ENSBTAG00000007776;ENSBTAG00000007961;ENSBTAG00000008737;ENSBTAG00000008978;ENSBTAG00000009123;ENSBTAG00000009278;ENSBTAG00000010375;…
Cellular Component	GO:0005684	U2-type spliceosomal complex	41	86	7.24101e-07	8.84505e-06	ENSBTAG00000002720;ENSBTAG00000002830;ENSBTAG00000003094;ENSBTAG00000003407;ENSBTAG00000004571;ENSBTAG00000005441;ENSBTAG00000005634;ENSBTAG00000006104;ENSBTAG00000006250;ENSBTAG00000006423;ENSBTAG00000006960;ENSBTAG00000007234;ENSBTAG00000007299;ENSBTAG00000007363;ENSBTAG00000007913;ENSBTAG00000008136;ENSBTAG00000008339;ENSBTAG00000008472;ENSBTAG00000008578;ENSBTAG00000008915;ENSBTAG00000010627;…
Cellular Component	GO:0005741	mitochondrial outer membrane	41	122	0.00668949	0.0341823	ENSBTAG00000000428;ENSBTAG00000000562;ENSBTAG00000001165;ENSBTAG00000001781;ENSBTAG00000002295;ENSBTAG00000002296;ENSBTAG00000002412;ENSBTAG00000005314;ENSBTAG00000006084;ENSBTAG00000006526;ENSBTAG00000006693;ENSBTAG00000007668;ENSBTAG00000007900;ENSBTAG00000008040;ENSBTAG00000009213;ENSBTAG00000009784;ENSBTAG00000010001;ENSBTAG00000010083;ENSBTAG00000011198;ENSBTAG00000012380;ENSBTAG00000012675;…
Cellular Component	GO:0016591	DNA-directed RNA polymerase II, holoenzyme	40	102	0.000259142	0.00195298	ENSBTAG00000000579;ENSBTAG00000000642;ENSBTAG00000001069;ENSBTAG00000001671;ENSBTAG00000001856;ENSBTAG00000002072;ENSBTAG00000002970;ENSBTAG00000003460;ENSBTAG00000004820;ENSBTAG00000005086;ENSBTAG00000005160;ENSBTAG00000006235;ENSBTAG00000007620;ENSBTAG00000007961;ENSBTAG00000008543;ENSBTAG00000010455;ENSBTAG00000010505;ENSBTAG00000011339;ENSBTAG00000011790;ENSBTAG00000012070;ENSBTAG00000012691;…
Cellular Component	GO:0019897	extrinsic component of plasma membrane	40	125	0.0174533	0.0722224	ENSBTAG00000000215;ENSBTAG00000001523;ENSBTAG00000002411;ENSBTAG00000002767;ENSBTAG00000002941;ENSBTAG00000003300;ENSBTAG00000005958;ENSBTAG00000006323;ENSBTAG00000006609;ENSBTAG00000008122;ENSBTAG00000008717;ENSBTAG00000008938;ENSBTAG00000009087;ENSBTAG00000009543;ENSBTAG00000009578;ENSBTAG00000009778;ENSBTAG00000011349;ENSBTAG00000011683;ENSBTAG00000011916;ENSBTAG00000012441;ENSBTAG00000012784;…
Cellular Component	GO:0071013	catalytic step 2 spliceosome	39	80	6.54178e-07	8.29351e-06	ENSBTAG00000002086;ENSBTAG00000003094;ENSBTAG00000003407;ENSBTAG00000005634;ENSBTAG00000006114;ENSBTAG00000007234;ENSBTAG00000007299;ENSBTAG00000007363;ENSBTAG00000007913;ENSBTAG00000008136;ENSBTAG00000008339;ENSBTAG00000008472;ENSBTAG00000008915;ENSBTAG00000009389;ENSBTAG00000009514;ENSBTAG00000010518;ENSBTAG00000010627;ENSBTAG00000011360;ENSBTAG00000011488;ENSBTAG00000011656;ENSBTAG00000012177;…
Cellular Component	GO:0005776	autophagosome	38	72	6.38327e-08	1.00128e-06	ENSBTAG00000000878;ENSBTAG00000001548;ENSBTAG00000001632;ENSBTAG00000002296;ENSBTAG00000003928;ENSBTAG00000003942;ENSBTAG00000005362;ENSBTAG00000005400;ENSBTAG00000005493;ENSBTAG00000005504;ENSBTAG00000006499;ENSBTAG00000006550;ENSBTAG00000006768;ENSBTAG00000007399;ENSBTAG00000007935;ENSBTAG00000008016;ENSBTAG00000009693;ENSBTAG00000010242;ENSBTAG00000011041;ENSBTAG00000011491;ENSBTAG00000011765;…
Cellular Component	GO:0034708	methyltransferase complex	37	84	2.38345e-05	0.000224845	ENSBTAG00000000023;ENSBTAG00000000131;ENSBTAG00000000978;ENSBTAG00000001634;ENSBTAG00000002095;ENSBTAG00000002210;ENSBTAG00000002345;ENSBTAG00000002820;ENSBTAG00000002960;ENSBTAG00000003789;ENSBTAG00000006246;ENSBTAG00000006646;ENSBTAG00000007930;ENSBTAG00000007974;ENSBTAG00000009142;ENSBTAG00000010818;ENSBTAG00000010890;ENSBTAG00000010904;ENSBTAG00000011849;ENSBTAG00000011904;ENSBTAG00000012177;…
Cellular Component	GO:0000792	heterochromatin	36	63	8.7912e-09	1.58124e-07	ENSBTAG00000000023;ENSBTAG00000000385;ENSBTAG00000002078;ENSBTAG00000002224;ENSBTAG00000002260;ENSBTAG00000002736;ENSBTAG00000003421;ENSBTAG00000004593;ENSBTAG00000004706;ENSBTAG00000005197;ENSBTAG00000005979;ENSBTAG00000006246;ENSBTAG00000006551;ENSBTAG00000009516;ENSBTAG00000010982;ENSBTAG00000012534;ENSBTAG00000012698;ENSBTAG00000014023;ENSBTAG00000015584;ENSBTAG00000015779;ENSBTAG00000016105;…
Cellular Component	GO:0030662	coated vesicle membrane	36	65	2.70478e-08	4.56093e-07	ENSBTAG00000000807;ENSBTAG00000001657;ENSBTAG00000002769;ENSBTAG00000002791;ENSBTAG00000003619;ENSBTAG00000003708;ENSBTAG00000004333;ENSBTAG00000004463;ENSBTAG00000005016;ENSBTAG00000005384;ENSBTAG00000006556;ENSBTAG00000006690;ENSBTAG00000007712;ENSBTAG00000007933;ENSBTAG00000009237;ENSBTAG00000009726;ENSBTAG00000009915;ENSBTAG00000010292;ENSBTAG00000010378;ENSBTAG00000010740;ENSBTAG00000013212;…
Cellular Component	GO:0005657	replication fork	36	67	7.72601e-08	1.15804e-06	ENSBTAG00000000252;ENSBTAG00000000590;ENSBTAG00000000629;ENSBTAG00000001069;ENSBTAG00000002224;ENSBTAG00000002736;ENSBTAG00000003843;ENSBTAG00000005197;ENSBTAG00000006015;ENSBTAG00000006065;ENSBTAG00000006225;ENSBTAG00000007137;ENSBTAG00000007234;ENSBTAG00000007749;ENSBTAG00000007937;ENSBTAG00000008170;ENSBTAG00000009711;ENSBTAG00000010982;ENSBTAG00000011455;ENSBTAG00000011727;ENSBTAG00000011997;…
Cellular Component	GO:0000781	chromosome, telomeric region	36	82	3.33268e-05	0.00030855	ENSBTAG00000000064;ENSBTAG00000001415;ENSBTAG00000001463;ENSBTAG00000002073;ENSBTAG00000002718;ENSBTAG00000002918;ENSBTAG00000002960;ENSBTAG00000003354;ENSBTAG00000003693;ENSBTAG00000004021;ENSBTAG00000004509;ENSBTAG00000004956;ENSBTAG00000006142;ENSBTAG00000006166;ENSBTAG00000006225;ENSBTAG00000006246;ENSBTAG00000006933;ENSBTAG00000007617;ENSBTAG00000010118;ENSBTAG00000010426;ENSBTAG00000010819;…
Cellular Component	GO:1902911	protein kinase complex	36	85	8.3628e-05	0.000723168	ENSBTAG00000000599;ENSBTAG00000000878;ENSBTAG00000001528;ENSBTAG00000002072;ENSBTAG00000002363;ENSBTAG00000002625;ENSBTAG00000002917;ENSBTAG00000004021;ENSBTAG00000004695;ENSBTAG00000004906;ENSBTAG00000005160;ENSBTAG00000005269;ENSBTAG00000005492;ENSBTAG00000005792;ENSBTAG00000005861;ENSBTAG00000006065;ENSBTAG00000006268;ENSBTAG00000006640;ENSBTAG00000006642;ENSBTAG00000008136;ENSBTAG00000008353;…
Cellular Component	GO:0045335	phagocytic vesicle	35	68	4.66253e-07	6.16643e-06	ENSBTAG00000001332;ENSBTAG00000001483;ENSBTAG00000001700;ENSBTAG00000002280;ENSBTAG00000002381;ENSBTAG00000003525;ENSBTAG00000004282;ENSBTAG00000005362;ENSBTAG00000006162;ENSBTAG00000006189;ENSBTAG00000007330;ENSBTAG00000009784;ENSBTAG00000010193;ENSBTAG00000010242;ENSBTAG00000011209;ENSBTAG00000014838;ENSBTAG00000017135;ENSBTAG00000017803;ENSBTAG00000017970;ENSBTAG00000018053;ENSBTAG00000018247;…
Cellular Component	GO:0016605	PML body	34	72	8.15904e-06	8.20987e-05	ENSBTAG00000000526;ENSBTAG00000001014;ENSBTAG00000001069;ENSBTAG00000002605;ENSBTAG00000002918;ENSBTAG00000004695;ENSBTAG00000004956;ENSBTAG00000005504;ENSBTAG00000005564;ENSBTAG00000005905;ENSBTAG00000006640;ENSBTAG00000007935;ENSBTAG00000009711;ENSBTAG00000011322;ENSBTAG00000013951;ENSBTAG00000014023;ENSBTAG00000014181;ENSBTAG00000014884;ENSBTAG00000015591;ENSBTAG00000015779;ENSBTAG00000017087;…
Cellular Component	GO:1902554	serine/threonine protein kinase complex	34	79	8.87642e-05	0.000758142	ENSBTAG00000000599;ENSBTAG00000000878;ENSBTAG00000001528;ENSBTAG00000002072;ENSBTAG00000002363;ENSBTAG00000002625;ENSBTAG00000004021;ENSBTAG00000004695;ENSBTAG00000004906;ENSBTAG00000005160;ENSBTAG00000005269;ENSBTAG00000005492;ENSBTAG00000005792;ENSBTAG00000005861;ENSBTAG00000006065;ENSBTAG00000006268;ENSBTAG00000006640;ENSBTAG00000006642;ENSBTAG00000008136;ENSBTAG00000008353;ENSBTAG00000010109;…
Cellular Component	GO:0043296	apical junction complex	34	108	0.0337771	0.124836	ENSBTAG00000000113;ENSBTAG00000001498;ENSBTAG00000001736;ENSBTAG00000002029;ENSBTAG00000002996;ENSBTAG00000004131;ENSBTAG00000006189;ENSBTAG00000006974;ENSBTAG00000008279;ENSBTAG00000011291;ENSBTAG00000011767;ENSBTAG00000011770;ENSBTAG00000014182;ENSBTAG00000014991;ENSBTAG00000015318;ENSBTAG00000015398;ENSBTAG00000015939;ENSBTAG00000015991;ENSBTAG00000016221;ENSBTAG00000016420;ENSBTAG00000017279;…
Cellular Component	GO:0070603	SWI/SNF superfamily-type complex	33	65	1.47445e-06	1.67146e-05	ENSBTAG00000001024;ENSBTAG00000002820;ENSBTAG00000003034;ENSBTAG00000003077;ENSBTAG00000003929;ENSBTAG00000003954;ENSBTAG00000005578;ENSBTAG00000006678;ENSBTAG00000006971;ENSBTAG00000007494;ENSBTAG00000009988;ENSBTAG00000010380;ENSBTAG00000010533;ENSBTAG00000011531;ENSBTAG00000011849;ENSBTAG00000012698;ENSBTAG00000013620;ENSBTAG00000014697;ENSBTAG00000014786;ENSBTAG00000014814;ENSBTAG00000015308;…
Cellular Component	GO:0010494	cytoplasmic stress granule	32	58	1.7957e-07	2.44687e-06	ENSBTAG00000000613;ENSBTAG00000000630;ENSBTAG00000001171;ENSBTAG00000002520;ENSBTAG00000003588;ENSBTAG00000004266;ENSBTAG00000004564;ENSBTAG00000006142;ENSBTAG00000006586;ENSBTAG00000007480;ENSBTAG00000009067;ENSBTAG00000009522;ENSBTAG00000009948;ENSBTAG00000011155;ENSBTAG00000011586;ENSBTAG00000012552;ENSBTAG00000014041;ENSBTAG00000014079;ENSBTAG00000016744;ENSBTAG00000017125;ENSBTAG00000017164;…
Cellular Component	GO:0000779	condensed chromosome, centromeric region	32	60	5.0623e-07	6.63014e-06	ENSBTAG00000000752;ENSBTAG00000001182;ENSBTAG00000001717;ENSBTAG00000002260;ENSBTAG00000002613;ENSBTAG00000003314;ENSBTAG00000004448;ENSBTAG00000004965;ENSBTAG00000005213;ENSBTAG00000006185;ENSBTAG00000006404;ENSBTAG00000007237;ENSBTAG00000008180;ENSBTAG00000009432;ENSBTAG00000010792;ENSBTAG00000011994;ENSBTAG00000013531;ENSBTAG00000013915;ENSBTAG00000013949;ENSBTAG00000014730;ENSBTAG00000015986;…
Cellular Component	GO:0034399	nuclear periphery	32	70	3.38364e-05	0.000310512	ENSBTAG00000000753;ENSBTAG00000001069;ENSBTAG00000001108;ENSBTAG00000002095;ENSBTAG00000002224;ENSBTAG00000003500;ENSBTAG00000003934;ENSBTAG00000006065;ENSBTAG00000006423;ENSBTAG00000006611;ENSBTAG00000007303;ENSBTAG00000008136;ENSBTAG00000008719;ENSBTAG00000009121;ENSBTAG00000009470;ENSBTAG00000011127;ENSBTAG00000011263;ENSBTAG00000012365;ENSBTAG00000012575;ENSBTAG00000013123;ENSBTAG00000013905;…
Cellular Component	GO:0030532	small nuclear ribonucleoprotein complex	32	71	4.78631e-05	0.000422008	ENSBTAG00000002279;ENSBTAG00000003094;ENSBTAG00000003407;ENSBTAG00000004571;ENSBTAG00000005441;ENSBTAG00000005634;ENSBTAG00000006104;ENSBTAG00000006353;ENSBTAG00000006423;ENSBTAG00000007299;ENSBTAG00000007363;ENSBTAG00000008578;ENSBTAG00000008915;ENSBTAG00000010691;ENSBTAG00000011488;ENSBTAG00000011656;ENSBTAG00000012177;ENSBTAG00000013526;ENSBTAG00000013593;ENSBTAG00000013946;ENSBTAG00000014490;…
Cellular Component	GO:0030136	clathrin-coated vesicle	32	86	0.00278837	0.0155434	ENSBTAG00000001657;ENSBTAG00000002352;ENSBTAG00000002402;ENSBTAG00000002769;ENSBTAG00000002939;ENSBTAG00000002977;ENSBTAG00000003075;ENSBTAG00000005016;ENSBTAG00000006071;ENSBTAG00000006323;ENSBTAG00000009915;ENSBTAG00000010018;ENSBTAG00000010292;ENSBTAG00000010696;ENSBTAG00000010740;ENSBTAG00000011683;ENSBTAG00000013025;ENSBTAG00000013282;ENSBTAG00000013329;ENSBTAG00000013869;ENSBTAG00000016708;…
Cellular Component	GO:0031256	leading edge membrane	32	94	0.0125325	0.057177	ENSBTAG00000000113;ENSBTAG00000000369;ENSBTAG00000000815;ENSBTAG00000001400;ENSBTAG00000001673;ENSBTAG00000001700;ENSBTAG00000002190;ENSBTAG00000004636;ENSBTAG00000004651;ENSBTAG00000005620;ENSBTAG00000006099;ENSBTAG00000006995;ENSBTAG00000007808;ENSBTAG00000008938;ENSBTAG00000011479;ENSBTAG00000011578;ENSBTAG00000011628;ENSBTAG00000015910;ENSBTAG00000017367;ENSBTAG00000017584;ENSBTAG00000017801;…
Cellular Component	GO:0005777	peroxisome	32	102	0.0403554	0.145481	ENSBTAG00000002296;ENSBTAG00000003746;ENSBTAG00000005482;ENSBTAG00000006200;ENSBTAG00000006978;ENSBTAG00000007537;ENSBTAG00000007840;ENSBTAG00000007900;ENSBTAG00000009061;ENSBTAG00000009698;ENSBTAG00000009897;ENSBTAG00000010867;ENSBTAG00000011095;ENSBTAG00000011826;ENSBTAG00000012519;ENSBTAG00000013538;ENSBTAG00000013545;ENSBTAG00000014093;ENSBTAG00000014633;ENSBTAG00000014752;ENSBTAG00000016791;…
Cellular Component	GO:0042579	microbody	32	102	0.0403554	0.145481	ENSBTAG00000002296;ENSBTAG00000003746;ENSBTAG00000005482;ENSBTAG00000006200;ENSBTAG00000006978;ENSBTAG00000007537;ENSBTAG00000007840;ENSBTAG00000007900;ENSBTAG00000009061;ENSBTAG00000009698;ENSBTAG00000009897;ENSBTAG00000010867;ENSBTAG00000011095;ENSBTAG00000011826;ENSBTAG00000012519;ENSBTAG00000013538;ENSBTAG00000013545;ENSBTAG00000014093;ENSBTAG00000014633;ENSBTAG00000014752;ENSBTAG00000016791;…
Cellular Component	GO:0005793	endoplasmic reticulum-Golgi intermediate compartment	31	59	1.16959e-06	1.3371e-05	ENSBTAG00000000073;ENSBTAG00000000807;ENSBTAG00000001027;ENSBTAG00000001394;ENSBTAG00000002296;ENSBTAG00000002378;ENSBTAG00000004463;ENSBTAG00000004829;ENSBTAG00000005694;ENSBTAG00000006014;ENSBTAG00000006045;ENSBTAG00000007662;ENSBTAG00000007712;ENSBTAG00000008016;ENSBTAG00000008034;ENSBTAG00000008300;ENSBTAG00000008862;ENSBTAG00000009307;ENSBTAG00000009738;ENSBTAG00000010563;ENSBTAG00000010612;…
Cellular Component	GO:0030175	filopodium	31	62	4.60674e-06	4.78037e-05	ENSBTAG00000000897;ENSBTAG00000001700;ENSBTAG00000001788;ENSBTAG00000003191;ENSBTAG00000003418;ENSBTAG00000005136;ENSBTAG00000005462;ENSBTAG00000006578;ENSBTAG00000007079;ENSBTAG00000007578;ENSBTAG00000007808;ENSBTAG00000009665;ENSBTAG00000010347;ENSBTAG00000011256;ENSBTAG00000012552;ENSBTAG00000013153;ENSBTAG00000015910;ENSBTAG00000016598;ENSBTAG00000017549;ENSBTAG00000019044;ENSBTAG00000019167;…
Cellular Component	GO:0097525	spliceosomal snRNP complex	31	67	3.33938e-05	0.00030855	ENSBTAG00000002279;ENSBTAG00000003094;ENSBTAG00000003407;ENSBTAG00000004571;ENSBTAG00000005441;ENSBTAG00000005634;ENSBTAG00000006104;ENSBTAG00000006353;ENSBTAG00000006423;ENSBTAG00000007299;ENSBTAG00000007363;ENSBTAG00000008578;ENSBTAG00000008915;ENSBTAG00000010691;ENSBTAG00000011488;ENSBTAG00000011656;ENSBTAG00000012177;ENSBTAG00000013526;ENSBTAG00000013593;ENSBTAG00000013946;ENSBTAG00000014490;…
Cellular Component	GO:0000932	cytoplasmic mRNA processing body	31	70	9.3938e-05	0.000787095	ENSBTAG00000000630;ENSBTAG00000001468;ENSBTAG00000002879;ENSBTAG00000003748;ENSBTAG00000003807;ENSBTAG00000004376;ENSBTAG00000005634;ENSBTAG00000005913;ENSBTAG00000006417;ENSBTAG00000007308;ENSBTAG00000007363;ENSBTAG00000008991;ENSBTAG00000009067;ENSBTAG00000009522;ENSBTAG00000009785;ENSBTAG00000009912;ENSBTAG00000010863;ENSBTAG00000012253;ENSBTAG00000013175;ENSBTAG00000014297;ENSBTAG00000014900;…
Cellular Component	GO:0031902	late endosome membrane	31	79	0.00120447	0.00759264	ENSBTAG00000001659;ENSBTAG00000003001;ENSBTAG00000004307;ENSBTAG00000005622;ENSBTAG00000006574;ENSBTAG00000007399;ENSBTAG00000007923;ENSBTAG00000009368;ENSBTAG00000010193;ENSBTAG00000010355;ENSBTAG00000010492;ENSBTAG00000011147;ENSBTAG00000011491;ENSBTAG00000011931;ENSBTAG00000012902;ENSBTAG00000014809;ENSBTAG00000014970;ENSBTAG00000015958;ENSBTAG00000016959;ENSBTAG00000018803;ENSBTAG00000019150;…
Cellular Component	GO:0017053	transcriptional repressor complex	30	58	2.6636e-06	2.85175e-05	ENSBTAG00000002820;ENSBTAG00000003021;ENSBTAG00000003034;ENSBTAG00000003397;ENSBTAG00000004037;ENSBTAG00000006246;ENSBTAG00000006678;ENSBTAG00000006743;ENSBTAG00000007659;ENSBTAG00000008480;ENSBTAG00000008737;ENSBTAG00000009985;ENSBTAG00000010671;ENSBTAG00000011789;ENSBTAG00000011849;ENSBTAG00000012698;ENSBTAG00000013271;ENSBTAG00000015976;ENSBTAG00000017360;ENSBTAG00000017514;ENSBTAG00000017764;…
Cellular Component	GO:0030863	cortical cytoskeleton	30	88	0.0149638	0.0640829	ENSBTAG00000002996;ENSBTAG00000003908;ENSBTAG00000004072;ENSBTAG00000004553;ENSBTAG00000004554;ENSBTAG00000004635;ENSBTAG00000004643;ENSBTAG00000006071;ENSBTAG00000006323;ENSBTAG00000006667;ENSBTAG00000006995;ENSBTAG00000009617;ENSBTAG00000010073;ENSBTAG00000010402;ENSBTAG00000010981;ENSBTAG00000012575;ENSBTAG00000013153;ENSBTAG00000013607;ENSBTAG00000013658;ENSBTAG00000013953;ENSBTAG00000015991;…
Cellular Component	GO:0071011	precatalytic spliceosome	29	60	2.13585e-05	0.000202906	ENSBTAG00000002720;ENSBTAG00000003094;ENSBTAG00000003407;ENSBTAG00000004571;ENSBTAG00000005441;ENSBTAG00000005634;ENSBTAG00000006104;ENSBTAG00000006423;ENSBTAG00000006960;ENSBTAG00000007299;ENSBTAG00000007363;ENSBTAG00000008578;ENSBTAG00000008915;ENSBTAG00000010627;ENSBTAG00000011488;ENSBTAG00000011656;ENSBTAG00000012177;ENSBTAG00000012683;ENSBTAG00000013526;ENSBTAG00000013593;ENSBTAG00000013946;…
Cellular Component	GO:0035097	histone methyltransferase complex	29	66	0.000184788	0.00147502	ENSBTAG00000000023;ENSBTAG00000000131;ENSBTAG00000000978;ENSBTAG00000001634;ENSBTAG00000002095;ENSBTAG00000002210;ENSBTAG00000002345;ENSBTAG00000002820;ENSBTAG00000002960;ENSBTAG00000006246;ENSBTAG00000007930;ENSBTAG00000010818;ENSBTAG00000010890;ENSBTAG00000010904;ENSBTAG00000011849;ENSBTAG00000011904;ENSBTAG00000012564;ENSBTAG00000012999;ENSBTAG00000014023;ENSBTAG00000015946;ENSBTAG00000016958;…
Cellular Component	GO:0005884	actin filament	29	86	0.0192886	0.0779053	ENSBTAG00000000322;ENSBTAG00000001081;ENSBTAG00000001332;ENSBTAG00000002996;ENSBTAG00000004553;ENSBTAG00000005190;ENSBTAG00000006071;ENSBTAG00000006189;ENSBTAG00000007079;ENSBTAG00000007825;ENSBTAG00000008938;ENSBTAG00000009554;ENSBTAG00000010191;ENSBTAG00000010347;ENSBTAG00000011256;ENSBTAG00000011567;ENSBTAG00000012504;ENSBTAG00000012818;ENSBTAG00000013749;ENSBTAG00000016221;ENSBTAG00000016549;…
Cellular Component	GO:0008287	protein serine/threonine phosphatase complex	28	46	6.06848e-08	9.63103e-07	ENSBTAG00000000469;ENSBTAG00000000545;ENSBTAG00000000754;ENSBTAG00000001294;ENSBTAG00000001933;ENSBTAG00000002960;ENSBTAG00000005533;ENSBTAG00000006933;ENSBTAG00000007709;ENSBTAG00000009245;ENSBTAG00000009822;ENSBTAG00000010619;ENSBTAG00000011198;ENSBTAG00000012146;ENSBTAG00000012447;ENSBTAG00000012928;ENSBTAG00000014609;ENSBTAG00000015146;ENSBTAG00000018317;ENSBTAG00000019443;ENSBTAG00000019525;…
Cellular Component	GO:1903293	phosphatase complex	28	46	6.06848e-08	9.63103e-07	ENSBTAG00000000469;ENSBTAG00000000545;ENSBTAG00000000754;ENSBTAG00000001294;ENSBTAG00000001933;ENSBTAG00000002960;ENSBTAG00000005533;ENSBTAG00000006933;ENSBTAG00000007709;ENSBTAG00000009245;ENSBTAG00000009822;ENSBTAG00000010619;ENSBTAG00000011198;ENSBTAG00000012146;ENSBTAG00000012447;ENSBTAG00000012928;ENSBTAG00000014609;ENSBTAG00000015146;ENSBTAG00000018317;ENSBTAG00000019443;ENSBTAG00000019525;…
Cellular Component	GO:0000118	histone deacetylase complex	28	59	4.48825e-05	0.000398332	ENSBTAG00000001161;ENSBTAG00000002820;ENSBTAG00000003034;ENSBTAG00000004000;ENSBTAG00000006246;ENSBTAG00000006678;ENSBTAG00000009330;ENSBTAG00000009985;ENSBTAG00000010063;ENSBTAG00000011849;ENSBTAG00000012698;ENSBTAG00000013244;ENSBTAG00000013271;ENSBTAG00000013580;ENSBTAG00000015976;ENSBTAG00000016254;ENSBTAG00000017360;ENSBTAG00000017764;ENSBTAG00000018112;ENSBTAG00000019757;ENSBTAG00000020117;…
Cellular Component	GO:0005795	Golgi stack	28	68	0.000849426	0.00570087	ENSBTAG00000001977;ENSBTAG00000004870;ENSBTAG00000005614;ENSBTAG00000005809;ENSBTAG00000007357;ENSBTAG00000008442;ENSBTAG00000008863;ENSBTAG00000008939;ENSBTAG00000009738;ENSBTAG00000011041;ENSBTAG00000011317;ENSBTAG00000011625;ENSBTAG00000011748;ENSBTAG00000011879;ENSBTAG00000012626;ENSBTAG00000014230;ENSBTAG00000015249;ENSBTAG00000016904;ENSBTAG00000019819;ENSBTAG00000020314;ENSBTAG00000020539;…
Cellular Component	GO:0030120	vesicle coat	27	46	3.00191e-07	4.00948e-06	ENSBTAG00000000807;ENSBTAG00000001657;ENSBTAG00000002769;ENSBTAG00000002791;ENSBTAG00000003619;ENSBTAG00000003708;ENSBTAG00000004333;ENSBTAG00000005384;ENSBTAG00000006556;ENSBTAG00000006690;ENSBTAG00000007933;ENSBTAG00000009726;ENSBTAG00000009915;ENSBTAG00000010292;ENSBTAG00000010378;ENSBTAG00000010740;ENSBTAG00000013212;ENSBTAG00000013282;ENSBTAG00000014843;ENSBTAG00000016708;ENSBTAG00000017771;…
Cellular Component	GO:0000777	condensed chromosome kinetochore	27	47	5.48093e-07	7.04169e-06	ENSBTAG00000001182;ENSBTAG00000002613;ENSBTAG00000003314;ENSBTAG00000004448;ENSBTAG00000004965;ENSBTAG00000005213;ENSBTAG00000006185;ENSBTAG00000006404;ENSBTAG00000007237;ENSBTAG00000008180;ENSBTAG00000009432;ENSBTAG00000010792;ENSBTAG00000011994;ENSBTAG00000013531;ENSBTAG00000013915;ENSBTAG00000013949;ENSBTAG00000015986;ENSBTAG00000018216;ENSBTAG00000019781;ENSBTAG00000020861;ENSBTAG00000020865;…
Cellular Component	GO:0016363	nuclear matrix	27	58	9.27007e-05	0.000781583	ENSBTAG00000000753;ENSBTAG00000001069;ENSBTAG00000001108;ENSBTAG00000002095;ENSBTAG00000002224;ENSBTAG00000003500;ENSBTAG00000003934;ENSBTAG00000006423;ENSBTAG00000007303;ENSBTAG00000008136;ENSBTAG00000008719;ENSBTAG00000009121;ENSBTAG00000009470;ENSBTAG00000012365;ENSBTAG00000012575;ENSBTAG00000013123;ENSBTAG00000013905;ENSBTAG00000013949;ENSBTAG00000015779;ENSBTAG00000016328;ENSBTAG00000017761;…
Cellular Component	GO:0005798	Golgi-associated vesicle	27	60	0.000188341	0.0014858	ENSBTAG00000000807;ENSBTAG00000002402;ENSBTAG00000002769;ENSBTAG00000002939;ENSBTAG00000003109;ENSBTAG00000004333;ENSBTAG00000004463;ENSBTAG00000005384;ENSBTAG00000005481;ENSBTAG00000005809;ENSBTAG00000006556;ENSBTAG00000006690;ENSBTAG00000007933;ENSBTAG00000009026;ENSBTAG00000009237;ENSBTAG00000010018;ENSBTAG00000010292;ENSBTAG00000010740;ENSBTAG00000011831;ENSBTAG00000013212;ENSBTAG00000014843;…
Cellular Component	GO:0030427	site of polarized growth	27	68	0.00198178	0.0116236	ENSBTAG00000000137;ENSBTAG00000002650;ENSBTAG00000003191;ENSBTAG00000004333;ENSBTAG00000005462;ENSBTAG00000006071;ENSBTAG00000006270;ENSBTAG00000007578;ENSBTAG00000007910;ENSBTAG00000008525;ENSBTAG00000010624;ENSBTAG00000010696;ENSBTAG00000011190;ENSBTAG00000011400;ENSBTAG00000011757;ENSBTAG00000012552;ENSBTAG00000017422;ENSBTAG00000017547;ENSBTAG00000017753;ENSBTAG00000018564;ENSBTAG00000020281;…
Cellular Component	GO:0031901	early endosome membrane	27	69	0.00253969	0.0142752	ENSBTAG00000001887;ENSBTAG00000002014;ENSBTAG00000002352;ENSBTAG00000002658;ENSBTAG00000002966;ENSBTAG00000005622;ENSBTAG00000007871;ENSBTAG00000007962;ENSBTAG00000008579;ENSBTAG00000011383;ENSBTAG00000011491;ENSBTAG00000011628;ENSBTAG00000011757;ENSBTAG00000016128;ENSBTAG00000017803;ENSBTAG00000018247;ENSBTAG00000018801;ENSBTAG00000019150;ENSBTAG00000019225;ENSBTAG00000019526;ENSBTAG00000020130;…
Cellular Component	GO:0044853	plasma membrane raft	27	78	0.016467	0.0694189	ENSBTAG00000000231;ENSBTAG00000000717;ENSBTAG00000000736;ENSBTAG00000004457;ENSBTAG00000006420;ENSBTAG00000006642;ENSBTAG00000007993;ENSBTAG00000008938;ENSBTAG00000009903;ENSBTAG00000010073;ENSBTAG00000010347;ENSBTAG00000010526;ENSBTAG00000013244;ENSBTAG00000013287;ENSBTAG00000014182;ENSBTAG00000014269;ENSBTAG00000015991;ENSBTAG00000016156;ENSBTAG00000016420;ENSBTAG00000017869;ENSBTAG00000019290;…
Cellular Component	GO:0005811	lipid particle	26	62	0.000927791	0.00607568	ENSBTAG00000000944;ENSBTAG00000001165;ENSBTAG00000003804;ENSBTAG00000005190;ENSBTAG00000005482;ENSBTAG00000005718;ENSBTAG00000007058;ENSBTAG00000008040;ENSBTAG00000009231;ENSBTAG00000010193;ENSBTAG00000011041;ENSBTAG00000012833;ENSBTAG00000013449;ENSBTAG00000014366;ENSBTAG00000016516;ENSBTAG00000016658;ENSBTAG00000017258;ENSBTAG00000017402;ENSBTAG00000017744;ENSBTAG00000018936;ENSBTAG00000019443;…
Cellular Component	GO:0031234	extrinsic component of cytoplasmic side of plasma membrane	26	76	0.0214115	0.0842103	ENSBTAG00000000215;ENSBTAG00000001523;ENSBTAG00000002767;ENSBTAG00000002941;ENSBTAG00000005958;ENSBTAG00000006323;ENSBTAG00000006609;ENSBTAG00000008122;ENSBTAG00000008938;ENSBTAG00000009087;ENSBTAG00000009543;ENSBTAG00000009578;ENSBTAG00000009778;ENSBTAG00000012784;ENSBTAG00000013016;ENSBTAG00000014501;ENSBTAG00000016769;ENSBTAG00000017402;ENSBTAG00000017871;ENSBTAG00000020034;ENSBTAG00000020645;…
Cellular Component	GO:0071005	U2-type precatalytic spliceosome	25	39	7.18362e-08	1.08884e-06	ENSBTAG00000002720;ENSBTAG00000003094;ENSBTAG00000004571;ENSBTAG00000005441;ENSBTAG00000005634;ENSBTAG00000006104;ENSBTAG00000006423;ENSBTAG00000006960;ENSBTAG00000007299;ENSBTAG00000007363;ENSBTAG00000008578;ENSBTAG00000008915;ENSBTAG00000010627;ENSBTAG00000011488;ENSBTAG00000011656;ENSBTAG00000012177;ENSBTAG00000012683;ENSBTAG00000013526;ENSBTAG00000013593;ENSBTAG00000013946;ENSBTAG00000015034;…
Cellular Component	GO:0030134	ER to Golgi transport vesicle	25	40	1.48884e-07	2.04944e-06	ENSBTAG00000000807;ENSBTAG00000001977;ENSBTAG00000002791;ENSBTAG00000003619;ENSBTAG00000003708;ENSBTAG00000007712;ENSBTAG00000008034;ENSBTAG00000009726;ENSBTAG00000010378;ENSBTAG00000010612;ENSBTAG00000011096;ENSBTAG00000012758;ENSBTAG00000013145;ENSBTAG00000015782;ENSBTAG00000015955;ENSBTAG00000015958;ENSBTAG00000017753;ENSBTAG00000017825;ENSBTAG00000018295;ENSBTAG00000018322;ENSBTAG00000023933;…
Cellular Component	GO:0005643	nuclear pore	25	48	1.5342e-05	0.000151068	ENSBTAG00000000022;ENSBTAG00000000152;ENSBTAG00000001749;ENSBTAG00000002458;ENSBTAG00000003665;ENSBTAG00000004965;ENSBTAG00000006611;ENSBTAG00000007844;ENSBTAG00000009488;ENSBTAG00000010196;ENSBTAG00000010613;ENSBTAG00000010792;ENSBTAG00000010934;ENSBTAG00000010955;ENSBTAG00000011127;ENSBTAG00000011507;ENSBTAG00000013949;ENSBTAG00000017652;ENSBTAG00000017825;ENSBTAG00000021125;ENSBTAG00000021896;…
Cellular Component	GO:0008023	transcription elongation factor complex	25	50	3.79608e-05	0.000346007	ENSBTAG00000000375;ENSBTAG00000001671;ENSBTAG00000002277;ENSBTAG00000004695;ENSBTAG00000005861;ENSBTAG00000006640;ENSBTAG00000007214;ENSBTAG00000007749;ENSBTAG00000008136;ENSBTAG00000009482;ENSBTAG00000010467;ENSBTAG00000014158;ENSBTAG00000015566;ENSBTAG00000016703;ENSBTAG00000017921;ENSBTAG00000018488;ENSBTAG00000018501;ENSBTAG00000018636;ENSBTAG00000018783;ENSBTAG00000018954;ENSBTAG00000019193;…
Cellular Component	GO:0035861	site of double-strand break	25	55	0.000265768	0.00199179	ENSBTAG00000000039;ENSBTAG00000000837;ENSBTAG00000001069;ENSBTAG00000001071;ENSBTAG00000001634;ENSBTAG00000002295;ENSBTAG00000002918;ENSBTAG00000003354;ENSBTAG00000003843;ENSBTAG00000004460;ENSBTAG00000006015;ENSBTAG00000006225;ENSBTAG00000006235;ENSBTAG00000006551;ENSBTAG00000006743;ENSBTAG00000012077;ENSBTAG00000012142;ENSBTAG00000013168;ENSBTAG00000014366;ENSBTAG00000017061;ENSBTAG00000019275;…
Cellular Component	GO:0045171	intercellular bridge	25	62	0.0022297	0.0127452	ENSBTAG00000000660;ENSBTAG00000001403;ENSBTAG00000002608;ENSBTAG00000003927;ENSBTAG00000005129;ENSBTAG00000006667;ENSBTAG00000007545;ENSBTAG00000008147;ENSBTAG00000008645;ENSBTAG00000008758;ENSBTAG00000009855;ENSBTAG00000009983;ENSBTAG00000010384;ENSBTAG00000011591;ENSBTAG00000012213;ENSBTAG00000013403;ENSBTAG00000014326;ENSBTAG00000014779;ENSBTAG00000016307;ENSBTAG00000018643;ENSBTAG00000019202;…
Cellular Component	GO:0042641	actomyosin	24	53	0.000375698	0.00272482	ENSBTAG00000000746;ENSBTAG00000001081;ENSBTAG00000002633;ENSBTAG00000003191;ENSBTAG00000004553;ENSBTAG00000004896;ENSBTAG00000005984;ENSBTAG00000007079;ENSBTAG00000009578;ENSBTAG00000010402;ENSBTAG00000010677;ENSBTAG00000011473;ENSBTAG00000012342;ENSBTAG00000012818;ENSBTAG00000013744;ENSBTAG00000016456;ENSBTAG00000017764;ENSBTAG00000017970;ENSBTAG00000018225;ENSBTAG00000018725;ENSBTAG00000021372;…
Cellular Component	GO:0005876	spindle microtubule	24	61	0.00395138	0.0210688	ENSBTAG00000001575;ENSBTAG00000001717;ENSBTAG00000003215;ENSBTAG00000003314;ENSBTAG00000005663;ENSBTAG00000008088;ENSBTAG00000008350;ENSBTAG00000010109;ENSBTAG00000013009;ENSBTAG00000013436;ENSBTAG00000014583;ENSBTAG00000015022;ENSBTAG00000016708;ENSBTAG00000016806;ENSBTAG00000017727;ENSBTAG00000018216;ENSBTAG00000018806;ENSBTAG00000019278;ENSBTAG00000019781;ENSBTAG00000019986;ENSBTAG00000021680;…
Cellular Component	GO:0030426	growth cone	24	62	0.00503875	0.0261434	ENSBTAG00000002650;ENSBTAG00000003191;ENSBTAG00000004333;ENSBTAG00000005462;ENSBTAG00000006270;ENSBTAG00000007578;ENSBTAG00000007910;ENSBTAG00000008525;ENSBTAG00000010624;ENSBTAG00000010696;ENSBTAG00000011190;ENSBTAG00000011400;ENSBTAG00000011757;ENSBTAG00000012552;ENSBTAG00000017422;ENSBTAG00000017753;ENSBTAG00000018564;ENSBTAG00000020281;ENSBTAG00000020305;ENSBTAG00000020758;ENSBTAG00000021275;…
Cellular Component	GO:1903561	extracellular vesicle	24	66	0.0121428	0.0568312	ENSBTAG00000005726;ENSBTAG00000006189;ENSBTAG00000007399;ENSBTAG00000008300;ENSBTAG00000008913;ENSBTAG00000010390;ENSBTAG00000010663;ENSBTAG00000012147;ENSBTAG00000012927;ENSBTAG00000013011;ENSBTAG00000013468;ENSBTAG00000013533;ENSBTAG00000013563;ENSBTAG00000015683;ENSBTAG00000018972;ENSBTAG00000019552;ENSBTAG00000027924;ENSBTAG00000032719;ENSBTAG00000032914;ENSBTAG00000039509;ENSBTAG00000046339;…
Cellular Component	GO:0000502	proteasome complex	24	67	0.0148102	0.0636275	ENSBTAG00000000990;ENSBTAG00000001548;ENSBTAG00000002045;ENSBTAG00000002423;ENSBTAG00000002487;ENSBTAG00000003039;ENSBTAG00000003067;ENSBTAG00000005076;ENSBTAG00000005127;ENSBTAG00000006564;ENSBTAG00000008083;ENSBTAG00000009414;ENSBTAG00000012726;ENSBTAG00000015116;ENSBTAG00000015732;ENSBTAG00000018425;ENSBTAG00000018897;ENSBTAG00000019918;ENSBTAG00000020123;ENSBTAG00000020262;ENSBTAG00000020431;…
Cellular Component	GO:0043230	extracellular organelle	24	68	0.0179227	0.0739378	ENSBTAG00000005726;ENSBTAG00000006189;ENSBTAG00000007399;ENSBTAG00000008300;ENSBTAG00000008913;ENSBTAG00000010390;ENSBTAG00000010663;ENSBTAG00000012147;ENSBTAG00000012927;ENSBTAG00000013011;ENSBTAG00000013468;ENSBTAG00000013533;ENSBTAG00000013563;ENSBTAG00000015683;ENSBTAG00000018972;ENSBTAG00000019552;ENSBTAG00000027924;ENSBTAG00000032719;ENSBTAG00000032914;ENSBTAG00000039509;ENSBTAG00000046339;…
Cellular Component	GO:0098573	intrinsic component of mitochondrial membrane	24	71	0.0303951	0.112956	ENSBTAG00000000428;ENSBTAG00000001475;ENSBTAG00000001781;ENSBTAG00000003307;ENSBTAG00000003876;ENSBTAG00000005314;ENSBTAG00000005807;ENSBTAG00000006084;ENSBTAG00000007900;ENSBTAG00000009006;ENSBTAG00000010001;ENSBTAG00000010566;ENSBTAG00000011250;ENSBTAG00000012041;ENSBTAG00000013413;ENSBTAG00000014536;ENSBTAG00000017053;ENSBTAG00000019911;ENSBTAG00000020850;ENSBTAG00000021780;ENSBTAG00000024723;…
Cellular Component	GO:0031519	PcG protein complex	23	43	1.89931e-05	0.000181714	ENSBTAG00000000023;ENSBTAG00000001634;ENSBTAG00000002820;ENSBTAG00000004271;ENSBTAG00000004603;ENSBTAG00000004964;ENSBTAG00000009879;ENSBTAG00000010818;ENSBTAG00000011849;ENSBTAG00000013784;ENSBTAG00000014017;ENSBTAG00000014023;ENSBTAG00000015584;ENSBTAG00000016958;ENSBTAG00000018205;ENSBTAG00000018752;ENSBTAG00000020819;ENSBTAG00000021677;ENSBTAG00000022689;ENSBTAG00000031402;ENSBTAG00000038306;…
Cellular Component	GO:0005788	endoplasmic reticulum lumen	23	51	0.000531171	0.00373203	ENSBTAG00000000073;ENSBTAG00000001116;ENSBTAG00000001928;ENSBTAG00000002837;ENSBTAG00000003362;ENSBTAG00000005928;ENSBTAG00000006045;ENSBTAG00000006665;ENSBTAG00000007152;ENSBTAG00000007360;ENSBTAG00000007662;ENSBTAG00000008068;ENSBTAG00000011024;ENSBTAG00000012678;ENSBTAG00000016481;ENSBTAG00000017143;ENSBTAG00000017196;ENSBTAG00000019237;ENSBTAG00000020305;ENSBTAG00000031797;ENSBTAG00000032996;…
Cellular Component	GO:0032587	ruffle membrane	23	51	0.000531171	0.00373203	ENSBTAG00000000113;ENSBTAG00000000369;ENSBTAG00000001400;ENSBTAG00000001673;ENSBTAG00000004636;ENSBTAG00000004651;ENSBTAG00000005620;ENSBTAG00000006099;ENSBTAG00000008938;ENSBTAG00000011479;ENSBTAG00000011628;ENSBTAG00000015910;ENSBTAG00000017367;ENSBTAG00000017584;ENSBTAG00000018852;ENSBTAG00000019290;ENSBTAG00000020938;ENSBTAG00000021455;ENSBTAG00000022147;ENSBTAG00000030784;ENSBTAG00000049864;…
Cellular Component	GO:0016234	inclusion body	23	53	0.00102523	0.00658586	ENSBTAG00000000152;ENSBTAG00000001657;ENSBTAG00000003075;ENSBTAG00000005542;ENSBTAG00000006708;ENSBTAG00000006884;ENSBTAG00000009488;ENSBTAG00000010180;ENSBTAG00000010664;ENSBTAG00000011757;ENSBTAG00000012142;ENSBTAG00000012481;ENSBTAG00000012904;ENSBTAG00000013244;ENSBTAG00000015591;ENSBTAG00000016896;ENSBTAG00000019298;ENSBTAG00000020634;ENSBTAG00000021677;ENSBTAG00000021756;ENSBTAG00000024708;…
Cellular Component	GO:0032432	actin filament bundle	23	53	0.00102523	0.00658586	ENSBTAG00000001081;ENSBTAG00000002082;ENSBTAG00000002633;ENSBTAG00000003191;ENSBTAG00000004553;ENSBTAG00000004896;ENSBTAG00000005984;ENSBTAG00000007079;ENSBTAG00000009578;ENSBTAG00000010402;ENSBTAG00000010677;ENSBTAG00000011190;ENSBTAG00000011473;ENSBTAG00000012342;ENSBTAG00000012818;ENSBTAG00000013744;ENSBTAG00000017970;ENSBTAG00000018225;ENSBTAG00000018725;ENSBTAG00000021372;ENSBTAG00000032427;…
Cellular Component	GO:0005901	caveola	23	61	0.0086038	0.0428285	ENSBTAG00000000231;ENSBTAG00000000717;ENSBTAG00000000736;ENSBTAG00000006420;ENSBTAG00000007993;ENSBTAG00000008938;ENSBTAG00000009903;ENSBTAG00000010073;ENSBTAG00000010526;ENSBTAG00000013244;ENSBTAG00000013287;ENSBTAG00000014182;ENSBTAG00000014269;ENSBTAG00000015991;ENSBTAG00000016156;ENSBTAG00000016420;ENSBTAG00000017869;ENSBTAG00000019290;ENSBTAG00000019832;ENSBTAG00000021191;ENSBTAG00000039684;…
Cellular Component	GO:0030684	preribosome	23	63	0.0132034	0.058207	ENSBTAG00000000683;ENSBTAG00000001504;ENSBTAG00000001666;ENSBTAG00000002210;ENSBTAG00000002306;ENSBTAG00000002716;ENSBTAG00000003225;ENSBTAG00000003323;ENSBTAG00000004225;ENSBTAG00000007728;ENSBTAG00000008118;ENSBTAG00000010042;ENSBTAG00000010426;ENSBTAG00000012878;ENSBTAG00000015424;ENSBTAG00000015612;ENSBTAG00000016510;ENSBTAG00000016824;ENSBTAG00000017019;ENSBTAG00000017418;ENSBTAG00000020886;…
Cellular Component	GO:0030864	cortical actin cytoskeleton	23	63	0.0132034	0.058207	ENSBTAG00000002996;ENSBTAG00000004635;ENSBTAG00000004643;ENSBTAG00000006071;ENSBTAG00000006323;ENSBTAG00000006995;ENSBTAG00000009617;ENSBTAG00000010073;ENSBTAG00000010402;ENSBTAG00000010981;ENSBTAG00000012575;ENSBTAG00000013153;ENSBTAG00000013607;ENSBTAG00000013953;ENSBTAG00000015991;ENSBTAG00000017547;ENSBTAG00000018152;ENSBTAG00000019633;ENSBTAG00000021190;ENSBTAG00000024426;ENSBTAG00000032521;…
Cellular Component	GO:0032592	integral component of mitochondrial membrane	23	68	0.0333355	0.123543	ENSBTAG00000000428;ENSBTAG00000001475;ENSBTAG00000001781;ENSBTAG00000003307;ENSBTAG00000003876;ENSBTAG00000005807;ENSBTAG00000006084;ENSBTAG00000007900;ENSBTAG00000009006;ENSBTAG00000010001;ENSBTAG00000010566;ENSBTAG00000011250;ENSBTAG00000012041;ENSBTAG00000013413;ENSBTAG00000014536;ENSBTAG00000017053;ENSBTAG00000019911;ENSBTAG00000020850;ENSBTAG00000021780;ENSBTAG00000024723;ENSBTAG00000032829;…
Cellular Component	GO:0043596	nuclear replication fork	22	37	2.79911e-06	2.95e-05	ENSBTAG00000000252;ENSBTAG00000000590;ENSBTAG00000000629;ENSBTAG00000003843;ENSBTAG00000005197;ENSBTAG00000006065;ENSBTAG00000006225;ENSBTAG00000007234;ENSBTAG00000007749;ENSBTAG00000007937;ENSBTAG00000008170;ENSBTAG00000009711;ENSBTAG00000011455;ENSBTAG00000011727;ENSBTAG00000011997;ENSBTAG00000013168;ENSBTAG00000014366;ENSBTAG00000016406;ENSBTAG00000016869;ENSBTAG00000017061;ENSBTAG00000019120;…
Cellular Component	GO:0005902	microvillus	22	58	0.0092894	0.0455687	ENSBTAG00000000897;ENSBTAG00000001332;ENSBTAG00000002703;ENSBTAG00000003191;ENSBTAG00000003418;ENSBTAG00000004672;ENSBTAG00000006578;ENSBTAG00000006731;ENSBTAG00000007173;ENSBTAG00000007415;ENSBTAG00000009470;ENSBTAG00000010347;ENSBTAG00000010620;ENSBTAG00000011088;ENSBTAG00000011256;ENSBTAG00000011382;ENSBTAG00000011578;ENSBTAG00000013153;ENSBTAG00000014238;ENSBTAG00000014923;ENSBTAG00000015527;…
Cellular Component	GO:0031970	organelle envelope lumen	22	58	0.0092894	0.0455687	ENSBTAG00000001107;ENSBTAG00000001632;ENSBTAG00000002402;ENSBTAG00000003307;ENSBTAG00000004402;ENSBTAG00000004844;ENSBTAG00000005009;ENSBTAG00000005293;ENSBTAG00000005807;ENSBTAG00000006084;ENSBTAG00000006838;ENSBTAG00000011454;ENSBTAG00000013025;ENSBTAG00000014904;ENSBTAG00000015529;ENSBTAG00000015943;ENSBTAG00000017605;ENSBTAG00000017753;ENSBTAG00000019514;ENSBTAG00000021976;ENSBTAG00000022598;…
Cellular Component	GO:0070062	extracellular exosome	22	59	0.0116021	0.0553049	ENSBTAG00000005726;ENSBTAG00000006189;ENSBTAG00000007399;ENSBTAG00000008300;ENSBTAG00000008913;ENSBTAG00000010390;ENSBTAG00000010663;ENSBTAG00000012927;ENSBTAG00000013011;ENSBTAG00000013468;ENSBTAG00000013533;ENSBTAG00000013563;ENSBTAG00000015683;ENSBTAG00000018972;ENSBTAG00000019552;ENSBTAG00000027924;ENSBTAG00000032719;ENSBTAG00000039509;ENSBTAG00000046339;ENSBTAG00000047495;ENSBTAG00000047956;…
Cellular Component	GO:0065010	extracellular membrane-bounded organelle	22	62	0.0213871	0.0842103	ENSBTAG00000005726;ENSBTAG00000006189;ENSBTAG00000007399;ENSBTAG00000008300;ENSBTAG00000008913;ENSBTAG00000010390;ENSBTAG00000010663;ENSBTAG00000012927;ENSBTAG00000013011;ENSBTAG00000013468;ENSBTAG00000013533;ENSBTAG00000013563;ENSBTAG00000015683;ENSBTAG00000018972;ENSBTAG00000019552;ENSBTAG00000027924;ENSBTAG00000032719;ENSBTAG00000039509;ENSBTAG00000046339;ENSBTAG00000047495;ENSBTAG00000047956;…
Cellular Component	GO:0031228	intrinsic component of Golgi membrane	21	43	0.000239134	0.00184338	ENSBTAG00000001744;ENSBTAG00000002768;ENSBTAG00000002939;ENSBTAG00000003052;ENSBTAG00000006177;ENSBTAG00000006768;ENSBTAG00000008076;ENSBTAG00000009307;ENSBTAG00000010659;ENSBTAG00000011129;ENSBTAG00000011748;ENSBTAG00000013322;ENSBTAG00000013330;ENSBTAG00000015354;ENSBTAG00000015955;ENSBTAG00000017218;ENSBTAG00000027626;ENSBTAG00000027711;ENSBTAG00000030584;ENSBTAG00000040361;ENSBTAG00000048965
Cellular Component	GO:0005905	coated pit	21	47	0.00106219	0.0067272	ENSBTAG00000001657;ENSBTAG00000005542;ENSBTAG00000006420;ENSBTAG00000009915;ENSBTAG00000009990;ENSBTAG00000010740;ENSBTAG00000011683;ENSBTAG00000012299;ENSBTAG00000012314;ENSBTAG00000013869;ENSBTAG00000016708;ENSBTAG00000017753;ENSBTAG00000018517;ENSBTAG00000019062;ENSBTAG00000020237;ENSBTAG00000020616;ENSBTAG00000021801;ENSBTAG00000021997;ENSBTAG00000022044;ENSBTAG00000032719;ENSBTAG00000053703
Cellular Component	GO:0032838	cell projection cytoplasm	20	39	0.000143335	0.00116481	ENSBTAG00000002280;ENSBTAG00000002432;ENSBTAG00000006574;ENSBTAG00000007617;ENSBTAG00000008881;ENSBTAG00000010073;ENSBTAG00000010739;ENSBTAG00000011994;ENSBTAG00000012041;ENSBTAG00000012902;ENSBTAG00000014933;ENSBTAG00000015376;ENSBTAG00000016076;ENSBTAG00000016328;ENSBTAG00000016598;ENSBTAG00000016806;ENSBTAG00000020935;ENSBTAG00000021883;ENSBTAG00000030453;ENSBTAG00000037996
Cellular Component	GO:0000307	cyclin-dependent protein kinase holoenzyme complex	20	40	0.000223884	0.00174578	ENSBTAG00000000599;ENSBTAG00000001528;ENSBTAG00000004021;ENSBTAG00000004695;ENSBTAG00000004906;ENSBTAG00000005269;ENSBTAG00000005492;ENSBTAG00000005792;ENSBTAG00000005861;ENSBTAG00000006065;ENSBTAG00000006640;ENSBTAG00000008136;ENSBTAG00000008353;ENSBTAG00000010109;ENSBTAG00000014158;ENSBTAG00000017514;ENSBTAG00000018636;ENSBTAG00000033685;ENSBTAG00000046286;ENSBTAG00000048664
Cellular Component	GO:0001725	stress fiber	20	48	0.00380263	0.0203561	ENSBTAG00000001081;ENSBTAG00000002633;ENSBTAG00000003191;ENSBTAG00000004553;ENSBTAG00000004896;ENSBTAG00000005984;ENSBTAG00000007079;ENSBTAG00000009578;ENSBTAG00000010402;ENSBTAG00000010677;ENSBTAG00000011473;ENSBTAG00000012342;ENSBTAG00000012818;ENSBTAG00000013744;ENSBTAG00000017970;ENSBTAG00000018225;ENSBTAG00000018725;ENSBTAG00000021372;ENSBTAG00000032427;ENSBTAG00000033217
Cellular Component	GO:0097517	contractile actin filament bundle	20	48	0.00380263	0.0203561	ENSBTAG00000001081;ENSBTAG00000002633;ENSBTAG00000003191;ENSBTAG00000004553;ENSBTAG00000004896;ENSBTAG00000005984;ENSBTAG00000007079;ENSBTAG00000009578;ENSBTAG00000010402;ENSBTAG00000010677;ENSBTAG00000011473;ENSBTAG00000012342;ENSBTAG00000012818;ENSBTAG00000013744;ENSBTAG00000017970;ENSBTAG00000018225;ENSBTAG00000018725;ENSBTAG00000021372;ENSBTAG00000032427;ENSBTAG00000033217
Cellular Component	GO:0000790	nuclear chromatin	20	50	0.00657093	0.0337041	ENSBTAG00000000023;ENSBTAG00000000039;ENSBTAG00000001161;ENSBTAG00000005578;ENSBTAG00000007323;ENSBTAG00000009330;ENSBTAG00000009985;ENSBTAG00000010380;ENSBTAG00000011849;ENSBTAG00000012698;ENSBTAG00000013271;ENSBTAG00000013620;ENSBTAG00000015976;ENSBTAG00000016730;ENSBTAG00000018752;ENSBTAG00000019281;ENSBTAG00000019757;ENSBTAG00000020423;ENSBTAG00000020819;ENSBTAG00000023417
Cellular Component	GO:0016592	mediator complex	19	41	0.00106013	0.0067272	ENSBTAG00000000382;ENSBTAG00000001888;ENSBTAG00000002389;ENSBTAG00000003552;ENSBTAG00000007288;ENSBTAG00000007802;ENSBTAG00000011721;ENSBTAG00000011790;ENSBTAG00000012418;ENSBTAG00000013236;ENSBTAG00000015744;ENSBTAG00000016737;ENSBTAG00000016899;ENSBTAG00000019441;ENSBTAG00000021351;ENSBTAG00000021468;ENSBTAG00000024095;ENSBTAG00000047217;ENSBTAG00000054943
Cellular Component	GO:0030173	integral component of Golgi membrane	19	41	0.00106013	0.0067272	ENSBTAG00000001744;ENSBTAG00000002768;ENSBTAG00000002939;ENSBTAG00000003052;ENSBTAG00000006177;ENSBTAG00000006768;ENSBTAG00000008076;ENSBTAG00000009307;ENSBTAG00000010659;ENSBTAG00000011129;ENSBTAG00000011748;ENSBTAG00000013322;ENSBTAG00000013330;ENSBTAG00000015955;ENSBTAG00000017218;ENSBTAG00000027711;ENSBTAG00000030584;ENSBTAG00000040361;ENSBTAG00000048965
Cellular Component	GO:0030660	Golgi-associated vesicle membrane	18	34	0.000181885	0.00146049	ENSBTAG00000000807;ENSBTAG00000002769;ENSBTAG00000003109;ENSBTAG00000004333;ENSBTAG00000004463;ENSBTAG00000005384;ENSBTAG00000005809;ENSBTAG00000006556;ENSBTAG00000006690;ENSBTAG00000007933;ENSBTAG00000009237;ENSBTAG00000010292;ENSBTAG00000010740;ENSBTAG00000011831;ENSBTAG00000013212;ENSBTAG00000014843;ENSBTAG00000016708;ENSBTAG00000021756
Cellular Component	GO:0005801	cis-Golgi network	18	37	0.00069835	0.00475795	ENSBTAG00000000073;ENSBTAG00000001977;ENSBTAG00000002033;ENSBTAG00000002422;ENSBTAG00000003232;ENSBTAG00000004463;ENSBTAG00000004961;ENSBTAG00000005732;ENSBTAG00000006014;ENSBTAG00000008862;ENSBTAG00000010989;ENSBTAG00000011317;ENSBTAG00000016950;ENSBTAG00000017291;ENSBTAG00000017907;ENSBTAG00000020180;ENSBTAG00000025029;ENSBTAG00000034522
Cellular Component	GO:0030118	clathrin coat	18	37	0.00069835	0.00475795	ENSBTAG00000001189;ENSBTAG00000001657;ENSBTAG00000002769;ENSBTAG00000002881;ENSBTAG00000005016;ENSBTAG00000005542;ENSBTAG00000009915;ENSBTAG00000009990;ENSBTAG00000010292;ENSBTAG00000010740;ENSBTAG00000013282;ENSBTAG00000013329;ENSBTAG00000016708;ENSBTAG00000017771;ENSBTAG00000020237;ENSBTAG00000020316;ENSBTAG00000021883;ENSBTAG00000046996
Cellular Component	GO:0055038	recycling endosome membrane	18	37	0.00069835	0.00475795	ENSBTAG00000000711;ENSBTAG00000001662;ENSBTAG00000004131;ENSBTAG00000005844;ENSBTAG00000006792;ENSBTAG00000007962;ENSBTAG00000011292;ENSBTAG00000012094;ENSBTAG00000018564;ENSBTAG00000019290;ENSBTAG00000019526;ENSBTAG00000020412;ENSBTAG00000021191;ENSBTAG00000037703;ENSBTAG00000038696;ENSBTAG00000050712;ENSBTAG00000053390;ENSBTAG00000055257
Cellular Component	GO:0042470	melanosome	18	42	0.00412502	0.0217369	ENSBTAG00000000778;ENSBTAG00000001928;ENSBTAG00000005432;ENSBTAG00000006045;ENSBTAG00000006270;ENSBTAG00000009784;ENSBTAG00000010242;ENSBTAG00000011931;ENSBTAG00000012408;ENSBTAG00000014809;ENSBTAG00000015910;ENSBTAG00000016481;ENSBTAG00000016720;ENSBTAG00000017038;ENSBTAG00000017143;ENSBTAG00000017196;ENSBTAG00000032719;ENSBTAG00000043958
Cellular Component	GO:0048770	pigment granule	18	42	0.00412502	0.0217369	ENSBTAG00000000778;ENSBTAG00000001928;ENSBTAG00000005432;ENSBTAG00000006045;ENSBTAG00000006270;ENSBTAG00000009784;ENSBTAG00000010242;ENSBTAG00000011931;ENSBTAG00000012408;ENSBTAG00000014809;ENSBTAG00000015910;ENSBTAG00000016481;ENSBTAG00000016720;ENSBTAG00000017038;ENSBTAG00000017143;ENSBTAG00000017196;ENSBTAG00000032719;ENSBTAG00000043958
Cellular Component	GO:0032153	cell division site	18	44	0.0073896	0.0371962	ENSBTAG00000001182;ENSBTAG00000002095;ENSBTAG00000002633;ENSBTAG00000006395;ENSBTAG00000008758;ENSBTAG00000009600;ENSBTAG00000010402;ENSBTAG00000011198;ENSBTAG00000012342;ENSBTAG00000012575;ENSBTAG00000012784;ENSBTAG00000013153;ENSBTAG00000014299;ENSBTAG00000014479;ENSBTAG00000017037;ENSBTAG00000017271;ENSBTAG00000027444;ENSBTAG00000044184
Cellular Component	GO:0005844	polysome	18	46	0.0124736	0.057177	ENSBTAG00000000288;ENSBTAG00000001016;ENSBTAG00000002060;ENSBTAG00000003915;ENSBTAG00000004315;ENSBTAG00000004406;ENSBTAG00000005462;ENSBTAG00000005620;ENSBTAG00000010012;ENSBTAG00000012253;ENSBTAG00000012552;ENSBTAG00000012998;ENSBTAG00000015388;ENSBTAG00000016457;ENSBTAG00000017164;ENSBTAG00000018463;ENSBTAG00000031723;ENSBTAG00000038896
Cellular Component	GO:0031985	Golgi cisterna	18	46	0.0124736	0.057177	ENSBTAG00000001977;ENSBTAG00000005614;ENSBTAG00000005809;ENSBTAG00000007357;ENSBTAG00000008863;ENSBTAG00000011317;ENSBTAG00000011748;ENSBTAG00000011879;ENSBTAG00000012626;ENSBTAG00000015249;ENSBTAG00000019819;ENSBTAG00000020539;ENSBTAG00000025029;ENSBTAG00000025606;ENSBTAG00000032848;ENSBTAG00000034522;ENSBTAG00000044063;ENSBTAG00000046129
Cellular Component	GO:0005758	mitochondrial intermembrane space	18	48	0.0199763	0.0804418	ENSBTAG00000001632;ENSBTAG00000003307;ENSBTAG00000004402;ENSBTAG00000004844;ENSBTAG00000005009;ENSBTAG00000005293;ENSBTAG00000005807;ENSBTAG00000006084;ENSBTAG00000006838;ENSBTAG00000011454;ENSBTAG00000013025;ENSBTAG00000014904;ENSBTAG00000015529;ENSBTAG00000015943;ENSBTAG00000017605;ENSBTAG00000019514;ENSBTAG00000021976;ENSBTAG00000024701
Cellular Component	GO:0036452	ESCRT complex	17	25	2.78101e-06	2.95e-05	ENSBTAG00000000320;ENSBTAG00000000411;ENSBTAG00000002658;ENSBTAG00000004307;ENSBTAG00000004792;ENSBTAG00000007939;ENSBTAG00000010355;ENSBTAG00000013387;ENSBTAG00000013528;ENSBTAG00000013563;ENSBTAG00000013589;ENSBTAG00000018803;ENSBTAG00000019906;ENSBTAG00000026320;ENSBTAG00000033331;ENSBTAG00000048809;ENSBTAG00000050426
Cellular Component	GO:0005791	rough endoplasmic reticulum	17	38	0.00305802	0.0165673	ENSBTAG00000000073;ENSBTAG00000001601;ENSBTAG00000002988;ENSBTAG00000006614;ENSBTAG00000008109;ENSBTAG00000008840;ENSBTAG00000010169;ENSBTAG00000011757;ENSBTAG00000011834;ENSBTAG00000014105;ENSBTAG00000015388;ENSBTAG00000016764;ENSBTAG00000031723;ENSBTAG00000038896;ENSBTAG00000044075;ENSBTAG00000049516;ENSBTAG00000050243
Cellular Component	GO:0032155	cell division site part	17	41	0.00779071	0.0389247	ENSBTAG00000001182;ENSBTAG00000002095;ENSBTAG00000006395;ENSBTAG00000008758;ENSBTAG00000009600;ENSBTAG00000010402;ENSBTAG00000011198;ENSBTAG00000012342;ENSBTAG00000012575;ENSBTAG00000012784;ENSBTAG00000013153;ENSBTAG00000014299;ENSBTAG00000014479;ENSBTAG00000017037;ENSBTAG00000017271;ENSBTAG00000027444;ENSBTAG00000044184
Cellular Component	GO:0097526	spliceosomal tri-snRNP complex	17	41	0.00779071	0.0389247	ENSBTAG00000003094;ENSBTAG00000004571;ENSBTAG00000005441;ENSBTAG00000005634;ENSBTAG00000006104;ENSBTAG00000006353;ENSBTAG00000007363;ENSBTAG00000008578;ENSBTAG00000010691;ENSBTAG00000011488;ENSBTAG00000011656;ENSBTAG00000012177;ENSBTAG00000013526;ENSBTAG00000013946;ENSBTAG00000021810;ENSBTAG00000050130;ENSBTAG00000053210
Cellular Component	GO:0000407	pre-autophagosomal structure	16	25	1.77371e-05	0.000171359	ENSBTAG00000000510;ENSBTAG00000000878;ENSBTAG00000001632;ENSBTAG00000003695;ENSBTAG00000005400;ENSBTAG00000007058;ENSBTAG00000007696;ENSBTAG00000010193;ENSBTAG00000011041;ENSBTAG00000011623;ENSBTAG00000012049;ENSBTAG00000012833;ENSBTAG00000012987;ENSBTAG00000015591;ENSBTAG00000017525;ENSBTAG00000026290
Cellular Component	GO:0046540	U4/U6 x U5 tri-snRNP complex	16	33	0.00143509	0.00883987	ENSBTAG00000003094;ENSBTAG00000004571;ENSBTAG00000005441;ENSBTAG00000005634;ENSBTAG00000006104;ENSBTAG00000006353;ENSBTAG00000007363;ENSBTAG00000008578;ENSBTAG00000010691;ENSBTAG00000011488;ENSBTAG00000011656;ENSBTAG00000012177;ENSBTAG00000013526;ENSBTAG00000013946;ENSBTAG00000021810;ENSBTAG00000050130
Cellular Component	GO:0015030	Cajal body	16	34	0.00212694	0.0122095	ENSBTAG00000001071;ENSBTAG00000002650;ENSBTAG00000003094;ENSBTAG00000003702;ENSBTAG00000004571;ENSBTAG00000007435;ENSBTAG00000008461;ENSBTAG00000010766;ENSBTAG00000011243;ENSBTAG00000011586;ENSBTAG00000012683;ENSBTAG00000013045;ENSBTAG00000013526;ENSBTAG00000013946;ENSBTAG00000018501;ENSBTAG00000031846
Cellular Component	GO:1904115	axon cytoplasm	15	25	9.62086e-05	0.000801145	ENSBTAG00000006574;ENSBTAG00000007617;ENSBTAG00000010739;ENSBTAG00000011994;ENSBTAG00000012041;ENSBTAG00000012902;ENSBTAG00000014933;ENSBTAG00000015376;ENSBTAG00000016076;ENSBTAG00000016598;ENSBTAG00000016806;ENSBTAG00000020935;ENSBTAG00000021883;ENSBTAG00000030453;ENSBTAG00000037996
Cellular Component	GO:0000803	sex chromosome	15	27	0.00031435	0.00232999	ENSBTAG00000000023;ENSBTAG00000003354;ENSBTAG00000004021;ENSBTAG00000004964;ENSBTAG00000006551;ENSBTAG00000009330;ENSBTAG00000009988;ENSBTAG00000010982;ENSBTAG00000012659;ENSBTAG00000014017;ENSBTAG00000016105;ENSBTAG00000018752;ENSBTAG00000021143;ENSBTAG00000031567;ENSBTAG00000045779
Cellular Component	GO:0080008	Cul4-RING E3 ubiquitin ligase complex	15	31	0.00206169	0.0120399	ENSBTAG00000002236;ENSBTAG00000003500;ENSBTAG00000005796;ENSBTAG00000006708;ENSBTAG00000008841;ENSBTAG00000010515;ENSBTAG00000018142;ENSBTAG00000018254;ENSBTAG00000018569;ENSBTAG00000020969;ENSBTAG00000021392;ENSBTAG00000021569;ENSBTAG00000021573;ENSBTAG00000048519;ENSBTAG00000053588
Cellular Component	GO:0005637	nuclear inner membrane	15	37	0.0152248	0.0649945	ENSBTAG00000001435;ENSBTAG00000002835;ENSBTAG00000003693;ENSBTAG00000005785;ENSBTAG00000007360;ENSBTAG00000008453;ENSBTAG00000011147;ENSBTAG00000013621;ENSBTAG00000014023;ENSBTAG00000014877;ENSBTAG00000015258;ENSBTAG00000015538;ENSBTAG00000015804;ENSBTAG00000020455;ENSBTAG00000022314
Cellular Component	GO:0000152	nuclear ubiquitin ligase complex	15	39	0.0254048	0.0996253	ENSBTAG00000000023;ENSBTAG00000000162;ENSBTAG00000001937;ENSBTAG00000002726;ENSBTAG00000004603;ENSBTAG00000008759;ENSBTAG00000009879;ENSBTAG00000014430;ENSBTAG00000016675;ENSBTAG00000016746;ENSBTAG00000018205;ENSBTAG00000022520;ENSBTAG00000031387;ENSBTAG00000038306;ENSBTAG00000046223
Cellular Component	GO:0016328	lateral plasma membrane	15	42	0.0490773	0.168168	ENSBTAG00000001246;ENSBTAG00000001332;ENSBTAG00000003075;ENSBTAG00000005711;ENSBTAG00000006882;ENSBTAG00000007825;ENSBTAG00000007993;ENSBTAG00000010620;ENSBTAG00000010696;ENSBTAG00000015107;ENSBTAG00000015991;ENSBTAG00000016420;ENSBTAG00000016577;ENSBTAG00000017461;ENSBTAG00000018852
Cellular Component	GO:0044232	organelle membrane contact site	14	23	0.000133055	0.00108782	ENSBTAG00000000562;ENSBTAG00000001607;ENSBTAG00000001781;ENSBTAG00000005400;ENSBTAG00000008016;ENSBTAG00000009784;ENSBTAG00000011041;ENSBTAG00000011401;ENSBTAG00000015908;ENSBTAG00000017129;ENSBTAG00000018893;ENSBTAG00000020547;ENSBTAG00000046391;ENSBTAG00000048107
Cellular Component	GO:0071007	U2-type catalytic step 2 spliceosome	14	24	0.000250556	0.00189888	ENSBTAG00000007234;ENSBTAG00000007913;ENSBTAG00000008136;ENSBTAG00000008339;ENSBTAG00000008472;ENSBTAG00000011360;ENSBTAG00000011488;ENSBTAG00000012177;ENSBTAG00000012683;ENSBTAG00000013526;ENSBTAG00000013593;ENSBTAG00000014366;ENSBTAG00000027506;ENSBTAG00000030366
Cellular Component	GO:0000421	autophagosome membrane	14	25	0.000446998	0.00321807	ENSBTAG00000000878;ENSBTAG00000002296;ENSBTAG00000003928;ENSBTAG00000006550;ENSBTAG00000006768;ENSBTAG00000007399;ENSBTAG00000008016;ENSBTAG00000010242;ENSBTAG00000011491;ENSBTAG00000012987;ENSBTAG00000014883;ENSBTAG00000016355;ENSBTAG00000017801;ENSBTAG00000034796
Cellular Component	GO:0000791	euchromatin	14	28	0.00195128	0.0114946	ENSBTAG00000000023;ENSBTAG00000002224;ENSBTAG00000003021;ENSBTAG00000004037;ENSBTAG00000005474;ENSBTAG00000008695;ENSBTAG00000014023;ENSBTAG00000016420;ENSBTAG00000019193;ENSBTAG00000021143;ENSBTAG00000023417;ENSBTAG00000038306;ENSBTAG00000046765;ENSBTAG00000049437
Cellular Component	GO:0097431	mitotic spindle pole	14	30	0.00437739	0.022888	ENSBTAG00000000660;ENSBTAG00000001463;ENSBTAG00000001717;ENSBTAG00000005792;ENSBTAG00000006532;ENSBTAG00000009121;ENSBTAG00000010934;ENSBTAG00000013009;ENSBTAG00000013905;ENSBTAG00000015034;ENSBTAG00000017124;ENSBTAG00000017761;ENSBTAG00000020281;ENSBTAG00000020751
Cellular Component	GO:0051233	spindle midzone	14	32	0.00880081	0.0436481	ENSBTAG00000001700;ENSBTAG00000001717;ENSBTAG00000006071;ENSBTAG00000006574;ENSBTAG00000008088;ENSBTAG00000008579;ENSBTAG00000010384;ENSBTAG00000012784;ENSBTAG00000012902;ENSBTAG00000013773;ENSBTAG00000014326;ENSBTAG00000017753;ENSBTAG00000018643;ENSBTAG00000019552
Cellular Component	GO:0099738	cell cortex region	14	33	0.0120478	0.0568312	ENSBTAG00000003397;ENSBTAG00000006667;ENSBTAG00000008480;ENSBTAG00000011397;ENSBTAG00000013411;ENSBTAG00000013658;ENSBTAG00000016197;ENSBTAG00000016420;ENSBTAG00000017124;ENSBTAG00000018784;ENSBTAG00000019781;ENSBTAG00000020031;ENSBTAG00000021067;ENSBTAG00000047807
Cellular Component	GO:0033176	proton-transporting V-type ATPase complex	14	34	0.0161524	0.068306	ENSBTAG00000000203;ENSBTAG00000002703;ENSBTAG00000003450;ENSBTAG00000007272;ENSBTAG00000007572;ENSBTAG00000010620;ENSBTAG00000012117;ENSBTAG00000013513;ENSBTAG00000014553;ENSBTAG00000015100;ENSBTAG00000016309;ENSBTAG00000018646;ENSBTAG00000018889;ENSBTAG00000019218
Cellular Component	GO:0031463	Cul3-RING ubiquitin ligase complex	14	36	0.0274491	0.106537	ENSBTAG00000000501;ENSBTAG00000002697;ENSBTAG00000002796;ENSBTAG00000005824;ENSBTAG00000006708;ENSBTAG00000008115;ENSBTAG00000008350;ENSBTAG00000009428;ENSBTAG00000009726;ENSBTAG00000010378;ENSBTAG00000011292;ENSBTAG00000021769;ENSBTAG00000026369;ENSBTAG00000046493
Cellular Component	GO:0005671	Ada2/Gcn5/Ada3 transcription activator complex	13	16	1.69391e-06	1.87302e-05	ENSBTAG00000000252;ENSBTAG00000000746;ENSBTAG00000002625;ENSBTAG00000004271;ENSBTAG00000007961;ENSBTAG00000008737;ENSBTAG00000011904;ENSBTAG00000014451;ENSBTAG00000014677;ENSBTAG00000017419;ENSBTAG00000018978;ENSBTAG00000044019;ENSBTAG00000047031
Cellular Component	GO:0044233	ER-mitochondrion membrane contact site	13	17	5.6438e-06	5.76779e-05	ENSBTAG00000000562;ENSBTAG00000001607;ENSBTAG00000001781;ENSBTAG00000005400;ENSBTAG00000008016;ENSBTAG00000009784;ENSBTAG00000011041;ENSBTAG00000011401;ENSBTAG00000015908;ENSBTAG00000017129;ENSBTAG00000018893;ENSBTAG00000020547;ENSBTAG00000048107
Cellular Component	GO:0012507	ER to Golgi transport vesicle membrane	13	20	8.87965e-05	0.000758142	ENSBTAG00000002791;ENSBTAG00000003619;ENSBTAG00000003708;ENSBTAG00000007712;ENSBTAG00000009726;ENSBTAG00000010378;ENSBTAG00000015782;ENSBTAG00000015958;ENSBTAG00000017825;ENSBTAG00000018295;ENSBTAG00000018322;ENSBTAG00000023933;ENSBTAG00000046493
Cellular Component	GO:0090544	BAF-type complex	13	22	0.000351576	0.00257759	ENSBTAG00000001024;ENSBTAG00000003077;ENSBTAG00000003929;ENSBTAG00000006971;ENSBTAG00000007494;ENSBTAG00000009988;ENSBTAG00000011531;ENSBTAG00000014697;ENSBTAG00000014814;ENSBTAG00000015308;ENSBTAG00000019220;ENSBTAG00000021062;ENSBTAG00000031567
Cellular Component	GO:0043601	nuclear replisome	13	25	0.00178818	0.0107212	ENSBTAG00000000252;ENSBTAG00000000590;ENSBTAG00000003843;ENSBTAG00000006225;ENSBTAG00000007234;ENSBTAG00000007749;ENSBTAG00000007937;ENSBTAG00000008170;ENSBTAG00000009711;ENSBTAG00000011455;ENSBTAG00000013168;ENSBTAG00000014366;ENSBTAG00000016869
Cellular Component	GO:0030894	replisome	13	26	0.00281578	0.0156317	ENSBTAG00000000252;ENSBTAG00000000590;ENSBTAG00000003843;ENSBTAG00000006225;ENSBTAG00000007234;ENSBTAG00000007749;ENSBTAG00000007937;ENSBTAG00000008170;ENSBTAG00000009711;ENSBTAG00000011455;ENSBTAG00000013168;ENSBTAG00000014366;ENSBTAG00000016869
Cellular Component	GO:0016235	aggresome	13	28	0.00629439	0.0324089	ENSBTAG00000003075;ENSBTAG00000005542;ENSBTAG00000010180;ENSBTAG00000010664;ENSBTAG00000011757;ENSBTAG00000012481;ENSBTAG00000012904;ENSBTAG00000013244;ENSBTAG00000015591;ENSBTAG00000019298;ENSBTAG00000021677;ENSBTAG00000021756;ENSBTAG00000024708
Cellular Component	GO:0008180	COP9 signalosome	13	30	0.0125313	0.057177	ENSBTAG00000002784;ENSBTAG00000004736;ENSBTAG00000005854;ENSBTAG00000006950;ENSBTAG00000007662;ENSBTAG00000010402;ENSBTAG00000010910;ENSBTAG00000011111;ENSBTAG00000013425;ENSBTAG00000016221;ENSBTAG00000017584;ENSBTAG00000018973;ENSBTAG00000019317
Cellular Component	GO:0030665	clathrin-coated vesicle membrane	13	30	0.0125313	0.057177	ENSBTAG00000001657;ENSBTAG00000002769;ENSBTAG00000005016;ENSBTAG00000009915;ENSBTAG00000010292;ENSBTAG00000010740;ENSBTAG00000013282;ENSBTAG00000013329;ENSBTAG00000016708;ENSBTAG00000017547;ENSBTAG00000017771;ENSBTAG00000020237;ENSBTAG00000046996
Cellular Component	GO:0032154	cleavage furrow	13	33	0.0295948	0.111254	ENSBTAG00000001182;ENSBTAG00000002095;ENSBTAG00000008758;ENSBTAG00000009600;ENSBTAG00000010402;ENSBTAG00000011198;ENSBTAG00000012342;ENSBTAG00000012784;ENSBTAG00000013153;ENSBTAG00000014299;ENSBTAG00000017037;ENSBTAG00000017271;ENSBTAG00000027444
Cellular Component	GO:0097610	cell surface furrow	13	33	0.0295948	0.111254	ENSBTAG00000001182;ENSBTAG00000002095;ENSBTAG00000008758;ENSBTAG00000009600;ENSBTAG00000010402;ENSBTAG00000011198;ENSBTAG00000012342;ENSBTAG00000012784;ENSBTAG00000013153;ENSBTAG00000014299;ENSBTAG00000017037;ENSBTAG00000017271;ENSBTAG00000027444
Cellular Component	GO:0030904	retromer complex	12	18	0.000117131	0.000963475	ENSBTAG00000001352;ENSBTAG00000001942;ENSBTAG00000002014;ENSBTAG00000002493;ENSBTAG00000003097;ENSBTAG00000007871;ENSBTAG00000008417;ENSBTAG00000010193;ENSBTAG00000014838;ENSBTAG00000016882;ENSBTAG00000018801;ENSBTAG00000025358
Cellular Component	GO:0071782	endoplasmic reticulum tubular network	12	18	0.000117131	0.000963475	ENSBTAG00000000985;ENSBTAG00000003330;ENSBTAG00000006586;ENSBTAG00000011104;ENSBTAG00000012804;ENSBTAG00000013449;ENSBTAG00000015013;ENSBTAG00000018061;ENSBTAG00000018564;ENSBTAG00000022314;ENSBTAG00000026283;ENSBTAG00000026754
Cellular Component	GO:0098827	endoplasmic reticulum subcompartment	12	19	0.000250055	0.00189888	ENSBTAG00000000985;ENSBTAG00000003330;ENSBTAG00000006586;ENSBTAG00000011104;ENSBTAG00000012804;ENSBTAG00000013449;ENSBTAG00000015013;ENSBTAG00000018061;ENSBTAG00000018564;ENSBTAG00000022314;ENSBTAG00000026283;ENSBTAG00000026754
Cellular Component	GO:0005849	mRNA cleavage factor complex	12	21	0.000903795	0.00600601	ENSBTAG00000003547;ENSBTAG00000005326;ENSBTAG00000005987;ENSBTAG00000006099;ENSBTAG00000006639;ENSBTAG00000007323;ENSBTAG00000010207;ENSBTAG00000010227;ENSBTAG00000015263;ENSBTAG00000019735;ENSBTAG00000020653;ENSBTAG00000031917
Cellular Component	GO:1990752	microtubule end	12	26	0.00906742	0.0448057	ENSBTAG00000001774;ENSBTAG00000003908;ENSBTAG00000004448;ENSBTAG00000004887;ENSBTAG00000006008;ENSBTAG00000006532;ENSBTAG00000008088;ENSBTAG00000008153;ENSBTAG00000011875;ENSBTAG00000016779;ENSBTAG00000027444;ENSBTAG00000027453
Cellular Component	GO:0016514	SWI/SNF complex	11	17	0.000338196	0.00249304	ENSBTAG00000001024;ENSBTAG00000006971;ENSBTAG00000007494;ENSBTAG00000009988;ENSBTAG00000011531;ENSBTAG00000014697;ENSBTAG00000014814;ENSBTAG00000015308;ENSBTAG00000019220;ENSBTAG00000021062;ENSBTAG00000031567
Cellular Component	GO:0030137	COPI-coated vesicle	11	19	0.00128443	0.00805908	ENSBTAG00000000807;ENSBTAG00000004333;ENSBTAG00000004463;ENSBTAG00000005384;ENSBTAG00000006556;ENSBTAG00000006690;ENSBTAG00000007933;ENSBTAG00000009026;ENSBTAG00000009237;ENSBTAG00000013212;ENSBTAG00000014843
Cellular Component	GO:0002102	podosome	11	20	0.00225303	0.0128242	ENSBTAG00000003191;ENSBTAG00000003825;ENSBTAG00000004553;ENSBTAG00000006071;ENSBTAG00000007079;ENSBTAG00000008938;ENSBTAG00000009786;ENSBTAG00000017547;ENSBTAG00000021131;ENSBTAG00000021879;ENSBTAG00000027444
Cellular Component	GO:0044665	MLL1/2 complex	11	28	0.0445663	0.155751	ENSBTAG00000000023;ENSBTAG00000000131;ENSBTAG00000002210;ENSBTAG00000011904;ENSBTAG00000012564;ENSBTAG00000015946;ENSBTAG00000019281;ENSBTAG00000020422;ENSBTAG00000023417;ENSBTAG00000047031;ENSBTAG00000047991
Cellular Component	GO:0071339	MLL1 complex	11	28	0.0445663	0.155751	ENSBTAG00000000023;ENSBTAG00000000131;ENSBTAG00000002210;ENSBTAG00000011904;ENSBTAG00000012564;ENSBTAG00000015946;ENSBTAG00000019281;ENSBTAG00000020422;ENSBTAG00000023417;ENSBTAG00000047031;ENSBTAG00000047991
Cellular Component	GO:0030663	COPI-coated vesicle membrane	10	15	0.000450864	0.00321807	ENSBTAG00000000807;ENSBTAG00000004333;ENSBTAG00000004463;ENSBTAG00000005384;ENSBTAG00000006556;ENSBTAG00000006690;ENSBTAG00000007933;ENSBTAG00000009237;ENSBTAG00000013212;ENSBTAG00000014843
Cellular Component	GO:0032039	integrator complex	10	15	0.000450864	0.00321807	ENSBTAG00000000579;ENSBTAG00000000642;ENSBTAG00000002970;ENSBTAG00000006235;ENSBTAG00000007620;ENSBTAG00000010455;ENSBTAG00000010505;ENSBTAG00000012070;ENSBTAG00000013515;ENSBTAG00000018548
Cellular Component	GO:0090568	nuclear transcriptional repressor complex	10	16	0.000949802	0.00618977	ENSBTAG00000002820;ENSBTAG00000003034;ENSBTAG00000006678;ENSBTAG00000008737;ENSBTAG00000011849;ENSBTAG00000012698;ENSBTAG00000018717;ENSBTAG00000020117;ENSBTAG00000038409;ENSBTAG00000047606
Cellular Component	GO:0000159	protein phosphatase type 2A complex	10	17	0.00182353	0.0108367	ENSBTAG00000000469;ENSBTAG00000000754;ENSBTAG00000001933;ENSBTAG00000005533;ENSBTAG00000009245;ENSBTAG00000018317;ENSBTAG00000019851;ENSBTAG00000020192;ENSBTAG00000020277;ENSBTAG00000023416
Cellular Component	GO:0005847	mRNA cleavage and polyadenylation specificity factor complex	10	17	0.00182353	0.0108367	ENSBTAG00000003547;ENSBTAG00000005326;ENSBTAG00000005987;ENSBTAG00000006099;ENSBTAG00000007323;ENSBTAG00000010207;ENSBTAG00000010227;ENSBTAG00000015263;ENSBTAG00000019735;ENSBTAG00000020653
Cellular Component	GO:0030125	clathrin vesicle coat	10	21	0.0130165	0.0577609	ENSBTAG00000001657;ENSBTAG00000002769;ENSBTAG00000009915;ENSBTAG00000010292;ENSBTAG00000010740;ENSBTAG00000013282;ENSBTAG00000016708;ENSBTAG00000017771;ENSBTAG00000020237;ENSBTAG00000046996
Cellular Component	GO:0034045	pre-autophagosomal structure membrane	9	13	0.000588125	0.00408959	ENSBTAG00000000878;ENSBTAG00000003695;ENSBTAG00000005400;ENSBTAG00000007058;ENSBTAG00000010193;ENSBTAG00000012049;ENSBTAG00000012833;ENSBTAG00000012987;ENSBTAG00000017525
Cellular Component	GO:0000940	condensed chromosome outer kinetochore	9	14	0.00130408	0.00806975	ENSBTAG00000003314;ENSBTAG00000004965;ENSBTAG00000007237;ENSBTAG00000008180;ENSBTAG00000018216;ENSBTAG00000021673;ENSBTAG00000021680;ENSBTAG00000024449;ENSBTAG00000034598
Cellular Component	GO:0030127	COPII vesicle coat	9	14	0.00130408	0.00806975	ENSBTAG00000002791;ENSBTAG00000003619;ENSBTAG00000003708;ENSBTAG00000009726;ENSBTAG00000010378;ENSBTAG00000017825;ENSBTAG00000018295;ENSBTAG00000018322;ENSBTAG00000046493
Cellular Component	GO:0035145	exon-exon junction complex	9	14	0.00130408	0.00806975	ENSBTAG00000000267;ENSBTAG00000000288;ENSBTAG00000003485;ENSBTAG00000006250;ENSBTAG00000014766;ENSBTAG00000016023;ENSBTAG00000019235;ENSBTAG00000024095;ENSBTAG00000026995
Cellular Component	GO:0000930	gamma-tubulin complex	9	15	0.00258391	0.0144634	ENSBTAG00000004448;ENSBTAG00000005905;ENSBTAG00000006395;ENSBTAG00000006532;ENSBTAG00000008636;ENSBTAG00000010739;ENSBTAG00000014479;ENSBTAG00000044184;ENSBTAG00000048960
Cellular Component	GO:0030014	CCR4-NOT complex	9	16	0.0046849	0.0244013	ENSBTAG00000000546;ENSBTAG00000003748;ENSBTAG00000003807;ENSBTAG00000005913;ENSBTAG00000014900;ENSBTAG00000016469;ENSBTAG00000017362;ENSBTAG00000018036;ENSBTAG00000049571
Cellular Component	GO:0090543	Flemming body	9	19	0.0189848	0.0769083	ENSBTAG00000004792;ENSBTAG00000005129;ENSBTAG00000005432;ENSBTAG00000008805;ENSBTAG00000010492;ENSBTAG00000019883;ENSBTAG00000020861;ENSBTAG00000048271;ENSBTAG00000050948
Cellular Component	GO:0005721	pericentric heterochromatin	9	20	0.0274832	0.106537	ENSBTAG00000002078;ENSBTAG00000002260;ENSBTAG00000002736;ENSBTAG00000005197;ENSBTAG00000005979;ENSBTAG00000006246;ENSBTAG00000006551;ENSBTAG00000016105;ENSBTAG00000049437
Cellular Component	GO:0070971	endoplasmic reticulum exit site	9	20	0.0274832	0.106537	ENSBTAG00000002791;ENSBTAG00000003619;ENSBTAG00000003708;ENSBTAG00000007080;ENSBTAG00000012758;ENSBTAG00000016363;ENSBTAG00000020180;ENSBTAG00000023933;ENSBTAG00000046493
Cellular Component	GO:0071203	WASH complex	8	9	6.42399e-05	0.000562724	ENSBTAG00000000021;ENSBTAG00000001942;ENSBTAG00000002966;ENSBTAG00000004554;ENSBTAG00000010275;ENSBTAG00000014295;ENSBTAG00000015010;ENSBTAG00000033735
Cellular Component	GO:0030126	COPI vesicle coat	8	11	0.000740865	0.00502225	ENSBTAG00000000807;ENSBTAG00000004333;ENSBTAG00000005384;ENSBTAG00000006556;ENSBTAG00000006690;ENSBTAG00000007933;ENSBTAG00000013212;ENSBTAG00000014843
Cellular Component	GO:0016581	NuRD complex	8	12	0.00176521	0.0106307	ENSBTAG00000002820;ENSBTAG00000003034;ENSBTAG00000006678;ENSBTAG00000011849;ENSBTAG00000012698;ENSBTAG00000020117;ENSBTAG00000038409;ENSBTAG00000047606
Cellular Component	GO:0019908	nuclear cyclin-dependent protein kinase holoenzyme complex	8	12	0.00176521	0.0106307	ENSBTAG00000001528;ENSBTAG00000004695;ENSBTAG00000005792;ENSBTAG00000005861;ENSBTAG00000006640;ENSBTAG00000008136;ENSBTAG00000014158;ENSBTAG00000018636
Cellular Component	GO:0090545	CHD-type complex	8	12	0.00176521	0.0106307	ENSBTAG00000002820;ENSBTAG00000003034;ENSBTAG00000006678;ENSBTAG00000011849;ENSBTAG00000012698;ENSBTAG00000020117;ENSBTAG00000038409;ENSBTAG00000047606
Cellular Component	GO:0070822	Sin3-type complex	8	14	0.00677451	0.0344861	ENSBTAG00000001161;ENSBTAG00000009330;ENSBTAG00000009985;ENSBTAG00000011849;ENSBTAG00000012698;ENSBTAG00000013271;ENSBTAG00000015976;ENSBTAG00000019757
Cellular Component	GO:0000145	exocyst	8	16	0.0184426	0.0749371	ENSBTAG00000007910;ENSBTAG00000008606;ENSBTAG00000013042;ENSBTAG00000020215;ENSBTAG00000020799;ENSBTAG00000021116;ENSBTAG00000032637;ENSBTAG00000035995
Cellular Component	GO:0030687	preribosome, large subunit precursor	8	16	0.0184426	0.0749371	ENSBTAG00000000683;ENSBTAG00000001666;ENSBTAG00000002210;ENSBTAG00000007728;ENSBTAG00000008118;ENSBTAG00000015424;ENSBTAG00000017418;ENSBTAG00000021060
Cellular Component	GO:0032806	carboxy-terminal domain protein kinase complex	8	16	0.0184426	0.0749371	ENSBTAG00000002072;ENSBTAG00000004695;ENSBTAG00000005160;ENSBTAG00000005861;ENSBTAG00000006640;ENSBTAG00000008136;ENSBTAG00000014158;ENSBTAG00000018636
Cellular Component	GO:0035098	ESC/E(Z) complex	8	16	0.0184426	0.0749371	ENSBTAG00000001634;ENSBTAG00000002820;ENSBTAG00000010818;ENSBTAG00000011849;ENSBTAG00000014023;ENSBTAG00000016958;ENSBTAG00000018752;ENSBTAG00000021677
Cellular Component	GO:0072357	PTW/PP1 phosphatase complex	7	7	3.85224e-05	0.00034877	ENSBTAG00000002960;ENSBTAG00000006933;ENSBTAG00000011198;ENSBTAG00000012146;ENSBTAG00000012447;ENSBTAG00000014609;ENSBTAG00000015146
Cellular Component	GO:0000805	X chromosome	7	9	0.00087812	0.00586427	ENSBTAG00000003354;ENSBTAG00000004021;ENSBTAG00000004964;ENSBTAG00000009330;ENSBTAG00000012659;ENSBTAG00000014017;ENSBTAG00000016105
Cellular Component	GO:0031080	nuclear pore outer ring	7	10	0.0023329	0.0131677	ENSBTAG00000000022;ENSBTAG00000004965;ENSBTAG00000010196;ENSBTAG00000010792;ENSBTAG00000013949;ENSBTAG00000017825;ENSBTAG00000021125
Cellular Component	GO:0071564	npBAF complex	7	10	0.0023329	0.0131677	ENSBTAG00000003929;ENSBTAG00000009988;ENSBTAG00000011531;ENSBTAG00000014697;ENSBTAG00000015308;ENSBTAG00000019220;ENSBTAG00000031567
Cellular Component	GO:0016580	Sin3 complex	7	11	0.00511896	0.0264578	ENSBTAG00000001161;ENSBTAG00000009330;ENSBTAG00000009985;ENSBTAG00000011849;ENSBTAG00000012698;ENSBTAG00000013271;ENSBTAG00000015976
Cellular Component	GO:0001741	XY body	7	12	0.00981422	0.0471152	ENSBTAG00000006551;ENSBTAG00000009330;ENSBTAG00000009988;ENSBTAG00000010982;ENSBTAG00000021143;ENSBTAG00000031567;ENSBTAG00000045779
Cellular Component	GO:0042555	MCM complex	7	12	0.00981422	0.0471152	ENSBTAG00000000629;ENSBTAG00000007749;ENSBTAG00000010721;ENSBTAG00000014380;ENSBTAG00000015172;ENSBTAG00000017021;ENSBTAG00000030965
Cellular Component	GO:0044322	endoplasmic reticulum quality control compartment	7	12	0.00981422	0.0471152	ENSBTAG00000003815;ENSBTAG00000005076;ENSBTAG00000012904;ENSBTAG00000016896;ENSBTAG00000019264;ENSBTAG00000020693;ENSBTAG00000048107
Cellular Component	GO:0000778	condensed nuclear chromosome kinetochore	7	13	0.0170075	0.0705942	ENSBTAG00000002613;ENSBTAG00000006404;ENSBTAG00000007237;ENSBTAG00000009432;ENSBTAG00000013915;ENSBTAG00000020865;ENSBTAG00000021673
Cellular Component	GO:0000780	condensed nuclear chromosome, centromeric region	7	13	0.0170075	0.0705942	ENSBTAG00000002613;ENSBTAG00000006404;ENSBTAG00000007237;ENSBTAG00000009432;ENSBTAG00000013915;ENSBTAG00000020865;ENSBTAG00000021673
Cellular Component	GO:0005662	DNA replication factor A complex	7	13	0.0170075	0.0705942	ENSBTAG00000003843;ENSBTAG00000006225;ENSBTAG00000007234;ENSBTAG00000007749;ENSBTAG00000009711;ENSBTAG00000013168;ENSBTAG00000014366
Cellular Component	GO:0033180	proton-transporting V-type ATPase, V1 domain	7	13	0.0170075	0.0705942	ENSBTAG00000002703;ENSBTAG00000003450;ENSBTAG00000007572;ENSBTAG00000010620;ENSBTAG00000012117;ENSBTAG00000013513;ENSBTAG00000018646
Cellular Component	GO:0032839	dendrite cytoplasm	7	14	0.0272405	0.106514	ENSBTAG00000002280;ENSBTAG00000002432;ENSBTAG00000008881;ENSBTAG00000010073;ENSBTAG00000014933;ENSBTAG00000016328;ENSBTAG00000030453
Cellular Component	GO:0005845	mRNA cap binding complex	6	7	0.000921439	0.00606352	ENSBTAG00000008873;ENSBTAG00000009142;ENSBTAG00000009522;ENSBTAG00000009732;ENSBTAG00000016894;ENSBTAG00000027069
Cellular Component	GO:0008024	positive transcription elongation factor complex b	6	7	0.000921439	0.00606352	ENSBTAG00000004695;ENSBTAG00000005861;ENSBTAG00000006640;ENSBTAG00000008136;ENSBTAG00000014158;ENSBTAG00000018636
Cellular Component	GO:0000796	condensin complex	6	8	0.00295045	0.016114	ENSBTAG00000002260;ENSBTAG00000005862;ENSBTAG00000008772;ENSBTAG00000012925;ENSBTAG00000014730;ENSBTAG00000016131
Cellular Component	GO:0031143	pseudopodium	6	8	0.00295045	0.016114	ENSBTAG00000003418;ENSBTAG00000010312;ENSBTAG00000012778;ENSBTAG00000016156;ENSBTAG00000034848;ENSBTAG00000045748
Cellular Component	GO:0034518	RNA cap binding complex	6	8	0.00295045	0.016114	ENSBTAG00000008873;ENSBTAG00000009142;ENSBTAG00000009522;ENSBTAG00000009732;ENSBTAG00000016894;ENSBTAG00000027069
Cellular Component	GO:0071141	SMAD protein complex	6	8	0.00295045	0.016114	ENSBTAG00000000625;ENSBTAG00000006919;ENSBTAG00000012441;ENSBTAG00000039916;ENSBTAG00000044118;ENSBTAG00000055062
Cellular Component	GO:0044754	autolysosome	6	9	0.00709511	0.0358476	ENSBTAG00000007399;ENSBTAG00000010242;ENSBTAG00000015591;ENSBTAG00000019565;ENSBTAG00000020359;ENSBTAG00000026290
Cellular Component	GO:0070775	H3 histone acetyltransferase complex	6	9	0.00709511	0.0358476	ENSBTAG00000002920;ENSBTAG00000007776;ENSBTAG00000009123;ENSBTAG00000013316;ENSBTAG00000018699;ENSBTAG00000046760
Cellular Component	GO:0000813	ESCRT I complex	6	10	0.0142384	0.0619601	ENSBTAG00000000320;ENSBTAG00000010355;ENSBTAG00000013563;ENSBTAG00000026320;ENSBTAG00000048809;ENSBTAG00000050426
Cellular Component	GO:0000815	ESCRT III complex	6	10	0.0142384	0.0619601	ENSBTAG00000004792;ENSBTAG00000007939;ENSBTAG00000013387;ENSBTAG00000013528;ENSBTAG00000013589;ENSBTAG00000033331
Cellular Component	GO:0005767	secondary lysosome	6	10	0.0142384	0.0619601	ENSBTAG00000007399;ENSBTAG00000010242;ENSBTAG00000015591;ENSBTAG00000019565;ENSBTAG00000020359;ENSBTAG00000026290
Cellular Component	GO:0000109	nucleotide-excision repair complex	6	12	0.0405493	0.145481	ENSBTAG00000000252;ENSBTAG00000000590;ENSBTAG00000004509;ENSBTAG00000007362;ENSBTAG00000007844;ENSBTAG00000021773
Cellular Component	GO:0000346	transcription export complex	6	12	0.0405493	0.145481	ENSBTAG00000001415;ENSBTAG00000005166;ENSBTAG00000009488;ENSBTAG00000013150;ENSBTAG00000014490;ENSBTAG00000035174
Cellular Component	GO:0048188	Set1C/COMPASS complex	6	12	0.0405493	0.145481	ENSBTAG00000000978;ENSBTAG00000002345;ENSBTAG00000002960;ENSBTAG00000011904;ENSBTAG00000015946;ENSBTAG00000047031
Cellular Component	GO:1990907	beta-catenin-TCF complex	6	12	0.0405493	0.145481	ENSBTAG00000002422;ENSBTAG00000005138;ENSBTAG00000005780;ENSBTAG00000006844;ENSBTAG00000015580;ENSBTAG00000016420
Cellular Component	GO:0034709	methylosome	5	6	0.00339853	0.0183385	ENSBTAG00000006646;ENSBTAG00000010890;ENSBTAG00000012177;ENSBTAG00000014102;ENSBTAG00000019930
Cellular Component	GO:0034098	VCP-NPL4-UFD1 AAA ATPase complex	5	7	0.00959125	0.0465417	ENSBTAG00000004284;ENSBTAG00000007577;ENSBTAG00000017744;ENSBTAG00000019105;ENSBTAG00000055051
Cellular Component	GO:0036513	Derlin-1 retrotranslocation complex	5	7	0.00959125	0.0465417	ENSBTAG00000003798;ENSBTAG00000005076;ENSBTAG00000008083;ENSBTAG00000008840;ENSBTAG00000020693
Cellular Component	GO:0071144	SMAD2-SMAD3 protein complex	5	7	0.00959125	0.0465417	ENSBTAG00000000625;ENSBTAG00000006919;ENSBTAG00000012441;ENSBTAG00000039916;ENSBTAG00000055062
Cellular Component	GO:0005677	chromatin silencing complex	5	8	0.0206593	0.0817283	ENSBTAG00000004420;ENSBTAG00000004706;ENSBTAG00000014023;ENSBTAG00000018752;ENSBTAG00000020819
Cellular Component	GO:0016593	Cdc73/Paf1 complex	5	8	0.0206593	0.0817283	ENSBTAG00000001671;ENSBTAG00000015566;ENSBTAG00000016703;ENSBTAG00000019193;ENSBTAG00000020428
Cellular Component	GO:0030123	AP-3 adaptor complex	5	8	0.0206593	0.0817283	ENSBTAG00000001407;ENSBTAG00000005016;ENSBTAG00000009034;ENSBTAG00000011567;ENSBTAG00000032055
Cellular Component	GO:0031371	ubiquitin conjugating enzyme complex	5	8	0.0206593	0.0817283	ENSBTAG00000003421;ENSBTAG00000009516;ENSBTAG00000010982;ENSBTAG00000027316;ENSBTAG00000045779
Cellular Component	GO:0070776	MOZ/MORF histone acetyltransferase complex	5	8	0.0206593	0.0817283	ENSBTAG00000002920;ENSBTAG00000007776;ENSBTAG00000009123;ENSBTAG00000013316;ENSBTAG00000046760
Cellular Component	GO:0097197	tetraspanin-enriched microdomain	5	8	0.0206593	0.0817283	ENSBTAG00000000224;ENSBTAG00000005481;ENSBTAG00000007253;ENSBTAG00000047495;ENSBTAG00000049163
Cellular Component	GO:0016600	flotillin complex	5	9	0.0376145	0.13714	ENSBTAG00000007993;ENSBTAG00000010073;ENSBTAG00000014182;ENSBTAG00000015991;ENSBTAG00000016420
Cellular Component	GO:0030877	beta-catenin destruction complex	5	9	0.0376145	0.13714	ENSBTAG00000001107;ENSBTAG00000005326;ENSBTAG00000016420;ENSBTAG00000016577;ENSBTAG00000018852
Cellular Component	GO:0031464	Cul4A-RING E3 ubiquitin ligase complex	5	9	0.0376145	0.13714	ENSBTAG00000002236;ENSBTAG00000006708;ENSBTAG00000018142;ENSBTAG00000018254;ENSBTAG00000021569
Cellular Component	GO:0005642	annulate lamellae	4	4	0.00300635	0.0163531	ENSBTAG00000000152;ENSBTAG00000004992;ENSBTAG00000013254;ENSBTAG00000046549
Cellular Component	GO:0005955	calcineurin complex	4	5	0.0122172	0.0568312	ENSBTAG00000010619;ENSBTAG00000019525;ENSBTAG00000020133;ENSBTAG00000020455
Cellular Component	GO:0042382	paraspeckles	4	5	0.0122172	0.0568312	ENSBTAG00000003934;ENSBTAG00000007323;ENSBTAG00000010207;ENSBTAG00000016328
Cellular Component	GO:0098592	cytoplasmic side of apical plasma membrane	4	5	0.0122172	0.0568312	ENSBTAG00000010347;ENSBTAG00000015013;ENSBTAG00000031707;ENSBTAG00000032637
Cellular Component	GO:0098826	endoplasmic reticulum tubular network membrane	4	5	0.0122172	0.0568312	ENSBTAG00000003330;ENSBTAG00000011104;ENSBTAG00000016167;ENSBTAG00000018061
Cellular Component	GO:1990745	EARP complex	4	5	0.0122172	0.0568312	ENSBTAG00000002643;ENSBTAG00000014255;ENSBTAG00000018126;ENSBTAG00000018387
Cellular Component	GO:0000839	Hrd1p ubiquitin ligase ERAD-L complex	4	6	0.0298546	0.111254	ENSBTAG00000005076;ENSBTAG00000008083;ENSBTAG00000020123;ENSBTAG00000020431
Cellular Component	GO:0005652	nuclear lamina	4	6	0.0298546	0.111254	ENSBTAG00000006065;ENSBTAG00000011263;ENSBTAG00000018178;ENSBTAG00000020136
Cellular Component	GO:0008290	F-actin capping protein complex	4	6	0.0298546	0.111254	ENSBTAG00000004072;ENSBTAG00000004554;ENSBTAG00000007806;ENSBTAG00000014295
Cellular Component	GO:0008385	IkappaB kinase complex	4	6	0.0298546	0.111254	ENSBTAG00000002625;ENSBTAG00000006268;ENSBTAG00000013658;ENSBTAG00000017367
Cellular Component	GO:0033503	HULC complex	4	6	0.0298546	0.111254	ENSBTAG00000003421;ENSBTAG00000009516;ENSBTAG00000010982;ENSBTAG00000045779
Cellular Component	GO:0042585	germinal vesicle	4	6	0.0298546	0.111254	ENSBTAG00000001717;ENSBTAG00000002082;ENSBTAG00000013009;ENSBTAG00000019552
Cellular Component	GO:0043218	compact myelin	4	6	0.0298546	0.111254	ENSBTAG00000001403;ENSBTAG00000001776;ENSBTAG00000011767;ENSBTAG00000040001
Cellular Component	GO:0043220	Schmidt-Lanterman incisure	4	6	0.0298546	0.111254	ENSBTAG00000001403;ENSBTAG00000001776;ENSBTAG00000011767;ENSBTAG00000040001
Cellular Component	GO:0044352	pinosome	4	6	0.0298546	0.111254	ENSBTAG00000014824;ENSBTAG00000016549;ENSBTAG00000016779;ENSBTAG00000030784
Cellular Component	GO:0044354	macropinosome	4	6	0.0298546	0.111254	ENSBTAG00000014824;ENSBTAG00000016549;ENSBTAG00000016779;ENSBTAG00000030784
Cellular Component	GO:0070765	gamma-secretase complex	4	6	0.0298546	0.111254	ENSBTAG00000004334;ENSBTAG00000005694;ENSBTAG00000011757;ENSBTAG00000021482
Cellular Component	GO:0097550	transcriptional preinitiation complex	4	6	0.0298546	0.111254	ENSBTAG00000007159;ENSBTAG00000012753;ENSBTAG00000013652;ENSBTAG00000016848
Cellular Component	GO:0000814	ESCRT II complex	3	3	0.0128426	0.057177	ENSBTAG00000004307;ENSBTAG00000018803;ENSBTAG00000019906
Cellular Component	GO:0030906	retromer, cargo-selective complex	3	3	0.0128426	0.057177	ENSBTAG00000002493;ENSBTAG00000008417;ENSBTAG00000016882
Cellular Component	GO:0035101	FACT complex	3	3	0.0128426	0.057177	ENSBTAG00000000375;ENSBTAG00000007749;ENSBTAG00000020421
Cellular Component	GO:0042827	platelet dense granule	3	3	0.0128426	0.057177	ENSBTAG00000007399;ENSBTAG00000017038;ENSBTAG00000020455
Cellular Component	GO:0044611	nuclear pore inner ring	3	3	0.0128426	0.057177	ENSBTAG00000002458;ENSBTAG00000010613;ENSBTAG00000011127
Cellular Component	GO:0097413	Lewy body	3	3	0.0128426	0.057177	ENSBTAG00000006708;ENSBTAG00000016896;ENSBTAG00000020634
Cellular Component	GO:0097443	sorting endosome	3	3	0.0128426	0.057177	ENSBTAG00000006616;ENSBTAG00000012314;ENSBTAG00000016501
Cellular Component	GO:0097470	ribbon synapse	3	3	0.0128426	0.057177	ENSBTAG00000001398;ENSBTAG00000003397;ENSBTAG00000008126
Cellular Component	GO:0005658	alpha DNA polymerase:primase complex	3	4	0.0423512	0.148781	ENSBTAG00000007937;ENSBTAG00000008170;ENSBTAG00000011455
Cellular Component	GO:0030289	protein phosphatase 4 complex	3	4	0.0423512	0.148781	ENSBTAG00000000545;ENSBTAG00000009822;ENSBTAG00000012928
Cellular Component	GO:0031465	Cul4B-RING E3 ubiquitin ligase complex	3	4	0.0423512	0.148781	ENSBTAG00000018142;ENSBTAG00000018569;ENSBTAG00000021569
Cellular Component	GO:0031499	TRAMP complex	3	4	0.0423512	0.148781	ENSBTAG00000003381;ENSBTAG00000006114;ENSBTAG00000010518
Cellular Component	GO:0032593	insulin-responsive compartment	3	4	0.0423512	0.148781	ENSBTAG00000000985;ENSBTAG00000003097;ENSBTAG00000010356
Cellular Component	GO:0035976	AP1 complex	3	4	0.0423512	0.148781	ENSBTAG00000004037;ENSBTAG00000004322;ENSBTAG00000052791
Cellular Component	GO:0071797	LUBAC complex	3	4	0.0423512	0.148781	ENSBTAG00000003186;ENSBTAG00000012235;ENSBTAG00000017002
Cellular Component	GO:0090443	FAR/SIN/STRIPAK complex	3	4	0.0423512	0.148781	ENSBTAG00000005830;ENSBTAG00000018590;ENSBTAG00000021845
