# Supplementary material for: Identification and functional analysis of circular RNAs during mitochondrial damage induced by infectious bovine rhinotracheitis virus infection in Madin–Darby bovine kidney cells
Source: Research Square preprint supplement (doi:10.21203/rs.3.rs-6754910/v1), 2025-06-20
Supplement: Supplementary file 6 [file 6e4d7a5592dfeafe01b0a2ee.xlsx]

## Sheet: Table S11
Table S11：Target gene prediction results of differentially expressed miRNAs
miRNA	target	Gene	target_start	target_end	energy(kcal/mol)	target_region(3'->5')	mirna-target_pairing(5'->3')	miRNA_sequence(5'->3')	Symbol
bta-miR-148a	ENSBTAT00000000005	ENSBTAG00000000005	419	439	-13.43	cGTCACGTCCCGT-TAGActtg	x|||||||xxx||x|x||xxxx	tCAGTGCACTACAGAACTttgt	GRK3
bta-miR-148a	ENSBTAT00000000009	ENSBTAG00000000009	1250	1270	-12.47	tGTCACGTCTTC-CTTTAAAtt	x|||||||xx|xx|||x|||xx	tCAGTGCACTACAGAACTTTgt	FOXF1
bta-miR-148a	ENSBTAT00000000016	ENSBTAG00000000013	1854	1875	-14.23	aGTCACGTacaaagatccctac	x|||||||xxxxxxxxxxxxxx	tCAGTGCActacagaactttgt	PRKAA1
bta-miR-148a	ENSBTAT00000000043	ENSBTAG00000000039	475	493	-12.1	tGTCACGTC---TCTGCAAAtt	x|||||||xxxx|||xx|||xx	tCAGTGCACTACAGAACTTTgt	SIRT7
bta-miR-148a	ENSBTAT00000000044	ENSBTAG00000000040	572	593	-18.1	aGTCACGTTGTGcagtccgcac	x|||||||x:||xxxxxxxxxx	tCAGTGCACTACagaactttgt	MAFG
bta-miR-148a	ENSBTAT00000000049	ENSBTAG00000000044	1210	1231	-16.81	aGTCACGTTTAGTCgcaaccac	x|||||||xxx|||xxxxxxxx	tCAGTGCACTACAGaactttgt	MYADML2
bta-miR-148a	ENSBTAT00000000060	ENSBTAG00000000054	218	239	-18.61	gGTCACGTccgccggggagacg	x|||||||xxxxxxxxxxxxxx	tCAGTGCActacagaactttgt	SNAPC4
bta-miR-148a	ENSBTAT00000000096	ENSBTAG00000000087	364	386	-17.27	aGTCACGTTTATGTTCTTAGtag	x|||||||xx||||:x|x|:xxx	tCAGTGCAC-TACAGAACTTtgt	HSD17B12
bta-miR-148a	ENSBTAT00000000097	ENSBTAG00000000088	250	276	-18.16	aGTCACGTCTGTAAATGTCTTttttta	x|||||||xx|xxx|||||||xxxxxx	tCAGTGCA--C---TACAGAActttgt	ALCAM
bta-miR-148a	ENSBTAT00000000099	ENSBTAG00000000090	606	627	-17.74	cGTCACGTGGGGgaaggtggga	x||||||||:x|xxxxxxxxxx	tCAGTGCACTACagaactttgt	SEC31B
bta-miR-148a	ENSBTAT00000000104	ENSBTAG00000000094	284	304	-12.72	tGTCACGT-ATATTaattcagt	x|||||||x||x|:xxxxxxxx	tCAGTGCACTACAGaactttgt	ATPAF1
bta-miR-148a	ENSBTAT00000000158	ENSBTAG00000000137	1060	1081	-15.84	tGTCACGTAACGTGTTTACAtg	x|||||||x|x||x||x|x|xx	tCAGTGCACTACAGAACTTTgt	FRYL
bta-miR-148a	ENSBTAT00000000237	ENSBTAG00000000202	1048	1069	-14.37	aGTCACGTttccgacctcgatc	x|||||||xxxxxxxxxxxxxx	tCAGTGCActacagaactttgt	SLC25A19
bta-miR-148a	ENSBTAT00000000244	ENSBTAG00000000205	89	110	-14.08	aGTCACGTCAACAGAAGAAAag	x|||||||x|xxxxxx||||xx	tCAGTGCACTACAGAACTTTgt	MMD
bta-miR-148a	ENSBTAT00000000294	ENSBTAG00000000240	148	169	-14.15	tGTCACGTCTTAAGTCAAAAga	x|||||||xx|xxx|xx|||xx	tCAGTGCACTACAGAACTTTgt	AKAP7
bta-miR-148a	ENSBTAT00000000331	ENSBTAG00000000266	1550	1570	-14.5	tGTCACGTC-TGTaaagtagac	x|||||||xx|||xxxxxxxxx	tCAGTGCACTACAgaactttgt	NAB1
bta-miR-148a	ENSBTAT00000000348	ENSBTAG00000000279	433	454	-11.41	cGTCACGTCCTACCCTAAccac	x|||||||xx|xx|x|x|xxxx	tCAGTGCACTACAGAACTttgt	RAB26
bta-miR-148a	ENSBTAT00000000353	ENSBTAG00000000283	563	584	-18.28	aGTCACGTCTGGTCGTccgggt	x|||||||xxx|||x|xxxxxx	tCAGTGCACTACAGAActttgt	CSF1
bta-miR-148a	ENSBTAT00000000374	ENSBTAG00000000296	84	107	-14.67	cGTCACGTTCAGACTCCTGAcgag	x|||||||xxx|x||xx|||xxxx	tCAGTGCACTACAGA--ACTttgt	IMPDH1
bta-miR-148a	ENSBTAT00000000434	ENSBTAG00000000329	533	559	-18.91	aGTCACGTCATGAACTGTCTTACAAag	x|||||||xxx||xx||||||xx||xx	tCAGTGCA---CT--ACAGAACTTTgt	MEGF10
bta-miR-148a	ENSBTAT00000000490	ENSBTAG00000000379	400	422	-12.81	tGTCACGTTGACCTTTATAAAaa	x|||||||x||xx|:|xx|||xx	tCAGTGCA-CTACAGAACTTTgt	GOLT1B
bta-miR-148a	ENSBTAT00000000497	ENSBTAG00000000385	927	948	-13.91	tGTCACGTAATTGCAAGAAGta	x|||||||x||xx|xx|||:xx	tCAGTGCACTACAGAACTTTgt	ZBTB18
bta-miR-148a	ENSBTAT00000000529	ENSBTAG00000000414	8	29	-14.54	cGTCACGTccacggtccgaccg	x|||||||xxxxxxxxxxxxxx	tCAGTGCActacagaactttgt	FUT6
bta-miR-148a	ENSBTAT00000000549	ENSBTAG00000000428	796	816	-21.29	cGTCACGTGA-GTCTgctctgg	x|||||||||x||||xxxxxxx	tCAGTGCACTACAGAactttgt	BAK1
bta-miR-148a	ENSBTAT00000000583	ENSBTAG00000000459	162	183	-18.08	gGTCACGTGAacacgtttctcc	x|||||||||xxxxxxxxxxxx	tCAGTGCACTacagaactttgt	POMGNT2
bta-miR-148a	ENSBTAT00000000631	ENSBTAG00000000494	540	563	-20.27	aGTCACGTCGAGTGGCTTGGtgtg	x|||||||x||x||x||||:xxxx	tCAGTGCA-CT-ACAGAACTttgt	PDE4D
bta-miR-148a	ENSBTAT00000000651	ENSBTAG00000000510	185	205	-19.25	tGTCACGTCCGGTCT-GAActg	x|||||||xxx||||x|||xxx	tCAGTGCACTACAGAACTTtgt	ATG101
bta-miR-148a	ENSBTAT00000000735	ENSBTAG00000000563	516	537	-16.91	aGTCACGTcggacgaagcggga	x|||||||xxxxxxxxxxxxxx	tCAGTGCActacagaactttgt	MYD88
bta-miR-148a	ENSBTAT00000000842	ENSBTAG00000000640	186	209	-14.81	aGTCACGTCGCACTGA-TTGAcgtt	x|||||||x|x|x||xx||||xxxx	tCAGTGCA-C-T-ACAGAACTttgt	SELENOS
bta-miR-148a	ENSBTAT00000000941	ENSBTAG00000000704	84	104	-14.64	tGTCACGTCCT-TTGTGAAcga	x|||||||xx|x|:x||||xxx	tCAGTGCACTACAGAACTTtgt	GUSB
bta-miR-148a	ENSBTAT00000000944	ENSBTAG00000000706	36	55	-20.18	aGTCACGT-A-GTCGGGAAGgg	x|||||||x|x|||xx|||:xx	tCAGTGCACTACAGAACTTTgt	ADAMTS1
bta-miR-148a	ENSBTAT00000000946	ENSBTAG00000000707	786	807	-16.76	aGTCACGTcccgagtcagcgag	x|||||||xxxxxxxxxxxxxx	tCAGTGCActacagaactttgt	CCN4
bta-miR-148a	ENSBTAT00000000955	ENSBTAG00000000717	135	153	-16.3	gGTCACGTG---TCTTccacct	x||||||||xxx||||xxxxxx	tCAGTGCACTACAGAActttgt	PLPP2
bta-miR-148a	ENSBTAT00000001113	ENSBTAG00000000837	25	46	-14.9	aGTCACGTTTCGTgcggtcagt	x|||||||xxx||xxxxxxxxx	tCAGTGCACTACAgaactttgt	PARP1
bta-miR-148a	ENSBTAT00000001156	ENSBTAG00000000869	1134	1155	-18.06	aGTCACGTGTAATCTatttgtt	x||||||||xxx|||xxxxxxx	tCAGTGCACTACAGAactttgt	OBI1
bta-miR-148a	ENSBTAT00000001242	ENSBTAG00000000939	72	93	-13.44	cGTCACGTcccgacgaggtgtg	x|||||||xxxxxxxxxxxxxx	tCAGTGCActacagaactttgt	KIF16B
bta-miR-148a	ENSBTAT00000001246	ENSBTAG00000000941	1757	1780	-17.26	gGTCACGTTGTAATTTTTGActca	x|||||||x:|xxx|:||||xxxx	tCAGTGCACTAC--AGAACTttgt	PLEKHB2
bta-miR-148a	ENSBTAT00000001332	ENSBTAG00000001005	2316	2337	-17.23	tGTCACGTGGTcacccctttta	x||||||||:|xxxxxxxxxxx	tCAGTGCACTAcagaactttgt	ZNF280B
bta-miR-148a	ENSBTAT00000001338	ENSBTAG00000001009	9	29	-14.13	tGTCACGTCGT-TCTTctgtct	x|||||||x:|x||||xxxxxx	tCAGTGCACTACAGAActttgt	HCLS1
bta-miR-148a	ENSBTAT00000001455	ENSBTAG00000001100	568	590	-13.73	tGTCACGTCAAAGTCcgtcatcc	x|||||||x|xx|||xxxxxxxx	tCAGTGCACTA-CAGaactttgt	IL22RA1
bta-miR-148a	ENSBTAT00000001456	ENSBTAG00000001101	1003	1024	-18.7	tGTCACGTGGTAAACCGAGAaa	x||||||||:|xxxxx||:|xx	tCAGTGCACTACAGAACTTTgt	IFNLR1
bta-miR-148a	ENSBTAT00000001463	ENSBTAG00000001105	886	907	-12.34	tGTCACGTtcacatttagttgt	x|||||||xxxxxxxxxxxxxx	tCAGTGCActacagaactttgt	ANXA4
bta-miR-148a	ENSBTAT00000001510	ENSBTAG00000001134	1001	1022	-12.75	cGTCACGTccgccgggacctcc	x|||||||xxxxxxxxxxxxxx	tCAGTGCActacagaactttgt	SRRT
bta-miR-148a	ENSBTAT00000001522	ENSBTAG00000001144	410	431	-12.72	tGTCACGTAAaataatatgtag	x|||||||x|xxxxxxxxxxxx	tCAGTGCACTacagaactttgt	NAA20
bta-miR-148a	ENSBTAT00000001630	ENSBTAG00000001233	1255	1276	-12.72	tGTCACGTAAcacgatattata	x|||||||x|xxxxxxxxxxxx	tCAGTGCACTacagaactttgt	MPZL3
bta-miR-148a	ENSBTAT00000001655	ENSBTAG00000001252	377	398	-12.2	tGTCACGTTGTATATTAAAtta	x|||||||x:|x|x||x||xxx	tCAGTGCACTACAGAACTTtgt	HIVEP1
bta-miR-148a	ENSBTAT00000001782	ENSBTAG00000001353	536	557	-16.09	gGTCACGTCACGggtccagggc	x|||||||x|x|xxxxxxxxxx	tCAGTGCACTACagaactttgt	PMPCA
bta-miR-148a	ENSBTAT00000001785	ENSBTAG00000001356	9	29	-15.22	gGTCACGTAAAACCT-GAGAga	x|||||||x|xxx||x||:|xx	tCAGTGCACTACAGAACTTTgt	USP38
bta-miR-148a	ENSBTAT00000001802	ENSBTAG00000001368	935	956	-16.29	gGTCACGTGTTcacccttctaa	x||||||||x|xxxxxxxxxxx	tCAGTGCACTAcagaactttgt	LGALS3BP
bta-miR-148a	ENSBTAT00000001838	ENSBTAG00000001398	461	479	-13.53	aGTCACGTC---TTTTTAAccg	x|||||||xxxx|:||x||xxx	tCAGTGCACTACAGAACTTtgt	ATP2A2
bta-miR-148a	ENSBTAT00000001846	ENSBTAG00000001407	1155	1176	-11.41	cGTCACGTccccattctccgcg	x|||||||xxxxxxxxxxxxxx	tCAGTGCActacagaactttgt	AP3S2
bta-miR-148a	ENSBTAT00000001868	ENSBTAG00000001425	772	799	-18.14	tGTCACGTAGGGAAGGATCCTTCAGAgt	x|||||||xxx||x|xx||x||x|:|xx	tCAGTGCA---CTAC--AG-AACTTTgt	FBXO11
bta-miR-148a	ENSBTAT00000001947	ENSBTAG00000001488	173	192	-16.69	tGTCACGT-A-GTCCTGActtt	x|||||||x|x|||x|||xxxx	tCAGTGCACTACAGAACTttgt	OTC
bta-miR-148a	ENSBTAT00000001995	ENSBTAG00000001523	626	644	-13.44	tGTCACGTAATAT---GAAAgt	x|||||||x||x|xxx||||xx	tCAGTGCACTACAGAACTTTgt	YES1
bta-miR-148a	ENSBTAT00000002076	ENSBTAG00000001585	2866	2887	-12.02	tGTCACGTCAccatactttttg	x|||||||x|xxxxxxxxxxxx	tCAGTGCACTacagaactttgt	WIPF1
bta-miR-148a	ENSBTAT00000002094	ENSBTAG00000001597	1256	1279	-20.99	gGTCACGTGTCCTGTCgcaccagg	x||||||||xxx||||xxxxxxxx	tCAGTGCACT--ACAGaactttgt	PITPNM2
bta-miR-148a	ENSBTAT00000002096	ENSBTAG00000001603	1788	1809	-14.52	gGTCACGTTAaagataagtccg	x|||||||x|xxxxxxxxxxxx	tCAGTGCACTacagaactttgt	YIPF7
bta-miR-148a	ENSBTAT00000002166	ENSBTAG00000001656	381	402	-18.42	aGTCACGTTGGT-TCCTGAtgtc	x|||||||x|:|x||x|||xxxx	tCAGTGCA-CTACAGAACTttgt	TMEM254
bta-miR-148a	ENSBTAT00000002222	ENSBTAG00000001694	655	676	-19.56	aGTCACGTGACGgaaattttcg	x|||||||||x|xxxxxxxxxx	tCAGTGCACTACagaactttgt	TYRO3
bta-miR-148a	ENSBTAT00000002230	ENSBTAG00000001703	2252	2277	-23.96	gGTCACGTGTGTTGTCCGTTGGGGgg	x||||||||xxx||||xx|||:::xx	tCAGTGCACT--ACAG--AACTTTgt	SYT13
bta-miR-148a	ENSBTAT00000002285	ENSBTAG00000001739	760	783	-13.33	tGTCACGTTTTCTCCGTCGAAAag	x|||||||xx|x||xx|x||||xx	tCAGTGCACTACAG--AACTTTgt	CDH20
bta-miR-148a	ENSBTAT00000002289	ENSBTAG00000001744	1953	1972	-13.76	cGTCACGTC-T-TCTGGAccca	x|||||||xx|x|||x||xxxx	tCAGTGCACTACAGAACTttgt	BET1L
bta-miR-148a	ENSBTAT00000002301	ENSBTAG00000001755	862	883	-12.05	tGTCACGTttaacatacactat	x|||||||xxxxxxxxxxxxxx	tCAGTGCActacagaactttgt	NEUROD1
bta-miR-148a	ENSBTAT00000002311	ENSBTAG00000001763	257	276	-17.92	gGTCACGT--TGTCcactagct	x|||||||xx||||xxxxxxxx	tCAGTGCACTACAGaactttgt	NR2C2AP
bta-miR-148a	ENSBTAT00000002357	ENSBTAG00000001801	2108	2129	-14.62	tGTCACGTcttaaacattgtct	x|||||||xxxxxxxxxxxxxx	tCAGTGCActacagaactttgt	SYT4
bta-miR-148a	ENSBTAT00000002373	ENSBTAG00000001815	191	212	-14.4	gGTCACGTttcagggagtttta	x|||||||xxxxxxxxxxxxxx	tCAGTGCActacagaactttgt	ARHGEF5
bta-miR-148a	ENSBTAT00000002383	ENSBTAG00000001822	462	483	-15.16	gGTCACGTctcctccatgggtg	x|||||||xxxxxxxxxxxxxx	tCAGTGCActacagaactttgt	SNX10
bta-miR-148a	ENSBTAT00000002389	ENSBTAG00000001826	487	507	-18.11	gGTCACGTCG-GTCTAAAAGaa	x|||||||x:x||||xx||:xx	tCAGTGCACTACAGAACTTTgt	SASH1
bta-miR-148a	ENSBTAT00000002462	ENSBTAG00000001892	71	92	-13.22	gGTCACGTttaaaaccaatcga	x|||||||xxxxxxxxxxxxxx	tCAGTGCActacagaactttgt	YAE1
bta-miR-148a	ENSBTAT00000002463	ENSBTAG00000001893	317	336	-16.11	cGTCACGTC--GTCATGTAcac	x|||||||xxx|||x||x|xxx	tCAGTGCACTACAGAACTTtgt	TM4SF4
bta-miR-148a	ENSBTAT00000002525	ENSBTAG00000001941	1118	1139	-12.72	tGTCACGTagcacccactagac	x|||||||xxxxxxxxxxxxxx	tCAGTGCActacagaactttgt	SEMA4D
bta-miR-148a	ENSBTAT00000002538	ENSBTAG00000039483	1732	1751	-13.17	cGTCACGTC--GTTTTAAGGgt	x|||||||xxx||:||x|::xx	tCAGTGCACTACAGAACTTTgt	DSG3
bta-miR-148a	ENSBTAT00000002604	ENSBTAG00000002010	2177	2199	-16.85	tGTCACGTAATCTTCTTGttatg	x|||||||x||x|x||||xxxxx	tCAGTGCACTACA-GAACtttgt	PI4K2A
bta-miR-148a	ENSBTAT00000002631	ENSBTAG00000002030	5	26	-14.44	gGTCACGTAAaacgaattccga	x|||||||x|xxxxxxxxxxxx	tCAGTGCACTacagaactttgt	SPP2
bta-miR-148a	ENSBTAT00000002634	ENSBTAG00000002033	86	110	-16.99	tGTCACGTTTTGGGTCGTTTAGAct	x|||||||xx||xx||x||x|:|xx	tCAGTGCACTAC--AG-AACTTTgt	UBXN2A
bta-miR-148a	ENSBTAT00000002687	ENSBTAG00000002078	243	265	-16.56	gGTCACGTCGGTATCGTAAGGtc	x|||||||x|:|x||x|x|::xx	tCAGTGCA-CTACAGAACTTTgt	KDM4A
bta-miR-148a	ENSBTAT00000002689	ENSBTAG00000002080	636	657	-18.08	gGTCACGTGAattaattattcg	x|||||||||xxxxxxxxxxxx	tCAGTGCACTacagaactttgt	CCN3
bta-miR-148a	ENSBTAT00000002690	ENSBTAG00000002081	532	553	-15.96	gGTCACGTcccgaccggtctca	x|||||||xxxxxxxxxxxxxx	tCAGTGCActacagaactttgt	BMPR1B
bta-miR-148a	ENSBTAT00000002751	ENSBTAG00000002129	731	753	-15.91	aGTCACGTACTTTAGACGAAAac	x|||||||xx|x|xxxx||||xx	tCAGTGCACTACAGAA-CTTTgt	KLF5
bta-miR-148a	ENSBTAT00000002800	ENSBTAG00000002163	1051	1075	-12.41	tGTCACGTTTAAGTGACTTTATAaa	x|||||||xxxx:||x|||x|x|xx	tCAGTGCAC---TACAGAACTTTgt	PTGER2
bta-miR-148a	ENSBTAT00000002922	ENSBTAG00000002267	2175	2197	-14.9	cGTCACGTGTTTCACTTATAAat	x||||||||x|xxx|||xx||xx	tCAGTGCACTACA-GAACTTTgt	ANKRD40
bta-miR-148a	ENSBTAT00000002936	ENSBTAG00000002277	533	553	-12.8	tGTCACGTC-TGTATATATAta	x|||||||xx|||x|xx|x|xx	tCAGTGCACTACAGAACTTTgt	MLLT1
bta-miR-148a	ENSBTAT00000002952	ENSBTAG00000002286	2813	2833	-16.71	tGTCACGT-ACGTCTgtcactt	x|||||||x|x||||xxxxxxx	tCAGTGCACTACAGAactttgt	DNAJC18
bta-miR-148a	ENSBTAT00000002984	ENSBTAG00000022890	1259	1279	-17.54	tGTCACGT-ATGAAAGGAActc	x|||||||x|||xxxx|||xxx	tCAGTGCACTACAGAACTTtgt	MBP
bta-miR-148a	ENSBTAT00000003027	ENSBTAG00000002345	964	985	-16.56	gGTCACGTACTGTAGTCACAaa	x|||||||xx|||xx|x|x|xx	tCAGTGCACTACAGAACTTTgt	SETD1A
bta-miR-148a	ENSBTAT00000003031	ENSBTAG00000017075	792	813	-13.76	gGTCACGTctccgggctgatcc	x|||||||xxxxxxxxxxxxxx	tCAGTGCActacagaactttgt	STX1A
bta-miR-148a	ENSBTAT00000003035	ENSBTAG00000002352	560	578	-13.44	tGTCACGT--TGT-TCGCAAgg	x|||||||xx|||x|x|x||xx	tCAGTGCACTACAGAACTTTgt	GGA2
bta-miR-148a	ENSBTAT00000003149	ENSBTAG00000002432	8	29	-12.72	tGTCACGTAATTACTTttgctt	x|||||||x||xx|||xxxxxx	tCAGTGCACTACAGAActttgt	ABHD13
bta-miR-148a	ENSBTAT00000003205	ENSBTAG00000002472	361	382	-16.94	tGTCACGTGtcctaccggggtg	x||||||||xxxxxxxxxxxxx	tCAGTGCACtacagaactttgt	CASP9
bta-miR-148a	ENSBTAT00000003225	ENSBTAG00000002484	613	634	-12.02	tGTCACGTCAccccacacgtcc	x|||||||x|xxxxxxxxxxxx	tCAGTGCACTacagaactttgt	CIAO3
bta-miR-148a	ENSBTAT00000003307	ENSBTAG00000002551	54	75	-16.55	gGTCACGTTAcaggtacgggac	x|||||||x|xxxxxxxxxxxx	tCAGTGCACTacagaactttgt	KCNJ8
bta-miR-148a	ENSBTAT00000003468	ENSBTAG00000002678	128	146	-17.43	gGTCACGT--T-TCTTGGttgt	x|||||||xx|x|||||:xxxx	tCAGTGCACTACAGAACTttgt	MED18
bta-miR-148a	ENSBTAT00000003485	ENSBTAG00000002691	66	89	-19.4	aGTCACGTACTCGGTCCTGGAttc	x|||||||xx|xx|||x||:|xxx	tCAGTGCACTA--CAGAACTTtgt	ELMOD1
bta-miR-148a	ENSBTAT00000003498	ENSBTAG00000002699	1581	1602	-15.28	gGTCACGTT-TACCAATGAAAgt	x|||||||xx|xx|xx|||||xx	tCAGTGCACTACAGA-ACTTTgt	KIT
bta-miR-148a	ENSBTAT00000003502	ENSBTAG00000002704	102	125	-20.35	cGTCACGTTCAGGTGTCC-GAGAag	x|||||||xxx|:||||xx||:|xx	tCAGTGCA---CTACAGAACTTTgt	POMT2
bta-miR-148a	ENSBTAT00000003535	ENSBTAG00000002727	523	544	-12.83	tGTCACGTcccgaaaatcgact	x|||||||xxxxxxxxxxxxxx	tCAGTGCActacagaactttgt	PHACTR4
bta-miR-148a	ENSBTAT00000003549	ENSBTAG00000002736	35	58	-20.53	aGTCACGTGCAACCCCTAGAGAcc	x||||||||xx|xxx||x||:|xx	tCAGTGCAC--TACAGAACTTTgt	DNMT1
bta-miR-148a	ENSBTAT00000003552	ENSBTAG00000004337	587	608	-12.21	cGTCACGTccagaccccatgtc	x|||||||xxxxxxxxxxxxxx	tCAGTGCActacagaactttgt	PDE1B
bta-miR-148a	ENSBTAT00000003560	ENSBTAG00000002746	115	137	-15.26	tGTCACGTTATGACGGTGCAAgt	x|||||||x|||x|xx||x||xx	tCAGTGCACTACAGA-ACTTTgt	OSTF1
bta-miR-148a	ENSBTAT00000003678	ENSBTAG00000002837	1157	1178	-13.28	cGTCACGTCGGACCGTGGtggt	x|||||||x:xxx|x||:xxxx	tCAGTGCACTACAGAACTttgt	TOR1B
bta-miR-148a	ENSBTAT00000003689	ENSBTAG00000015885	836	856	-15.36	cGTCACGT-ACCAATCGAGAca	x|||||||x|xxxx|x||:|xx	tCAGTGCACTACAGAACTTTgt	PPFIA4
bta-miR-148a	ENSBTAT00000003706	ENSBTAG00000002858	63	84	-13.56	tGTCACGTAAAGaggggattca	x|||||||x|x|xxxxxxxxxx	tCAGTGCACTACagaactttgt	ACBD7
bta-miR-148a	ENSBTAT00000003716	ENSBTAG00000002863	88	109	-13.85	aGTCACGTCTCGTACCGAccga	x|||||||xxx||xxx||xxxx	tCAGTGCACTACAGAACTttgt	ACAA2
bta-miR-148a	ENSBTAT00000003789	ENSBTAG00000002917	260	281	-16.91	tGTCACGTGAaattactgtatg	x|||||||||xxxxxxxxxxxx	tCAGTGCACTacagaactttgt	PRKAG2
bta-miR-148a	ENSBTAT00000003855	ENSBTAG00000002960	2243	2264	-11.66	cGTCACGTCACGTATAAAAGtt	x|||||||x|x||x|xx||:xx	tCAGTGCACTACAGAACTTTgt	WDR82
bta-miR-148a	ENSBTAT00000003862	ENSBTAG00000002965	1348	1368	-16.97	tGTCACGTGA-GACTTcccagg	x|||||||||x|x|||xxxxxx	tCAGTGCACTACAGAActttgt	NEURL3
bta-miR-148a	ENSBTAT00000003883	ENSBTAG00000002982	1068	1089	-16.55	aGTCACGTTTCGTTGTAGAGgt	x|||||||xxx||:x|x:|:xx	tCAGTGCACTACAGAACTTTgt	PITPNM3
bta-miR-148a	ENSBTAT00000003884	ENSBTAG00000002983	381	402	-21.02	gGTCACGTGGAGTCcccgtccg	x||||||||:x|||xxxxxxxx	tCAGTGCACTACAGaactttgt	NT5C1A
bta-miR-148a	ENSBTAT00000003895	ENSBTAG00000002993	96	117	-13.53	aGTCACGTCAacaagacctcac	x|||||||x|xxxxxxxxxxxx	tCAGTGCACTacagaactttgt	SFT2D1
bta-miR-148a	ENSBTAT00000003943	ENSBTAG00000003033	392	412	-13.03	cGTCACGT-ATGACgagttcag	x|||||||x|||x|xxxxxxxx	tCAGTGCACTACAGaactttgt	GADD45G
bta-miR-148a	ENSBTAT00000003961	ENSBTAG00000003044	1905	1925	-17.06	cGTCACGTG-TGACCTGtggag	x||||||||x||x|x||xxxxx	tCAGTGCACTACAGAACtttgt	SPIN1
bta-miR-148a	ENSBTAT00000004016	ENSBTAG00000003084	606	628	-13.88	tGTCACGTCGACGACcgctacgg	x|||||||x||x|x|xxxxxxxx	tCAGTGCA-CTACAGaactttgt	GPATCH2L
bta-miR-148a	ENSBTAT00000004101	ENSBTAG00000003147	852	875	-13.38	tGTCACGTTACATGTaccatataa	x|||||||x|xx|||xxxxxxxxx	tCAGTGCACT--ACAgaactttgt	JAK1
bta-miR-148a	ENSBTAT00000004174	ENSBTAG00000003215	3014	3036	-23.2	tGTCACGTTCTGTTGTTGGAAcg	x|||||||xx|||:x|||:||xx	tCAGTGCACTACAG-AACTTTgt	KIF3B
bta-miR-148a	ENSBTAT00000004198	ENSBTAG00000003238	421	442	-13.56	aGTCACGTTCGCTCTCGtttat	x|||||||xxxx|||x|xxxxx	tCAGTGCACTACAGAACtttgt	MEOX2
bta-miR-148a	ENSBTAT00000004256	ENSBTAG00000003282	1180	1201	-20.35	gGTCACGTGATcggggttcgta	x||||||||||xxxxxxxxxxx	tCAGTGCACTAcagaactttgt	SLCO1A2
bta-miR-148a	ENSBTAT00000004272	ENSBTAG00000003300	305	325	-11.82	cGTCACGTCCT-TCCTGtgccc	x|||||||xx|x||x||xxxxx	tCAGTGCACTACAGAACtttgt	MFGE8
bta-miR-148a	ENSBTAT00000004312	ENSBTAG00000003323	506	527	-13.53	aGTCACGTCAgagaagtagggc	x|||||||x|xxxxxxxxxxxx	tCAGTGCACTacagaactttgt	NOL6
bta-miR-148a	ENSBTAT00000004364	ENSBTAG00000003362	106	127	-12.92	tGTCACGTCTCCTCTTcccccg	x|||||||xxxx||||xxxxxx	tCAGTGCACTACAGAActttgt	HSP90B1
bta-miR-148a	ENSBTAT00000004370	ENSBTAG00000003369	513	534	-16.14	gGTCACGTCGAGGGTACAAcgg	x|||||||x:x|xx|xx||xxx	tCAGTGCACTACAGAACTTtgt	SYT12
bta-miR-148a	ENSBTAT00000004426	ENSBTAG00000003414	498	520	-14.24	cGTCACGTCGTAGAATTGtcggt	x|||||||x:|x|xx|||xxxxx	tCAGTGCACTA-CAGAACtttgt	SAXO2
bta-miR-148a	ENSBTAT00000004550	ENSBTAG00000003500	3716	3737	-18.2	gGTCACGTCCCTG-CTGGGAAga	x|||||||xxx||x||x|:||xx	tCAGTGCACT-ACAGAACTTTgt	DCAF7
bta-miR-148a	ENSBTAT00000004559	ENSBTAG00000003504	13	34	-19.02	cGTCACGTCAgcccgcccgggc	x|||||||x|xxxxxxxxxxxx	tCAGTGCACTacagaactttgt	GSS
bta-miR-148a	ENSBTAT00000004589	ENSBTAG00000003525	571	592	-15.2	gGTCACGTttggagagctctac	x|||||||xxxxxxxxxxxxxx	tCAGTGCActacagaactttgt	STXBP1
bta-miR-148a	ENSBTAT00000004671	ENSBTAG00000003594	873	894	-14.92	cGTCACGTCCTCTGTgtccaag	x|||||||xx|x|x|xxxxxxx	tCAGTGCACTACAGAactttgt	RIBC2
bta-miR-148a	ENSBTAT00000004825	ENSBTAG00000003702	1804	1824	-16.14	gGTCACGT-ATATTATGAAGaa	x|||||||x||x|:x||||:xx	tCAGTGCACTACAGAACTTTgt	ANGEL2
bta-miR-148a	ENSBTAT00000004836	ENSBTAG00000003711	1148	1169	-18.65	aGTCACGTGAacttcccgaccg	x|||||||||xxxxxxxxxxxx	tCAGTGCACTacagaactttgt	EPAS1
bta-miR-148a	ENSBTAT00000004844	ENSBTAG00000003721	423	448	-21.45	tGTCACGTTTTTGATGGTATGGGAct	x|||||||xxxx||||x:x||::|xx	tCAGTGCA----CTACAGAACTTTgt	CHST1
bta-miR-148a	ENSBTAT00000004861	ENSBTAG00000003733	189	210	-20.48	#NAME?	x||||||||:|x|||xxxxxxxx	tCAGTGCACTA-CAGaactttgt	TM4SF5
bta-miR-148a	ENSBTAT00000004955	ENSBTAG00000003807	105	126	-17.65	gGTCACGTCAAGTCGTAActcc	x|||||||x|x|||x|x|xxxx	tCAGTGCACTACAGAACTttgt	CNOT9
bta-miR-148a	ENSBTAT00000005009	ENSBTAG00000003840	654	677	-15.85	tGTCACGTTTCCTGTCGTAAAAtc	x|||||||xxxx||||x|x|||xx	tCAGTGCACT--ACAGAACTTTgt	GUCY1B1
bta-miR-148a	ENSBTAT00000005022	ENSBTAG00000003850	178	200	-14.87	tGTCACGTAAATGgaaccgtttc	x|||||||x|x||xxxxxxxxxx	tCAGTGCACT-ACagaactttgt	INSL5
bta-miR-148a	ENSBTAT00000005042	ENSBTAG00000003865	135	156	-15.27	cGTCACGTTGAT-TCaaggttcg	x|||||||x|||x||xxxxxxxx	tCAGTGCA-CTACAGaactttgt	CASR
bta-miR-148a	ENSBTAT00000005088	ENSBTAG00000003898	84	105	-15.11	gGTCACGTTAgataaatggtcg	x|||||||x|xxxxxxxxxxxx	tCAGTGCACTacagaactttgt	HMGCS2
bta-miR-148a	ENSBTAT00000005094	ENSBTAG00000003901	88	109	-29.46	aGTCACGTGGTGTTTTGTAGaa	x||||||||:|||:|||x|:xx	tCAGTGCACTACAGAACTTTgt	DNMT3B
bta-miR-148a	ENSBTAT00000005164	ENSBTAG00000003961	1006	1027	-16.91	aGTCACGTCAAGTCacttacga	x|||||||x|x|||xxxxxxxx	tCAGTGCACTACAGaactttgt	SNX20
bta-miR-148a	ENSBTAT00000005174	ENSBTAG00000003967	755	775	-12.93	cGTCACGTC-TGTgacaccggg	x|||||||xx|||xxxxxxxxx	tCAGTGCACTACAgaactttgt	OTUB1
bta-miR-148a	ENSBTAT00000005182	ENSBTAG00000003971	294	316	-24.36	aGTCACGTGCGTGTCTACACAag	x||||||||x:|||||xx|x|xx	tCAGTGCAC-TACAGAACTTTgt	E2F1
bta-miR-148a	ENSBTAT00000005195	ENSBTAG00000003975	43	65	-19.46	aGTCACGTCGAGGggggcgtgcg	x|||||||x||x|xxxxxxxxxx	tCAGTGCA-CTACagaactttgt	LMAN2L
bta-miR-148a	ENSBTAT00000005226	ENSBTAG00000004004	1370	1392	-21.36	gGTCACGTAGGAT-TGTCGAGAcc	x|||||||xx|||x|x|x||:|xx	tCAGTGCA--CTACAGAACTTTgt	CSDC2
bta-miR-148a	ENSBTAT00000005255	ENSBTAG00000004023	284	305	-15.91	cGTCACGTGACCACCCGAAttg	x|||||||||xxx|xx|||xxx	tCAGTGCACTACAGAACTTtgt	ELAPOR2
bta-miR-148a	ENSBTAT00000005328	ENSBTAG00000004078	35	53	-24.09	cGTCACGTGA---CTTGGGAcc	x|||||||||xxx||||::|xx	tCAGTGCACTACAGAACTTTgt	KCNH2
bta-miR-148a	ENSBTAT00000005329	ENSBTAG00000004079	2303	2328	-14.26	tGTCACGTAAATCCCGTCATGTGAtt	x|||||||x|x|xxx|||x||x:|xx	tCAGTGCACT-A---CAGAACTTTgt	ZNF106
bta-miR-148a	ENSBTAT00000005354	ENSBTAG00000004098	142	168	-23.88	gGTCACGTGGATCGGGGTTTTGttaca	x||||||||x||xxxx||:|||xxxxx	tCAGTGCAC-TA----CAGAACtttgt	ARMT1
bta-miR-148a	ENSBTAT00000005381	ENSBTAG00000004119	303	324	-12.02	tGTCACGTccttaacccttacc	x|||||||xxxxxxxxxxxxxx	tCAGTGCActacagaactttgt	NEUROD2
bta-miR-148a	ENSBTAT00000005412	ENSBTAG00000004135	289	311	-18.56	tGTCACGTTAATGTCTTtcgtta	x|||||||x|x||||||xxxxxx	tCAGTGCACT-ACAGAActttgt	LMTK2
bta-miR-148a	ENSBTAT00000005549	ENSBTAG00000004237	1998	2019	-13.89	gGTCACGTACTTTCacttttca	x|||||||xx|x||xxxxxxxx	tCAGTGCACTACAGaactttgt	BTC
bta-miR-148a	ENSBTAT00000005611	ENSBTAG00000004271	35	56	-13.56	aGTCACGTttaaatatgtgtgt	x|||||||xxxxxxxxxxxxxx	tCAGTGCActacagaactttgt	UBAP2L
bta-miR-148a	ENSBTAT00000005667	ENSBTAG00000004328	935	956	-16.52	tGTCACGTGActagaccgctac	x|||||||||xxxxxxxxxxxx	tCAGTGCACTacagaactttgt	CHST10
bta-miR-148a	ENSBTAT00000005680	ENSBTAG00000004337	587	608	-12.21	cGTCACGTccagaccccatgtc	x|||||||xxxxxxxxxxxxxx	tCAGTGCActacagaactttgt	PDE1B
bta-miR-148a	ENSBTAT00000005725	ENSBTAG00000004364	228	251	-22.22	cGTCACGTGGGGGTCGTTGTAGat	x||||||||:x|x||x|||x|:xx	tCAGTGCACTAC-AG-AACTTTgt	THNSL2
bta-miR-148a	ENSBTAT00000005793	ENSBTAG00000005150	500	522	-16.81	tGTCACGTGCGGGACTCGAtgtc	x||||||||x:x|x||x||xxxx	tCAGTGCAC-TACAGAACTttgt	HMGB3
bta-miR-148a	ENSBTAT00000005808	ENSBTAG00000004430	660	678	-20.38	tGTCACGTG---TCTTGAcctt	x||||||||xxx||||||xxxx	tCAGTGCACTACAGAACTttgt	SGPP1
bta-miR-148a	ENSBTAT00000005857	ENSBTAG00000004463	523	544	-13.22	gGTCACGTtttcaaaccccccg	x|||||||xxxxxxxxxxxxxx	tCAGTGCActacagaactttgt	KDELR1
bta-miR-148a	ENSBTAT00000005861	ENSBTAG00000004464	152	174	-13.69	tGTCACGTCTTAGACTccctgtt	x|||||||xx|x|x||xxxxxxx	tCAGTGCACTA-CAGAactttgt	HROB
bta-miR-148a	ENSBTAT00000005894	ENSBTAG00000004495	1258	1279	-13.89	gGTCACGTacaaataatcagag	x|||||||xxxxxxxxxxxxxx	tCAGTGCActacagaactttgt	UBA5
bta-miR-148a	ENSBTAT00000005959	ENSBTAG00000004532	127	148	-18.27	gGTCACGTGACATGTATAAtgt	x|||||||||xx|x|xx||xxx	tCAGTGCACTACAGAACTTtgt	FGFR1OP2
bta-miR-148a	ENSBTAT00000005975	ENSBTAG00000004547	750	771	-15.89	aGTCACGTTAAGTTTTAAAGtt	x|||||||x|x||:||x||:xx	tCAGTGCACTACAGAACTTTgt	OLR1
bta-miR-148a	ENSBTAT00000005993	ENSBTAG00000004562	258	279	-12.16	cGTCACGTT-TGAATAAGAGAgg	x|||||||xx||xx|xx||:|xx	tCAGTGCACTACAGAA-CTTTgt	CD207
bta-miR-148a	ENSBTAT00000006041	ENSBTAG00000004603	789	810	-12.28	tGTCACGTCCTTTCCCGAcgtc	x|||||||xx|x||xx||xxxx	tCAGTGCACTACAGAACTttgt	PHC2
bta-miR-148a	ENSBTAT00000006085	ENSBTAG00000004639	216	239	-19.39	aGTCACGT-ATCGTCCCTTGACAac	x|||||||x||x|||xx||||x|xx	tCAGTGCACTA-CAG--AACTTTgt	HARBI1
bta-miR-148a	ENSBTAT00000006190	ENSBTAG00000025313	58	79	-19.61	gGTCACGTTTTGTCagggtcgt	x|||||||xx||||xxxxxxxx	tCAGTGCACTACAGaactttgt	DYNLL2
bta-miR-148a	ENSBTAT00000006197	ENSBTAG00000006657	1958	1976	-13.57	cGTCACGTC---TCTGGAcgtc	x|||||||xxxx|||x||xxxx	tCAGTGCACTACAGAACTttgt	ZDHHC8
bta-miR-148a	ENSBTAT00000006219	ENSBTAG00000004738	585	606	-17.28	gGTCACGTCAccctcccgggcc	x|||||||x|xxxxxxxxxxxx	tCAGTGCACTacagaactttgt	LRRC47
bta-miR-148a	ENSBTAT00000006236	ENSBTAG00000004580	696	717	-17.07	tGTCACGTCGGT-TCTCGGAtct	x|||||||x|:|x|||x|:|xxx	tCAGTGCA-CTACAGAACTTtgt	MS4A1
bta-miR-148a	ENSBTAT00000006274	ENSBTAG00000004776	160	182	-19.3	aGTCACGTCGAGGTCGGTAAGga	x|||||||x||x|||xxx||:xx	tCAGTGCA-CTACAGAACTTTgt	DUSP23
bta-miR-148a	ENSBTAT00000006305	ENSBTAG00000004802	1015	1038	-19.1	aGTCACGTCTGCGGTCcgccccgc	x|||||||xx|xx|||xxxxxxxx	tCAGTGCA--CTACAGaactttgt	CEP170B
bta-miR-148a	ENSBTAT00000006361	ENSBTAG00000004842	462	484	-12.45	cGTCACGTCATAGGTACGAAttc	x|||||||x||x|x:xx|||xxx	tCAGTGCACTA-CAGAACTTtgt	RSPRY1
bta-miR-148a	ENSBTAT00000006518	ENSBTAG00000004956	1198	1217	-14.23	aGTCACGT-A-GCCTTcctctg	x|||||||x|x|x|||xxxxxx	tCAGTGCACTACAGAActttgt	CHEK2
bta-miR-148a	ENSBTAT00000006572	ENSBTAG00000004995	11	33	-14.66	aGTCACGTTACGATCCGTAAAat	x|||||||x|x|x||xxx|||xx	tCAGTGCACTAC-AGAACTTTgt	C1GALT1
bta-miR-148a	ENSBTAT00000006638	ENSBTAG00000005034	94	115	-13.56	aGTCACGTttccacccttttcc	x|||||||xxxxxxxxxxxxxx	tCAGTGCActacagaactttgt	CAPN5
bta-miR-148a	ENSBTAT00000006673	ENSBTAG00000005063	863	884	-15.71	aGTCACGTCCTTCTTTGAttgt	x|||||||xx|xx:||||xxxx	tCAGTGCACTACAGAACTttgt	THEM6
bta-miR-148a	ENSBTAT00000006763	ENSBTAG00000005129	207	228	-12.05	tGTCACGTtttacaaccgccag	x|||||||xxxxxxxxxxxxxx	tCAGTGCActacagaactttgt	CEP55
bta-miR-148a	ENSBTAT00000006775	ENSBTAG00000032068	106	128	-14.38	aGTCACGTCCAAGGTTTctctac	x|||||||xx|x|x:||xxxxxx	tCAGTGCAC-TACAGAActttgt	PLA2G4F
bta-miR-148a	ENSBTAT00000006803	ENSBTAG00000005160	635	656	-13.56	aGTCACGTTATaaataacaaag	x|||||||x||xxxxxxxxxxx	tCAGTGCACTAcagaactttgt	GTF2H1
bta-miR-148a	ENSBTAT00000006890	ENSBTAG00000005234	1680	1701	-13.2	tGTCACGTCGAATCacgttttc	x|||||||x:xx||xxxxxxxx	tCAGTGCACTACAGaactttgt	LYPD1
bta-miR-148a	ENSBTAT00000006892	ENSBTAG00000005236	974	995	-13.18	tGTCACGTAATTTTccaggctg	x|||||||x||x|:xxxxxxxx	tCAGTGCACTACAGaactttgt	CCKBR
bta-miR-148a	ENSBTAT00000006918	ENSBTAG00000005259	179	200	-18.34	aGTCACGTTTTGTTTCCACAag	x|||||||xx|||:|xx|x|xx	tCAGTGCACTACAGAACTTTgt	UCP3
bta-miR-148a	ENSBTAT00000006948	ENSBTAG00000043981	822	843	-14.12	aGTCACGTtcaccgacaaaaca	x|||||||xxxxxxxxxxxxxx	tCAGTGCActacagaactttgt	SBF2
bta-miR-148a	ENSBTAT00000006974	ENSBTAG00000005300	418	442	-15.79	tGTCACGTCCTGAGGTCcctctttc	x|||||||xxx||x|||xxxxxxxx	tCAGTGCA---CTACAGaactttgt	TMEM51
bta-miR-148a	ENSBTAT00000007260	ENSBTAG00000005519	117	135	-12.05	tGTCACGT--T-TCTTtccagg	x|||||||xx|x||||xxxxxx	tCAGTGCACTACAGAActttgt	RNF38
bta-miR-148a	ENSBTAT00000007351	ENSBTAG00000032137	165	186	-14.75	aGTCACGTCACGACGGGGAGgg	x|||||||x|x|x|xx|:|:xx	tCAGTGCACTACAGAACTTTgt	PNPLA6
bta-miR-148a	ENSBTAT00000007371	ENSBTAG00000005615	146	169	-15.52	tGTCACGTTGTTCGTCCTGtccaa	x|||||||x:|xx|||x||xxxxx	tCAGTGCACTA--CAGAACtttgt	CEACAM1
bta-miR-148a	ENSBTAT00000007429	ENSBTAG00000005654	90	112	-14.22	tGTCACGTCGAacagcgagcaca	x|||||||x||xxxxxxxxxxxx	tCAGTGCA-CTacagaactttgt	TMSB10
bta-miR-148a	ENSBTAT00000007431	ENSBTAG00000005657	822	844	-14.44	cGTCACGTCGGGGACaaacctta	x|||||||x|:x|x|xxxxxxxx	tCAGTGCA-CTACAGaactttgt	CAMK2N2
bta-miR-148a	ENSBTAT00000007563	ENSBTAG00000005754	740	762	-13.26	cGTCACGTCCTCGGCGTCCAAgc	x|||||||xx|x|x|x|xx||xx	tCAGTGCACTA-CAGAACTTTgt	PPM1K
bta-miR-148a	ENSBTAT00000007616	ENSBTAG00000005793	992	1014	-16.2	aGTCACGTTGCCTTTGTGAcctc	x|||||||x:xx|:|x|||xxxx	tCAGTGCACTACAGA-ACTttgt	PEA15
bta-miR-148a	ENSBTAT00000007635	ENSBTAG00000005808	326	347	-11.51	cGTCACGTtccccgaacctccc	x|||||||xxxxxxxxxxxxxx	tCAGTGCActacagaactttgt	TMEM14C
bta-miR-148a	ENSBTAT00000007678	ENSBTAG00000005838	412	432	-16.28	gGTCACGTG-TCTCcctccact	x||||||||x|x||xxxxxxxx	tCAGTGCACTACAGaactttgt	ULK3
bta-miR-148a	ENSBTAT00000007743	ENSBTAG00000005892	1819	1841	-17.85	tGTCACGTGGAACCCTTcggtgt	x||||||||x|xxx|||xxxxxx	tCAGTGCAC-TACAGAActttgt	ZAP70
bta-miR-148a	ENSBTAT00000007796	ENSBTAG00000005938	486	507	-15.98	aGTCACGTttcaagagtcaatg	x|||||||xxxxxxxxxxxxxx	tCAGTGCActacagaactttgt	BARHL2
bta-miR-148a	ENSBTAT00000007861	ENSBTAG00000005990	265	287	-24.66	aGTCACGTTTTAGTTTTGAGGcc	x|||||||xx|x||:||||::xx	tCAGTGCACTA-CAGAACTTTgt	S1PR1
bta-miR-148a	ENSBTAT00000007865	ENSBTAG00000005994	112	132	-14.23	aGTCACGT-ATACTTTTAAAaa	x|||||||x||xx:||x|||xx	tCAGTGCACTACAGAACTTTgt	SPESP1
bta-miR-148a	ENSBTAT00000008078	ENSBTAG00000006140	756	777	-16.2	aGTCACGTAATGGATTtctgtg	x|||||||x|||xx||xxxxxx	tCAGTGCACTACAGAActttgt	PEX11A
bta-miR-148a	ENSBTAT00000008097	ENSBTAG00000006156	901	921	-15.02	tGTCACGTTAACTCT-GAGcga	x|||||||x|xx|||x||:xxx	tCAGTGCACTACAGAACTTtgt	BST1
bta-miR-148a	ENSBTAT00000008234	ENSBTAG00000006273	1014	1035	-16.28	gGTCACGTGtccccgccgctgt	x||||||||xxxxxxxxxxxxx	tCAGTGCACtacagaactttgt	SULT4A1
bta-miR-148a	ENSBTAT00000008243	ENSBTAG00000026993	695	716	-13.9	gGTCACGTttcagggttaagga	x|||||||xxxxxxxxxxxxxx	tCAGTGCActacagaactttgt	TMBIM4
bta-miR-148a	ENSBTAT00000008253	ENSBTAG00000022731	147	169	-14.65	cGTCACGTAAAAGTCGTTATAct	x|||||||x|xx|||x|x|x|xx	tCAGTGCACTA-CAGAACTTTgt	SSR1
bta-miR-148a	ENSBTAT00000008254	ENSBTAG00000006288	516	540	-19.89	aGTCACGTAGATGAATTTTGttctc	x|||||||x||||xx|:|||xxxxx	tCAGTGCA-CTAC--AGAACtttgt	VSTM4
bta-miR-148a	ENSBTAT00000008298	ENSBTAG00000006326	1152	1173	-14.64	gGTCACGTtccacgaaatgatt	x|||||||xxxxxxxxxxxxxx	tCAGTGCActacagaactttgt	ALDH1L2
bta-miR-148a	ENSBTAT00000008338	ENSBTAG00000034693	1543	1564	-11.41	cGTCACGTCATcctcccttacc	x|||||||x||xxxxxxxxxxx	tCAGTGCACTAcagaactttgt	SYT1
bta-miR-148a	ENSBTAT00000008386	ENSBTAG00000006396	53	74	-15.04	cGTCACGTctgagacccgtccg	x|||||||xxxxxxxxxxxxxx	tCAGTGCActacagaactttgt	GPI
bta-miR-148a	ENSBTAT00000008460	ENSBTAG00000006451	280	297	-12.6	tGTCACGT----TCTTAAAGgg	x|||||||xxxx||||x||:xx	tCAGTGCACTACAGAACTTTgt	GAP43
bta-miR-148a	ENSBTAT00000008486	ENSBTAG00000006471	58	80	-14.39	aGTCACGTTACTGaggtatgacc	x|||||||x|x||xxxxxxxxxx	tCAGTGCACT-ACagaactttgt	OSBPL11
bta-miR-148a	ENSBTAT00000008496	ENSBTAG00000006481	612	633	-15.85	tGTCACGTCGGGCCgaccccta	x|||||||x:x|x|xxxxxxxx	tCAGTGCACTACAGaactttgt	POLR1A
bta-miR-148a	ENSBTAT00000008535	ENSBTAG00000006511	221	245	-16.45	tGTCACGTCGGTTTGTCAAGTAAat	x|||||||x|:|xx|||xx|x||xx	tCAGTGCA-CTA--CAGAACTTTgt	MTF1
bta-miR-148a	ENSBTAT00000008607	ENSBTAG00000006550	189	210	-17.98	tGTCACGTGTTTTCTTtttgag	x||||||||x|x||||xxxxxx	tCAGTGCACTACAGAActttgt	GABARAPL2
bta-miR-148a	ENSBTAT00000008678	ENSBTAG00000006616	145	166	-16.23	gGTCACGTAGTtaggggtcagg	x|||||||x:|xxxxxxxxxxx	tCAGTGCACTAcagaactttgt	PTPN1
bta-miR-148a	ENSBTAT00000008714	ENSBTAG00000024983	902	923	-13.89	gGTCACGTACTTTCacttttca	x|||||||xx|x||xxxxxxxx	tCAGTGCACTACAGaactttgt	FBXO47
bta-miR-148a	ENSBTAT00000008812	ENSBTAG00000006697	1628	1649	-19.35	tGTCACGTGCAT-TCTTGttaag	x||||||||x||x|||||xxxxx	tCAGTGCAC-TACAGAACtttgt	RICTOR
bta-miR-148a	ENSBTAT00000008825	ENSBTAG00000031439	180	202	-14.23	aGTCACGTAAATCTCATCAGtaa	x|||||||x|x|x||x|x|:xxx	tCAGTGCACT-ACAGAACTTtgt	CDC14A
bta-miR-148a	ENSBTAT00000008858	ENSBTAG00000006738	407	428	-14.28	gGTCACGTAAacctgttcccag	x|||||||x|xxxxxxxxxxxx	tCAGTGCACTacagaactttgt	GPR68
bta-miR-148a	ENSBTAT00000008880	ENSBTAG00000006747	921	942	-14.23	aGTCACGTagccctccgacccc	x|||||||xxxxxxxxxxxxxx	tCAGTGCActacagaactttgt	LTBP3
bta-miR-148a	ENSBTAT00000008893	ENSBTAG00000006760	133	157	-11.54	cGTCACGTCGTTACCCGTAGAAAac	x|||||||x:|xx|xxx|x||||xx	tCAGTGCACTACAG---AACTTTgt	OTX1
bta-miR-148a	ENSBTAT00000008938	ENSBTAG00000006797	47	64	-15.62	gGTCACGTC----TTTGAAGgt	x|||||||xxxxx:|||||:xx	tCAGTGCACTACAGAACTTTgt	MARCHF3
bta-miR-148a	ENSBTAT00000009110	ENSBTAG00000006940	172	190	-14.36	aGTCACGTTA-GAC--GAAAta	x|||||||x|x|x|xx||||xx	tCAGTGCACTACAGAACTTTgt	USP48
bta-miR-148a	ENSBTAT00000009250	ENSBTAG00000007031	406	427	-16.41	aGTCACGTGCTtacaccgacct	x||||||||x|xxxxxxxxxxx	tCAGTGCACTAcagaactttgt	OXSM
bta-miR-148a	ENSBTAT00000009316	ENSBTAG00000007084	1363	1388	-16.34	cGTCACGTTTCCGACGTCAAGAAGtg	x|||||||xxxx||x|||xx|||:xx	tCAGTGCA----CTACAGAACTTTgt	MAP3K14
bta-miR-148a	ENSBTAT00000009341	ENSBTAG00000007101	37	57	-22.97	tGTCACGTCGTG-CTCGAGAcg	x|||||||x:||x||x||:|xx	tCAGTGCACTACAGAACTTTgt	F3
bta-miR-148a	ENSBTAT00000009364	ENSBTAG00000007116	866	885	-17.81	tGTCACGT--TGTTTTGtgttt	x|||||||xx|||:|||xxxxx	tCAGTGCACTACAGAACtttgt	ARRDC3
bta-miR-148a	ENSBTAT00000009392	ENSBTAG00000007137	829	850	-13.19	gGTCACGTCCTTTCacttttca	x|||||||xx|x||xxxxxxxx	tCAGTGCACTACAGaactttgt	RFC5
bta-miR-148a	ENSBTAT00000009461	ENSBTAG00000007189	1	22	-15.28	gGTCACGTTATATCcgacaagt	x|||||||x||x||xxxxxxxx	tCAGTGCACTACAGaactttgt	RCHY1
bta-miR-148a	ENSBTAT00000009483	ENSBTAG00000030286	26	44	-15.07	gGTCACGTC---TCCTGActcg	x|||||||xxxx||x|||xxxx	tCAGTGCACTACAGAACTttgt	GABRA1
bta-miR-148a	ENSBTAT00000009487	ENSBTAG00000007214	702	724	-14.98	cGTCACGTCGATTACTCGttggt	x|||||||x|||xx||x|xxxxx	tCAGTGCA-CTACAGAACtttgt	ELL2
bta-miR-148a	ENSBTAT00000009492	ENSBTAG00000007215	119	138	-13.07	cGTCACGT--TCTCGCGAAccc	x|||||||xx|x||xx|||xxx	tCAGTGCACTACAGAACTTtgt	RNPEPL1
bta-miR-148a	ENSBTAT00000009501	ENSBTAG00000007223	192	213	-18.38	gGTCACGTCCGGGTGTGGGAgt	x|||||||xxx|x:x||::|xx	tCAGTGCACTACAGAACTTTgt	FBXO2
bta-miR-148a	ENSBTAT00000009556	ENSBTAG00000007266	426	447	-17.06	aGTCACGTCATGTagtttctct	x|||||||x||||xxxxxxxxx	tCAGTGCACTACAgaactttgt	DDX55
bta-miR-148a	ENSBTAT00000009613	ENSBTAG00000007308	458	478	-15.64	cGTCACGTCG-GTCAAGAtgta	x|||||||x:x|||xx||xxxx	tCAGTGCACTACAGAACTttgt	EDC3
bta-miR-148a	ENSBTAT00000009677	ENSBTAG00000007356	480	498	-15.24	tGTCACGT--TGT-TTGAtttc	x|||||||xx|||x||||xxxx	tCAGTGCACTACAGAACTttgt	ELF1
bta-miR-148a	ENSBTAT00000009723	ENSBTAG00000007397	580	601	-13.78	gGTCACGTCATaaggacggacc	x|||||||x||xxxxxxxxxxx	tCAGTGCACTAcagaactttgt	FOLH1B
bta-miR-148a	ENSBTAT00000009775	ENSBTAG00000007435	111	134	-18.29	tGTCACGTCAGAAGTCTGGATAag	x|||||||xx||x||||x||x|xx	tCAGTGCA--CTACAGAACTTTgt	NOLC1
bta-miR-148a	ENSBTAT00000009846	ENSBTAG00000007485	853	874	-12.69	tGTCACGTctaaaggtttattg	x|||||||xxxxxxxxxxxxxx	tCAGTGCActacagaactttgt	GRHL1
bta-miR-148a	ENSBTAT00000009882	ENSBTAG00000000590	419	440	-14.42	gGTCACGTctcacatcctgtcg	x|||||||xxxxxxxxxxxxxx	tCAGTGCActacagaactttgt	POLE
bta-miR-148a	ENSBTAT00000009959	ENSBTAG00000007570	218	240	-15.53	aGTCACGTCGAccctgcccgagg	x|||||||x||xxxxxxxxxxxx	tCAGTGCA-CTacagaactttgt	NDUFAF6
bta-miR-148a	ENSBTAT00000009985	ENSBTAG00000007591	910	932	-18.3	aGTCACGTATATGGTTTGAtgta	x|||||||xx|||x:||||xxxx	tCAGTGCAC-TACAGAACTttgt	CHUK
bta-miR-148a	ENSBTAT00000009995	ENSBTAG00000007599	1103	1125	-13.89	gGTCACGTATTACACTTAAAGat	x|||||||xx|xxx|||x||:xx	tCAGTGCACTACA-GAACTTTgt	IKBKB
bta-miR-148a	ENSBTAT00000010002	ENSBTAG00000007608	1306	1323	-17.25	aGTCACGT----TTTTGGAGtc	x|||||||xxxx|:|||:|:xx	tCAGTGCACTACAGAACTTTgt	BMT2
bta-miR-148a	ENSBTAT00000010016	ENSBTAG00000007617	795	817	-16.95	gGTCACGTTCTGTGATTGtgtcg	x|||||||xx|||xx|||xxxxx	tCAGTGCACTACAG-AACtttgt	TERF2
bta-miR-148a	ENSBTAT00000010098	ENSBTAG00000007675	502	522	-16.57	tGTCACGTTC-GTTTAGAAcat	x|||||||xxx||:|x|||xxx	tCAGTGCACTACAGAACTTtgt	NPHP1
bta-miR-148a	ENSBTAT00000010129	ENSBTAG00000007704	708	730	-15.57	aGTCACGTTTTCTCATTGtcatt	x|||||||xx|x||x|||xxxxx	tCAGTGCACTACAG-AACtttgt	ELOVL7
bta-miR-148a	ENSBTAT00000010141	ENSBTAG00000007712	172	193	-13.25	tGTCACGTCAacaaaaggagag	x|||||||x|xxxxxxxxxxxx	tCAGTGCACTacagaactttgt	SEC22B
bta-miR-148a	ENSBTAT00000010206	ENSBTAG00000007763	90	111	-13.89	gGTCACGTAACGagccctccgc	x|||||||x|x|xxxxxxxxxx	tCAGTGCACTACagaactttgt	SLC1A4
bta-miR-148a	ENSBTAT00000010224	ENSBTAG00000007776	73	94	-17.44	aGTCACGTctccggccacggtg	x|||||||xxxxxxxxxxxxxx	tCAGTGCActacagaactttgt	BRPF1
bta-miR-148a	ENSBTAT00000010298	ENSBTAG00000007828	335	356	-18.08	gGTCACGTGAaagaacactctc	x|||||||||xxxxxxxxxxxx	tCAGTGCACTacagaactttgt	SLA
bta-miR-148a	ENSBTAT00000010318	ENSBTAG00000007843	57	78	-15.15	gGTCACGTCGTccagtcctacg	x|||||||x:|xxxxxxxxxxx	tCAGTGCACTAcagaactttgt	ITIH1
bta-miR-148a	ENSBTAT00000010347	ENSBTAG00000007865	306	329	-21.42	cGTCACGTGTACCATCTTGAAtga	x||||||||x|xxx|||||||xxx	tCAGTGCAC-TAC-AGAACTTtgt	GNPDA1
bta-miR-148a	ENSBTAT00000010364	ENSBTAG00000007880	482	504	-18.5	tGTCACGTCGAcccccaggggca	x|||||||x||xxxxxxxxxxxx	tCAGTGCA-CTacagaactttgt	RAB40C
bta-miR-148a	ENSBTAT00000010394	ENSBTAG00000040392	41	61	-15.6	gGTCACGT-ACCTCCCTAAGgt	x|||||||x|xx||xxx||:xx	tCAGTGCACTACAGAACTTTgt	MGC139164
bta-miR-148a	ENSBTAT00000010396	ENSBTAG00000007906	511	531	-16.9	aGTCACGTC-TCTTACGGAcgg	x|||||||xx|x|:xx|:|xxx	tCAGTGCACTACAGAACTTtgt	ZACN
bta-miR-148a	ENSBTAT00000010430	ENSBTAG00000007933	107	132	-16.55	aGTCACGTTCAAATAGTCGGTAAAcc	x|||||||xxxx||x|||xxx|||xx	tCAGTGCAC---TA-CAGAACTTTgt	DIPK2A
bta-miR-148a	ENSBTAT00000010491	ENSBTAG00000007979	243	264	-13.19	gGTCACGTctcaacattaacct	x|||||||xxxxxxxxxxxxxx	tCAGTGCActacagaactttgt	TNPO1
bta-miR-148a	ENSBTAT00000010500	ENSBTAG00000022960	533	554	-15.11	tGTCACGTGtccgataaatata	x||||||||xxxxxxxxxxxxx	tCAGTGCACtacagaactttgt	HEPHL1
bta-miR-148a	ENSBTAT00000010553	ENSBTAG00000008025	811	832	-16.4	cGTCACGTttccgcgtcgcggt	x|||||||xxxxxxxxxxxxxx	tCAGTGCActacagaactttgt	UBE3C
bta-miR-148a	ENSBTAT00000010671	ENSBTAG00000008115	859	879	-18.65	aGTCACGT-ATACACTGAGAct	x|||||||x||xxxx|||:|xx	tCAGTGCACTACAGAACTTTgt	TNFAIP1
bta-miR-148a	ENSBTAT00000010685	ENSBTAG00000008127	344	369	-16.23	gGTCACGTACTTCGACTCACGAAAga	x|||||||xx|xx|x||xxx||||xx	tCAGTGCACTA--CAGAA--CTTTgt	RBP5
bta-miR-148a	ENSBTAT00000010709	ENSBTAG00000008148	8	29	-15.94	cGTCACGTGTTCCCAAGActaa	x||||||||x|xx|xx||xxxx	tCAGTGCACTACAGAACTttgt	GCM1
bta-miR-148a	ENSBTAT00000010762	ENSBTAG00000008182	2145	2166	-16.35	tGTCACGTCTTGgtgctcctcc	x|||||||xx||xxxxxxxxxx	tCAGTGCACTACagaactttgt	FOSB
bta-miR-148a	ENSBTAT00000010773	ENSBTAG00000008190	864	885	-19.85	tGTCACGTGACGggtcccccag	x|||||||||x|xxxxxxxxxx	tCAGTGCACTACagaactttgt	SUMF2
bta-miR-148a	ENSBTAT00000010780	ENSBTAG00000008195	285	308	-27.31	cGTCACGTGACAGTCATTGAGAcc	x|||||||||xx|||x||||:|xx	tCAGTGCACTA-CAG-AACTTTgt	PHKG1
bta-miR-148a	ENSBTAT00000010988	ENSBTAG00000008341	991	1013	-12.47	cGTCACGTTGATTTATACAAAac	x|||||||x|||x|x|xx|||xx	tCAGTGCA-CTACAGAACTTTgt	ARSB
bta-miR-148a	ENSBTAT00000011024	ENSBTAG00000008374	271	294	-21.61	gGTCACGTGAACGCGTCCGAGAgc	x|||||||||xxx|x|xx||:|xx	tCAGTGCACTACAGAA--CTTTgt	AQP2
bta-miR-148a	ENSBTAT00000011032	ENSBTAG00000008380	439	460	-11.41	cGTCACGTccctacccccctgt	x|||||||xxxxxxxxxxxxxx	tCAGTGCActacagaactttgt	ITGA11
bta-miR-148a	ENSBTAT00000011083	ENSBTAG00000008424	676	697	-14.81	aGTCACGTtcagacagaggaac	x|||||||xxxxxxxxxxxxxx	tCAGTGCActacagaactttgt	ABR
bta-miR-148a	ENSBTAT00000011125	ENSBTAG00000008453	86	108	-13.76	aGTCACGTTACTTTCTTCCAAgt	x|||||||x|x|x||||xx||xx	tCAGTGCACT-ACAGAACTTTgt	LBR
bta-miR-148a	ENSBTAT00000011240	ENSBTAG00000008527	1525	1545	-13.69	cGTCACGTC-TGAACGGAGAaa	x|||||||xx||xxxx||:|xx	tCAGTGCACTACAGAACTTTgt	SRSF6
bta-miR-148a	ENSBTAT00000011312	ENSBTAG00000008578	357	377	-18.44	aGTCACGTT-TGTCgactttta	x|||||||xx||||xxxxxxxx	tCAGTGCACTACAGaactttgt	LSM4
bta-miR-148a	ENSBTAT00000011314	ENSBTAG00000008579	40	61	-15.05	gGTCACGTtcacctgtacggtc	x|||||||xxxxxxxxxxxxxx	tCAGTGCActacagaactttgt	RCC2
bta-miR-148a	ENSBTAT00000011354	ENSBTAG00000008607	372	393	-12.02	tGTCACGTccctacatactcca	x|||||||xxxxxxxxxxxxxx	tCAGTGCActacagaactttgt	ARID3A
bta-miR-148a	ENSBTAT00000011392	ENSBTAG00000008638	466	493	-18.05	cGTCACGTCTGAGGATGGTCAGGGAAga	x|||||||xxxxx||||x||xx|:||xx	tCAGTGCA-----CTAC-AGAACTTTgt	FAM110A
bta-miR-148a	ENSBTAT00000011536	ENSBTAG00000008756	180	206	-21.71	gGTCACGTGTCAGTGGAGTTTGAGGtc	x||||||||xxx:||xxx:||||::xx	tCAGTGCAC---TACA--GAACTTTgt	ELF3
bta-miR-148a	ENSBTAT00000011581	ENSBTAG00000008789	206	227	-12.72	tGTCACGTaccacccacccaaa	x|||||||xxxxxxxxxxxxxx	tCAGTGCActacagaactttgt	HMG20B
bta-miR-148a	ENSBTAT00000011609	ENSBTAG00000008816	795	818	-14.87	gGTCACGTAATTGGACCTCAAttg	x|||||||x||xx|x|x|x||xxx	tCAGTGCACTA--CAGAACTTtgt	TRIM2
bta-miR-148a	ENSBTAT00000011671	ENSBTAG00000008863	117	137	-17.43	gGTCACGTGTT-TCTAGttcct	x||||||||x|x|||x|xxxxx	tCAGTGCACTACAGAACtttgt	TMEM87A
bta-miR-148a	ENSBTAT00000011735	ENSBTAG00000008916	931	952	-14.13	cGTCACGTacagaccggtcatc	x|||||||xxxxxxxxxxxxxx	tCAGTGCActacagaactttgt	CYFIP2
bta-miR-148a	ENSBTAT00000011740	ENSBTAG00000008920	3070	3089	-16.75	cGTCACGT--TGTCTaccacat	x|||||||xx|||||xxxxxxx	tCAGTGCACTACAGAactttgt	ATP1B4
bta-miR-148a	ENSBTAT00000011767	ENSBTAG00000008938	315	336	-16.07	gGTCACGTGccccacccgactc	x||||||||xxxxxxxxxxxxx	tCAGTGCACtacagaactttgt	SRC
bta-miR-148a	ENSBTAT00000011782	ENSBTAG00000008950	726	747	-14.23	aGTCACGTATTCTTTTcgtagt	x|||||||xx|x|:||xxxxxx	tCAGTGCACTACAGAActttgt	TRMT9B
bta-miR-148a	ENSBTAT00000011824	ENSBTAG00000008985	970	991	-13.56	aGTCACGTttcacggaccgttc	x|||||||xxxxxxxxxxxxxx	tCAGTGCActacagaactttgt	PCBP1
bta-miR-148a	ENSBTAT00000011866	ENSBTAG00000009014	1012	1032	-18.2	cGTCACGTGTT-TAGTGGGAtt	x||||||||x|x|xx||::|xx	tCAGTGCACTACAGAACTTTgt	UPK1B
bta-miR-148a	ENSBTAT00000011920	ENSBTAG00000009047	129	152	-12.72	tGTCACGTACGTTATTTTatatac	x|||||||xx|x|x|:||xxxxxx	tCAGTGCA--CTACAGAActttgt	YPEL3
bta-miR-148a	ENSBTAT00000011931	ENSBTAG00000009055	353	374	-12.11	cGTCACGTAAataatatggttc	x|||||||x|xxxxxxxxxxxx	tCAGTGCACTacagaactttgt	RNF144B
bta-miR-148a	ENSBTAT00000011952	ENSBTAG00000009067	189	209	-14.59	tGTCACGTT-TGTTcaccttgt	x|||||||xx|||:xxxxxxxx	tCAGTGCACTACAGaactttgt	DDX6
bta-miR-148a	ENSBTAT00000011991	ENSBTAG00000009097	201	225	-16.05	cGTCACGTCCGAGGATTTTGAGtcc	x|||||||xx||x|x|:||||:xxx	tCAGTGCA--CTAC-AGAACTTtgt	FANCI
bta-miR-148a	ENSBTAT00000012030	ENSBTAG00000009125	1040	1061	-15.35	aGTCACGTCACGAATTcggtga	x|||||||x|x|xx||xxxxxx	tCAGTGCACTACAGAActttgt	ALDH1A3
bta-miR-148a	ENSBTAT00000012081	ENSBTAG00000009165	409	430	-16.01	tGTCACGTccgaggagtcctcc	x|||||||xxxxxxxxxxxxxx	tCAGTGCActacagaactttgt	LPIN3
bta-miR-148a	ENSBTAT00000012101	ENSBTAG00000009183	304	325	-14.82	tGTCACGTaggacgggtgtgtt	x|||||||xxxxxxxxxxxxxx	tCAGTGCActacagaactttgt	SHISA5
bta-miR-148a	ENSBTAT00000012163	ENSBTAG00000040065	392	413	-16.96	aGTCACGTCTTTGCAGGGAccc	x|||||||xx|xx|xx|:|xxx	tCAGTGCACTACAGAACTTtgt	RAD51AP1
bta-miR-148a	ENSBTAT00000012189	ENSBTAG00000009251	80	101	-15.78	tGTCACGTTCAGTCagccagcg	x|||||||xxx|||xxxxxxxx	tCAGTGCACTACAGaactttgt	SZRD1
bta-miR-148a	ENSBTAT00000012238	ENSBTAG00000009289	304	325	-14.23	aGTCACGTAAaaataatttact	x|||||||x|xxxxxxxxxxxx	tCAGTGCACTacagaactttgt	MS4A8
bta-miR-148a	ENSBTAT00000012281	ENSBTAG00000009328	776	799	-20.91	gGTCACGTGTCGTTAATAGAActa	x||||||||xx||:xx|x|||xxx	tCAGTGCACTACAG--AACTTtgt	NWD1
bta-miR-148a	ENSBTAT00000012303	ENSBTAG00000009346	378	399	-12.02	tGTCACGTC-TCTCCTTTAtgtg	x|||||||xx|x||x||x|xxxx	tCAGTGCACTACAG-AACTttgt	MAPKAPK5
bta-miR-148a	ENSBTAT00000012324	ENSBTAG00000009364	25	45	-13.89	gGTCACGT-ACCTCCCTAAGac	x|||||||x|xx||xxx||:xx	tCAGTGCACTACAGAACTTTgt	-
bta-miR-148a	ENSBTAT00000012349	ENSBTAG00000007187	809	830	-16.77	cGTCACGTtccccgggtgtccc	x|||||||xxxxxxxxxxxxxx	tCAGTGCActacagaactttgt	-
bta-miR-148a	ENSBTAT00000012410	ENSBTAG00000009431	2411	2432	-16.65	tGTCACGTTGTCACTTACAAgc	x|||||||x:|xx|||xx||xx	tCAGTGCACTACAGAACTTTgt	SLC25A44
bta-miR-148a	ENSBTAT00000012587	ENSBTAG00000009569	141	161	-22.49	aGTCACGTG-TGTCTcctcttg	x||||||||x|||||xxxxxxx	tCAGTGCACTACAGAactttgt	DOCK6
bta-miR-148a	ENSBTAT00000012636	ENSBTAG00000009602	665	686	-16.89	tGTCACGTccccacgggagacc	x|||||||xxxxxxxxxxxxxx	tCAGTGCActacagaactttgt	TMEM120B
bta-miR-148a	ENSBTAT00000012640	ENSBTAG00000039195	170	192	-17.99	tGTCACGTCGATGACTTtttgta	x|||||||x||||x|||xxxxxx	tCAGTGCA-CTACAGAActttgt	NHS
bta-miR-148a	ENSBTAT00000012722	ENSBTAG00000009655	558	581	-24.41	gGTCACGTGGTAAGTCTGGAccat	x||||||||:|xx||||x||xxxx	tCAGTGCACTA--CAGAACTttgt	TNS3
bta-miR-148a	ENSBTAT00000012785	ENSBTAG00000009694	1498	1519	-12.11	cGTCACGTacccgaagagtatc	x|||||||xxxxxxxxxxxxxx	tCAGTGCActacagaactttgt	PUS10
bta-miR-148a	ENSBTAT00000012897	ENSBTAG00000046797	33	58	-20.46	aGTCACGTCGAACTGTCACCGAGAaa	x|||||||x||xx||||xxx||:|xx	tCAGTGCA-CT--ACAGAA-CTTTgt	NRAS
bta-miR-148a	ENSBTAT00000012932	ENSBTAG00000009806	109	131	-18.98	aGTCACGTCGACTTCTTAAAtgt	x|||||||x||xx||||x||xxx	tCAGTGCA-CTACAGAACTTtgt	INVS
bta-miR-148a	ENSBTAT00000013069	ENSBTAG00000009904	524	546	-14.59	tGTCACGTCGGTTTTTTttttaa	x|||||||x|:|x|:||xxxxxx	tCAGTGCA-CTACAGAActttgt	SPIC
bta-miR-148a	ENSBTAT00000013073	ENSBTAG00000009907	864	885	-13.89	gGTCACGTACTTTCacttttca	x|||||||xx|x||xxxxxxxx	tCAGTGCACTACAGaactttgt	MAPK4
bta-miR-148a	ENSBTAT00000013112	ENSBTAG00000009939	30	51	-14.7	aGTCACGTAGTATaccagtcac	x|||||||x:|x|xxxxxxxxx	tCAGTGCACTACAgaactttgt	CAND1
bta-miR-148a	ENSBTAT00000013117	ENSBTAG00000009942	1193	1218	-15.31	tGTCACGTCTAGGGTGTATCAATAgg	x|||||||xxxx|:|||x|xx|x|xx	tCAGTGCA----CTACAGAACTTTgt	PLCL2
bta-miR-148a	ENSBTAT00000013127	ENSBTAG00000009951	1656	1675	-15.24	tGTCACGT--TGTCcccactcc	x|||||||xx||||xxxxxxxx	tCAGTGCACTACAGaactttgt	PGP
bta-miR-148a	ENSBTAT00000013177	ENSBTAG00000009995	1187	1205	-19.01	tGTCACGTTTTGT---GAAAcg	x|||||||xx|||xxx||||xx	tCAGTGCACTACAGAACTTTgt	CPEB4
bta-miR-148a	ENSBTAT00000013179	ENSBTAG00000009995	2364	2385	-18.41	gGTCACGTGTTGTaagtattaa	x||||||||x|||xxxxxxxxx	tCAGTGCACTACAgaactttgt	CPEB4
bta-miR-148a	ENSBTAT00000013186	ENSBTAG00000009998	1369	1390	-13.24	tGTCACGT-ATATACGTGtgtgt	x|||||||x||x|x|x||xxxxx	tCAGTGCACTACA-GAACtttgt	GALNT16
bta-miR-148a	ENSBTAT00000013214	ENSBTAG00000010018	25	46	-16.65	aGTCACGTCCTGTTGTagtaga	x|||||||xx|||:x|xxxxxx	tCAGTGCACTACAGAActttgt	ATP7A
bta-miR-148a	ENSBTAT00000013298	ENSBTAG00000032603	43	60	-14.94	tGTCACGT----TTTTGATAac	x|||||||xxxx|:||||x|xx	tCAGTGCACTACAGAACTTTgt	-
bta-miR-148a	ENSBTAT00000013440	ENSBTAG00000010179	195	215	-11.91	cGTCACGTC-TCTTTgccctgg	x|||||||xx|x|:|xxxxxxx	tCAGTGCACTACAGAactttgt	COL5A3
bta-miR-148a	ENSBTAT00000013457	ENSBTAG00000034875	535	556	-12.94	cGTCACGTCCTCTCGTCAGtta	x|||||||xx|x||x|x|:xxx	tCAGTGCACTACAGAACTTtgt	ALPK1
bta-miR-148a	ENSBTAT00000013571	ENSBTAG00000010273	18	39	-12.11	cGTCACGTAAGGACGGGTAttc	x|||||||x|x|x|xx|x|xxx	tCAGTGCACTACAGAACTTtgt	EREG
bta-miR-148a	ENSBTAT00000013576	ENSBTAG00000010278	208	229	-13.53	aGTCACGTcccagccccgcccc	x|||||||xxxxxxxxxxxxxx	tCAGTGCActacagaactttgt	STPG1
bta-miR-148a	ENSBTAT00000013608	ENSBTAG00000010303	636	656	-12.3	cGTCACGT-ATcgggattatca	x|||||||x||xxxxxxxxxxx	tCAGTGCACTAcagaactttgt	ICAM1
bta-miR-148a	ENSBTAT00000013612	ENSBTAG00000010299	1183	1203	-21.3	aGTCACGTGTT-TCTTGtggta	x||||||||x|x|||||xxxxx	tCAGTGCACTACAGAACtttgt	NOL4
bta-miR-148a	ENSBTAT00000013664	ENSBTAG00000010345	2364	2385	-17.14	gGTCACGTGCACGG-TTGTAAtg	x||||||||x|x|xx|||x||xx	tCAGTGCAC-TACAGAACTTTgt	XPNPEP2
bta-miR-148a	ENSBTAT00000013671	ENSBTAG00000010356	925	946	-12.02	tGTCACGTCAAATTATtttcta	x|||||||x|xx|:x|xxxxxx	tCAGTGCACTACAGAActttgt	RAB12
bta-miR-148a	ENSBTAT00000013688	ENSBTAG00000010370	327	348	-15.35	gGTCACGTCCTGgaaggctccc	x|||||||xx||xxxxxxxxxx	tCAGTGCACTACagaactttgt	CLBA1
bta-miR-148a	ENSBTAT00000013708	ENSBTAG00000010380	844	865	-23.19	aGTCACGTTATGTCTgtcacgt	x|||||||x||||||xxxxxxx	tCAGTGCACTACAGAactttgt	INO80
bta-miR-148a	ENSBTAT00000013729	ENSBTAG00000010401	439	460	-11.44	cGTCACGTtcatcctagtcctt	x|||||||xxxxxxxxxxxxxx	tCAGTGCActacagaactttgt	UBE4B
bta-miR-148a	ENSBTAT00000013747	ENSBTAG00000010419	295	316	-14.39	cGTCACGTCCTCTgggtccaaa	x|||||||xx|x|xxxxxxxxx	tCAGTGCACTACAgaactttgt	CYP2R1
bta-miR-148a	ENSBTAT00000013790	ENSBTAG00000010444	926	949	-16.02	aGTCACGTTTTTGTTCTTctgtta	x|||||||xx|x||x|||xxxxxx	tCAGTGCACTA-CA-GAActttgt	ERBB3
bta-miR-148a	ENSBTAT00000013873	ENSBTAG00000010503	37	58	-13.22	gGTCACGTTATcgacaaccgtt	x|||||||x||xxxxxxxxxxx	tCAGTGCACTAcagaactttgt	TIMM9
bta-miR-148a	ENSBTAT00000014049	ENSBTAG00000010626	463	484	-15.36	cGTCACGTAGGGTCcccctgcc	x|||||||x:x|||xxxxxxxx	tCAGTGCACTACAGaactttgt	SH3GLB2
bta-miR-148a	ENSBTAT00000014072	ENSBTAG00000010645	1101	1122	-13.19	gGTCACGTCCTCTGTattttct	x|||||||xx|x|x|xxxxxxx	tCAGTGCACTACAGAactttgt	BOLA-DRA
bta-miR-148a	ENSBTAT00000014074	ENSBTAG00000010649	2977	3001	-14.96	gGTCACGTTAAATGAGATCGAAAaa	x|||||||x|xx||xxx|x||||xx	tCAGTGCACT--ACAGAA-CTTTgt	MEF2A
bta-miR-148a	ENSBTAT00000014090	ENSBTAG00000010653	1505	1526	-12.27	cGTCACGTacctgtacatttgt	x|||||||xxxxxxxxxxxxxx	tCAGTGCActacagaactttgt	MIGA2
bta-miR-148a	ENSBTAT00000014152	ENSBTAG00000010696	842	862	-13.12	tGTCACGTC-TGTacacgtccg	x|||||||xx|||xxxxxxxxx	tCAGTGCACTACAgaactttgt	DVL1
bta-miR-148a	ENSBTAT00000014200	ENSBTAG00000010727	234	257	-21.8	gGTCACGTTTGATGTCATGcctca	x|||||||xx||||||x||xxxxx	tCAGTGCA--CTACAGAACtttgt	ATG4D
bta-miR-148a	ENSBTAT00000014296	ENSBTAG00000010795	2096	2119	-13.37	gGTCACGTTTTATTACTTttggtt	x|||||||xx|x|xx|||xxxxxx	tCAGTGCACTACA--GAActttgt	ATG14
bta-miR-148a	ENSBTAT00000014364	ENSBTAG00000010828	16	36	-14.34	aGTCACGTC-TCTTTccagcca	x|||||||xx|x|:|xxxxxxx	tCAGTGCACTACAGAactttgt	-
bta-miR-148a	ENSBTAT00000014383	ENSBTAG00000010837	412	433	-14.14	cGTCACGTacactcgtccgtgt	x|||||||xxxxxxxxxxxxxx	tCAGTGCActacagaactttgt	HTR4
bta-miR-148a	ENSBTAT00000014415	ENSBTAG00000010863	1268	1289	-12.11	cGTCACGTAAaattaaccaatt	x|||||||x|xxxxxxxxxxxx	tCAGTGCACTacagaactttgt	DCP1A
bta-miR-148a	ENSBTAT00000014487	ENSBTAG00000010906	989	1012	-20.88	tGTCACGTCGGTGCTCGTGtcgcg	x|||||||x|:||x||x||xxxxx	tCAGTGCA-CTAC-AGAACtttgt	RPS6KA5
bta-miR-148a	ENSBTAT00000014572	ENSBTAG00000010977	1035	1056	-19.27	gGTCACGTGtccggacagcaag	x||||||||xxxxxxxxxxxxx	tCAGTGCACtacagaactttgt	FRZB
bta-miR-148a	ENSBTAT00000014594	ENSBTAG00000010989	473	494	-12.02	tGTCACGTCACGcagacccccg	x|||||||x|x|xxxxxxxxxx	tCAGTGCACTACagaactttgt	PIK3R1
bta-miR-148a	ENSBTAT00000014642	ENSBTAG00000011022	175	196	-20.74	aGTCACGTGACAATTTGAttag	x|||||||||xxx:||||xxxx	tCAGTGCACTACAGAACTttgt	ARPP19
bta-miR-148a	ENSBTAT00000014644	ENSBTAG00000011023	899	919	-22.04	aGTCACGTAAT-TGTCGAGAcc	x|||||||x||x|x|x||:|xx	tCAGTGCACTACAGAACTTTgt	TMEM52B
bta-miR-148a	ENSBTAT00000014663	ENSBTAG00000011042	1022	1043	-14.35	aGTCACGTcggaaccacctcaa	x|||||||xxxxxxxxxxxxxx	tCAGTGCActacagaactttgt	TMEM129
bta-miR-148a	ENSBTAT00000014685	ENSBTAG00000011059	921	942	-18.73	cGTCACGTGAAATTATGAAttt	x|||||||||xx|:x||||xxx	tCAGTGCACTACAGAACTTtgt	CDKN2C
bta-miR-148a	ENSBTAT00000014699	ENSBTAG00000011070	452	473	-15.96	aGTCACGTCCTGTTccgccata	x|||||||xx|||:xxxxxxxx	tCAGTGCACTACAGaactttgt	RTCB
bta-miR-148a	ENSBTAT00000014744	ENSBTAG00000011104	361	382	-17.5	tGTCACGTGTTtgacacttttc	x||||||||x|xxxxxxxxxxx	tCAGTGCACTAcagaactttgt	RTN4
bta-miR-148a	ENSBTAT00000014749	ENSBTAG00000011105	1240	1261	-14.45	cGTCACGTGCACTCAAAAAAat	x||||||||xxx||xxx|||xx	tCAGTGCACTACAGAACTTTgt	SLC38A2
bta-miR-148a	ENSBTAT00000014839	ENSBTAG00000011173	355	376	-16.8	aGTCACGTCTTCTCTTagcact	x|||||||xx|x||||xxxxxx	tCAGTGCACTACAGAActttgt	FAM189A2
bta-miR-148a	ENSBTAT00000015000	ENSBTAG00000011291	1896	1917	-20.82	gGTCACGTGACGggtccctttc	x|||||||||x|xxxxxxxxxx	tCAGTGCACTACagaactttgt	DLG3
bta-miR-148a	ENSBTAT00000015200	ENSBTAG00000011437	151	172	-13.56	aGTCACGTTCCTTTTTttttta	x|||||||xxxx|:||xxxxxx	tCAGTGCACTACAGAActttgt	-
bta-miR-148a	ENSBTAT00000015295	ENSBTAG00000011509	202	223	-14.26	tGTCACGTCAGATCggagggaa	x|||||||x|xx||xxxxxxxx	tCAGTGCACTACAGaactttgt	SERAC1
bta-miR-148a	ENSBTAT00000015325	ENSBTAG00000011532	1416	1439	-26.01	gGTCACGTGGGTGTCTGTGtgcga	x||||||||:x|||||x||xxxxx	tCAGTGCACT-ACAGA-ACtttgt	MLLT6
bta-miR-148a	ENSBTAT00000015439	ENSBTAG00000011623	141	162	-13.56	aGTCACGTtctacacctaattt	x|||||||xxxxxxxxxxxxxx	tCAGTGCActacagaactttgt	VMP1
bta-miR-148a	ENSBTAT00000015510	ENSBTAG00000011682	953	974	-13.18	tGTCACGTAACCTCTTtgtccc	x|||||||x|xx||||xxxxxx	tCAGTGCACTACAGAActttgt	GLI2
bta-miR-148a	ENSBTAT00000015524	ENSBTAG00000011692	197	218	-15.94	aGTCACGTTTTGCTTTtccgcc	x|||||||xx||x:||xxxxxx	tCAGTGCACTACAGAActttgt	BMERB1
bta-miR-148a	ENSBTAT00000015638	ENSBTAG00000011779	1192	1213	-17.01	gGTCACGTTTTGTTGTatcctg	x|||||||xx|||:x|xxxxxx	tCAGTGCACTACAGAActttgt	MAL2
bta-miR-148a	ENSBTAT00000015642	ENSBTAG00000011783	22	40	-17.47	aGTCACGT-AC--CTTGGAcgt	x|||||||x|xxx||||:|xxx	tCAGTGCACTACAGAACTTtgt	MPC1L
bta-miR-148a	ENSBTAT00000015643	ENSBTAG00000011786	173	190	-17.15	gGTCACGT----TCTTGTAGag	x|||||||xxxx|||||x|:xx	tCAGTGCACTACAGAACTTTgt	CLUH
bta-miR-148a	ENSBTAT00000015737	ENSBTAG00000011859	2070	2091	-17.45	gGTCACGTCGGAGTAA-GAAAat	x|||||||x|:x||xxx||||xx	tCAGTGCA-CTACAGAACTTTgt	IPPK
bta-miR-148a	ENSBTAT00000015761	ENSBTAG00000011879	273	299	-20.36	cGTCACGTCCCCGACTGGGTTGGGAct	x|||||||xxxx||x||xx|||::|xx	tCAGTGCA----CT-ACAGAACTTTgt	B4GALT2
bta-miR-148a	ENSBTAT00000015787	ENSBTAG00000011899	425	446	-18.55	aGTCACGTGTCGTTcccttttc	x||||||||xx||:xxxxxxxx	tCAGTGCACTACAGaactttgt	USP4
bta-miR-148a	ENSBTAT00000015797	ENSBTAG00000011909	436	458	-12.05	tGTCACGTTCATTCCTTacgttt	x|||||||xx||xx|||xxxxxx	tCAGTGCAC-TACAGAActttgt	ACVR1
bta-miR-148a	ENSBTAT00000015876	ENSBTAG00000011962	870	891	-13.53	aGTCACGTCAAGAATCGGGGta	x|||||||x|x|xx|x|:::xx	tCAGTGCACTACAGAACTTTgt	PLA2G3
bta-miR-148a	ENSBTAT00000015889	ENSBTAG00000011975	198	221	-14.23	aGTCACGTAAGTTCTCTTTAGtgc	x|||||||x|xx|x||||x|:xxx	tCAGTGCACT--ACAGAACTTtgt	SERPINB1
bta-miR-148a	ENSBTAT00000015917	ENSBTAG00000011997	143	164	-15.41	gGTCACGTCACGCCggaggtcg	x|||||||x|x|x|xxxxxxxx	tCAGTGCACTACAGaactttgt	ZMIZ2
bta-miR-148a	ENSBTAT00000016102	ENSBTAG00000012135	765	786	-12.05	tGTCACGTTCTAAATTAAttga	x|||||||xx|xxx||x|xxxx	tCAGTGCACTACAGAACTttgt	LARP1B
bta-miR-148a	ENSBTAT00000016109	ENSBTAG00000012144	67	87	-18.09	gGTCACGTCCCA-CTTGGGGtg	x|||||||xxxxx||||:::xx	tCAGTGCACTACAGAACTTTgt	ZMYND19
bta-miR-148a	ENSBTAT00000016117	ENSBTAG00000012149	793	814	-18.66	gGTCACGTCGAGTCTccttcga	x|||||||x:x||||xxxxxxx	tCAGTGCACTACAGAactttgt	HOXC8
bta-miR-148a	ENSBTAT00000016122	ENSBTAG00000012152	547	567	-18.78	tGTCACGTGAT-TCagcacaga	x||||||||||x||xxxxxxxx	tCAGTGCACTACAGaactttgt	NONO
bta-miR-148a	ENSBTAT00000016142	ENSBTAG00000012172	248	269	-13.53	aGTCACGTccagccctcttcct	x|||||||xxxxxxxxxxxxxx	tCAGTGCActacagaactttgt	MIDN
bta-miR-148a	ENSBTAT00000016206	ENSBTAG00000012219	922	944	-17.01	gGTCACGTACCAGTCTTtttgtt	x|||||||xxxx|||||xxxxxx	tCAGTGCACTA-CAGAActttgt	CSPG4
bta-miR-148a	ENSBTAT00000016239	ENSBTAG00000012242	389	410	-18.15	aGTCACGTGcgacgggttaccc	x||||||||xxxxxxxxxxxxx	tCAGTGCACtacagaactttgt	MAF1
bta-miR-148a	ENSBTAT00000016252	ENSBTAG00000012247	529	550	-12.36	cGTCACGTC-TCTTTGTGAtcgg	x|||||||xx|x|:|x|||xxxx	tCAGTGCACTACAGA-ACTttgt	MXRA8
bta-miR-148a	ENSBTAT00000016376	ENSBTAG00000012342	353	374	-20.81	tGTCACGTGATGATTAGTAGag	x|||||||||||x:|x|x|:xx	tCAGTGCACTACAGAACTTTgt	LIMA1
bta-miR-148a	ENSBTAT00000016449	ENSBTAG00000012397	1708	1730	-16.69	aGTCACGTAGATTTGATAAAtta	x|||||||x|||x|xx|x||xxx	tCAGTGCA-CTACAGAACTTtgt	DCK
bta-miR-148a	ENSBTAT00000016514	ENSBTAG00000012447	50	74	-15.6	tGTCACGTGTGAATTTCTaatactt	x||||||||xxx||x|||xxxxxxx	tCAGTGCAC---TACAGAactttgt	PPP1CB
bta-miR-148a	ENSBTAT00000016519	ENSBTAG00000012454	18	39	-21.29	gGTCACGTGGTGACactttttg	x||||||||:||x|xxxxxxxx	tCAGTGCACTACAGaactttgt	SLC35A3
bta-miR-148a	ENSBTAT00000016529	ENSBTAG00000012456	151	172	-13.11	tGTCACGTAAcacccatacggc	x|||||||x|xxxxxxxxxxxx	tCAGTGCACTacagaactttgt	HEPACAM2
bta-miR-148a	ENSBTAT00000016548	ENSBTAG00000012470	435	458	-16.1	gGTCACGTCAGTTGTTTTccccca	x|||||||x|xx|||:||xxxxxx	tCAGTGCACT--ACAGAActttgt	SNAPIN
bta-miR-148a	ENSBTAT00000016569	ENSBTAG00000012489	625	645	-10.77	#NAME?	x|||||||xxxxxxxxxxxxxx	tCAGTGCActacagaactttgt	TMEM266
bta-miR-148a	ENSBTAT00000016665	ENSBTAG00000012552	764	783	-22.02	aGTCACGT--TGTCTTGttttt	x|||||||xx|||||||xxxxx	tCAGTGCACTACAGAACtttgt	FMR1
bta-miR-148a	ENSBTAT00000016676	ENSBTAG00000012559	231	252	-19.53	aGTCACGTGccggaggggctcc	x||||||||xxxxxxxxxxxxx	tCAGTGCACtacagaactttgt	SLC6A18
bta-miR-148a	ENSBTAT00000016715	ENSBTAG00000012592	1567	1588	-16.76	gGTCACGTTCC-TCGTTGAAccg	x|||||||xxxx||x|||||xxx	tCAGTGCACTACAG-AACTTtgt	ANKLE1
bta-miR-148a	ENSBTAT00000016736	ENSBTAG00000012605	179	200	-14.1	gGTCACGTCTTCCTGTGccgca	x|||||||xx|xx:x||xxxxx	tCAGTGCACTACAGAACtttgt	GPR157
bta-miR-148a	ENSBTAT00000016757	ENSBTAG00000012623	774	795	-15.38	aGTCACGTCCTAGGTATAAAca	x|||||||xx|xxx|xx|||xx	tCAGTGCACTACAGAACTTTgt	NDP
bta-miR-148a	ENSBTAT00000016785	ENSBTAG00000012654	62	80	-11.59	cGTCACGT--T-TATAGAGAtt	x|||||||xx|x|x|x||:|xx	tCAGTGCACTACAGAACTTTgt	CHCHD1
bta-miR-148a	ENSBTAT00000016791	ENSBTAG00000012656	137	159	-16.92	gGTCACGTTTATGTTTgtctcca	x|||||||xx||||:|xxxxxxx	tCAGTGCAC-TACAGAactttgt	OVOL1
bta-miR-148a	ENSBTAT00000016824	ENSBTAG00000001692	1027	1049	-19.09	tGTCACGTTGGGGTCGTGGGtcc	x|||||||x|:x|||x||::xxx	tCAGTGCA-CTACAGAACTTtgt	NDST1
bta-miR-148a	ENSBTAT00000016841	ENSBTAG00000012678	1100	1119	-20.08	gGTCACGTC--GTCTCGGAcag	x|||||||xxx||||x|:|xxx	tCAGTGCACTACAGAACTTtgt	COLGALT1
bta-miR-148a	ENSBTAT00000016929	ENSBTAG00000012735	321	342	-12.56	cGTCACGTccggatacacgacc	x|||||||xxxxxxxxxxxxxx	tCAGTGCActacagaactttgt	CFAP157
bta-miR-148a	ENSBTAT00000017009	ENSBTAG00000012804	1239	1263	-15.83	aGTCACGTTTCGAATCTAAGAAAtc	x|||||||xxx|xx|||xx||||xx	tCAGTGCACTAC--AGAA-CTTTgt	REEP5
bta-miR-148a	ENSBTAT00000017076	ENSBTAG00000012848	400	421	-17.18	gGTCACGTGcgagaggggtgca	x||||||||xxxxxxxxxxxxx	tCAGTGCACtacagaactttgt	PTPRU
bta-miR-148a	ENSBTAT00000017091	ENSBTAG00000012860	126	147	-13.56	aGTCACGTcccagaacgacaga	x|||||||xxxxxxxxxxxxxx	tCAGTGCActacagaactttgt	PDZD11
bta-miR-148a	ENSBTAT00000017150	ENSBTAG00000012902	122	143	-16.28	cGTCACGTGTACTCTTTAtttg	x||||||||xxx||||x|xxxx	tCAGTGCACTACAGAACTttgt	ARL8B
bta-miR-148a	ENSBTAT00000017168	ENSBTAG00000012919	1460	1488	-20.29	aGTCACGTCTAATAAATGTCTGTGActag	x|||||||xxxxxxx||||||x|||xxxx	tCAGTGCAC------TACAGA-ACTttgt	MMP15
bta-miR-148a	ENSBTAT00000017182	ENSBTAG00000012931	320	342	-17.86	cGTCACGTCAAAGTTTTGAtttg	x|||||||x|xx||:||||xxxx	tCAGTGCACTA-CAGAACTttgt	PLN
bta-miR-148a	ENSBTAT00000017267	ENSBTAG00000012989	818	839	-12.78	cGTCACGTtccctgcggtcaag	x|||||||xxxxxxxxxxxxxx	tCAGTGCActacagaactttgt	UBE2L6
bta-miR-148a	ENSBTAT00000017282	ENSBTAG00000012998	1073	1093	-19.57	tGTCACGTGGAG-CTTTAAAta	x||||||||:x|x|||x|||xx	tCAGTGCACTACAGAACTTTgt	NAA30
bta-miR-148a	ENSBTAT00000017298	ENSBTAG00000013011	148	164	-10.8	#NAME?	x|||||||xxxx|:||x|||xx	tCAGTGCACTACAGAACTTTgt	PLAA
bta-miR-148a	ENSBTAT00000017362	ENSBTAG00000013063	1371	1392	-18.98	tGTCACGTGAAGTacacagata	x|||||||||x||xxxxxxxxx	tCAGTGCACTACAgaactttgt	ITGB1BP1
bta-miR-148a	ENSBTAT00000017371	ENSBTAG00000013065	576	601	-18.65	cGTCACGTGTCGGAAGTGTCGACAtg	x||||||||xxxx|x||x|x||x|xx	tCAGTGCAC----TACAGAACTTTgt	HFE
bta-miR-148a	ENSBTAT00000017381	ENSBTAG00000013071	354	375	-12.85	tGTCACGTctcacctttcggcc	x|||||||xxxxxxxxxxxxxx	tCAGTGCActacagaactttgt	GPR153
bta-miR-148a	ENSBTAT00000017447	ENSBTAG00000013116	357	378	-13.89	gGTCACGTacacgaacgataat	x|||||||xxxxxxxxxxxxxx	tCAGTGCActacagaactttgt	PLCB4
bta-miR-148a	ENSBTAT00000017505	ENSBTAG00000013155	71	92	-14.63	aGTCACGTctcaggatctcact	x|||||||xxxxxxxxxxxxxx	tCAGTGCActacagaactttgt	COL2A1
bta-miR-148a	ENSBTAT00000017582	ENSBTAG00000013211	572	598	-21.02	aGTCACGTGTGAAGATGTCTccatcat	x||||||||xxxxx||||||xxxxxxx	tCAGTGCAC-----TACAGAactttgt	CFAP97
bta-miR-148a	ENSBTAT00000017647	ENSBTAG00000025853	1404	1425	-16.12	aGTCACGTAAACATCTGAGGta	x|||||||x|xxx:x|||::xx	tCAGTGCACTACAGAACTTTgt	HOMER1
bta-miR-148a	ENSBTAT00000017667	ENSBTAG00000013284	926	947	-13.7	tGTCACGTTATcagaacaatga	x|||||||x||xxxxxxxxxxx	tCAGTGCACTAcagaactttgt	SGK3
bta-miR-148a	ENSBTAT00000017775	ENSBTAG00000013363	851	874	-13.23	cGTCACGTCTAAAGACCAGGAAac	x|||||||xxx|x|x|xx|:||xx	tCAGTGCAC--TACAGAACTTTgt	CAP1
bta-miR-148a	ENSBTAT00000017812	ENSBTAG00000013387	765	786	-12.35	tGTCACGTTTGGTATTAAAGta	x|||||||xxx||x||x||:xx	tCAGTGCACTACAGAACTTTgt	CHMP4B
bta-miR-148a	ENSBTAT00000017854	ENSBTAG00000013417	757	778	-16.6	tGTCACGTCGTagagggactct	x|||||||x:|xxxxxxxxxxx	tCAGTGCACTAcagaactttgt	GLYCAM1
bta-miR-148a	ENSBTAT00000017894	ENSBTAG00000013452	671	693	-16.57	tGTCACGTCACTGTCaaagtaaa	x|||||||x|x||||xxxxxxxx	tCAGTGCACT-ACAGaactttgt	AQP9
bta-miR-148a	ENSBTAT00000017923	ENSBTAG00000013478	1045	1071	-20.84	aGTCACGTCCTGAAGAGTCTCGGAAac	x|||||||xxx||x|xx|||x|:||xx	tCAGTGCA---CTAC--AGAACTTTgt	MARVELD1
bta-miR-148a	ENSBTAT00000017950	ENSBTAG00000013501	92	113	-13.89	gGTCACGTaccgggccgtgtgt	x|||||||xxxxxxxxxxxxxx	tCAGTGCActacagaactttgt	DHRS13
bta-miR-148a	ENSBTAT00000017953	ENSBTAG00000013502	73	94	-18.14	aGTCACGTGtcagtgagtccat	x||||||||xxxxxxxxxxxxx	tCAGTGCACtacagaactttgt	SLC1A6
bta-miR-148a	ENSBTAT00000017984	ENSBTAG00000013525	732	753	-13.62	tGTCACGTAAccgaaaacctgg	x|||||||x|xxxxxxxxxxxx	tCAGTGCACTacagaactttgt	MPIG6B
bta-miR-148a	ENSBTAT00000017987	ENSBTAG00000013528	619	639	-18.46	gGTCACGTCC-GTCCCGAGAag	x|||||||xxx|||xx||:|xx	tCAGTGCACTACAGAACTTTgt	CHMP7
bta-miR-148a	ENSBTAT00000018013	ENSBTAG00000013545	954	975	-15.04	cGTCACGT-ATGAATTTGGGtga	x|||||||x|||xx:|||::xxx	tCAGTGCACTACA-GAACTTtgt	MAVS
bta-miR-148a	ENSBTAT00000018100	ENSBTAG00000013615	1462	1479	-13.22	gGTCACGT----TTTTAAAGaa	x|||||||xxxx|:||x||:xx	tCAGTGCACTACAGAACTTTgt	CHORDC1
bta-miR-148a	ENSBTAT00000018110	ENSBTAG00000013624	1721	1742	-15	gGTCACGTCAaaggtgagcggg	x|||||||x|xxxxxxxxxxxx	tCAGTGCACTacagaactttgt	LMNB2
bta-miR-148a	ENSBTAT00000018116	ENSBTAG00000013629	202	223	-16.28	gGTCACGTGtacacactctgac	x||||||||xxxxxxxxxxxxx	tCAGTGCACtacagaactttgt	GET1
bta-miR-148a	ENSBTAT00000018145	ENSBTAG00000013652	1154	1177	-13.22	gGTCACGTTCTCTCCATTCATAca	x|||||||xx|x||xx||x|x|xx	tCAGTGCACTACAG--AACTTTgt	GTF2A1
bta-miR-148a	ENSBTAT00000018261	ENSBTAG00000013745	871	898	-21.66	aGTCACGTCGACCACCCGTCTTGGGttt	x|||||||x||xxxxxx||||||::xxx	tCAGTGCA-CTA-----CAGAACTTtgt	ITGA5
bta-miR-148a	ENSBTAT00000018327	ENSBTAG00000013782	49	70	-16.28	gGTCACGTGtcccaacccgcga	x||||||||xxxxxxxxxxxxx	tCAGTGCACtacagaactttgt	DNAJB2
bta-miR-148a	ENSBTAT00000018350	ENSBTAG00000013812	434	455	-17.79	gGTCACGTAAAGTCTCATAAac	x|||||||x|x||||xxx||xx	tCAGTGCACTACAGAACTTTgt	RO60
bta-miR-148a	ENSBTAT00000018351	ENSBTAG00000013813	537	560	-18.45	aGTCACGTCCTAGGTCTTTActgt	x|||||||xx|xx|||||x|xxxx	tCAGTGCACTA--CAGAACTttgt	KLHL17
bta-miR-148a	ENSBTAT00000018382	ENSBTAG00000013831	3238	3259	-13.56	aGTCACGTtcatagtaatatag	x|||||||xxxxxxxxxxxxxx	tCAGTGCActacagaactttgt	DSG1
bta-miR-148a	ENSBTAT00000018394	ENSBTAG00000013848	1164	1187	-13.66	tGTCACGTTGGAAAGCGTCAGAac	x|||||||xx||xxx|x|x|:|xx	tCAGTGCA--CTACAGAACTTTgt	ADGRD1
bta-miR-148a	ENSBTAT00000018469	ENSBTAG00000013907	1047	1067	-14.81	tGTCACGTCA-GTTCCGAGGtg	x|||||||x|x||:xx||::xx	tCAGTGCACTACAGAACTTTgt	CRP
bta-miR-148a	ENSBTAT00000018489	ENSBTAG00000013922	1133	1152	-12.11	cGTCACGT-AT-TTAAGTAAga	x|||||||x||x|:xx|x||xx	tCAGTGCACTACAGAACTTTgt	MOSPD1
bta-miR-148a	ENSBTAT00000018512	ENSBTAG00000013932	188	209	-16.62	tGTCACGTGACGcggtactctg	x|||||||||x|xxxxxxxxxx	tCAGTGCACTACagaactttgt	CCDC71
bta-miR-148a	ENSBTAT00000018572	ENSBTAG00000013971	157	178	-16.04	gGTCACGTCTTCTCGGGCAcgg	x|||||||xx|x||xx|x|xxx	tCAGTGCACTACAGAACTTtgt	PI4KA
bta-miR-148a	ENSBTAT00000018677	ENSBTAG00000014054	138	158	-12.72	tGTCACGT-ATATTTactctta	x|||||||x||x|:|xxxxxxx	tCAGTGCACTACAGAactttgt	CFAP206
bta-miR-148a	ENSBTAT00000018745	ENSBTAG00000014099	44	64	-16.65	aGTCACGTAA-GTCACCAAtat	x|||||||x|x|||xxx||xxx	tCAGTGCACTACAGAACTTtgt	YTHDC2
bta-miR-148a	ENSBTAT00000018760	ENSBTAG00000014106	587	607	-14.87	gGTCACGT-ATAACATGttggg	x|||||||x||xx|x||xxxxx	tCAGTGCACTACAGAACtttgt	IPO8
bta-miR-148a	ENSBTAT00000018774	ENSBTAG00000014127	1169	1192	-14.23	aGTCACGTACTAAATTTTTATAat	x|||||||xx|xxx|:||x|x|xx	tCAGTGCACTAC--AGAACTTTgt	PTGS2
bta-miR-148a	ENSBTAT00000018808	ENSBTAG00000014151	1137	1158	-20.86	gGTCACGTGAAGggtcctctat	x|||||||||x|xxxxxxxxxx	tCAGTGCACTACagaactttgt	RCSD1
bta-miR-148a	ENSBTAT00000018840	ENSBTAG00000014175	834	857	-14.97	aGTCACGTTCATTGACTTAAAGtt	x|||||||xx||x|x|||x||:xx	tCAGTGCAC-TA-CAGAACTTTgt	STRAP
bta-miR-148a	ENSBTAT00000018852	ENSBTAG00000014179	1496	1517	-13.27	cGTCACGTacaggggggaatca	x|||||||xxxxxxxxxxxxxx	tCAGTGCActacagaactttgt	SLC12A5
bta-miR-148a	ENSBTAT00000018899	ENSBTAG00000014217	116	136	-17.37	aGTCACGTGGC-TTATAAAAtc	x||||||||:xx|:x|x|||xx	tCAGTGCACTACAGAACTTTgt	HHEX
bta-miR-148a	ENSBTAT00000018902	ENSBTAG00000014220	126	147	-13.56	aGTCACGTTTTTTTTTtcactc	x|||||||xx|x|:||xxxxxx	tCAGTGCACTACAGAActttgt	-
bta-miR-148a	ENSBTAT00000018920	ENSBTAG00000014235	381	402	-20.05	tGTCACGTTTGGCCTTGAtccg	x|||||||xxx|x|||||xxxx	tCAGTGCACTACAGAACTttgt	SMIM12
bta-miR-148a	ENSBTAT00000018923	ENSBTAG00000014237	1895	1917	-14.16	aGTCACGTCATAGTAATGctcca	x|||||||x||x||xx||xxxxx	tCAGTGCACTA-CAGAACtttgt	CYTH4
bta-miR-148a	ENSBTAT00000018952	ENSBTAG00000014255	62	82	-14.49	cGTCACGTACT-TTTTGAccga	x|||||||xx|x|:||||xxxx	tCAGTGCACTACAGAACTttgt	VPS50
bta-miR-148a	ENSBTAT00000019047	ENSBTAG00000014325	2165	2186	-13.79	aGTCACGTctaccactgacgtc	x|||||||xxxxxxxxxxxxxx	tCAGTGCActacagaactttgt	C3H1orf109
bta-miR-148a	ENSBTAT00000019114	ENSBTAG00000014376	1301	1322	-14.74	aGTCACGTcggacacccttact	x|||||||xxxxxxxxxxxxxx	tCAGTGCActacagaactttgt	ANKRD13A
bta-miR-148a	ENSBTAT00000019123	ENSBTAG00000014384	1938	1963	-17.1	aGTCACGTACCCCTGTCGTTGcccta	x|||||||xxxxx||||x|||xxxxx	tCAGTGCACT---ACAG-AACtttgt	ZDHHC22
bta-miR-148a	ENSBTAT00000019173	ENSBTAG00000014415	182	204	-17.63	cGTCACGTTGGGATCcccggtcg	x|||||||x:x|x||xxxxxxxx	tCAGTGCACTAC-AGaactttgt	ZNF653
bta-miR-148a	ENSBTAT00000019202	ENSBTAG00000014438	419	441	-15.58	cGTCACGTCGGTCACTctctgtt	x|||||||x|:|xx||xxxxxxx	tCAGTGCA-CTACAGAactttgt	SS18L1
bta-miR-148a	ENSBTAT00000019232	ENSBTAG00000014465	1468	1488	-14.8	gGTCACGTAGT-TCTTttttct	x|||||||x:|x||||xxxxxx	tCAGTGCACTACAGAActttgt	SERPINE1
bta-miR-148a	ENSBTAT00000019264	ENSBTAG00000014486	1592	1614	-12.95	tGTCACGTAATAGTAGATAAAtg	x|||||||x||x||xxxx|||xx	tCAGTGCACTA-CAGAACTTTgt	ATP12A
bta-miR-148a	ENSBTAT00000019293	ENSBTAG00000014514	882	904	-15.93	gGTCACGTCGAcacaagtctcct	x|||||||x||xxxxxxxxxxxx	tCAGTGCA-CTacagaactttgt	SEC1
bta-miR-148a	ENSBTAT00000019457	ENSBTAG00000014611	1146	1164	-12.72	tGTCACGT-AT--CGTAAAAga	x|||||||x||xx|x|x|||xx	tCAGTGCACTACAGAACTTTgt	SORL1
bta-miR-148a	ENSBTAT00000019468	ENSBTAG00000014619	509	531	-19.06	tGTCACGTTCGA-GTCTgtcgact	x|||||||xx||x||||xxxxxxx	tCAGTGCA--CTACAGAactttgt	WASF3
bta-miR-148a	ENSBTAT00000019501	ENSBTAG00000014645	3099	3124	-20.86	cGTCACGTCCCCGGGGGCGTGActaa	x|||||||xxxx|:x|x|x|||xxxx	tCAGTGCA----CTACAGAACTttgt	CNTN2
bta-miR-148a	ENSBTAT00000019519	ENSBTAG00000014659	712	733	-13.36	gGTCACGTTATATTATttttgg	x|||||||x||x|:x|xxxxxx	tCAGTGCACTACAGAActttgt	NEMP1
bta-miR-148a	ENSBTAT00000019526	ENSBTAG00000014665	237	260	-17.93	gGTCACGTCCTGAATCTTGTAAgg	x|||||||xx||xx|||||x||xx	tCAGTGCACTAC--AGAACTTTgt	ADAMTS2
bta-miR-148a	ENSBTAT00000019553	ENSBTAG00000014691	585	605	-21.97	tGTCACGTCCT-TCTTGAGAta	x|||||||xx|x||||||:|xx	tCAGTGCACTACAGAACTTTgt	ARFGEF1
bta-miR-148a	ENSBTAT00000019564	ENSBTAG00000014699	957	978	-16.52	tGTCACGTGActacactatttt	x|||||||||xxxxxxxxxxxx	tCAGTGCACTacagaactttgt	FAM81A
bta-miR-148a	ENSBTAT00000019602	ENSBTAG00000014729	370	390	-13.19	gGTCACGTCTT-TCCAAAAAtt	x|||||||xx|x||xxx|||xx	tCAGTGCACTACAGAACTTTgt	MRPL51
bta-miR-148a	ENSBTAT00000019692	ENSBTAG00000014799	110	132	-13.68	tGTCACGTTTATGgacggtacgg	x|||||||xx|||xxxxxxxxxx	tCAGTGCAC-TACagaactttgt	ARMC7
bta-miR-148a	ENSBTAT00000019742	ENSBTAG00000014825	848	869	-13.19	gGTCACGTCCTTTTCAGAGtgt	x|||||||xx|x|:xx||:xxx	tCAGTGCACTACAGAACTTtgt	NLK
bta-miR-148a	ENSBTAT00000019800	ENSBTAG00000038128	13	32	-12.56	cGTCACGT-A-GACGAGAAGac	x|||||||x|x|x|xx|||:xx	tCAGTGCACTACAGAACTTTgt	BOLA-DQA5
bta-miR-148a	ENSBTAT00000019810	ENSBTAG00000014880	606	626	-19.06	cGTCACGTG-TGACCTGAGAgt	x||||||||x||x|x|||:|xx	tCAGTGCACTACAGAACTTTgt	-
bta-miR-148a	ENSBTAT00000019858	ENSBTAG00000014915	843	868	-17.72	tGTCACGTGTCAATGGTTTTCCAAac	x||||||||xxx|||x|:||xx||xx	tCAGTGCAC---TAC-AGAACTTTgt	ETV5
bta-miR-148a	ENSBTAT00000019878	ENSBTAG00000014933	41	62	-12.9	tGTCACGTttagaaaggaagta	x|||||||xxxxxxxxxxxxxx	tCAGTGCActacagaactttgt	TRAK2
bta-miR-148a	ENSBTAT00000019994	ENSBTAG00000015018	148	169	-16.07	cGTCACGTGtcctaggttcagt	x||||||||xxxxxxxxxxxxx	tCAGTGCACtacagaactttgt	FSD2
bta-miR-148a	ENSBTAT00000020115	ENSBTAG00000015118	935	955	-12.9	tGTCACGTCCCGACA-GAAGgt	x|||||||xxx|x|xx|||:xx	tCAGTGCACTACAGAACTTTgt	PNPLA1
bta-miR-148a	ENSBTAT00000020135	ENSBTAG00000015132	98	117	-16.06	gGTCACGTCA-GT-TCAAAAcg	x|||||||x|x||x|xx|||xx	tCAGTGCACTACAGAACTTTgt	RXFP2
bta-miR-148a	ENSBTAT00000020140	ENSBTAG00000015140	1203	1225	-15.48	tGTCACGTCTGTGTTTcacgtcg	x|||||||xx:|||:|xxxxxxx	tCAGTGCAC-TACAGAactttgt	RUNDC1
bta-miR-148a	ENSBTAT00000020200	ENSBTAG00000015181	1238	1261	-17.01	cGTCACGTGGACTAACTTGtgtcc	x||||||||:xx|xx||||xxxxx	tCAGTGCACTACA--GAACtttgt	EPM2A
bta-miR-148a	ENSBTAT00000020207	ENSBTAG00000015188	1180	1202	-17.25	tGTCACGTAATTGTCgatctttt	x|||||||x||x|||xxxxxxxx	tCAGTGCACTA-CAGaactttgt	KLF6
bta-miR-148a	ENSBTAT00000020239	ENSBTAG00000015212	165	186	-16.52	tGTCACGTGACTTATTatcgtc	x|||||||||xx|x||xxxxxx	tCAGTGCACTACAGAActttgt	IFNAR2
bta-miR-148a	ENSBTAT00000020285	ENSBTAG00000030335	1275	1300	-23.4	tGTCACGTCTTGATCGTCTTGGtcct	x|||||||xxx|||x||||||:xxxx	tCAGTGCA---CTA-CAGAACTttgt	ALDH4A1
bta-miR-148a	ENSBTAT00000020287	ENSBTAG00000015251	15	34	-12.57	cGTCACGTTAT--TATGAAGta	x|||||||x||xx:x||||:xx	tCAGTGCACTACAGAACTTTgt	-
bta-miR-148a	ENSBTAT00000020318	ENSBTAG00000015278	274	295	-25.19	cGTCACGTG-TGTCCATGGGGcc	x||||||||x||||xx||:::xx	tCAGTGCACTACAGA-ACTTTgt	ARPC5L
bta-miR-148a	ENSBTAT00000020387	ENSBTAG00000015335	27	49	-18.46	aGTCACGTTTATGTaaaacagag	x|||||||xx||||xxxxxxxxx	tCAGTGCAC-TACAgaactttgt	ADGRB3
bta-miR-148a	ENSBTAT00000020392	ENSBTAG00000015340	543	566	-27.06	gGTCACGTTCCGGGTCTTGGGAcc	x|||||||xxx:x||||||::|xx	tCAGTGCAC--TACAGAACTTTgt	ANGPTL7
bta-miR-148a	ENSBTAT00000020561	ENSBTAG00000015470	488	510	-19.2	aGTCACGTC-TGTACCCCGGAAct	x|||||||xx|||xx|xx|:||xx	tCAGTGCACTACA--GAACTTTgt	SYPL2
bta-miR-148a	ENSBTAT00000020635	ENSBTAG00000015529	74	95	-21.07	tGTCACGTGTCTTGTTGcctcc	x||||||||xxx|x|||xxxxx	tCAGTGCACTACAGAACtttgt	CHCHD4
bta-miR-148a	ENSBTAT00000020740	ENSBTAG00000015612	1257	1277	-15.91	cGTCACGTT-TGTAAAGAGAgg	x|||||||xx|||xxx||:|xx	tCAGTGCACTACAGAACTTTgt	UTP6
bta-miR-148a	ENSBTAT00000020757	ENSBTAG00000015630	715	736	-12.72	tGTCACGTAACCTTTTtcatga	x|||||||x|xx|:||xxxxxx	tCAGTGCACTACAGAActttgt	RLIM
bta-miR-148a	ENSBTAT00000020825	ENSBTAG00000015683	1027	1048	-16.21	gGTCACGTAGAATCAAAAAAca	x|||||||x:xx||xxx|||xx	tCAGTGCACTACAGAACTTTgt	HSPA4
bta-miR-148a	ENSBTAT00000020830	ENSBTAG00000015686	110	129	-19.85	tGTCACGT--TGTTTTGAccag	x|||||||xx|||:||||xxxx	tCAGTGCACTACAGAACTttgt	TERF2IP
bta-miR-148a	ENSBTAT00000020875	ENSBTAG00000015724	26	47	-13.48	tGTCACGTTCAGAAGTGAccct	x|||||||xxx|xxx|||xxxx	tCAGTGCACTACAGAACTttgt	BPIFB1
bta-miR-148a	ENSBTAT00000020921	ENSBTAG00000015757	964	985	-15.76	tGTCACGTCAccgccgcggggc	x|||||||x|xxxxxxxxxxxx	tCAGTGCACTacagaactttgt	PHYHIP
bta-miR-148a	ENSBTAT00000020933	ENSBTAG00000015764	271	292	-16.62	aGTCACGTGtacaaaaataaag	x||||||||xxxxxxxxxxxxx	tCAGTGCACtacagaactttgt	EML2
bta-miR-148a	ENSBTAT00000021260	ENSBTAG00000015980	214	235	-19.53	gGTCACGTCGTCTCGGGCAcgc	x|||||||x:|x||xx|x|xxx	tCAGTGCACTACAGAACTTtgt	FASN
bta-miR-148a	ENSBTAT00000021383	ENSBTAG00000016063	513	533	-12.02	tGTCACGTCTT-TATTCAAtga	x|||||||xx|x|x||x||xxx	tCAGTGCACTACAGAACTTtgt	DNER
bta-miR-148a	ENSBTAT00000021523	ENSBTAG00000016170	188	211	-17.4	gGTCACGTCCGAGGACgactccgg	x|||||||xx||x|x|xxxxxxxx	tCAGTGCA--CTACAGaactttgt	KCNJ11
bta-miR-148a	ENSBTAT00000021569	ENSBTAG00000016208	212	234	-21.4	tGTCACGTCCGTGTCTCGGAGgg	x|||||||xx:|||||x|:|:xx	tCAGTGCAC-TACAGAACTTTgt	TGM2
bta-miR-148a	ENSBTAT00000021588	ENSBTAG00000016223	602	621	-14.97	cGTCACGTG-TC-CAAGAAAgc	x||||||||x|xx|xx||||xx	tCAGTGCACTACAGAACTTTgt	SCRN1
bta-miR-148a	ENSBTAT00000021617	ENSBTAG00000016250	194	215	-20.72	cGTCACGTGTGGAATTGTGAca	x||||||||xx|xx|||x:|xx	tCAGTGCACTACAGAACTTTgt	AKTIP
bta-miR-148a	ENSBTAT00000021832	ENSBTAG00000016414	1	22	-15.86	gGTCACGTCCGGCGGTCTcagt---	x|||||||xxx|xx||||xxxxxxx	tCAGTGCA---CTACAGAactttgt	VDR
bta-miR-148a	ENSBTAT00000021892	ENSBTAG00000016465	418	440	-11.44	cGTCACGTCCACGTTTcctcttt	x|||||||xx|x||:|xxxxxxx	tCAGTGCAC-TACAGAactttgt	DHCR7
bta-miR-148a	ENSBTAT00000021955	ENSBTAG00000016514	1054	1075	-14.03	tGTCACGTCCTCTgggctcaag	x|||||||xx|x|xxxxxxxxx	tCAGTGCACTACAgaactttgt	CPE
bta-miR-148a	ENSBTAT00000021981	ENSBTAG00000016529	520	546	-16.65	cGTCACGTTACAAGGTCGCTAGAGAtt	x|||||||xxxxx|:|xx||x||:|xx	tCAGTGCA-----CTACAGAACTTTgt	SLC25A30
bta-miR-148a	ENSBTAT00000022045	ENSBTAG00000016571	279	300	-13.47	tGTCACGTCTCTTCTgctccga	x|||||||xxxx|||xxxxxxx	tCAGTGCACTACAGAactttgt	FAM234A
bta-miR-148a	ENSBTAT00000022108	ENSBTAG00000016618	1627	1647	-20	aGTCACGTCAA-TAGTGAAGcg	x|||||||x|xx|xx||||:xx	tCAGTGCACTACAGAACTTTgt	DSTYK
bta-miR-148a	ENSBTAT00000022160	ENSBTAG00000016663	602	623	-16.51	cGTCACGTGGGGCTTTTAttta	x||||||||:x|x:||x|xxxx	tCAGTGCACTACAGAACTttgt	PIGN
bta-miR-148a	ENSBTAT00000022175	ENSBTAG00000016677	883	903	-13.4	cGTCACGTT-TAATTTGGAtac	x|||||||xx|xx:|||:|xxx	tCAGTGCACTACAGAACTTtgt	C1QL3
bta-miR-148a	ENSBTAT00000022206	ENSBTAG00000019859	906	927	-12.11	cGTCACGTaggacaaacacgga	x|||||||xxxxxxxxxxxxxx	tCAGTGCActacagaactttgt	B3GALT2
bta-miR-148a	ENSBTAT00000022231	ENSBTAG00000016723	559	580	-12.72	tGTCACGTAAaaaacagtaaaa	x|||||||x|xxxxxxxxxxxx	tCAGTGCACTacagaactttgt	GFI1
bta-miR-148a	ENSBTAT00000022232	ENSBTAG00000016724	33	54	-13.56	aGTCACGTttcactccatttca	x|||||||xxxxxxxxxxxxxx	tCAGTGCActacagaactttgt	NPEPL1
bta-miR-148a	ENSBTAT00000022236	ENSBTAG00000016731	233	253	-12.17	tGTCACGTC-TGCCTacctccg	x|||||||xx||x||xxxxxxx	tCAGTGCACTACAGAactttgt	TMEM42
bta-miR-148a	ENSBTAT00000022252	ENSBTAG00000016737	10	31	-15.68	tGTCACGTacctgccacaggct	x|||||||xxxxxxxxxxxxxx	tCAGTGCActacagaactttgt	CDK8
bta-miR-148a	ENSBTAT00000022302	ENSBTAG00000016768	2304	2325	-14.8	cGTCACGTGtaaatagactcag	x||||||||xxxxxxxxxxxxx	tCAGTGCACtacagaactttgt	SCN3B
bta-miR-148a	ENSBTAT00000022377	ENSBTAG00000016821	91	112	-14.09	cGTCACGTCGACTCAAGActcg	x|||||||x:xx||xx||xxxx	tCAGTGCACTACAGAACTttgt	SNX22
bta-miR-148a	ENSBTAT00000022411	ENSBTAG00000016846	1498	1518	-14.23	aGTCACGTACT-TATAAAGAat	x|||||||xx|x|x|xx|:|xx	tCAGTGCACTACAGAACTTTgt	YWHAB
bta-miR-148a	ENSBTAT00000022420	ENSBTAG00000016857	2290	2317	-21.81	aGTCACGTGCACTGCCCGTCTAGGAAtg	x||||||||x|x||xxxx|||x|:||xx	tCAGTGCAC-T-AC----AGAACTTTgt	ADAMTS15
bta-miR-148a	ENSBTAT00000022463	ENSBTAG00000016887	47	65	-15.43	gGTCACGTC---TCTTAGAGta	x|||||||xxxx||||x:|:xx	tCAGTGCACTACAGAACTTTgt	TAF11
bta-miR-148a	ENSBTAT00000022546	ENSBTAG00000016950	274	294	-17.96	gGTCACGT-ACGGGTCGGGGtt	x|||||||x|x|xx|x|:::xx	tCAGTGCACTACAGAACTTTgt	B3GAT3
bta-miR-148a	ENSBTAT00000022652	ENSBTAG00000017037	181	203	-20.44	gGTCACGTAGAGGGGTAGTGAgg	x|||||||x||x|xx|x|x:|xx	tCAGTGCA-CTACAGAACTTTgt	PKN1
bta-miR-148a	ENSBTAT00000022677	ENSBTAG00000017053	22	49	-15.44	cGTCACGTCGAAACGAAATTTTGGAGag	x|||||||xxxxxx||xx|:|||:|:xx	tCAGTGCA------CTACAGAACTTTgt	ABCB10
bta-miR-148a	ENSBTAT00000022687	ENSBTAG00000017060	122	143	-12.11	cGTCACGTAAaaaccaattgcc	x|||||||x|xxxxxxxxxxxx	tCAGTGCACTacagaactttgt	ITGB2
bta-miR-148a	ENSBTAT00000022701	ENSBTAG00000017069	424	447	-16.89	cGTCACGTCTGTTAGCTCGGGAct	x|||||||xx|x|xx||x|::|xx	tCAGTGCA--CTACAGAACTTTgt	GASK1B
bta-miR-148a	ENSBTAT00000022752	ENSBTAG00000017115	1465	1483	-14.3	cGTCACGTC---TCTCGAAGgt	x|||||||xxxx|||x|||:xx	tCAGTGCACTACAGAACTTTgt	TMEM41A
bta-miR-148a	ENSBTAT00000022813	ENSBTAG00000017167	1016	1039	-13.95	tGTCACGTAATCATTCACGAAAtt	x|||||||x||xxx||xx||||xx	tCAGTGCACTAC--AGAACTTTgt	LRAT
bta-miR-148a	ENSBTAT00000022854	ENSBTAG00000017196	154	178	-16.53	tGTCACGTCGATTCTTTGTCAAAtc	x|||||||x|||xx:|||xx|||xx	tCAGTGCA-CTACAGAAC--TTTgt	PDIA3
bta-miR-148a	ENSBTAT00000022907	ENSBTAG00000017239	1164	1186	-12.05	tGTCACGTTTTTCCTGTGGTAga	x|||||||xx|xx||x||:x|xx	tCAGTGCACTACAGA-ACTTTgt	GABBR1
bta-miR-148a	ENSBTAT00000022929	ENSBTAG00000011022	175	196	-20.74	aGTCACGTGACAATTTGAttag	x|||||||||xxx:||||xxxx	tCAGTGCACTACAGAACTttgt	ARPP19
bta-miR-148a	ENSBTAT00000022939	ENSBTAG00000017258	1021	1047	-15.29	gGTCACGTTTGATAGGTTCTTttatta	x|||||||xx|||x|xx||||xxxxxx	tCAGTGCA--CTA-C--AGAActttgt	ACSL3
bta-miR-148a	ENSBTAT00000022976	ENSBTAG00000017287	413	436	-12.84	tGTCACGTAAGAGATTTTTAtttt	x|||||||xx||xx|:||x|xxxx	tCAGTGCA--CTACAGAACTttgt	DRAM1
bta-miR-148a	ENSBTAT00000023019	ENSBTAG00000017310	105	127	-15.6	cGTCACGTCAAAGTCGAGCAcca	x|||||||x|xx|||xx|x|xxx	tCAGTGCACTA-CAGAACTTtgt	EVA1C
bta-miR-148a	ENSBTAT00000023064	ENSBTAG00000017348	816	835	-23.91	aGTCACGTGAA--CTTGGAGat	x|||||||||xxx||||:|:xx	tCAGTGCACTACAGAACTTTgt	FGF5
bta-miR-148a	ENSBTAT00000023088	ENSBTAG00000017362	612	633	-13.96	tGTCACGTTTAGTagtcgtctc	x|||||||xxx||xxxxxxxxx	tCAGTGCACTACAgaactttgt	CNOT6
bta-miR-148a	ENSBTAT00000023181	ENSBTAG00000017437	873	894	-16.97	gGTCACGTCCTGGGTGGActtc	x|||||||xx||xx|x||xxxx	tCAGTGCACTACAGAACTttgt	TMEM237
bta-miR-148a	ENSBTAT00000023198	ENSBTAG00000017451	15	36	-15.46	tGTCACGTCAccggacgctcgg	x|||||||x|xxxxxxxxxxxx	tCAGTGCACTacagaactttgt	TSPAN17
bta-miR-148a	ENSBTAT00000023218	ENSBTAG00000017465	1899	1921	-14.77	aGTCACGTAAAATACCAGACAat	x|||||||x|xx|x|xx||x|xx	tCAGTGCACTACA-GAACTTTgt	GNS
bta-miR-148a	ENSBTAT00000023305	ENSBTAG00000017528	361	387	-20.16	gGTCACGTCTGCTGAGTCTGTGCGAcg	x|||||||xx|x||xx|||x||x:|xx	tCAGTGCA--CTAC--AGA-ACTTTgt	SNAI3
bta-miR-148a	ENSBTAT00000023383	ENSBTAG00000017584	1356	1376	-16.93	tGTCACGTG-TCTATTCAAGca	x||||||||x|x|x||x||:xx	tCAGTGCACTACAGAACTTTgt	PLCG1
bta-miR-148a	ENSBTAT00000023448	ENSBTAG00000017627	760	780	-20.9	aGTCACGTGA-GTTATGttgta	x|||||||||x||:x||xxxxx	tCAGTGCACTACAGAACtttgt	STMN4
bta-miR-148a	ENSBTAT00000023514	ENSBTAG00000017681	832	854	-16.15	aGTCACGTCTTCTCTGTCAAAgg	x|||||||xx|x|||x|x|||xx	tCAGTGCACTACAGA-ACTTTgt	RIN1
bta-miR-148a	ENSBTAT00000023566	ENSBTAG00000017719	182	204	-21.76	gGTCACGTGTAGGTCTAGtgttc	x||||||||x|x||||x|xxxxx	tCAGTGCAC-TACAGAACtttgt	AKAP6
bta-miR-148a	ENSBTAT00000023588	ENSBTAG00000017740	601	622	-17.42	aGTCACGTTGGGTGTGGTAGgg	x|||||||x:x||x|x|x|:xx	tCAGTGCACTACAGAACTTTgt	TUBAL3
bta-miR-148a	ENSBTAT00000023595	ENSBTAG00000017745	227	247	-16.65	aGTCACGTT-TGTaggactttg	x|||||||xx|||xxxxxxxxx	tCAGTGCACTACAgaactttgt	IL6ST
bta-miR-148a	ENSBTAT00000023598	ENSBTAG00000017748	989	1010	-15.4	tGTCACGTACCGTCaatagtcg	x|||||||xxx|||xxxxxxxx	tCAGTGCACTACAGaactttgt	RNF44
bta-miR-148a	ENSBTAT00000023622	ENSBTAG00000017765	211	232	-15.04	aGTCACGTCCTCTCTattacac	x|||||||xx|x|||xxxxxxx	tCAGTGCACTACAGAactttgt	-
bta-miR-148a	ENSBTAT00000023668	ENSBTAG00000017801	329	350	-14.23	aGTCACGTAAaagggctgtatt	x|||||||x|xxxxxxxxxxxx	tCAGTGCACTacagaactttgt	ATP6AP2
bta-miR-148a	ENSBTAT00000023720	ENSBTAG00000017845	13	33	-19.23	aGTCACGTCGTGCCG-GAAGag	x|||||||x:||x|xx|||:xx	tCAGTGCACTACAGAACTTTgt	BAG1
bta-miR-148a	ENSBTAT00000023746	ENSBTAG00000017867	884	903	-17.4	gGTCACGT-ACC-CTTGAGctc	x|||||||x|xxx|||||:xxx	tCAGTGCACTACAGAACTTtgt	YPEL1
bta-miR-148a	ENSBTAT00000023908	ENSBTAG00000017967	698	718	-16.79	tGTCACGTTTATGTTT--AAAcc	x|||||||xx||||:|xx|||xx	tCAGTGCAC-TACAGAACTTTgt	PTGES3
bta-miR-148a	ENSBTAT00000023912	ENSBTAG00000017970	268	291	-16.01	cGTCACGTTCGTCGTCACGAGtcg	x|||||||xx|xx|||xx||:xxx	tCAGTGCA--CTACAGAACTTtgt	ZYX
bta-miR-148a	ENSBTAT00000023920	ENSBTAG00000017976	724	747	-18.97	cGTCACGTGCAGTGTCCTctcgtc	x||||||||xx:||||x|xxxxxx	tCAGTGCAC--TACAGAActttgt	ABL1
bta-miR-148a	ENSBTAT00000023950	ENSBTAG00000017999	369	392	-13.56	aGTCACGTTTCAATTTTCGAGtat	x|||||||xxx|xx|:|x||:xxx	tCAGTGCAC--TACAGAACTTtgt	TNRC6A
bta-miR-148a	ENSBTAT00000023990	ENSBTAG00000018020	237	257	-17.4	gGTCACGTCG-GTCCGGCActt	x|||||||x:x|||xx|x|xxx	tCAGTGCACTACAGAACTTtgt	GNAT1
bta-miR-148a	ENSBTAT00000024009	ENSBTAG00000018036	533	554	-12.72	tGTCACGTacacgatataaggt	x|||||||xxxxxxxxxxxxxx	tCAGTGCActacagaactttgt	CNOT7
bta-miR-148a	ENSBTAT00000024011	ENSBTAG00000018037	314	335	-16.06	cGTCACGTacggggaaaccaga	x|||||||xxxxxxxxxxxxxx	tCAGTGCActacagaactttgt	PSKH1
bta-miR-148a	ENSBTAT00000024034	ENSBTAG00000025848	69	91	-18.98	aGTCACGTCGAGGTTTTCAGAaa	x|||||||x||x||:||x|:|xx	tCAGTGCA-CTACAGAACTTTgt	RBM3
bta-miR-148a	ENSBTAT00000024049	ENSBTAG00000018063	1138	1159	-13.47	cGTCACGTtccaggtgagtcgt	x|||||||xxxxxxxxxxxxxx	tCAGTGCActacagaactttgt	SPATA2
bta-miR-148a	ENSBTAT00000024053	ENSBTAG00000018067	2204	2224	-20.03	aGTCACGTG-TCTCGGGAAtga	x||||||||x|x||xx|||xxx	tCAGTGCACTACAGAACTTtgt	S100PBP
bta-miR-148a	ENSBTAT00000024068	ENSBTAG00000018077	103	123	-16.12	gGTCACGTCGT-TTTCGAcccc	x|||||||x:|x|:|x||xxxx	tCAGTGCACTACAGAACTttgt	LYPD3
bta-miR-148a	ENSBTAT00000024228	ENSBTAG00000018202	320	341	-17.59	tGTCACGTAGTGTTACGAccgt	x|||||||x:|||:xx||xxxx	tCAGTGCACTACAGAACTttgt	CYB561A3
bta-miR-148a	ENSBTAT00000024233	ENSBTAG00000018207	227	245	-19.77	tGTCACGT--TGTCG-GAGAtg	x|||||||xx||||xx||:|xx	tCAGTGCACTACAGAACTTTgt	M6PR
bta-miR-148a	ENSBTAT00000024256	ENSBTAG00000018225	516	537	-17.03	gGTCACGTGGCTCCTacccctc	x||||||||:xxx||xxxxxxx	tCAGTGCACTACAGAactttgt	SIPA1L3
bta-miR-148a	ENSBTAT00000024299	ENSBTAG00000018258	536	556	-17.96	gGTCACGTTA-GTTATGGAcat	x|||||||x|x||:x||:|xxx	tCAGTGCACTACAGAACTTtgt	SRSF2
bta-miR-148a	ENSBTAT00000024333	ENSBTAG00000018285	164	185	-16.06	gGTCACGTCGTccaacgggagt	x|||||||x:|xxxxxxxxxxx	tCAGTGCACTAcagaactttgt	VAMP5
bta-miR-148a	ENSBTAT00000024342	ENSBTAG00000018289	404	425	-16.57	gGTCACGTCAAGTCacccgggt	x|||||||x|x|||xxxxxxxx	tCAGTGCACTACAGaactttgt	TMEM150A
bta-miR-148a	ENSBTAT00000024344	ENSBTAG00000018291	24	45	-21.66	gGTCACGTGTTTTGTCGtccct	x||||||||x|x|x|x|xxxxx	tCAGTGCACTACAGAACtttgt	C11H2orf68
bta-miR-148a	ENSBTAT00000024387	ENSBTAG00000038488	11	31	-13.64	tGTCACGT-ATGACcgccgcgt	x|||||||x|||x|xxxxxxxx	tCAGTGCACTACAGaactttgt	TMSB4X
bta-miR-148a	ENSBTAT00000024445	ENSBTAG00000031267	230	250	-12.44	tGTCACGTTG-GCCTTtctttg	x|||||||x:x|x|||xxxxxx	tCAGTGCACTACAGAActttgt	SERPINB9
bta-miR-148a	ENSBTAT00000024448	ENSBTAG00000018373	2026	2047	-12.34	cGTCACGTCCACTCTTttttta	x|||||||xxxx||||xxxxxx	tCAGTGCACTACAGAActttgt	DPYSL2
bta-miR-148a	ENSBTAT00000024587	ENSBTAG00000018474	676	697	-19.62	gGTCACGTGAgcgaagacctaa	x|||||||||xxxxxxxxxxxx	tCAGTGCACTacagaactttgt	IL6R
bta-miR-148a	ENSBTAT00000024676	ENSBTAG00000018540	1082	1103	-14.53	tGTCACGTTGTGATTATAAGaa	x|||||||x:||x:|xx||:xx	tCAGTGCACTACAGAACTTTgt	NOX4
bta-miR-148a	ENSBTAT00000024677	ENSBTAG00000018539	1255	1279	-14.3	aGTCACGTCCCGAGGACTAAGAGga	x|||||||xxx||x|x||xx:|:xx	tCAGTGCA---CTACAGAACTTTgt	KLK1
bta-miR-148a	ENSBTAT00000024720	ENSBTAG00000018576	2381	2403	-21.98	aGTCACGTTGGTCTCTGGGAAaa	x|||||||x|:|x|||x|:||xx	tCAGTGCA-CTACAGAACTTTgt	DPYSL5
bta-miR-148a	ENSBTAT00000024724	ENSBTAG00000018578	114	135	-17.27	cGTCACGTGTTGCCTgctcacg	x||||||||x||x||xxxxxxx	tCAGTGCACTACAGAactttgt	LOXL3
bta-miR-148a	ENSBTAT00000024758	ENSBTAG00000018603	351	372	-15.92	aGTCACGTAGCGTCcccaccct	x|||||||x:x|||xxxxxxxx	tCAGTGCACTACAGaactttgt	RGMA
bta-miR-148a	ENSBTAT00000024876	ENSBTAG00000018691	1477	1505	-18.21	gGTCACGTTCGGACTGTAGTGTTGAActa	x|||||||xxx||x|||xxxx|||||xxx	tCAGTGCA---CT-ACAG---AACTTtgt	RHOU
bta-miR-148a	ENSBTAT00000024993	ENSBTAG00000018770	1166	1190	-16.45	aGTCACGTTTGGGTATCTcaccacc	x|||||||xxx|:|x|||xxxxxxx	tCAGTGCA---CTACAGAactttgt	HSDL1
bta-miR-148a	ENSBTAT00000025007	ENSBTAG00000018784	203	225	-17.26	gGTCACGTCCGCGCCTCGGccgc	x|||||||xx:x|x||x|:xxxx	tCAGTGCAC-TACAGAACTttgt	CTSZ
bta-miR-148a	ENSBTAT00000025008	ENSBTAG00000018785	1280	1304	-14.87	cGTCACGTTATACAGTCTTTAtcca	x|||||||x||xxx|||||x|xxxx	tCAGTGCACTA---CAGAACTttgt	TUBB1
bta-miR-148a	ENSBTAT00000025040	ENSBTAG00000035286	1544	1565	-14.29	cGTCACGTGcccgaacgaatgg	x||||||||xxxxxxxxxxxxx	tCAGTGCACtacagaactttgt	CMC1
bta-miR-148a	ENSBTAT00000025061	ENSBTAG00000018829	17	39	-13.59	tGTCACGTCTTTATGTTCAAAgt	x|||||||xx|xx|x||x|||xx	tCAGTGCACTAC-AGAACTTTgt	SPRYD7
bta-miR-148a	ENSBTAT00000025207	ENSBTAG00000018941	112	131	-19.81	cGTCACGTG-TGTAT-GAGGgt	x||||||||x|||x|x||::xx	tCAGTGCACTACAGAACTTTgt	CPXM2
bta-miR-148a	ENSBTAT00000025307	ENSBTAG00000019013	30	52	-17.41	gGTCACGTCCACGTCAGGAcgtc	x|||||||xx|x|||xx||xxxx	tCAGTGCAC-TACAGAACTttgt	HECTD3
bta-miR-148a	ENSBTAT00000025468	ENSBTAG00000019132	313	334	-13.19	gGTCACGTCACGgaccatgtat	x|||||||x|x|xxxxxxxxxx	tCAGTGCACTACagaactttgt	DMP1
bta-miR-148a	ENSBTAT00000025476	ENSBTAG00000019139	398	419	-13.35	tGTCACGTTAAATTTTGtttga	x|||||||x|xx|:|||xxxxx	tCAGTGCACTACAGAACtttgt	PHF3
bta-miR-148a	ENSBTAT00000025510	ENSBTAG00000019167	586	607	-14.24	cGTCACGTccaccatatctggt	x|||||||xxxxxxxxxxxxxx	tCAGTGCActacagaactttgt	INPPL1
bta-miR-148a	ENSBTAT00000025564	ENSBTAG00000019204	1794	1816	-19.16	aGTCACGTGACTGaagaaccctc	x|||||||||x||xxxxxxxxxx	tCAGTGCACT-ACagaactttgt	RTN3
bta-miR-148a	ENSBTAT00000025586	ENSBTAG00000019216	27	48	-15.56	gGTCACGTCGGGACTCGtgttc	x|||||||x:x|x||x|xxxxx	tCAGTGCACTACAGAACtttgt	TUFM
bta-miR-148a	ENSBTAT00000025676	ENSBTAG00000019278	1136	1156	-15.53	cGTCACGTCGTG-CTCGcctcc	x|||||||x:||x||x|xxxxx	tCAGTGCACTACAGAACtttgt	KNTC1
bta-miR-148a	ENSBTAT00000025696	ENSBTAG00000019298	97	119	-19.04	gGTCACGTGGTTGACATAAAAgt	x||||||||:|x|x|x|x|||xx	tCAGTGCACTA-CAGAACTTTgt	STRADB
bta-miR-148a	ENSBTAT00000025752	ENSBTAG00000019334	669	688	-13.07	cGTCACGT-AT-TCTGGGccga	x|||||||x||x|||x|:xxxx	tCAGTGCACTACAGAACTttgt	KLC2
bta-miR-148a	ENSBTAT00000025832	ENSBTAG00000019386	213	232	-14.23	aGTCACGT-ATA-CTTcgtttc	x|||||||x||xx|||xxxxxx	tCAGTGCACTACAGAActttgt	BOLA-NC1
bta-miR-148a	ENSBTAT00000025843	ENSBTAG00000019394	1039	1061	-12.9	cGTCACGTAGTTATCTTtttcaa	x|||||||x|x|x||||xxxxxx	tCAGTGCA-CTACAGAActttgt	ANO5
bta-miR-148a	ENSBTAT00000025878	ENSBTAG00000019427	1731	1756	-13.53	aGTCACGTCTACGATTAGTTAAAAat	x|||||||xxxx|||xxx||x|||xx	tCAGTGCA----CTACAGAACTTTgt	KIAA0232
bta-miR-148a	ENSBTAT00000025935	ENSBTAG00000019470	754	775	-13.34	gGTCACGTttcgggcatataaa	x|||||||xxxxxxxxxxxxxx	tCAGTGCActacagaactttgt	NEK6
bta-miR-148a	ENSBTAT00000025950	ENSBTAG00000019486	2515	2539	-12.02	tGTCACGTCAAAATAGCTTCAAAat	x|||||||x|xxx|xx|||x|||xx	tCAGTGCACT---ACAGAACTTTgt	CLDN12
bta-miR-148a	ENSBTAT00000025965	ENSBTAG00000019495	632	653	-18.57	aGTCACGTctgagggagactgg	x|||||||xxxxxxxxxxxxxx	tCAGTGCActacagaactttgt	TEAD3
bta-miR-148a	ENSBTAT00000026008	ENSBTAG00000019524	378	399	-18.39	tGTCACGTGAatacgagtgtcc	x|||||||||xxxxxxxxxxxx	tCAGTGCACTacagaactttgt	ITGAD
bta-miR-148a	ENSBTAT00000026148	ENSBTAG00000019628	985	1005	-19.18	tGTCACGTGA-GTGTAGGTAcc	x|||||||||x||x|x|:x|xx	tCAGTGCACTACAGAACTTTgt	EDAR
bta-miR-148a	ENSBTAT00000026157	ENSBTAG00000019634	79	100	-15.54	gGTCACGTacacacaatgtgcc	x|||||||xxxxxxxxxxxxxx	tCAGTGCActacagaactttgt	PIDD1
bta-miR-148a	ENSBTAT00000026185	ENSBTAG00000019651	484	505	-20.35	aGTCACGTACTGTCTTttatga	x|||||||xx||||||xxxxxx	tCAGTGCACTACAGAActttgt	TRIM52
bta-miR-148a	ENSBTAT00000026248	ENSBTAG00000019692	978	999	-18.22	tGTCACGTCCTGGTCTGACAta	x|||||||xx||x:x|||x|xx	tCAGTGCACTACAGAACTTTgt	BCL2L2
bta-miR-148a	ENSBTAT00000026254	ENSBTAG00000019694	17	38	-15.24	tGTCACGTTCTGcgacaagtag	x|||||||xx||xxxxxxxxxx	tCAGTGCACTACagaactttgt	ADAM23
bta-miR-148a	ENSBTAT00000026283	ENSBTAG00000019721	589	610	-16.76	aGTCACGTcttccgacaaggac	x|||||||xxxxxxxxxxxxxx	tCAGTGCActacagaactttgt	REXO4
bta-miR-148a	ENSBTAT00000026327	ENSBTAG00000019757	284	305	-14.38	cGTCACGTGcaacagagagtac	x||||||||xxxxxxxxxxxxx	tCAGTGCACtacagaactttgt	SUDS3
bta-miR-148a	ENSBTAT00000026421	ENSBTAG00000019831	45	66	-14.46	tGTCACGTAAaaggtgctccgg	x|||||||x|xxxxxxxxxxxx	tCAGTGCACTacagaactttgt	MRPS11
bta-miR-148a	ENSBTAT00000026423	ENSBTAG00000019832	481	502	-15.63	gGTCACGTccctcaatgatgca	x|||||||xxxxxxxxxxxxxx	tCAGTGCActacagaactttgt	TGFBR2
bta-miR-148a	ENSBTAT00000026435	ENSBTAG00000019839	21	45	-16.15	tGTCACGTCTCATATGTCC-GAAtcc	x|||||||xxxxx|||||xx|||xxx	tCAGTGCAC----TACAGAACTTtgt	LTBP1
bta-miR-148a	ENSBTAT00000026452	ENSBTAG00000019857	875	896	-14.23	aGTCACGTAATcacaatttcac	x|||||||x||xxxxxxxxxxx	tCAGTGCACTAcagaactttgt	OTUD4
bta-miR-148a	ENSBTAT00000026471	ENSBTAG00000019866	2091	2109	-18.13	aGTCACGT----TCTATGAAAtt	x|||||||xxxx|||x|||||xx	tCAGTGCACTACAGA-ACTTTgt	NRP1
bta-miR-148a	ENSBTAT00000026474	ENSBTAG00000019869	244	267	-17.77	aGTCACGTGCAATGTATattttaa	x||||||||xx||||x|xxxxxxx	tCAGTGCAC--TACAGAactttgt	DGCR8
bta-miR-148a	ENSBTAT00000026621	ENSBTAG00000019986	177	198	-16.55	aGTCACGTCGGGGCcgctaccg	x|||||||x:x|x|xxxxxxxx	tCAGTGCACTACAGaactttgt	CSNK1D
bta-miR-148a	ENSBTAT00000026623	ENSBTAG00000047582	74	91	-19.67	cGTCACGT--TGTC--GAAGcg	x|||||||xx||||xx|||:xx	tCAGTGCACTACAGAACTTTgt	CSNK1E
bta-miR-148a	ENSBTAT00000026669	ENSBTAG00000020023	1125	1142	-21.46	gGTCACGTGG---CT-GAAAct	x||||||||:xxx||x||||xx	tCAGTGCACTACAGAACTTTgt	MTHFS
bta-miR-148a	ENSBTAT00000026679	ENSBTAG00000020030	983	1003	-13.56	aGTCACGTT-TATCCGTAAAac	x|||||||xx|x||xxx|||xx	tCAGTGCACTACAGAACTTTgt	FITM2
bta-miR-148a	ENSBTAT00000026682	ENSBTAG00000020031	1276	1297	-13.89	gGTCACGTAAgagagaacgaac	x|||||||x|xxxxxxxxxxxx	tCAGTGCACTacagaactttgt	PKD2
bta-miR-148a	ENSBTAT00000026724	ENSBTAG00000020060	703	721	-16.57	tGTCACGT--TGT-TCGAGAtt	x|||||||xx|||x|x||:|xx	tCAGTGCACTACAGAACTTTgt	TXNIP
bta-miR-148a	ENSBTAT00000026745	ENSBTAG00000020073	647	666	-14.64	gGTCACGT-ACGT-TGGAGtat	x|||||||x|x||x|x||:xxx	tCAGTGCACTACAGAACTTtgt	NCEH1
bta-miR-148a	ENSBTAT00000026753	ENSBTAG00000020079	383	406	-22.89	aGTCACGTGAGCCGTCTgtcctct	x|||||||||xxx||||xxxxxxx	tCAGTGCACTA--CAGAactttgt	MAP3K4
bta-miR-148a	ENSBTAT00000026762	ENSBTAG00000020087	1451	1471	-16.83	tGTCACGTC-TGTCATctaggt	x|||||||xx||||x|xxxxxx	tCAGTGCACTACAGAActttgt	CAMK2A
bta-miR-148a	ENSBTAT00000026881	ENSBTAG00000039696	765	786	-21.13	gGTCACGTGGTcggggttcgta	x||||||||:|xxxxxxxxxxx	tCAGTGCACTAcagaactttgt	SHD
bta-miR-148a	ENSBTAT00000027028	ENSBTAG00000020282	390	411	-13.53	aGTCACGTcccacagacgagta	x|||||||xxxxxxxxxxxxxx	tCAGTGCActacagaactttgt	DCTD
bta-miR-148a	ENSBTAT00000027125	ENSBTAG00000020355	654	674	-21.22	tGTCACGTATTGTCT-GACAga	x|||||||xx|||||x||x|xx	tCAGTGCACTACAGAACTTTgt	KLF4
bta-miR-148a	ENSBTAT00000027170	ENSBTAG00000020384	1095	1117	-20	tGTCACGTGTCTGTCaagttatt	x||||||||xx||||xxxxxxxx	tCAGTGCACT-ACAGaactttgt	WDR47
bta-miR-148a	ENSBTAT00000027175	ENSBTAG00000020387	2203	2224	-12.05	tGTCACGTtctaccctttcccc	x|||||||xxxxxxxxxxxxxx	tCAGTGCActacagaactttgt	MARF1
bta-miR-148a	ENSBTAT00000027230	ENSBTAG00000020432	64	85	-17.49	tGTCACGTGATcctaattctta	x||||||||||xxxxxxxxxxx	tCAGTGCACTAcagaactttgt	MIS12
bta-miR-148a	ENSBTAT00000027243	ENSBTAG00000020441	1673	1692	-16.63	tGTCACGTAAGGTC--GAAcct	x|||||||x|x|||xx|||xxx	tCAGTGCACTACAGAACTTtgt	HMG20A
bta-miR-148a	ENSBTAT00000027246	ENSBTAG00000020446	657	678	-20.12	cGTCACGTGAccggtcaccggt	x|||||||||xxxxxxxxxxxx	tCAGTGCACTacagaactttgt	THOP1
bta-miR-148a	ENSBTAT00000027256	ENSBTAG00000020454	1029	1050	-19.25	cGTCACGTGGTTTCTAGttcgt	x||||||||:|x|||x|xxxxx	tCAGTGCACTACAGAACtttgt	LZTS3
bta-miR-148a	ENSBTAT00000027352	ENSBTAG00000020530	22	44	-18.93	gGTCACGTCGAgagaggggacct	x|||||||x||xxxxxxxxxxxx	tCAGTGCA-CTacagaactttgt	MTIF3
bta-miR-148a	ENSBTAT00000027366	ENSBTAG00000020539	84	106	-19.64	aGTCACGTACAGGTCAAGACAcg	x|||||||xx|x|||xx||x|xx	tCAGTGCAC-TACAGAACTTTgt	CHPF
bta-miR-148a	ENSBTAT00000027498	ENSBTAG00000020634	1054	1075	-12.02	tGTCACGTCAccaccaagttct	x|||||||x|xxxxxxxxxxxx	tCAGTGCACTacagaactttgt	FBXO7
bta-miR-148a	ENSBTAT00000027527	ENSBTAG00000020657	138	160	-18.04	aGTCACGTCGGTacgggcccccg	x|||||||x|:|xxxxxxxxxxx	tCAGTGCA-CTAcagaactttgt	FAT1
bta-miR-148a	ENSBTAT00000027531	ENSBTAG00000020658	389	411	-19.02	cGTCACGTGAAAATATTAGGAca	x|||||||||xxx|x||x::|xx	tCAGTGCACTAC-AGAACTTTgt	LNX1
bta-miR-148a	ENSBTAT00000027587	ENSBTAG00000020700	2961	2981	-12.44	tGTCACGTT-TCTCTTcttcct	x|||||||xx|x||||xxxxxx	tCAGTGCACTACAGAActttgt	CLCN6
bta-miR-148a	ENSBTAT00000027625	ENSBTAG00000020731	355	375	-13.21	tGTCACGT-ATcccagtgtttc	x|||||||x||xxxxxxxxxxx	tCAGTGCACTAcagaactttgt	PRRG4
bta-miR-148a	ENSBTAT00000027644	ENSBTAG00000020745	347	368	-15.41	aGTCACGTAGGGGAAAGAAAgt	x|||||||x:x|xxxx||||xx	tCAGTGCACTACAGAACTTTgt	HIVEP3
bta-miR-148a	ENSBTAT00000027654	ENSBTAG00000020751	524	546	-19.87	gGTCACGTGGGTGgaccaggaga	x||||||||:x||xxxxxxxxxx	tCAGTGCACT-ACagaactttgt	HSF1
bta-miR-148a	ENSBTAT00000027667	ENSBTAG00000020761	509	528	-11.61	cGTCACGT--TTTCTTCActgt	x|||||||xx|x||||x|xxxx	tCAGTGCACTACAGAACTttgt	USP33
bta-miR-148a	ENSBTAT00000027690	ENSBTAG00000020781	49	68	-16.76	aGTCACGT-ATGA-TCGAAtcg	x|||||||x|||xx|x|||xxx	tCAGTGCACTACAGAACTTtgt	SETD6
bta-miR-148a	ENSBTAT00000027710	ENSBTAG00000020793	1139	1160	-20.63	aGTCACGT-ACGTAATTGAAAcc	x|||||||x|x||xx||||||xx	tCAGTGCACTACAG-AACTTTgt	KCNA4
bta-miR-148a	ENSBTAT00000027776	ENSBTAG00000020844	584	605	-28.4	aGTCACGTGATGTCTACACAcc	x||||||||||||||xx|x|xx	tCAGTGCACTACAGAACTTTgt	PGAP4
bta-miR-148a	ENSBTAT00000027783	ENSBTAG00000013848	1164	1187	-13.66	tGTCACGTTGGAAAGCGTCAGAac	x|||||||xx||xxx|x|x|:|xx	tCAGTGCA--CTACAGAACTTTgt	ADGRD1
bta-miR-148a	ENSBTAT00000027825	ENSBTAG00000020886	42	63	-11.41	cGTCACGTCTCGTagttcgtag	x|||||||xxx||xxxxxxxxx	tCAGTGCACTACAgaactttgt	UTP25
bta-miR-148a	ENSBTAT00000027870	ENSBTAG00000020921	309	329	-13.37	cGTCACGTCCT-TGTTccccct	x|||||||xx|x|x||xxxxxx	tCAGTGCACTACAGAActttgt	PRKCB
bta-miR-148a	ENSBTAT00000028031	ENSBTAG00000021046	857	877	-15.6	gGTCACGTCATA-CTTGcgctg	x|||||||x||xx||||xxxxx	tCAGTGCACTACAGAACtttgt	ELAVL4
bta-miR-148a	ENSBTAT00000028037	ENSBTAG00000021050	258	279	-12.05	tGTCACGTttgaccacctccga	x|||||||xxxxxxxxxxxxxx	tCAGTGCActacagaactttgt	ECEL1
bta-miR-148a	ENSBTAT00000028047	ENSBTAG00000021060	441	462	-16.68	tGTCACGTGtccccacgcttgt	x||||||||xxxxxxxxxxxxx	tCAGTGCACtacagaactttgt	FTSJ3
bta-miR-148a	ENSBTAT00000028054	ENSBTAG00000032680	561	582	-13.22	gGTCACGTTTTAGGGTAAAAgg	x|||||||xx|xxxx|x|||xx	tCAGTGCACTACAGAACTTTgt	TMEM63B
bta-miR-148a	ENSBTAT00000028072	ENSBTAG00000021076	409	428	-15.46	gGTCACGTT-TGT-TTCAAttt	x|||||||xx|||x||x||xxx	tCAGTGCACTACAGAACTTtgt	TNRC6B
bta-miR-148a	ENSBTAT00000028111	ENSBTAG00000021102	935	958	-14.31	gGTCACGTTAAACATCAAGAGAgt	x|||||||x|xxxx||xx||:|xx	tCAGTGCACTAC--AGAACTTTgt	GALM
bta-miR-148a	ENSBTAT00000028155	ENSBTAG00000021130	168	190	-20.23	aGTCACGTCGACCTTGTCGAcag	x|||||||x||xx|:x|x:|xxx	tCAGTGCA-CTACAGAACTTtgt	MFSD10
bta-miR-148a	ENSBTAT00000028174	ENSBTAG00000021140	129	151	-12.72	tGTCACGTAATTTACTTctatgg	x|||||||x||x|x|||xxxxxx	tCAGTGCACTACA-GAActttgt	RMND5A
bta-miR-148a	ENSBTAT00000028315	ENSBTAG00000021249	425	448	-16.6	aGTCACGTCAGTGAGTGTGCAtgg	x|||||||x|x||xx|x||x|xxx	tCAGTGCACT-ACAGA-ACTTtgt	LAT
bta-miR-148a	ENSBTAT00000028324	ENSBTAG00000021253	678	699	-14.86	tGTCACGTttgctgcagcgcac	x|||||||xxxxxxxxxxxxxx	tCAGTGCActacagaactttgt	PRDM15
bta-miR-148a	ENSBTAT00000028385	ENSBTAG00000021301	436	458	-16.62	aGTCACGTGTATagacacttata	x||||||||x||xxxxxxxxxxx	tCAGTGCAC-TAcagaactttgt	ACSF2
bta-miR-148a	ENSBTAT00000028427	ENSBTAG00000021323	52	73	-12.05	tGTCACGTtctccgcctctcta	x|||||||xxxxxxxxxxxxxx	tCAGTGCActacagaactttgt	AGFG1
bta-miR-148a	ENSBTAT00000028493	ENSBTAG00000021373	132	153	-22.2	cGTCACGTGG-GTCGACGAGAgg	x||||||||:x|||xxx||:|xx	tCAGTGCACTACAGAA-CTTTgt	GTF3C5
bta-miR-148a	ENSBTAT00000028645	ENSBTAG00000021491	369	390	-11.41	cGTCACGTCATcaatcaatgtt	x|||||||x||xxxxxxxxxxx	tCAGTGCACTAcagaactttgt	NDUFV3
bta-miR-148a	ENSBTAT00000028663	ENSBTAG00000021505	142	163	-14.9	tGTCACGTGcagcacaagtgga	x||||||||xxxxxxxxxxxxx	tCAGTGCACtacagaactttgt	USP36
bta-miR-148a	ENSBTAT00000028707	ENSBTAG00000021543	93	115	-14.77	tGTCACGTTCATGACccaacaaa	x|||||||xx|||x|xxxxxxxx	tCAGTGCAC-TACAGaactttgt	MDFIC
bta-miR-148a	ENSBTAT00000028744	ENSBTAG00000021573	1450	1472	-13.28	tGTCACGTCCTTATACTGAAGaa	x|||||||xx|xx|xx||||:xx	tCAGTGCACTAC-AGAACTTTgt	DCAF12
bta-miR-148a	ENSBTAT00000028789	ENSBTAG00000021604	338	358	-16.38	cGTCACGTT-TGTCTccgcccc	x|||||||xx|||||xxxxxxx	tCAGTGCACTACAGAactttgt	TMEM138
bta-miR-148a	ENSBTAT00000028815	ENSBTAG00000021626	297	317	-14.2	tGTCACGTCGC-TCGTGtggtc	x|||||||x:xx||x||xxxxx	tCAGTGCACTACAGAACtttgt	MLC1
bta-miR-148a	ENSBTAT00000028854	ENSBTAG00000021652	52	73	-14.5	cGTCACGTGTTTTTTTttaccc	x||||||||x|x|:||xxxxxx	tCAGTGCACTACAGAActttgt	PDZD9
bta-miR-148a	ENSBTAT00000028887	ENSBTAG00000021678	518	539	-17.56	aGTCACGTTGTGCAGTGTAGat	x|||||||x:||xxx||x|:xx	tCAGTGCACTACAGAACTTTgt	SLC31A1
bta-miR-148a	ENSBTAT00000028919	ENSBTAG00000021697	936	961	-18.76	cGTCACGTGTGGGACATGTTGGAAtg	x||||||||xx|xxxx|x|||:||xx	tCAGTGCACTAC----AGAACTTTgt	PDGFB
bta-miR-148a	ENSBTAT00000028921	ENSBTAG00000021699	515	536	-12.72	tGTCACGTacacacacatattc	x|||||||xxxxxxxxxxxxxx	tCAGTGCActacagaactttgt	RORB
bta-miR-148a	ENSBTAT00000028957	ENSBTAG00000021723	328	349	-19.25	gGTCACGTtcgggggacggtct	x|||||||xxxxxxxxxxxxxx	tCAGTGCActacagaactttgt	EME1
bta-miR-148a	ENSBTAT00000028963	ENSBTAG00000021727	2073	2093	-15.31	cGTCACGTG-TGGCaccccaaa	x||||||||x||x|xxxxxxxx	tCAGTGCACTACAGaactttgt	NTSR1
bta-miR-148a	ENSBTAT00000028966	ENSBTAG00000021730	662	683	-13.19	gGTCACGTCAaactcaatcttt	x|||||||x|xxxxxxxxxxxx	tCAGTGCACTacagaactttgt	GJD2
bta-miR-148a	ENSBTAT00000028967	ENSBTAG00000021731	895	915	-17.1	gGTCACGTCCTCT-TCGACAgt	x|||||||xx|x|x|x||x|xx	tCAGTGCACTACAGAACTTTgt	TGFBRAP1
bta-miR-148a	ENSBTAT00000029081	ENSBTAG00000021815	1002	1023	-14.36	aGTCACGTTCTGcaaccattct	x|||||||xx||xxxxxxxxxx	tCAGTGCACTACagaactttgt	STARD13
bta-miR-148a	ENSBTAT00000029082	ENSBTAG00000033702	760	781	-14.09	cGTCACGTaccggttgccgatg	x|||||||xxxxxxxxxxxxxx	tCAGTGCActacagaactttgt	STARD8
bta-miR-148a	ENSBTAT00000029107	ENSBTAG00000021836	903	924	-15.61	gGTCACGTccctggtccacgag	x|||||||xxxxxxxxxxxxxx	tCAGTGCActacagaactttgt	TCEA2
bta-miR-148a	ENSBTAT00000029121	ENSBTAG00000017395	599	620	-12.16	tGTCACGTctttgcacctcgat	x|||||||xxxxxxxxxxxxxx	tCAGTGCActacagaactttgt	CERS5
bta-miR-148a	ENSBTAT00000029190	ENSBTAG00000021896	280	305	-20.98	cGTCACGTCCGAGGAGTCTCGGGtct	x|||||||xxxx|:x||||x|::xxx	tCAGTGCA----CTACAGAACTTtgt	NUP214
bta-miR-148a	ENSBTAT00000029228	ENSBTAG00000021923	800	820	-12.72	tGTCACGT-ATACCAAGTGAca	x|||||||x||xx|xx|x:|xx	tCAGTGCACTACAGAACTTTgt	DSG2
bta-miR-148a	ENSBTAT00000029270	ENSBTAG00000000147	422	443	-12.05	tGTCACGTTATaaccccgagtc	x|||||||x||xxxxxxxxxxx	tCAGTGCACTAcagaactttgt	RIC8B
bta-miR-148a	ENSBTAT00000029308	ENSBTAG00000021980	149	170	-16.62	aGTCACGTGtcccataccgagg	x||||||||xxxxxxxxxxxxx	tCAGTGCACtacagaactttgt	RASSF8
bta-miR-148a	ENSBTAT00000029373	ENSBTAG00000002130	577	597	-18.84	gGTCACGTCGAC--CTTGCAAac	x|||||||x||xxx||||x||xx	tCAGTGCA-CTACAGAACTTTgt	SMPD4
bta-miR-148a	ENSBTAT00000029564	ENSBTAG00000019845	825	846	-12.16	cGTCACGTctccggcggtccaa	x|||||||xxxxxxxxxxxxxx	tCAGTGCActacagaactttgt	USP30
bta-miR-148a	ENSBTAT00000029565	ENSBTAG00000018833	4	25	-14.96	gGTCACGTCGGGGGTAGccagt	x|||||||x:x|xx|x|xxxxx	tCAGTGCACTACAGAACtttgt	SVOP
bta-miR-148a	ENSBTAT00000029796	ENSBTAG00000015611	209	230	-12.12	tGTCACGTCCCGTTcgttcccg	x|||||||xxx||:xxxxxxxx	tCAGTGCACTACAGaactttgt	TBC1D9B
bta-miR-148a	ENSBTAT00000029827	ENSBTAG00000008438	297	318	-13.56	aGTCACGTTTAGACATAAtcca	x|||||||xxx|x|x|x|xxxx	tCAGTGCACTACAGAACTttgt	ARFIP1
bta-miR-148a	ENSBTAT00000030639	ENSBTAG00000014474	624	643	-13.97	cGTCACGT--T-TCGTTGAAtga	x|||||||xx|x||x|||||xxx	tCAGTGCACTACAG-AACTTtgt	API5
bta-miR-148a	ENSBTAT00000030664	ENSBTAG00000022632	1062	1085	-19.88	gGTCACGTGTGAGGTTTctaccgg	x||||||||xx|x||:|xxxxxxx	tCAGTGCAC--TACAGAactttgt	TCTA
bta-miR-148a	ENSBTAT00000030754	ENSBTAG00000022681	220	241	-14.99	aGTCACGTTTTATCATAAAAct	x|||||||xx|x||x|x|||xx	tCAGTGCACTACAGAACTTTgt	EOGT
bta-miR-148a	ENSBTAT00000030863	ENSBTAG00000002795	611	632	-12.02	tGTCACGTctataaatatcaat	x|||||||xxxxxxxxxxxxxx	tCAGTGCActacagaactttgt	NKTR
bta-miR-148a	ENSBTAT00000031089	ENSBTAG00000014488	202	223	-16.59	aGTCACGTCAGGgaacctgttc	x|||||||x|x|xxxxxxxxxx	tCAGTGCACTACagaactttgt	CDH7
bta-miR-148a	ENSBTAT00000031106	ENSBTAG00000022887	1593	1614	-15.81	tGTCACGTTGTGcagtcagcat	x|||||||x:||xxxxxxxxxx	tCAGTGCACTACagaactttgt	-
bta-miR-148a	ENSBTAT00000031167	ENSBTAG00000002069	243	262	-14.23	aGTCACGT-ATA-CTTcgtttc	x|||||||x||xx|||xxxxxx	tCAGTGCACTACAGAActttgt	BOLA
bta-miR-148a	ENSBTAT00000031299	ENSBTAG00000005963	1598	1619	-15.24	aGTCACGTccgacagacgacgg	x|||||||xxxxxxxxxxxxxx	tCAGTGCActacagaactttgt	MAT1A
bta-miR-148a	ENSBTAT00000031330	ENSBTAG00000008827	227	251	-17.89	aGTCACGTACGGTGTGTGTGtgtgt	x|||||||xx|:|||x|x||xxxxx	tCAGTGCA--CTACAGA-ACtttgt	SPOCK2
bta-miR-148a	ENSBTAT00000031802	ENSBTAG00000037537	708	729	-14.9	tGTCACGTGcacacacacgcaa	x||||||||xxxxxxxxxxxxx	tCAGTGCACtacagaactttgt	-
bta-miR-148a	ENSBTAT00000031806	ENSBTAG00000000027	123	143	-16.62	aGTCACGTTG-GTCCTccagta	x|||||||x:x|||x|xxxxxx	tCAGTGCACTACAGAActttgt	IGFL1
bta-miR-148a	ENSBTAT00000032084	ENSBTAG00000018287	106	124	-15.74	aGTCACGTC---TCCGGAAAag	x|||||||xxxx||xx||||xx	tCAGTGCACTACAGAACTTTgt	SLC25A48
bta-miR-148a	ENSBTAT00000032345	ENSBTAG00000023635	446	466	-13.22	gGTCACGT--TTTCTATGcccaa	x|||||||xx|x|||x||xxxxx	tCAGTGCACTACAGA-ACtttgt	CLEC6A
bta-miR-148a	ENSBTAT00000032353	ENSBTAG00000020889	609	629	-14.52	aGTCACGT-ACCTCCCTAAcag	x|||||||x|xx||xxx||xxx	tCAGTGCACTACAGAACTTtgt	CA7
bta-miR-148a	ENSBTAT00000032645	ENSBTAG00000023795	185	208	-14.56	gGTCACGTCGACTGACgacccccg	x|||||||x||x||x|xxxxxxxx	tCAGTGCA-CT-ACAGaactttgt	VAC14
bta-miR-148a	ENSBTAT00000032941	ENSBTAG00000007888	1236	1257	-15.94	tGTCACGTGGacacgacccggt	x||||||||:xxxxxxxxxxxx	tCAGTGCACTacagaactttgt	EFR3B
bta-miR-148a	ENSBTAT00000033253	ENSBTAG00000002039	1319	1340	-14.32	tGTCACGTaccctcgtctattg	x|||||||xxxxxxxxxxxxxx	tCAGTGCActacagaactttgt	FRMD8
bta-miR-148a	ENSBTAT00000033324	ENSBTAG00000013961	572	593	-11.41	cGTCACGTCAATATTTCAtttt	x|||||||x|xxx:||x|xxxx	tCAGTGCACTACAGAACTttgt	MYSM1
bta-miR-148a	ENSBTAT00000033404	ENSBTAG00000024204	15	36	-15.97	cGTCACGTcggaaataattccg	x|||||||xxxxxxxxxxxxxx	tCAGTGCActacagaactttgt	H2BE1
bta-miR-148a	ENSBTAT00000033450	ENSBTAG00000013860	21	42	-13.83	aGTCACGTTAaaccaagtcaat	x|||||||x|xxxxxxxxxxxx	tCAGTGCACTacagaactttgt	GADD45A
bta-miR-148a	ENSBTAT00000033568	ENSBTAG00000001135	788	813	-15.62	tGTCACGTGTACGACAGGTTCAAAtc	x||||||||x|x|x|xxx||x|||xx	tCAGTGCAC-TACAG---AACTTTgt	C3H1orf194
bta-miR-148a	ENSBTAT00000033670	ENSBTAG00000010161	184	205	-13.27	cGTCACGTcggcacgtcccatc	x|||||||xxxxxxxxxxxxxx	tCAGTGCActacagaactttgt	CCL21
bta-miR-148a	ENSBTAT00000033703	ENSBTAG00000016707	40	61	-17.95	aGTCACGTGtaagacggtgttg	x||||||||xxxxxxxxxxxxx	tCAGTGCACtacagaactttgt	FKBP9
bta-miR-148a	ENSBTAT00000033964	ENSBTAG00000008003	545	566	-15.48	cGTCACGTGccccaaaaaggaa	x||||||||xxxxxxxxxxxxx	tCAGTGCACtacagaactttgt	SMG7
bta-miR-148a	ENSBTAT00000033991	ENSBTAG00000005161	602	623	-21.13	gGTCACGTGGcccacacggccg	x||||||||:xxxxxxxxxxxx	tCAGTGCACTacagaactttgt	ATP8B2
bta-miR-148a	ENSBTAT00000034535	ENSBTAG00000024803	1182	1199	-14.05	aGTCACGT----TCTTAAtttt	x|||||||xxxx||||x|xxxx	tCAGTGCACTACAGAACTttgt	ENDOD1
bta-miR-148a	ENSBTAT00000034713	ENSBTAG00000007121	195	219	-17.23	cGTCACGTCTGGTGGTCggcggagg	x|||||||xx|:||x||xxxxxxxx	tCAGTGCA--CTAC-AGaactttgt	TK1
bta-miR-148a	ENSBTAT00000034753	ENSBTAG00000012564	263	284	-12.38	tGTCACGTctcctccacggtcc	x|||||||xxxxxxxxxxxxxx	tCAGTGCActacagaactttgt	KANSL1
bta-miR-148a	ENSBTAT00000034967	ENSBTAG00000020860	179	200	-13.8	tGTCACGTCGTATTAGGAAttt	x|||||||x:|x|:xx|||xxx	tCAGTGCACTACAGAACTTtgt	CHD1
bta-miR-148a	ENSBTAT00000034970	ENSBTAG00000009772	3383	3404	-14.23	aGTCACGTAAAGACATAAAttc	x|||||||x|x|x|x|x||xxx	tCAGTGCACTACAGAACTTtgt	LIX1
bta-miR-148a	ENSBTAT00000034976	ENSBTAG00000025046	359	379	-13.97	gGTCACGTC-TGTATccaccct	x|||||||xx|||x|xxxxxxx	tCAGTGCACTACAGAactttgt	ALKBH5
bta-miR-148a	ENSBTAT00000035086	ENSBTAG00000000306	185	207	-15.5	gGTCACGTCACCGACTCGGAAga	x|||||||x|xx|x||x|:||xx	tCAGTGCACTA-CAGAACTTTgt	ITK
bta-miR-148a	ENSBTAT00000035103	ENSBTAG00000038268	216	237	-18.58	cGTCACGTCC-GTCTAAGAAAtg	x|||||||xxx||||xx||||xx	tCAGTGCACTACAGAA-CTTTgt	-
bta-miR-148a	ENSBTAT00000035265	ENSBTAG00000010073	1184	1206	-14.86	cGTCACGTCGTAGGTTCGGGGtc	x|||||||x:|x|x:|x|:::xx	tCAGTGCACTA-CAGAACTTTgt	FLOT2
bta-miR-148a	ENSBTAT00000035288	ENSBTAG00000025181	52	73	-20.92	tGTCACGTGGTGCCTctttcct	x||||||||:||x||xxxxxxx	tCAGTGCACTACAGAactttgt	CCDC85C
bta-miR-148a	ENSBTAT00000035338	ENSBTAG00000025212	489	510	-12.43	cGTCACGTTACGggaatcctat	x|||||||x|x|xxxxxxxxxx	tCAGTGCACTACagaactttgt	HARS2
bta-miR-148a	ENSBTAT00000035403	ENSBTAG00000025242	390	411	-14.73	gGTCACGTcctccagtcgactc	x|||||||xxxxxxxxxxxxxx	tCAGTGCActacagaactttgt	C19H17orf78
bta-miR-148a	ENSBTAT00000035430	ENSBTAG00000025250	277	296	-12.05	tGTCACGT--TCACTTccaccc	x|||||||xx|xx|||xxxxxx	tCAGTGCACTACAGAActttgt	CCL3
bta-miR-148a	ENSBTAT00000035486	ENSBTAG00000032603	43	60	-14.94	tGTCACGT----TTTTGATAac	x|||||||xxxx|:||||x|xx	tCAGTGCACTACAGAACTTTgt	-
bta-miR-148a	ENSBTAT00000035582	ENSBTAG00000025358	251	272	-16.3	cGTCACGTGAaaaatcacgttc	x|||||||||xxxxxxxxxxxx	tCAGTGCACTacagaactttgt	SNX2
bta-miR-148a	ENSBTAT00000035608	ENSBTAG00000009647	58	81	-13.56	aGTCACGTTTCATTTTATTAGAgt	x|||||||xxx||x|:x|x|:|xx	tCAGTGCAC--TACAGAACTTTgt	PHAX
bta-miR-148a	ENSBTAT00000035753	ENSBTAG00000012170	558	579	-19.68	gGTCACGTcggcggtgccgacg	x|||||||xxxxxxxxxxxxxx	tCAGTGCActacagaactttgt	UBL3
bta-miR-148a	ENSBTAT00000035844	ENSBTAG00000025494	733	757	-18.14	cGTCACGTGTCCCTATTTTGtcttc	x||||||||xxxx|x|:|||xxxxx	tCAGTGCACT---ACAGAACtttgt	PAQR8
bta-miR-148a	ENSBTAT00000035930	ENSBTAG00000004347	942	963	-15.54	aGTCACGTTATATAGTGTAAac	x|||||||x||x|xx||x||xx	tCAGTGCACTACAGAACTTTgt	ADGRF5
bta-miR-148a	ENSBTAT00000035977	ENSBTAG00000011189	15	36	-15.87	gGTCACGTCGTcgccgccttcc	x|||||||x:|xxxxxxxxxxx	tCAGTGCACTAcagaactttgt	TJAP1
bta-miR-148a	ENSBTAT00000036068	ENSBTAG00000025593	195	215	-17.75	gGTCACGTG-TGACccagtcag	x||||||||x||x|xxxxxxxx	tCAGTGCACTACAGaactttgt	CCDC32
bta-miR-148a	ENSBTAT00000036144	ENSBTAG00000011104	361	382	-17.5	tGTCACGTGTTtgacacttttc	x||||||||x|xxxxxxxxxxx	tCAGTGCACTAcagaactttgt	RTN4
bta-miR-148a	ENSBTAT00000036293	ENSBTAG00000003038	308	329	-14.21	tGTCACGTATTAAAATGAAAag	x|||||||xx|xxxx|||||xx	tCAGTGCACTACAGAACTTTgt	TAP2
bta-miR-148a	ENSBTAT00000036316	ENSBTAG00000020769	45	67	-12.52	cGTCACGTCCATTTCagacacta	x|||||||xx||x||xxxxxxxx	tCAGTGCAC-TACAGaactttgt	OPCML
bta-miR-148a	ENSBTAT00000036414	ENSBTAG00000009330	274	292	-18.67	gGTCACGTGA---CTAGGAGgg	x|||||||||xxx||x|:|:xx	tCAGTGCACTACAGAACTTTgt	SIN3B
bta-miR-148a	ENSBTAT00000036427	ENSBTAG00000000720	259	280	-18.12	tGTCACGTGGTCTCcagttctg	x||||||||:|x||xxxxxxxx	tCAGTGCACTACAGaactttgt	CTSL
bta-miR-148a	ENSBTAT00000036775	ENSBTAG00000000011	1769	1790	-19.98	aGTCACGTGATccccagtcccc	x||||||||||xxxxxxxxxxx	tCAGTGCACTAcagaactttgt	TDH
bta-miR-148a	ENSBTAT00000036876	ENSBTAG00000026003	1000	1021	-13.26	tGTCACGTCCTCTGTgttctct	x|||||||xx|x|x|xxxxxxx	tCAGTGCACTACAGAactttgt	GUCY2F
bta-miR-148a	ENSBTAT00000037216	ENSBTAG00000026242	163	184	-13.89	gGTCACGTAAatacactatatg	x|||||||x|xxxxxxxxxxxx	tCAGTGCACTacagaactttgt	BAALC
bta-miR-148a	ENSBTAT00000037267	ENSBTAG00000004720	133	155	-15.53	cGTCACGTTTATGagatagatgt	x|||||||xx|||xxxxxxxxxx	tCAGTGCAC-TACagaactttgt	SULF1
bta-miR-148a	ENSBTAT00000037320	ENSBTAG00000005893	512	537	-17.13	aGTCACGTTCTCTACGTCTTTGAtct	x|||||||xx|xxxx|||||x:|xxx	tCAGTGCACTA----CAGAACTTtgt	TMEM68
bta-miR-148a	ENSBTAT00000037345	ENSBTAG00000007736	291	312	-20.52	tGTCACGTGAGGTCCTtcgtag	x|||||||||x|||x|xxxxxx	tCAGTGCACTACAGAActttgt	-
bta-miR-148a	ENSBTAT00000037717	ENSBTAG00000026519	291	312	-19.28	aGTCACGTAAGGACCTGGtccg	x|||||||x|x|x|x||:xxxx	tCAGTGCACTACAGAACTttgt	ADAT2
bta-miR-148a	ENSBTAT00000037763	ENSBTAG00000009251	80	101	-15.78	tGTCACGTTCAGTCagccagcg	x|||||||xxx|||xxxxxxxx	tCAGTGCACTACAGaactttgt	SZRD1
bta-miR-148a	ENSBTAT00000037916	ENSBTAG00000026626	411	432	-20.92	gGTCACGTGcacggagacacgt	x||||||||xxxxxxxxxxxxx	tCAGTGCACtacagaactttgt	ANHX
bta-miR-148a	ENSBTAT00000038048	ENSBTAG00000008331	151	172	-13.53	aGTCACGTcgcccgacccaccg	x|||||||xxxxxxxxxxxxxx	tCAGTGCActacagaactttgt	TMEM54
bta-miR-148a	ENSBTAT00000038058	ENSBTAG00000026684	242	262	-19.83	aGTCACGTGAC-TCTAGtcatg	x|||||||||xx|||x|xxxxx	tCAGTGCACTACAGAACtttgt	SYNC
bta-miR-148a	ENSBTAT00000038115	ENSBTAG00000019418	26	47	-17.12	gGTCACGTGGgcacgactcctc	x||||||||:xxxxxxxxxxxx	tCAGTGCACTacagaactttgt	UBE3D
bta-miR-148a	ENSBTAT00000038215	ENSBTAG00000017840	1510	1533	-15.03	gGTCACGTTCATGGGCATTAGAga	x|||||||xx|||xx|x|x|:|xx	tCAGTGCAC-TACA-GAACTTTgt	BAZ2A
bta-miR-148a	ENSBTAT00000038451	ENSBTAG00000000619	126	147	-13.23	tGTCACGTacacccaccggcgt	x|||||||xxxxxxxxxxxxxx	tCAGTGCActacagaactttgt	KRT74
bta-miR-148a	ENSBTAT00000038541	ENSBTAG00000010924	73	93	-22.33	tGTCACGT-ACGTCTGGAGcga	x|||||||x|x||||x||:xxx	tCAGTGCACTACAGAACTTtgt	LETMD1
bta-miR-148a	ENSBTAT00000038591	ENSBTAG00000026963	2342	2366	-19.75	tGTCACGTGACCTAGTCTgtatgtt	x|||||||||xx|x||||xxxxxxx	tCAGTGCACT--A-CAGAactttgt	NCALD
bta-miR-148a	ENSBTAT00000038616	ENSBTAG00000001861	216	241	-19.74	aGTCACGTTACAAATGTCAAGGAAga	x|||||||x|xxxx||||xx|:||xx	tCAGTGCACT----ACAGAACTTTgt	SESTD1
bta-miR-148a	ENSBTAT00000038788	ENSBTAG00000027074	884	905	-12.17	tGTCACGTTAcactcaagtact	x|||||||x|xxxxxxxxxxxx	tCAGTGCACTacagaactttgt	SV2B
bta-miR-148a	ENSBTAT00000038879	ENSBTAG00000014069	689	710	-16.62	aGTCACGTGTAAAATTTAAGtt	x||||||||xxxxx||x||:xx	tCAGTGCACTACAGAACTTTgt	PDK4
bta-miR-148a	ENSBTAT00000038937	ENSBTAG00000027162	525	546	-12.05	tGTCACGTtccaccctaccatt	x|||||||xxxxxxxxxxxxxx	tCAGTGCActacagaactttgt	TMCO5A
bta-miR-148a	ENSBTAT00000039203	ENSBTAG00000027337	234	256	-13.56	aGTCACGTTACTCCCGTTAAGaa	x|||||||x|x|xx|x|x||:xx	tCAGTGCACT-ACAGAACTTTgt	CTSA
bta-miR-148a	ENSBTAT00000039850	ENSBTAG00000008310	644	665	-13.56	aGTCACGTttttaagtttatcc	x|||||||xxxxxxxxxxxxxx	tCAGTGCActacagaactttgt	TMEM9B
bta-miR-148a	ENSBTAT00000039968	ENSBTAG00000013033	53	74	-11.41	cGTCACGTcctactcctctcat	x|||||||xxxxxxxxxxxxxx	tCAGTGCActacagaactttgt	BTBD10
bta-miR-148a	ENSBTAT00000042613	ENSBTAG00000019105	1263	1284	-16.88	cGTCACGTCGAGTCTctatgtc	x|||||||x:x||||xxxxxxx	tCAGTGCACTACAGAactttgt	NPLOC4
bta-miR-148a	ENSBTAT00000042716	ENSBTAG00000002539	590	612	-15.67	gGTCACGTTGGTTTTTTtttttc	x|||||||x|:|x|:||xxxxxx	tCAGTGCA-CTACAGAActttgt	TRIOBP
bta-miR-148a	ENSBTAT00000042960	ENSBTAG00000009617	629	649	-14.98	aGTCACGTTTCCTCT-GAtcgt	x|||||||xxxx|||x||xxxx	tCAGTGCACTACAGAACTttgt	SLC2A1
bta-miR-148a	ENSBTAT00000042971	ENSBTAG00000030435	133	153	-17.1	tGTCACGTG-TATTTTGttaat	x||||||||x|x|:|||xxxxx	tCAGTGCACTACAGAACtttgt	PNRC2
bta-miR-148a	ENSBTAT00000043071	ENSBTAG00000011243	126	146	-20.83	cGTCACGT--TGTCATAGAGAcg	x|||||||xx||||x|x||:|xx	tCAGTGCACTACAGAA-CTTTgt	TOE1
bta-miR-148a	ENSBTAT00000043072	ENSBTAG00000008735	1782	1802	-15.91	aGTCACGT-AGGTagaggggtc	x|||||||x|x||xxxxxxxxx	tCAGTGCACTACAgaactttgt	VASH1
bta-miR-148a	ENSBTAT00000043111	ENSBTAG00000018322	1683	1705	-15.35	aGTCACGTATTATTACTGAGAgt	x|||||||xx|x|:xx|||:|xx	tCAGTGCACTACAGA-ACTTTgt	SEC24A
bta-miR-148a	ENSBTAT00000043199	ENSBTAG00000030584	670	691	-12.87	tGTCACGTttgccccgtcggac	x|||||||xxxxxxxxxxxxxx	tCAGTGCActacagaactttgt	SLC35A4
bta-miR-148a	ENSBTAT00000043260	ENSBTAG00000014334	1606	1627	-16.37	aGTCACGTttttcccgtctgag	x|||||||xxxxxxxxxxxxxx	tCAGTGCActacagaactttgt	ZFYVE26
bta-miR-148a	ENSBTAT00000043383	ENSBTAG00000030686	40	62	-16.69	aGTCACGTTGAAATGACGGAAta	x|||||||x||xx|xxx|:||xx	tCAGTGCA-CTACAGAACTTTgt	RAVER2
bta-miR-148a	ENSBTAT00000043458	ENSBTAG00000010338	938	959	-13.19	gGTCACGTcccctgtacccaag	x|||||||xxxxxxxxxxxxxx	tCAGTGCActacagaactttgt	FBXO36
bta-miR-148a	ENSBTAT00000043570	ENSBTAG00000030817	1164	1191	-17.28	tGTCACGTACACCCGTGTGCGTGAAAtc	x|||||||xxxxxx:|||x|x|||||xx	tCAGTGCAC-----TACA-GAACTTTgt	LMBR1
bta-miR-148a	ENSBTAT00000043695	ENSBTAG00000008313	350	370	-14.39	tGTCACGTCG-GACCTGAAGac	x|||||||x:x|x|x||||:xx	tCAGTGCACTACAGAACTTTgt	KLF15
bta-miR-148a	ENSBTAT00000043776	ENSBTAG00000015902	741	762	-15.64	tGTCACGTTCAGTGGAGAtgtg	x|||||||xxx||xxx||xxxx	tCAGTGCACTACAGAACTttgt	PTGFR
bta-miR-148a	ENSBTAT00000043918	ENSBTAG00000017419	141	162	-12.81	tGTCACGTCTCGACCTGAActg	x|||||||xxx|x|x||||xxx	tCAGTGCACTACAGAACTTtgt	ZZZ3
bta-miR-148a	ENSBTAT00000043975	ENSBTAG00000008542	9	30	-15.35	gGTCACGTccggagtagtccct	x|||||||xxxxxxxxxxxxxx	tCAGTGCActacagaactttgt	SSPO
bta-miR-148a	ENSBTAT00000044278	ENSBTAG00000012753	1101	1122	-16.19	cGTCACGTcccgggggacaggt	x|||||||xxxxxxxxxxxxxx	tCAGTGCActacagaactttgt	BRF1
bta-miR-148a	ENSBTAT00000044349	ENSBTAG00000018164	441	462	-12.96	cGTCACGTcgcagacggaggtc	x|||||||xxxxxxxxxxxxxx	tCAGTGCActacagaactttgt	FNDC4
bta-miR-148a	ENSBTAT00000044457	ENSBTAG00000003556	344	364	-12.17	cGTCACGTCCT-TCGTGtggtc	x|||||||xx|x||x||xxxxx	tCAGTGCACTACAGAACtttgt	ZFYVE21
bta-miR-148a	ENSBTAT00000044645	ENSBTAG00000020688	68	89	-17.41	gGTCACGT-ACCTACCCGAAAca	x|||||||x|xx|x|xx||||xx	tCAGTGCACTACA-GAACTTTgt	ARHGEF15
bta-miR-148a	ENSBTAT00000044684	ENSBTAG00000040169	598	619	-15.69	gGTCACGTTACGACaccgtacc	x|||||||x|x|x|xxxxxxxx	tCAGTGCACTACAGaactttgt	-
bta-miR-148a	ENSBTAT00000044723	ENSBTAG00000031548	3	23	-15.95	cGTCACGTCTTC-CTCGGAAga	x|||||||xx|xx||x|:||xx	tCAGTGCACTACAGAACTTTgt	-
bta-miR-148a	ENSBTAT00000044771	ENSBTAG00000031579	324	343	-13.56	aGTCACGT--TTTCATAAAtat	x|||||||xx|x||x|x||xxx	tCAGTGCACTACAGAACTTtgt	SGO2
bta-miR-148a	ENSBTAT00000044888	ENSBTAG00000013142	706	727	-18.81	aGTCACGTGATATAATTAtctc	x||||||||||x|xx|x|xxxx	tCAGTGCACTACAGAACTttgt	MYNN
bta-miR-148a	ENSBTAT00000045089	ENSBTAG00000010519	253	273	-14.23	aGTCACGT-ACCTCTCCCAAag	x|||||||x|xx|||xxx||xx	tCAGTGCACTACAGAACTTTgt	NEURL4
bta-miR-148a	ENSBTAT00000045129	ENSBTAG00000031829	173	194	-15.57	tGTCACGTctgcccgtgcggcc	x|||||||xxxxxxxxxxxxxx	tCAGTGCActacagaactttgt	FTSJ1
bta-miR-148a	ENSBTAT00000045191	ENSBTAG00000031871	2175	2196	-15.37	gGTCACGTaggagaaacctttc	x|||||||xxxxxxxxxxxxxx	tCAGTGCActacagaactttgt	NKAPL
bta-miR-148a	ENSBTAT00000045206	ENSBTAG00000012385	749	770	-15.35	aGTCACGTctctccggcgtcac	x|||||||xxxxxxxxxxxxxx	tCAGTGCActacagaactttgt	NFX1
bta-miR-148a	ENSBTAT00000045447	ENSBTAG00000000902	1241	1262	-13.75	cGTCACGTCAaacgatgatgac	x|||||||x|xxxxxxxxxxxx	tCAGTGCACTacagaactttgt	OGT
bta-miR-148a	ENSBTAT00000045464	ENSBTAG00000032047	869	896	-13.23	tGTCACGTTTACTTATCGTCGTAAAAgt	x|||||||xxxxxx||x|||x|x|||xx	tCAGTGCAC-----TA-CAGAACTTTgt	-
bta-miR-148a	ENSBTAT00000045559	ENSBTAG00000011910	89	111	-15.86	aGTCACGTCGATTTTCCGAtttt	x|||||||x|||x|:xx||xxxx	tCAGTGCA-CTACAGAACTttgt	STK33
bta-miR-148a	ENSBTAT00000045685	ENSBTAG00000012112	307	328	-16.58	gGTCACGTTGAGTggttcattc	x|||||||x:x||xxxxxxxxx	tCAGTGCACTACAgaactttgt	SLC7A6
bta-miR-148a	ENSBTAT00000045694	ENSBTAG00000038748	111	132	-13.22	gGTCACGTTACTTTTatttaca	x|||||||x|xx|:|xxxxxxx	tCAGTGCACTACAGAactttgt	HBG
bta-miR-148a	ENSBTAT00000045734	ENSBTAG00000032288	348	370	-12.65	cGTCACGTCTTTACGTTGtttta	x|||||||xx|xx|x|||xxxxx	tCAGTGCACTACAG-AACtttgt	GCK
bta-miR-148a	ENSBTAT00000045860	ENSBTAG00000021964	81	101	-13.89	gGTCACGT-ATacaacctactt	x|||||||x||xxxxxxxxxxx	tCAGTGCACTAcagaactttgt	CDH17
bta-miR-148a	ENSBTAT00000045907	ENSBTAG00000032360	19	40	-16.29	aGTCACGTccaataggagtccg	x|||||||xxxxxxxxxxxxxx	tCAGTGCActacagaactttgt	NAP1L1
bta-miR-148a	ENSBTAT00000046162	ENSBTAG00000003455	19	40	-20.93	cGTCACGTGGTccgaagggaca	x||||||||:|xxxxxxxxxxx	tCAGTGCACTAcagaactttgt	ANKRD6
bta-miR-148a	ENSBTAT00000046182	ENSBTAG00000015251	986	1005	-12.57	cGTCACGTTAT--TATGAAGta	x|||||||x||xx:x||||:xx	tCAGTGCACTACAGAACTTTgt	-
bta-miR-148a	ENSBTAT00000046279	ENSBTAG00000021077	160	187	-21.76	aGTCACGTTCTTCGTCGGTCTAGGAAct	x|||||||xx|xxxxxx||||x|:||xx	tCAGTGCACTA------CAGAACTTTgt	BOLA-DQB
bta-miR-148a	ENSBTAT00000046411	ENSBTAG00000015381	1897	1917	-14.01	tGTCACGTCAT-TCTTAAccgt	x|||||||x||x||||x|xxxx	tCAGTGCACTACAGAACTttgt	ARHGAP18
bta-miR-148a	ENSBTAT00000046446	ENSBTAG00000032704	661	682	-17.83	tGTCACGTGAATACTCGAGtcc	x|||||||||xxx||x||:xxx	tCAGTGCACTACAGAACTTtgt	NAPB
bta-miR-148a	ENSBTAT00000046646	ENSBTAG00000010264	1416	1437	-13.19	gGTCACGTccctccgctctcgt	x|||||||xxxxxxxxxxxxxx	tCAGTGCActacagaactttgt	FBXL18
bta-miR-148a	ENSBTAT00000046647	ENSBTAG00000032858	368	390	-20.12	cGTCACGTGAGGGTCCTcctgta	x|||||||||x|x||x|xxxxxx	tCAGTGCACTAC-AGAActttgt	DYDC1
bta-miR-148a	ENSBTAT00000046801	ENSBTAG00000032964	13	33	-15.27	tGTCACGTC-TCCTTTGtgtca	x|||||||xx|xx:|||xxxxx	tCAGTGCACTACAGAACtttgt	C24H18orf25
bta-miR-148a	ENSBTAT00000046847	ENSBTAG00000014054	138	158	-12.72	tGTCACGT-ATATTTactctta	x|||||||x||x|:|xxxxxxx	tCAGTGCACTACAGAactttgt	CFAP206
bta-miR-148a	ENSBTAT00000046864	ENSBTAG00000005404	388	409	-11.44	cGTCACGTttcagcacggtagt	x|||||||xxxxxxxxxxxxxx	tCAGTGCActacagaactttgt	MSC
bta-miR-148a	ENSBTAT00000046865	ENSBTAG00000011515	183	205	-16.04	aGTCACGTAAATGTaaggtatca	x|||||||x|x|||xxxxxxxxx	tCAGTGCACT-ACAgaactttgt	SELL
bta-miR-148a	ENSBTAT00000046902	ENSBTAG00000002689	160	181	-12.25	tGTCACGTtttaggtacaagat	x|||||||xxxxxxxxxxxxxx	tCAGTGCActacagaactttgt	NME7
bta-miR-148a	ENSBTAT00000046931	ENSBTAG00000007890	1073	1096	-16.9	gGTCACGTTGAAGCTGTTtcagta	x|||||||x||x|x|x||xxxxxx	tCAGTGCA-CTAC-AGAActttgt	SEC14L5
bta-miR-148a	ENSBTAT00000047079	ENSBTAG00000019246	534	555	-12.11	cGTCACGTAGTtaaattaattt	x|||||||x:|xxxxxxxxxxx	tCAGTGCACTAcagaactttgt	SC5D
bta-miR-148a	ENSBTAT00000047180	ENSBTAG00000033214	168	189	-15.43	cGTCACGTTATGTaccacacgt	x|||||||x||||xxxxxxxxx	tCAGTGCACTACAgaactttgt	TBC1D19
bta-miR-148a	ENSBTAT00000047389	ENSBTAG00000010916	1693	1714	-12.02	tGTCACGTccccgggctcgtac	x|||||||xxxxxxxxxxxxxx	tCAGTGCActacagaactttgt	LHFPL4
bta-miR-148a	ENSBTAT00000047448	ENSBTAG00000019686	492	513	-11.41	cGTCACGTCATcctcgcccgac	x|||||||x||xxxxxxxxxxx	tCAGTGCACTAcagaactttgt	NCKAP1L
bta-miR-148a	ENSBTAT00000047737	ENSBTAG00000033603	290	315	-23.37	aGTCACGTTCACGACGTCTTAGAGcg	x|||||||xxxx||x|||||x:|:xx	tCAGTGCA----CTACAGAACTTTgt	IP6K3
bta-miR-148a	ENSBTAT00000047815	ENSBTAG00000033657	2647	2668	-13.22	gGTCACGTtcaacagtacctca	x|||||||xxxxxxxxxxxxxx	tCAGTGCActacagaactttgt	SLC35F1
bta-miR-148a	ENSBTAT00000047833	ENSBTAG00000007923	496	517	-18.71	tGTCACGTGTTGTTATatatgt	x||||||||x|||:x|xxxxxx	tCAGTGCACTACAGAActttgt	LAMTOR3
bta-miR-148a	ENSBTAT00000047858	ENSBTAG00000033690	18	38	-14.03	tGTCACGTTA-GTGATCCAAta	x|||||||x|x||xx|xx||xx	tCAGTGCACTACAGAACTTTgt	BARD1
bta-miR-148a	ENSBTAT00000048106	ENSBTAG00000033902	309	332	-13.76	cGTCACGTAAGAAGTTTAGGTAgg	x|||||||xx||x||:|x|:x|xx	tCAGTGCA--CTACAGAACTTTgt	SLC25A32
bta-miR-148a	ENSBTAT00000048212	ENSBTAG00000033983	294	317	-13.54	cGTCACGTCAAAAGTCATtcttac	x|||||||x|xxx|||x|xxxxxx	tCAGTGCACTA--CAGAActttgt	MAP2K1
bta-miR-148a	ENSBTAT00000048214	ENSBTAG00000003185	1291	1312	-13.19	tGTCACGTTAAGTATCGtcgca	x|||||||x|x||x|x|xxxxx	tCAGTGCACTACAGAACtttgt	ASAP1
bta-miR-148a	ENSBTAT00000048226	ENSBTAG00000010498	1156	1179	-13.81	aGTCACGTTACATAACGTCAGAgg	x|||||||x|xx|xx|x|x|:|xx	tCAGTGCACTACA--GAACTTTgt	SLC40A1
bta-miR-148a	ENSBTAT00000048374	ENSBTAG00000004745	785	806	-12.72	tGTCACGTAAaccaagaacgta	x|||||||x|xxxxxxxxxxxx	tCAGTGCACTacagaactttgt	NAA15
bta-miR-148a	ENSBTAT00000048615	ENSBTAG00000009851	907	928	-17.98	tGTCACGTAATGTTTTtgtttt	x|||||||x||||:||xxxxxx	tCAGTGCACTACAGAActttgt	ROBO1
bta-miR-148a	ENSBTAT00000048730	ENSBTAG00000034402	410	431	-16.87	tGTCACGTACGGTCcgaggtgg	x|||||||xxx|||xxxxxxxx	tCAGTGCACTACAGaactttgt	ACE2
bta-miR-148a	ENSBTAT00000049153	ENSBTAG00000025320	21	41	-21.55	tGTCACGTTTTGTCT-GAGGtc	x|||||||xx|||||x||::xx	tCAGTGCACTACAGAACTTTgt	AKAP1
bta-miR-148a	ENSBTAT00000049195	ENSBTAG00000007444	33	54	-21.64	gGTCACGTGTCGTCagtggttg	x||||||||xx|||xxxxxxxx	tCAGTGCACTACAGaactttgt	MAP3K7CL
bta-miR-148a	ENSBTAT00000049235	ENSBTAG00000034776	2153	2174	-14.59	tGTCACGTCTTATTCTAAGAca	x|||||||xx|x|:x|x|:|xx	tCAGTGCACTACAGAACTTTgt	DDAH1
bta-miR-148a	ENSBTAT00000049280	ENSBTAG00000034823	1237	1262	-15.81	cGTCACGTCACTGTGGACGTGAGtct	x|||||||x|x|||xxx|x|||:xxx	tCAGTGCACT-ACA---GAACTTtgt	AGGF1
bta-miR-148a	ENSBTAT00000049542	ENSBTAG00000035072	23	44	-14.38	gGTCACGTcccacccaagagga	x|||||||xxxxxxxxxxxxxx	tCAGTGCActacagaactttgt	SYCE1
bta-miR-148a	ENSBTAT00000049552	ENSBTAG00000018575	2028	2054	-21.18	tGTCACGTCTCCTTTTGTCTTGATAtt	x|||||||xxxxxxx||||||||x|xx	tCAGTGCACT-----ACAGAACTTTgt	TRHDE
bta-miR-148a	ENSBTAT00000049576	ENSBTAG00000012242	389	410	-18.15	aGTCACGTGcgacgggttaccc	x||||||||xxxxxxxxxxxxx	tCAGTGCACtacagaactttgt	MAF1
bta-miR-148a	ENSBTAT00000049716	ENSBTAG00000003975	43	65	-19.46	aGTCACGTCGAGGggggcgtgcg	x|||||||x||x|xxxxxxxxxx	tCAGTGCA-CTACagaactttgt	LMAN2L
bta-miR-148a	ENSBTAT00000049793	ENSBTAG00000010775	1515	1538	-16.77	gGTCACGTCCTTGGTTTTTGAtcc	x|||||||xx|xx||:||x:|xxx	tCAGTGCACTA--CAGAACTTtgt	POGK
bta-miR-148a	ENSBTAT00000050226	ENSBTAG00000035744	493	516	-15.05	gGTCACGTTCATTGACTGGAccct	x|||||||xx||x|x||x||xxxx	tCAGTGCAC-TA-CAGAACTttgt	TRIM26
bta-miR-148a	ENSBTAT00000050484	ENSBTAG00000002136	27	48	-15.96	cGTCACGTctcggccccggtcg	x|||||||xxxxxxxxxxxxxx	tCAGTGCActacagaactttgt	FCHO1
bta-miR-148a	ENSBTAT00000050520	ENSBTAG00000004791	5	26	-14.78	cGTCACGTCAGGgaacgaggac	x|||||||x|x|xxxxxxxxxx	tCAGTGCACTACagaactttgt	VPS26C
bta-miR-148a	ENSBTAT00000050675	ENSBTAG00000036183	58	79	-15.95	tGTCACGTGGgccccaacgaga	x||||||||:xxxxxxxxxxxx	tCAGTGCACTacagaactttgt	FBXW8
bta-miR-148a	ENSBTAT00000051818	ENSBTAG00000034978	412	434	-12.72	tGTCACGTAATCACTATGttcaa	x|||||||x||xx||x||xxxxx	tCAGTGCACTACAGA-ACtttgt	FAM168B
bta-miR-148a	ENSBTAT00000051993	ENSBTAG00000020658	389	411	-19.02	cGTCACGTGAAAATATTAGGAca	x|||||||||xxx|x||x::|xx	tCAGTGCACTAC-AGAACTTTgt	LNX1
bta-miR-148a	ENSBTAT00000052023	ENSBTAG00000024443	165	186	-15.91	cGTCACGTTCCATCTTAAActt	x|||||||xxxx||||x||xxx	tCAGTGCACTACAGAACTTtgt	TATDN3
bta-miR-148a	ENSBTAT00000052306	ENSBTAG00000004271	35	56	-13.56	aGTCACGTttaaatatgtgtgt	x|||||||xxxxxxxxxxxxxx	tCAGTGCActacagaactttgt	UBAP2L
bta-miR-148a	ENSBTAT00000052382	ENSBTAG00000008734	254	275	-17.21	gGTCACGTTCCGTCTgttcggt	x|||||||xxx||||xxxxxxx	tCAGTGCACTACAGAactttgt	PM20D1
bta-miR-148a	ENSBTAT00000052388	ENSBTAG00000005434	248	270	-14.32	aGTCACGTAGAcactgcagtagt	x|||||||x||xxxxxxxxxxxx	tCAGTGCA-CTacagaactttgt	PLVAP
bta-miR-148a	ENSBTAT00000052707	ENSBTAG00000039819	403	424	-16.44	cGTCACGTGTAACCTTccgggg	x||||||||xxxx|||xxxxxx	tCAGTGCACTACAGAActttgt	RPH3AL
bta-miR-148a	ENSBTAT00000052919	ENSBTAG00000018732	404	424	-24.39	aGTCACGTGA-GACGGGAAAcc	x|||||||||x|x|xx||||xx	tCAGTGCACTACAGAACTTTgt	HSPA12B
bta-miR-148a	ENSBTAT00000052924	ENSBTAG00000037883	120	139	-13.11	tGTCACGTTACAT--TGAccat	x|||||||x|xx|xx|||xxxx	tCAGTGCACTACAGAACTttgt	PPP1R2C
bta-miR-148a	ENSBTAT00000052937	ENSBTAG00000004999	712	732	-16.33	tGTCACGTTCT-TTTTGAttct	x|||||||xx|x|:||||xxxx	tCAGTGCACTACAGAACTttgt	RESF1
bta-miR-148a	ENSBTAT00000053008	ENSBTAG00000037996	1238	1258	-14.39	tGTCACGTACTA-CTTGTAGta	x|||||||xx|xx||||x|:xx	tCAGTGCACTACAGAACTTTgt	ARMCX3
bta-miR-148a	ENSBTAT00000053355	ENSBTAG00000010727	234	257	-21.8	gGTCACGTTTGATGTCATGcctca	x|||||||xx||||||x||xxxxx	tCAGTGCA--CTACAGAACtttgt	ATG4D
bta-miR-148a	ENSBTAT00000053426	ENSBTAG00000003994	514	535	-14.81	cGTCACGTccggggaacttcta	x|||||||xxxxxxxxxxxxxx	tCAGTGCActacagaactttgt	IGFBP3
bta-miR-148a	ENSBTAT00000053492	ENSBTAG00000003439	715	736	-19.98	tGTCACGTctcccaccggggag	x|||||||xxxxxxxxxxxxxx	tCAGTGCActacagaactttgt	AKAP10
bta-miR-148a	ENSBTAT00000053508	ENSBTAG00000017038	527	549	-19.17	gGTCACGTGGCTGgggggtcctc	x||||||||:x||xxxxxxxxxx	tCAGTGCACT-ACagaactttgt	HPS4
bta-miR-148a	ENSBTAT00000053585	ENSBTAG00000040190	136	159	-15.1	gGTCACGTCCGGTACCTcctaggt	x|||||||xx|:|xx||xxxxxxx	tCAGTGCA--CTACAGAactttgt	CCDC88B
bta-miR-148a	ENSBTAT00000053650	ENSBTAG00000038156	1724	1747	-14.97	tGTCACGTCCTTCTATTAGAAAta	x|||||||xx|xx|x||x||||xx	tCAGTGCACTAC-AGAA-CTTTgt	DYNLT3
bta-miR-148a	ENSBTAT00000053671	ENSBTAG00000018861	1097	1123	-19.54	tGTCACGTCTTCCGAGTCTGTGAAAga	x|||||||xx|xxxx||||x|||||xx	tCAGTGCACTA----CAGA-ACTTTgt	C5H12orf56
bta-miR-148a	ENSBTAT00000053713	ENSBTAG00000014601	111	132	-21.65	cGTCACGTGACGTCTattttat	x|||||||||x||||xxxxxxx	tCAGTGCACTACAGAactttgt	SGCB
bta-miR-148a	ENSBTAT00000053880	ENSBTAG00000019986	260	281	-16.55	aGTCACGTCGGGGCcgctaccg	x|||||||x:x|x|xxxxxxxx	tCAGTGCACTACAGaactttgt	CSNK1D
bta-miR-148a	ENSBTAT00000054020	ENSBTAG00000039886	971	991	-13.45	gGTCACGTC-TATCTgcattct	x|||||||xx|x|||xxxxxxx	tCAGTGCACTACAGAactttgt	-
bta-miR-148a	ENSBTAT00000054027	ENSBTAG00000013591	380	401	-12.05	tGTCACGTTACATTTTAAAtta	x|||||||x|xx|:||x||xxx	tCAGTGCACTACAGAACTTtgt	CYB5R4
bta-miR-148a	ENSBTAT00000054090	ENSBTAG00000038660	134	155	-16.8	tGTCACGTAATGTGTCCCAAga	x|||||||x||||x|xxx||xx	tCAGTGCACTACAGAACTTTgt	MGC134232
bta-miR-148a	ENSBTAT00000054299	ENSBTAG00000025146	117	137	-13.17	tGTCACGTCA-GTTTATAAttt	x|||||||x|x||:|xx||xxx	tCAGTGCACTACAGAACTTtgt	-
bta-miR-148a	ENSBTAT00000054382	ENSBTAG00000008636	953	972	-12.77	cGTCACGT--TCTCTTtctgcc	x|||||||xx|x||||xxxxxx	tCAGTGCACTACAGAActttgt	PDE4B
bta-miR-148a	ENSBTAT00000054397	ENSBTAG00000009470	357	378	-20.56	tGTCACGTGGAGTTTTCAAGac	x||||||||:x||:||x||:xx	tCAGTGCACTACAGAACTTTgt	CLIC4
bta-miR-148a	ENSBTAT00000054463	ENSBTAG00000038322	502	523	-16.7	gGTCACGTCCTCTGTgtccaag	x|||||||xx|x|x|xxxxxxx	tCAGTGCACTACAGAactttgt	-
bta-miR-148a	ENSBTAT00000054576	ENSBTAG00000017179	2004	2025	-13.22	gGTCACGTTCAATTTCGAccaa	x|||||||xxxx|:|x||xxxx	tCAGTGCACTACAGAACTttgt	USP12
bta-miR-148a	ENSBTAT00000054801	ENSBTAG00000039190	753	777	-17.24	tGTCACGTCTTCCGGTCTccggtgg	x|||||||xx|xxx||||xxxxxxx	tCAGTGCACTA---CAGAactttgt	SLC9A5
bta-miR-148a	ENSBTAT00000054956	ENSBTAG00000037375	752	773	-11.69	cGTCACGTtttactccgtcaag	x|||||||xxxxxxxxxxxxxx	tCAGTGCActacagaactttgt	-
bta-miR-148a	ENSBTAT00000055062	ENSBTAG00000037765	1437	1458	-11.41	cGTCACGTccactcaaaagatc	x|||||||xxxxxxxxxxxxxx	tCAGTGCActacagaactttgt	TNFAIP8L1
bta-miR-148a	ENSBTAT00000055094	ENSBTAG00000017024	275	297	-13.24	tGTCACGT-ATCGACATTGttttt	x|||||||x||x|x|x|||xxxxx	tCAGTGCACTA-CAG-AACtttgt	PPARGC1A
bta-miR-148a	ENSBTAT00000055200	ENSBTAG00000033298	630	652	-14	tGTCACGTTGAcactcccgagcc	x|||||||x||xxxxxxxxxxxx	tCAGTGCA-CTacagaactttgt	LYRM9
bta-miR-148a	ENSBTAT00000055368	ENSBTAG00000020796	671	693	-12.98	cGTCACGTTAATTAAGTGTAAca	x|||||||x|xx|xxx||x||xx	tCAGTGCACTACAGA-ACTTTgt	UBE2D1
bta-miR-148a	ENSBTAT00000055373	ENSBTAG00000038112	106	131	-17.72	aGTCACGTCTCTGACGTAGTGAGttg	x|||||||xxxx||x||xx|||:xxx	tCAGTGCA----CTACAGAACTTtgt	-
bta-miR-148a	ENSBTAT00000055494	ENSBTAG00000032914	1048	1072	-18.41	gGTCACGTTGGGACGTCTctcttga	x|||||||xxx||x||||xxxxxxx	tCAGTGCA---CTACAGAactttgt	SLC11A2
bta-miR-148a	ENSBTAT00000055559	ENSBTAG00000019839	21	45	-16.15	tGTCACGTCTCATATGTCC-GAAtcc	x|||||||xxxxx|||||xx|||xxx	tCAGTGCAC----TACAGAACTTtgt	LTBP1
bta-miR-148a	ENSBTAT00000055572	ENSBTAG00000039366	616	637	-13.07	tGTCACGTCATTTaggtccttt	x|||||||x||x|xxxxxxxxx	tCAGTGCACTACAgaactttgt	-
bta-miR-148a	ENSBTAT00000055739	ENSBTAG00000011689	260	281	-17.3	aGTCACGTAGGGACCGGAGGtc	x|||||||x:x|x|xx||::xx	tCAGTGCACTACAGAACTTTgt	LENG8
bta-miR-148a	ENSBTAT00000055769	ENSBTAG00000006025	53	75	-15.21	aGTCACGTTGATAACGTatcaca	x|||||||x|||xx|x|xxxxxx	tCAGTGCA-CTACAGAActttgt	AHSA2
bta-miR-148a	ENSBTAT00000055962	ENSBTAG00000005832	452	473	-14.95	aGTCACGTccggacacagggtc	x|||||||xxxxxxxxxxxxxx	tCAGTGCActacagaactttgt	GRK2
bta-miR-148a	ENSBTAT00000056141	ENSBTAG00000003525	670	691	-15.2	gGTCACGTttggagagctctac	x|||||||xxxxxxxxxxxxxx	tCAGTGCActacagaactttgt	STXBP1
bta-miR-148a	ENSBTAT00000056305	ENSBTAG00000010658	357	377	-23.17	gGTCACGTG-TGTCTTcgtccc	x||||||||x||||||xxxxxx	tCAGTGCACTACAGAActttgt	PFKL
bta-miR-148a	ENSBTAT00000056351	ENSBTAG00000010756	600	620	-17.62	tGTCACGTT-TGTCGTGCAcgt	x|||||||xx||||x||x|xxx	tCAGTGCACTACAGAACTTtgt	ST7
bta-miR-148a	ENSBTAT00000056886	ENSBTAG00000048246	55	76	-12.02	tGTCACGTCAAAACTctattac	x|||||||x|xxx||xxxxxxx	tCAGTGCACTACAGAactttgt	DPP4
bta-miR-148a	ENSBTAT00000056888	ENSBTAG00000039397	159	181	-21.62	cGTCACGTCGGGTCACTGAGAcc	x|||||||x:x|||xx|||:|xx	tCAGTGCACTACAGA-ACTTTgt	WNT3A
bta-miR-148a	ENSBTAT00000056926	ENSBTAG00000039635	1428	1451	-19.74	aGTCACGTCGTAGTCCGTGGAccg	x|||||||x:|x|||xx||:|xxx	tCAGTGCACTA-CAGA-ACTTtgt	CCDC97
bta-miR-148a	ENSBTAT00000056960	ENSBTAG00000037907	352	373	-12.11	cGTCACGTactccaagacccga	x|||||||xxxxxxxxxxxxxx	tCAGTGCActacagaactttgt	DSEL
bta-miR-148a	ENSBTAT00000056997	ENSBTAG00000040555	161	182	-13.53	aGTCACGTcccccatctctcac	x|||||||xxxxxxxxxxxxxx	tCAGTGCActacagaactttgt	FBXL19
bta-miR-148a	ENSBTAT00000057011	ENSBTAG00000039068	346	365	-14.46	aGTCACGT--TTTCTCGGGtgc	x|||||||xx|x|||x|::xxx	tCAGTGCACTACAGAACTTtgt	CSMD3
bta-miR-148a	ENSBTAT00000057219	ENSBTAG00000005957	232	253	-12.66	tGTCACGTttacgaggttagtt	x|||||||xxxxxxxxxxxxxx	tCAGTGCActacagaactttgt	CSE1L
bta-miR-148a	ENSBTAT00000057293	ENSBTAG00000037951	76	97	-15.76	gGTCACGTCGGGGCgaccacag	x|||||||x:x|x|xxxxxxxx	tCAGTGCACTACAGaactttgt	KLHL6
bta-miR-148a	ENSBTAT00000057596	ENSBTAG00000040028	736	754	-13.32	cGTCACGT--TC-CTTGGccaa	x|||||||xx|xx||||:xxxx	tCAGTGCACTACAGAACTttgt	-
bta-miR-148a	ENSBTAT00000060940	ENSBTAG00000015887	708	732	-14.62	tGTCACGTCTGAATCTTTTtgtcta	x|||||||xx||x|x|:||xxxxxx	tCAGTGCA--CT-ACAGAActttgt	FOXJ3
bta-miR-148a	ENSBTAT00000060955	ENSBTAG00000012278	1322	1344	-18.61	aGTCACGTTTGGCTCTTTGAGga	x|||||||xxx|x||||x:|:xx	tCAGTGCACTAC-AGAACTTTgt	MTMR12
bta-miR-148a	ENSBTAT00000060959	ENSBTAG00000047991	681	703	-12.05	tGTCACGTTCATTTTATCTAAat	x|||||||xx||x|:x|xx||xx	tCAGTGCAC-TACAGAACTTTgt	TAF4
bta-miR-148a	ENSBTAT00000060980	ENSBTAG00000033225	198	219	-17.71	aGTCACGTAACGTCTCAAAGgt	x|||||||x|x||||xx||:xx	tCAGTGCACTACAGAACTTTgt	CNTN4
bta-miR-148a	ENSBTAT00000060989	ENSBTAG00000044169	1282	1305	-18.16	aGTCACGTGATTTACCTTTTAAaa	x||||||||||x|xx|||xx||xx	tCAGTGCACTACA--GAACTTTgt	PRELID2
bta-miR-148a	ENSBTAT00000061002	ENSBTAG00000024015	158	175	-14.4	cGTCACGT----TCGTCAAAat	x|||||||xxxx||x|x|||xx	tCAGTGCACTACAGAACTTTgt	PTPRM
bta-miR-148a	ENSBTAT00000061035	ENSBTAG00000006784	134	155	-20.4	cGTCACGTGGgacccctcgggg	x||||||||:xxxxxxxxxxxx	tCAGTGCACTacagaactttgt	PLA2G4B
bta-miR-148a	ENSBTAT00000061102	ENSBTAG00000027064	755	777	-13.03	cGTCACGTCGAgaaaacacattg	x|||||||x||xxxxxxxxxxxx	tCAGTGCA-CTacagaactttgt	BTBD11
bta-miR-148a	ENSBTAT00000061141	ENSBTAG00000011644	1459	1480	-14.34	cGTCACGTAAgagaaaggtcga	x|||||||x|xxxxxxxxxxxx	tCAGTGCACTacagaactttgt	THSD4
bta-miR-148a	ENSBTAT00000061193	ENSBTAG00000044019	466	487	-12.02	tGTCACGTcccactccgtaccg	x|||||||xxxxxxxxxxxxxx	tCAGTGCActacagaactttgt	KAT2A
bta-miR-148a	ENSBTAT00000061216	ENSBTAG00000020281	638	660	-12.02	tGTCACGTCAACTCATTTActca	x|||||||x|xx||x||x|xxxx	tCAGTGCACTACAG-AACTttgt	NIN
bta-miR-148a	ENSBTAT00000061220	ENSBTAG00000017797	10	34	-17.76	aGTCACGTTTAATCGTTTGGAGAtc	x|||||||xxx||x||:|x||:|xx	tCAGTGCAC--TA-CAGAACTTTgt	LY75
bta-miR-148a	ENSBTAT00000061264	ENSBTAG00000009851	907	928	-17.98	tGTCACGTAATGTTTTtgtttt	x|||||||x||||:||xxxxxx	tCAGTGCACTACAGAActttgt	ROBO1
bta-miR-148a	ENSBTAT00000061325	ENSBTAG00000037456	360	380	-15.15	aGTCACGT-ATGaacgtccccg	x|||||||x|||xxxxxxxxxx	tCAGTGCACTACagaactttgt	AHDC1
bta-miR-148a	ENSBTAT00000061326	ENSBTAG00000038306	1708	1730	-18.71	cGTCACGTGACCGTAGAGAGGta	x|||||||||xx||xxx||::xx	tCAGTGCACTA-CAGAACTTTgt	CBX2
bta-miR-148a	ENSBTAT00000061359	ENSBTAG00000044071	2400	2421	-11.41	cGTCACGTctacgaagaggaga	x|||||||xxxxxxxxxxxxxx	tCAGTGCActacagaactttgt	HRH2
bta-miR-148a	ENSBTAT00000061370	ENSBTAG00000040128	772	792	-14.51	cGTCACGTT-TGTAAGGATAtt	x|||||||xx|||xxx||x|xx	tCAGTGCACTACAGAACTTTgt	FZD4
bta-miR-148a	ENSBTAT00000061378	ENSBTAG00000044048	124	145	-13.85	cGTCACGTcttccgagtcgagg	x|||||||xxxxxxxxxxxxxx	tCAGTGCActacagaactttgt	LMBR1L
bta-miR-148a	ENSBTAT00000061420	ENSBTAG00000044197	136	159	-15.99	gGTCACGTCCGAGGTacccaagct	x|||||||xx||x||xxxxxxxxx	tCAGTGCA--CTACAgaactttgt	EDARADD
bta-miR-148a	ENSBTAT00000061441	ENSBTAG00000013236	1421	1444	-13.22	tGTCACGTCCACAGTTTTagtttc	x|||||||xx|xx||:||xxxxxx	tCAGTGCAC-TA-CAGAActttgt	MED1
bta-miR-148a	ENSBTAT00000061554	ENSBTAG00000044032	335	356	-13.74	gGTCACGTccactaccgacgtg	x|||||||xxxxxxxxxxxxxx	tCAGTGCActacagaactttgt	KDM2A
bta-miR-148a	ENSBTAT00000061568	ENSBTAG00000011451	340	363	-20.07	aGTCACGTGACCCGTCCTttccgg	x|||||||||xxx|||x|xxxxxx	tCAGTGCACTA--CAGAActttgt	RTN1
bta-miR-148a	ENSBTAT00000061581	ENSBTAG00000016254	1361	1382	-14.76	tGTCACGTACTATTTGGACAcc	x|||||||xx|x|:|x||x|xx	tCAGTGCACTACAGAACTTTgt	HDAC5
bta-miR-148a	ENSBTAT00000061601	ENSBTAG00000044075	1036	1056	-19.24	aGTCACGTG-TCTCagaggaca	x||||||||x|x||xxxxxxxx	tCAGTGCACTACAGaactttgt	SRPRB
bta-miR-148a	ENSBTAT00000061615	ENSBTAG00000043981	822	843	-14.12	aGTCACGTtcaccgacaaaaca	x|||||||xxxxxxxxxxxxxx	tCAGTGCActacagaactttgt	SBF2
bta-miR-148a	ENSBTAT00000061645	ENSBTAG00000044074	165	187	-15.6	aGTCACGTTGTTTCGTTGTAGtt	x|||||||x:|x||x|||x|:xx	tCAGTGCACTACAG-AACTTTgt	MLLT10
bta-miR-148a	ENSBTAT00000063022	ENSBTAG00000048062	1194	1216	-13.07	tGTCACGTCACGCTCccccgccc	x|||||||x|x|x||xxxxxxxx	tCAGTGCACTAC-AGaactttgt	KDM6B
bta-miR-148a	ENSBTAT00000063175	ENSBTAG00000010704	265	286	-12.39	cGTCACGTCTTTTaactcacga	x|||||||xx|x|xxxxxxxxx	tCAGTGCACTACAgaactttgt	LRRC4
bta-miR-148a	ENSBTAT00000063222	ENSBTAG00000015335	27	49	-18.46	aGTCACGTTTATGTaaaacagag	x|||||||xx||||xxxxxxxxx	tCAGTGCAC-TACAgaactttgt	ADGRB3
bta-miR-148a	ENSBTAT00000063271	ENSBTAG00000047807	1872	1895	-15.56	aGTCACGTCCGACGTTTattcctc	x|||||||xx||x||:|xxxxxxx	tCAGTGCA--CTACAGAactttgt	SAPCD2
bta-miR-148a	ENSBTAT00000063492	ENSBTAG00000046282	705	726	-14.21	gGTCACGTTAacgttaacaaca	x|||||||x|xxxxxxxxxxxx	tCAGTGCACTacagaactttgt	VGLL2
bta-miR-148a	ENSBTAT00000063564	ENSBTAG00000021697	936	961	-18.76	cGTCACGTGTGGGACATGTTGGAAtg	x||||||||xx|xxxx|x|||:||xx	tCAGTGCACTAC----AGAACTTTgt	PDGFB
bta-miR-148a	ENSBTAT00000063565	ENSBTAG00000014933	41	62	-12.9	tGTCACGTttagaaaggaagta	x|||||||xxxxxxxxxxxxxx	tCAGTGCActacagaactttgt	TRAK2
bta-miR-148a	ENSBTAT00000063585	ENSBTAG00000001000	1882	1903	-12.72	tGTCACGTAAaccaacgttcgt	x|||||||x|xxxxxxxxxxxx	tCAGTGCACTacagaactttgt	CA13
bta-miR-148a	ENSBTAT00000063873	ENSBTAG00000046160	252	274	-14.88	gGTCACGTTCTTTTCTTcgggtt	x|||||||xx|x|x|||xxxxxx	tCAGTGCACTACA-GAActttgt	SMIM13
bta-miR-148a	ENSBTAT00000063954	ENSBTAG00000045923	763	786	-22.67	tGTCACGTGAACTGTCTTctataa	x|||||||||xx||||||xxxxxx	tCAGTGCACT--ACAGAActttgt	BOLA-DYB
bta-miR-148a	ENSBTAT00000063984	ENSBTAG00000019832	481	502	-15.63	gGTCACGTccctcaatgatgca	x|||||||xxxxxxxxxxxxxx	tCAGTGCActacagaactttgt	TGFBR2
bta-miR-148a	ENSBTAT00000064008	ENSBTAG00000015007	2119	2141	-19.96	tGTCACGTTAATATTTTGGAAct	x|||||||x|x|x|:|||:||xx	tCAGTGCACT-ACAGAACTTTgt	NCOA1
bta-miR-148a	ENSBTAT00000064055	ENSBTAG00000048059	908	929	-14.89	gGTCACGTCGTccccgttcctc	x|||||||x:|xxxxxxxxxxx	tCAGTGCACTAcagaactttgt	TMEM86A
bta-miR-148a	ENSBTAT00000064116	ENSBTAG00000047818	364	386	-23.55	gGTCACGTGAACTCTCTGAAAgt	x|||||||||xx|||x|||||xx	tCAGTGCACTACAGA-ACTTTgt	TAFA2
bta-miR-148a	ENSBTAT00000064228	ENSBTAG00000017999	369	392	-13.56	aGTCACGTTTCAATTTTCGAGtat	x|||||||xxx|xx|:|x||:xxx	tCAGTGCAC--TACAGAACTTtgt	TNRC6A
bta-miR-148a	ENSBTAT00000064339	ENSBTAG00000046752	190	210	-12.53	tGTCACGTCCC-TCTTccctcc	x|||||||xxxx||||xxxxxx	tCAGTGCACTACAGAActttgt	-
bta-miR-148a	ENSBTAT00000064348	ENSBTAG00000046413	596	615	-11.44	cGTCACGT--TCTCATCAAAat	x|||||||xx|x||x|x|||xx	tCAGTGCACTACAGAACTTTgt	GRID2
bta-miR-148a	ENSBTAT00000064387	ENSBTAG00000047502	1165	1187	-14.97	aGTCACGTCCTTTTCTTtcgatg	x|||||||xx|x|x|||xxxxxx	tCAGTGCACTACA-GAActttgt	FKBP5
bta-miR-148a	ENSBTAT00000064388	ENSBTAG00000002559	90	111	-13.46	cGTCACGTccacccggacaccc	x|||||||xxxxxxxxxxxxxx	tCAGTGCActacagaactttgt	MIOX
bta-miR-148a	ENSBTAT00000064452	ENSBTAG00000045664	124	145	-13.56	aGTCACGTTCCCTTTTtccttt	x|||||||xxxx|:||xxxxxx	tCAGTGCACTACAGAActttgt	LRRC41
bta-miR-148a	ENSBTAT00000064463	ENSBTAG00000007588	263	283	-16.39	gGTCACGTCC-GTCATAGAAtc	x|||||||xxx|||x|x:||xx	tCAGTGCACTACAGAACTTTgt	ERLIN1
bta-miR-148a	ENSBTAT00000064484	ENSBTAG00000017505	182	203	-15.87	cGTCACGTCTGGTCcgggtgtg	x|||||||xxx|||xxxxxxxx	tCAGTGCACTACAGaactttgt	PAXIP1
bta-miR-148a	ENSBTAT00000064561	ENSBTAG00000010299	1183	1203	-21.3	aGTCACGTGTT-TCTTGtggta	x||||||||x|x|||||xxxxx	tCAGTGCACTACAGAACtttgt	NOL4
bta-miR-148a	ENSBTAT00000064640	ENSBTAG00000047416	595	621	-21.58	aGTCACGTTGACATGGTTCTTGAAcct	x|||||||x||xx||xx|||||||xxx	tCAGTGCA-CT--AC--AGAACTTtgt	HEPH
bta-miR-148a	ENSBTAT00000064655	ENSBTAG00000014062	434	456	-17.89	gGTCACGTCGCTGgtgctgtcac	x|||||||x|x||xxxxxxxxxx	tCAGTGCA-CTACagaactttgt	FRMD1
bta-miR-148a	ENSBTAT00000064684	ENSBTAG00000047358	482	503	-17.88	cGTCACGTGtcgggacgacggg	x||||||||xxxxxxxxxxxxx	tCAGTGCACtacagaactttgt	HIGD1C
bta-miR-148a	ENSBTAT00000064711	ENSBTAG00000048107	1544	1565	-17.98	aGTCACGTTCTTTGTcatagta	x|||||||xx|x|x|xxxxxxx	tCAGTGCACTACAGAactttgt	CANX
bta-miR-148a	ENSBTAT00000064861	ENSBTAG00000045946	432	453	-14.23	aGTCACGTAAacaaagaaaaaa	x|||||||x|xxxxxxxxxxxx	tCAGTGCACTacagaactttgt	VMO1
bta-miR-148a	ENSBTAT00000064879	ENSBTAG00000018575	2028	2054	-21.18	tGTCACGTCTCCTTTTGTCTTGATAtt	x|||||||xxxxxxx||||||||x|xx	tCAGTGCACT-----ACAGAACTTTgt	TRHDE
bta-miR-148a	ENSBTAT00000064950	ENSBTAG00000011481	472	493	-15.67	cGTCACGTTGTCTCTTAAGtcg	x|||||||x:|x||||x|:xxx	tCAGTGCACTACAGAACTTtgt	IL12RB1
bta-miR-148a	ENSBTAT00000065024	ENSBTAG00000046659	42	62	-17.84	aGTCACGT-ATccatcggtgtc	x|||||||x||xxxxxxxxxxx	tCAGTGCACTAcagaactttgt	FOXR2
bta-miR-148a	ENSBTAT00000065057	ENSBTAG00000011997	143	164	-15.41	gGTCACGTCACGCCggaggtcg	x|||||||x|x|x|xxxxxxxx	tCAGTGCACTACAGaactttgt	ZMIZ2
bta-miR-148a	ENSBTAT00000065067	ENSBTAG00000001707	860	880	-15.23	tGTCACGTAAT-TTTCGGAcac	x|||||||x||x|:|x|:|xxx	tCAGTGCACTACAGAACTTtgt	UIMC1
bta-miR-148a	ENSBTAT00000065092	ENSBTAG00000046129	71	92	-15.07	aGTCACGTttacaggtccctaa	x|||||||xxxxxxxxxxxxxx	tCAGTGCActacagaactttgt	RAB34
bta-miR-148a	ENSBTAT00000065241	ENSBTAG00000008348	4312	4333	-14.23	aGTCACGTAAA-TCGTTCAttat	x|||||||x|xx||x||x|xxxx	tCAGTGCACTACAG-AACTttgt	NOL4L
bta-miR-148a	ENSBTAT00000065278	ENSBTAG00000021253	678	699	-14.86	tGTCACGTttgctgcagcgcac	x|||||||xxxxxxxxxxxxxx	tCAGTGCActacagaactttgt	PRDM15
bta-miR-148a	ENSBTAT00000065280	ENSBTAG00000021452	460	481	-12.76	tGTCACGTcggaccccagcccc	x|||||||xxxxxxxxxxxxxx	tCAGTGCActacagaactttgt	TRANK1
bta-miR-148a	ENSBTAT00000065355	ENSBTAG00000031439	287	309	-14.23	aGTCACGTAAATCTCATCAGtaa	x|||||||x|x|x||x|x|:xxx	tCAGTGCACT-ACAGAACTTtgt	CDC14A
bta-miR-148a	ENSBTAT00000065419	ENSBTAG00000045567	585	604	-16.23	tGTCACGT--TGTCaaaattat	x|||||||xx||||xxxxxxxx	tCAGTGCACTACAGaactttgt	PRR15
bta-miR-148a	ENSBTAT00000065475	ENSBTAG00000047191	1369	1389	-11.44	cGTCACGTT-TCTCCTcttttt	x|||||||xx|x||x|xxxxxx	tCAGTGCACTACAGAActttgt	KCNA6
bta-miR-148a	ENSBTAT00000065520	ENSBTAG00000046277	1594	1615	-13.53	aGTCACGTCAcaagtacgcact	x|||||||x|xxxxxxxxxxxx	tCAGTGCACTacagaactttgt	RGS4
bta-miR-148a	ENSBTAT00000065556	ENSBTAG00000051936	709	730	-13.89	gGTCACGTAActtaccagaccc	x|||||||x|xxxxxxxxxxxx	tCAGTGCACTacagaactttgt	-
bta-miR-148a	ENSBTAT00000065558	ENSBTAG00000045901	37	58	-13.89	gGTCACGTCAcccaatctgagg	x|||||||x|xxxxxxxxxxxx	tCAGTGCACTacagaactttgt	CLDN6
bta-miR-148a	ENSBTAT00000065604	ENSBTAG00000046204	234	255	-13.3	tGTCACGTtcaagagagtactg	x|||||||xxxxxxxxxxxxxx	tCAGTGCActacagaactttgt	ZNF705A
bta-miR-148a	ENSBTAT00000065613	ENSBTAG00000004971	990	1011	-18.42	aGTCACGTGAacataaccctct	x|||||||||xxxxxxxxxxxx	tCAGTGCACTacagaactttgt	GRAMD1C
bta-miR-148a	ENSBTAT00000065682	ENSBTAG00000047810	636	657	-14.23	aGTCACGTAAAGaaatcaccca	x|||||||x|x|xxxxxxxxxx	tCAGTGCACTACagaactttgt	CCDC96
bta-miR-148a	ENSBTAT00000065823	ENSBTAG00000020384	1095	1117	-20	tGTCACGTGTCTGTCaagttatt	x||||||||xx||||xxxxxxxx	tCAGTGCACT-ACAGaactttgt	WDR47
bta-miR-148a	ENSBTAT00000065830	ENSBTAG00000046553	71	92	-12.05	tGTCACGTtttacaactctact	x|||||||xxxxxxxxxxxxxx	tCAGTGCActacagaactttgt	SECISBP2L
bta-miR-148a	ENSBTAT00000065890	ENSBTAG00000021318	1070	1090	-15.66	cGTCACGTTA-GACGGGGAcat	x|||||||x|x|x|xx|:|xxx	tCAGTGCACTACAGAACTTtgt	SCAMP5
bta-miR-148a	ENSBTAT00000065971	ENSBTAG00000046549	1379	1400	-18.43	gGTCACGTGccccggctgtcac	x||||||||xxxxxxxxxxxxx	tCAGTGCACtacagaactttgt	BICD2
bta-miR-148a	ENSBTAT00000065976	ENSBTAG00000047707	411	432	-15.96	tGTCACGTCGGT-TTTTGtttgt	x|||||||x|:|x|:|||xxxxx	tCAGTGCA-CTACAGAACtttgt	BOLA-DOB
bta-miR-148a	ENSBTAT00000066075	ENSBTAG00000012564	263	284	-12.38	tGTCACGTctcctccacggtcc	x|||||||xxxxxxxxxxxxxx	tCAGTGCActacagaactttgt	KANSL1
bta-miR-148a	ENSBTAT00000066076	ENSBTAG00000047586	1097	1118	-12.72	tGTCACGTactaaccattctga	x|||||||xxxxxxxxxxxxxx	tCAGTGCActacagaactttgt	NPY1R
bta-miR-148a	ENSBTAT00000066098	ENSBTAG00000047731	58	79	-13.63	gGTCACGTtctccacgactccc	x|||||||xxxxxxxxxxxxxx	tCAGTGCActacagaactttgt	FAM189B
bta-miR-148a	ENSBTAT00000066172	ENSBTAG00000013160	332	355	-17.27	gGTCACGTTGCGTCCCTTGAccta	x|||||||x:x|||xx||||xxxx	tCAGTGCACTACAG--AACTttgt	GFRA4
bta-miR-148a	ENSBTAT00000066213	ENSBTAG00000047706	156	177	-13.53	aGTCACGTCTTTTaattccagt	x|||||||xx|x|xxxxxxxxx	tCAGTGCACTACAgaactttgt	ING2
bta-miR-148a	ENSBTAT00000066270	ENSBTAG00000045808	138	159	-17.26	gGTCACGTacgggactccggat	x|||||||xxxxxxxxxxxxxx	tCAGTGCActacagaactttgt	IL17REL
bta-miR-148a	ENSBTAT00000066388	ENSBTAG00000002287	490	511	-19.69	cGTCACGTAGTGTTGTGAtctc	x|||||||x:|||:x|||xxxx	tCAGTGCACTACAGAACTttgt	CHD9
bta-miR-148a	ENSBTAT00000066393	ENSBTAG00000031439	287	309	-14.23	aGTCACGTAAATCTCATCAGtaa	x|||||||x|x|x||x|x|:xxx	tCAGTGCACT-ACAGAACTTtgt	CDC14A
bta-miR-148a	ENSBTAT00000066433	ENSBTAG00000052924	119	140	-15.59	gGTCACGTACACCTCC-GAAAta	x|||||||xx|xx||xx||||xx	tCAGTGCAC-TACAGAACTTTgt	NKAIN2
bta-miR-148a	ENSBTAT00000066446	ENSBTAG00000010073	1184	1206	-14.86	cGTCACGTCGTAGGTTCGGGGtc	x|||||||x:|x|x:|x|:::xx	tCAGTGCACTA-CAGAACTTTgt	FLOT2
bta-miR-148a	ENSBTAT00000066519	ENSBTAG00000005442	874	894	-15.41	gGTCACGTCG-GTTTaatttta	x|||||||x:x||:|xxxxxxx	tCAGTGCACTACAGAactttgt	DNAI4
bta-miR-148a	ENSBTAT00000066544	ENSBTAG00000010357	723	743	-16.73	gGTCACGTAAT-TCGTGTGAct	x|||||||x||x||x||x:|xx	tCAGTGCACTACAGAACTTTgt	ST6GAL1
bta-miR-148a	ENSBTAT00000066562	ENSBTAG00000018829	17	39	-13.59	tGTCACGTCTTTATGTTCAAAgt	x|||||||xx|xx|x||x|||xx	tCAGTGCACTAC-AGAACTTTgt	SPRYD7
bta-miR-148a	ENSBTAT00000066602	ENSBTAG00000009476	564	585	-18.09	gGTCACGTGAGATTATtccgtt	x|||||||||xx|:x|xxxxxx	tCAGTGCACTACAGAActttgt	VEGFD
bta-miR-148a	ENSBTAT00000066619	ENSBTAG00000020387	2203	2224	-12.05	tGTCACGTtctaccctttcccc	x|||||||xxxxxxxxxxxxxx	tCAGTGCActacagaactttgt	MARF1
bta-miR-148a	ENSBTAT00000066809	ENSBTAG00000018705	1365	1386	-13.89	gGTCACGTacctacacttttgg	x|||||||xxxxxxxxxxxxxx	tCAGTGCActacagaactttgt	ADCY3
bta-miR-148a	ENSBTAT00000066865	ENSBTAG00000039819	2080	2101	-16.44	cGTCACGTGTAACCTTccgggg	x||||||||xxxx|||xxxxxx	tCAGTGCACTACAGAActttgt	RPH3AL
bta-miR-148a	ENSBTAT00000066874	ENSBTAG00000010826	1425	1446	-15.22	aGTCACGTAGACACTTacggac	x|||||||x:xxx|||xxxxxx	tCAGTGCACTACAGAActttgt	EMSY
bta-miR-148a	ENSBTAT00000066920	ENSBTAG00000053296	1816	1837	-17.01	cGTCACGTGGCGTgacgtctgg	x||||||||:x||xxxxxxxxx	tCAGTGCACTACAgaactttgt	EGLN1
bta-miR-148a	ENSBTAT00000066929	ENSBTAG00000001252	377	398	-12.2	tGTCACGTTGTATATTAAAtta	x|||||||x:|x|x||x||xxx	tCAGTGCACTACAGAACTTtgt	HIVEP1
bta-miR-148a	ENSBTAT00000066938	ENSBTAG00000009328	776	799	-20.91	gGTCACGTGTCGTTAATAGAActa	x||||||||xx||:xx|x|||xxx	tCAGTGCACTACAG--AACTTtgt	NWD1
bta-miR-148a	ENSBTAT00000066944	ENSBTAG00000022890	1259	1279	-17.54	tGTCACGT-ATGAAAGGAActc	x|||||||x|||xxxx|||xxx	tCAGTGCACTACAGAACTTtgt	MBP
bta-miR-148a	ENSBTAT00000066975	ENSBTAG00000036061	106	126	-22.69	gGTCACGTGG-GTCCCGGActg	x||||||||:x|||xx|:|xxx	tCAGTGCACTACAGAACTTtgt	-
bta-miR-148a	ENSBTAT00000066980	ENSBTAG00000006742	969	989	-13.94	tGTCACGTC-TGTACAGAtggt	x|||||||xx|||xxx||xxxx	tCAGTGCACTACAGAACTttgt	PAX1
bta-miR-148a	ENSBTAT00000067025	ENSBTAG00000021373	132	153	-22.2	cGTCACGTGG-GTCGACGAGAgg	x||||||||:x|||xxx||:|xx	tCAGTGCACTACAGAA-CTTTgt	GTF3C5
bta-miR-148a	ENSBTAT00000067035	ENSBTAG00000049341	2093	2114	-12.05	tGTCACGTTAaactagctaagg	x|||||||x|xxxxxxxxxxxx	tCAGTGCACTacagaactttgt	SERTAD2
bta-miR-148a	ENSBTAT00000067041	ENSBTAG00000049163	722	743	-16.73	aGTCACGTaggaccggcgtcgg	x|||||||xxxxxxxxxxxxxx	tCAGTGCActacagaactttgt	TSPAN9
bta-miR-148a	ENSBTAT00000067104	ENSBTAG00000051079	11	31	-13.64	tGTCACGT-ATGACcgccgagt	x|||||||x|||x|xxxxxxxx	tCAGTGCACTACAGaactttgt	TMSB4
bta-miR-148a	ENSBTAT00000067106	ENSBTAG00000020826	194	215	-17.5	tGTCACGTTTTATGTTCGGAgt	x|||||||xx|x|x||x::|xx	tCAGTGCACTACAGAACTTTgt	CHIC1
bta-miR-148a	ENSBTAT00000067110	ENSBTAG00000012253	1470	1491	-16.82	cGTCACGTCGTCTCcacggacg	x|||||||x:|x||xxxxxxxx	tCAGTGCACTACAGaactttgt	AGO1
bta-miR-148a	ENSBTAT00000067227	ENSBTAG00000006784	1400	1418	-16.85	tGTCACGTG---TCTGGGGtgt	x||||||||xxx|||x|::xxx	tCAGTGCACTACAGAACTTtgt	PLA2G4B
bta-miR-148a	ENSBTAT00000067230	ENSBTAG00000006078	643	664	-13.56	aGTCACGTTAgaaaaaaaaaaa	x|||||||x|xxxxxxxxxxxx	tCAGTGCACTacagaactttgt	-
bta-miR-148a	ENSBTAT00000067317	ENSBTAG00000010626	463	484	-15.36	cGTCACGTAGGGTCcccctgcc	x|||||||x:x|||xxxxxxxx	tCAGTGCACTACAGaactttgt	SH3GLB2
bta-miR-148a	ENSBTAT00000067397	ENSBTAG00000021130	168	190	-20.23	aGTCACGTCGACCTTGTCGAcag	x|||||||x||xx|:x|x:|xxx	tCAGTGCA-CTACAGAACTTtgt	MFSD10
bta-miR-148a	ENSBTAT00000067417	ENSBTAG00000013774	876	897	-12.02	tGTCACGTcccttcaccaccct	x|||||||xxxxxxxxxxxxxx	tCAGTGCActacagaactttgt	CCDC9B
bta-miR-148a	ENSBTAT00000067483	ENSBTAG00000020860	179	200	-13.8	tGTCACGTCGTATTAGGAAttt	x|||||||x:|x|:xx|||xxx	tCAGTGCACTACAGAACTTtgt	CHD1
bta-miR-148a	ENSBTAT00000067516	ENSBTAG00000049163	722	743	-16.73	aGTCACGTaggaccggcgtcgg	x|||||||xxxxxxxxxxxxxx	tCAGTGCActacagaactttgt	TSPAN9
bta-miR-148a	ENSBTAT00000067592	ENSBTAG00000000140	777	798	-14.93	gGTCACGTaccccgaggtagac	x|||||||xxxxxxxxxxxxxx	tCAGTGCActacagaactttgt	EPHX1
bta-miR-148a	ENSBTAT00000067671	ENSBTAG00000005034	94	115	-13.56	aGTCACGTttccacccttttcc	x|||||||xxxxxxxxxxxxxx	tCAGTGCActacagaactttgt	CAPN5
bta-miR-148a	ENSBTAT00000067672	ENSBTAG00000002980	899	918	-14.13	tGTCACGTCC-GT-TCGAAGga	x|||||||xxx||x|x|||:xx	tCAGTGCACTACAGAACTTTgt	GPT2
bta-miR-148a	ENSBTAT00000067675	ENSBTAG00000018837	870	891	-13.42	gGTCACGTctaaggatcagaac	x|||||||xxxxxxxxxxxxxx	tCAGTGCActacagaactttgt	SLC39A11
bta-miR-148a	ENSBTAT00000067697	ENSBTAG00000054523	3402	3423	-17.23	gGTCACGTTCTGTTAACAAtta	x|||||||xx|||:xxx||xxx	tCAGTGCACTACAGAACTTtgt	CNR1
bta-miR-148a	ENSBTAT00000067707	ENSBTAG00000011910	89	111	-15.86	aGTCACGTCGATTTTCCGAtttt	x|||||||x|||x|:xx||xxxx	tCAGTGCA-CTACAGAACTttgt	STK33
bta-miR-148a	ENSBTAT00000067785	ENSBTAG00000002559	121	142	-13.46	cGTCACGTccacccggacaccc	x|||||||xxxxxxxxxxxxxx	tCAGTGCActacagaactttgt	MIOX
bta-miR-148a	ENSBTAT00000067843	ENSBTAG00000052255	2396	2417	-16.13	gGTCACGTaccccggggagagt	x|||||||xxxxxxxxxxxxxx	tCAGTGCActacagaactttgt	TVP23A
bta-miR-148a	ENSBTAT00000067859	ENSBTAG00000021964	81	101	-13.89	gGTCACGT-ATacaacctactt	x|||||||x||xxxxxxxxxxx	tCAGTGCACTAcagaactttgt	CDH17
bta-miR-148a	ENSBTAT00000067863	ENSBTAG00000001597	1256	1279	-20.99	gGTCACGTGTCCTGTCgcaccagg	x||||||||xxx||||xxxxxxxx	tCAGTGCACT--ACAGaactttgt	PITPNM2
bta-miR-148a	ENSBTAT00000067867	ENSBTAG00000000933	198	218	-13.53	aGTCACGTC-TCTCTccgccct	x|||||||xx|x|||xxxxxxx	tCAGTGCACTACAGAactttgt	CCDC183
bta-miR-148a	ENSBTAT00000067900	ENSBTAG00000010937	598	619	-13.29	gGTCACGTCAGGACaccatgaa	x|||||||x|x|x|xxxxxxxx	tCAGTGCACTACAGaactttgt	APOO
bta-miR-148a	ENSBTAT00000067939	ENSBTAG00000005442	874	894	-15.41	gGTCACGTCG-GTTTaatttta	x|||||||x:x||:|xxxxxxx	tCAGTGCACTACAGAactttgt	DNAI4
bta-miR-148a	ENSBTAT00000068021	ENSBTAG00000021318	1011	1031	-15.66	cGTCACGTTA-GACGGGGAcat	x|||||||x|x|x|xx|:|xxx	tCAGTGCACTACAGAACTTtgt	SCAMP5
bta-miR-148a	ENSBTAT00000068043	ENSBTAG00000018225	516	537	-17.03	gGTCACGTGGCTCCTacccctc	x||||||||:xxx||xxxxxxx	tCAGTGCACTACAGAactttgt	SIPA1L3
bta-miR-148a	ENSBTAT00000068058	ENSBTAG00000046152	314	336	-18.96	gGTCACGTAGAAGTCggttatat	x|||||||x||x|||xxxxxxxx	tCAGTGCA-CTACAGaactttgt	MGAM
bta-miR-148a	ENSBTAT00000068087	ENSBTAG00000005963	1598	1619	-15.24	aGTCACGTccgacagacgacgg	x|||||||xxxxxxxxxxxxxx	tCAGTGCActacagaactttgt	MAT1A
bta-miR-148a	ENSBTAT00000068203	ENSBTAG00000051575	277	298	-13.27	tGTCACGTctccagcccccgca	x|||||||xxxxxxxxxxxxxx	tCAGTGCActacagaactttgt	FOXE3
bta-miR-148a	ENSBTAT00000068211	ENSBTAG00000007308	458	478	-15.64	cGTCACGTCG-GTCAAGAtgta	x|||||||x:x|||xx||xxxx	tCAGTGCACTACAGAACTttgt	EDC3
bta-miR-148a	ENSBTAT00000068244	ENSBTAG00000012678	1100	1119	-20.08	gGTCACGTC--GTCTCGGAcag	x|||||||xxx||||x|:|xxx	tCAGTGCACTACAGAACTTtgt	COLGALT1
bta-miR-148a	ENSBTAT00000068340	ENSBTAG00000003414	498	520	-14.24	cGTCACGTCGTAGAATTGtcggt	x|||||||x:|x|xx|||xxxxx	tCAGTGCACTA-CAGAACtttgt	SAXO2
bta-miR-148a	ENSBTAT00000068357	ENSBTAG00000018837	870	891	-13.42	gGTCACGTctaaggatcagaac	x|||||||xxxxxxxxxxxxxx	tCAGTGCActacagaactttgt	SLC39A11
bta-miR-148a	ENSBTAT00000068404	ENSBTAG00000026963	2342	2366	-19.75	tGTCACGTGACCTAGTCTgtatgtt	x|||||||||xx|x||||xxxxxxx	tCAGTGCACT--A-CAGAactttgt	NCALD
bta-miR-148a	ENSBTAT00000068456	ENSBTAG00000011975	198	221	-14.23	aGTCACGTAAGTTCTCTTTAGtgc	x|||||||x|xx|x||||x|:xxx	tCAGTGCACT--ACAGAACTTtgt	SERPINB1
bta-miR-148a	ENSBTAT00000068471	ENSBTAG00000020281	638	660	-12.02	tGTCACGTCAACTCATTTActca	x|||||||x|xx||x||x|xxxx	tCAGTGCACTACAG-AACTttgt	NIN
bta-miR-148a	ENSBTAT00000068518	ENSBTAG00000020657	138	160	-18.04	aGTCACGTCGGTacgggcccccg	x|||||||x|:|xxxxxxxxxxx	tCAGTGCA-CTAcagaactttgt	FAT1
bta-miR-148a	ENSBTAT00000068538	ENSBTAG00000025612	2166	2186	-15.19	gGTCACGTTC-GTCCTttcctt	x|||||||xxx|||x|xxxxxx	tCAGTGCACTACAGAActttgt	URM1
bta-miR-148a	ENSBTAT00000068604	ENSBTAG00000051021	27	51	-20.23	tGTCACGTACAGATGTCGTAAttac	x|||||||xxx||||||x|x|xxxx	tCAGTGCA---CTACAGAACTttgt	FASTKD5
bta-miR-148a	ENSBTAT00000068669	ENSBTAG00000015449	209	232	-15.96	aGTCACGTCATAGACGTTGtcacg	x|||||||x||x|x|x|||xxxxx	tCAGTGCACTA-CAG-AACtttgt	PPEF2
bta-miR-148a	ENSBTAT00000068700	ENSBTAG00000054572	195	216	-15.94	cGTCACGTCCGGTCgagccacc	x|||||||xxx|||xxxxxxxx	tCAGTGCACTACAGaactttgt	PEG3
bta-miR-148a	ENSBTAT00000068703	ENSBTAG00000039686	212	233	-20.02	aGTCACGTGACGTgcgtacagg	x|||||||||x||xxxxxxxxx	tCAGTGCACTACAgaactttgt	ACOT11
bta-miR-148a	ENSBTAT00000068751	ENSBTAG00000002844	184	205	-15.97	gGTCACGTacaccaaaccaggt	x|||||||xxxxxxxxxxxxxx	tCAGTGCActacagaactttgt	PPFIA3
bta-miR-148a	ENSBTAT00000068773	ENSBTAG00000001694	655	676	-19.56	aGTCACGTGACGgaaattttcg	x|||||||||x|xxxxxxxxxx	tCAGTGCACTACagaactttgt	TYRO3
bta-miR-148a	ENSBTAT00000068790	ENSBTAG00000020281	638	660	-12.02	tGTCACGTCAACTCATTTActca	x|||||||x|xx||x||x|xxxx	tCAGTGCACTACAG-AACTttgt	NIN
bta-miR-148a	ENSBTAT00000068791	ENSBTAG00000053581	1224	1241	-21.66	tGTCACGTGA---CT-GAAAca	x|||||||||xxx||x||||xx	tCAGTGCACTACAGAACTTTgt	SUCNR1
bta-miR-148a	ENSBTAT00000068812	ENSBTAG00000020037	1641	1660	-18.38	cGTCACGTCCT--TTTGAGAta	x|||||||xx|xx:||||:|xx	tCAGTGCACTACAGAACTTTgt	CYB5RL
bta-miR-148a	ENSBTAT00000068815	ENSBTAG00000019589	9	30	-16.57	aGTCACGTcccagggcgactga	x|||||||xxxxxxxxxxxxxx	tCAGTGCActacagaactttgt	CFAP410
bta-miR-148a	ENSBTAT00000068819	ENSBTAG00000021999	1636	1657	-14.26	tGTCACGTactaaacccccggg	x|||||||xxxxxxxxxxxxxx	tCAGTGCActacagaactttgt	CPT1A
bta-miR-148a	ENSBTAT00000068857	ENSBTAG00000011509	202	223	-14.26	tGTCACGTCAGATCggagggaa	x|||||||x|xx||xxxxxxxx	tCAGTGCACTACAGaactttgt	SERAC1
bta-miR-148a	ENSBTAT00000068879	ENSBTAG00000054666	411	433	-19.58	gGTCACGTGGCGATCgctgcatc	x||||||||:x|x||xxxxxxxx	tCAGTGCACTAC-AGaactttgt	-
bta-miR-148a	ENSBTAT00000068919	ENSBTAG00000020761	509	528	-11.61	cGTCACGT--TTTCTTCActgt	x|||||||xx|x||||x|xxxx	tCAGTGCACTACAGAACTttgt	USP33
bta-miR-148a	ENSBTAT00000068937	ENSBTAG00000003600	718	741	-19.3	aGTCACGTGCTCTCAGTCGAGGta	x||||||||x|x||xx|x||::xx	tCAGTGCACTACAG--AACTTTgt	CAPN8
bta-miR-148a	ENSBTAT00000068950	ENSBTAG00000003825	1068	1089	-11.41	cGTCACGTcctacccttctttg	x|||||||xxxxxxxxxxxxxx	tCAGTGCActacagaactttgt	PTPN12
bta-miR-148a	ENSBTAT00000068989	ENSBTAG00000015980	214	235	-19.53	gGTCACGTCGTCTCGGGCAcgc	x|||||||x:|x||xx|x|xxx	tCAGTGCACTACAGAACTTtgt	FASN
bta-miR-148a	ENSBTAT00000068999	ENSBTAG00000021923	800	820	-12.72	tGTCACGT-ATACCAAGTGAca	x|||||||x||xx|xx|x:|xx	tCAGTGCACTACAGAACTTTgt	DSG2
bta-miR-148a	ENSBTAT00000069104	ENSBTAG00000001632	257	278	-22.3	aGTCACGTGATTTTGTctcttt	x||||||||||x|:x|xxxxxx	tCAGTGCACTACAGAActttgt	NBR1
bta-miR-148a	ENSBTAT00000069127	ENSBTAG00000000379	463	485	-12.81	tGTCACGTTGACCTTTATAAAaa	x|||||||x||xx|:|xx|||xx	tCAGTGCA-CTACAGAACTTTgt	GOLT1B
bta-miR-148a	ENSBTAT00000069134	ENSBTAG00000008438	297	318	-13.56	aGTCACGTTTAGACATAAtcca	x|||||||xxx|x|x|x|xxxx	tCAGTGCACTACAGAACTttgt	ARFIP1
bta-miR-148a	ENSBTAT00000069161	ENSBTAG00000007704	708	730	-15.57	aGTCACGTTTTCTCATTGtcatt	x|||||||xx|x||x|||xxxxx	tCAGTGCACTACAG-AACtttgt	ELOVL7
bta-miR-148a	ENSBTAT00000069163	ENSBTAG00000050467	917	938	-17.84	gGTCACGTGGACCGTTTAAttt	x||||||||:xxxx||x||xxx	tCAGTGCACTACAGAACTTtgt	BBS10
bta-miR-148a	ENSBTAT00000069182	ENSBTAG00000008313	350	370	-14.39	tGTCACGTCG-GACCTGAAGac	x|||||||x:x|x|x||||:xx	tCAGTGCACTACAGAACTTTgt	KLF15
bta-miR-148a	ENSBTAT00000069186	ENSBTAG00000044048	124	145	-13.85	cGTCACGTcttccgagtcgagg	x|||||||xxxxxxxxxxxxxx	tCAGTGCActacagaactttgt	LMBR1L
bta-miR-148a	ENSBTAT00000069222	ENSBTAG00000054175	182	203	-21.13	gGTCACGTGGTcggggttcgta	x||||||||:|xxxxxxxxxxx	tCAGTGCACTAcagaactttgt	-
bta-miR-148a	ENSBTAT00000069303	ENSBTAG00000005615	7	30	-15.52	tGTCACGTTGTTCGTCCTGtccaa	x|||||||x:|xx|||x||xxxxx	tCAGTGCACTA--CAGAACtttgt	CEACAM1
bta-miR-148a	ENSBTAT00000069307	ENSBTAG00000017469	575	596	-14.16	cGTCACGTAGTTTTATTAGccg	x|||||||x:|x|:x|x|:xxx	tCAGTGCACTACAGAACTTtgt	CCDC88A
bta-miR-148a	ENSBTAT00000069310	ENSBTAG00000023795	185	208	-14.56	gGTCACGTCGACTGACgacccccg	x|||||||x||x||x|xxxxxxxx	tCAGTGCA-CT-ACAGaactttgt	VAC14
bta-miR-148a	ENSBTAT00000069322	ENSBTAG00000000329	533	559	-18.91	aGTCACGTCATGAACTGTCTTACAAag	x|||||||xxx||xx||||||xx||xx	tCAGTGCA---CT--ACAGAACTTTgt	MEGF10
bta-miR-148a	ENSBTAT00000069341	ENSBTAG00000030297	1769	1790	-14.23	aGTCACGTAATagagtatcagt	x|||||||x||xxxxxxxxxxx	tCAGTGCACTAcagaactttgt	-
bta-miR-148a	ENSBTAT00000069342	ENSBTAG00000021253	678	699	-14.86	tGTCACGTttgctgcagcgcac	x|||||||xxxxxxxxxxxxxx	tCAGTGCActacagaactttgt	PRDM15
bta-miR-148a	ENSBTAT00000069345	ENSBTAG00000002982	1068	1089	-16.55	aGTCACGTTTCGTTGTAGAGgt	x|||||||xxx||:x|x:|:xx	tCAGTGCACTACAGAACTTTgt	PITPNM3
bta-miR-148a	ENSBTAT00000069368	ENSBTAG00000000011	1769	1790	-19.98	aGTCACGTGATccccagtcccc	x||||||||||xxxxxxxxxxx	tCAGTGCACTAcagaactttgt	TDH
bta-miR-148a	ENSBTAT00000069472	ENSBTAG00000010018	25	46	-16.65	aGTCACGTCCTGTTGTagtaga	x|||||||xx|||:x|xxxxxx	tCAGTGCACTACAGAActttgt	ATP7A
bta-miR-148a	ENSBTAT00000069500	ENSBTAG00000039793	1204	1225	-23.26	gGTCACGTGGAGTCTTTAcccc	x||||||||:x|||||x|xxxx	tCAGTGCACTACAGAACTttgt	HDGF
bta-miR-148a	ENSBTAT00000069505	ENSBTAG00000007096	789	809	-15.99	cGTCACGTT-TGTCcgtacatt	x|||||||xx||||xxxxxxxx	tCAGTGCACTACAGaactttgt	GAS8
bta-miR-148a	ENSBTAT00000069518	ENSBTAG00000008218	344	365	-19.32	cGTCACGTAAAATCTCGAAAcg	x|||||||x|xx|||x||||xx	tCAGTGCACTACAGAACTTTgt	NPTN
bta-miR-148a	ENSBTAT00000069519	ENSBTAG00000055296	380	401	-13.53	aGTCACGTCTTTACTcaactaa	x|||||||xx|xx||xxxxxxx	tCAGTGCACTACAGAactttgt	LGALSL
bta-miR-148a	ENSBTAT00000069526	ENSBTAG00000021504	587	607	-13.89	gGTCACGT-ACATTTTCAAtac	x|||||||x|xx|:||x||xxx	tCAGTGCACTACAGAACTTtgt	TIRAP
bta-miR-148a	ENSBTAT00000069581	ENSBTAG00000010756	600	620	-17.62	tGTCACGTT-TGTCGTGCAcgt	x|||||||xx||||x||x|xxx	tCAGTGCACTACAGAACTTtgt	ST7
bta-miR-148a	ENSBTAT00000069604	ENSBTAG00000043989	3382	3402	-17.63	aGTCACGTAATC-CTTGAtcgg	x|||||||x||xx|||||xxxx	tCAGTGCACTACAGAACTttgt	EYA3
bta-miR-148a	ENSBTAT00000069614	ENSBTAG00000039195	170	192	-17.99	tGTCACGTCGATGACTTtttgta	x|||||||x||||x|||xxxxxx	tCAGTGCA-CTACAGAActttgt	NHS
bta-miR-148a	ENSBTAT00000069627	ENSBTAG00000001632	257	278	-22.3	aGTCACGTGATTTTGTctcttt	x||||||||||x|:x|xxxxxx	tCAGTGCACTACAGAActttgt	NBR1
bta-miR-148a	ENSBTAT00000069643	ENSBTAG00000004078	35	53	-24.09	cGTCACGTGA---CTTGGGAcc	x|||||||||xxx||||::|xx	tCAGTGCACTACAGAACTTTgt	KCNH2
bta-miR-148a	ENSBTAT00000069660	ENSBTAG00000009806	109	131	-18.98	aGTCACGTCGACTTCTTAAAtgt	x|||||||x||xx||||x||xxx	tCAGTGCA-CTACAGAACTTtgt	INVS
bta-miR-148a	ENSBTAT00000069678	ENSBTAG00000052050	182	203	-21.13	gGTCACGTGGTcggggttcgta	x||||||||:|xxxxxxxxxxx	tCAGTGCACTAcagaactttgt	-
bta-miR-148a	ENSBTAT00000069694	ENSBTAG00000009643	221	242	-16.91	tGTCACGTGAaaatacaataaa	x|||||||||xxxxxxxxxxxx	tCAGTGCACTacagaactttgt	ZBTB25
bta-miR-148a	ENSBTAT00000069705	ENSBTAG00000020799	902	923	-12.07	cGTCACGTccggaaagagttct	x|||||||xxxxxxxxxxxxxx	tCAGTGCActacagaactttgt	EXOC6B
bta-miR-148a	ENSBTAT00000069756	ENSBTAG00000009655	558	581	-24.41	gGTCACGTGGTAAGTCTGGAccat	x||||||||:|xx||||x||xxxx	tCAGTGCACTA--CAGAACTttgt	TNS3
bta-miR-148a	ENSBTAT00000069780	ENSBTAG00000021097	1041	1062	-12.36	cGTCACGTCCCGTgcgtcaccc	x|||||||xxx||xxxxxxxxx	tCAGTGCACTACAgaactttgt	PELI3
bta-miR-148a	ENSBTAT00000069814	ENSBTAG00000025250	277	296	-12.05	tGTCACGT--TCACTTccaccc	x|||||||xx|xx|||xxxxxx	tCAGTGCACTACAGAActttgt	CCL3
bta-miR-148a	ENSBTAT00000069870	ENSBTAG00000021999	1636	1657	-14.26	tGTCACGTactaaacccccggg	x|||||||xxxxxxxxxxxxxx	tCAGTGCActacagaactttgt	CPT1A
bta-miR-148a	ENSBTAT00000069872	ENSBTAG00000005152	808	828	-14.8	gGTCACGT-ATcgagaggattc	x|||||||x||xxxxxxxxxxx	tCAGTGCACTAcagaactttgt	-
bta-miR-148a	ENSBTAT00000069905	ENSBTAG00000010837	412	433	-14.14	cGTCACGTacactcgtccgtgt	x|||||||xxxxxxxxxxxxxx	tCAGTGCActacagaactttgt	HTR4
bta-miR-148a	ENSBTAT00000069912	ENSBTAG00000018216	789	810	-13.24	cGTCACGTcggaacgaataaaa	x|||||||xxxxxxxxxxxxxx	tCAGTGCActacagaactttgt	SKA1
bta-miR-148a	ENSBTAT00000069923	ENSBTAG00000001356	208	228	-15.22	gGTCACGTAAAACCT-GAGAga	x|||||||x|xxx||x||:|xx	tCAGTGCACTACAGAACTTTgt	USP38
bta-miR-148a	ENSBTAT00000070037	ENSBTAG00000014825	848	869	-13.19	gGTCACGTCCTTTTCAGAGtgt	x|||||||xx|x|:xx||:xxx	tCAGTGCACTACAGAACTTtgt	NLK
bta-miR-148a	ENSBTAT00000070054	ENSBTAG00000021491	369	390	-11.41	cGTCACGTCATcaatcaatgtt	x|||||||x||xxxxxxxxxxx	tCAGTGCACTAcagaactttgt	NDUFV3
bta-miR-148a	ENSBTAT00000070105	ENSBTAG00000002691	66	89	-19.4	aGTCACGTACTCGGTCCTGGAttc	x|||||||xx|xx|||x||:|xxx	tCAGTGCACTA--CAGAACTTtgt	ELMOD1
bta-miR-148a	ENSBTAT00000070179	ENSBTAG00000000094	284	304	-12.72	tGTCACGT-ATATTaattcagt	x|||||||x||x|:xxxxxxxx	tCAGTGCACTACAGaactttgt	ATPAF1
bta-miR-148a	ENSBTAT00000070272	ENSBTAG00000017037	181	203	-20.44	gGTCACGTAGAGGGGTAGTGAgg	x|||||||x||x|xx|x|x:|xx	tCAGTGCA-CTACAGAACTTTgt	PKN1
bta-miR-148a	ENSBTAT00000070279	ENSBTAG00000024426	421	442	-13.85	tGTCACGTTAcaaaaggaatat	x|||||||x|xxxxxxxxxxxx	tCAGTGCACTacagaactttgt	PPP1R9A
bta-miR-148a	ENSBTAT00000070309	ENSBTAG00000020657	138	160	-18.04	aGTCACGTCGGTacgggcccccg	x|||||||x|:|xxxxxxxxxxx	tCAGTGCA-CTAcagaactttgt	FAT1
bta-miR-148a	ENSBTAT00000070334	ENSBTAG00000053346	500	521	-14.04	gGTCACGTctcccggacccaag	x|||||||xxxxxxxxxxxxxx	tCAGTGCActacagaactttgt	SPSB2
bta-miR-148a	ENSBTAT00000070343	ENSBTAG00000010626	463	484	-15.36	cGTCACGTAGGGTCcccctgcc	x|||||||x:x|||xxxxxxxx	tCAGTGCACTACAGaactttgt	SH3GLB2
bta-miR-148a	ENSBTAT00000070346	ENSBTAG00000030566	209	229	-19.28	aGTCACGTCG-GTTTTGtttat	x|||||||x:x||:|||xxxxx	tCAGTGCACTACAGAACtttgt	GLE1
bta-miR-148a	ENSBTAT00000070371	ENSBTAG00000021143	5000	5021	-13.35	tGTCACGTtctccccgactgga	x|||||||xxxxxxxxxxxxxx	tCAGTGCActacagaactttgt	DNMT3A
bta-miR-148a	ENSBTAT00000070384	ENSBTAG00000002098	1365	1386	-15.05	tGTCACGTCCCGTgggtcccca	x|||||||xxx||xxxxxxxxx	tCAGTGCACTACAgaactttgt	CDC34
bta-miR-148a	ENSBTAT00000070386	ENSBTAG00000009904	524	546	-14.59	tGTCACGTCGGTTTTTTttttaa	x|||||||x|:|x|:||xxxxxx	tCAGTGCA-CTACAGAActttgt	SPIC
bta-miR-148a	ENSBTAT00000070402	ENSBTAG00000010278	208	229	-13.53	aGTCACGTcccagccccgcccc	x|||||||xxxxxxxxxxxxxx	tCAGTGCActacagaactttgt	STPG1
bta-miR-148a	ENSBTAT00000070451	ENSBTAG00000003044	1905	1925	-17.06	cGTCACGTG-TGACCTGtggag	x||||||||x||x|x||xxxxx	tCAGTGCACTACAGAACtttgt	SPIN1
bta-miR-148a	ENSBTAT00000070483	ENSBTAG00000053740	692	713	-13.56	aGTCACGTTATcatccttttcg	x|||||||x||xxxxxxxxxxx	tCAGTGCACTAcagaactttgt	-
bta-miR-148a	ENSBTAT00000070563	ENSBTAG00000040555	161	182	-13.53	aGTCACGTcccccatctctcac	x|||||||xxxxxxxxxxxxxx	tCAGTGCActacagaactttgt	FBXL19
bta-miR-148a	ENSBTAT00000070590	ENSBTAG00000046129	324	345	-15.07	aGTCACGTttacaggtccctaa	x|||||||xxxxxxxxxxxxxx	tCAGTGCActacagaactttgt	RAB34
bta-miR-148a	ENSBTAT00000070650	ENSBTAG00000002727	523	544	-12.83	tGTCACGTcccgaaaatcgact	x|||||||xxxxxxxxxxxxxx	tCAGTGCActacagaactttgt	PHACTR4
bta-miR-148a	ENSBTAT00000070666	ENSBTAG00000000902	1241	1262	-13.75	cGTCACGTCAaacgatgatgac	x|||||||x|xxxxxxxxxxxx	tCAGTGCACTacagaactttgt	OGT
bta-miR-148a	ENSBTAT00000070671	ENSBTAG00000007031	406	427	-16.41	aGTCACGTGCTtacaccgacct	x||||||||x|xxxxxxxxxxx	tCAGTGCACTAcagaactttgt	OXSM
bta-miR-148a	ENSBTAT00000070672	ENSBTAG00000054229	568	589	-16.55	cGTCACGTTGTGTTccatggtt	x|||||||x:|||:xxxxxxxx	tCAGTGCACTACAGaactttgt	C2CD3
bta-miR-148a	ENSBTAT00000070677	ENSBTAG00000002345	964	985	-16.56	gGTCACGTACTGTAGTCACAaa	x|||||||xx|||xx|x|x|xx	tCAGTGCACTACAGAACTTTgt	SETD1A
bta-miR-148a	ENSBTAT00000070733	ENSBTAG00000046092	97	119	-16.43	gGTCACGTCTTAAGGTTGAtgtt	x|||||||xx|xxxx||||xxxx	tCAGTGCACTACAG-AACTttgt	HDAC8
bta-miR-148a	ENSBTAT00000070781	ENSBTAG00000021504	587	607	-13.89	gGTCACGT-ACATTTTCAAtac	x|||||||x|xx|:||x||xxx	tCAGTGCACTACAGAACTTtgt	TIRAP
bta-miR-148a	ENSBTAT00000070817	ENSBTAG00000015796	1455	1478	-15.08	gGTCACGTAAATAGAGTGGAGAgt	x|||||||x|x|x|xx|x||:|xx	tCAGTGCACT-A-CAGAACTTTgt	DNAJC5
bta-miR-148a	ENSBTAT00000070874	ENSBTAG00000001657	1150	1171	-12.02	tGTCACGTCAAATTAAGAAGta	x|||||||x|xx|:xx|||:xx	tCAGTGCACTACAGAACTTTgt	PICALM
bta-miR-148a	ENSBTAT00000070875	ENSBTAG00000052670	449	470	-20.69	gGTCACGTGAGGagcaccggtc	x|||||||||x|xxxxxxxxxx	tCAGTGCACTACagaactttgt	CD99L2
bta-miR-148a	ENSBTAT00000070883	ENSBTAG00000001523	626	644	-13.44	tGTCACGTAATAT---GAAAgt	x|||||||x||x|xxx||||xx	tCAGTGCACTACAGAACTTTgt	YES1
bta-miR-148a	ENSBTAT00000070928	ENSBTAG00000053740	692	713	-13.56	aGTCACGTTATcatccttttcg	x|||||||x||xxxxxxxxxxx	tCAGTGCACTAcagaactttgt	-
bta-miR-148a	ENSBTAT00000070944	ENSBTAG00000001252	377	398	-12.2	tGTCACGTTGTATATTAAAtta	x|||||||x:|x|x||x||xxx	tCAGTGCACTACAGAACTTtgt	HIVEP1
bta-miR-148a	ENSBTAT00000070955	ENSBTAG00000016414	1	22	-15.86	gGTCACGTCCGGCGGTCTcagt---	x|||||||xxx|xx||||xxxxxxx	tCAGTGCA---CTACAGAactttgt	VDR
bta-miR-148a	ENSBTAT00000070983	ENSBTAG00000043981	822	843	-14.12	aGTCACGTtcaccgacaaaaca	x|||||||xxxxxxxxxxxxxx	tCAGTGCActacagaactttgt	SBF2
bta-miR-148a	ENSBTAT00000071156	ENSBTAG00000011189	15	36	-15.87	gGTCACGTCGTcgccgccttcc	x|||||||x:|xxxxxxxxxxx	tCAGTGCACTAcagaactttgt	TJAP1
bta-miR-148a	ENSBTAT00000071228	ENSBTAG00000049163	722	743	-16.73	aGTCACGTaggaccggcgtcgg	x|||||||xxxxxxxxxxxxxx	tCAGTGCActacagaactttgt	TSPAN9
bta-miR-148a	ENSBTAT00000071236	ENSBTAG00000024015	158	175	-14.4	cGTCACGT----TCGTCAAAat	x|||||||xxxx||x|x|||xx	tCAGTGCACTACAGAACTTTgt	PTPRM
bta-miR-148a	ENSBTAT00000071240	ENSBTAG00000005039	960	981	-18.15	gGTCACGTGGaacaaggggtcg	x||||||||:xxxxxxxxxxxx	tCAGTGCACTacagaactttgt	ARAF
bta-miR-148a	ENSBTAT00000071259	ENSBTAG00000008184	174	199	-13.25	cGTCACGTTAAAAATTTTATGACAtt	x|||||||x|xxxx|x|:x|||x|xx	tCAGTGCACT----ACAGAACTTTgt	CCT6A
bta-miR-148a	ENSBTAT00000071347	ENSBTAG00000017797	10	34	-17.76	aGTCACGTTTAATCGTTTGGAGAtc	x|||||||xxx||x||:|x||:|xx	tCAGTGCAC--TA-CAGAACTTTgt	LY75
bta-miR-148a	ENSBTAT00000071361	ENSBTAG00000007444	33	54	-21.64	gGTCACGTGTCGTCagtggttg	x||||||||xx|||xxxxxxxx	tCAGTGCACTACAGaactttgt	MAP3K7CL
bta-miR-148a	ENSBTAT00000071366	ENSBTAG00000000088	250	276	-18.16	aGTCACGTCTGTAAATGTCTTttttta	x|||||||xx|xxx|||||||xxxxxx	tCAGTGCA--C---TACAGAActttgt	ALCAM
bta-miR-148a	ENSBTAT00000071430	ENSBTAG00000046869	309	331	-17.24	aGTCACGTCGACCCTGCGAGAag	x|||||||x:xxx||xx||:|xx	tCAGTGCACTACAGAA-CTTTgt	RNH1
bta-miR-148a	ENSBTAT00000071446	ENSBTAG00000052516	2905	2925	-15.11	tGTCACGTG-TCACTTacacca	x||||||||x|xx|||xxxxxx	tCAGTGCACTACAGAActttgt	CDA
bta-miR-148a	ENSBTAT00000071462	ENSBTAG00000010357	723	743	-16.73	gGTCACGTAAT-TCGTGTGAct	x|||||||x||x||x||x:|xx	tCAGTGCACTACAGAACTTTgt	ST6GAL1
bta-miR-148a	ENSBTAT00000071464	ENSBTAG00000004135	1062	1084	-18.56	tGTCACGTTAATGTCTTtcgtta	x|||||||x|x||||||xxxxxx	tCAGTGCACT-ACAGAActttgt	LMTK2
bta-miR-148a	ENSBTAT00000071527	ENSBTAG00000043981	822	843	-14.12	aGTCACGTtcaccgacaaaaca	x|||||||xxxxxxxxxxxxxx	tCAGTGCActacagaactttgt	SBF2
bta-miR-148a	ENSBTAT00000071533	ENSBTAG00000013971	157	178	-16.04	gGTCACGTCTTCTCGGGCAcgg	x|||||||xx|x||xx|x|xxx	tCAGTGCACTACAGAACTTtgt	PI4KA
bta-miR-148a	ENSBTAT00000071544	ENSBTAG00000007981	2272	2293	-14.11	tGTCACGTAAccgaaactccac	x|||||||x|xxxxxxxxxxxx	tCAGTGCACTacagaactttgt	GRK5
bta-miR-148a	ENSBTAT00000071608	ENSBTAG00000000329	533	559	-18.91	aGTCACGTCATGAACTGTCTTACAAag	x|||||||xxx||xx||||||xx||xx	tCAGTGCA---CT--ACAGAACTTTgt	MEGF10
bta-miR-148a	ENSBTAT00000071629	ENSBTAG00000047707	1524	1545	-15.96	tGTCACGTCGGT-TTTTGtttgt	x|||||||x|:|x|:|||xxxxx	tCAGTGCA-CTACAGAACtttgt	BOLA-DOB
bta-miR-148a	ENSBTAT00000071692	ENSBTAG00000039319	393	416	-13.21	tGTCACGTCTTATGACCTCAccca	x|||||||xxx|||x|x|x|xxxx	tCAGTGCAC--TACAGAACTttgt	CYP4F2
bta-miR-148a	ENSBTAT00000071698	ENSBTAG00000007120	1936	1957	-13.53	aGTCACGTccgccgctacccct	x|||||||xxxxxxxxxxxxxx	tCAGTGCActacagaactttgt	ARFGEF2
bta-miR-148a	ENSBTAT00000071702	ENSBTAG00000020889	609	629	-14.52	aGTCACGT-ACCTCCCTAAcag	x|||||||x|xx||xxx||xxx	tCAGTGCACTACAGAACTTtgt	CA7
bta-miR-148a	ENSBTAT00000071739	ENSBTAG00000010681	315	336	-14.58	tGTCACGTcttaaagagacccc	x|||||||xxxxxxxxxxxxxx	tCAGTGCActacagaactttgt	NR1H3
bta-miR-148a	ENSBTAT00000071767	ENSBTAG00000020472	3786	3807	-18.23	gGTCACGTGcagcaagccagca	x||||||||xxxxxxxxxxxxx	tCAGTGCACtacagaactttgt	KDM5A
bta-miR-148a	ENSBTAT00000071803	ENSBTAG00000017339	1424	1443	-13.3	tGTCACGTTTTATGT--AAAta	x|||||||xx|x|x|xx|||xx	tCAGTGCACTACAGAACTTTgt	RUNX1T1
bta-miR-148a	ENSBTAT00000071877	ENSBTAG00000003455	19	40	-20.93	cGTCACGTGGTccgaagggaca	x||||||||:|xxxxxxxxxxx	tCAGTGCACTAcagaactttgt	ANKRD6
bta-miR-148a	ENSBTAT00000071880	ENSBTAG00000020079	383	406	-22.89	aGTCACGTGAGCCGTCTgtcctct	x|||||||||xxx||||xxxxxxx	tCAGTGCACTA--CAGAactttgt	MAP3K4
bta-miR-148a	ENSBTAT00000071904	ENSBTAG00000001252	377	398	-12.2	tGTCACGTTGTATATTAAAtta	x|||||||x:|x|x||x||xxx	tCAGTGCACTACAGAACTTtgt	HIVEP1
bta-miR-148a	ENSBTAT00000071928	ENSBTAG00000016731	233	253	-12.17	tGTCACGTC-TGCCTacctccg	x|||||||xx||x||xxxxxxx	tCAGTGCACTACAGAactttgt	TMEM42
bta-miR-148a	ENSBTAT00000071979	ENSBTAG00000009995	1187	1205	-19.01	tGTCACGTTTTGT---GAAAcg	x|||||||xx|||xxx||||xx	tCAGTGCACTACAGAACTTTgt	CPEB4
bta-miR-148a	ENSBTAT00000071981	ENSBTAG00000027074	884	905	-12.17	tGTCACGTTAcactcaagtact	x|||||||x|xxxxxxxxxxxx	tCAGTGCACTacagaactttgt	SV2B
bta-miR-148a	ENSBTAT00000072039	ENSBTAG00000016564	10	30	-19.18	aGTCACGTT-TGTGGTGTAAct	x|||||||xx|||xx||x||xx	tCAGTGCACTACAGAACTTTgt	NPRL3
bta-miR-148a	ENSBTAT00000072053	ENSBTAG00000043981	822	843	-14.12	aGTCACGTtcaccgacaaaaca	x|||||||xxxxxxxxxxxxxx	tCAGTGCActacagaactttgt	SBF2
bta-miR-148a	ENSBTAT00000072155	ENSBTAG00000012753	1101	1122	-16.19	cGTCACGTcccgggggacaggt	x|||||||xxxxxxxxxxxxxx	tCAGTGCActacagaactttgt	BRF1
bta-miR-148a	ENSBTAT00000072184	ENSBTAG00000048365	1995	2016	-15.84	tGTCACGTGcactgaaccaccg	x||||||||xxxxxxxxxxxxx	tCAGTGCACtacagaactttgt	WNT7B
bta-miR-148a	ENSBTAT00000072222	ENSBTAG00000034693	1543	1564	-11.41	cGTCACGTCATcctcccttacc	x|||||||x||xxxxxxxxxxx	tCAGTGCACTAcagaactttgt	SYT1
bta-miR-148a	ENSBTAT00000072223	ENSBTAG00000051439	967	987	-17.72	gGTCACGTG-TGACCCGAGGag	x||||||||x||x|xx||::xx	tCAGTGCACTACAGAACTTTgt	-
bta-miR-148a	ENSBTAT00000072316	ENSBTAG00000012653	670	691	-19.91	gGTCACGTGGAGggaccgggac	x||||||||:x|xxxxxxxxxx	tCAGTGCACTACagaactttgt	CAMK2B
bta-miR-148a	ENSBTAT00000072363	ENSBTAG00000018785	1280	1304	-14.87	cGTCACGTTATACAGTCTTTAtcca	x|||||||x||xxx|||||x|xxxx	tCAGTGCACTA---CAGAACTttgt	TUBB1
bta-miR-148a	ENSBTAT00000072381	ENSBTAG00000049695	455	478	-16.78	tGTCACGTCCCGTGTCccatgtgt	x|||||||xxx:||||xxxxxxxx	tCAGTGCAC--TACAGaactttgt	LMX1B
bta-miR-148a	ENSBTAT00000072494	ENSBTAG00000010380	844	865	-23.19	aGTCACGTTATGTCTgtcacgt	x|||||||x||||||xxxxxxx	tCAGTGCACTACAGAactttgt	INO80
bta-miR-148a	ENSBTAT00000072507	ENSBTAG00000003038	308	329	-14.21	tGTCACGTATTAAAATGAAAag	x|||||||xx|xxxx|||||xx	tCAGTGCACTACAGAACTTTgt	TAP2
bta-miR-148a	ENSBTAT00000072529	ENSBTAG00000004344	349	367	-17.72	gGTCACGTGC---CCTGAGAaa	x||||||||xxxx|x|||:|xx	tCAGTGCACTACAGAACTTTgt	ACSL1
bta-miR-148a	ENSBTAT00000072534	ENSBTAG00000053794	1	21	-13.53	aGTCACGTCCTCTCGTTTAGt--	x|||||||xx|x||x||x|:xxx	tCAGTGCACTACAG-AACTTtgt	-
bta-miR-148a	ENSBTAT00000072535	ENSBTAG00000052268	481	505	-12.51	cGTCACGTAAGTAATATTTGATAtg	x|||||||x|x|xx|x:||||x|xx	tCAGTGCACT-AC-A-GAACTTTgt	SELENOF
bta-miR-148a	ENSBTAT00000072567	ENSBTAG00000013063	1371	1392	-18.98	tGTCACGTGAAGTacacagata	x|||||||||x||xxxxxxxxx	tCAGTGCACTACAgaactttgt	ITGB1BP1
bta-miR-148a	ENSBTAT00000072594	ENSBTAG00000047416	595	621	-21.58	aGTCACGTTGACATGGTTCTTGAAcct	x|||||||x||xx||xx|||||||xxx	tCAGTGCA-CT--AC--AGAACTTtgt	HEPH
bta-miR-148a	ENSBTAT00000072598	ENSBTAG00000009845	1710	1731	-12.43	cGTCACGTtctccggccggtgc	x|||||||xxxxxxxxxxxxxx	tCAGTGCActacagaactttgt	ITPK1
bta-miR-148a	ENSBTAT00000072606	ENSBTAG00000011189	15	36	-15.87	gGTCACGTCGTcgccgccttcc	x|||||||x:|xxxxxxxxxxx	tCAGTGCACTAcagaactttgt	TJAP1
bta-miR-148a	ENSBTAT00000072636	ENSBTAG00000054688	1666	1687	-15.27	tGTCACGTAAAGATAAGAAAcc	x|||||||x|x|x:xx||||xx	tCAGTGCACTACAGAACTTTgt	-
bta-miR-148a	ENSBTAT00000072693	ENSBTAG00000001597	1256	1279	-20.99	gGTCACGTGTCCTGTCgcaccagg	x||||||||xxx||||xxxxxxxx	tCAGTGCACT--ACAGaactttgt	PITPNM2
bta-miR-148a	ENSBTAT00000072702	ENSBTAG00000001771	764	784	-17.72	aGTCACGTGG-GACCTGccctc	x||||||||:x|x|x||xxxxx	tCAGTGCACTACAGAACtttgt	DYRK1A
bta-miR-148a	ENSBTAT00000072713	ENSBTAG00000044032	335	356	-13.74	gGTCACGTccactaccgacgtg	x|||||||xxxxxxxxxxxxxx	tCAGTGCActacagaactttgt	KDM2A
bta-miR-148a	ENSBTAT00000072716	ENSBTAG00000009330	274	292	-18.67	gGTCACGTGA---CTAGGAGgg	x|||||||||xxx||x|:|:xx	tCAGTGCACTACAGAACTTTgt	SIN3B
bta-miR-148a	ENSBTAT00000072725	ENSBTAG00000006697	1628	1649	-19.35	tGTCACGTGCAT-TCTTGttaag	x||||||||x||x|||||xxxxx	tCAGTGCAC-TACAGAACtttgt	RICTOR
bta-miR-148a	ENSBTAT00000072737	ENSBTAG00000011334	1195	1216	-15.98	tGTCACGTACCGTCTcagccac	x|||||||xxx||||xxxxxxx	tCAGTGCACTACAGAactttgt	NADK2
bta-miR-148a	ENSBTAT00000072745	ENSBTAG00000002277	533	553	-12.8	tGTCACGTC-TGTATATATAta	x|||||||xx|||x|xx|x|xx	tCAGTGCACTACAGAACTTTgt	MLLT1
bta-miR-148a	ENSBTAT00000072746	ENSBTAG00000055062	526	546	-12.11	cGTCACGT-ATCACAAGGTAgt	x|||||||x||xx|xx|:x|xx	tCAGTGCACTACAGAACTTTgt	SMAD5
bta-miR-148a	ENSBTAT00000072751	ENSBTAG00000000494	540	563	-20.27	aGTCACGTCGAGTGGCTTGGtgtg	x|||||||x||x||x||||:xxxx	tCAGTGCA-CT-ACAGAACTttgt	PDE4D
bta-miR-148a	ENSBTAT00000072755	ENSBTAG00000018225	1962	1983	-17.03	gGTCACGTGGCTCCTacccctc	x||||||||:xxx||xxxxxxx	tCAGTGCACTACAGAactttgt	SIPA1L3
bta-miR-148a	ENSBTAT00000072757	ENSBTAG00000052147	567	592	-15.06	cGTCACGTACCCGAAGTCATTAAGac	x|||||||xxxx||x|||x|x||:xx	tCAGTGCA----CTACAGAACTTTgt	-
bta-miR-148a	ENSBTAT00000072855	ENSBTAG00000010967	191	212	-13.34	tGTCACGTTATTTaagtctccg	x|||||||x||x|xxxxxxxxx	tCAGTGCACTACAgaactttgt	CABCOCO1
bta-miR-148a	ENSBTAT00000072873	ENSBTAG00000006396	53	74	-15.04	cGTCACGTctgagacccgtccg	x|||||||xxxxxxxxxxxxxx	tCAGTGCActacagaactttgt	GPI
bta-miR-148a	ENSBTAT00000072874	ENSBTAG00000001657	1125	1146	-12.02	tGTCACGTCAAATTAAGAAGta	x|||||||x|xx|:xx|||:xx	tCAGTGCACTACAGAACTTTgt	PICALM
bta-miR-148a	ENSBTAT00000072889	ENSBTAG00000020657	138	160	-18.04	aGTCACGTCGGTacgggcccccg	x|||||||x|:|xxxxxxxxxxx	tCAGTGCA-CTAcagaactttgt	FAT1
bta-miR-148a	ENSBTAT00000072910	ENSBTAG00000013152	1774	1795	-11.55	cGTCACGTCAAGgaagacggga	x|||||||x|x|xxxxxxxxxx	tCAGTGCACTACagaactttgt	NIPSNAP1
bta-miR-148a	ENSBTAT00000072929	ENSBTAG00000049766	81	98	-18.91	aGTCACGT-A---CTTGAtgca	x|||||||x|xxx|||||xxxx	tCAGTGCACTACAGAACTttgt	DUSP28
bta-miR-148a	ENSBTAT00000072981	ENSBTAG00000039319	393	416	-13.21	tGTCACGTCTTATGACCTCAccca	x|||||||xxx|||x|x|x|xxxx	tCAGTGCAC--TACAGAACTttgt	CYP4F2
bta-miR-148a	ENSBTAT00000073017	ENSBTAG00000012552	764	783	-22.02	aGTCACGT--TGTCTTGttttt	x|||||||xx|||||||xxxxx	tCAGTGCACTACAGAACtttgt	FMR1
bta-miR-148a	ENSBTAT00000073041	ENSBTAG00000010073	1184	1206	-14.86	cGTCACGTCGTAGGTTCGGGGtc	x|||||||x:|x|x:|x|:::xx	tCAGTGCACTA-CAGAACTTTgt	FLOT2
bta-miR-148a	ENSBTAT00000073042	ENSBTAG00000050195	226	250	-18.04	tGTCACGTGAGTAGATCTTTAttac	x|||||||||x|x|x||||x|xxxx	tCAGTGCACT-A-C-AGAACTttgt	FAM172A
bta-miR-148a	ENSBTAT00000073062	ENSBTAG00000050195	226	250	-18.04	tGTCACGTGAGTAGATCTTTAttac	x|||||||||x|x|x||||x|xxxx	tCAGTGCACT-A-C-AGAACTttgt	FAM172A
bta-miR-148a	ENSBTAT00000073084	ENSBTAG00000020087	1451	1471	-16.83	tGTCACGTC-TGTCATctaggt	x|||||||xx||||x|xxxxxx	tCAGTGCACTACAGAActttgt	CAMK2A
bta-miR-148a	ENSBTAT00000073123	ENSBTAG00000000094	284	304	-12.72	tGTCACGT-ATATTaattcagt	x|||||||x||x|:xxxxxxxx	tCAGTGCACTACAGaactttgt	ATPAF1
bta-miR-148a	ENSBTAT00000073147	ENSBTAG00000043958	4097	4118	-16.91	aGTCACGTCCAGTCaaaaggat	x|||||||xxx|||xxxxxxxx	tCAGTGCACTACAGaactttgt	TMEM33
bta-miR-148a	ENSBTAT00000073201	ENSBTAG00000006982	2174	2194	-13.14	cGTCACGTCGC-TCTCGCAtcg	x|||||||x:xx|||x|x|xxx	tCAGTGCACTACAGAACTTtgt	RAB5C
bta-miR-148a	ENSBTAT00000073232	ENSBTAG00000002148	935	963	-19.31	gGTCACGTCCGATACGATGTCCTTATAac	x|||||||xxxxxxx||||||x|x|x|xx	tCAGTGCA-------CTACAGAACTTTgt	RAB3D
bta-miR-148a	ENSBTAT00000073317	ENSBTAG00000002277	533	553	-12.8	tGTCACGTC-TGTATATATAta	x|||||||xx|||x|xx|x|xx	tCAGTGCACTACAGAACTTTgt	MLLT1
bta-miR-148a	ENSBTAT00000073376	ENSBTAG00000016768	2663	2684	-14.8	cGTCACGTGtaaatagactcag	x||||||||xxxxxxxxxxxxx	tCAGTGCACtacagaactttgt	SCN3B
bta-miR-148a	ENSBTAT00000073451	ENSBTAG00000018478	11	32	-18.5	gGTCACGTGAcaaaagtccatg	x|||||||||xxxxxxxxxxxx	tCAGTGCACTacagaactttgt	RPL7L1
bta-miR-148a	ENSBTAT00000073454	ENSBTAG00000051086	182	203	-21.13	gGTCACGTGGTcggggttcgta	x||||||||:|xxxxxxxxxxx	tCAGTGCACTAcagaactttgt	-
bta-miR-148a	ENSBTAT00000073460	ENSBTAG00000011833	1415	1436	-16.07	gGTCACGTGcagcgactactct	x||||||||xxxxxxxxxxxxx	tCAGTGCACtacagaactttgt	GRIA3
bta-miR-148a	ENSBTAT00000073469	ENSBTAG00000020898	419	442	-13.14	tGTCACGTCCGCCGTCCTcgtcca	x|||||||xx|xx|||x|xxxxxx	tCAGTGCA--CTACAGAActttgt	CHST12
bta-miR-148a	ENSBTAT00000073486	ENSBTAG00000054481	2329	2352	-14.61	tGTCACGTCTGGTGACagttttca	x|||||||xx|:||x|xxxxxxxx	tCAGTGCA--CTACAGaactttgt	TMEM92
bta-miR-148a	ENSBTAT00000073489	ENSBTAG00000051211	1756	1779	-16.72	gGTCACGTAGGAGGTGTGGGtccc	x|||||||xx||x||x|x|:xxxx	tCAGTGCA--CTACAGAACTttgt	DUSP8
bta-miR-148a	ENSBTAT00000073543	ENSBTAG00000017797	10	34	-17.76	aGTCACGTTTAATCGTTTGGAGAtc	x|||||||xxx||x||:|x||:|xx	tCAGTGCAC--TA-CAGAACTTTgt	LY75
bta-miR-148a	ENSBTAT00000073577	ENSBTAG00000008672	963	984	-13.19	gGTCACGTCCTTTacgcccaaa	x|||||||xx|x|xxxxxxxxx	tCAGTGCACTACAgaactttgt	GABRD
bta-miR-148a	ENSBTAT00000073579	ENSBTAG00000003038	308	329	-14.21	tGTCACGTATTAAAATGAAAag	x|||||||xx|xxxx|||||xx	tCAGTGCACTACAGAACTTTgt	TAP2
bta-miR-148a	ENSBTAT00000073582	ENSBTAG00000051295	17	38	-13.19	gGTCACGTccctcccagtactt	x|||||||xxxxxxxxxxxxxx	tCAGTGCActacagaactttgt	FXYD4
bta-miR-148a	ENSBTAT00000073622	ENSBTAG00000054103	487	508	-16.43	cGTCACGTAGTGgggccggccg	x|||||||x:||xxxxxxxxxx	tCAGTGCACTACagaactttgt	SLC66A2
bta-miR-148a	ENSBTAT00000073643	ENSBTAG00000010278	208	229	-13.53	aGTCACGTcccagccccgcccc	x|||||||xxxxxxxxxxxxxx	tCAGTGCActacagaactttgt	STPG1
bta-miR-148a	ENSBTAT00000073645	ENSBTAG00000011509	202	223	-14.26	tGTCACGTCAGATCggagggaa	x|||||||x|xx||xxxxxxxx	tCAGTGCACTACAGaactttgt	SERAC1
bta-miR-148a	ENSBTAT00000073659	ENSBTAG00000001632	257	278	-22.3	aGTCACGTGATTTTGTctcttt	x||||||||||x|:x|xxxxxx	tCAGTGCACTACAGAActttgt	NBR1
bta-miR-148a	ENSBTAT00000073711	ENSBTAG00000054103	487	508	-16.43	cGTCACGTAGTGgggccggccg	x|||||||x:||xxxxxxxxxx	tCAGTGCACTACagaactttgt	SLC66A2
bta-miR-148a	ENSBTAT00000073742	ENSBTAG00000014486	1592	1614	-12.95	tGTCACGTAATAGTAGATAAAtg	x|||||||x||x||xxxx|||xx	tCAGTGCACTA-CAGAACTTTgt	ATP12A
bta-miR-148a	ENSBTAT00000073751	ENSBTAG00000008313	350	370	-14.39	tGTCACGTCG-GACCTGAAGac	x|||||||x:x|x|x||||:xx	tCAGTGCACTACAGAACTTTgt	KLF15
bta-miR-148a	ENSBTAT00000073811	ENSBTAG00000003381	269	290	-11.41	cGTCACGTCACCACTcccccgc	x|||||||x|xxx||xxxxxxx	tCAGTGCACTACAGAactttgt	TENT4A
bta-miR-148a	ENSBTAT00000073874	ENSBTAG00000001763	485	504	-17.92	gGTCACGT--TGTCcactagct	x|||||||xx||||xxxxxxxx	tCAGTGCACTACAGaactttgt	NR2C2AP
bta-miR-148a	ENSBTAT00000073896	ENSBTAG00000011879	273	299	-20.36	cGTCACGTCCCCGACTGGGTTGGGAct	x|||||||xxxx||x||xx|||::|xx	tCAGTGCA----CT-ACAGAACTTTgt	B4GALT2
bta-miR-148a	ENSBTAT00000073931	ENSBTAG00000032680	561	582	-13.22	gGTCACGTTTTAGGGTAAAAgg	x|||||||xx|xxxx|x|||xx	tCAGTGCACTACAGAACTTTgt	TMEM63B
bta-miR-148a	ENSBTAT00000073956	ENSBTAG00000054572	195	216	-15.94	cGTCACGTCCGGTCgagccacc	x|||||||xxx|||xxxxxxxx	tCAGTGCACTACAGaactttgt	PEG3
bta-miR-148a	ENSBTAT00000073962	ENSBTAG00000018324	2059	2080	-13.22	gGTCACGTTTTTTTTTtttttt	x|||||||xx|x|:||xxxxxx	tCAGTGCACTACAGAActttgt	AGO3
bta-miR-148a	ENSBTAT00000074007	ENSBTAG00000014576	5734	5756	-19.4	aGTCACGTGTAGTGGTTGtggta	x||||||||xx||xx|||xxxxx	tCAGTGCACTACAG-AACtttgt	GUCY1A1
bta-miR-148a	ENSBTAT00000074018	ENSBTAG00000002727	523	544	-12.83	tGTCACGTcccgaaaatcgact	x|||||||xxxxxxxxxxxxxx	tCAGTGCActacagaactttgt	PHACTR4
bta-miR-148a	ENSBTAT00000074020	ENSBTAG00000043989	3382	3402	-17.63	aGTCACGTAATC-CTTGAtcgg	x|||||||x||xx|||||xxxx	tCAGTGCACTACAGAACTttgt	EYA3
bta-miR-148a	ENSBTAT00000074103	ENSBTAG00000008218	344	365	-19.32	cGTCACGTAAAATCTCGAAAcg	x|||||||x|xx|||x||||xx	tCAGTGCACTACAGAACTTTgt	NPTN
bta-miR-148a	ENSBTAT00000074104	ENSBTAG00000015885	783	803	-15.36	cGTCACGT-ACCAATCGAGAca	x|||||||x|xxxx|x||:|xx	tCAGTGCACTACAGAACTTTgt	PPFIA4
bta-miR-148a	ENSBTAT00000074110	ENSBTAG00000018072	953	976	-14.06	tGTCACGTATGGAGTATAAAAtaa	x|||||||xx|:x||x|xx||xxx	tCAGTGCA--CTACAGAACTTtgt	FARS2
bta-miR-148a	ENSBTAT00000074118	ENSBTAG00000052516	2905	2925	-15.11	tGTCACGTG-TCACTTacacca	x||||||||x|xx|||xxxxxx	tCAGTGCACTACAGAActttgt	CDA
bta-miR-148a	ENSBTAT00000074133	ENSBTAG00000009655	558	581	-24.41	gGTCACGTGGTAAGTCTGGAccat	x||||||||:|xx||||x||xxxx	tCAGTGCACTA--CAGAACTttgt	TNS3
bta-miR-148a	ENSBTAT00000074137	ENSBTAG00000051936	916	937	-13.89	gGTCACGTAActtaccagaccc	x|||||||x|xxxxxxxxxxxx	tCAGTGCACTacagaactttgt	-
bta-miR-148a	ENSBTAT00000074244	ENSBTAG00000018077	103	123	-16.12	gGTCACGTCGT-TTTCGAcccc	x|||||||x:|x|:|x||xxxx	tCAGTGCACTACAGAACTttgt	LYPD3
bta-miR-148a	ENSBTAT00000074264	ENSBTAG00000009281	212	234	-14.11	gGTCACGTCGATTTATTTAttta	x|||||||x|||x|x||x|xxxx	tCAGTGCA-CTACAGAACTttgt	SPRYD4
bta-miR-148a	ENSBTAT00000074286	ENSBTAG00000003160	873	894	-14.04	cGTCACGTacctactgtcgtcg	x|||||||xxxxxxxxxxxxxx	tCAGTGCActacagaactttgt	LRCH4
bta-miR-148a	ENSBTAT00000074363	ENSBTAG00000016208	1028	1050	-21.4	tGTCACGTCCGTGTCTCGGAGgg	x|||||||xx:|||||x|:|:xx	tCAGTGCAC-TACAGAACTTTgt	TGM2
bta-miR-148a	ENSBTAT00000074371	ENSBTAG00000017627	853	873	-20.9	aGTCACGTGA-GTTATGttgta	x|||||||||x||:x||xxxxx	tCAGTGCACTACAGAACtttgt	STMN4
bta-miR-148a	ENSBTAT00000074378	ENSBTAG00000040190	136	159	-15.1	gGTCACGTCCGGTACCTcctaggt	x|||||||xx|:|xx||xxxxxxx	tCAGTGCA--CTACAGAactttgt	CCDC88B
bta-miR-148a	ENSBTAT00000074393	ENSBTAG00000043951	268	289	-13.89	gGTCACGTacacgagtacacca	x|||||||xxxxxxxxxxxxxx	tCAGTGCActacagaactttgt	IMPA2
bta-miR-148a	ENSBTAT00000074401	ENSBTAG00000011879	273	299	-20.36	cGTCACGTCCCCGACTGGGTTGGGAct	x|||||||xxxx||x||xx|||::|xx	tCAGTGCA----CT-ACAGAACTTTgt	B4GALT2
bta-miR-148a	ENSBTAT00000074418	ENSBTAG00000018064	299	320	-12.11	cGTCACGTacacttagtccttc	x|||||||xxxxxxxxxxxxxx	tCAGTGCActacagaactttgt	FAM221A
bta-miR-148a	ENSBTAT00000074470	ENSBTAG00000015221	1449	1471	-21.87	cGTCACGTTGATGTCTcatcggg	x|||||||x|||||||xxxxxxx	tCAGTGCA-CTACAGAactttgt	PCCB
bta-miR-148a	ENSBTAT00000074485	ENSBTAG00000020079	383	406	-22.89	aGTCACGTGAGCCGTCTgtcctct	x|||||||||xxx||||xxxxxxx	tCAGTGCACTA--CAGAactttgt	MAP3K4
bta-miR-148a	ENSBTAT00000074511	ENSBTAG00000039195	170	192	-17.99	tGTCACGTCGATGACTTtttgta	x|||||||x||||x|||xxxxxx	tCAGTGCA-CTACAGAActttgt	NHS
bta-miR-148a	ENSBTAT00000074528	ENSBTAG00000001632	257	278	-22.3	aGTCACGTGATTTTGTctcttt	x||||||||||x|:x|xxxxxx	tCAGTGCACTACAGAActttgt	NBR1
bta-miR-148a	ENSBTAT00000074603	ENSBTAG00000007888	1236	1257	-15.94	tGTCACGTGGacacgacccggt	x||||||||:xxxxxxxxxxxx	tCAGTGCACTacagaactttgt	EFR3B
bta-miR-148a	ENSBTAT00000074605	ENSBTAG00000009655	558	581	-24.41	gGTCACGTGGTAAGTCTGGAccat	x||||||||:|xx||||x||xxxx	tCAGTGCACTA--CAGAACTttgt	TNS3
bta-miR-148a	ENSBTAT00000074608	ENSBTAG00000030775	528	549	-17.89	gGTCACGTctccacggagggtc	x|||||||xxxxxxxxxxxxxx	tCAGTGCActacagaactttgt	PCBP3
bta-miR-148a	ENSBTAT00000074624	ENSBTAG00000015571	89	110	-14.46	gGTCACGTcgcgcggtactggg	x|||||||xxxxxxxxxxxxxx	tCAGTGCActacagaactttgt	GCLC
bta-miR-148a	ENSBTAT00000074634	ENSBTAG00000010503	37	58	-13.22	gGTCACGTTATcgacaaccgtt	x|||||||x||xxxxxxxxxxx	tCAGTGCACTAcagaactttgt	TIMM9
bta-miR-148a	ENSBTAT00000074650	ENSBTAG00000050974	2781	2802	-16.37	aGTCACGTCAgcgagtcagcac	x|||||||x|xxxxxxxxxxxx	tCAGTGCACTacagaactttgt	PLPP7
bta-miR-148a	ENSBTAT00000074672	ENSBTAG00000004643	433	454	-15.3	gGTCACGTTGTaggataagtga	x|||||||x:|xxxxxxxxxxx	tCAGTGCACTAcagaactttgt	WASL
bta-miR-148a	ENSBTAT00000074676	ENSBTAG00000004532	127	148	-18.27	gGTCACGTGACATGTATAAtgt	x|||||||||xx|x|xx||xxx	tCAGTGCACTACAGAACTTtgt	FGFR1OP2
bta-miR-148a	ENSBTAT00000074704	ENSBTAG00000052518	443	464	-16.48	gGTCACGTGTTccccgagtgac	x||||||||x|xxxxxxxxxxx	tCAGTGCACTAcagaactttgt	TUBB4B
bta-miR-148a	ENSBTAT00000074833	ENSBTAG00000054072	221	242	-16.71	aGTCACGTctcggggacccact	x|||||||xxxxxxxxxxxxxx	tCAGTGCActacagaactttgt	ADM2
bta-miR-148a	ENSBTAT00000074860	ENSBTAG00000021799	414	438	-14.18	cGTCACGTTTTCGGGTCTccgtcgt	x|||||||xx|xxx||||xxxxxxx	tCAGTGCACTA---CAGAactttgt	RCN3
bta-miR-148a	ENSBTAT00000074869	ENSBTAG00000054370	16	36	-14.23	cGTCACGTT-TGTggggtcggg	x|||||||xx|||xxxxxxxxx	tCAGTGCACTACAgaactttgt	-
bta-miR-148a	ENSBTAT00000074879	ENSBTAG00000009655	558	581	-24.41	gGTCACGTGGTAAGTCTGGAccat	x||||||||:|xx||||x||xxxx	tCAGTGCACTA--CAGAACTttgt	TNS3
bta-miR-148a	ENSBTAT00000074880	ENSBTAG00000008150	3103	3122	-16.11	gGTCACGTAAAGG--TGACAca	x|||||||x|x|xxx|||x|xx	tCAGTGCACTACAGAACTTTgt	PKIA
bta-miR-148a	ENSBTAT00000074884	ENSBTAG00000012552	764	783	-22.02	aGTCACGT--TGTCTTGttttt	x|||||||xx|||||||xxxxx	tCAGTGCACTACAGAACtttgt	FMR1
bta-miR-148a	ENSBTAT00000074897	ENSBTAG00000053244	1536	1557	-14.9	tGTCACGTGcacggacctaagg	x||||||||xxxxxxxxxxxxx	tCAGTGCACtacagaactttgt	POLR2D
bta-miR-148a	ENSBTAT00000074925	ENSBTAG00000009806	109	131	-18.98	aGTCACGTCGACTTCTTAAAtgt	x|||||||x||xx||||x||xxx	tCAGTGCA-CTACAGAACTTtgt	INVS
bta-miR-148a	ENSBTAT00000074939	ENSBTAG00000016355	47	69	-14.37	gGTCACGTCGAaataggagtaaa	x|||||||x||xxxxxxxxxxxx	tCAGTGCA-CTacagaactttgt	UVRAG
bta-miR-148a	ENSBTAT00000074954	ENSBTAG00000019839	21	45	-16.15	tGTCACGTCTCATATGTCC-GAAtcc	x|||||||xxxxx|||||xx|||xxx	tCAGTGCAC----TACAGAACTTtgt	LTBP1
bta-miR-148a	ENSBTAT00000074972	ENSBTAG00000012564	263	284	-12.38	tGTCACGTctcctccacggtcc	x|||||||xxxxxxxxxxxxxx	tCAGTGCActacagaactttgt	KANSL1
bta-miR-148a	ENSBTAT00000074976	ENSBTAG00000001632	257	278	-22.3	aGTCACGTGATTTTGTctcttt	x||||||||||x|:x|xxxxxx	tCAGTGCACTACAGAActttgt	NBR1
bta-miR-148a	ENSBTAT00000074978	ENSBTAG00000014605	1629	1650	-14.85	tGTCACGTC-TGTGCATGGGccc	x|||||||xx|||x|x||::xxx	tCAGTGCACTACA-GAACTTtgt	ETV6
bta-miR-148a	ENSBTAT00000075020	ENSBTAG00000050824	2112	2133	-15.46	cGTCACGTcctaccctccgggg	x|||||||xxxxxxxxxxxxxx	tCAGTGCActacagaactttgt	HS6ST1
bta-miR-148a	ENSBTAT00000075048	ENSBTAG00000009123	287	311	-19.07	cGTCACGTGGTCGGTGCGTGGGGtg	x||||||||:|xx||x|x||:::xx	tCAGTGCACTA--CA-GAACTTTgt	ING5
bta-miR-148a	ENSBTAT00000075061	ENSBTAG00000054309	973	994	-16.51	aGTCACGTCCTCTgggtccaaa	x|||||||xx|x|xxxxxxxxx	tCAGTGCACTACAgaactttgt	-
bta-miR-148a	ENSBTAT00000075080	ENSBTAG00000019725	2633	2654	-20.94	tGTCACGTCGTAGTCG-GAGAcc	x|||||||x:|x|||xx||:|xx	tCAGTGCACTA-CAGAACTTTgt	UBE4A
bta-miR-148a	ENSBTAT00000075087	ENSBTAG00000010989	473	494	-12.02	tGTCACGTCACGcagacccccg	x|||||||x|x|xxxxxxxxxx	tCAGTGCACTACagaactttgt	PIK3R1
bta-miR-148a	ENSBTAT00000075104	ENSBTAG00000049571	3097	3118	-13.05	tGTCACGTCAaaagggaaggag	x|||||||x|xxxxxxxxxxxx	tCAGTGCACTacagaactttgt	CNOT6L
bta-miR-148a	ENSBTAT00000075105	ENSBTAG00000005481	1921	1941	-16.75	aGTCACGTGCA-TAGAGAAAag	x||||||||xxx|xxx||||xx	tCAGTGCACTACAGAACTTTgt	ADAM10
bta-miR-148a	ENSBTAT00000075160	ENSBTAG00000009328	776	799	-20.91	gGTCACGTGTCGTTAATAGAActa	x||||||||xx||:xx|x|||xxx	tCAGTGCACTACAG--AACTTtgt	NWD1
bta-miR-148a	ENSBTAT00000075254	ENSBTAG00000052466	33	56	-12.69	tGTCACGTCTCAGCTCTTCAcgga	x|||||||xxx|xx||||x|xxxx	tCAGTGCAC--TACAGAACTttgt	-
bta-miR-148a	ENSBTAT00000075297	ENSBTAG00000039819	2080	2101	-16.44	cGTCACGTGTAACCTTccgggg	x||||||||xxxx|||xxxxxx	tCAGTGCACTACAGAActttgt	RPH3AL
bta-miR-148a	ENSBTAT00000075486	ENSBTAG00000002651	67	87	-18.85	tGTCACGTGA-GTagtatacat	x|||||||||x||xxxxxxxxx	tCAGTGCACTACAgaactttgt	PKP2
bta-miR-148a	ENSBTAT00000075534	ENSBTAG00000002539	590	612	-15.67	gGTCACGTTGGTTTTTTtttttc	x|||||||x|:|x|:||xxxxxx	tCAGTGCA-CTACAGAActttgt	TRIOBP
bta-miR-148a	ENSBTAT00000075565	ENSBTAG00000044074	165	187	-15.6	aGTCACGTTGTTTCGTTGTAGtt	x|||||||x:|x||x|||x|:xx	tCAGTGCACTACAG-AACTTTgt	MLLT10
bta-miR-148a	ENSBTAT00000075591	ENSBTAG00000005161	602	623	-21.13	gGTCACGTGGcccacacggccg	x||||||||:xxxxxxxxxxxx	tCAGTGCACTacagaactttgt	ATP8B2
bta-miR-148a	ENSBTAT00000075612	ENSBTAG00000003455	19	40	-20.93	cGTCACGTGGTccgaagggaca	x||||||||:|xxxxxxxxxxx	tCAGTGCACTAcagaactttgt	ANKRD6
bta-miR-148a	ENSBTAT00000075643	ENSBTAG00000021964	81	101	-13.89	gGTCACGT-ATacaacctactt	x|||||||x||xxxxxxxxxxx	tCAGTGCACTAcagaactttgt	CDH17
bta-miR-148a	ENSBTAT00000075646	ENSBTAG00000018862	543	565	-16.96	aGTCACGTTTTAGTCTaattcat	x|||||||xx|x||||xxxxxxx	tCAGTGCACTA-CAGAactttgt	EIF4E3
bta-miR-148a	ENSBTAT00000075679	ENSBTAG00000019418	26	47	-17.12	gGTCACGTGGgcacgactcctc	x||||||||:xxxxxxxxxxxx	tCAGTGCACTacagaactttgt	UBE3D
bta-miR-148a	ENSBTAT00000075695	ENSBTAG00000049620	779	800	-14.76	cGTCACGTGTTcaagttaccct	x||||||||x|xxxxxxxxxxx	tCAGTGCACTAcagaactttgt	-
bta-miR-148a	ENSBTAT00000075709	ENSBTAG00000021065	1634	1655	-13.53	aGTCACGTcccaccctccctgc	x|||||||xxxxxxxxxxxxxx	tCAGTGCActacagaactttgt	MFSD13A
bta-miR-148a	ENSBTAT00000075711	ENSBTAG00000022890	1259	1279	-17.54	tGTCACGT-ATGAAAGGAActc	x|||||||x|||xxxx|||xxx	tCAGTGCACTACAGAACTTtgt	MBP
bta-miR-148a	ENSBTAT00000075724	ENSBTAG00000002881	1236	1257	-14	aGTCACGTccgagcccctcctt	x|||||||xxxxxxxxxxxxxx	tCAGTGCActacagaactttgt	AP4M1
bta-miR-148a	ENSBTAT00000075740	ENSBTAG00000021174	83	104	-13.22	gGTCACGTttttaagttacctt	x|||||||xxxxxxxxxxxxxx	tCAGTGCActacagaactttgt	NRDC
bta-miR-148a	ENSBTAT00000075741	ENSBTAG00000049516	2264	2291	-20.84	aGTCACGTTATTTAAGTGTTTTGATAta	x|||||||x||xxxxxx||:||||x|xx	tCAGTGCACTA------CAGAACTTTgt	ARL6IP1
bta-miR-148a	ENSBTAT00000075759	ENSBTAG00000011589	401	422	-17.11	gGTCACGTGGacacactgaccg	x||||||||:xxxxxxxxxxxx	tCAGTGCACTacagaactttgt	CDC14B
bta-miR-148a	ENSBTAT00000075870	ENSBTAG00000011509	202	223	-14.26	tGTCACGTCAGATCggagggaa	x|||||||x|xx||xxxxxxxx	tCAGTGCACTACAGaactttgt	SERAC1
bta-miR-148a	ENSBTAT00000075872	ENSBTAG00000015885	783	803	-15.36	cGTCACGT-ACCAATCGAGAca	x|||||||x|xxxx|x||:|xx	tCAGTGCACTACAGAACTTTgt	PPFIA4
bta-miR-148a	ENSBTAT00000075886	ENSBTAG00000034441	99	120	-16.5	tGTCACGTGcacgcgcggtcgc	x||||||||xxxxxxxxxxxxx	tCAGTGCACtacagaactttgt	MACROD2
bta-miR-148a	ENSBTAT00000075901	ENSBTAG00000020454	1029	1050	-19.25	cGTCACGTGGTTTCTAGttcgt	x||||||||:|x|||x|xxxxx	tCAGTGCACTACAGAACtttgt	LZTS3
bta-miR-148a	ENSBTAT00000075925	ENSBTAG00000012394	824	847	-11.44	cGTCACGTTATAAAATTTCAAAtg	x|||||||x||xxxx:||x|||xx	tCAGTGCACTACA--GAACTTTgt	CCDC85A
bta-miR-148a	ENSBTAT00000075948	ENSBTAG00000004802	1015	1038	-19.1	aGTCACGTCTGCGGTCcgccccgc	x|||||||xx|xx|||xxxxxxxx	tCAGTGCA--CTACAGaactttgt	CEP170B
bta-miR-148a	ENSBTAT00000075955	ENSBTAG00000018661	732	753	-13.19	gGTCACGTCCTTTCacttttca	x|||||||xx|x||xxxxxxxx	tCAGTGCACTACAGaactttgt	TMC6
bta-miR-148a	ENSBTAT00000075959	ENSBTAG00000043989	3382	3402	-17.63	aGTCACGTAATC-CTTGAtcgg	x|||||||x||xx|||||xxxx	tCAGTGCACTACAGAACTttgt	EYA3
bta-miR-148a	ENSBTAT00000075974	ENSBTAG00000022890	1259	1279	-17.54	tGTCACGT-ATGAAAGGAActc	x|||||||x|||xxxx|||xxx	tCAGTGCACTACAGAACTTtgt	MBP
bta-miR-148a	ENSBTAT00000075986	ENSBTAG00000003215	3014	3036	-23.2	tGTCACGTTCTGTTGTTGGAAcg	x|||||||xx|||:x|||:||xx	tCAGTGCACTACAG-AACTTTgt	KIF3B
bta-miR-148a	ENSBTAT00000075987	ENSBTAG00000030775	528	549	-17.89	gGTCACGTctccacggagggtc	x|||||||xxxxxxxxxxxxxx	tCAGTGCActacagaactttgt	PCBP3
bta-miR-148a	ENSBTAT00000076023	ENSBTAG00000010161	284	305	-13.27	cGTCACGTcggcacgtcccatc	x|||||||xxxxxxxxxxxxxx	tCAGTGCActacagaactttgt	CCL21
bta-miR-148a	ENSBTAT00000076041	ENSBTAG00000025181	52	73	-20.92	tGTCACGTGGTGCCTctttcct	x||||||||:||x||xxxxxxx	tCAGTGCACTACAGAactttgt	CCDC85C
bta-miR-148a	ENSBTAT00000076065	ENSBTAG00000010626	463	484	-15.36	cGTCACGTAGGGTCcccctgcc	x|||||||x:x|||xxxxxxxx	tCAGTGCACTACAGaactttgt	SH3GLB2
bta-miR-148a	ENSBTAT00000076089	ENSBTAG00000016571	279	300	-13.47	tGTCACGTCTCTTCTgctccga	x|||||||xxxx|||xxxxxxx	tCAGTGCACTACAGAactttgt	FAM234A
bta-miR-148a	ENSBTAT00000076122	ENSBTAG00000047855	6603	6624	-20.51	tGTCACGTGAcccacccgggac	x|||||||||xxxxxxxxxxxx	tCAGTGCACTacagaactttgt	MECP2
bta-miR-148a	ENSBTAT00000076141	ENSBTAG00000017797	10	34	-17.76	aGTCACGTTTAATCGTTTGGAGAtc	x|||||||xxx||x||:|x||:|xx	tCAGTGCAC--TA-CAGAACTTTgt	LY75
bta-miR-148a	ENSBTAT00000076165	ENSBTAG00000012342	353	374	-20.81	tGTCACGTGATGATTAGTAGag	x|||||||||||x:|x|x|:xx	tCAGTGCACTACAGAACTTTgt	LIMA1
bta-miR-148a	ENSBTAT00000076166	ENSBTAG00000021372	189	210	-12.18	cGTCACGTTATaaactgggtct	x|||||||x||xxxxxxxxxxx	tCAGTGCACTAcagaactttgt	SEPTIN11
bta-miR-148a	ENSBTAT00000076179	ENSBTAG00000000283	447	468	-18.28	aGTCACGTCTGGTCGTccgggt	x|||||||xxx|||x|xxxxxx	tCAGTGCACTACAGAActttgt	CSF1
bta-miR-148a	ENSBTAT00000076188	ENSBTAG00000054158	566	587	-16.04	aGTCACGTTCCGATTTacggtt	x|||||||xxx|x:||xxxxxx	tCAGTGCACTACAGAActttgt	LCLAT1
bta-miR-148a	ENSBTAT00000076208	ENSBTAG00000017999	369	392	-13.56	aGTCACGTTTCAATTTTCGAGtat	x|||||||xxx|xx|:|x||:xxx	tCAGTGCAC--TACAGAACTTtgt	TNRC6A
bta-miR-148a	ENSBTAT00000076217	ENSBTAG00000000379	432	454	-12.81	tGTCACGTTGACCTTTATAAAaa	x|||||||x||xx|:|xx|||xx	tCAGTGCA-CTACAGAACTTTgt	GOLT1B
bta-miR-148a	ENSBTAT00000076226	ENSBTAG00000010401	439	460	-11.44	cGTCACGTtcatcctagtcctt	x|||||||xxxxxxxxxxxxxx	tCAGTGCActacagaactttgt	UBE4B
bta-miR-148a	ENSBTAT00000076235	ENSBTAG00000047743	387	410	-16.03	aGTCACGTCTACGATGATAAAAtc	x|||||||xx|x|x|xx|x|||xx	tCAGTGCAC-TAC-AGAACTTTgt	KCNIP4
bta-miR-148a	ENSBTAT00000076317	ENSBTAG00000017890	398	418	-16.37	gGTCACGTCG-GTCcgcgcccg	x|||||||x:x|||xxxxxxxx	tCAGTGCACTACAGaactttgt	ZMAT5
bta-miR-148a	ENSBTAT00000076356	ENSBTAG00000043989	3382	3402	-17.63	aGTCACGTAATC-CTTGAtcgg	x|||||||x||xx|||||xxxx	tCAGTGCACTACAGAACTttgt	EYA3
bta-miR-148a	ENSBTAT00000076383	ENSBTAG00000003185	3211	3232	-13.19	tGTCACGTTAAGTATCGtcgca	x|||||||x|x||x|x|xxxxx	tCAGTGCACTACAGAACtttgt	ASAP1
bta-miR-148a	ENSBTAT00000076413	ENSBTAG00000017060	122	143	-12.11	cGTCACGTAAaaaccaattgcc	x|||||||x|xxxxxxxxxxxx	tCAGTGCACTacagaactttgt	ITGB2
bta-miR-148a	ENSBTAT00000076423	ENSBTAG00000013544	289	310	-13.53	aGTCACGTccgaccgaaagaga	x|||||||xxxxxxxxxxxxxx	tCAGTGCActacagaactttgt	LGALS8
bta-miR-148a	ENSBTAT00000076444	ENSBTAG00000014319	56	78	-12.39	tGTCACGTTTACTTTCCGAAAat	x|||||||xxxx|:|xx||||xx	tCAGTGCACTACAGAA-CTTTgt	DNM3
bta-miR-148a	ENSBTAT00000076575	ENSBTAG00000020446	657	678	-20.12	cGTCACGTGAccggtcaccggt	x|||||||||xxxxxxxxxxxx	tCAGTGCACTacagaactttgt	THOP1
bta-miR-148a	ENSBTAT00000076803	ENSBTAG00000009655	558	581	-24.41	gGTCACGTGGTAAGTCTGGAccat	x||||||||:|xx||||x||xxxx	tCAGTGCACTA--CAGAACTttgt	TNS3
bta-miR-148a	ENSBTAT00000076819	ENSBTAG00000015980	214	235	-19.53	gGTCACGTCGTCTCGGGCAcgc	x|||||||x:|x||xx|x|xxx	tCAGTGCACTACAGAACTTtgt	FASN
bta-miR-148a	ENSBTAT00000076822	ENSBTAG00000011786	173	190	-17.15	gGTCACGT----TCTTGTAGag	x|||||||xxxx|||||x|:xx	tCAGTGCACTACAGAACTTTgt	CLUH
bta-miR-148a	ENSBTAT00000076888	ENSBTAG00000014255	62	82	-14.49	cGTCACGTACT-TTTTGAccga	x|||||||xx|x|:||||xxxx	tCAGTGCACTACAGAACTttgt	VPS50
bta-miR-148a	ENSBTAT00000076904	ENSBTAG00000017999	369	392	-13.56	aGTCACGTTTCAATTTTCGAGtat	x|||||||xxx|xx|:|x||:xxx	tCAGTGCAC--TACAGAACTTtgt	TNRC6A
bta-miR-148a	ENSBTAT00000076925	ENSBTAG00000015885	783	803	-15.36	cGTCACGT-ACCAATCGAGAca	x|||||||x|xxxx|x||:|xx	tCAGTGCACTACAGAACTTTgt	PPFIA4
bta-miR-148a	ENSBTAT00000076939	ENSBTAG00000017348	1147	1166	-23.91	aGTCACGTGAA--CTTGGAGat	x|||||||||xxx||||:|:xx	tCAGTGCACTACAGAACTTTgt	FGF5
bta-miR-148a	ENSBTAT00000076948	ENSBTAG00000016414	1	22	-15.86	gGTCACGTCCGGCGGTCTcagt---	x|||||||xxx|xx||||xxxxxxx	tCAGTGCA---CTACAGAactttgt	VDR
bta-miR-148a	ENSBTAT00000076951	ENSBTAG00000010626	463	484	-15.36	cGTCACGTAGGGTCcccctgcc	x|||||||x:x|||xxxxxxxx	tCAGTGCACTACAGaactttgt	SH3GLB2
bta-miR-148a	ENSBTAT00000076953	ENSBTAG00000013488	158	182	-20.46	tGTCACGTCGACTGTCCTTGGtcga	x|||||||x||x||||x|||:xxxx	tCAGTGCA-CT-ACAG-AACTttgt	PPP1R14D
bta-miR-148a	ENSBTAT00000076974	ENSBTAG00000009655	558	581	-24.41	gGTCACGTGGTAAGTCTGGAccat	x||||||||:|xx||||x||xxxx	tCAGTGCACTA--CAGAACTttgt	TNS3
bta-miR-148a	ENSBTAT00000076986	ENSBTAG00000018285	164	185	-16.06	gGTCACGTCGTccaacgggagt	x|||||||x:|xxxxxxxxxxx	tCAGTGCACTAcagaactttgt	VAMP5
bta-miR-148a	ENSBTAT00000077023	ENSBTAG00000019839	21	45	-16.15	tGTCACGTCTCATATGTCC-GAAtcc	x|||||||xxxxx|||||xx|||xxx	tCAGTGCAC----TACAGAACTTtgt	LTBP1
bta-miR-148a	ENSBTAT00000077041	ENSBTAG00000014319	116	138	-12.39	tGTCACGTTTACTTTCCGAAAat	x|||||||xxxx|:|xx||||xx	tCAGTGCACTACAGAA-CTTTgt	DNM3
bta-miR-148a	ENSBTAT00000077049	ENSBTAG00000010073	1184	1206	-14.86	cGTCACGTCGTAGGTTCGGGGtc	x|||||||x:|x|x:|x|:::xx	tCAGTGCACTA-CAGAACTTTgt	FLOT2
bta-miR-148a	ENSBTAT00000077074	ENSBTAG00000006451	280	297	-12.6	tGTCACGT----TCTTAAAGgg	x|||||||xxxx||||x||:xx	tCAGTGCACTACAGAACTTTgt	GAP43
bta-miR-148a	ENSBTAT00000077141	ENSBTAG00000010837	412	433	-14.14	cGTCACGTacactcgtccgtgt	x|||||||xxxxxxxxxxxxxx	tCAGTGCActacagaactttgt	HTR4
bta-miR-148a	ENSBTAT00000077167	ENSBTAG00000001826	487	507	-18.11	gGTCACGTCG-GTCTAAAAGaa	x|||||||x:x||||xx||:xx	tCAGTGCACTACAGAACTTTgt	SASH1
bta-miR-148a	ENSBTAT00000077207	ENSBTAG00000051269	373	393	-15.21	gGTCACGTT-TGAAAGGAAGtc	x|||||||xx||xxxx|||:xx	tCAGTGCACTACAGAACTTTgt	-
bta-miR-148a	ENSBTAT00000077213	ENSBTAG00000009569	141	161	-22.49	aGTCACGTG-TGTCTcctcttg	x||||||||x|||||xxxxxxx	tCAGTGCACTACAGAactttgt	DOCK6
bta-miR-148a	ENSBTAT00000077243	ENSBTAG00000021051	111	134	-15.29	gGTCACGTCCAAAGGTTTAAccat	x|||||||xxx|x|x:||x|xxxx	tCAGTGCAC--TACAGAACTttgt	ZNHIT6
bta-miR-148a	ENSBTAT00000077265	ENSBTAG00000001657	1125	1146	-12.02	tGTCACGTCAAATTAAGAAGta	x|||||||x|xx|:xx|||:xx	tCAGTGCACTACAGAACTTTgt	PICALM
bta-miR-148a	ENSBTAT00000077288	ENSBTAG00000005183	588	608	-23.17	gGTCACGTGGCGTGT-GAGAgg	x||||||||:x||x|x||:|xx	tCAGTGCACTACAGAACTTTgt	MVK
bta-miR-148a	ENSBTAT00000077353	ENSBTAG00000020355	654	674	-21.22	tGTCACGTATTGTCT-GACAga	x|||||||xx|||||x||x|xx	tCAGTGCACTACAGAACTTTgt	KLF4
bta-miR-148a	ENSBTAT00000077363	ENSBTAG00000052514	2027	2049	-13.19	gGTCACGTCCTCTACTCCTAAac	x|||||||xx|x|x||xxx||xx	tCAGTGCACTACA-GAACTTTgt	-
bta-miR-148a	ENSBTAT00000077364	ENSBTAG00000021050	258	279	-12.05	tGTCACGTttgaccacctccga	x|||||||xxxxxxxxxxxxxx	tCAGTGCActacagaactttgt	ECEL1
bta-miR-148a	ENSBTAT00000077373	ENSBTAG00000021491	369	390	-11.41	cGTCACGTCATcaatcaatgtt	x|||||||x||xxxxxxxxxxx	tCAGTGCACTAcagaactttgt	NDUFV3
bta-miR-148a	ENSBTAT00000077400	ENSBTAG00000016470	610	630	-15.23	cGTCACGTG-TGcgccgcccca	x||||||||x||xxxxxxxxxx	tCAGTGCACTACagaactttgt	NADSYN1
bta-miR-148a	ENSBTAT00000077401	ENSBTAG00000004364	119	142	-22.22	cGTCACGTGGGGGTCGTTGTAGat	x||||||||:x|x||x|||x|:xx	tCAGTGCACTAC-AG-AACTTTgt	THNSL2
bta-miR-148a	ENSBTAT00000077424	ENSBTAG00000054103	633	654	-16.43	cGTCACGTAGTGgggccggccg	x|||||||x:||xxxxxxxxxx	tCAGTGCACTACagaactttgt	SLC66A2
bta-miR-148a	ENSBTAT00000077431	ENSBTAG00000002136	27	48	-15.96	cGTCACGTctcggccccggtcg	x|||||||xxxxxxxxxxxxxx	tCAGTGCActacagaactttgt	FCHO1
bta-miR-148a	ENSBTAT00000077455	ENSBTAG00000014220	126	147	-13.56	aGTCACGTTTTTTTTTtcactc	x|||||||xx|x|:||xxxxxx	tCAGTGCACTACAGAActttgt	-
bta-miR-148a	ENSBTAT00000077490	ENSBTAG00000017970	268	291	-16.01	cGTCACGTTCGTCGTCACGAGtcg	x|||||||xx|xx|||xx||:xxx	tCAGTGCA--CTACAGAACTTtgt	ZYX
bta-miR-148a	ENSBTAT00000077508	ENSBTAG00000013591	380	401	-12.05	tGTCACGTTACATTTTAAAtta	x|||||||x|xx|:||x||xxx	tCAGTGCACTACAGAACTTtgt	CYB5R4
bta-miR-148a	ENSBTAT00000077545	ENSBTAG00000020037	1623	1642	-18.38	cGTCACGTCCT--TTTGAGAta	x|||||||xx|xx:||||:|xx	tCAGTGCACTACAGAACTTTgt	CYB5RL
bta-miR-148a	ENSBTAT00000077547	ENSBTAG00000049599	2671	2692	-12.02	tGTCACGTCACCTCaccccact	x|||||||x|xx||xxxxxxxx	tCAGTGCACTACAGaactttgt	FAM163A
bta-miR-148a	ENSBTAT00000077684	ENSBTAG00000002278	433	455	-12.72	tGTCACGTAAATATTTAGAtcaa	x|||||||x|x|x|:|x||xxxx	tCAGTGCACT-ACAGAACTttgt	FBN1
bta-miR-148a	ENSBTAT00000077722	ENSBTAG00000010380	844	865	-23.19	aGTCACGTTATGTCTgtcacgt	x|||||||x||||||xxxxxxx	tCAGTGCACTACAGAactttgt	INO80
bta-miR-148a	ENSBTAT00000077798	ENSBTAG00000010345	2364	2385	-17.14	gGTCACGTGCACGG-TTGTAAtg	x||||||||x|x|xx|||x||xx	tCAGTGCAC-TACAGAACTTTgt	XPNPEP2
bta-miR-148a	ENSBTAT00000077847	ENSBTAG00000005893	512	537	-17.13	aGTCACGTTCTCTACGTCTTTGAtct	x|||||||xx|xxxx|||||x:|xxx	tCAGTGCACTA----CAGAACTTtgt	TMEM68
bta-miR-148a	ENSBTAT00000077888	ENSBTAG00000014106	587	607	-14.87	gGTCACGT-ATAACATGttggg	x|||||||x||xx|x||xxxxx	tCAGTGCACTACAGAACtttgt	IPO8
bta-miR-148a	ENSBTAT00000077891	ENSBTAG00000048501	1827	1848	-15.12	tGTCACGTTTAGGGTTTAGAgt	x|||||||xxx|xx||x|:|xx	tCAGTGCACTACAGAACTTTgt	ST8SIA2
bta-miR-148a	ENSBTAT00000077908	ENSBTAG00000003235	97	116	-14.23	aGTCACGTACGGAC--GAAAgg	x|||||||xxx|x|xx||||xx	tCAGTGCACTACAGAACTTTgt	DHDDS
bta-miR-148a	ENSBTAT00000077918	ENSBTAG00000024015	158	175	-14.4	cGTCACGT----TCGTCAAAat	x|||||||xxxx||x|x|||xx	tCAGTGCACTACAGAACTTTgt	PTPRM
bta-miR-148a	ENSBTAT00000077939	ENSBTAG00000020454	1029	1050	-19.25	cGTCACGTGGTTTCTAGttcgt	x||||||||:|x|||x|xxxxx	tCAGTGCACTACAGAACtttgt	LZTS3
bta-miR-148a	ENSBTAT00000077951	ENSBTAG00000014255	62	82	-14.49	cGTCACGTACT-TTTTGAccga	x|||||||xx|x|:||||xxxx	tCAGTGCACTACAGAACTttgt	VPS50
bta-miR-148a	ENSBTAT00000078024	ENSBTAG00000014619	509	531	-19.06	tGTCACGTTCGA-GTCTgtcgact	x|||||||xx||x||||xxxxxxx	tCAGTGCA--CTACAGAactttgt	WASF3
bta-miR-148a	ENSBTAT00000078060	ENSBTAG00000050385	1267	1289	-15.57	cGTCACGTCTGGGTCTccgtcca	x|||||||xx:x||||xxxxxxx	tCAGTGCAC-TACAGAactttgt	-
bta-miR-148a	ENSBTAT00000078081	ENSBTAG00000024015	158	175	-14.4	cGTCACGT----TCGTCAAAat	x|||||||xxxx||x|x|||xx	tCAGTGCACTACAGAACTTTgt	PTPRM
bta-miR-148a	ENSBTAT00000078087	ENSBTAG00000043981	822	843	-14.12	aGTCACGTtcaccgacaaaaca	x|||||||xxxxxxxxxxxxxx	tCAGTGCActacagaactttgt	SBF2
bta-miR-148a	ENSBTAT00000078184	ENSBTAG00000001597	1256	1279	-20.99	gGTCACGTGTCCTGTCgcaccagg	x||||||||xxx||||xxxxxxxx	tCAGTGCACT--ACAGaactttgt	PITPNM2
bta-miR-148a	ENSBTAT00000078193	ENSBTAG00000008438	297	318	-13.56	aGTCACGTTTAGACATAAtcca	x|||||||xxx|x|x|x|xxxx	tCAGTGCACTACAGAACTttgt	ARFIP1
bta-miR-148a	ENSBTAT00000078229	ENSBTAG00000008025	811	832	-16.4	cGTCACGTttccgcgtcgcggt	x|||||||xxxxxxxxxxxxxx	tCAGTGCActacagaactttgt	UBE3C
bta-miR-148a	ENSBTAT00000078248	ENSBTAG00000031348	1451	1472	-16.15	aGTCACGTccgaagcaccaaga	x|||||||xxxxxxxxxxxxxx	tCAGTGCActacagaactttgt	CCR9
bta-miR-148a	ENSBTAT00000078410	ENSBTAG00000000395	273	294	-16.84	gGTCACGTTAgacaattgtcgt	x|||||||x|xxxxxxxxxxxx	tCAGTGCACTacagaactttgt	ADAMTS20
bta-miR-148a	ENSBTAT00000078515	ENSBTAG00000049163	722	743	-16.73	aGTCACGTaggaccggcgtcgg	x|||||||xxxxxxxxxxxxxx	tCAGTGCActacagaactttgt	TSPAN9
bta-miR-148a	ENSBTAT00000078569	ENSBTAG00000017955	1654	1676	-16.05	aGTCACGTTGAGGTTcccccagc	x|||||||x||x||:xxxxxxxx	tCAGTGCA-CTACAGaactttgt	KCNIP3
bta-miR-148a	ENSBTAT00000078608	ENSBTAG00000016465	418	440	-11.44	cGTCACGTCCACGTTTcctcttt	x|||||||xx|x||:|xxxxxxx	tCAGTGCAC-TACAGAactttgt	DHCR7
bta-miR-148a	ENSBTAT00000078700	ENSBTAG00000003455	19	40	-20.93	cGTCACGTGGTccgaagggaca	x||||||||:|xxxxxxxxxxx	tCAGTGCACTAcagaactttgt	ANKRD6
bta-miR-148a	ENSBTAT00000078732	ENSBTAG00000043981	822	843	-14.12	aGTCACGTtcaccgacaaaaca	x|||||||xxxxxxxxxxxxxx	tCAGTGCActacagaactttgt	SBF2
bta-miR-148a	ENSBTAT00000078796	ENSBTAG00000009183	304	325	-14.82	tGTCACGTaggacgggtgtgtt	x|||||||xxxxxxxxxxxxxx	tCAGTGCActacagaactttgt	SHISA5
bta-miR-148a	ENSBTAT00000078813	ENSBTAG00000055014	747	769	-17.45	aGTCACGTGGAGAACTTTATAtg	x||||||||:x|xx|||x|x|xx	tCAGTGCACTACA-GAACTTTgt	SH3BGRL2
bta-miR-148a	ENSBTAT00000078831	ENSBTAG00000004344	349	367	-17.72	gGTCACGTGC---CCTGAGAaa	x||||||||xxxx|x|||:|xx	tCAGTGCACTACAGAACTTTgt	ACSL1
bta-miR-148a	ENSBTAT00000078857	ENSBTAG00000010989	473	494	-12.02	tGTCACGTCACGcagacccccg	x|||||||x|x|xxxxxxxxxx	tCAGTGCACTACagaactttgt	PIK3R1
bta-miR-148a	ENSBTAT00000078933	ENSBTAG00000001597	1256	1279	-20.99	gGTCACGTGTCCTGTCgcaccagg	x||||||||xxx||||xxxxxxxx	tCAGTGCACT--ACAGaactttgt	PITPNM2
bta-miR-148a	ENSBTAT00000078939	ENSBTAG00000008636	953	972	-12.77	cGTCACGT--TCTCTTtctgcc	x|||||||xx|x||||xxxxxx	tCAGTGCACTACAGAActttgt	PDE4B
bta-miR-148a	ENSBTAT00000078946	ENSBTAG00000020860	179	200	-13.8	tGTCACGTCGTATTAGGAAttt	x|||||||x:|x|:xx|||xxx	tCAGTGCACTACAGAACTTtgt	CHD1
bta-miR-148a	ENSBTAT00000079046	ENSBTAG00000015339	51	72	-12.02	tGTCACGTCACGACTcctaccc	x|||||||x|x|x||xxxxxxx	tCAGTGCACTACAGAactttgt	ENDOV
bta-miR-148a	ENSBTAT00000079050	ENSBTAG00000013108	309	331	-16.1	aGTCACGTCGGTTTTTTTTAAtt	x|||||||x|:|x|:||xx||xx	tCAGTGCA-CTACAGAACTTTgt	HK2
bta-miR-148a	ENSBTAT00000079063	ENSBTAG00000027074	884	905	-12.17	tGTCACGTTAcactcaagtact	x|||||||x|xxxxxxxxxxxx	tCAGTGCACTacagaactttgt	SV2B
bta-miR-148a	ENSBTAT00000079133	ENSBTAG00000053460	2142	2163	-14.14	tGTCACGTCAAATATTtgtcga	x|||||||x|xx|x||xxxxxx	tCAGTGCACTACAGAActttgt	VWC2L
bta-miR-148a	ENSBTAT00000079177	ENSBTAG00000004344	349	367	-17.72	gGTCACGTGC---CCTGAGAaa	x||||||||xxxx|x|||:|xx	tCAGTGCACTACAGAACTTTgt	ACSL1
bta-miR-148a	ENSBTAT00000079179	ENSBTAG00000005152	708	728	-14.8	gGTCACGT-ATcgagaggattc	x|||||||x||xxxxxxxxxxx	tCAGTGCACTAcagaactttgt	-
bta-miR-148a	ENSBTAT00000079189	ENSBTAG00000010018	25	46	-16.65	aGTCACGTCCTGTTGTagtaga	x|||||||xx|||:x|xxxxxx	tCAGTGCACTACAGAActttgt	ATP7A
bta-miR-148a	ENSBTAT00000079287	ENSBTAG00000020281	638	660	-12.02	tGTCACGTCAACTCATTTActca	x|||||||x|xx||x||x|xxxx	tCAGTGCACTACAG-AACTttgt	NIN
bta-miR-148a	ENSBTAT00000079423	ENSBTAG00000004729	247	268	-14.13	cGTCACGTCAcccgggacacgt	x|||||||x|xxxxxxxxxxxx	tCAGTGCACTacagaactttgt	PKMYT1
bta-miR-148a	ENSBTAT00000079478	ENSBTAG00000019757	608	629	-14.38	cGTCACGTGcaacagagagtac	x||||||||xxxxxxxxxxxxx	tCAGTGCACtacagaactttgt	SUDS3
bta-miR-148a	ENSBTAT00000079487	ENSBTAG00000002746	146	168	-15.26	tGTCACGTTATGACGGTGCAAgt	x|||||||x|||x|xx||x||xx	tCAGTGCACTACAGA-ACTTTgt	OSTF1
bta-miR-148a	ENSBTAT00000079492	ENSBTAG00000001810	329	349	-19.29	gGTCACGTGA-GACTTCAAAga	x|||||||||x|x|||x|||xx	tCAGTGCACTACAGAACTTTgt	SCAF11
bta-miR-148a	ENSBTAT00000079520	ENSBTAG00000014482	313	334	-15.07	gGTCACGTTCAGATTTCAGtag	x|||||||xxx|x:||x|:xxx	tCAGTGCACTACAGAACTTtgt	FAF1
bta-miR-148a	ENSBTAT00000079544	ENSBTAG00000054756	781	802	-13.83	aGTCACGTtcgaacacacggta	x|||||||xxxxxxxxxxxxxx	tCAGTGCActacagaactttgt	CL43
bta-miR-148a	ENSBTAT00000079664	ENSBTAG00000050011	170	192	-14.65	tGTCACGTCACGCTCTAGGtgga	x|||||||x|x|x|||x|:xxxx	tCAGTGCACTAC-AGAACTttgt	-
bta-miR-148a	ENSBTAT00000079692	ENSBTAG00000002917	260	281	-16.91	tGTCACGTGAaattactgtatg	x|||||||||xxxxxxxxxxxx	tCAGTGCACTacagaactttgt	PRKAG2
bta-miR-148a	ENSBTAT00000079699	ENSBTAG00000014319	56	78	-12.39	tGTCACGTTTACTTTCCGAAAat	x|||||||xxxx|:|xx||||xx	tCAGTGCACTACAGAA-CTTTgt	DNM3
bta-miR-148a	ENSBTAT00000079713	ENSBTAG00000008218	835	858	-16.07	cGTCACGTAGGACGACcggtcggt	x|||||||xx||x|x|xxxxxxxx	tCAGTGCA--CTACAGaactttgt	NPTN
bta-miR-148a	ENSBTAT00000079763	ENSBTAG00000011022	175	196	-20.74	aGTCACGTGACAATTTGAttag	x|||||||||xxx:||||xxxx	tCAGTGCACTACAGAACTttgt	ARPP19
bta-miR-148a	ENSBTAT00000079781	ENSBTAG00000014933	41	62	-12.9	tGTCACGTttagaaaggaagta	x|||||||xxxxxxxxxxxxxx	tCAGTGCActacagaactttgt	TRAK2
bta-miR-148a	ENSBTAT00000079814	ENSBTAG00000006902	3972	3993	-11.87	cGTCACGTTACGACAAGAAAaa	x|||||||x|x|x|xx||||xx	tCAGTGCACTACAGAACTTTgt	KCNJ5
bta-miR-148a	ENSBTAT00000079816	ENSBTAG00000026716	818	838	-13.62	tGTCACGTT-TCCATTGATAtt	x|||||||xx|xxx||||x|xx	tCAGTGCACTACAGAACTTTgt	IBTK
bta-miR-148a	ENSBTAT00000079883	ENSBTAG00000001597	1256	1279	-20.99	gGTCACGTGTCCTGTCgcaccagg	x||||||||xxx||||xxxxxxxx	tCAGTGCACT--ACAGaactttgt	PITPNM2
bta-miR-148a	ENSBTAT00000079919	ENSBTAG00000054331	897	920	-16.91	cGTCACGTTCATGTAGTTGGGtgt	x|||||||xx||||xx|||::xxx	tCAGTGCAC-TACAG-AACTTtgt	COLEC10
bta-miR-148a	ENSBTAT00000079944	ENSBTAG00000000109	81	102	-13.89	gGTCACGTacacacccatccga	x|||||||xxxxxxxxxxxxxx	tCAGTGCActacagaactttgt	NPTXR
bta-miR-148a	ENSBTAT00000079963	ENSBTAG00000055014	747	769	-17.45	aGTCACGTGGAGAACTTTATAtg	x||||||||:x|xx|||x|x|xx	tCAGTGCACTACA-GAACTTTgt	SH3BGRL2
bta-miR-148a	ENSBTAT00000079979	ENSBTAG00000001739	760	783	-13.33	tGTCACGTTTTCTCCGTCGAAAag	x|||||||xx|x||xx|x||||xx	tCAGTGCACTACAG--AACTTTgt	CDH20
bta-miR-148a	ENSBTAT00000080009	ENSBTAG00000032588	1838	1860	-16.23	tGTCACGTAGTGGTTTTCGAtaa	x|||||||x:||x|:||x:|xxx	tCAGTGCACTAC-AGAACTTtgt	TMEM150C
bta-miR-148a	ENSBTAT00000080094	ENSBTAG00000048622	1664	1685	-16.69	tGTCACGTTTCAGTTAGAAAcc	x|||||||xxxxx:|x||||xx	tCAGTGCACTACAGAACTTTgt	TMOD3
bta-miR-148a	ENSBTAT00000080137	ENSBTAG00000046129	71	92	-15.07	aGTCACGTttacaggtccctaa	x|||||||xxxxxxxxxxxxxx	tCAGTGCActacagaactttgt	RAB34
bta-miR-148a	ENSBTAT00000080139	ENSBTAG00000011899	425	446	-18.55	aGTCACGTGTCGTTcccttttc	x||||||||xx||:xxxxxxxx	tCAGTGCACTACAGaactttgt	USP4
bta-miR-148a	ENSBTAT00000080146	ENSBTAG00000044074	165	187	-15.6	aGTCACGTTGTTTCGTTGTAGtt	x|||||||x:|x||x|||x|:xx	tCAGTGCACTACAG-AACTTTgt	MLLT10
bta-miR-148a	ENSBTAT00000080173	ENSBTAG00000012848	400	421	-17.18	gGTCACGTGcgagaggggtgca	x||||||||xxxxxxxxxxxxx	tCAGTGCACtacagaactttgt	PTPRU
bta-miR-148a	ENSBTAT00000080192	ENSBTAG00000017115	1465	1483	-14.3	cGTCACGTC---TCTCGAAGgt	x|||||||xxxx|||x|||:xx	tCAGTGCACTACAGAACTTTgt	TMEM41A
bta-miR-148a	ENSBTAT00000080210	ENSBTAG00000013452	671	693	-16.57	tGTCACGTCACTGTCaaagtaaa	x|||||||x|x||||xxxxxxxx	tCAGTGCACT-ACAGaactttgt	AQP9
bta-miR-148a	ENSBTAT00000080240	ENSBTAG00000020472	3786	3807	-18.23	gGTCACGTGcagcaagccagca	x||||||||xxxxxxxxxxxxx	tCAGTGCACtacagaactttgt	KDM5A
bta-miR-148a	ENSBTAT00000080264	ENSBTAG00000008438	297	318	-13.56	aGTCACGTTTAGACATAAtcca	x|||||||xxx|x|x|x|xxxx	tCAGTGCACTACAGAACTttgt	ARFIP1
bta-miR-148a	ENSBTAT00000080273	ENSBTAG00000015950	1026	1047	-20.1	aGTCACGTGtcggactcgccga	x||||||||xxxxxxxxxxxxx	tCAGTGCACtacagaactttgt	ISOC2
bta-miR-148a	ENSBTAT00000080284	ENSBTAG00000049163	2163	2184	-16.73	aGTCACGTaggaccggcgtcgg	x|||||||xxxxxxxxxxxxxx	tCAGTGCActacagaactttgt	TSPAN9
bta-miR-148a	ENSBTAT00000080394	ENSBTAG00000012564	263	284	-12.38	tGTCACGTctcctccacggtcc	x|||||||xxxxxxxxxxxxxx	tCAGTGCActacagaactttgt	KANSL1
bta-miR-148a	ENSBTAT00000080489	ENSBTAG00000009995	1187	1205	-19.01	tGTCACGTTTTGT---GAAAcg	x|||||||xx|||xxx||||xx	tCAGTGCACTACAGAACTTTgt	CPEB4
bta-miR-148a	ENSBTAT00000080493	ENSBTAG00000048903	1014	1035	-16.04	tGTCACGTCTTGTTATCACAga	x|||||||xx|||:x|x|x|xx	tCAGTGCACTACAGAACTTTgt	PRNP
bta-miR-148a	ENSBTAT00000080503	ENSBTAG00000019394	1039	1061	-12.9	cGTCACGTAGTTATCTTtttcaa	x|||||||x|x|x||||xxxxxx	tCAGTGCA-CTACAGAActttgt	ANO5
bta-miR-148a	ENSBTAT00000080533	ENSBTAG00000011494	61	81	-11.89	cGTCACGTTCT-TCTacctagc	x|||||||xx|x|||xxxxxxx	tCAGTGCACTACAGAactttgt	PYGL
bta-miR-148a	ENSBTAT00000080554	ENSBTAG00000002982	1068	1089	-16.55	aGTCACGTTTCGTTGTAGAGgt	x|||||||xxx||:x|x:|:xx	tCAGTGCACTACAGAACTTTgt	PITPNM3
bta-miR-148a	ENSBTAT00000080556	ENSBTAG00000008438	297	318	-13.56	aGTCACGTTTAGACATAAtcca	x|||||||xxx|x|x|x|xxxx	tCAGTGCACTACAGAACTttgt	ARFIP1
bta-miR-148a	ENSBTAT00000080652	ENSBTAG00000013961	2607	2628	-15.99	tGTCACGTCGTGACTcccggct	x|||||||x:||x||xxxxxxx	tCAGTGCACTACAGAactttgt	MYSM1
bta-miR-148a	ENSBTAT00000080737	ENSBTAG00000000603	2342	2364	-12.05	tGTCACGTTTTCATATTTAAGaa	x|||||||xx|xx|x||x||:xx	tCAGTGCACTAC-AGAACTTTgt	JAM2
bta-miR-148a	ENSBTAT00000080751	ENSBTAG00000003038	308	329	-14.21	tGTCACGTATTAAAATGAAAag	x|||||||xx|xxxx|||||xx	tCAGTGCACTACAGAACTTTgt	TAP2
bta-miR-148a	ENSBTAT00000080755	ENSBTAG00000055014	747	769	-17.45	aGTCACGTGGAGAACTTTATAtg	x||||||||:x|xx|||x|x|xx	tCAGTGCACTACA-GAACTTTgt	SH3BGRL2
bta-miR-148a	ENSBTAT00000080765	ENSBTAG00000021097	1041	1062	-12.36	cGTCACGTCCCGTgcgtcaccc	x|||||||xxx||xxxxxxxxx	tCAGTGCACTACAgaactttgt	PELI3
bta-miR-148a	ENSBTAT00000080797	ENSBTAG00000017976	724	747	-18.97	cGTCACGTGCAGTGTCCTctcgtc	x||||||||xx:||||x|xxxxxx	tCAGTGCAC--TACAGAActttgt	ABL1
bta-miR-148a	ENSBTAT00000080802	ENSBTAG00000012605	571	592	-14.1	gGTCACGTCTTCCTGTGccgca	x|||||||xx|xx:x||xxxxx	tCAGTGCACTACAGAACtttgt	GPR157
bta-miR-148a	ENSBTAT00000080834	ENSBTAG00000016950	274	294	-17.96	gGTCACGT-ACGGGTCGGGGtt	x|||||||x|x|xx|x|:::xx	tCAGTGCACTACAGAACTTTgt	B3GAT3
bta-miR-148a	ENSBTAT00000080866	ENSBTAG00000009175	722	742	-16.33	cGTCACGTGTTG-CTactgtgc	x||||||||x||x||xxxxxxx	tCAGTGCACTACAGAactttgt	RPS6KB2
bta-miR-148a	ENSBTAT00000080887	ENSBTAG00000017627	760	780	-20.9	aGTCACGTGA-GTTATGttgta	x|||||||||x||:x||xxxxx	tCAGTGCACTACAGAACtttgt	STMN4
bta-miR-148a	ENSBTAT00000080932	ENSBTAG00000016456	3168	3189	-20.77	tGTCACGTCGTGCCTTGAccag	x|||||||x:||x|||||xxxx	tCAGTGCACTACAGAACTttgt	CDC42BPB
bta-miR-148a	ENSBTAT00000080978	ENSBTAG00000004135	1513	1535	-18.56	tGTCACGTTAATGTCTTtcgtta	x|||||||x|x||||||xxxxxx	tCAGTGCACT-ACAGAActttgt	LMTK2
bta-miR-148a	ENSBTAT00000081028	ENSBTAG00000054046	130	150	-19.24	gGTCACGTGC-GTCcctggtca	x||||||||xx|||xxxxxxxx	tCAGTGCACTACAGaactttgt	-
bta-miR-148a	ENSBTAT00000081031	ENSBTAG00000012447	50	74	-15.6	tGTCACGTGTGAATTTCTaatactt	x||||||||xxx||x|||xxxxxxx	tCAGTGCAC---TACAGAactttgt	PPP1CB
bta-miR-148a	ENSBTAT00000081032	ENSBTAG00000001942	340	361	-12.05	tGTCACGTttacctacctcaag	x|||||||xxxxxxxxxxxxxx	tCAGTGCActacagaactttgt	SNX27
bta-miR-148a	ENSBTAT00000081151	ENSBTAG00000002739	615	636	-12.99	tGTCACGTAAAGAATTtttgtt	x|||||||x|x|xx||xxxxxx	tCAGTGCACTACAGAActttgt	PDE1C
bta-miR-148a	ENSBTAT00000081159	ENSBTAG00000011656	570	591	-14.87	gGTCACGTAAaaggtaggtctc	x|||||||x|xxxxxxxxxxxx	tCAGTGCACTacagaactttgt	PRPF6
bta-miR-148a	ENSBTAT00000081163	ENSBTAG00000008950	726	747	-14.23	aGTCACGTATTCTTTTcgtagt	x|||||||xx|x|:||xxxxxx	tCAGTGCACTACAGAActttgt	TRMT9B
bta-miR-148a	ENSBTAT00000081176	ENSBTAG00000017797	10	34	-17.76	aGTCACGTTTAATCGTTTGGAGAtc	x|||||||xxx||x||:|x||:|xx	tCAGTGCAC--TA-CAGAACTTTgt	LY75
bta-miR-148a	ENSBTAT00000081220	ENSBTAG00000001707	860	880	-15.23	tGTCACGTAAT-TTTCGGAcac	x|||||||x||x|:|x|:|xxx	tCAGTGCACTACAGAACTTtgt	UIMC1
bta-miR-148a	ENSBTAT00000081227	ENSBTAG00000013368	294	313	-12.2	cGTCACGT--TGACTTttctct	x|||||||xx||x|||xxxxxx	tCAGTGCACTACAGAActttgt	ANKRD22
bta-miR-148a	ENSBTAT00000081260	ENSBTAG00000003381	269	290	-11.41	cGTCACGTCACCACTcccccgc	x|||||||x|xxx||xxxxxxx	tCAGTGCACTACAGAactttgt	TENT4A
bta-miR-148a	ENSBTAT00000081265	ENSBTAG00000009881	129	149	-21.02	gGTCACGTGG-GTCcccgacca	x||||||||:x|||xxxxxxxx	tCAGTGCACTACAGaactttgt	ENTPD6
bta-miR-148a	ENSBTAT00000081308	ENSBTAG00000043989	3382	3402	-17.63	aGTCACGTAATC-CTTGAtcgg	x|||||||x||xx|||||xxxx	tCAGTGCACTACAGAACTttgt	EYA3
bta-miR-148a	ENSBTAT00000081313	ENSBTAG00000050919	206	226	-15.2	tGTCACGTCG-GTCCTCAGGtc	x|||||||x:x|||x|x|::xx	tCAGTGCACTACAGAACTTTgt	-
bta-miR-148a	ENSBTAT00000081387	ENSBTAG00000005034	94	115	-13.56	aGTCACGTttccacccttttcc	x|||||||xxxxxxxxxxxxxx	tCAGTGCActacagaactttgt	CAPN5
bta-miR-148a	ENSBTAT00000081423	ENSBTAG00000017037	181	203	-20.44	gGTCACGTAGAGGGGTAGTGAgg	x|||||||x||x|xx|x|x:|xx	tCAGTGCA-CTACAGAACTTTgt	PKN1
bta-miR-148a	ENSBTAT00000081434	ENSBTAG00000011767	437	460	-23.24	gGTCACGTGTCGTGTCAAGGGGga	x||||||||xx:||||xx|:::xx	tCAGTGCAC--TACAGAACTTTgt	MPP5
bta-miR-148a	ENSBTAT00000081457	ENSBTAG00000012015	864	886	-19.06	tGTCACGTCTTCGTCTTGtttgt	x|||||||xx|x||||||xxxxx	tCAGTGCACTA-CAGAACtttgt	FSIP1
bta-miR-148a	ENSBTAT00000081480	ENSBTAG00000016290	728	750	-12.02	tGTCACGTCAATTTCacatcttt	x|||||||x|x|x||xxxxxxxx	tCAGTGCACT-ACAGaactttgt	MOB1B
bta-miR-148a	ENSBTAT00000081484	ENSBTAG00000001657	1150	1171	-12.02	tGTCACGTCAAATTAAGAAGta	x|||||||x|xx|:xx|||:xx	tCAGTGCACTACAGAACTTTgt	PICALM
bta-miR-148a	ENSBTAT00000081491	ENSBTAG00000053458	165	187	-25.04	aGTCACGTGACTCCTCTGAGAct	x|||||||||xxx||x|||:|xx	tCAGTGCACTACAGA-ACTTTgt	-
bta-miR-148a	ENSBTAT00000081528	ENSBTAG00000018382	195	216	-16.98	aGTCACGTAAA-TCGTCGGAAgt	x|||||||x|xx||x|x|:||xx	tCAGTGCACTACAGAA-CTTTgt	SMS
bta-miR-148a	ENSBTAT00000081539	ENSBTAG00000014255	62	82	-14.49	cGTCACGTACT-TTTTGAccga	x|||||||xx|x|:||||xxxx	tCAGTGCACTACAGAACTttgt	VPS50
bta-miR-148a	ENSBTAT00000081579	ENSBTAG00000001632	257	278	-22.3	aGTCACGTGATTTTGTctcttt	x||||||||||x|:x|xxxxxx	tCAGTGCACTACAGAActttgt	NBR1
bta-miR-148a	ENSBTAT00000081594	ENSBTAG00000015571	89	110	-14.46	gGTCACGTcgcgcggtactggg	x|||||||xxxxxxxxxxxxxx	tCAGTGCActacagaactttgt	GCLC
bta-miR-148a	ENSBTAT00000081607	ENSBTAG00000015988	499	519	-18.29	aGTCACGT-ATATTTTGtcaca	x|||||||x||x|:|||xxxxx	tCAGTGCACTACAGAACtttgt	MYH11
bta-miR-148a	ENSBTAT00000081626	ENSBTAG00000012172	248	269	-13.53	aGTCACGTccagccctcttcct	x|||||||xxxxxxxxxxxxxx	tCAGTGCActacagaactttgt	MIDN
bta-miR-148a	ENSBTAT00000081630	ENSBTAG00000043989	3382	3402	-17.63	aGTCACGTAATC-CTTGAtcgg	x|||||||x||xx|||||xxxx	tCAGTGCACTACAGAACTttgt	EYA3
bta-miR-148a	ENSBTAT00000081725	ENSBTAG00000003455	19	40	-20.93	cGTCACGTGGTccgaagggaca	x||||||||:|xxxxxxxxxxx	tCAGTGCACTAcagaactttgt	ANKRD6
bta-miR-148a	ENSBTAT00000081755	ENSBTAG00000049953	135	156	-17.43	tGTCACGTCGTagggggctgta	x|||||||x:|xxxxxxxxxxx	tCAGTGCACTAcagaactttgt	-
bta-miR-148a	ENSBTAT00000081800	ENSBTAG00000015188	1609	1631	-17.25	tGTCACGTAATTGTCgatctttt	x|||||||x||x|||xxxxxxxx	tCAGTGCACTA-CAGaactttgt	KLF6
bta-miR-148a	ENSBTAT00000081801	ENSBTAG00000048041	1018	1039	-13	tGTCACGTT-TCTTTGTGTActt	x|||||||xx|x|:|x||x|xxx	tCAGTGCACTACAGA-ACTTtgt	ACTR1B
bta-miR-148a	ENSBTAT00000081817	ENSBTAG00000005161	602	623	-21.13	gGTCACGTGGcccacacggccg	x||||||||:xxxxxxxxxxxx	tCAGTGCACTacagaactttgt	ATP8B2
bta-miR-148a	ENSBTAT00000081854	ENSBTAG00000017060	122	143	-12.11	cGTCACGTAAaaaccaattgcc	x|||||||x|xxxxxxxxxxxx	tCAGTGCACTacagaactttgt	ITGB2
bta-miR-148a	ENSBTAT00000081866	ENSBTAG00000005916	474	498	-17.48	cGTCACGTAGGAATTCCTTGGtctg	x|||||||x|xx||xx||||:xxxx	tCAGTGCA-C--TACAGAACTttgt	ADNP2
bta-miR-148a	ENSBTAT00000081874	ENSBTAG00000016572	14	36	-16.89	cGTCACGTG-TGACGGTTGGGtcc	x||||||||x||x|xx|||::xxx	tCAGTGCACTACAG--AACTTtgt	USP37
bta-miR-148a	ENSBTAT00000082032	ENSBTAG00000013116	377	398	-13.89	gGTCACGTacacgaacgataat	x|||||||xxxxxxxxxxxxxx	tCAGTGCActacagaactttgt	PLCB4
bta-miR-148a	ENSBTAT00000082079	ENSBTAG00000047707	865	886	-15.96	tGTCACGTCGGT-TTTTGtttgt	x|||||||x|:|x|:|||xxxxx	tCAGTGCA-CTACAGAACtttgt	BOLA-DOB
bta-miR-148a	ENSBTAT00000082120	ENSBTAG00000004328	935	956	-16.52	tGTCACGTGActagaccgctac	x|||||||||xxxxxxxxxxxx	tCAGTGCACTacagaactttgt	CHST10
bta-miR-148a	ENSBTAT00000082135	ENSBTAG00000049163	722	743	-16.73	aGTCACGTaggaccggcgtcgg	x|||||||xxxxxxxxxxxxxx	tCAGTGCActacagaactttgt	TSPAN9
bta-miR-148a	ENSBTAT00000082144	ENSBTAG00000014123	3914	3935	-13.82	gGTCACGTCActcagttacgtg	x|||||||x|xxxxxxxxxxxx	tCAGTGCACTacagaactttgt	ZNF507
bta-miR-148a	ENSBTAT00000082295	ENSBTAG00000051982	778	799	-17.52	cGTCACGTtttcgacggtgtct	x|||||||xxxxxxxxxxxxxx	tCAGTGCActacagaactttgt	-
bta-miR-148a	ENSBTAT00000082313	ENSBTAG00000049163	722	743	-16.73	aGTCACGTaggaccggcgtcgg	x|||||||xxxxxxxxxxxxxx	tCAGTGCActacagaactttgt	TSPAN9
bta-miR-148a	ENSBTAT00000082319	ENSBTAG00000012135	765	786	-12.05	tGTCACGTTCTAAATTAAttga	x|||||||xx|xxx||x|xxxx	tCAGTGCACTACAGAACTttgt	LARP1B
bta-miR-148a	ENSBTAT00000082322	ENSBTAG00000007850	205	225	-13.53	aGTCACGTCCCG-CTTCAGtaa	x|||||||xxx|x|||x|:xxx	tCAGTGCACTACAGAACTTtgt	ITIH4
bta-miR-148a	ENSBTAT00000082332	ENSBTAG00000048059	908	929	-14.89	gGTCACGTCGTccccgttcctc	x|||||||x:|xxxxxxxxxxx	tCAGTGCACTAcagaactttgt	TMEM86A
bta-miR-148a	ENSBTAT00000082339	ENSBTAG00000017627	853	873	-20.9	aGTCACGTGA-GTTATGttgta	x|||||||||x||:x||xxxxx	tCAGTGCACTACAGAACtttgt	STMN4
bta-miR-148a	ENSBTAT00000082340	ENSBTAG00000003455	19	40	-20.93	cGTCACGTGGTccgaagggaca	x||||||||:|xxxxxxxxxxx	tCAGTGCACTAcagaactttgt	ANKRD6
bta-miR-148a	ENSBTAT00000082364	ENSBTAG00000049058	1419	1439	-14.42	aGTCACGTT-TGTaattttcgt	x|||||||xx|||xxxxxxxxx	tCAGTGCACTACAgaactttgt	INHBB
bta-miR-148a	ENSBTAT00000082505	ENSBTAG00000034693	1543	1564	-11.41	cGTCACGTCATcctcccttacc	x|||||||x||xxxxxxxxxxx	tCAGTGCACTAcagaactttgt	SYT1
bta-miR-148a	ENSBTAT00000082602	ENSBTAG00000020657	138	160	-18.04	aGTCACGTCGGTacgggcccccg	x|||||||x|:|xxxxxxxxxxx	tCAGTGCA-CTAcagaactttgt	FAT1
bta-miR-148a	ENSBTAT00000082617	ENSBTAG00000003455	19	40	-20.93	cGTCACGTGGTccgaagggaca	x||||||||:|xxxxxxxxxxx	tCAGTGCACTAcagaactttgt	ANKRD6
bta-miR-148a	ENSBTAT00000082745	ENSBTAG00000010626	463	484	-15.36	cGTCACGTAGGGTCcccctgcc	x|||||||x:x|||xxxxxxxx	tCAGTGCACTACAGaactttgt	SH3GLB2
bta-miR-148a	ENSBTAT00000082759	ENSBTAG00000005111	636	657	-15.19	gGTCACGTctttggacccgact	x|||||||xxxxxxxxxxxxxx	tCAGTGCActacagaactttgt	BMP2
bta-miR-148a	ENSBTAT00000082787	ENSBTAG00000054302	499	524	-13.5	cGTCACGTTTATCGTTTCGTGCAAgg	x|||||||xx||x||:|xx||x||xx	tCAGTGCAC-TA-CAGA--ACTTTgt	TCF23
bta-miR-148a	ENSBTAT00000082861	ENSBTAG00000001744	1852	1871	-13.76	cGTCACGTC-T-TCTGGAccca	x|||||||xx|x|||x||xxxx	tCAGTGCACTACAGAACTttgt	BET1L
bta-miR-148a	ENSBTAT00000082875	ENSBTAG00000004802	1015	1038	-19.1	aGTCACGTCTGCGGTCcgccccgc	x|||||||xx|xx|||xxxxxxxx	tCAGTGCA--CTACAGaactttgt	CEP170B
bta-miR-148a	ENSBTAT00000082894	ENSBTAG00000030335	1275	1300	-23.4	tGTCACGTCTTGATCGTCTTGGtcct	x|||||||xxx|||x||||||:xxxx	tCAGTGCA---CTA-CAGAACTttgt	ALDH4A1
bta-miR-148a	ENSBTAT00000082897	ENSBTAG00000011532	1416	1439	-26.01	gGTCACGTGGGTGTCTGTGtgcga	x||||||||:x|||||x||xxxxx	tCAGTGCACT-ACAGA-ACtttgt	MLLT6
bta-miR-148a	ENSBTAT00000082912	ENSBTAG00000012029	913	938	-18.47	tGTCACGTATCGTATACCTTGAGAtt	x|||||||xxx|x||xx|||||:|xx	tCAGTGCA---C-TACAGAACTTTgt	KLRB1
bta-miR-148a	ENSBTAT00000082914	ENSBTAG00000031439	638	660	-17.87	cGTCACGTCGTCGTCGCGGCAga	x|||||||x:|x|||xx|:x|xx	tCAGTGCACTA-CAGAACTTTgt	CDC14A
bta-miR-148a	ENSBTAT00000082916	ENSBTAG00000014665	237	260	-17.93	gGTCACGTCCTGAATCTTGTAAgg	x|||||||xx||xx|||||x||xx	tCAGTGCACTAC--AGAACTTTgt	ADAMTS2
bta-miR-148a	ENSBTAT00000083028	ENSBTAG00000049519	1010	1031	-16.12	aGTCACGTCATGgactatgtgt	x|||||||x|||xxxxxxxxxx	tCAGTGCACTACagaactttgt	MOGAT2
bta-miR-148a	ENSBTAT00000083038	ENSBTAG00000005830	297	318	-20.99	gGTCACGTGGGGgaagtgggag	x||||||||:x|xxxxxxxxxx	tCAGTGCACTACagaactttgt	STRN4
bta-miR-148a	ENSBTAT00000083041	ENSBTAG00000037819	2359	2383	-18.07	gGTCACGTTTTGTGACCCTGACAaa	x|||||||xx|||xxx|x|||x|xx	tCAGTGCACTACA---GAACTTTgt	SFT2D2
bta-miR-148a	ENSBTAT00000083042	ENSBTAG00000032588	1838	1860	-16.23	tGTCACGTAGTGGTTTTCGAtaa	x|||||||x:||x|:||x:|xxx	tCAGTGCACTAC-AGAACTTtgt	TMEM150C
bta-miR-148a	ENSBTAT00000083077	ENSBTAG00000010401	439	460	-11.44	cGTCACGTtcatcctagtcctt	x|||||||xxxxxxxxxxxxxx	tCAGTGCActacagaactttgt	UBE4B
bta-miR-148a	ENSBTAT00000083088	ENSBTAG00000012505	898	919	-16.72	gGTCACGTACTCTGTgtccccg	x|||||||xx|x|x|xxxxxxx	tCAGTGCACTACAGAactttgt	ARHGEF17
bta-miR-148a	ENSBTAT00000083145	ENSBTAG00000014605	1629	1650	-14.85	tGTCACGTC-TGTGCATGGGccc	x|||||||xx|||x|x||::xxx	tCAGTGCACTACA-GAACTTtgt	ETV6
bta-miR-148a	ENSBTAT00000083172	ENSBTAG00000043989	3382	3402	-17.63	aGTCACGTAATC-CTTGAtcgg	x|||||||x||xx|||||xxxx	tCAGTGCACTACAGAACTttgt	EYA3
bta-miR-148a	ENSBTAT00000083178	ENSBTAG00000013152	1774	1795	-11.55	cGTCACGTCAAGgaagacggga	x|||||||x|x|xxxxxxxxxx	tCAGTGCACTACagaactttgt	NIPSNAP1
bta-miR-148a	ENSBTAT00000083193	ENSBTAG00000015335	27	49	-18.46	aGTCACGTTTATGTaaaacagag	x|||||||xx||||xxxxxxxxx	tCAGTGCAC-TACAgaactttgt	ADGRB3
bta-miR-148a	ENSBTAT00000083212	ENSBTAG00000001657	1125	1146	-12.02	tGTCACGTCAAATTAAGAAGta	x|||||||x|xx|:xx|||:xx	tCAGTGCACTACAGAACTTTgt	PICALM
bta-miR-148a	ENSBTAT00000083220	ENSBTAG00000020751	524	546	-19.87	gGTCACGTGGGTGgaccaggaga	x||||||||:x||xxxxxxxxxx	tCAGTGCACT-ACagaactttgt	HSF1
bta-miR-148a	ENSBTAT00000083229	ENSBTAG00000048365	1995	2016	-15.84	tGTCACGTGcactgaaccaccg	x||||||||xxxxxxxxxxxxx	tCAGTGCACtacagaactttgt	WNT7B
bta-miR-148a	ENSBTAT00000083246	ENSBTAG00000009020	2270	2291	-17.64	cGTCACGTGAGGTTcacggtat	x|||||||||x||:xxxxxxxx	tCAGTGCACTACAGaactttgt	CRIM1
bta-miR-148a	ENSBTAT00000083257	ENSBTAG00000048843	508	528	-13.2	tGTCACGT-ATCTTaggtttat	x|||||||x||x|:xxxxxxxx	tCAGTGCACTACAGaactttgt	UBE2W
bta-miR-148a	ENSBTAT00000083274	ENSBTAG00000012467	183	205	-17.4	cGTCACGTCCAGTTCTTGActtt	x|||||||xxx||x|||||xxxx	tCAGTGCACTACA-GAACTttgt	MASP1
bta-miR-148a	ENSBTAT00000083369	ENSBTAG00000018770	1166	1190	-16.45	aGTCACGTTTGGGTATCTcaccacc	x|||||||xxx|:|x|||xxxxxxx	tCAGTGCA---CTACAGAactttgt	HSDL1
bta-miR-148a	ENSBTAT00000083430	ENSBTAG00000010357	723	743	-16.73	gGTCACGTAAT-TCGTGTGAct	x|||||||x||x||x||x:|xx	tCAGTGCACTACAGAACTTTgt	ST6GAL1
bta-miR-148a	ENSBTAT00000083450	ENSBTAG00000002993	96	117	-13.53	aGTCACGTCAacaagacctcac	x|||||||x|xxxxxxxxxxxx	tCAGTGCACTacagaactttgt	SFT2D1
bta-miR-148a	ENSBTAT00000083533	ENSBTAG00000020282	390	411	-13.53	aGTCACGTcccacagacgagta	x|||||||xxxxxxxxxxxxxx	tCAGTGCActacagaactttgt	DCTD
bta-miR-148a	ENSBTAT00000083545	ENSBTAG00000018225	516	537	-17.03	gGTCACGTGGCTCCTacccctc	x||||||||:xxx||xxxxxxx	tCAGTGCACTACAGAactttgt	SIPA1L3
bta-miR-148a	ENSBTAT00000083579	ENSBTAG00000017024	1087	1109	-13.24	tGTCACGT-ATCGACATTGttttt	x|||||||x||x|x|x|||xxxxx	tCAGTGCACTA-CAG-AACtttgt	PPARGC1A
bta-miR-148a	ENSBTAT00000083600	ENSBTAG00000016571	279	300	-13.47	tGTCACGTCTCTTCTgctccga	x|||||||xxxx|||xxxxxxx	tCAGTGCACTACAGAactttgt	FAM234A
bta-miR-148a	ENSBTAT00000083604	ENSBTAG00000004344	349	367	-17.72	gGTCACGTGC---CCTGAGAaa	x||||||||xxxx|x|||:|xx	tCAGTGCACTACAGAACTTTgt	ACSL1
bta-miR-148a	ENSBTAT00000083641	ENSBTAG00000000140	777	798	-14.93	gGTCACGTaccccgaggtagac	x|||||||xxxxxxxxxxxxxx	tCAGTGCActacagaactttgt	EPHX1
bta-miR-148a	ENSBTAT00000083644	ENSBTAG00000050233	1265	1285	-15.66	aGTCACGT-ACATATTGACAac	x|||||||x|xx|x||||x|xx	tCAGTGCACTACAGAACTTTgt	PRRG1
bta-miR-148a	ENSBTAT00000083647	ENSBTAG00000055286	1097	1120	-16.16	gGTCACGTTAACTGTATTTAAcaa	x|||||||x|xx|||x||x||xxx	tCAGTGCACT--ACAGAACTTtgt	MACIR
bta-miR-148a	ENSBTAT00000083648	ENSBTAG00000017955	1654	1676	-16.05	aGTCACGTTGAGGTTcccccagc	x|||||||x||x||:xxxxxxxx	tCAGTGCA-CTACAGaactttgt	KCNIP3
bta-miR-148a	ENSBTAT00000083692	ENSBTAG00000051600	1030	1051	-14.15	tGTCACGTCTTAAGTCAAAAga	x|||||||xx|xxx|xx|||xx	tCAGTGCACTACAGAACTTTgt	-
bta-miR-148a	ENSBTAT00000083725	ENSBTAG00000020225	174	198	-16.72	tGTCACGTTCATACGTCGTGTGAac	x|||||||xx||xx|||x||x:|xx	tCAGTGCAC-TA--CAGAACTTTgt	TBXAS1
bta-miR-148a	ENSBTAT00000083733	ENSBTAG00000052305	182	203	-21.13	gGTCACGTGGTcggggttcgta	x||||||||:|xxxxxxxxxxx	tCAGTGCACTAcagaactttgt	-
bta-miR-148a	ENSBTAT00000083751	ENSBTAG00000016456	3168	3189	-20.77	tGTCACGTCGTGCCTTGAccag	x|||||||x:||x|||||xxxx	tCAGTGCACTACAGAACTttgt	CDC42BPB
bta-miR-148a	ENSBTAT00000083850	ENSBTAG00000015764	271	292	-16.62	aGTCACGTGtacaaaaataaag	x||||||||xxxxxxxxxxxxx	tCAGTGCACtacagaactttgt	EML2
bta-miR-148a	ENSBTAT00000083875	ENSBTAG00000039819	2080	2101	-16.44	cGTCACGTGTAACCTTccgggg	x||||||||xxxx|||xxxxxx	tCAGTGCACTACAGAActttgt	RPH3AL
bta-miR-148a	ENSBTAT00000083884	ENSBTAG00000012239	635	656	-14.92	cGTCACGTCTTCTGTgtccaag	x|||||||xx|x|x|xxxxxxx	tCAGTGCACTACAGAactttgt	SLC37A3
bta-miR-148a	ENSBTAT00000083910	ENSBTAG00000012564	263	284	-12.38	tGTCACGTctcctccacggtcc	x|||||||xxxxxxxxxxxxxx	tCAGTGCActacagaactttgt	KANSL1
bta-miR-148a	ENSBTAT00000083934	ENSBTAG00000024643	637	657	-19.54	aGTCACGTGTCG-CTTCAGAac	x||||||||xx|x|||x|:|xx	tCAGTGCACTACAGAACTTTgt	VEPH1
bta-miR-148a	ENSBTAT00000084031	ENSBTAG00000008218	344	365	-19.32	cGTCACGTAAAATCTCGAAAcg	x|||||||x|xx|||x||||xx	tCAGTGCACTACAGAACTTTgt	NPTN
bta-miR-148a	ENSBTAT00000084033	ENSBTAG00000050912	182	203	-21.13	gGTCACGTGGTcggggttcgta	x||||||||:|xxxxxxxxxxx	tCAGTGCACTAcagaactttgt	-
bta-miR-148a	ENSBTAT00000084040	ENSBTAG00000016836	2347	2368	-12.2	tGTCACGTTCTTTCACTAAttc	x|||||||xx|x||xxx||xxx	tCAGTGCACTACAGAACTTtgt	PDK1
bta-miR-148a	ENSBTAT00000084053	ENSBTAG00000002394	145	166	-18.07	tGTCACGTGAacgaccagtctt	x|||||||||xxxxxxxxxxxx	tCAGTGCACTacagaactttgt	TMEM44
bta-miR-148a	ENSBTAT00000084204	ENSBTAG00000003424	377	398	-13.56	aGTCACGTTATAAGTAAAAAtt	x|||||||x||xxx|xx|||xx	tCAGTGCACTACAGAACTTTgt	BET1
bta-miR-148a	ENSBTAT00000084236	ENSBTAG00000049864	588	609	-17.33	aGTCACGTcccagtccgggtcg	x|||||||xxxxxxxxxxxxxx	tCAGTGCActacagaactttgt	PPP1R9B
bta-miR-148a	ENSBTAT00000084274	ENSBTAG00000017075	792	813	-13.76	gGTCACGTctccgggctgatcc	x|||||||xxxxxxxxxxxxxx	tCAGTGCActacagaactttgt	STX1A
bta-miR-148a	ENSBTAT00000084288	ENSBTAG00000020079	383	406	-22.89	aGTCACGTGAGCCGTCTgtcctct	x|||||||||xxx||||xxxxxxx	tCAGTGCACTA--CAGAactttgt	MAP3K4
bta-miR-148a	ENSBTAT00000084319	ENSBTAG00000003865	135	156	-15.27	cGTCACGTTGAT-TCaaggttcg	x|||||||x|||x||xxxxxxxx	tCAGTGCA-CTACAGaactttgt	CASR
bta-miR-148a	ENSBTAT00000084349	ENSBTAG00000053316	182	203	-20.35	gGTCACGTGATcggggttcgta	x||||||||||xxxxxxxxxxx	tCAGTGCACTAcagaactttgt	-
bta-miR-148a	ENSBTAT00000084361	ENSBTAG00000039819	2080	2101	-16.44	cGTCACGTGTAACCTTccgggg	x||||||||xxxx|||xxxxxx	tCAGTGCACTACAGAActttgt	RPH3AL
bta-miR-148a	ENSBTAT00000084364	ENSBTAG00000002128	259	280	-17.66	gGTCACGTACGGTCactagtgt	x|||||||xxx|||xxxxxxxx	tCAGTGCACTACAGaactttgt	MPPE1
bta-miR-148a	ENSBTAT00000084389	ENSBTAG00000015887	708	732	-14.62	tGTCACGTCTGAATCTTTTtgtcta	x|||||||xx||x|x|:||xxxxxx	tCAGTGCA--CT-ACAGAActttgt	FOXJ3
bta-miR-148a	ENSBTAT00000084478	ENSBTAG00000006940	172	190	-14.36	aGTCACGTTA-GAC--GAAAta	x|||||||x|x|x|xx||||xx	tCAGTGCACTACAGAACTTTgt	USP48
bta-miR-148a	ENSBTAT00000084558	ENSBTAG00000017976	724	747	-18.97	cGTCACGTGCAGTGTCCTctcgtc	x||||||||xx:||||x|xxxxxx	tCAGTGCAC--TACAGAActttgt	ABL1
bta-miR-148a	ENSBTAT00000084559	ENSBTAG00000013591	380	401	-12.05	tGTCACGTTACATTTTAAAtta	x|||||||x|xx|:||x||xxx	tCAGTGCACTACAGAACTTtgt	CYB5R4
bta-miR-148a	ENSBTAT00000084588	ENSBTAG00000020350	25	44	-17.41	cGTCACGTG--GTCGTGcgctg	x||||||||xx|||x||xxxxx	tCAGTGCACTACAGAACtttgt	DUSP2
bta-miR-148a	ENSBTAT00000084599	ENSBTAG00000018431	185	206	-13.89	gGTCACGTactcatacctcata	x|||||||xxxxxxxxxxxxxx	tCAGTGCActacagaactttgt	NAV2
bta-miR-148a	ENSBTAT00000084640	ENSBTAG00000020225	174	198	-16.72	tGTCACGTTCATACGTCGTGTGAac	x|||||||xx||xx|||x||x:|xx	tCAGTGCAC-TA--CAGAACTTTgt	TBXAS1
bta-miR-148a	ENSBTAT00000084642	ENSBTAG00000005034	94	115	-13.56	aGTCACGTttccacccttttcc	x|||||||xxxxxxxxxxxxxx	tCAGTGCActacagaactttgt	CAPN5
bta-miR-148a	ENSBTAT00000084674	ENSBTAG00000000585	373	396	-16.94	aGTCACGTTATCGGTCTccggttc	x|||||||x||xx||||xxxxxxx	tCAGTGCACTA--CAGAactttgt	LY6G6C
bta-miR-148a	ENSBTAT00000084724	ENSBTAG00000004729	98	119	-14.13	cGTCACGTCAcccgggacacgt	x|||||||x|xxxxxxxxxxxx	tCAGTGCACTacagaactttgt	PKMYT1
bta-miR-148a	ENSBTAT00000084766	ENSBTAG00000001707	860	880	-15.23	tGTCACGTAAT-TTTCGGAcac	x|||||||x||x|:|x|:|xxx	tCAGTGCACTACAGAACTTtgt	UIMC1
bta-miR-148a	ENSBTAT00000084807	ENSBTAG00000017024	1087	1109	-13.24	tGTCACGT-ATCGACATTGttttt	x|||||||x||x|x|x|||xxxxx	tCAGTGCACTA-CAG-AACtttgt	PPARGC1A
bta-miR-148a	ENSBTAT00000084836	ENSBTAG00000051936	916	937	-13.89	gGTCACGTAActtaccagaccc	x|||||||x|xxxxxxxxxxxx	tCAGTGCACTacagaactttgt	-
bta-miR-148a	ENSBTAT00000084993	ENSBTAG00000019770	1060	1081	-12.73	tGTCACGTTTCGTTaatagggg	x|||||||xxx||:xxxxxxxx	tCAGTGCACTACAGaactttgt	APOA4
bta-miR-148a	ENSBTAT00000085024	ENSBTAG00000004364	228	251	-22.22	cGTCACGTGGGGGTCGTTGTAGat	x||||||||:x|x||x|||x|:xx	tCAGTGCACTAC-AG-AACTTTgt	THNSL2
bta-miR-148a	ENSBTAT00000085066	ENSBTAG00000008025	811	832	-16.4	cGTCACGTttccgcgtcgcggt	x|||||||xxxxxxxxxxxxxx	tCAGTGCActacagaactttgt	UBE3C
bta-miR-148a	ENSBTAT00000085070	ENSBTAG00000011515	280	302	-16.04	aGTCACGTAAATGTaaggtatca	x|||||||x|x|||xxxxxxxxx	tCAGTGCACT-ACAgaactttgt	SELL
bta-miR-148a	ENSBTAT00000085097	ENSBTAG00000003242	2898	2919	-21.9	aGTCACGTGGgcccggggggtg	x||||||||:xxxxxxxxxxxx	tCAGTGCACTacagaactttgt	ACAD9
bta-miR-148a	ENSBTAT00000085103	ENSBTAG00000010786	640	662	-17.71	gGTCACGTACTCTTCGTGACAat	x|||||||xx|x|x|x|||x|xx	tCAGTGCACTACA-GAACTTTgt	TACC2
bta-miR-148a	ENSBTAT00000085115	ENSBTAG00000003185	1291	1312	-13.19	tGTCACGTTAAGTATCGtcgca	x|||||||x|x||x|x|xxxxx	tCAGTGCACTACAGAACtttgt	ASAP1
bta-miR-148a	ENSBTAT00000085181	ENSBTAG00000054756	781	802	-13.83	aGTCACGTtcgaacacacggta	x|||||||xxxxxxxxxxxxxx	tCAGTGCActacagaactttgt	CL43
bta-miR-148a	ENSBTAT00000085232	ENSBTAG00000053135	1451	1470	-14.91	cGTCACGTCCT--CTGGACAca	x|||||||xx|xx||x||x|xx	tCAGTGCACTACAGAACTTTgt	TMEM236
bta-miR-148a	ENSBTAT00000085240	ENSBTAG00000021301	436	458	-16.62	aGTCACGTGTATagacacttata	x||||||||x||xxxxxxxxxxx	tCAGTGCAC-TAcagaactttgt	ACSF2
bta-miR-148a	ENSBTAT00000085400	ENSBTAG00000002736	35	58	-20.53	aGTCACGTGCAACCCCTAGAGAcc	x||||||||xx|xxx||x||:|xx	tCAGTGCAC--TACAGAACTTTgt	DNMT1
bta-miR-148a	ENSBTAT00000085429	ENSBTAG00000011248	81	106	-20.2	tGTCACGTGCTACGTCGATAGAAcgg	x||||||||x|xx|||xx|x|||xxx	tCAGTGCACTA--CAG--AACTTtgt	MSANTD2
bta-miR-148a	ENSBTAT00000085592	ENSBTAG00000018576	2381	2403	-21.98	aGTCACGTTGGTCTCTGGGAAaa	x|||||||x|:|x|||x|:||xx	tCAGTGCA-CTACAGAACTTTgt	DPYSL5
bta-miR-148a	ENSBTAT00000085598	ENSBTAG00000000296	84	107	-14.67	cGTCACGTTCAGACTCCTGAcgag	x|||||||xxx|x||xx|||xxxx	tCAGTGCACTACAGA--ACTttgt	IMPDH1
bta-miR-148a	ENSBTAT00000085604	ENSBTAG00000021156	608	630	-13.91	cGTCACGTAGAacctcaggtctc	x|||||||x||xxxxxxxxxxxx	tCAGTGCA-CTacagaactttgt	TBC1D31
bta-miR-148a	ENSBTAT00000085644	ENSBTAG00000001252	377	398	-12.2	tGTCACGTTGTATATTAAAtta	x|||||||x:|x|x||x||xxx	tCAGTGCACTACAGAACTTtgt	HIVEP1
bta-miR-148a	ENSBTAT00000085646	ENSBTAG00000005058	767	788	-26.21	tGTCACGTCTTGTCTTGCGAct	x|||||||xx|||||||x:|xx	tCAGTGCACTACAGAACTTTgt	C18H16orf70
bta-miR-148a	ENSBTAT00000085650	ENSBTAG00000033702	760	781	-14.09	cGTCACGTaccggttgccgatg	x|||||||xxxxxxxxxxxxxx	tCAGTGCActacagaactttgt	STARD8
bta-miR-148a	ENSBTAT00000085730	ENSBTAG00000011910	89	111	-15.86	aGTCACGTCGATTTTCCGAtttt	x|||||||x|||x|:xx||xxxx	tCAGTGCA-CTACAGAACTttgt	STK33
bta-miR-148a	ENSBTAT00000085747	ENSBTAG00000007888	1236	1257	-15.94	tGTCACGTGGacacgacccggt	x||||||||:xxxxxxxxxxxx	tCAGTGCACTacagaactttgt	EFR3B
bta-miR-148a	ENSBTAT00000085752	ENSBTAG00000049203	947	967	-14.88	aGTCACGTC-TGACCCGGAAtc	x|||||||xx||x|xx|:||xx	tCAGTGCACTACAGAACTTTgt	FBXO17
bta-miR-148a	ENSBTAT00000085778	ENSBTAG00000031548	3	23	-15.95	cGTCACGTCTTC-CTCGGAAga	x|||||||xx|xx||x|:||xx	tCAGTGCACTACAGAACTTTgt	-
bta-miR-148a	ENSBTAT00000085783	ENSBTAG00000054481	2329	2352	-14.61	tGTCACGTCTGGTGACagttttca	x|||||||xx|:||x|xxxxxxxx	tCAGTGCA--CTACAGaactttgt	TMEM92
bta-miR-148a	ENSBTAT00000085786	ENSBTAG00000009995	1187	1205	-19.01	tGTCACGTTTTGT---GAAAcg	x|||||||xx|||xxx||||xx	tCAGTGCACTACAGAACTTTgt	CPEB4
bta-miR-148a	ENSBTAT00000085797	ENSBTAG00000006618	679	700	-21.89	tGTCACGTTTTTGTGTGAGAca	x|||||||xx|xx:x|||:|xx	tCAGTGCACTACAGAACTTTgt	HLF
bta-miR-148a	ENSBTAT00000085854	ENSBTAG00000001535	133	154	-13.71	aGTCACGTCAATAGTTTAAAtt	x|||||||x|xxxx||x|||xx	tCAGTGCACTACAGAACTTTgt	LIPH
bta-miR-148a	ENSBTAT00000085883	ENSBTAG00000039886	1089	1109	-13.45	gGTCACGTC-TATCTgcattct	x|||||||xx|x|||xxxxxxx	tCAGTGCACTACAGAactttgt	-
bta-miR-148a	ENSBTAT00000085956	ENSBTAG00000018061	251	272	-12.72	tGTCACGTacttaatgtgtatt	x|||||||xxxxxxxxxxxxxx	tCAGTGCActacagaactttgt	LNPK
bta-miR-148a	ENSBTAT00000085972	ENSBTAG00000019839	21	45	-16.15	tGTCACGTCTCATATGTCC-GAAtcc	x|||||||xxxxx|||||xx|||xxx	tCAGTGCAC----TACAGAACTTtgt	LTBP1
bta-miR-148a	ENSBTAT00000085980	ENSBTAG00000009655	558	581	-24.41	gGTCACGTGGTAAGTCTGGAccat	x||||||||:|xx||||x||xxxx	tCAGTGCACTA--CAGAACTttgt	TNS3
bta-miR-148a	ENSBTAT00000086045	ENSBTAG00000005830	297	318	-20.99	gGTCACGTGGGGgaagtgggag	x||||||||:x|xxxxxxxxxx	tCAGTGCACTACagaactttgt	STRN4
bta-miR-148a	ENSBTAT00000086099	ENSBTAG00000002917	260	281	-16.91	tGTCACGTGAaattactgtatg	x|||||||||xxxxxxxxxxxx	tCAGTGCACTacagaactttgt	PRKAG2
bta-miR-148a	ENSBTAT00000086121	ENSBTAG00000001632	257	278	-22.3	aGTCACGTGATTTTGTctcttt	x||||||||||x|:x|xxxxxx	tCAGTGCACTACAGAActttgt	NBR1
bta-miR-148a	ENSBTAT00000086126	ENSBTAG00000015251	15	34	-12.57	cGTCACGTTAT--TATGAAGta	x|||||||x||xx:x||||:xx	tCAGTGCACTACAGAACTTTgt	-
bta-miR-148a	ENSBTAT00000086154	ENSBTAG00000018770	1166	1190	-16.45	aGTCACGTTTGGGTATCTcaccacc	x|||||||xxx|:|x|||xxxxxxx	tCAGTGCA---CTACAGAactttgt	HSDL1
bta-miR-148a	ENSBTAT00000086175	ENSBTAG00000012653	670	691	-19.91	gGTCACGTGGAGggaccgggac	x||||||||:x|xxxxxxxxxx	tCAGTGCACTACagaactttgt	CAMK2B
bta-miR-148a	ENSBTAT00000086182	ENSBTAG00000007384	482	505	-16.62	aGTCACGTGTCATATATGCACAca	x||||||||xx||x|x|xx|x|xx	tCAGTGCAC--TACAGAACTTTgt	CYTH3
bta-miR-148a	ENSBTAT00000086233	ENSBTAG00000049013	323	345	-14.63	cGTCACGTCGAcacgtaaggtct	x|||||||x||xxxxxxxxxxxx	tCAGTGCA-CTacagaactttgt	-
bta-miR-148a	ENSBTAT00000086238	ENSBTAG00000048519	296	321	-21.73	gGTCACGTGTGTGTACTCTTGctcag	x||||||||x:|||xxx||||xxxxx	tCAGTGCAC-TACA---GAACtttgt	DCAF5
bta-miR-148a	ENSBTAT00000086261	ENSBTAG00000018225	1962	1983	-17.03	gGTCACGTGGCTCCTacccctc	x||||||||:xxx||xxxxxxx	tCAGTGCACTACAGAactttgt	SIPA1L3
bta-miR-148a	ENSBTAT00000086298	ENSBTAG00000016806	2494	2513	-16.67	tGTCACGTCCT--TTGGAGAcg	x|||||||xx|xx:|x||:|xx	tCAGTGCACTACAGAACTTTgt	PAFAH1B1
bta-miR-148a	ENSBTAT00000086379	ENSBTAG00000010786	848	868	-13.93	tGTCACGTC-TGTgaactctcc	x|||||||xx|||xxxxxxxxx	tCAGTGCACTACAgaactttgt	TACC2
bta-miR-148a	ENSBTAT00000086483	ENSBTAG00000017765	211	232	-15.04	aGTCACGTCCTCTCTattacac	x|||||||xx|x|||xxxxxxx	tCAGTGCACTACAGAactttgt	-
bta-miR-148a	ENSBTAT00000086504	ENSBTAG00000001252	377	398	-12.2	tGTCACGTTGTATATTAAAtta	x|||||||x:|x|x||x||xxx	tCAGTGCACTACAGAACTTtgt	HIVEP1
bta-miR-148a	ENSBTAT00000086543	ENSBTAG00000016571	279	300	-13.47	tGTCACGTCTCTTCTgctccga	x|||||||xxxx|||xxxxxxx	tCAGTGCACTACAGAactttgt	FAM234A
bta-miR-148a	ENSBTAT00000086559	ENSBTAG00000014514	882	904	-15.93	gGTCACGTCGAcacaagtctcct	x|||||||x||xxxxxxxxxxxx	tCAGTGCA-CTacagaactttgt	SEC1
bta-miR-148a	ENSBTAT00000086625	ENSBTAG00000014665	237	260	-17.93	gGTCACGTCCTGAATCTTGTAAgg	x|||||||xx||xx|||||x||xx	tCAGTGCACTAC--AGAACTTTgt	ADAMTS2
bta-miR-148a	ENSBTAT00000086667	ENSBTAG00000001961	2112	2134	-17.16	cGTCACGTTTTGTGTGTGAAtag	x|||||||xx|||x|x||||xxx	tCAGTGCACTACAGA-ACTTtgt	MAP1B
bta-miR-148a	ENSBTAT00000086694	ENSBTAG00000013476	725	745	-15.8	gGTCACGT-ACGAGACGAGAtc	x|||||||x|x|xxxx||:|xx	tCAGTGCACTACAGAACTTTgt	CPA5
bta-miR-148a	ENSBTAT00000086698	ENSBTAG00000034689	112	133	-17.36	aGTCACGTCCTCCCGCGGGAca	x|||||||xx|xx|xx|::|xx	tCAGTGCACTACAGAACTTTgt	ZNRF1
bta-miR-148a	ENSBTAT00000086736	ENSBTAG00000006760	133	157	-11.54	cGTCACGTCGTTACCCGTAGAAAac	x|||||||x:|xx|xxx|x||||xx	tCAGTGCACTACAG---AACTTTgt	OTX1
bta-miR-148a	ENSBTAT00000086815	ENSBTAG00000009655	558	581	-24.41	gGTCACGTGGTAAGTCTGGAccat	x||||||||:|xx||||x||xxxx	tCAGTGCACTA--CAGAACTttgt	TNS3
bta-miR-148a	ENSBTAT00000086866	ENSBTAG00000023745	909	929	-20.54	aGTCACGTGG-GTTAAGGAtta	x||||||||:x||:xx|:|xxx	tCAGTGCACTACAGAACTTtgt	BANP
bta-miR-148a	ENSBTAT00000086868	ENSBTAG00000054572	195	216	-15.94	cGTCACGTCCGGTCgagccacc	x|||||||xxx|||xxxxxxxx	tCAGTGCACTACAGaactttgt	PEG3
bta-miR-148a	ENSBTAT00000086907	ENSBTAG00000019770	1060	1081	-12.73	tGTCACGTTTCGTTaatagggg	x|||||||xxx||:xxxxxxxx	tCAGTGCACTACAGaactttgt	APOA4
bta-miR-148a	ENSBTAT00000086938	ENSBTAG00000007384	482	505	-16.62	aGTCACGTGTCATATATGCACAca	x||||||||xx||x|x|xx|x|xx	tCAGTGCAC--TACAGAACTTTgt	CYTH3
bta-miR-148a	ENSBTAT00000086953	ENSBTAG00000019839	21	45	-16.15	tGTCACGTCTCATATGTCC-GAAtcc	x|||||||xxxxx|||||xx|||xxx	tCAGTGCAC----TACAGAACTTtgt	LTBP1
bta-miR-148a	ENSBTAT00000086988	ENSBTAG00000000494	540	563	-20.27	aGTCACGTCGAGTGGCTTGGtgtg	x|||||||x||x||x||||:xxxx	tCAGTGCA-CT-ACAGAACTttgt	PDE4D
bta-miR-148a	ENSBTAT00000087087	ENSBTAG00000015188	3072	3094	-17.25	tGTCACGTAATTGTCgatctttt	x|||||||x||x|||xxxxxxxx	tCAGTGCACTA-CAGaactttgt	KLF6
bta-miR-148a	ENSBTAT00000087095	ENSBTAG00000004135	289	311	-18.56	tGTCACGTTAATGTCTTtcgtta	x|||||||x|x||||||xxxxxx	tCAGTGCACT-ACAGAActttgt	LMTK2
bta-miR-148a	ENSBTAT00000087097	ENSBTAG00000017999	369	392	-13.56	aGTCACGTTTCAATTTTCGAGtat	x|||||||xxx|xx|:|x||:xxx	tCAGTGCAC--TACAGAACTTtgt	TNRC6A
bta-miR-148a	ENSBTAT00000087293	ENSBTAG00000050459	2013	2034	-13.69	gGTCACGTCAgctaaattctga	x|||||||x|xxxxxxxxxxxx	tCAGTGCACTacagaactttgt	FAM222A
bta-miR-148a	ENSBTAT00000087330	ENSBTAG00000014319	116	138	-12.39	tGTCACGTTTACTTTCCGAAAat	x|||||||xxxx|:|xx||||xx	tCAGTGCACTACAGAA-CTTTgt	DNM3
bta-miR-148a	ENSBTAT00000087341	ENSBTAG00000021505	142	163	-14.9	tGTCACGTGcagcacaagtgga	x||||||||xxxxxxxxxxxxx	tCAGTGCACtacagaactttgt	USP36
bta-miR-148a	ENSBTAT00000087347	ENSBTAG00000010828	350	370	-14.34	aGTCACGTC-TCTTTccagcca	x|||||||xx|x|:|xxxxxxx	tCAGTGCACTACAGAactttgt	-
bta-miR-148a	ENSBTAT00000087427	ENSBTAG00000017765	211	232	-15.04	aGTCACGTCCTCTCTattacac	x|||||||xx|x|||xxxxxxx	tCAGTGCACTACAGAactttgt	-
bta-miR-148a	ENSBTAT00000087449	ENSBTAG00000004552	96	117	-13.53	aGTCACGTcccgacccactaga	x|||||||xxxxxxxxxxxxxx	tCAGTGCActacagaactttgt	PBXIP1
bta-miR-148a	ENSBTAT00000087470	ENSBTAG00000018603	351	372	-15.92	aGTCACGTAGCGTCcccaccct	x|||||||x:x|||xxxxxxxx	tCAGTGCACTACAGaactttgt	RGMA
bta-miR-148a	ENSBTAT00000087485	ENSBTAG00000011023	899	919	-22.04	aGTCACGTAAT-TGTCGAGAcc	x|||||||x||x|x|x||:|xx	tCAGTGCACTACAGAACTTTgt	TMEM52B
bta-miR-320a	ENSBTAT00000000049	ENSBTAG00000000044	1514	1534	-14.69	tTTTCGACG-AACCCgagacga	x|||||||xx|||x|xxxxxxx	aAAAGCTGGGTTGAGagggcga	MYADML2
bta-miR-320a	ENSBTAT00000000071	ENSBTAG00000000064	520	542	-13.45	gTTTCGACCATTAGTTTgggaac	x||||||||x:x|x|:|xxxxxx	aAAAGCTGG-GTTGAGAgggcga	FEN1
bta-miR-320a	ENSBTAT00000000089	ENSBTAG00000000082	659	679	-12.63	gTTTCGACGAGA-TCTTggggg	x|||||||xx:|x|||:xxxxx	aAAAGCTGGGTTGAGAGggcga	KCNJ14
bta-miR-320a	ENSBTAT00000000114	ENSBTAG00000000105	2138	2161	-18	aTTTCGACTGATAAATCTCgaata	x|||||||:xx:||x||||xxxxx	aAAAGCTGG--GTTGAGAGggcga	RIT1
bta-miR-320a	ENSBTAT00000000158	ENSBTAG00000000137	70	97	-21.59	tTTTCGACAGTCACTTGACGTTCCCagg	x|||||||xx:||xxxx||x:||||xxx	aAAAGCTG--GGT----TGAGAGGGcga	FRYL
bta-miR-320a	ENSBTAT00000000230	ENSBTAG00000000197	435	456	-21.21	tTTTCGACGTTTATCTTCCatt	x|||||||x:xxx|||:||xxx	aAAAGCTGGGTTGAGAGGGcga	TRMT10A
bta-miR-320a	ENSBTAT00000000294	ENSBTAG00000000240	723	742	-12.99	tTTTCGAC--AATGGTCACtaa	x|||||||xx||:xx||x|xxx	aAAAGCTGGGTTGAGAGGGcga	AKAP7
bta-miR-320a	ENSBTAT00000000437	ENSBTAG00000000332	77	98	-12.81	tTTTCGACgggagcggaggtcc	x|||||||xxxxxxxxxxxxxx	aAAAGCTGggttgagagggcga	ERF
bta-miR-320a	ENSBTAT00000000461	ENSBTAG00000000355	773	794	-18.11	gTTTCGACTAAGACCTACTGta	x|||||||:x|:xx||x|:|xx	aAAAGCTGGGTTGAGAGGGCga	OXLD1
bta-miR-320a	ENSBTAT00000000498	ENSBTAG00000000387	1074	1095	-19.36	tTTTCGACTTACCCCgattcag	x|||||||::|x|x|xxxxxxx	aAAAGCTGGGTTGAGagggcga	NICN1
bta-miR-320a	ENSBTAT00000000504	ENSBTAG00000000392	592	615	-18.06	cTTTCGACATCCCCCCGTCCCtac	x|||||||xx||xx|xx||||xxx	aAAAGCTG--GGTTGAGAGGGcga	ASCC1
bta-miR-320a	ENSBTAT00000000538	ENSBTAG00000055145	856	877	-21.46	aTTTCGACCCGAagggaccacc	x|||||||||:|xxxxxxxxxx	aAAAGCTGGGTTgagagggcga	-
bta-miR-320a	ENSBTAT00000000549	ENSBTAG00000000428	125	146	-15.11	gTTTCGACCTCACgggtgaatg	x||||||||:x||xxxxxxxxx	aAAAGCTGGGTTGagagggcga	BAK1
bta-miR-320a	ENSBTAT00000000619	ENSBTAG00000000490	260	282	-20.87	gTTTCGACC-AATTACGTCCCtcc	x||||||||x||:|x|x||||xxx	aAAAGCTGGGTTGA-G-AGGGcga	RTKN
bta-miR-320a	ENSBTAT00000000697	ENSBTAG00000000536	2275	2295	-15.38	cTTTCGACGTAG-TCTTACaat	x|||||||x:|:x|||:x|xxx	aAAAGCTGGGTTGAGAGGGcga	ZNF395
bta-miR-320a	ENSBTAT00000000738	ENSBTAG00000000565	273	294	-14.05	tTTTCGACCAAtaagaaaacaa	x||||||||x|xxxxxxxxxxx	aAAAGCTGGGTtgagagggcga	RFX7
bta-miR-320a	ENSBTAT00000000796	ENSBTAG00000000604	481	502	-16.65	tTTTCGACTGGACaagacaacc	x|||||||:x:||xxxxxxxxx	aAAAGCTGGGTTGagagggcga	GPNMB
bta-miR-320a	ENSBTAT00000000819	ENSBTAG00000000623	625	646	-16.13	tTTTCGACGGTCCTTTCTTttt	x|||||||xxxx||:||::xxx	aAAAGCTGGGTTGAGAGGGcga	-
bta-miR-320a	ENSBTAT00000000837	ENSBTAG00000000634	1082	1103	-18.89	cTTTCGACTGGACTTcagtgga	x|||||||:x:|||:xxxxxxx	aAAAGCTGGGTTGAGagggcga	MLPH
bta-miR-320a	ENSBTAT00000000842	ENSBTAG00000000640	555	576	-14.75	tTTTCGACATAATACaatctgt	x|||||||x:||:x|xxxxxxx	aAAAGCTGGGTTGAGagggcga	SELENOS
bta-miR-320a	ENSBTAT00000000858	ENSBTAG00000000653	1375	1396	-25.06	gTTTCGACCCGGCCCTCaggac	x|||||||||::|x|||xxxxx	aAAAGCTGGGTTGAGAGggcga	PPP1R16B
bta-miR-320a	ENSBTAT00000000876	ENSBTAG00000000666	356	377	-17.15	gTTTCGACTCCAGACACCAGtg	x|||||||:|x|xx|x||x|xx	aAAAGCTGGGTTGAGAGGGCga	GHDC
bta-miR-320a	ENSBTAT00000000937	ENSBTAG00000000703	697	717	-24.04	tTTTCGACCCCGGAC-CCCGgc	x|||||||||x:xx|x||||xx	aAAAGCTGGGTTGAGAGGGCga	ST6GAL2
bta-miR-320a	ENSBTAT00000000972	ENSBTAG00000000730	192	213	-13.66	aTTTCGACTATAAAATCGTGat	x|||||||:xx|xxx||x:|xx	aAAAGCTGGGTTGAGAGGGCga	GCG
bta-miR-320a	ENSBTAT00000001095	ENSBTAG00000000829	85	106	-21.22	tTTTCGACTCGTGTCTCgacag	x|||||||:|:xx||||xxxxx	aAAAGCTGGGTTGAGAGggcga	SHPK
bta-miR-320a	ENSBTAT00000001098	ENSBTAG00000000833	628	650	-20.74	gTTTCGACACTAATTTTTTTaca	x|||||||x|:||:|:|:::xxx	aAAAGCTG-GGTTGAGAGGGcga	TAX1BP3
bta-miR-320a	ENSBTAT00000001113	ENSBTAG00000000837	143	162	-20.06	tTTTCGACCC--TTTTAGCGac	x|||||||||xx:|:|xx||xx	aAAAGCTGGGTTGAGAGGGCga	PARP1
bta-miR-320a	ENSBTAT00000001114	ENSBTAG00000000841	218	241	-19.79	gTTTCGACCTCCAGACCGGCCGac	x||||||||xx||:xx|xx|||xx	aAAAGCTGG--GTTGAGAGGGCga	LZTS1
bta-miR-320a	ENSBTAT00000001222	ENSBTAG00000000923	213	232	-16.79	gTTTCGAC--AACTCcggtgca	x|||||||xx|||||xxxxxxx	aAAAGCTGGGTTGAGagggcga	HOXC13
bta-miR-320a	ENSBTAT00000001235	ENSBTAG00000000933	346	367	-12.85	gTTTCGACTaggaccacaagac	x|||||||:xxxxxxxxxxxxx	aAAAGCTGGgttgagagggcga	CCDC183
bta-miR-320a	ENSBTAT00000001294	ENSBTAG00000000978	564	584	-12.4	aTTTCGACGTT-CGTTCACGga	x|||||||x:xx|x:||x||xx	aAAAGCTGGGTTGAGAGGGCga	ASH2L
bta-miR-320a	ENSBTAT00000001309	ENSBTAG00000000990	164	187	-19.12	tTTTCGACCTTCAATTaaattctc	x||||||||xx|||:|xxxxxxxx	aAAAGCTGG--GTTGAgagggcga	PSMA2
bta-miR-320a	ENSBTAT00000001312	ENSBTAG00000000992	522	543	-17.76	gTTTCGACGTAGATCTCaaggt	x|||||||x:|:x||||xxxxx	aAAAGCTGGGTTGAGAGggcga	BMP10
bta-miR-320a	ENSBTAT00000001327	ENSBTAG00000001002	748	767	-14.84	cTTTCGAC--GATTTTTCTtac	x|||||||xx:|:|:|:|:xxx	aAAAGCTGGGTTGAGAGGGcga	TCF7
bta-miR-320a	ENSBTAT00000001328	ENSBTAG00000001002	748	767	-14.84	cTTTCGAC--GATTTTTCTtac	x|||||||xx:|:|:|:|:xxx	aAAAGCTGGGTTGAGAGGGcga	TCF7
bta-miR-320a	ENSBTAT00000001329	ENSBTAG00000001002	748	767	-14.84	cTTTCGAC--GATTTTTCTtac	x|||||||xx:|:|:|:|:xxx	aAAAGCTGGGTTGAGAGGGcga	TCF7
bta-miR-320a	ENSBTAT00000001456	ENSBTAG00000001101	1235	1256	-13.67	gTTTCGACTGTTTTAATCCaat	x|||||||:xxx:|xx:||xxx	aAAAGCTGGGTTGAGAGGGcga	IFNLR1
bta-miR-320a	ENSBTAT00000001466	ENSBTAG00000001108	35	56	-16	aTTTCGACCGTTTTTTCaaaag	x||||||||xxx:|:||xxxxx	aAAAGCTGGGTTGAGAGggcga	GMCL1
bta-miR-320a	ENSBTAT00000001658	ENSBTAG00000001254	1161	1181	-13.04	cTTTCGACTTTA-TGTCaaacc	x|||||||::x|x|x||xxxxx	aAAAGCTGGGTTGAGAGggcga	ANKRD46
bta-miR-320a	ENSBTAT00000001782	ENSBTAG00000001353	612	633	-11.87	gTTTCGACACGtggggcgactg	x|||||||x|:xxxxxxxxxxx	aAAAGCTGGGTtgagagggcga	PMPCA
bta-miR-320a	ENSBTAT00000001810	ENSBTAG00000040432	308	330	-18.71	gTTTCGACGCCAAgggacgcgtt	x|||||||x||||xxxxxxxxxx	aAAAGCTG-GGTTgagagggcga	CLDN3
bta-miR-320a	ENSBTAT00000001844	ENSBTAG00000001405	1029	1052	-15.92	cTTTCGACATCTGGTTCTTACtag	x|||||||xx|::::|||:x|xxx	aAAAGCTG--GGTTGAGAGGGcga	GLCE
bta-miR-320a	ENSBTAT00000001868	ENSBTAG00000001425	364	384	-10.14	gTTTCGACG-AACagataactt	x|||||||xx|||xxxxxxxxx	aAAAGCTGGGTTGagagggcga	FBXO11
bta-miR-320a	ENSBTAT00000001888	ENSBTAG00000001440	911	932	-12.98	gTTTCGACTTGTTACTACacac	x|||||||:::x:x||x|xxxx	aAAAGCTGGGTTGAGAGGgcga	PMM2
bta-miR-320a	ENSBTAT00000001923	ENSBTAG00000001470	269	289	-15.94	tTTTCGACTGGG-TCTgagtcc	x|||||||:x::x|||xxxxxx	aAAAGCTGGGTTGAGAgggcga	DTX2
bta-miR-320a	ENSBTAT00000001976	ENSBTAG00000001508	1345	1364	-14.18	cTTTCGACT--ACCGTCgaaaa	x|||||||:xx||xx||xxxxx	aAAAGCTGGGTTGAGAGggcga	SH3RF1
bta-miR-320a	ENSBTAT00000001995	ENSBTAG00000001523	2180	2200	-14.88	tTTTCGACA-ACCTTTTTTaga	x|||||||xx|x||:|:::xxx	aAAAGCTGGGTTGAGAGGGcga	YES1
bta-miR-320a	ENSBTAT00000002003	ENSBTAG00000001528	91	113	-15.3	aTTTCGACAACAACTTaattata	x|||||||xx|||||:xxxxxxx	aAAAGCTGG-GTTGAGagggcga	CDK13
bta-miR-320a	ENSBTAT00000002019	ENSBTAG00000053807	844	865	-11.07	cTTTCGACTgttgggactagat	x|||||||:xxxxxxxxxxxxx	aAAAGCTGGgttgagagggcga	OAS1X
bta-miR-320a	ENSBTAT00000002052	ENSBTAG00000001567	720	741	-14.35	gTTTCGACATTTGTGTCCGGga	x|||||||x:xxx|x|||x|xx	aAAAGCTGGGTTGAGAGGGCga	LRRK1
bta-miR-320a	ENSBTAT00000002066	ENSBTAG00000022109	364	387	-12.17	aTTTCGACACGTAAATCatgtact	x|||||||x|xx||x||xxxxxxx	aAAAGCTGGG--TTGAGagggcga	SCOC
bta-miR-320a	ENSBTAT00000002076	ENSBTAG00000001585	279	300	-16.73	cTTTCGACCCTGTGTTaaagta	x|||||||||x::x:|xxxxxx	aAAAGCTGGGTTGAGAgggcga	WIPF1
bta-miR-320a	ENSBTAT00000002111	ENSBTAG00000001607	1179	1199	-13.54	tTTTCGACA-AACCCaaaaggt	x|||||||xx|||x|xxxxxxx	aAAAGCTGGGTTGAGagggcga	TMEM41B
bta-miR-320a	ENSBTAT00000002130	ENSBTAG00000001627	61	82	-21.6	aTTTCGACCCGAGTCaaggtag	x|||||||||:|x||xxxxxxx	aAAAGCTGGGTTGAGagggcga	-
bta-miR-320a	ENSBTAT00000002131	ENSBTAG00000001626	54	76	-18.16	tTTTCGACTCACATTTTagtttc	x|||||||:||x|:|:|xxxxxx	aAAAGCTGGGT-TGAGAgggcga	CTPS1
bta-miR-320a	ENSBTAT00000002140	ENSBTAG00000001634	226	247	-13.18	tTTTCGACATTGTTTTATTGta	x|||||||x:x::|:|x::|xx	aAAAGCTGGGTTGAGAGGGCga	PHF1
bta-miR-320a	ENSBTAT00000002194	ENSBTAG00000001675	385	408	-18.29	gTTTCGACCACAGAAACTCaaaat	x||||||||x||x|xx|||xxxxx	aAAAGCTGG-GT-TGAGAGggcga	ITPKA
bta-miR-320a	ENSBTAT00000002222	ENSBTAG00000001694	638	660	-24.83	tTTTCGACCCGTTTCCTACCGgg	x|||||||||:x:||x|x|||xx	aAAAGCTGGGTTGAG-AGGGCga	TYRO3
bta-miR-320a	ENSBTAT00000002226	ENSBTAG00000001698	1858	1881	-18.55	cTTTCGACACCCTGTTTTCGTGtc	x|||||||xx||x::|:||x:|xx	aAAAGCTG--GGTTGAGAGGGCga	CHTF8
bta-miR-320a	ENSBTAT00000002243	ENSBTAG00000001712	252	273	-22.34	aTTTCGACCTCCTTCTCTAGtc	x||||||||:xx:||||:x|xx	aAAAGCTGGGTTGAGAGGGCga	CMTM7
bta-miR-320a	ENSBTAT00000002268	ENSBTAG00000001731	1480	1502	-22.3	gTTTCGACGCTCCCCCTCCCcgt	x|||||||x|:xx|x|||||xxx	aAAAGCTG-GGTTGAGAGGGcga	GLYR1
bta-miR-320a	ENSBTAT00000002285	ENSBTAG00000001739	122	144	-25.28	aTTTCGACTAGGTCTCTCTCGag	x|||||||:x::x|||||:||xx	aAAAGCTGGGTT-GAGAGGGCga	CDH20
bta-miR-320a	ENSBTAT00000002312	ENSBTAG00000001764	2091	2111	-13.55	gTTTCGACA-AGTGCGCGTGtg	x|||||||xx|::x|x|x:|xx	aAAAGCTGGGTTGAGAGGGCga	NCAN
bta-miR-320a	ENSBTAT00000002338	ENSBTAG00000037464	96	117	-17.72	tTTTCGACTTCACCCTgacctt	x|||||||::x||x||xxxxxx	aAAAGCTGGGTTGAGAgggcga	TGM6
bta-miR-320a	ENSBTAT00000002376	ENSBTAG00000001817	339	360	-10.43	cTTTCGACGGAGGGTTTggtga	x|||||||xx|:xx:|:xxxxx	aAAAGCTGGGTTGAGAGggcga	TMEM161A
bta-miR-320a	ENSBTAT00000002383	ENSBTAG00000001822	732	754	-14.32	aTTTCGACTAAAACTTgttactt	x|||||||:x||x||:xxxxxxx	aAAAGCTGGGTT-GAGagggcga	SNX10
bta-miR-320a	ENSBTAT00000002395	ENSBTAG00000001832	1187	1207	-16.63	tTTTCGAC--GGCGTCTAGCGgt	x|||||||xx::|x|||xx||xx	aAAAGCTGGGTTG-AGAGGGCga	MRPL10
bta-miR-320a	ENSBTAT00000002434	ENSBTAG00000001868	297	319	-24.76	cTTTCGACCCAGAAGGTACCGtg	x||||||||||x|xxx|x|||xx	aAAAGCTGGGT-TGAGAGGGCga	PCYT2
bta-miR-320a	ENSBTAT00000002506	ENSBTAG00000001926	228	249	-14.92	tTTTCGACTAAAaaccaacata	x|||||||:x||xxxxxxxxxx	aAAAGCTGGGTTgagagggcga	RAD23B
bta-miR-320a	ENSBTAT00000002508	ENSBTAG00000001928	5	29	-16.23	cTTTCGACTTCAGAAACAC-CTCGga	x|||||||::xxxx|||x|x|:||xx	aAAAGCTGGG----TTGAGAGGGCga	PDIA6
bta-miR-320a	ENSBTAT00000002536	ENSBTAG00000001952	864	885	-21.13	tTTTCGACCCATCgacaacttc	x||||||||||x|xxxxxxxxx	aAAAGCTGGGTTGagagggcga	PROM2
bta-miR-320a	ENSBTAT00000002563	ENSBTAG00000001976	417	435	-17.27	gTTTCGAC---ACTTTCACctc	x|||||||xxx|||:||x|xxx	aAAAGCTGGGTTGAGAGGGcga	PPP1R17
bta-miR-320a	ENSBTAT00000002571	ENSBTAG00000001981	1367	1388	-14.2	gTTTCGACCTGcagacgacagg	x||||||||::xxxxxxxxxxx	aAAAGCTGGGTtgagagggcga	SLC6A17
bta-miR-320a	ENSBTAT00000002662	ENSBTAG00000002056	373	393	-23.78	tTTTCGACTCCA-TCCCCCGga	x|||||||:|x|x||x||||xx	aAAAGCTGGGTTGAGAGGGCga	MARS2
bta-miR-320a	ENSBTAT00000002689	ENSBTAG00000002080	1139	1160	-21.05	tTTTCGACTTGTGTATCCCact	x|||||||:::xx|x||||xxx	aAAAGCTGGGTTGAGAGGGcga	CCN3
bta-miR-320a	ENSBTAT00000002748	ENSBTAG00000002127	1395	1417	-14	tTTTCGACTACAAGTTgtaaagg	x|||||||:x|||x|:xxxxxxx	aAAAGCTGG-GTTGAGagggcga	TCP11L2
bta-miR-320a	ENSBTAT00000002751	ENSBTAG00000002129	541	562	-12.59	aTTTCGACTAAACgtataaatg	x|||||||:x|||xxxxxxxxx	aAAAGCTGGGTTGagagggcga	KLF5
bta-miR-320a	ENSBTAT00000002753	ENSBTAG00000002126	1345	1366	-15.51	tTTTCGACGTAACgtaatgaaa	x|||||||x:|||xxxxxxxxx	aAAAGCTGGGTTGagagggcga	PFKFB2
bta-miR-320a	ENSBTAT00000002779	ENSBTAG00000002144	477	498	-11.86	gTTTCGACGGGGAGTTCaggga	x|||||||xx::xx:||xxxxx	aAAAGCTGGGTTGAGAGggcga	ADRB2
bta-miR-320a	ENSBTAT00000002800	ENSBTAG00000002163	591	613	-15.37	tTTTCGACTGTAACTggttgact	x|||||||:x:||||xxxxxxxx	aAAAGCTGG-GTTGAgagggcga	PTGER2
bta-miR-320a	ENSBTAT00000002823	ENSBTAG00000002179	950	971	-13.77	cTTTCGACTTGAagggattacg	x|||||||:::|xxxxxxxxxx	aAAAGCTGGGTTgagagggcga	CDIN1
bta-miR-320a	ENSBTAT00000002836	ENSBTAG00000002189	1038	1061	-20.98	cTTTCGACCGACGACACTCgacga	x||||||||xx|:||x|||xxxxx	aAAAGCTGG--GTTGAGAGggcga	ALG1
bta-miR-320a	ENSBTAT00000002838	ENSBTAG00000002192	1257	1278	-12.09	aTTTCGACACAGATgatttacc	x|||||||x||:x|xxxxxxxx	aAAAGCTGGGTTGAgagggcga	VXN
bta-miR-320a	ENSBTAT00000002840	ENSBTAG00000002190	907	928	-11.02	gTTTCGACTTAtataagagatc	x|||||||::|xxxxxxxxxxx	aAAAGCTGGGTtgagagggcga	DOCK8
bta-miR-320a	ENSBTAT00000002860	ENSBTAG00000002209	881	904	-21.63	aTTTCGACCGTGAACTCTTatcca	x||||||||xxx||||||:xxxxx	aAAAGCTGGG--TTGAGAGggcga	JPT2
bta-miR-320a	ENSBTAT00000002861	ENSBTAG00000002210	120	141	-25.72	cTTTCGACTCGACTATACCGac	x|||||||:|:|||x|x|||xx	aAAAGCTGGGTTGAGAGGGCga	LAS1L
bta-miR-320a	ENSBTAT00000002865	ENSBTAG00000002211	112	135	-28.7	cTTTCGACGTCCAACTCTCCAGtc	x|||||||xx||||||||||x|xx	aAAAGCTG--GGTTGAGAGGGCga	MAPK8IP3
bta-miR-320a	ENSBTAT00000002929	ENSBTAG00000002272	785	806	-13.76	tTTTCGACTTAAaaaaaagaaa	x|||||||::||xxxxxxxxxx	aAAAGCTGGGTTgagagggcga	KCTD18
bta-miR-320a	ENSBTAT00000002952	ENSBTAG00000002286	451	472	-21.4	cTTTCGACTCAACAATGTTGtt	x|||||||:||||xx|x::|xx	aAAAGCTGGGTTGAGAGGGCga	DNAJC18
bta-miR-320a	ENSBTAT00000002986	ENSBTAG00000002315	566	588	-15.27	tTTTCGACATGGACTTgttttta	x|||||||x::x|||:xxxxxxx	aAAAGCTGGGT-TGAGagggcga	RNF34
bta-miR-320a	ENSBTAT00000003042	ENSBTAG00000002357	1554	1572	-13.91	cTTTCGAC---ACTCGTTTGgg	x|||||||xxx||||x:::|xx	aAAAGCTGGGTTGAGAGGGCga	TICAM2
bta-miR-320a	ENSBTAT00000003076	ENSBTAG00000002374	205	229	-23.47	aTTTCGACCCGGTCCGGTCCACGga	x|||||||||:::x|xx|||x||xx	aAAAGCTGGGTTGAG--AGG-GCga	ARMC5
bta-miR-320a	ENSBTAT00000003082	ENSBTAG00000002385	404	426	-16.69	gTTTCGACGAGAAGGGACCCGgg	x|||||||xxx||xxxx||||xx	aAAAGCTGGG-TTGAGAGGGCga	SLC35E4
bta-miR-320a	ENSBTAT00000003132	ENSBTAG00000002414	3387	3408	-18.1	cTTTCGACCCGGagacggaact	x|||||||||::xxxxxxxxxx	aAAAGCTGGGTTgagagggcga	KCNJ10
bta-miR-320a	ENSBTAT00000003140	ENSBTAG00000002419	484	505	-10.03	aTTTCGACTTtgaggttatgaa	x|||||||::xxxxxxxxxxxx	aAAAGCTGGGttgagagggcga	PIGM
bta-miR-320a	ENSBTAT00000003197	ENSBTAG00000002463	156	177	-15.96	aTTTCGACTCCTTTTTTTactt	x|||||||:|xx:|:|::xxxx	aAAAGCTGGGTTGAGAGGgcga	NDUFB5
bta-miR-320a	ENSBTAT00000003205	ENSBTAG00000002472	1313	1334	-13.81	aTTTCGACACTACTGTagaaaa	x|||||||x|x|||x|xxxxxx	aAAAGCTGGGTTGAGAgggcga	CASP9
bta-miR-320a	ENSBTAT00000003278	ENSBTAG00000002527	2455	2473	-21.98	gTTTCGACTCTA---TCCCGgg	x|||||||:|x|xxx|||||xx	aAAAGCTGGGTTGAGAGGGCga	ZSWIM4
bta-miR-320a	ENSBTAT00000003318	ENSBTAG00000002562	397	416	-22.3	gTTTCGACCCCA-TC-CCAGac	x|||||||||x|x||x||x|xx	aAAAGCTGGGTTGAGAGGGCga	PRAF2
bta-miR-320a	ENSBTAT00000003380	ENSBTAG00000002613	79	99	-26.08	gTTTCGACCTT-CTCTCCTctc	x||||||||:xx||||||:xxx	aAAAGCTGGGTTGAGAGGGcga	MIS18BP1
bta-miR-320a	ENSBTAT00000003425	ENSBTAG00000002647	15	36	-13.48	cTTTCGACggtcaggaaggccg	x|||||||xxxxxxxxxxxxxx	aAAAGCTGggttgagagggcga	RGS10
bta-miR-320a	ENSBTAT00000003497	ENSBTAG00000002701	1541	1562	-20.08	tTTTCGACCGAATTTTgagttg	x||||||||x||:|:|xxxxxx	aAAAGCTGGGTTGAGAgggcga	UGT3A2
bta-miR-320a	ENSBTAT00000003498	ENSBTAG00000002699	1171	1192	-23.83	tTTTCGACCCGACgacgacttt	x|||||||||:||xxxxxxxxx	aAAAGCTGGGTTGagagggcga	KIT
bta-miR-320a	ENSBTAT00000003515	ENSBTAG00000002714	424	445	-20.27	aTTTCGACAAATCTTGACCGtt	x|||||||xx|x||:xx|||xx	aAAAGCTGGGTTGAGAGGGCga	GNAI1
bta-miR-320a	ENSBTAT00000003517	ENSBTAG00000002717	212	235	-14.03	cTTTCGACGTAAGAATCTATTGag	x|||||||x:||xxx|||x::|xx	aAAAGCTGGGTTG--AGAGGGCga	INA
bta-miR-320a	ENSBTAT00000003563	ENSBTAG00000002747	172	193	-10.63	tTTTCGACagtttagaaattta	x|||||||xxxxxxxxxxxxxx	aAAAGCTGggttgagagggcga	ABCA5
bta-miR-320a	ENSBTAT00000003589	ENSBTAG00000002767	456	477	-20.49	cTTTCGACCTTAAGTTCCTcta	x||||||||:x|xx:|||:xxx	aAAAGCTGGGTTGAGAGGGcga	GNB4
bta-miR-320a	ENSBTAT00000003608	ENSBTAG00000002782	310	333	-21	aTTTCGACATCCGACTTcgacctc	x|||||||xx||:|||:xxxxxxx	aAAAGCTG--GGTTGAGagggcga	ZC3H7B
bta-miR-320a	ENSBTAT00000003653	ENSBTAG00000002823	1540	1564	-22.3	gTTTCGACCCGTGAAACGTCTCGac	x|||||||||xxx||xxx||:||xx	aAAAGCTGGG---TTGAGAGGGCga	MPZL1
bta-miR-320a	ENSBTAT00000003678	ENSBTAG00000002837	1259	1280	-11.07	tTTTCGACGTAcaagagtaatg	x|||||||x:|xxxxxxxxxxx	aAAAGCTGGGTtgagagggcga	TOR1B
bta-miR-320a	ENSBTAT00000003694	ENSBTAG00000002849	248	269	-14.8	gTTTCGACGTCAA-TCTTgggac	x|||||||x:|||x|||:xxxxx	aAAAGCTG-GGTTGAGAGggcga	IRF6
bta-miR-320a	ENSBTAT00000003768	ENSBTAG00000002900	5	29	-16.71	cTTTCGACTTCAGAAACGC-CTCGga	x|||||||::xxxx|||x|x|:||xx	aAAAGCTGGG----TTGAGAGGGCga	-
bta-miR-320a	ENSBTAT00000003777	ENSBTAG00000002908	1279	1298	-11.04	tTTTCGAC--AGTTCggaaggt	x|||||||xx|::||xxxxxxx	aAAAGCTGGGTTGAGagggcga	GNG4
bta-miR-320a	ENSBTAT00000003788	ENSBTAG00000002918	119	140	-14.73	tTTTCGACTATATTATCgacaa	x|||||||:xx|:|x||xxxxx	aAAAGCTGGGTTGAGAGggcga	RAD51
bta-miR-320a	ENSBTAT00000003789	ENSBTAG00000002917	603	624	-14.35	aTTTCGACGACATTCAGTCGga	x|||||||xxx|:||xx:||xx	aAAAGCTGGGTTGAGAGGGCga	PRKAG2
bta-miR-320a	ENSBTAT00000003795	ENSBTAG00000002921	552	573	-16.11	tTTTCGACggtcctgtgacctt	x|||||||xxxxxxxxxxxxxx	aAAAGCTGggttgagagggcga	RMDN3
bta-miR-320a	ENSBTAT00000003797	ENSBTAG00000002923	1427	1446	-18.01	cTTTCGACA-AGGTC-CCTGag	x|||||||xx|:x||x||:|xx	aAAAGCTGGGTTGAGAGGGCga	CX3CR1
bta-miR-320a	ENSBTAT00000003812	ENSBTAG00000002929	936	959	-20.22	tTTTCGACACAAACCTTTTTCGgg	x|||||||x|||xx||:|::||xx	aAAAGCTGGGTT--GAGAGGGCga	IRF4
bta-miR-320a	ENSBTAT00000003826	ENSBTAG00000002939	243	262	-14.9	cTTTCGAC--GGGTTTCCaaag	x|||||||xx::x|:|||xxxx	aAAAGCTGGGTTGAGAGGgcga	FURIN
bta-miR-320a	ENSBTAT00000003869	ENSBTAG00000002971	59	79	-18.89	aTTTCGACAGTA-TCTCTTGac	x|||||||xxx|x||||::|xx	aAAAGCTGGGTTGAGAGGGCga	CUTC
bta-miR-320a	ENSBTAT00000003890	ENSBTAG00000002988	447	468	-13.35	gTTTCGACACAATCCaatgact	x|||||||x|||:x|xxxxxxx	aAAAGCTGGGTTGAGagggcga	MACO1
bta-miR-320a	ENSBTAT00000003895	ENSBTAG00000002993	324	345	-15.85	tTTTCGACTTAtatagaacgtc	x|||||||::|xxxxxxxxxxx	aAAAGCTGGGTtgagagggcga	SFT2D1
bta-miR-320a	ENSBTAT00000003899	ENSBTAG00000002996	483	504	-16.02	gTTTCGACGTCACTCTgggatt	x|||||||x:x|||||xxxxxx	aAAAGCTGGGTTGAGAgggcga	SHROOM4
bta-miR-320a	ENSBTAT00000003943	ENSBTAG00000003033	451	473	-11.25	gTTTCGACGTCGTCGTATCAGga	x|||||||x:|:x|x:x:|x|xx	aAAAGCTG-GGTTGAGAGGGCga	GADD45G
bta-miR-320a	ENSBTAT00000004031	ENSBTAG00000003098	1497	1520	-18.4	cTTTCGACAGGTAATTATTCCGgt	x|||||||xxx:||:|x|:|||xx	aAAAGCTGG--GTTGAGAGGGCga	MTDH
bta-miR-320a	ENSBTAT00000004042	ENSBTAG00000003107	696	716	-16.12	tTTTCGACT-GGCACTagtagc	x|||||||:x::|x||xxxxxx	aAAAGCTGGGTTGAGAgggcga	LHX5
bta-miR-320a	ENSBTAT00000004081	ENSBTAG00000003137	181	202	-13.39	aTTTCGACTGGTTTTTTTTttt	x|||||||:x:x:|:|:::xxx	aAAAGCTGGGTTGAGAGGGcga	PLPPR1
bta-miR-320a	ENSBTAT00000004136	ENSBTAG00000003183	727	748	-14.76	gTTTCGACTCtgaagtacgttt	x|||||||:|xxxxxxxxxxxx	aAAAGCTGGGttgagagggcga	NTN4
bta-miR-320a	ENSBTAT00000004165	ENSBTAG00000003208	2311	2331	-15.4	gTTTCGACCAAA-TAACTTGaa	x||||||||x||x|xx|::|xx	aAAAGCTGGGTTGAGAGGGCga	RAB33B
bta-miR-320a	ENSBTAT00000004184	ENSBTAG00000003225	359	379	-25.6	cTTTCGACC-AGGGGTCCCGct	x||||||||x|:xxx|||||xx	aAAAGCTGGGTTGAGAGGGCga	IMP4
bta-miR-320a	ENSBTAT00000004195	ENSBTAG00000008852	486	510	-13.12	gTTTCGACTGTCGAACTgggcactc	x|||||||xxx|x||||xxxxxxxx	aAAAGCTG---GGTTGAgagggcga	SIGLEC10
bta-miR-320a	ENSBTAT00000004201	ENSBTAG00000003237	2655	2676	-16.97	cTTTCGACCTtcgcgggtcggg	x||||||||:xxxxxxxxxxxx	aAAAGCTGGGttgagagggcga	IQSEC1
bta-miR-320a	ENSBTAT00000004211	ENSBTAG00000003245	93	116	-15.3	tTTTCGACATATAACAGTCaaaac	x|||||||x:|xx||xx||xxxxx	aAAAGCTGGGT--TGAGAGggcga	BCAR3
bta-miR-320a	ENSBTAT00000004219	ENSBTAG00000003255	216	237	-27.03	cTTTCGACCCTCCCCTCTCcgg	x|||||||||xx|x|||:|xxx	aAAAGCTGGGTTGAGAGGGcga	CD4
bta-miR-320a	ENSBTAT00000004220	ENSBTAG00000003256	855	877	-18	gTTTCGACTTGGTGTTTCATGtt	x|||||||:::::x|:||x:|xx	aAAAGCTGGGTTG-AGAGGGCga	TOMM34
bta-miR-320a	ENSBTAT00000004256	ENSBTAG00000003282	215	236	-12.57	aTTTCGACCAAGATTataggac	x||||||||x|:x|:xxxxxxx	aAAAGCTGGGTTGAGagggcga	SLCO1A2
bta-miR-320a	ENSBTAT00000004262	ENSBTAG00000003291	472	495	-13.28	aTTTCGACGATCAATTATCACata	x|||||||xx:|||:|x||x|xxx	aAAAGCTG--GGTTGAGAGGGcga	RIMKLB
bta-miR-320a	ENSBTAT00000004298	ENSBTAG00000003319	1313	1334	-20.01	tTTTCGACTTATGTACATCGca	x|||||||::|xx|xxx:||xx	aAAAGCTGGGTTGAGAGGGCga	FLRT3
bta-miR-320a	ENSBTAT00000004383	ENSBTAG00000003382	453	473	-17.53	gTTTCGACGGGGCA-TCCgagc	x|||||||xx::|xx|||xxxx	aAAAGCTGGGTTGAGAGGgcga	RIMS4
bta-miR-320a	ENSBTAT00000004431	ENSBTAG00000003415	199	218	-12.88	tTTTCGAC--AATTCatagttt	x|||||||xx||:||xxxxxxx	aAAAGCTGGGTTGAGagggcga	ESD
bta-miR-320a	ENSBTAT00000004443	ENSBTAG00000003421	307	325	-21.9	tTTTCGACCT--CT-TCCCaat	x||||||||:xx||x||||xxx	aAAAGCTGGGTTGAGAGGGcga	RNF40
bta-miR-320a	ENSBTAT00000004549	ENSBTAG00000003501	970	993	-12.87	aTTTCGACAGTCAACcaggaacta	x|||||||xx:||||xxxxxxxxx	aAAAGCTG--GGTTGagagggcga	SACM1L
bta-miR-320a	ENSBTAT00000004550	ENSBTAG00000003500	1778	1800	-17.68	gTTTCGACCGCCATTTGCgtcct	x||||||||x|x|:|:x|xxxxx	aAAAGCTGG-GTTGAGAGggcga	DCAF7
bta-miR-320a	ENSBTAT00000004559	ENSBTAG00000003504	158	181	-22.87	cTTTCGACCCCCGCCCATCCCccc	x|||||||||xx:|x|x||||xxx	aAAAGCTGGGT-TGAG-AGGGcga	GSS
bta-miR-320a	ENSBTAT00000004626	ENSBTAG00000003557	1934	1955	-19.7	aTTTCGACACCATAGTCTCGga	x|||||||x|x|:xx||:||xx	aAAAGCTGGGTTGAGAGGGCga	CCDC117
bta-miR-320a	ENSBTAT00000004656	ENSBTAG00000003577	137	159	-16.44	cTTTCGACTGTATTACACCTGaa	x|||||||:xx|:|x|x||:|xx	aAAAGCTGGGTTGA-GAGGGCga	GSPT1
bta-miR-320a	ENSBTAT00000004666	ENSBTAG00000003588	286	308	-11.03	gTTTCGACTGTAAATTggtttac	x|||||||:x:||x|:xxxxxxx	aAAAGCTGG-GTTGAGagggcga	ZFAND1
bta-miR-320a	ENSBTAT00000004721	ENSBTAG00000003619	128	151	-15.47	gTTTCGACTTCAAGATTTTACGgt	x|||||||:x|||xx|:|:x||xx	aAAAGCTGG-GTTG-AGAGGGCga	SEC24D
bta-miR-320a	ENSBTAT00000004789	ENSBTAG00000003675	1115	1135	-18.64	tTTTCGACGAGAC-CACCGGgc	x|||||||xx:||x|x||x|xx	aAAAGCTGGGTTGAGAGGGCga	ADGRL1
bta-miR-320a	ENSBTAT00000004876	ENSBTAG00000003745	1647	1670	-18.35	gTTTCGACTCCCGACCCTTTaatc	x|||||||xx||:||x||::xxxx	aAAAGCTG--GGTTGAGAGGgcga	WDR48
bta-miR-320a	ENSBTAT00000004918	ENSBTAG00000003779	998	1019	-24.82	tTTTCGACTGGACTCgacttcg	x|||||||:x:||||xxxxxxx	aAAAGCTGGGTTGAGagggcga	ZC4H2
bta-miR-320a	ENSBTAT00000004931	ENSBTAG00000003791	1110	1131	-10.03	aTTTCGACTTtgaggttatgaa	x|||||||::xxxxxxxxxxxx	aAAAGCTGGGttgagagggcga	LPAR3
bta-miR-320a	ENSBTAT00000004949	ENSBTAG00000003804	30	53	-11.28	tTTTCGACAATTAAGTATgtaaaa	x|||||||xx::||x|x|xxxxxx	aAAAGCTG--GGTTGAGAgggcga	SCCPDH
bta-miR-320a	ENSBTAT00000004955	ENSBTAG00000003807	1646	1667	-16.05	cTTTCGACGCCTCATTCACGaa	x|||||||x|xx|x:||x||xx	aAAAGCTGGGTTGAGAGGGCga	CNOT9
bta-miR-320a	ENSBTAT00000004967	ENSBTAG00000003813	5	26	-18.87	cTTTCGACCCGTGTCgggtcaa	x|||||||||:xx||xxxxxxx	aAAAGCTGGGTTGAGagggcga	BCS1L
bta-miR-320a	ENSBTAT00000005009	ENSBTAG00000003840	129	153	-18.43	aTTTCGACTTATTACTTATTCCttt	x|||||||::|xx|||:x|:||xxx	aAAAGCTGGGT--TGAG-AGGGcga	GUCY1B1
bta-miR-320a	ENSBTAT00000005016	ENSBTAG00000003845	768	793	-21.06	tTTTCGACGCCGGAAACGCCCCCatc	x|||||||x||xxx|||x|x|||xxx	aAAAGCTG-GG---TTGAGAGGGcga	CSRNP1
bta-miR-320a	ENSBTAT00000005170	ENSBTAG00000003966	3328	3349	-15.95	tTTTCGACTgtcgtccattcaa	x|||||||:xxxxxxxxxxxxx	aAAAGCTGGgttgagagggcga	DUSP3
bta-miR-320a	ENSBTAT00000005311	ENSBTAG00000004064	493	516	-25.32	tTTTCGACCACTTATTCTCTCtct	x||||||||xx:x|:||||:|xxx	aAAAGCTGG--GTTGAGAGGGcga	BPNT1
bta-miR-320a	ENSBTAT00000005408	ENSBTAG00000004131	1452	1473	-20.71	aTTTCGACCCGAggattttagc	x|||||||||:|xxxxxxxxxx	aAAAGCTGGGTTgagagggcga	RAP2C
bta-miR-320a	ENSBTAT00000005489	ENSBTAG00000004193	1179	1200	-12.19	gTTTCGACTATGTTCACaaaag	x|||||||:xx::||x|xxxxx	aAAAGCTGGGTTGAGAGggcga	VEZF1
bta-miR-320a	ENSBTAT00000005543	ENSBTAG00000004231	204	224	-21.53	tTTTCGACCTATC-CTCgaaca	x||||||||:|x|x|||xxxxx	aAAAGCTGGGTTGAGAGggcga	GPM6A
bta-miR-320a	ENSBTAT00000005549	ENSBTAG00000004237	1666	1689	-23.29	tTTTCGACAAAACGACTATCCGtg	x|||||||xx|||xx||x:|||xx	aAAAGCTGGGTTGA-GA-GGGCga	BTC
bta-miR-320a	ENSBTAT00000005584	ENSBTAG00000038541	280	303	-16.21	cTTTCGACCACCGACaatggtgta	x||||||||xx|:||xxxxxxxxx	aAAAGCTGG--GTTGagagggcga	ZNF879
bta-miR-320a	ENSBTAT00000005586	ENSBTAG00000039571	1361	1384	-14.33	aTTTCGACCACCAATGTTgagtcg	x||||||||xx|||:x:|xxxxxx	aAAAGCTGG--GTTGAGAgggcga	PROSER2
bta-miR-320a	ENSBTAT00000005642	ENSBTAG00000004305	838	861	-19.54	aTTTCGACGAGTGGTTCTCCGGgg	x|||||||xxx::::|||||x|xx	aAAAGCTGG--GTTGAGAGGGCga	RGS16
bta-miR-320a	ENSBTAT00000005648	ENSBTAG00000004310	550	573	-19.17	tTTTCGACGTCAGGCTCGATTGag	x|||||||x:||:x|||xx::|xx	aAAAGCTG-GGTT-GAGAGGGCga	UBR7
bta-miR-320a	ENSBTAT00000005668	ENSBTAG00000004329	1530	1551	-11.74	aTTTCGACTTcttatagaatgt	x|||||||::xxxxxxxxxxxx	aAAAGCTGGGttgagagggcga	RELL1
bta-miR-320a	ENSBTAT00000005683	ENSBTAG00000004343	589	610	-16.29	aTTTCGACCTAGacgaaactaa	x||||||||:|:xxxxxxxxxx	aAAAGCTGGGTTgagagggcga	CCS
bta-miR-320a	ENSBTAT00000005794	ENSBTAG00000004420	375	396	-13.32	aTTTCGACCGAGggtacggggg	x||||||||x|:xxxxxxxxxx	aAAAGCTGGGTTgagagggcga	BAHD1
bta-miR-320a	ENSBTAT00000005832	ENSBTAG00000004448	13	36	-20.29	aTTTCGACGTCCCGCGGTCCCctc	x|||||||xx||x:|xx||||xxx	aAAAGCTG--GGTTGAGAGGGcga	CKAP5
bta-miR-320a	ENSBTAT00000005847	ENSBTAG00000004460	612	636	-18.64	gTTTCGACAAGGACGGTGTCTCGtc	x|||||||xx:x||xx|x||:||xx	aAAAGCTGGGT-TG--AGAGGGCga	RFWD3
bta-miR-320a	ENSBTAT00000005868	ENSBTAG00000004471	2452	2475	-14.35	tTTTCGACATTTAGATTTATCtag	x|||||||xx::|:x|:|x:|xxx	aAAAGCTG--GGTTGAGAGGGcga	ST3GAL6
bta-miR-320a	ENSBTAT00000005930	ENSBTAG00000045748	444	465	-18.55	gTTTCGACG-GACAAACCGCGgt	x|||||||xx:||xxx||x||xx	aAAAGCTGGGTTGAGAGG-GCga	RAF1
bta-miR-320a	ENSBTAT00000005959	ENSBTAG00000004532	570	591	-14.19	aTTTCGACTTCAGAGTACCatg	x|||||||::x|xxx|x||xxx	aAAAGCTGGGTTGAGAGGGcga	FGFR1OP2
bta-miR-320a	ENSBTAT00000005991	ENSBTAG00000004560	72	92	-23.8	tTTTCGACTTACCT-TCCGGgg	x|||||||::|x||x|||x|xx	aAAAGCTGGGTTGAGAGGGCga	CLEC4F
bta-miR-320a	ENSBTAT00000006069	ENSBTAG00000004625	2	27	-27.66	cTTTCGACCAGGGCTCTGGTCCCGga	x||||||||x::x||||xxx||||xx	aAAAGCTGGGTT-GAGA---GGGCga	PYGB
bta-miR-320a	ENSBTAT00000006114	ENSBTAG00000005278	398	417	-15.3	cTTTCGACTC--CTCatgactc	x|||||||:|xx|||xxxxxxx	aAAAGCTGGGTTGAGagggcga	WEE1
bta-miR-320a	ENSBTAT00000006115	ENSBTAG00000004659	87	110	-22.43	gTTTCGACCCAAACTGTTTACGaa	x|||||||||||x||x|::x||xx	aAAAGCTGGGTT-GAGAGG-GCga	COQ10B
bta-miR-320a	ENSBTAT00000006221	ENSBTAG00000004739	159	180	-10.62	tTTTCGACGAAAaagaaatatt	x|||||||xx||xxxxxxxxxx	aAAAGCTGGGTTgagagggcga	SLC18A2
bta-miR-320a	ENSBTAT00000006222	ENSBTAG00000004741	115	136	-11.47	tTTTCGACTAAAATaaaaacat	x|||||||:x||x|xxxxxxxx	aAAAGCTGGGTTGAgagggcga	IL12B
bta-miR-320a	ENSBTAT00000006381	ENSBTAG00000004852	870	893	-16.62	aTTTCGACCCCGAACTaattataa	x|||||||||xx||||xxxxxxxx	aAAAGCTGGG--TTGAgagggcga	PLEKHO1
bta-miR-320a	ENSBTAT00000006383	ENSBTAG00000004855	190	209	-17.7	cTTTCGAC--GACTTCCGTGtt	x|||||||xx:|||:x|x:|xx	aAAAGCTGGGTTGAGAGGGCga	PRDX6
bta-miR-320a	ENSBTAT00000006397	ENSBTAG00000031686	639	659	-21.12	tTTTCGACCTC-CTTTACTGtt	x||||||||:xx||:|x|:|xx	aAAAGCTGGGTTGAGAGGGCga	ZNF566
bta-miR-320a	ENSBTAT00000006445	ENSBTAG00000004903	159	181	-26.96	cTTTCGACCTCCCTCGTCCCctc	x||||||||:xx|||x||||xxx	aAAAGCTGGGTTGAG-AGGGcga	KRT15
bta-miR-320a	ENSBTAT00000006490	ENSBTAG00000004933	86	109	-12.76	tTTTCGACGTTTGATGTTGTCaca	x|||||||xx:::|:x:|x:|xxx	aAAAGCTG--GGTTGAGAGGGcga	KLHDC2
bta-miR-320a	ENSBTAT00000006518	ENSBTAG00000004956	457	478	-12.49	cTTTCGACACGTCGGTTTTttt	x|||||||x|:x|xx|:::xxx	aAAAGCTGGGTTGAGAGGGcga	CHEK2
bta-miR-320a	ENSBTAT00000006554	ENSBTAG00000004979	2188	2209	-11.21	aTTTCGACACATGTTTagaacc	x|||||||x||xx|:|xxxxxx	aAAAGCTGGGTTGAGAgggcga	MRS2
bta-miR-320a	ENSBTAT00000006619	ENSBTAG00000005028	83	104	-12.56	cTTTCGACgaagacgaggcatc	x|||||||xxxxxxxxxxxxxx	aAAAGCTGggttgagagggcga	HIRIP3
bta-miR-320a	ENSBTAT00000006696	ENSBTAG00000005082	185	206	-12.71	aTTTCGACCAAGTaagtactaa	x||||||||x|::xxxxxxxxx	aAAAGCTGGGTTGagagggcga	MED21
bta-miR-320a	ENSBTAT00000006709	ENSBTAG00000005090	732	751	-12.27	aTTTCGACGT--TTTTACCagg	x|||||||x:xx:|:|x||xxx	aAAAGCTGGGTTGAGAGGGcga	CEMIP2
bta-miR-320a	ENSBTAT00000006800	ENSBTAG00000005158	1847	1868	-19.9	gTTTCGACCTTTTTTTTTgtcc	x||||||||:xx:|:|::xxxx	aAAAGCTGGGTTGAGAGGgcga	NAPG
bta-miR-320a	ENSBTAT00000006842	ENSBTAG00000005190	1209	1230	-16.49	tTTTCGACAGAGGTCATCTtag	x|||||||xx|:x||x:|:xxx	aAAAGCTGGGTTGAGAGGGcga	TSC1
bta-miR-320a	ENSBTAT00000006843	ENSBTAG00000005195	465	484	-11.32	tTTTCGAC--AACTgaataatg	x|||||||xx||||xxxxxxxx	aAAAGCTGGGTTGAgagggcga	ZNF200
bta-miR-320a	ENSBTAT00000006858	ENSBTAG00000005207	342	363	-12.08	aTTTCGACgaagaccgaatact	x|||||||xxxxxxxxxxxxxx	aAAAGCTGggttgagagggcga	COPS7B
bta-miR-320a	ENSBTAT00000006875	ENSBTAG00000005221	558	579	-10.83	gTTTCGACGCttatagtaaacg	x|||||||x|xxxxxxxxxxxx	aAAAGCTGGGttgagagggcga	WNK1
bta-miR-320a	ENSBTAT00000006949	ENSBTAG00000032055	982	1003	-14.73	gTTTCGACTTCTTGTTACCagt	x|||||||::xx:x:|x||xxx	aAAAGCTGGGTTGAGAGGGcga	VPS39
bta-miR-320a	ENSBTAT00000006957	ENSBTAG00000005287	525	546	-11.94	cTTTCGACTTTTTTTaaaaata	x|||||||::xx:|:xxxxxxx	aAAAGCTGGGTTGAGagggcga	CYP7A1
bta-miR-320a	ENSBTAT00000006986	ENSBTAG00000005312	483	503	-18.69	cTTTCGACC-GGTTACCCCacg	x||||||||x:::|xx|||xxx	aAAAGCTGGGTTGAGAGGGcga	MED26
bta-miR-320a	ENSBTAT00000007043	ENSBTAG00000005354	627	649	-12.36	tTTTCGACAACAAaaagtcactt	x|||||||xx|||xxxxxxxxxx	aAAAGCTGG-GTTgagagggcga	LRRFIP1
bta-miR-320a	ENSBTAT00000007050	ENSBTAG00000005362	769	790	-18.74	cTTTCGACGAAAATTTTCTcta	x|||||||xx||x|:|:|:xxx	aAAAGCTGGGTTGAGAGGGcga	RAB23
bta-miR-320a	ENSBTAT00000007057	ENSBTAG00000005354	627	649	-12.36	tTTTCGACAACAAaaagtcactt	x|||||||xx|||xxxxxxxxxx	aAAAGCTGG-GTTgagagggcga	LRRFIP1
bta-miR-320a	ENSBTAT00000007064	ENSBTAG00000005370	562	584	-17.2	aTTTCGACTGAATTGTTGTCGga	x|||||||:x||:|x|:x:||xx	aAAAGCTGGGTTGAGAG-GGCga	TMTC1
bta-miR-320a	ENSBTAT00000007115	ENSBTAG00000005408	66	86	-10.99	tTTTCGACATG-TTTTATTGaa	x|||||||x::x:|:|x::|xx	aAAAGCTGGGTTGAGAGGGCga	CLK1
bta-miR-320a	ENSBTAT00000007139	ENSBTAG00000031358	67	88	-17.16	tTTTCGACTCGTATTACTAGtg	x|||||||:|:xx|:x|:x|xx	aAAAGCTGGGTTGAGAGGGCga	DPYD
bta-miR-320a	ENSBTAT00000007154	ENSBTAG00000005436	299	320	-14.98	tTTTCGACCTttgttgggttta	x||||||||:xxxxxxxxxxxx	aAAAGCTGGGttgagagggcga	SHQ1
bta-miR-320a	ENSBTAT00000007159	ENSBTAG00000005441	692	713	-18.84	tTTTCGACTTGTCTCaaatgta	x|||||||:::x|||xxxxxxx	aAAAGCTGGGTTGAGagggcga	ZMAT2
bta-miR-320a	ENSBTAT00000007187	ENSBTAG00000005464	228	248	-24.97	tTTTCGACCTT-CTTTCCTccc	x||||||||:xx||:|||:xxx	aAAAGCTGGGTTGAGAGGGcga	ADCY6
bta-miR-320a	ENSBTAT00000007200	ENSBTAG00000005475	469	489	-14.92	gTTTCGACC-AAGTGTCggtag	x||||||||x||x|x||xxxxx	aAAAGCTGGGTTGAGAGggcga	TCAF2
bta-miR-320a	ENSBTAT00000007277	ENSBTAG00000005533	923	944	-16.97	tTTTCGACGTGACGGACACGgg	x|||||||x::||xxx|x||xx	aAAAGCTGGGTTGAGAGGGCga	PPP2R5D
bta-miR-320a	ENSBTAT00000007292	ENSBTAG00000005546	52	73	-14.05	gTTTCGACTCGAagagagagag	x|||||||:|:|xxxxxxxxxx	aAAAGCTGGGTTgagagggcga	HOXB7
bta-miR-320a	ENSBTAT00000007323	ENSBTAG00000005572	1024	1045	-18.81	cTTTCGACTCGCGGCTTCTtaa	x|||||||:|:xxx||:|:xxx	aAAAGCTGGGTTGAGAGGGcga	ZNF205
bta-miR-320a	ENSBTAT00000007420	ENSBTAG00000005647	335	356	-14.27	cTTTCGACTgtccgtcgaggct	x|||||||:xxxxxxxxxxxxx	aAAAGCTGGgttgagagggcga	GPR132
bta-miR-320a	ENSBTAT00000007423	ENSBTAG00000039958	1013	1032	-28.98	gTTTCGACCC--CTGTCCCGtg	x|||||||||xx||x|||||xx	aAAAGCTGGGTTGAGAGGGCga	GYS1
bta-miR-320a	ENSBTAT00000007438	ENSBTAG00000005661	1304	1325	-11.2	aTTTCGACTgttttaatgacga	x|||||||:xxxxxxxxxxxxx	aAAAGCTGGgttgagagggcga	SNAP23
bta-miR-320a	ENSBTAT00000007442	ENSBTAG00000005664	213	234	-19.17	tTTTCGACCCTGGTCattttag	x|||||||||x:x||xxxxxxx	aAAAGCTGGGTTGAGagggcga	YWHAE
bta-miR-320a	ENSBTAT00000007452	ENSBTAG00000005672	150	171	-12.94	cTTTCGACgggtgagagagccc	x|||||||xxxxxxxxxxxxxx	aAAAGCTGggttgagagggcga	CDH22
bta-miR-320a	ENSBTAT00000007563	ENSBTAG00000005754	1154	1176	-15.87	cTTTCGACTTTATCTATTACGaa	x|||||||::x|x||x|:x||xx	aAAAGCTGGGTT-GAGAGGGCga	PPM1K
bta-miR-320a	ENSBTAT00000007571	ENSBTAG00000005757	12	33	-16.45	cTTTCGACTAGGTTCcggagtc	x|||||||:x:::||xxxxxxx	aAAAGCTGGGTTGAGagggcga	FUS
bta-miR-320a	ENSBTAT00000007681	ENSBTAG00000005844	776	796	-22.61	tTTTCGACCCG-TTCTGTTGaa	x|||||||||:x:|||x::|xx	aAAAGCTGGGTTGAGAGGGCga	SCAMP2
bta-miR-320a	ENSBTAT00000007723	ENSBTAG00000031252	394	418	-19.3	gTTTCGACGGGGTGCGTCACCCGtc	x|||||||xx:::xxx||x||||xx	aAAAGCTGGGTTG---AGAGGGCga	CD82
bta-miR-320a	ENSBTAT00000007726	ENSBTAG00000005877	678	701	-28.98	tTTTCGACTCGACGGTGTCCCGga	x|||||||:|:||xx|x|||||xx	aAAAGCTGGGTTG--AGAGGGCga	FAM83A
bta-miR-320a	ENSBTAT00000007743	ENSBTAG00000005892	26	48	-25.5	tTTTCGACCCCCGCACCCCCGga	x|||||||||xx:|x|x||||xx	aAAAGCTGGGT-TGAGAGGGCga	ZAP70
bta-miR-320a	ENSBTAT00000007776	ENSBTAG00000005922	1128	1153	-26.99	aTTTCGACTCAAAAACCTCTCCgtgc	x|||||||:|||xxxx||||||xxxx	aAAAGCTGGGTT----GAGAGGgcga	EFCC1
bta-miR-320a	ENSBTAT00000007784	ENSBTAG00000005928	1645	1666	-21.13	cTTTCGACTCACGTCTTCTtga	x|||||||:||xx|||:|:xxx	aAAAGCTGGGTTGAGAGGGcga	MINPP1
bta-miR-320a	ENSBTAT00000007798	ENSBTAG00000005940	812	833	-18.07	tTTTCGACCTGTCggaagaccg	x||||||||::x|xxxxxxxxx	aAAAGCTGGGTTGagagggcga	PRKAB1
bta-miR-320a	ENSBTAT00000007809	ENSBTAG00000005951	21	41	-23.78	aTTTCGACACCCC-CTCCCGgg	x|||||||x|xx|x||||||xx	aAAAGCTGGGTTGAGAGGGCga	HIC2
bta-miR-320a	ENSBTAT00000007833	ENSBTAG00000005967	1240	1260	-18.38	gTTTCGACTCGTC-CTACgttg	x|||||||:|:x|x||x|xxxx	aAAAGCTGGGTTGAGAGGgcga	UBR2
bta-miR-320a	ENSBTAT00000007903	ENSBTAG00000006016	559	578	-22.5	cTTTCGACTC--CTCGACCGga	x|||||||:|xx|||xx|||xx	aAAAGCTGGGTTGAGAGGGCga	GTPBP2
bta-miR-320a	ENSBTAT00000007918	ENSBTAG00000022613	162	183	-13.61	tTTTCGACTggtataagcaaat	x|||||||:xxxxxxxxxxxxx	aAAAGCTGGgttgagagggcga	CYCS
bta-miR-320a	ENSBTAT00000007930	ENSBTAG00000006035	488	513	-21.99	tTTTCGACTCCGGCACCTTTTCTacg	x|||||||:|xxxx|x||:|:|:xxx	aAAAGCTGGG----TTGAGAGGGcga	PPP1R1B
bta-miR-320a	ENSBTAT00000007965	ENSBTAG00000006063	36	57	-20.18	aTTTCGACCCGAATCaaggtag	x|||||||||:|x||xxxxxxx	aAAAGCTGGGTTGAGagggcga	TMEM230
bta-miR-320a	ENSBTAT00000007971	ENSBTAG00000006067	988	1008	-15.9	cTTTCGACG-ACCCCTggagta	x|||||||xx|x|x||xxxxxx	aAAAGCTGGGTTGAGAgggcga	VMAC
bta-miR-320a	ENSBTAT00000008022	ENSBTAG00000006104	311	332	-13.37	cTTTCGACCTTGGTTaagagat	x||||||||:x:x|:xxxxxxx	aAAAGCTGGGTTGAGagggcga	SNU13
bta-miR-320a	ENSBTAT00000008026	ENSBTAG00000006107	10	31	-10.74	cTTTCGACTggggataaaaaac	x|||||||:xxxxxxxxxxxxx	aAAAGCTGGgttgagagggcga	SLF1
bta-miR-320a	ENSBTAT00000008039	ENSBTAG00000006117	379	402	-17.05	gTTTCGACACCCGAGAGTCCTacc	x|||||||xx||:|xxx|||:xxx	aAAAGCTG--GGTTGAGAGGGcga	FLYWCH1
bta-miR-320a	ENSBTAT00000008135	ENSBTAG00000006193	163	184	-14.14	cTTTCGACTCAGgatagagggg	x|||||||:||:xxxxxxxxxx	aAAAGCTGGGTTgagagggcga	IRAK2
bta-miR-320a	ENSBTAT00000008149	ENSBTAG00000006204	1723	1744	-12.81	cTTTCGACGACACgacacgaac	x|||||||xxx||xxxxxxxxx	aAAAGCTGGGTTGagagggcga	XPNPEP3
bta-miR-320a	ENSBTAT00000008168	ENSBTAG00000006221	998	1021	-20.83	tTTTCGACCCATGACACGTACGgg	x||||||||||xx||x|x:x||xx	aAAAGCTGGGT--TGAGAGGGCga	ADGRG3
bta-miR-320a	ENSBTAT00000008184	ENSBTAG00000006234	665	688	-20.27	aTTTCGACTCCCATCTCTTatacc	x|||||||xx|||x||||:xxxxx	aAAAGCTG--GGTTGAGAGggcga	NPR1
bta-miR-320a	ENSBTAT00000008246	ENSBTAG00000006282	537	558	-19.76	gTTTCGACTCTTGTCGTCTGtt	x|||||||:|xxx||x:|:|xx	aAAAGCTGGGTTGAGAGGGCga	POU2AF1
bta-miR-320a	ENSBTAT00000008296	ENSBTAG00000006323	1145	1169	-17.87	aTTTCGACTGCCAAGCGGTTCTGgg	x|||||||xx||||x|xx|:|:|xx	aAAAGCTG--GGTT-GAGAGGGCga	SNX9
bta-miR-320a	ENSBTAT00000008298	ENSBTAG00000006326	928	947	-16.49	tTTTCGAC--AACTGTTCTtaa	x|||||||xx||||x|:|:xxx	aAAAGCTGGGTTGAGAGGGcga	ALDH1L2
bta-miR-320a	ENSBTAT00000008322	ENSBTAG00000006343	27	48	-19.25	gTTTCGACTCGGCgagggcaac	x|||||||:|::|xxxxxxxxx	aAAAGCTGGGTTGagagggcga	IL1R2
bta-miR-320a	ENSBTAT00000008325	ENSBTAG00000006345	872	893	-14.89	cTTTCGACTCATCTagaaggac	x|||||||:||x||xxxxxxxx	aAAAGCTGGGTTGAgagggcga	ART1
bta-miR-320a	ENSBTAT00000008329	ENSBTAG00000006353	600	620	-19.16	tTTTCGACC-ATTTTACTTGtt	x||||||||x|x:|:x|::|xx	aAAAGCTGGGTTGAGAGGGCga	TXNL4B
bta-miR-320a	ENSBTAT00000008336	ENSBTAG00000006350	297	318	-21.23	gTTTCGACCCTGGTCTTgggtc	x|||||||||x:x|||:xxxxx	aAAAGCTGGGTTGAGAGggcga	SLC22A7
bta-miR-320a	ENSBTAT00000008338	ENSBTAG00000034693	2308	2329	-17.18	aTTTCGACTTATGTCACTTGag	x|||||||::|xx||x|::|xx	aAAAGCTGGGTTGAGAGGGCga	SYT1
bta-miR-320a	ENSBTAT00000008367	ENSBTAG00000006378	352	373	-15.26	cTTTCGACTAAATTCaatacaa	x|||||||:x||:||xxxxxxx	aAAAGCTGGGTTGAGagggcga	RIPK1
bta-miR-320a	ENSBTAT00000008462	ENSBTAG00000006452	333	351	-17.57	gTTTCGAC--ATCT-TCCTaac	x|||||||xx|x||x|||:xxx	aAAAGCTGGGTTGAGAGGGcga	CD3D
bta-miR-320a	ENSBTAT00000008606	ENSBTAG00000006551	795	816	-12.77	tTTTCGACTTAttaagacaaaa	x|||||||::|xxxxxxxxxxx	aAAAGCTGGGTtgagagggcga	ESCO2
bta-miR-320a	ENSBTAT00000008608	ENSBTAG00000006552	112	135	-17.92	cTTTCGACCACAGGGTCAGCCtaa	x||||||||x||:xx||xx||xxx	aAAAGCTGG-GTTG-AGAGGGcga	LAMP3
bta-miR-320a	ENSBTAT00000008616	ENSBTAG00000006556	11	32	-11.67	aTTTCGACGTTTCTgaaaaaac	x|||||||x:xx||xxxxxxxx	aAAAGCTGGGTTGAgagggcga	COPB1
bta-miR-320a	ENSBTAT00000008658	ENSBTAG00000006592	109	130	-18.12	gTTTCGACCCCACgaacgagaa	x|||||||||x||xxxxxxxxx	aAAAGCTGGGTTGagagggcga	SGSM1
bta-miR-320a	ENSBTAT00000008722	ENSBTAG00000006639	1615	1637	-24.75	tTTTCGACTTTTTTTCACCCGta	x|||||||::xx:|x|x||||xx	aAAAGCTGGGTTGA-GAGGGCga	CSTF1
bta-miR-320a	ENSBTAT00000008831	ENSBTAG00000006715	1385	1406	-14.6	tTTTCGACAAAACTaatagaac	x|||||||xx||||xxxxxxxx	aAAAGCTGGGTTGAgagggcga	FBXO8
bta-miR-320a	ENSBTAT00000008894	ENSBTAG00000006759	208	230	-14.34	cTTTCGACGTTGTCTTGTTTGat	x|||||||x:::x||:x:::|xx	aAAAGCTG-GGTTGAGAGGGCga	SUCLA2
bta-miR-320a	ENSBTAT00000008924	ENSBTAG00000006779	175	195	-20.67	cTTTCGACC-ATCTCTTTgtat	x||||||||x|x||||::xxxx	aAAAGCTGGGTTGAGAGGgcga	LDHD
bta-miR-320a	ENSBTAT00000008925	ENSBTAG00000006785	95	116	-11.66	cTTTCGACgagggtgcgggcgg	x|||||||xxxxxxxxxxxxxx	aAAAGCTGggttgagagggcga	ARF2
bta-miR-320a	ENSBTAT00000008991	ENSBTAG00000006844	281	307	-22.6	cTTTCGACGAGTCGACTGGGTCCCGga	x|||||||xxx:|:|||xxx|||||xx	aAAAGCTG---GGTTGAG--AGGGCga	LEF1
bta-miR-320a	ENSBTAT00000009144	ENSBTAG00000006957	28	50	-24.32	cTTTCGACCAGGTCGTTCCTGcc	x||||||||x::x|x:|||:|xx	aAAAGCTGGGTT-GAGAGGGCga	SLC2A8
bta-miR-320a	ENSBTAT00000009160	ENSBTAG00000006970	187	206	-11.58	gTTTCGAC--AAGTGTaaacca	x|||||||xx||x|x|xxxxxx	aAAAGCTGGGTTGAGAgggcga	OLA1
bta-miR-320a	ENSBTAT00000009179	ENSBTAG00000006985	1422	1443	-11.81	gTTTCGACTTttcaaaggtcaa	x|||||||::xxxxxxxxxxxx	aAAAGCTGGGttgagagggcga	TM7SF3
bta-miR-320a	ENSBTAT00000009187	ENSBTAG00000006990	1382	1404	-26.37	gTTTCGACTCTTACTCTCCgtcc	x|||||||:|xx|||||||xxxx	aAAAGCTGGGT-TGAGAGGgcga	MYRF
bta-miR-320a	ENSBTAT00000009208	ENSBTAG00000006995	561	584	-14.46	tTTTCGACGTACAGCACACaatca	x|||||||xxx||:|x|x|xxxxx	aAAAGCTGG--GTTGAGAGggcga	SPTBN1
bta-miR-320a	ENSBTAT00000009229	ENSBTAG00000007013	58	79	-19.49	gTTTCGACCTGTCCCaggtgga	x||||||||::x|x|xxxxxxx	aAAAGCTGGGTTGAGagggcga	TOM1L1
bta-miR-320a	ENSBTAT00000009316	ENSBTAG00000007084	478	498	-21.04	gTTTCGACCTG-TTCCCCCagt	x||||||||::x:||x|||xxx	aAAAGCTGGGTTGAGAGGGcga	MAP3K14
bta-miR-320a	ENSBTAT00000009348	ENSBTAG00000007103	690	713	-17.88	cTTTCGACTCTCAATCCGTCCtcc	x|||||||:|xx||:x|x:||xxx	aAAAGCTGGG--TTGAGAGGGcga	ITGAL
bta-miR-320a	ENSBTAT00000009355	ENSBTAG00000007110	854	879	-15.07	tTTTCGACTATCGTAAATCTTTgtaa	x|||||||:xxxx:||x|||::xxxx	aAAAGCTGG----GTTGAGAGGgcga	RCOR3
bta-miR-320a	ENSBTAT00000009364	ENSBTAG00000007116	358	379	-15.16	tTTTCGACATCACTGTaacttg	x|||||||x:x|||x|xxxxxx	aAAAGCTGGGTTGAGAgggcga	ARRDC3
bta-miR-320a	ENSBTAT00000009365	ENSBTAG00000007113	83	106	-18.14	tTTTCGACGTCCAACcagaggcga	x|||||||xx|||||xxxxxxxxx	aAAAGCTG--GGTTGagagggcga	TRRAP
bta-miR-320a	ENSBTAT00000009387	ENSBTAG00000007129	1805	1826	-19.12	cTTTCGACGGACCTCGCCCact	x|||||||xx|x|||x|||xxx	aAAAGCTGGGTTGAGAGGGcga	IRAG1
bta-miR-320a	ENSBTAT00000009392	ENSBTAG00000007137	661	682	-15.3	gTTTCGACTCAAgagtgaacga	x|||||||:|||xxxxxxxxxx	aAAAGCTGGGTTgagagggcga	RFC5
bta-miR-320a	ENSBTAT00000009433	ENSBTAG00000007167	359	382	-16.59	tTTTCGACGTCAAAGTCTagggta	x|||||||xx|x||x|||xxxxxx	aAAAGCTG--GGTTGAGAgggcga	ZMYM5
bta-miR-320a	ENSBTAT00000009487	ENSBTAG00000007214	3490	3513	-16.24	gTTTCGACCGACAACTaaaaaggg	x||||||||xx|||||xxxxxxxx	aAAAGCTGG--GTTGAgagggcga	ELL2
bta-miR-320a	ENSBTAT00000009560	ENSBTAG00000007269	674	693	-15.85	tTTTCGAC--AAGTCctgggtt	x|||||||xx||x||xxxxxxx	aAAAGCTGGGTTGAGagggcga	EIF2B1
bta-miR-320a	ENSBTAT00000009575	ENSBTAG00000007281	247	271	-31.55	tTTTCGACCGAGTGACTCCCCCGct	x||||||||x|xxx||||x||||xx	aAAAGCTGGGT---TGAGAGGGCga	SEMA6C
bta-miR-320a	ENSBTAT00000009613	ENSBTAG00000007308	1049	1073	-26.91	tTTTCGACCCCCCCACCCTCCCtgt	x|||||||||xxxx||x|||||xxx	aAAAGCTGGGT---TGAGAGGGcga	EDC3
bta-miR-320a	ENSBTAT00000009630	ENSBTAG00000007321	100	121	-14.08	tTTTCGACaatcgagcatagaa	x|||||||xxxxxxxxxxxxxx	aAAAGCTGggttgagagggcga	SREK1
bta-miR-320a	ENSBTAT00000009681	ENSBTAG00000007360	146	171	-17.38	gTTTCGACGGGTGACGTTCTTCCccg	x|||||||xxx::||xx|||:||xxx	aAAAGCTGG--GTTG--AGAGGGcga	TMEM43
bta-miR-320a	ENSBTAT00000009709	ENSBTAG00000007385	170	191	-18.27	cTTTCGACCCAAaggaacacat	x|||||||||||xxxxxxxxxx	aAAAGCTGGGTTgagagggcga	EMC7
bta-miR-320a	ENSBTAT00000009715	ENSBTAG00000007390	1083	1104	-15.91	tTTTCGACggagggaactgctg	x|||||||xxxxxxxxxxxxxx	aAAAGCTGggttgagagggcga	VAT1
bta-miR-320a	ENSBTAT00000009736	ENSBTAG00000007403	202	222	-18.35	tTTTCGACC-AATTCgttgatg	x||||||||x||:||xxxxxxx	aAAAGCTGGGTTGAGagggcga	SLC7A3
bta-miR-320a	ENSBTAT00000009864	ENSBTAG00000007499	409	432	-14.8	cTTTCGACTTTCAACaaaattgtc	x|||||||:xx||||xxxxxxxxx	aAAAGCTGG--GTTGagagggcga	HNRNPH2
bta-miR-320a	ENSBTAT00000009897	ENSBTAG00000007520	1778	1800	-19.33	gTTTCGACGCATATCGTGCTGgt	x|||||||x||xx||x|x|:|xx	aAAAGCTGGGTTGAG-AGGGCga	MAPRE2
bta-miR-320a	ENSBTAT00000009935	ENSBTAG00000007550	138	159	-24.05	cTTTCGACCCGCGTTTCCacct	x|||||||||:xx|:|||xxxx	aAAAGCTGGGTTGAGAGGgcga	OLFM2
bta-miR-320a	ENSBTAT00000009957	ENSBTAG00000007567	1808	1829	-14.32	tTTTCGACACtgtaagagcgtt	x|||||||x|xxxxxxxxxxxx	aAAAGCTGGGttgagagggcga	TMX3
bta-miR-320a	ENSBTAT00000009965	ENSBTAG00000013343	62	90	-24.24	tTTTCGACGGATCATCGACGTCTCTCccc	x|||||||xxxxxx:|:||x||||:|xxx	aAAAGCTG------GGTTG-AGAGGGcga	FTL
bta-miR-320a	ENSBTAT00000009977	ENSBTAG00000007584	61	82	-19.99	gTTTCGACAGAAGTTTTCTGtt	x|||||||xx||x|:|:|:|xx	aAAAGCTGGGTTGAGAGGGCga	INPP1
bta-miR-320a	ENSBTAT00000010016	ENSBTAG00000007617	1271	1292	-10.91	aTTTCGACATGTTTCaaaggtt	x|||||||x::x:||xxxxxxx	aAAAGCTGGGTTGAGagggcga	TERF2
bta-miR-320a	ENSBTAT00000010043	ENSBTAG00000007633	1693	1715	-20.78	tTTTCGACCTGCACTGAGTCGta	x||||||||::x|||xxx:||xx	aAAAGCTGGGT-TGAGAGGGCga	ANKRD34B
bta-miR-320a	ENSBTAT00000010081	ENSBTAG00000007661	608	624	-18.66	tTTTCGAC-----TGTCCCGgg	x|||||||xxxxx|x|||||xx	aAAAGCTGGGTTGAGAGGGCga	MYO1F
bta-miR-320a	ENSBTAT00000010121	ENSBTAG00000007696	380	402	-16	aTTTCGACCTTAAATATCTgatt	x||||||||:x||x|x||:xxxx	aAAAGCTGGG-TTGAGAGGgcga	TRAPPC8
bta-miR-320a	ENSBTAT00000010159	ENSBTAG00000007725	221	241	-19.19	tTTTCGACTCA-TTATAACGta	x|||||||:||x:|x|xx||xx	aAAAGCTGGGTTGAGAGGGCga	ARF1
bta-miR-320a	ENSBTAT00000010169	ENSBTAG00000047834	1175	1196	-18.62	tTTTCGACGTTTCTTTCaacga	x|||||||x:xx||:||xxxxx	aAAAGCTGGGTTGAGAGggcga	EFR3A
bta-miR-320a	ENSBTAT00000010180	ENSBTAG00000007743	237	259	-13.64	tTTTCGACTGTAAaacgatacta	x|||||||:x:||xxxxxxxxxx	aAAAGCTGG-GTTgagagggcga	PUS7
bta-miR-320a	ENSBTAT00000010206	ENSBTAG00000007763	1414	1435	-16.75	tTTTCGACAGGAGGGGCCCtct	x|||||||xx:|xxxx|||xxx	aAAAGCTGGGTTGAGAGGGcga	SLC1A4
bta-miR-320a	ENSBTAT00000010210	ENSBTAG00000007765	175	198	-27.41	gTTTCGACCCCCGATTCTCCTccc	x|||||||||xx:|:|||||:xxx	aAAAGCTGGG--TTGAGAGGGcga	TFCP2L1
bta-miR-320a	ENSBTAT00000010240	ENSBTAG00000050253	652	673	-18.57	cTTTCGACCTTTTTGTCTactt	x||||||||:xx:|x||:xxxx	aAAAGCTGGGTTGAGAGGgcga	TRPM3
bta-miR-320a	ENSBTAT00000010269	ENSBTAG00000007806	540	563	-20.02	aTTTCGACCTTCAGTGGTCCCctc	x||||||||xx||::xx||||xxx	aAAAGCTGG--GTTGAGAGGGcga	MTPN
bta-miR-320a	ENSBTAT00000010319	ENSBTAG00000007844	411	432	-17.17	cTTTCGACGTGAGTCTACAGtt	x|||||||x::|x|||x|x|xx	aAAAGCTGGGTTGAGAGGGCga	CETN2
bta-miR-320a	ENSBTAT00000010328	ENSBTAG00000003235	898	919	-18.25	tTTTCGACTCTTTTCggagttt	x|||||||:|xx:||xxxxxxx	aAAAGCTGGGTTGAGagggcga	DHDDS
bta-miR-320a	ENSBTAT00000010381	ENSBTAG00000007893	137	158	-15.99	gTTTCGACTGCCCTTGAACGtg	x|||||||:xxx||:xxx||xx	aAAAGCTGGGTTGAGAGGGCga	SCPEP1
bta-miR-320a	ENSBTAT00000010395	ENSBTAG00000017443	2007	2028	-20.75	cTTTCGACTCGTGTCTTCTtaa	x|||||||:|:xx|||:|:xxx	aAAAGCTGGGTTGAGAGGGcga	-
bta-miR-320a	ENSBTAT00000010425	ENSBTAG00000007927	228	249	-12.84	aTTTCGACATAGTTgatcgaga	x|||||||x:|::|xxxxxxxx	aAAAGCTGGGTTGAgagggcga	SLAMF1
bta-miR-320a	ENSBTAT00000010430	ENSBTAG00000007933	1912	1933	-13.61	gTTTCGACATTTTTCAGTCGaa	x|||||||x:xx:||xx:||xx	aAAAGCTGGGTTGAGAGGGCga	DIPK2A
bta-miR-320a	ENSBTAT00000010434	ENSBTAG00000007937	303	324	-15.48	tTTTCGACAAGAGTCaacataa	x|||||||xx:|x||xxxxxxx	aAAAGCTGGGTTGAGagggcga	PRIM2
bta-miR-320a	ENSBTAT00000010441	ENSBTAG00000007943	2249	2268	-12.16	gTTTCGACT--ATTCattttaa	x|||||||:xx|:||xxxxxxx	aAAAGCTGGGTTGAGagggcga	AZIN1
bta-miR-320a	ENSBTAT00000010457	ENSBTAG00000007953	243	264	-14	gTTTCGACGGGAGTCaggttgc	x|||||||xx:|x||xxxxxxx	aAAAGCTGGGTTGAGagggcga	FBXW7
bta-miR-320a	ENSBTAT00000010474	ENSBTAG00000007962	978	1001	-14.31	gTTTCGACGGTGGCTACTgggcgt	x|||||||xx:::||x||xxxxxx	aAAAGCTGG-GTTGA-GAgggcga	ATP9A
bta-miR-320a	ENSBTAT00000010487	ENSBTAG00000007977	233	253	-14.86	cTTTCGACC-GACTggggtggg	x||||||||x:|||xxxxxxxx	aAAAGCTGGGTTGAgagggcga	LAMP5
bta-miR-320a	ENSBTAT00000010530	ENSBTAG00000008008	599	619	-17.91	cTTTCGACT-ACCTTTCagtga	x|||||||:x|x||:||xxxxx	aAAAGCTGGGTTGAGAGggcga	TLR2
bta-miR-320a	ENSBTAT00000010541	ENSBTAG00000008016	65	85	-14.48	cTTTCGACT-GACCCACaggtt	x|||||||:x:||x|x|xxxxx	aAAAGCTGGGTTGAGAGggcga	STX17
bta-miR-320a	ENSBTAT00000010606	ENSBTAG00000008063	69	90	-14.18	gTTTCGACGTAACgaggacaga	x|||||||x:|||xxxxxxxxx	aAAAGCTGGGTTGagagggcga	PPARA
bta-miR-320a	ENSBTAT00000010617	ENSBTAG00000008074	373	394	-14.82	cTTTCGACatcctggaccaatg	x|||||||xxxxxxxxxxxxxx	aAAAGCTGggttgagagggcga	C1QTNF6
bta-miR-320a	ENSBTAT00000010644	ENSBTAG00000008091	96	121	-21.91	tTTTCGACGATTCCCAGTCTCCgact	x|||||||xxxx||x|x|||||xxxx	aAAAGCTG----GGTTGAGAGGgcga	SELENBP1
bta-miR-320a	ENSBTAT00000010690	ENSBTAG00000008130	197	217	-10.98	gTTTCGACACA-CTagtggtcg	x|||||||x||x||xxxxxxxx	aAAAGCTGGGTTGAgagggcga	MED10
bta-miR-320a	ENSBTAT00000010700	ENSBTAG00000008139	738	759	-18.86	tTTTCGACCTAGgagagaccat	x||||||||:|:xxxxxxxxxx	aAAAGCTGGGTTgagagggcga	HOXA3
bta-miR-320a	ENSBTAT00000010723	ENSBTAG00000008153	2342	2363	-21.29	tTTTCGACCTAAaccgaaattt	x||||||||:||xxxxxxxxxx	aAAAGCTGGGTTgagagggcga	CAMSAP2
bta-miR-320a	ENSBTAT00000010797	ENSBTAG00000008213	1299	1319	-13.14	cTTTCGACC-GGTTGTTagttc	x||||||||x:::|x|:xxxxx	aAAAGCTGGGTTGAGAGggcga	ATMIN
bta-miR-320a	ENSBTAT00000010804	ENSBTAG00000008219	75	95	-11.85	aTTTCGACGAGA-TGTCaaatt	x|||||||xx:|x|x||xxxxx	aAAAGCTGGGTTGAGAGggcga	RBM7
bta-miR-320a	ENSBTAT00000010867	ENSBTAG00000008257	27	47	-14.88	cTTTCGACG-ATCCCAACCGgg	x|||||||xx|x|x|xx|||xx	aAAAGCTGGGTTGAGAGGGCga	-
bta-miR-320a	ENSBTAT00000010991	ENSBTAG00000008343	241	259	-18.39	tTTTCGAC---AGTCTCCTttg	x|||||||xxx|x|||||:xxx	aAAAGCTGGGTTGAGAGGGcga	-
bta-miR-320a	ENSBTAT00000011028	ENSBTAG00000008378	1376	1399	-13.43	tTTTCGACGTCCAGaagtgaatgt	x|||||||xx|||:xxxxxxxxxx	aAAAGCTG--GGTTgagagggcga	FEM1B
bta-miR-320a	ENSBTAT00000011077	ENSBTAG00000008419	135	158	-22.11	cTTTCGACTCCGGGCCCTTCCagt	x|||||||:|xx::|x||:||xxx	aAAAGCTGGG--TTGAGAGGGcga	PDE2A
bta-miR-320a	ENSBTAT00000011083	ENSBTAG00000008424	519	543	-16.43	gTTTCGACGTTTACGTACGTCCGtc	x|||||||x::x||x|x|x:|||xx	aAAAGCTG-GGTTG-A-GAGGGCga	ABR
bta-miR-320a	ENSBTAT00000011146	ENSBTAG00000008471	1193	1217	-20.33	gTTTCGACCTCCTGAGTCTCaagga	x||||||||:xxx:|x||||xxxxx	aAAAGCTGGG---TTGAGAGggcga	MX2
bta-miR-320a	ENSBTAT00000011237	ENSBTAG00000008523	617	637	-13.91	gTTTCGACG-GACTAGCATGac	x|||||||xx:|||xx|x:|xx	aAAAGCTGGGTTGAGAGGGCga	TFE3
bta-miR-320a	ENSBTAT00000011240	ENSBTAG00000008527	1167	1188	-16.97	aTTTCGACTCGGTTTGTTGGat	x|||||||:|:::|:x::x|xx	aAAAGCTGGGTTGAGAGGGCga	SRSF6
bta-miR-320a	ENSBTAT00000011404	ENSBTAG00000008649	395	416	-11.08	tTTTCGACaggtacgggaaaat	x|||||||xxxxxxxxxxxxxx	aAAAGCTGggttgagagggcga	ETV3
bta-miR-320a	ENSBTAT00000011464	ENSBTAG00000008699	1318	1337	-11.99	gTTTCGAC--AATTTTTTTttt	x|||||||xx||:|:|:::xxx	aAAAGCTGGGTTGAGAGGGcga	FEM1C
bta-miR-320a	ENSBTAT00000011481	ENSBTAG00000008713	920	941	-17.79	cTTTCGACCGGAGTCagaggta	x||||||||x:|x||xxxxxxx	aAAAGCTGGGTTGAGagggcga	DCAF4
bta-miR-320a	ENSBTAT00000011514	ENSBTAG00000008737	2244	2265	-12.92	tTTTCGACTacggaaaagacta	x|||||||:xxxxxxxxxxxxx	aAAAGCTGGgttgagagggcga	DR1
bta-miR-320a	ENSBTAT00000011542	ENSBTAG00000008761	198	219	-10.67	aTTTCGACTTTATaagagttgt	x|||||||::x|:xxxxxxxxx	aAAAGCTGGGTTGagagggcga	TRAFD1
bta-miR-320a	ENSBTAT00000011562	ENSBTAG00000008772	356	376	-13.71	tTTTCGACT-AATAGTCgatat	x|||||||:x||:xx||xxxxx	aAAAGCTGGGTTGAGAGggcga	SMC2
bta-miR-320a	ENSBTAT00000011575	ENSBTAG00000008783	445	466	-21.19	aTTTCGACCCAGCgtgaaagac	x||||||||||:|xxxxxxxxx	aAAAGCTGGGTTGagagggcga	HTR7
bta-miR-320a	ENSBTAT00000011591	ENSBTAG00000008798	34	55	-13.24	cTTTCGACTGTCCTTACaaaat	x|||||||:xxx||:x|xxxxx	aAAAGCTGGGTTGAGAGggcga	DRC3
bta-miR-320a	ENSBTAT00000011600	ENSBTAG00000008807	992	1014	-22.13	aTTTCGACCCGTTCACGTCCGga	x|||||||||:xx|x|x:|||xx	aAAAGCTGGGTT-GAGAGGGCga	FBXL22
bta-miR-320a	ENSBTAT00000011658	ENSBTAG00000008853	189	210	-13.29	tTTTCGACTTttcaaaatcaaa	x|||||||::xxxxxxxxxxxx	aAAAGCTGGGttgagagggcga	HNRNPF
bta-miR-320a	ENSBTAT00000011688	ENSBTAG00000008877	2687	2708	-13.67	gTTTCGACTCAGTggtgtacag	x|||||||:||::xxxxxxxxx	aAAAGCTGGGTTGagagggcga	APBA1
bta-miR-320a	ENSBTAT00000011740	ENSBTAG00000008920	987	1007	-21.32	tTTTCGACC-GATTACCCTGaa	x||||||||x:|:|xx||:|xx	aAAAGCTGGGTTGAGAGGGCga	ATP1B4
bta-miR-320a	ENSBTAT00000011834	ENSBTAG00000008990	26	47	-15.65	cTTTCGACgatccgaaccgggt	x|||||||xxxxxxxxxxxxxx	aAAAGCTGggttgagagggcga	DRG1
bta-miR-320a	ENSBTAT00000011880	ENSBTAG00000009021	9	30	-16.27	aTTTCGACAAGGACT-TCACtac	x|||||||xx:x|||x||x|xxx	aAAAGCTGGGT-TGAGAGGGcga	FEZ2
bta-miR-320a	ENSBTAT00000011952	ENSBTAG00000009067	1495	1517	-15.51	gTTTCGACCATGACcgattataa	x||||||||x::||xxxxxxxxx	aAAAGCTGG-GTTGagagggcga	DDX6
bta-miR-320a	ENSBTAT00000011957	ENSBTAG00000009070	403	424	-13.23	cTTTCGACTCAtgtaaaatttt	x|||||||:||xxxxxxxxxxx	aAAAGCTGGGTtgagagggcga	NPFFR2
bta-miR-320a	ENSBTAT00000011966	ENSBTAG00000009076	1078	1099	-22.29	cTTTCGACTAGGTTCTCCTaat	x|||||||:x:::|||||:xxx	aAAAGCTGGGTTGAGAGGGcga	ADD2
bta-miR-320a	ENSBTAT00000012028	ENSBTAG00000009127	1248	1270	-18.86	cTTTCGACCTCAGGTTGCGTGtc	x||||||||x||:x|:x|x:|xx	aAAAGCTGG-GTTGAGAGGGCga	TSPYL4
bta-miR-320a	ENSBTAT00000012029	ENSBTAG00000009121	1748	1766	-14.29	gTTTCGAC---ATTCTTgacga	x|||||||xxx|:|||:xxxxx	aAAAGCTGGGTTGAGAGggcga	STAG2
bta-miR-320a	ENSBTAT00000012101	ENSBTAG00000009183	366	385	-19.57	gTTTCGACCC--CTGTTCGGga	x|||||||||xx||x|:|x|xx	aAAAGCTGGGTTGAGAGGGCga	SHISA5
bta-miR-320a	ENSBTAT00000012173	ENSBTAG00000009236	929	950	-13.82	cTTTCGACTGTCGTCTagactg	x|||||||:xxxx|||xxxxxx	aAAAGCTGGGTTGAGAgggcga	DAGLB
bta-miR-320a	ENSBTAT00000012225	ENSBTAG00000009281	302	325	-16.34	gTTTCGACTTCCCATTCTgggggt	x|||||||xx||x|:|||xxxxxx	aAAAGCTG--GGTTGAGAgggcga	SPRYD4
bta-miR-320a	ENSBTAT00000012259	ENSBTAG00000009307	659	679	-17.53	tTTTCGACTGTACG-TCCaatt	x|||||||:xx||xx|||xxxx	aAAAGCTGGGTTGAGAGGgcga	RER1
bta-miR-320a	ENSBTAT00000012357	ENSBTAG00000009389	312	333	-12.95	tTTTCGACTTttaataaattgt	x|||||||::xxxxxxxxxxxx	aAAAGCTGGGttgagagggcga	HNRNPH1
bta-miR-320a	ENSBTAT00000012542	ENSBTAG00000009534	1	22	-12.8	gTTTCGACTGTGACgacggagt-	x|||||||:x::||xxxxxxxxx	aAAAGCTGG-GTTGagagggcga	NDUFB10
bta-miR-320a	ENSBTAT00000012583	ENSBTAG00000009565	158	178	-14.27	gTTTCGACG-ACCTCGTCaagg	x|||||||xx|x|||x:|xxxx	aAAAGCTGGGTTGAGAGGgcga	RASA1
bta-miR-320a	ENSBTAT00000012586	ENSBTAG00000009568	1647	1669	-13.42	gTTTCGACACCGGaggacagtca	x|||||||x||::xxxxxxxxxx	aAAAGCTG-GGTTgagagggcga	KANK2
bta-miR-320a	ENSBTAT00000012674	ENSBTAG00000009624	201	222	-16.84	gTTTCGACCCGtgggggcggac	x|||||||||:xxxxxxxxxxx	aAAAGCTGGGTtgagagggcga	SGSM3
bta-miR-320a	ENSBTAT00000012721	ENSBTAG00000009654	975	994	-14.01	tTTTCGAC--AATTGACACcaa	x|||||||xx||:|xx|x|xxx	aAAAGCTGGGTTGAGAGGGcga	LPAR1
bta-miR-320a	ENSBTAT00000012808	ENSBTAG00000009709	810	830	-15.51	tTTTCGACC-AACagaaataaa	x||||||||x|||xxxxxxxxx	aAAAGCTGGGTTGagagggcga	TAF5
bta-miR-320a	ENSBTAT00000012820	ENSBTAG00000009719	349	372	-25.53	gTTTCGACAACTGGCTCACCgcca	x|||||||xx|:::|||x||xxxx	aAAAGCTG--GGTTGAGAGGgcga	CALHM2
bta-miR-320a	ENSBTAT00000012833	ENSBTAG00000009732	2407	2428	-12.2	aTTTCGACTTAGgaagtagtag	x|||||||::|:xxxxxxxxxx	aAAAGCTGGGTTgagagggcga	NCBP1
bta-miR-320a	ENSBTAT00000012838	ENSBTAG00000009736	1129	1150	-12.37	gTTTCGACAAAAATAACCaaga	x|||||||xx||x|xx||xxxx	aAAAGCTGGGTTGAGAGGgcga	CDC42BPG
bta-miR-320a	ENSBTAT00000012852	ENSBTAG00000009747	1263	1282	-16.37	aTTTCGACTC--CCGTCCTaac	x|||||||:|xx|xx|||:xxx	aAAAGCTGGGTTGAGAGGGcga	RNFT1
bta-miR-320a	ENSBTAT00000012863	ENSBTAG00000009755	149	169	-19.95	tTTTCGACC-AACACTagacgt	x||||||||x|||x||xxxxxx	aAAAGCTGGGTTGAGAgggcga	GOLGA3
bta-miR-320a	ENSBTAT00000012872	ENSBTAG00000009761	477	499	-11.33	aTTTCGACGTCGTCATTgacatc	x|||||||x:|:x|x:|xxxxxx	aAAAGCTG-GGTTGAGAgggcga	ACTR2
bta-miR-320a	ENSBTAT00000012939	ENSBTAG00000009812	164	185	-18.7	cTTTCGACGTTCCCGTTCgtat	x|||||||x:xx|xx|:|xxxx	aAAAGCTGGGTTGAGAGGgcga	CXCL5
bta-miR-320a	ENSBTAT00000013008	ENSBTAG00000009863	1082	1100	-23.05	tTTTCGACC--ACG-TCCCGat	x||||||||xx||xx|||||xx	aAAAGCTGGGTTGAGAGGGCga	BHLHE40
bta-miR-320a	ENSBTAT00000013015	ENSBTAG00000009867	48	70	-21.78	cTTTCGACTTACGACGTCCCacc	x|||||||::|xxx|x||||xxx	aAAAGCTGGGTTGAG-AGGGcga	FAM71F1
bta-miR-320a	ENSBTAT00000013018	ENSBTAG00000009871	447	468	-13.13	cTTTCGACACcttatagtacga	x|||||||x|xxxxxxxxxxxx	aAAAGCTGGGttgagagggcga	RAB18
bta-miR-320a	ENSBTAT00000013117	ENSBTAG00000009942	768	788	-16.06	gTTTCGACA-AATGGTTCAGcg	x|||||||xx||:xx|:|x|xx	aAAAGCTGGGTTGAGAGGGCga	PLCL2
[truncated: 178,766 more rows]
