# Supplementary material for: Identification and functional analysis of circular RNAs during mitochondrial damage induced by infectious bovine rhinotracheitis virus infection in Madin–Darby bovine kidney cells
Source: Research Square preprint supplement (doi:10.21203/rs.3.rs-6754910/v1), 2025-06-20
Supplement: Supplementary file 7 [file 7ccd95d1d66ee995b3ad705d.xlsx]

## Sheet: Table S6
Table S6：Differentially expressed miRNAs
id	Mock-1_TPM	Mock-2_TPM	Mock-3_TPM	IBRV2-1_TPM	IBRV2-2_TPM	IBRV2-3_TPM
bta-let-7a-5p	22962	26638	21636.8	29924.6	34068.8	34996.9
bta-let-7b	14002.2	15888.9	13633.2	24624.1	31414	22804.8
bta-let-7d	870.444	987.208	897.554	941.2	1063.71	1165.85
bta-let-7e	484.344	540.777	475.869	536.008	640.52	622.078
bta-let-7g	1501.72	1553.4	1526.61	1548.94	1627.09	1735.12
bta-miR-100	9169.23	10026.8	9050.1	9906.11	10669.1	11506.5
bta-miR-10162-5p	9.0016	6.4097	5.8369	10.2336	7.9663	9.9848
bta-miR-106a	2.0326	3.9358	4.4052	1.2551	1.3976	1.1824
bta-miR-10a	16774.9	17389.9	14396.7	20555.6	21091.1	23813.7
bta-miR-10b	12579.6	12147	11156.7	14362.6	13102.9	14353.9
bta-miR-11991	2.9037	0.3374	0.881	3.8617	3.9133	2.4962
bta-miR-1291	0.2904	0.01	0.4405	1.6412	1.6771	0.5255
bta-miR-1296	65.8181	55.7757	65.3067	39.1965	42.4871	40.8588
bta-miR-143	33.393	36.8839	36.5629	16.5089	19.1471	12.481
bta-miR-144	4.162	3.2611	5.0659	1.1585	1.1181	1.1824
bta-miR-1468	3206.99	3575.04	2941.22	3936.94	3993.64	4488.03
bta-miR-146b	23.2299	20.4661	17.7308	27.5148	27.8123	27.5895
bta-miR-148a	3691.91	3498.01	3871.05	4144.41	3858.08	3889.2
bta-miR-152	1652.32	1581.62	1995.32	1227.74	1259.8	1103.71
bta-miR-181b	358.321	338.253	337.877	437.244	385.878	456.015
bta-miR-181c	1.4519	0.7872	0.7709	1.4481	1.9566	4.0727
bta-miR-182	1869.14	1871.41	1686.74	2642.87	2138.61	2268.78
bta-miR-183	1160.82	1240.56	1109.33	1640.46	1689.28	1892.51
bta-miR-191	17482.9	18350.4	16223.8	20217.6	21281.7	26879.8
bta-miR-192	1502.39	1472.55	1455.03	1731.02	1877.82	1562.75
bta-miR-193a-5p	159.222	192.291	155.723	199.651	238.571	210.206
bta-miR-1949	6.485	8.3214	9.2509	16.1227	9.7832	14.1889
bta-miR-196a	184.871	189.817	181.713	226.201	222.917	294.026
bta-miR-200a	101.631	98.5071	107.266	62.7531	64.1499	81.5862
bta-miR-2285bf	0.6775	0.1125	0.881	0.01	0.01	0.01
bta-miR-2285k	814.305	828.09	757.359	890.611	858.406	847.261
bta-miR-2303	4.0652	3.9358	6.828	1.8343	1.3976	1.1824
bta-miR-2332	0.3872	1.1245	0.3304	1.9309	0.9783	2.6276
bta-miR-2335	10.1631	12.1447	10.4623	18.5363	15.0941	9.8534
bta-miR-2370-5p	0.01	0.01	0.01	0.3862	0.1398	1.051
bta-miR-2408	0.6775	0.01	1.3216	0.01	0.01	0.01
bta-miR-2431-3p	76.3683	75.9045	72.0246	95.1916	91.6826	94.4613
bta-miR-30a-5p	18757	18717.7	17539.3	24501.7	24465.1	20350
bta-miR-30e-5p	11906.9	11893	10810.3	14112	13013.9	12522.4
bta-miR-30f	2365.87	2159.06	2122.63	2425.65	2338.33	2428.27
bta-miR-31	1583.7	1578.59	1880.13	1076.84	1173.15	1135.11
bta-miR-320a	295.891	334.542	279.949	416.294	545.204	444.586
bta-miR-342	1989.35	1909.76	1728.7	2145.09	2049.86	2648.2
bta-miR-3432a	193.389	208.372	207.043	256.419	324.104	278.26
bta-miR-3613a	47.5245	41.8318	53.3026	27.9975	29.9087	32.5819
bta-miR-425-5p	1046.31	977.649	990.393	1093.35	985.448	1223.27
bta-miR-451	10.9374	54.2014	7.5989	11.7783	3.3542	4.3355
bta-miR-497	26.6176	28.5626	31.497	19.5017	15.7929	16.291
bta-miR-503-3p	12.3893	12.4821	14.7573	6.0822	5.3109	8.8024
bta-miR-574	31.554	51.615	30.5058	67.001	64.5692	73.7034
bta-miR-6119-3p	84.5956	73.9928	86.1211	52.3264	51.0124	55.7046
bta-miR-6119-5p	1426.41	1226.5	1450.4	918.609	739.331	1084.66
bta-miR-6121-3p	12.3893	16.8677	15.1978	8.5923	4.4723	7.7513
bta-miR-6535	0.0968	0.2249	0.5506	1.7378	0.8386	0.6569
bta-miR-671	31.6507	32.8357	34.2502	59.5672	51.0124	50.7122
bta-miR-769	1020.86	1247.08	1107.68	1311.25	1459.23	1035.26
bta-miR-92b	2750.71	3167.86	2810.72	3305.64	3820.34	3304.04
bta-miR-99a-5p	9.0016	9.7832	10.7927	3.7652	0.559	2.3648
bta-miR-99b	6597.87	7272.88	6103.37	7217.57	8112.37	8479.18
let-7-x	1222.18	1276.66	1073.43	2013.51	2013.94	1716.33
let-7-z	101.728	104.017	88.8744	160.648	112.507	118.898
miR-10-z	17.1321	16.6428	17.1802	25.6805	18.0291	18.5244
miR-100-x	65.9149	68.1453	61.0116	78.3931	82.0392	121
miR-100-z	66.3988	62.6352	61.8927	72.7936	61.4944	130.985
miR-101-y	523.06	507.042	530.713	362.134	375.396	323.717
miR-11975-z	3.7749	2.4739	2.2026	0.0965	0.01	0.2628
miR-11986-z	4.4524	4.7229	3.414	2.8963	0.6988	1.3138
miR-11987-z	19.1647	23.8396	29.5147	45.858	38.0147	24.5678
miR-12279-y	0.01	0.01	0.01	0.6758	0.4193	0.2628
miR-12396-x	0.5807	0.4498	0.1101	0.6758	3.494	0.3941
miR-130-x	277.307	288.212	288.539	184.204	200.696	186.426
miR-1307-z	10.4535	8.3214	5.5065	15.0607	12.2989	10.1162
miR-1338-x	1.6455	1.4619	1.2114	0.2896	0.1398	0.01
miR-1386-z	100.469	36.2092	66.5181	33.6936	49.3353	28.7719
miR-139-y	3.0973	0.5623	3.414	5.1168	4.7518	4.4669
miR-1468-y	0.3872	0.5623	0.1101	0.4827	2.7952	0.9197
miR-15-y	191.84	160.58	224.994	118.459	136.965	135.977
miR-155-y	21.1973	15.5182	26.5412	6.2753	4.053	9.8534
miR-1599-z	55.171	43.7435	61.342	15.64	17.6098	9.8534
miR-182-x	237.526	205.448	167.507	377.58	223.896	236.876
miR-183-y	28.0695	23.1649	30.2856	33.9832	37.5955	40.7274
miR-192-x	5.1299	4.9478	2.7532	10.8128	6.429	5.5179
miR-20-y	9.9695	10.0081	8.1496	2.4136	4.7518	4.7296
miR-21-x	955.911	860.925	941.165	1335.1	1024.02	854.093
miR-21-z	26.7144	24.177	23.3474	70.0904	39.2726	26.2757
miR-2137-z	10.7438	6.4097	11.4534	27.4183	30.1882	27.5895
miR-222-x	401.684	407.298	401.862	208.63	242.484	253.429
miR-235-y	27.9727	29.5746	33.9198	35.8175	46.5401	43.6177
miR-25-z	2.0326	1.6868	2.7532	3.9583	3.3542	4.861
miR-27-z	192.711	157.994	187	190.19	205.447	583.19
miR-2778-y	1.2583	1.237	0.6608	0.01	0.01	0.01
miR-28-x	17.1321	11.6949	15.1978	18.1501	9.3639	49.5298
miR-2885-z	2.5166	0.3374	1.3216	0.01	0.01	0.01
miR-301-x	49.9443	43.1812	57.4875	19.3086	25.8556	22.8599
miR-3178-z	0.0968	0.2249	0.1101	0.9654	0.6988	1.051
miR-320-y	118.763	125.495	100.328	168.178	175.818	177.23
miR-320-z	38.2326	24.9641	24.7791	57.1536	31.8653	31.2681
miR-331-x	301.021	270.895	359.793	200.134	223.896	223.475
miR-34-y	42.5882	36.659	40.0871	18.9225	22.3616	22.0716
miR-34-z	0.3872	0.8996	0.4405	0.01	0.01	0.01
miR-342-x	22.5524	16.7552	19.2726	31.4731	19.7062	24.8306
miR-342-z	6.485	4.498	3.7444	16.0262	6.2892	5.2551
miR-3535-z	22.5524	22.2653	13.4358	38.1346	17.1905	25.3561
miR-430-y	2.1294	3.2611	0.5506	0.0965	0.2795	0.01
miR-4332-z	8.9048	3.5984	10.7927	35.1417	25.4363	24.3051
miR-4454-z	600.784	500.969	665.511	316.179	380.147	361.291
miR-449-y	24.6818	13.719	18.3916	29.8319	36.0581	34.0271
miR-4497-z	1.839	0.1125	1.5418	6.2753	6.8482	4.5983
miR-452-y	79.1753	83.1013	80.7248	49.6232	49.1955	55.8359
miR-491-y	5.9043	8.3214	9.0306	3.9583	4.3326	4.0727
miR-500-y	191.26	189.593	168.057	223.498	232.421	224.92
miR-502-z	189.614	189.368	167.176	222.049	232.002	224.001
miR-516-x	0.8711	1.6868	0.01	0.01	0.01	0.01
miR-6089-z	2.4198	3.8233	2.2026	6.0822	5.4506	3.5472
miR-6119-y	36.6839	22.6027	27.0918	17.2812	15.6531	17.4734
miR-615-y	362.677	386.044	351.533	396.599	462.047	439.987
miR-6240-z	4.162	3.7109	5.6166	1.5447	1.8169	1.8393
miR-6412-z	64.6566	17.8797	54.6241	6.8546	23.899	5.7807
miR-6529-x	10.647	12.0323	12.5547	16.0262	18.1688	19.8382
miR-7-y	7.9369	10.1206	10.7927	5.4064	4.7518	6.3062
miR-7134-y	0.01	0.2249	1.9823	0.01	0.01	0.01
miR-760-y	15.8738	17.4299	15.5282	17.6674	27.1135	20.8892
miR-769-z	3.3877	4.2731	3.6343	5.503	7.4073	6.0434
miR-8-y	0.9679	0.8996	0.4405	0.01	0.01	0.01
miR-885-y	27.6823	26.3135	32.2679	39.4862	43.4654	38.7567
miR-9-z	688.96	680.554	781.478	427.88	439.406	463.241
miR-92-y	3689.3	3771.83	3360.82	4516.19	4113.56	4495.25
miR-92-z	134.54	149.447	131.715	189.804	171.066	170.53
miR-9226-z	6.0979	6.972	6.3875	3.2825	2.5157	3.2845
miR-9851-x	6.5818	4.6105	2.9735	9.7509	8.8049	8.4082
miR-99-x	110.536	124.146	89.3149	132.94	123.548	121.657
novel-m0004-3p	121.667	126.17	137.221	158.041	154.575	147.67
novel-m0005-5p	121.667	126.17	137.221	158.041	154.575	147.67
novel-m0006-5p	121.667	126.17	137.221	158.041	154.575	147.67
novel-m0007-3p	117.698	140.676	130.834	214.616	168.551	147.407
novel-m0008-5p	45.5887	36.7715	35.1313	26.5494	22.5014	21.9402
novel-m0019-5p	5.5171	4.6105	4.4052	5.8891	7.9663	9.3279
novel-m0021-3p	12.2925	5.9599	6.3875	17.6674	7.547	12.0868
novel-m0023-3p	8.6144	6.4097	7.8192	2.2205	5.4506	2.4962
novel-m0039-5p	6.485	6.7471	8.3698	2.5101	3.2145	1.7079
novel-m0047-5p	7.6465	6.6346	7.4888	1.8343	3.0747	1.8393
novel-m0052-5p	3.0005	3.7109	3.8545	2.0274	1.2578	0.7883
novel-m0053-5p	1.1615	1.3494	1.8722	1.7378	3.7735	3.1531
novel-m0057-3p	3.3877	3.1486	4.4052	1.062	0.6988	0.7883
novel-m0071-5p	5.8075	4.7229	1.6519	0.9654	1.6771	0.1314
novel-m0084-3p	4.4524	2.6988	4.6254	1.6412	0.559	1.4452
novel-m0085-3p	4.4524	2.5864	4.0748	1.3516	0.559	1.1824
novel-m0086-5p	4.4524	2.6988	4.6254	1.6412	0.559	1.4452
novel-m0087-5p	0.5807	1.3494	0.5506	5.503	1.5374	1.4452
novel-m0089-5p	2.323	3.1486	2.533	1.5447	0.559	0.1314
novel-m0092-5p	1.2583	0.4498	0.2203	3.8617	2.7952	2.1021
novel-m0130-5p	2.5166	2.249	2.3127	0.4827	0.2795	1.051
novel-m0136-3p	1.2583	2.1366	3.3039	0.6758	0.4193	0.01
novel-m0140-3p	0.1936	0.5623	0.1101	1.8343	0.6988	3.6786
novel-m0238-5p	0.01	0.8996	0.9912	0.01	0.01	0.01
novel-m0267-3p	0.01	0.8996	1.5418	0.01	0.01	0.01
novel-m0326-5p	0.2904	0.1125	2.2026	0.01	0.01	0.01
novel-m0327-3p	0.2904	0.1125	2.2026	0.01	0.01	0.01
novel-m0544-5p	0.1936	1.6868	0.1101	0.01	0.01	0.01
novel-m0631-5p	0.01	1.0121	0.9912	0.01	0.01	0.01
