# Supplementary material for: Identification and functional analysis of circular RNAs during mitochondrial damage induced by infectious bovine rhinotracheitis virus infection in Madin–Darby bovine kidney cells
Source: Research Square preprint supplement (doi:10.21203/rs.3.rs-6754910/v1), 2025-06-20
Supplement: Supplementary file 8 [file 7dfc62fb3664895fe7f170ed.xlsx]

## Sheet: Table S14
Table S14: KEGG enrichment analysis of candidate target genes of differentially expressed miRNAs
Pathway	out (46)	All (9497)	Pvalue	Qvalue	Pathway ID	Genes	K_IDs
Endocytosis	143	261	5.17235e-23	1.74308e-20	ko04144	ENSBTAG00000017771;ENSBTAG00000026320;ENSBTAG00000026754;ENSBTAG00000004643;ENSBTAG00000020316;ENSBTAG00000014129;ENSBTAG00000025358;ENSBTAG00000002329;ENSBTAG00000018801;ENSBTAG00000009574;ENSBTAG00000009915;ENSBTAG00000039916;ENSBTAG00000046996;ENSBTAG00000015720;ENSBTAG00000018053;ENSBTAG00000033331;ENSBTAG00000000411;ENSBTAG00000046644;ENSBTAG00000004792;ENSBTAG00000014991;ENSBTAG00000016882;…	K12471+K12184+K11981+K23612+K11825+K07888+K17917+K12488+K17918+K12493+K11824+K04500+K12471+K05633+K07891+K12197+K12182+K02833+K12194+K04237+K18466+K18468+K05754+K12188+K04361+K13305+K12186+K04705+K04388+K12190+K07904+K18463+K12488+K07876+K12194+K12486+K18464+K12196+K12193+K18466+K19366+K23484+K21269+K19475+K18465+K12487+K04705+K12473+K10396+K12474+K10054+K04645+K07938+K19368+K12192+K12477+K07889+…
Autophagy - animal	85	153	1.23571e-14	1.44437e-12	ko04140	ENSBTAG00000000738;ENSBTAG00000017525;ENSBTAG00000033543;ENSBTAG00000011765;ENSBTAG00000017077;ENSBTAG00000004282;ENSBTAG00000008719;ENSBTAG00000017788;ENSBTAG00000007622;ENSBTAG00000011041;ENSBTAG00000010664;ENSBTAG00000005400;ENSBTAG00000006642;ENSBTAG00000046644;ENSBTAG00000000013;ENSBTAG00000002883;ENSBTAG00000006526;ENSBTAG00000002625;ENSBTAG00000000163;ENSBTAG00000033983;ENSBTAG00000000510;…	K08803+K08336+K16185+K08341+K01365+K17985+K06068+K04456+K01379+K17603+K18052+K08339+K04345+K02833+K07198+K07204+K04570+K04427+K08270+K04368+K19730+K06528+K04371+K08860+K08342+K21245+K08333+K21247+K21249+K16186+K10802+K02158+K18082+K17906+K17589+K04456+K04440+K08266+K21248+K04688+K07206+K08334+K00914+K18082+K04958+K04382+K17890+K11248+K04688+K08341+K07874+K04371+K04345+K04382+K07827+K17606+K17908+…
Cellular senescence	95	179	1.62768e-14	1.44437e-12	ko04218	ENSBTAG00000025434;ENSBTAG00000001575;ENSBTAG00000004906;ENSBTAG00000004021;ENSBTAG00000006640;ENSBTAG00000017788;ENSBTAG00000010576;ENSBTAG00000010109;ENSBTAG00000039916;ENSBTAG00000002341;ENSBTAG00000014023;ENSBTAG00000010546;ENSBTAG00000005904;ENSBTAG00000021045;ENSBTAG00000046644;ENSBTAG00000008925;ENSBTAG00000019832;ENSBTAG00000003876;ENSBTAG00000033983;ENSBTAG00000019525;ENSBTAG00000016156;…	K18753+K02183+K06626+K02206+K06618+K04456+K04432+K02087+K04500+K02678+K11411+K21776+K10752+K06620+K02833+K10865+K04388+K20858+K04368+K04348+K04371+K17454+K16332+K05863+K15040+K05863+K04973+K08826+K02580+K02183+K04681+K09389+K04456+K06641+K01367+K07206+K04735+K06751+K04682+K13375+K04958+K21769+K06269+K17333+K03362+K08826+K03982+K06751+K04503+K06751+K04451+K13376+K04371+K09406+K06268+K05862+K06751+…
Salmonella infection	120	246	2.0426e-14	1.44437e-12	ko05132	ENSBTAG00000039129;ENSBTAG00000010799;ENSBTAG00000004643;ENSBTAG00000014129;ENSBTAG00000016598;ENSBTAG00000006270;ENSBTAG00000017788;ENSBTAG00000027924;ENSBTAG00000004850;ENSBTAG00000010576;ENSBTAG00000006253;ENSBTAG00000017299;ENSBTAG00000015271;ENSBTAG00000017037;ENSBTAG00000005136;ENSBTAG00000018207;ENSBTAG00000006189;ENSBTAG00000048906;ENSBTAG00000046644;ENSBTAG00000015278;ENSBTAG00000000347;…	K04722+K12751+K23612+K07888+K10413+K04079+K04456+K17923+K23583+K04432+K04437+K10407+K08846+K06071+K23649+K10089+K05692+K23934+K02833+K05754+K07863+K04379+K20282+K04427+K10416+K04368+K16060+K16060+K04492+K04371+K23934+K09487+K10419+K02985+K12793+K04079+K02187+K23484+K04729+K10418+K02861+K20181+K17637+K02580+K02105+K10418+K12755+K20183+K07889+K07887+K05752+K17274+K04456+K04440+K03671+K05755+K10352+…
Protein processing in endoplasmic reticulum	99	190	2.14298e-14	1.44437e-12	ko04141	ENSBTAG00000001928;ENSBTAG00000019508;ENSBTAG00000006270;ENSBTAG00000016562;ENSBTAG00000016874;ENSBTAG00000008068;ENSBTAG00000020525;ENSBTAG00000006045;ENSBTAG00000019105;ENSBTAG00000003644;ENSBTAG00000003757;ENSBTAG00000015116;ENSBTAG00000006533;ENSBTAG00000015114;ENSBTAG00000007662;ENSBTAG00000014971;ENSBTAG00000015716;ENSBTAG00000001926;ENSBTAG00000007438;ENSBTAG00000001548;ENSBTAG00000010945;…	K09584+K10956+K04079+K09540+K09507+K14008+K14005+K09580+K14015+K09562+K09503+K10839+K14012+K08057+K09490+K07342+K10950+K10839+K07151+K04523+K14007+K13250+K13984+K14007+K09586+K13249+K08860+K09487+K05546+K14026+K04079+K10636+K10085+K09561+K06689+K09485+K08288+K14027+K11519+K10082+K04440+K10601+K01367+K09542+K12669+K10575+K14006+K10084+K13989+K09049+K04426+K12670+K10597+K14006+K04431+K03283+K13525+…
Cell cycle	81	147	9.61817e-14	5.40221e-12	ko04110	ENSBTAG00000004906;ENSBTAG00000011589;ENSBTAG00000004021;ENSBTAG00000006640;ENSBTAG00000002108;ENSBTAG00000010109;ENSBTAG00000039916;ENSBTAG00000001937;ENSBTAG00000021045;ENSBTAG00000006919;ENSBTAG00000012698;ENSBTAG00000014453;ENSBTAG00000008934;ENSBTAG00000003971;ENSBTAG00000005664;ENSBTAG00000007237;ENSBTAG00000016243;ENSBTAG00000009121;ENSBTAG00000010384;ENSBTAG00000017976;ENSBTAG00000017019;…	K06626+K06639+K02206+K06618+K16197+K02087+K04500+K03358+K06620+K04501+K06067+K06631+K02365+K17454+K06630+K06637+K16332+K06671+K02213+K06619+K06642+K02212+K02541+K04681+K02209+K09389+K06641+K02214+K06633+K04682+K13375+K16198+K04498+K06634+K16197+K06629+K16198+K04503+K03359+K04451+K13376+K03349+K02210+K04802+K06645+K06628+K05866+K06643+K02606+K03355+K03351+K05867+K06669+K03347+K06670+K02089+K21771+…
Human cytomegalovirus infection	117	243	1.38875e-13	6.68583e-12	ko05163	ENSBTAG00000001575;ENSBTAG00000019404;ENSBTAG00000006143;ENSBTAG00000006640;ENSBTAG00000017788;ENSBTAG00000013016;ENSBTAG00000047223;ENSBTAG00000052413;ENSBTAG00000006642;ENSBTAG00000021045;ENSBTAG00000009578;ENSBTAG00000046644;ENSBTAG00000014972;ENSBTAG00000015114;ENSBTAG00000003021;ENSBTAG00000011628;ENSBTAG00000033983;ENSBTAG00000006208;ENSBTAG00000019525;ENSBTAG00000016156;ENSBTAG00000003971;…	K02183+K05135+K09048+K06618+K04456+K04630+K04632+K04632+K04345+K06620+K05725+K02833+K04261+K08057+K04684+K04361+K04368+K08047+K04348+K04371+K17454+K04438+K05448+K09048+K05760+K02187+K02861+K04538+K02580+K02105+K08046+K02183+K05704+K09389+K04456+K04692+K04688+K07206+K04735+K06751+K04958+K09049+K04630+K03158+K07826+K04467+K12330+K04688+K17333+K04513+K04545+K09048+K03173+K04364+K06751+K04503+K04537+…
MicroRNAs in cancer	91	176	4.41479e-13	1.85973e-11	ko05206	ENSBTAG00000000396;ENSBTAG00000004906;ENSBTAG00000014541;ENSBTAG00000014023;ENSBTAG00000013745;ENSBTAG00000021045;ENSBTAG00000046644;ENSBTAG00000012698;ENSBTAG00000002883;ENSBTAG00000011628;ENSBTAG00000015584;ENSBTAG00000000163;ENSBTAG00000033983;ENSBTAG00000002736;ENSBTAG00000002006;ENSBTAG00000016156;ENSBTAG00000003971;ENSBTAG00000005947;ENSBTAG00000005665;ENSBTAG00000021798;ENSBTAG00000005339;…	K04702+K06626+K04359+K11411+K06484+K06620+K02833+K06067+K07204+K04361+K11459+K08270+K04368+K00558+K16857+K04371+K17454+K01348+K04438+K05083+K05448+K17387+K02187+K06279+K07606+K10145+K04381+K02580+K10577+K16866+K09299+K10127+K06619+K05734+K00510+K09389+K17390+K04692+K05762+K01116+K10605+K02539+K02599+K04498+K09850+K11406+K04513+K23582+K04364+K10373+K04503+K04451+K13376+K04371+K06256+K17383+K07209+…
Chronic myeloid leukemia	52	84	6.60583e-12	2.47352e-10	ko05220	ENSBTAG00000006640;ENSBTAG00000017788;ENSBTAG00000021045;ENSBTAG00000046644;ENSBTAG00000006919;ENSBTAG00000012698;ENSBTAG00000004742;ENSBTAG00000006526;ENSBTAG00000019832;ENSBTAG00000033983;ENSBTAG00000016156;ENSBTAG00000003971;ENSBTAG00000005665;ENSBTAG00000019838;ENSBTAG00000020270;ENSBTAG00000017976;ENSBTAG00000012511;ENSBTAG00000010125;ENSBTAG00000009496;ENSBTAG00000014400;ENSBTAG00000001400;…	K06618+K04456+K06620+K02833+K04501+K06067+K08367+K04570+K04388+K04368+K04371+K17454+K04438+K06279+K02580+K06619+K02158+K11224+K11223+K09389+K04456+K04735+K13375+K04467+K04364+K08878+K04503+K04451+K13376+K04371+K08091+K07209+K04438+K07827+K04496+K06643+K04674+K07828+K08845+K04366+K07210+K02089+K02649+K04402+K04369+K04402+K04496+K06624+K14021+K02649+K06625+K06067
Mitophagy - animal	47	75	3.67847e-11	1.21057e-09	ko04137	ENSBTAG00000011765;ENSBTAG00000004282;ENSBTAG00000005400;ENSBTAG00000010001;ENSBTAG00000046644;ENSBTAG00000003021;ENSBTAG00000007935;ENSBTAG00000012341;ENSBTAG00000006526;ENSBTAG00000005314;ENSBTAG00000016401;ENSBTAG00000000184;ENSBTAG00000003971;ENSBTAG00000019845;ENSBTAG00000008938;ENSBTAG00000013784;ENSBTAG00000007876;ENSBTAG00000019914;ENSBTAG00000013895;ENSBTAG00000001632;ENSBTAG00000006084;…	K08341+K17985+K08339+K07870+K02833+K04684+K21348+K03097+K04570+K06030+K19946+K08860+K17454+K11851+K05704+K03097+K04440+K08334+K04735+K17987+K05688+K03115+K08341+K17969+K04451+K07827+K04440+K14381+K07828+K08341+K05410+K07829+K07830+K21343+K09105+K19945+K07897+K20168+K15485+K04448+K11839+K07831+K08268+K17907+K15637+K21357+K21347
Hepatitis B	85	171	3.95143e-11	1.21057e-09	ko05161	ENSBTAG00000004380;ENSBTAG00000021819;ENSBTAG00000004906;ENSBTAG00000006143;ENSBTAG00000013790;ENSBTAG00000004021;ENSBTAG00000006640;ENSBTAG00000002108;ENSBTAG00000017788;ENSBTAG00000013475;ENSBTAG00000010576;ENSBTAG00000035907;ENSBTAG00000021045;ENSBTAG00000046644;ENSBTAG00000006919;ENSBTAG00000021661;ENSBTAG00000004322;ENSBTAG00000002625;ENSBTAG00000019832;ENSBTAG00000033983;ENSBTAG00000021569;…	K11221+K05130+K06626+K09048+K04416+K02206+K06618+K16197+K04456+K03174+K04432+K11594+K06620+K02833+K04501+K02084+K04379+K04427+K04388+K04368+K10610+K11219+K04371+K17454+K09048+K02187+K04729+K02580+K02158+K11224+K05704+K11223+K09389+K04456+K04692+K04440+K08731+K04735+K13375+K04498+K09049+K16197+K04467+K04431+K04733+K17333+K09048+K04364+K04451+K13376+K04371+K02373+K07209+K04802+K07827+K17332+K12648+…
Proteoglycans in cancer	102	218	4.46415e-11	1.25368e-09	ko05205	ENSBTAG00000018423;ENSBTAG00000020221;ENSBTAG00000009903;ENSBTAG00000023462;ENSBTAG00000014463;ENSBTAG00000003418;ENSBTAG00000017077;ENSBTAG00000011931;ENSBTAG00000017788;ENSBTAG00000006253;ENSBTAG00000039916;ENSBTAG00000006642;ENSBTAG00000013287;ENSBTAG00000013745;ENSBTAG00000006189;ENSBTAG00000009578;ENSBTAG00000046644;ENSBTAG00000015910;ENSBTAG00000011628;ENSBTAG00000006883;ENSBTAG00000033983;…	K12823+K00444+K06225+K02991+K04515+K05763+K01365+K06497+K04456+K04437+K04500+K04345+K06226+K06484+K05692+K05725+K02833+K05719+K04361+K03258+K04368+K16857+K04371+K04515+K01348+K05083+K05448+K05760+K05860+K02187+K03685+K05742+K02105+K16866+K05704+K04456+K04692+K05762+K04688+K04393+K01116+K05697+K13375+K04958+K16338+K06269+K12330+K04688+K02354+K04513+K03985+K04364+K04503+K04451+K13376+K04371+K06256+…
Renal cell carcinoma	48	78	5.80191e-11	1.50403e-09	ko05211	ENSBTAG00000017788;ENSBTAG00000008010;ENSBTAG00000021688;ENSBTAG00000012351;ENSBTAG00000002341;ENSBTAG00000046644;ENSBTAG00000007133;ENSBTAG00000000608;ENSBTAG00000009617;ENSBTAG00000033983;ENSBTAG00000016156;ENSBTAG00000005665;ENSBTAG00000005339;ENSBTAG00000012511;ENSBTAG00000013958;ENSBTAG00000020791;ENSBTAG00000001400;ENSBTAG00000001700;ENSBTAG00000008172;ENSBTAG00000017996;ENSBTAG00000020457;…	K04456+K09594+K01679+K15589+K02678+K02833+K03870+K13105+K07299+K04368+K04371+K04438+K05448+K02158+K05734+K06277+K04456+K04393+K09592+K09592+K13375+K04498+K04364+K13376+K04371+K04438+K04409+K07827+K03872+K04392+K07836+K07828+K09592+K08845+K04353+K09105+K04366+K02649+K04369+K04448+K04410+K17386+K02649+K06625+K03868+K09593+K08268+K05099
Human papillomavirus infection	150	362	1.46461e-10	3.52553e-09	ko05165	ENSBTAG00000004380;ENSBTAG00000019851;ENSBTAG00000020221;ENSBTAG00000020192;ENSBTAG00000016542;ENSBTAG00000021819;ENSBTAG00000004906;ENSBTAG00000006143;ENSBTAG00000015212;ENSBTAG00000004635;ENSBTAG00000004021;ENSBTAG00000006640;ENSBTAG00000012897;ENSBTAG00000017788;ENSBTAG00000013475;ENSBTAG00000007572;ENSBTAG00000005326;ENSBTAG00000011757;ENSBTAG00000047223;ENSBTAG00000052413;ENSBTAG00000006642;…	K11221+K03456+K00444+K11584+K06244+K05130+K06626+K09048+K05131+K06094+K02206+K06618+K06583+K04456+K03174+K02151+K08957+K04505+K04632+K04632+K04345+K06484+K05725+K02833+K06482+K04237+K06067+K02353+K06238+K04261+K03661+K05719+K11584+K04361+K04368+K11219+K16857+K04371+K17454+K16332+K05448+K09048+K05760+K02187+K02157+K02580+K02105+K02158+K03062+K04681+K04456+K02144+K02154+K04688+K11315+K10389+K07206+…
Pancreatic cancer	48	80	2.058e-10	4.62364e-09	ko05212	ENSBTAG00000006640;ENSBTAG00000017788;ENSBTAG00000039916;ENSBTAG00000021045;ENSBTAG00000006919;ENSBTAG00000011628;ENSBTAG00000006526;ENSBTAG00000019832;ENSBTAG00000033983;ENSBTAG00000016156;ENSBTAG00000003971;ENSBTAG00000021798;ENSBTAG00000005339;ENSBTAG00000002918;ENSBTAG00000020270;ENSBTAG00000012511;ENSBTAG00000014400;ENSBTAG00000001400;ENSBTAG00000021523;ENSBTAG00000007876;ENSBTAG00000016851;…	K06618+K04456+K04500+K06620+K04501+K04361+K04570+K04388+K04368+K04371+K17454+K05083+K05448+K04482+K02580+K02158+K09389+K04456+K04692+K04440+K04688+K04393+K04735+K13375+K04467+K01115+K04688+K04503+K04451+K13376+K04371+K07209+K07827+K04392+K04674+K04440+K08845+K04366+K07210+K02089+K02649+K04402+K11217+K04402+K14021+K07835+K02649+K06625
Kaposi sarcoma-associated herpesvirus infection	95	204	2.86993e-10	6.04479e-09	ko05167	ENSBTAG00000020035;ENSBTAG00000004380;ENSBTAG00000001575;ENSBTAG00000021819;ENSBTAG00000011765;ENSBTAG00000015212;ENSBTAG00000017745;ENSBTAG00000006640;ENSBTAG00000017788;ENSBTAG00000013475;ENSBTAG00000021045;ENSBTAG00000046644;ENSBTAG00000004322;ENSBTAG00000033983;ENSBTAG00000019525;ENSBTAG00000011698;ENSBTAG00000016156;ENSBTAG00000003971;ENSBTAG00000005339;ENSBTAG00000015874;ENSBTAG00000002767;…	K17901+K11221+K02183+K05130+K08341+K05131+K05060+K06618+K04456+K03174+K06620+K02833+K04379+K04368+K04348+K11219+K04371+K17454+K05448+K02187+K04538+K02580+K02105+K02183+K05704+K09389+K04456+K04692+K04440+K08334+K05854+K00914+K01116+K04735+K06751+K04958+K04498+K05132+K03158+K07826+K04467+K04431+K17333+K04545+K08341+K03173+K06751+K07985+K04503+K04537+K06751+K04451+K04371+K04542+K02373+K06268+K07209+…
Spliceosome	84	174	3.39839e-10	6.73682e-09	ko03040	ENSBTAG00000018423;ENSBTAG00000011596;ENSBTAG00000035174;ENSBTAG00000007606;ENSBTAG00000011645;ENSBTAG00000037493;ENSBTAG00000001697;ENSBTAG00000021951;ENSBTAG00000016271;ENSBTAG00000002830;ENSBTAG00000008498;ENSBTAG00000001553;ENSBTAG00000030366;ENSBTAG00000047874;ENSBTAG00000014366;ENSBTAG00000048151;ENSBTAG00000013593;ENSBTAG00000016817;ENSBTAG00000007757;ENSBTAG00000013309;ENSBTAG00000004590;…	K12823+K12893+K12880+K12888+K12836+K12838+K12897+K12840+K11098+K12837+K12881+K12741+K12872+K12850+K10599+K12821+K11092+K12857+K12844+K12893+K09567+K06063+K13025+K12856+K21123+K12847+K12863+K12827+K11097+K12890+K12858+K12900+K11091+K12891+K11984+K12829+K12818+K12869+K12893+K12843+K12897+K12867+K12831+K03283+K12621+K12812+K11088+K12662+K12815+K12813+K12852+K11096+K12875+K12832+K12873+K12882+K12889+…
Ubiquitin mediated proteolysis	82	173	1.68028e-09	3.14586e-08	ko04120	ENSBTAG00000021653;ENSBTAG00000013790;ENSBTAG00000021767;ENSBTAG00000036183;ENSBTAG00000015720;ENSBTAG00000001937;ENSBTAG00000014029;ENSBTAG00000009211;ENSBTAG00000000911;ENSBTAG00000007133;ENSBTAG00000014366;ENSBTAG00000018802;ENSBTAG00000000501;ENSBTAG00000005412;ENSBTAG00000045779;ENSBTAG00000018569;ENSBTAG00000021569;ENSBTAG00000035735;ENSBTAG00000005564;ENSBTAG00000024918;ENSBTAG00000003543;…	K10590+K04416+K10580+K10264+K05633+K03358+K10615+K10583+K10576+K03870+K10599+K10585+K10447+K13305+K10573+K10609+K10610+K16060+K04706+K16060+K10456+K10582+K10579+K10582+K10588+K09561+K06689+K10054+K10577+K10608+K10601+K10575+K10605+K10595+K10597+K10604+K02207+K16064+K03362+K06688+K10596+K05630+K10587+K22517+K03359+K10598+K03349+K04552+K10687+K10574+K10688+K04678+K03872+K10684+K20217+K08285+K06643+…
Colorectal cancer	50	89	2.15927e-09	3.82987e-08	ko05210	ENSBTAG00000002742;ENSBTAG00000001424;ENSBTAG00000017788;ENSBTAG00000039916;ENSBTAG00000046644;ENSBTAG00000006919;ENSBTAG00000011628;ENSBTAG00000004322;ENSBTAG00000019832;ENSBTAG00000033983;ENSBTAG00000006844;ENSBTAG00000016156;ENSBTAG00000015874;ENSBTAG00000016577;ENSBTAG00000016420;ENSBTAG00000012511;ENSBTAG00000007684;ENSBTAG00000001400;ENSBTAG00000007876;ENSBTAG00000016851;ENSBTAG00000013573;…	K08735+K08737+K04456+K04500+K02833+K04501+K04361+K04379+K04388+K04368+K04492+K04371+K02187+K02157+K02105+K02158+K08736+K04456+K04440+K04688+K08731+K13375+K04688+K04513+K04364+K04503+K04451+K13376+K04371+K07827+K04392+K04674+K04440+K07828+K08845+K04366+K03083+K02649+K04402+K04369+K04402+K04448+K08733+K02085+K14021+K07835+K02649+K06625+K09784+K08738
Thyroid hormone signaling pathway	60	116	4.27387e-09	7.20148e-08	ko04919	ENSBTAG00000020035;ENSBTAG00000017788;ENSBTAG00000001888;ENSBTAG00000006642;ENSBTAG00000011790;ENSBTAG00000006189;ENSBTAG00000046644;ENSBTAG00000012698;ENSBTAG00000009617;ENSBTAG00000033983;ENSBTAG00000016156;ENSBTAG00000013236;ENSBTAG00000018966;ENSBTAG00000037726;ENSBTAG00000008766;ENSBTAG00000021468;ENSBTAG00000009985;ENSBTAG00000016420;ENSBTAG00000012511;ENSBTAG00000044019;ENSBTAG00000008938;…	K17901+K04456+K15164+K04345+K15156+K05692+K02833+K06067+K07299+K04368+K04371+K15144+K05860+K05857+K05742+K15167+K11644+K02105+K02158+K06062+K05704+K15170+K04456+K15164+K06062+K01116+K19029+K15133+K02599+K04498+K15159+K17902+K04503+K04451+K04371+K11255+K04345+K15162+K07827+K01539+K05692+K06643+K07828+K08550+K04650+K04366+K11404+K07208+K03083+K02649+K06493+K04369+K02677+K09101+K08525+K01540+K02649+…
