# Supplementary material for: Identification and functional analysis of circular RNAs during mitochondrial damage induced by infectious bovine rhinotracheitis virus infection in Madin–Darby bovine kidney cells
Source: Research Square preprint supplement (doi:10.21203/rs.3.rs-6754910/v1), 2025-06-20
Supplement: Supplementary file 9 [file 823ee2c8b7aae3ca1c3601cc.xlsx]

## Sheet: Table S22
Table S22：CircRNA-RBP network
circRNA	symbol of RBPs
novel_circ_003863	ACO2
novel_circ_000011	ACO2
novel_circ_002538	ACO2
novel_circ_002840	ACO2
novel_circ_001771	ACO2
novel_circ_000847	ACO2
novel_circ_001469	ACO2
novel_circ_002511	ACO2
novel_circ_002217	ACO2
novel_circ_003627	ACO2
novel_circ_004067	ACO2
novel_circ_000493	ACO2
novel_circ_001459	ACO2
novel_circ_002187	ACO2
novel_circ_001549	ACO2
novel_circ_000157	ACO2
novel_circ_001323	ACO2
novel_circ_001068	ACO2
novel_circ_001853	ACO2
novel_circ_003020	ACO2
novel_circ_002631	ACO2
novel_circ_002764	ACO2
novel_circ_000246	ACO2
novel_circ_001267	ACO2
novel_circ_003355	ACO2
novel_circ_000696	ACO2
novel_circ_001243	ACO2
novel_circ_000980	ACO2
novel_circ_001482	ACO2
novel_circ_001945	ACO2
novel_circ_000597	ACO2
novel_circ_000224	ACO2
novel_circ_002459	ACO2
novel_circ_003014	ACO2
novel_circ_000408	ACO2
novel_circ_003262	ACO2
novel_circ_003199	ACO2
novel_circ_003707	ACO2
novel_circ_003292	ACO2
novel_circ_001049	ACO2
novel_circ_003401	ACO2
novel_circ_004338	ACO2
novel_circ_004328	ACO2
novel_circ_003156	ACO2
novel_circ_000720	ACO2
novel_circ_003170	ACO2
novel_circ_002876	ACO2
novel_circ_002194	ACO2
novel_circ_000876	ACO2
novel_circ_001814	ACO2
novel_circ_004280	ACO2
novel_circ_003951	ACO2
novel_circ_001990	ACO2
novel_circ_000933	ACO2
novel_circ_002379	ACO2
novel_circ_000685	ACO2
novel_circ_001165	ACO2
novel_circ_001344	ACO2
novel_circ_000848	ACO2
novel_circ_000259	ACO2
novel_circ_003130	ACO2
novel_circ_002466	ACO2
novel_circ_002533	ACO2
novel_circ_001209	ACO2
novel_circ_001533	ACO2
novel_circ_001046	ACO2
novel_circ_000232	ACO2
novel_circ_000201	ACO2
novel_circ_000704	ACO2
novel_circ_002958	ACO2
novel_circ_001245	ACO2
novel_circ_000987	ACO2
novel_circ_001300	ACO2
novel_circ_002263	ACO2
novel_circ_002262	ACO2
novel_circ_001318	ACO2
novel_circ_000866	ACO2
novel_circ_003178	ACO2
novel_circ_000627	ACO2
novel_circ_001435	ACO2
novel_circ_003635	ACO2
novel_circ_004320	ACO2
novel_circ_001112	ACO2
novel_circ_001338	ACO2
novel_circ_000844	ACO2
novel_circ_004044	ACO2
novel_circ_001900	ACO2
novel_circ_003284	ACO2
novel_circ_000660	ACO2
novel_circ_001980	ACO2
novel_circ_003958	ACO2
novel_circ_002715	ACO2
novel_circ_001457	ACO2
novel_circ_003236	ACO2
novel_circ_003155	ACO2
novel_circ_002440	ACO2
novel_circ_001043	ACO2
novel_circ_002477	ACO2
novel_circ_004321	ACO2
novel_circ_003024	ACO2
novel_circ_002587	ACO2
novel_circ_001886	ACO2
novel_circ_003040	ACO2
novel_circ_002790	ACO2
novel_circ_002670	ACO2
novel_circ_001256	ACO2
novel_circ_003595	ACO2
novel_circ_003608	ACO2
novel_circ_002475	ACO2
novel_circ_002480	ACO2
novel_circ_001669	ACO2
novel_circ_003591	ACO2
novel_circ_000227	ACO2
novel_circ_003400	ACO2
novel_circ_002424	ACO2
novel_circ_003752	ACO2
novel_circ_004264	ACO2
novel_circ_004326	ACO2
novel_circ_000239	ACO2
novel_circ_002965	ACO2
novel_circ_002632	ACO2
novel_circ_000237	ACO2
novel_circ_003305	ACO2
novel_circ_001681	ACO2
novel_circ_002834	ACO2
novel_circ_001229	ACO2
novel_circ_000181	ACO2
novel_circ_000016	ACO2
novel_circ_002584	ACO2
novel_circ_002745	ACO2
novel_circ_002385	ACO2
novel_circ_001806	ACO2
novel_circ_002867	ACO2
novel_circ_000011	PTCD3
novel_circ_002538	PTCD3
novel_circ_002840	PTCD3
novel_circ_003863	PTCD3
novel_circ_001771	PTCD3
novel_circ_002511	PTCD3
novel_circ_000847	PTCD3
novel_circ_001469	PTCD3
novel_circ_002217	PTCD3
novel_circ_004067	PTCD3
novel_circ_003627	PTCD3
novel_circ_000493	PTCD3
novel_circ_001459	PTCD3
novel_circ_002187	PTCD3
novel_circ_001549	PTCD3
novel_circ_000157	PTCD3
novel_circ_002764	PTCD3
novel_circ_001068	PTCD3
novel_circ_001853	PTCD3
novel_circ_001267	PTCD3
novel_circ_003014	PTCD3
novel_circ_003020	PTCD3
novel_circ_001323	PTCD3
novel_circ_001243	PTCD3
novel_circ_000246	PTCD3
novel_circ_001482	PTCD3
novel_circ_003355	PTCD3
novel_circ_000224	PTCD3
novel_circ_000980	PTCD3
novel_circ_003401	PTCD3
novel_circ_000696	PTCD3
novel_circ_002631	PTCD3
novel_circ_003707	PTCD3
novel_circ_004338	PTCD3
novel_circ_000597	PTCD3
novel_circ_003199	PTCD3
novel_circ_001945	PTCD3
novel_circ_002459	PTCD3
novel_circ_001049	PTCD3
novel_circ_000408	PTCD3
novel_circ_003292	PTCD3
novel_circ_004328	PTCD3
novel_circ_003170	PTCD3
novel_circ_002194	PTCD3
novel_circ_003262	PTCD3
novel_circ_001990	PTCD3
novel_circ_003951	PTCD3
novel_circ_000876	PTCD3
novel_circ_003156	PTCD3
novel_circ_002876	PTCD3
novel_circ_002379	PTCD3
novel_circ_000720	PTCD3
novel_circ_004280	PTCD3
novel_circ_001814	PTCD3
novel_circ_001344	PTCD3
novel_circ_000685	PTCD3
novel_circ_000933	PTCD3
novel_circ_000259	PTCD3
novel_circ_003130	PTCD3
novel_circ_001209	PTCD3
novel_circ_001165	PTCD3
novel_circ_002533	PTCD3
novel_circ_001533	PTCD3
novel_circ_000232	PTCD3
novel_circ_002466	PTCD3
novel_circ_000848	PTCD3
novel_circ_000704	PTCD3
novel_circ_001046	PTCD3
novel_circ_002958	PTCD3
novel_circ_003178	PTCD3
novel_circ_000201	PTCD3
novel_circ_001245	PTCD3
novel_circ_001318	PTCD3
novel_circ_000987	PTCD3
novel_circ_003635	PTCD3
novel_circ_000866	PTCD3
novel_circ_002262	PTCD3
novel_circ_002263	PTCD3
novel_circ_001435	PTCD3
novel_circ_000627	PTCD3
novel_circ_000844	PTCD3
novel_circ_001112	PTCD3
novel_circ_004320	PTCD3
novel_circ_001338	PTCD3
novel_circ_002715	PTCD3
novel_circ_004044	PTCD3
novel_circ_001300	PTCD3
novel_circ_003284	PTCD3
novel_circ_003958	PTCD3
novel_circ_000660	PTCD3
novel_circ_001900	PTCD3
novel_circ_003236	PTCD3
novel_circ_001980	PTCD3
novel_circ_003155	PTCD3
novel_circ_001457	PTCD3
novel_circ_002440	PTCD3
novel_circ_002477	PTCD3
novel_circ_002587	PTCD3
novel_circ_004321	PTCD3
novel_circ_003024	PTCD3
novel_circ_001256	PTCD3
novel_circ_001886	PTCD3
novel_circ_002790	PTCD3
novel_circ_003040	PTCD3
novel_circ_002670	PTCD3
novel_circ_003608	PTCD3
novel_circ_003595	PTCD3
novel_circ_002480	PTCD3
novel_circ_001669	PTCD3
novel_circ_004326	PTCD3
novel_circ_002475	PTCD3
novel_circ_002424	PTCD3
novel_circ_000227	PTCD3
novel_circ_003591	PTCD3
novel_circ_003400	PTCD3
novel_circ_004264	PTCD3
novel_circ_000239	PTCD3
novel_circ_002632	PTCD3
novel_circ_000237	PTCD3
novel_circ_002965	PTCD3
novel_circ_002834	PTCD3
novel_circ_001681	PTCD3
novel_circ_003305	PTCD3
novel_circ_003752	PTCD3
novel_circ_000181	PTCD3
novel_circ_002385	PTCD3
novel_circ_002584	PTCD3
novel_circ_002745	PTCD3
novel_circ_001806	PTCD3
novel_circ_001229	PTCD3
novel_circ_003863	DDX1
novel_circ_000847	DDX1
novel_circ_000011	DDX1
novel_circ_002538	DDX1
novel_circ_002511	DDX1
novel_circ_002840	DDX1
novel_circ_001771	DDX1
novel_circ_001469	DDX1
novel_circ_002217	DDX1
novel_circ_004067	DDX1
novel_circ_003627	DDX1
novel_circ_000493	DDX1
novel_circ_001459	DDX1
novel_circ_002187	DDX1
novel_circ_001549	DDX1
novel_circ_000157	DDX1
novel_circ_001853	DDX1
novel_circ_001323	DDX1
novel_circ_001068	DDX1
novel_circ_002764	DDX1
novel_circ_003020	DDX1
novel_circ_001267	DDX1
novel_circ_003355	DDX1
novel_circ_000246	DDX1
novel_circ_003014	DDX1
novel_circ_000980	DDX1
novel_circ_001243	DDX1
novel_circ_000224	DDX1
novel_circ_002631	DDX1
novel_circ_001482	DDX1
novel_circ_000597	DDX1
novel_circ_000696	DDX1
novel_circ_001945	DDX1
novel_circ_002459	DDX1
novel_circ_003262	DDX1
novel_circ_000408	DDX1
novel_circ_003707	DDX1
novel_circ_003292	DDX1
novel_circ_003199	DDX1
novel_circ_001043	DDX1
novel_circ_004338	DDX1
novel_circ_001049	DDX1
novel_circ_003401	DDX1
novel_circ_002876	DDX1
novel_circ_003170	DDX1
novel_circ_004328	DDX1
novel_circ_000876	DDX1
novel_circ_001990	DDX1
novel_circ_003951	DDX1
novel_circ_003156	DDX1
novel_circ_000720	DDX1
novel_circ_002194	DDX1
novel_circ_001814	DDX1
novel_circ_004280	DDX1
novel_circ_000685	DDX1
novel_circ_002379	DDX1
novel_circ_001344	DDX1
novel_circ_000933	DDX1
novel_circ_001165	DDX1
novel_circ_000259	DDX1
novel_circ_003130	DDX1
novel_circ_000848	DDX1
novel_circ_001209	DDX1
novel_circ_001533	DDX1
novel_circ_002466	DDX1
novel_circ_002533	DDX1
novel_circ_000232	DDX1
novel_circ_000201	DDX1
novel_circ_001046	DDX1
novel_circ_000704	DDX1
novel_circ_001245	DDX1
novel_circ_002958	DDX1
novel_circ_003178	DDX1
novel_circ_000987	DDX1
novel_circ_001318	DDX1
novel_circ_002262	DDX1
novel_circ_002263	DDX1
novel_circ_000866	DDX1
novel_circ_003635	DDX1
novel_circ_004320	DDX1
novel_circ_001435	DDX1
novel_circ_000627	DDX1
novel_circ_001112	DDX1
novel_circ_000844	DDX1
novel_circ_001300	DDX1
novel_circ_001338	DDX1
novel_circ_004044	DDX1
novel_circ_000660	DDX1
novel_circ_003284	DDX1
novel_circ_001900	DDX1
novel_circ_002715	DDX1
novel_circ_003958	DDX1
novel_circ_001980	DDX1
novel_circ_003236	DDX1
novel_circ_001457	DDX1
novel_circ_003155	DDX1
novel_circ_002440	DDX1
novel_circ_002477	DDX1
novel_circ_004321	DDX1
novel_circ_003024	DDX1
novel_circ_002587	DDX1
novel_circ_004264	DDX1
novel_circ_001886	DDX1
novel_circ_002790	DDX1
novel_circ_003040	DDX1
novel_circ_001256	DDX1
novel_circ_002670	DDX1
novel_circ_003608	DDX1
novel_circ_002834	DDX1
novel_circ_003595	DDX1
novel_circ_003752	DDX1
novel_circ_001669	DDX1
novel_circ_002480	DDX1
novel_circ_002475	DDX1
novel_circ_004326	DDX1
novel_circ_000227	DDX1
novel_circ_003591	DDX1
novel_circ_000928	DDX1
novel_circ_002424	DDX1
novel_circ_001229	DDX1
novel_circ_003400	DDX1
novel_circ_000016	DDX1
novel_circ_002965	DDX1
novel_circ_000239	DDX1
novel_circ_002632	DDX1
novel_circ_000237	DDX1
novel_circ_001681	DDX1
novel_circ_002867	DDX1
novel_circ_003305	DDX1
novel_circ_000181	DDX1
novel_circ_002584	DDX1
novel_circ_002745	DDX1
novel_circ_002385	DDX1
novel_circ_001806	DDX1
novel_circ_000011	FASTKD3
novel_circ_002538	FASTKD3
novel_circ_002840	FASTKD3
novel_circ_003863	FASTKD3
novel_circ_001771	FASTKD3
novel_circ_002511	FASTKD3
novel_circ_000847	FASTKD3
novel_circ_001469	FASTKD3
novel_circ_002217	FASTKD3
novel_circ_004067	FASTKD3
novel_circ_003627	FASTKD3
novel_circ_001459	FASTKD3
novel_circ_000493	FASTKD3
novel_circ_002187	FASTKD3
novel_circ_000157	FASTKD3
novel_circ_001549	FASTKD3
novel_circ_001853	FASTKD3
novel_circ_002764	FASTKD3
novel_circ_001068	FASTKD3
novel_circ_001267	FASTKD3
novel_circ_003020	FASTKD3
novel_circ_003014	FASTKD3
novel_circ_001323	FASTKD3
novel_circ_001243	FASTKD3
novel_circ_001482	FASTKD3
novel_circ_000246	FASTKD3
novel_circ_000696	FASTKD3
novel_circ_003355	FASTKD3
novel_circ_000224	FASTKD3
novel_circ_000980	FASTKD3
novel_circ_002631	FASTKD3
novel_circ_000597	FASTKD3
novel_circ_003401	FASTKD3
novel_circ_001049	FASTKD3
novel_circ_003707	FASTKD3
novel_circ_001945	FASTKD3
novel_circ_004338	FASTKD3
novel_circ_003199	FASTKD3
novel_circ_000408	FASTKD3
novel_circ_002459	FASTKD3
novel_circ_003292	FASTKD3
novel_circ_003262	FASTKD3
novel_circ_004328	FASTKD3
novel_circ_002194	FASTKD3
novel_circ_003170	FASTKD3
novel_circ_001990	FASTKD3
novel_circ_000876	FASTKD3
novel_circ_003951	FASTKD3
novel_circ_003156	FASTKD3
novel_circ_002876	FASTKD3
novel_circ_002379	FASTKD3
novel_circ_000720	FASTKD3
novel_circ_004280	FASTKD3
novel_circ_001814	FASTKD3
novel_circ_000933	FASTKD3
novel_circ_000685	FASTKD3
novel_circ_001344	FASTKD3
novel_circ_000259	FASTKD3
novel_circ_001165	FASTKD3
novel_circ_003130	FASTKD3
novel_circ_001209	FASTKD3
novel_circ_002466	FASTKD3
novel_circ_000232	FASTKD3
novel_circ_002533	FASTKD3
novel_circ_001533	FASTKD3
novel_circ_000848	FASTKD3
novel_circ_001046	FASTKD3
novel_circ_000704	FASTKD3
novel_circ_000201	FASTKD3
novel_circ_002958	FASTKD3
novel_circ_003178	FASTKD3
novel_circ_001245	FASTKD3
novel_circ_001318	FASTKD3
novel_circ_000987	FASTKD3
novel_circ_000866	FASTKD3
novel_circ_002262	FASTKD3
novel_circ_003635	FASTKD3
novel_circ_002263	FASTKD3
novel_circ_001435	FASTKD3
novel_circ_000627	FASTKD3
novel_circ_004320	FASTKD3
novel_circ_001112	FASTKD3
novel_circ_000844	FASTKD3
novel_circ_001338	FASTKD3
novel_circ_004044	FASTKD3
novel_circ_001300	FASTKD3
novel_circ_002715	FASTKD3
novel_circ_003284	FASTKD3
novel_circ_000660	FASTKD3
novel_circ_001900	FASTKD3
novel_circ_003958	FASTKD3
novel_circ_001980	FASTKD3
novel_circ_003236	FASTKD3
novel_circ_001457	FASTKD3
novel_circ_003155	FASTKD3
novel_circ_002477	FASTKD3
novel_circ_002440	FASTKD3
novel_circ_004321	FASTKD3
novel_circ_002587	FASTKD3
novel_circ_003024	FASTKD3
novel_circ_002790	FASTKD3
novel_circ_001256	FASTKD3
novel_circ_001886	FASTKD3
novel_circ_003040	FASTKD3
novel_circ_002670	FASTKD3
novel_circ_003608	FASTKD3
novel_circ_002480	FASTKD3
novel_circ_003595	FASTKD3
novel_circ_001669	FASTKD3
novel_circ_002475	FASTKD3
novel_circ_002424	FASTKD3
novel_circ_004326	FASTKD3
novel_circ_003591	FASTKD3
novel_circ_000227	FASTKD3
novel_circ_003400	FASTKD3
novel_circ_004264	FASTKD3
novel_circ_000239	FASTKD3
novel_circ_002632	FASTKD3
novel_circ_002965	FASTKD3
novel_circ_000237	FASTKD3
novel_circ_001681	FASTKD3
novel_circ_003305	FASTKD3
novel_circ_000181	FASTKD3
novel_circ_003752	FASTKD3
novel_circ_002385	FASTKD3
novel_circ_002584	FASTKD3
novel_circ_002745	FASTKD3
novel_circ_001806	FASTKD3
novel_circ_002834	FASTKD3
novel_circ_001229	FASTKD3
novel_circ_003863	GFM2
novel_circ_000011	GFM2
novel_circ_002538	GFM2
novel_circ_002840	GFM2
novel_circ_001771	GFM2
novel_circ_000847	GFM2
novel_circ_002511	GFM2
novel_circ_001469	GFM2
novel_circ_002217	GFM2
novel_circ_004067	GFM2
novel_circ_000493	GFM2
novel_circ_003627	GFM2
novel_circ_001459	GFM2
novel_circ_002187	GFM2
novel_circ_001549	GFM2
novel_circ_000157	GFM2
novel_circ_002764	GFM2
novel_circ_001853	GFM2
novel_circ_001068	GFM2
novel_circ_001267	GFM2
novel_circ_003014	GFM2
novel_circ_001323	GFM2
novel_circ_003020	GFM2
novel_circ_003355	GFM2
novel_circ_000980	GFM2
novel_circ_000246	GFM2
novel_circ_001243	GFM2
novel_circ_000224	GFM2
novel_circ_000696	GFM2
novel_circ_001482	GFM2
novel_circ_002631	GFM2
novel_circ_000597	GFM2
novel_circ_001945	GFM2
novel_circ_002459	GFM2
novel_circ_004338	GFM2
novel_circ_003401	GFM2
novel_circ_003707	GFM2
novel_circ_003199	GFM2
novel_circ_001049	GFM2
novel_circ_003292	GFM2
novel_circ_000408	GFM2
novel_circ_003262	GFM2
novel_circ_003170	GFM2
novel_circ_004328	GFM2
novel_circ_001990	GFM2
novel_circ_002876	GFM2
novel_circ_000876	GFM2
novel_circ_003951	GFM2
novel_circ_002194	GFM2
novel_circ_003156	GFM2
novel_circ_000720	GFM2
novel_circ_004280	GFM2
novel_circ_000685	GFM2
novel_circ_001814	GFM2
novel_circ_001344	GFM2
novel_circ_002379	GFM2
novel_circ_000933	GFM2
novel_circ_000259	GFM2
novel_circ_003130	GFM2
novel_circ_001209	GFM2
novel_circ_001165	GFM2
novel_circ_000848	GFM2
novel_circ_002533	GFM2
novel_circ_001533	GFM2
novel_circ_002466	GFM2
novel_circ_000232	GFM2
novel_circ_000201	GFM2
novel_circ_000704	GFM2
novel_circ_001046	GFM2
novel_circ_002958	GFM2
novel_circ_001245	GFM2
novel_circ_003178	GFM2
novel_circ_001318	GFM2
novel_circ_000987	GFM2
novel_circ_000866	GFM2
novel_circ_002262	GFM2
novel_circ_002263	GFM2
novel_circ_003635	GFM2
novel_circ_001435	GFM2
novel_circ_004320	GFM2
novel_circ_000627	GFM2
novel_circ_001112	GFM2
novel_circ_000844	GFM2
novel_circ_001300	GFM2
novel_circ_001338	GFM2
novel_circ_000660	GFM2
novel_circ_003284	GFM2
novel_circ_002715	GFM2
novel_circ_004044	GFM2
novel_circ_001900	GFM2
novel_circ_003958	GFM2
novel_circ_001980	GFM2
novel_circ_004264	GFM2
novel_circ_003236	GFM2
novel_circ_001457	GFM2
novel_circ_002440	GFM2
novel_circ_002477	GFM2
novel_circ_003155	GFM2
novel_circ_002587	GFM2
novel_circ_004321	GFM2
novel_circ_003024	GFM2
novel_circ_001886	GFM2
novel_circ_002790	GFM2
novel_circ_001043	GFM2
novel_circ_003040	GFM2
novel_circ_004326	GFM2
novel_circ_001256	GFM2
novel_circ_002670	GFM2
novel_circ_003608	GFM2
novel_circ_003595	GFM2
novel_circ_002480	GFM2
novel_circ_001669	GFM2
novel_circ_000227	GFM2
novel_circ_002475	GFM2
novel_circ_003591	GFM2
novel_circ_002424	GFM2
novel_circ_003400	GFM2
novel_circ_001229	GFM2
novel_circ_000239	GFM2
novel_circ_002834	GFM2
novel_circ_002965	GFM2
novel_circ_002632	GFM2
novel_circ_003752	GFM2
novel_circ_000237	GFM2
novel_circ_002867	GFM2
novel_circ_001681	GFM2
novel_circ_000016	GFM2
novel_circ_003305	GFM2
novel_circ_000181	GFM2
novel_circ_002584	GFM2
novel_circ_002385	GFM2
novel_circ_002745	GFM2
novel_circ_001806	GFM2
novel_circ_000928	GFM2
novel_circ_000011	UBA1
novel_circ_002538	UBA1
novel_circ_002840	UBA1
novel_circ_003863	UBA1
novel_circ_001771	UBA1
novel_circ_002511	UBA1
novel_circ_000847	UBA1
novel_circ_001469	UBA1
novel_circ_002217	UBA1
novel_circ_004067	UBA1
novel_circ_003627	UBA1
novel_circ_000493	UBA1
novel_circ_001459	UBA1
novel_circ_002187	UBA1
novel_circ_001549	UBA1
novel_circ_000157	UBA1
novel_circ_001853	UBA1
novel_circ_001068	UBA1
novel_circ_002764	UBA1
novel_circ_001267	UBA1
novel_circ_001323	UBA1
novel_circ_003020	UBA1
novel_circ_003014	UBA1
novel_circ_003355	UBA1
novel_circ_000246	UBA1
novel_circ_000980	UBA1
novel_circ_001243	UBA1
novel_circ_001482	UBA1
novel_circ_000224	UBA1
novel_circ_000696	UBA1
novel_circ_002631	UBA1
novel_circ_000597	UBA1
novel_circ_001945	UBA1
novel_circ_003401	UBA1
novel_circ_002459	UBA1
novel_circ_003707	UBA1
novel_circ_000408	UBA1
novel_circ_004338	UBA1
novel_circ_001049	UBA1
novel_circ_003292	UBA1
novel_circ_003199	UBA1
novel_circ_003262	UBA1
novel_circ_004328	UBA1
novel_circ_003170	UBA1
novel_circ_002194	UBA1
novel_circ_002876	UBA1
novel_circ_000876	UBA1
novel_circ_001990	UBA1
novel_circ_003156	UBA1
novel_circ_003951	UBA1
novel_circ_000720	UBA1
novel_circ_004280	UBA1
novel_circ_001814	UBA1
novel_circ_002379	UBA1
novel_circ_001344	UBA1
novel_circ_000685	UBA1
novel_circ_000933	UBA1
novel_circ_001165	UBA1
novel_circ_000259	UBA1
novel_circ_003130	UBA1
novel_circ_001209	UBA1
novel_circ_002533	UBA1
novel_circ_000848	UBA1
novel_circ_002466	UBA1
novel_circ_001533	UBA1
novel_circ_000232	UBA1
novel_circ_001046	UBA1
novel_circ_000704	UBA1
novel_circ_000201	UBA1
novel_circ_002958	UBA1
novel_circ_003178	UBA1
novel_circ_001245	UBA1
novel_circ_001318	UBA1
novel_circ_000866	UBA1
novel_circ_000987	UBA1
novel_circ_002262	UBA1
novel_circ_002263	UBA1
novel_circ_003635	UBA1
novel_circ_001435	UBA1
novel_circ_000627	UBA1
novel_circ_004320	UBA1
novel_circ_001112	UBA1
novel_circ_000844	UBA1
novel_circ_001338	UBA1
novel_circ_004044	UBA1
novel_circ_001300	UBA1
novel_circ_003284	UBA1
novel_circ_000660	UBA1
novel_circ_002715	UBA1
novel_circ_001900	UBA1
novel_circ_003958	UBA1
novel_circ_001980	UBA1
novel_circ_003236	UBA1
novel_circ_001457	UBA1
novel_circ_003155	UBA1
novel_circ_002440	UBA1
novel_circ_002477	UBA1
novel_circ_002587	UBA1
novel_circ_004321	UBA1
novel_circ_003024	UBA1
novel_circ_001886	UBA1
novel_circ_001256	UBA1
novel_circ_002790	UBA1
novel_circ_003040	UBA1
novel_circ_002670	UBA1
novel_circ_003608	UBA1
novel_circ_003595	UBA1
novel_circ_002480	UBA1
novel_circ_001669	UBA1
novel_circ_002475	UBA1
novel_circ_003591	UBA1
novel_circ_002424	UBA1
novel_circ_004326	UBA1
novel_circ_000227	UBA1
novel_circ_003400	UBA1
novel_circ_004264	UBA1
novel_circ_000239	UBA1
novel_circ_002965	UBA1
novel_circ_002632	UBA1
novel_circ_000237	UBA1
novel_circ_003752	UBA1
novel_circ_002834	UBA1
novel_circ_001681	UBA1
novel_circ_003305	UBA1
novel_circ_000181	UBA1
novel_circ_002584	UBA1
novel_circ_002745	UBA1
novel_circ_002385	UBA1
novel_circ_001806	UBA1
novel_circ_001229	UBA1
novel_circ_000016	UBA1
novel_circ_003863	PC
novel_circ_000847	PC
novel_circ_000011	PC
novel_circ_002538	PC
novel_circ_002840	PC
novel_circ_001771	PC
novel_circ_001469	PC
novel_circ_002511	PC
novel_circ_002217	PC
novel_circ_003627	PC
novel_circ_004067	PC
novel_circ_001459	PC
novel_circ_000493	PC
novel_circ_001549	PC
novel_circ_002187	PC
novel_circ_001323	PC
novel_circ_001068	PC
novel_circ_000157	PC
novel_circ_001853	PC
novel_circ_002631	PC
novel_circ_002764	PC
novel_circ_003020	PC
novel_circ_000246	PC
novel_circ_003355	PC
novel_circ_000696	PC
novel_circ_001945	PC
novel_circ_001267	PC
novel_circ_000597	PC
novel_circ_001482	PC
novel_circ_001243	PC
novel_circ_002459	PC
novel_circ_000408	PC
novel_circ_000980	PC
novel_circ_003262	PC
novel_circ_000224	PC
novel_circ_003014	PC
novel_circ_003199	PC
novel_circ_001049	PC
novel_circ_003156	PC
novel_circ_003292	PC
novel_circ_003707	PC
novel_circ_003401	PC
novel_circ_002194	PC
novel_circ_000720	PC
novel_circ_003170	PC
novel_circ_004338	PC
novel_circ_004280	PC
novel_circ_004328	PC
novel_circ_001814	PC
novel_circ_002876	PC
novel_circ_000876	PC
novel_circ_000933	PC
novel_circ_000685	PC
novel_circ_000848	PC
novel_circ_003951	PC
novel_circ_001165	PC
novel_circ_002379	PC
novel_circ_001344	PC
novel_circ_001990	PC
novel_circ_000259	PC
novel_circ_002466	PC
novel_circ_003130	PC
novel_circ_001046	PC
novel_circ_002533	PC
novel_circ_001209	PC
novel_circ_001533	PC
novel_circ_000201	PC
novel_circ_001300	PC
novel_circ_000232	PC
novel_circ_000704	PC
novel_circ_000987	PC
novel_circ_001245	PC
novel_circ_002958	PC
novel_circ_002262	PC
novel_circ_002263	PC
novel_circ_000866	PC
novel_circ_001318	PC
novel_circ_000627	PC
novel_circ_003178	PC
novel_circ_003635	PC
novel_circ_004320	PC
novel_circ_001435	PC
novel_circ_001338	PC
novel_circ_001112	PC
novel_circ_004044	PC
novel_circ_000844	PC
novel_circ_003284	PC
novel_circ_001900	PC
novel_circ_000660	PC
novel_circ_001980	PC
novel_circ_003958	PC
novel_circ_001457	PC
novel_circ_002715	PC
novel_circ_002440	PC
novel_circ_003236	PC
novel_circ_003155	PC
novel_circ_003024	PC
novel_circ_004321	PC
novel_circ_002477	PC
novel_circ_002587	PC
novel_circ_002790	PC
novel_circ_001886	PC
novel_circ_003040	PC
novel_circ_001043	PC
novel_circ_002670	PC
novel_circ_001256	PC
novel_circ_004264	PC
novel_circ_003595	PC
novel_circ_002475	PC
novel_circ_002480	PC
novel_circ_003608	PC
novel_circ_003591	PC
novel_circ_001669	PC
novel_circ_003752	PC
novel_circ_000227	PC
novel_circ_003400	PC
novel_circ_002424	PC
novel_circ_002965	PC
novel_circ_000239	PC
novel_circ_004326	PC
novel_circ_002632	PC
novel_circ_000237	PC
novel_circ_001229	PC
novel_circ_003305	PC
novel_circ_001681	PC
novel_circ_000181	PC
novel_circ_002584	PC
novel_circ_002867	PC
novel_circ_000016	PC
novel_circ_000928	PC
novel_circ_002745	PC
novel_circ_002385	PC
novel_circ_002834	PC
novel_circ_001806	PC
novel_circ_003863	HSPA9
novel_circ_000847	HSPA9
novel_circ_000011	HSPA9
novel_circ_002538	HSPA9
novel_circ_002511	HSPA9
novel_circ_002840	HSPA9
novel_circ_001771	HSPA9
novel_circ_001469	HSPA9
novel_circ_002217	HSPA9
novel_circ_004067	HSPA9
novel_circ_000493	HSPA9
novel_circ_003627	HSPA9
novel_circ_001459	HSPA9
novel_circ_002187	HSPA9
novel_circ_001549	HSPA9
novel_circ_000157	HSPA9
novel_circ_002764	HSPA9
novel_circ_003014	HSPA9
novel_circ_001853	HSPA9
novel_circ_001267	HSPA9
novel_circ_001068	HSPA9
novel_circ_003020	HSPA9
novel_circ_001243	HSPA9
novel_circ_000224	HSPA9
novel_circ_001323	HSPA9
novel_circ_003355	HSPA9
novel_circ_001482	HSPA9
novel_circ_000246	HSPA9
novel_circ_000980	HSPA9
novel_circ_000696	HSPA9
novel_circ_003401	HSPA9
novel_circ_000597	HSPA9
novel_circ_004338	HSPA9
novel_circ_003707	HSPA9
novel_circ_003199	HSPA9
novel_circ_001049	HSPA9
novel_circ_002631	HSPA9
novel_circ_001945	HSPA9
novel_circ_003292	HSPA9
novel_circ_000408	HSPA9
novel_circ_002459	HSPA9
novel_circ_001990	HSPA9
novel_circ_003262	HSPA9
novel_circ_004328	HSPA9
novel_circ_002194	HSPA9
novel_circ_003170	HSPA9
novel_circ_002876	HSPA9
novel_circ_000876	HSPA9
novel_circ_003951	HSPA9
novel_circ_003156	HSPA9
novel_circ_000720	HSPA9
novel_circ_000685	HSPA9
novel_circ_002379	HSPA9
novel_circ_004280	HSPA9
novel_circ_001344	HSPA9
novel_circ_001814	HSPA9
novel_circ_000259	HSPA9
novel_circ_003130	HSPA9
novel_circ_001209	HSPA9
novel_circ_000933	HSPA9
novel_circ_000232	HSPA9
novel_circ_001533	HSPA9
novel_circ_002533	HSPA9
novel_circ_001165	HSPA9
novel_circ_002466	HSPA9
novel_circ_000848	HSPA9
novel_circ_000704	HSPA9
novel_circ_001046	HSPA9
novel_circ_000201	HSPA9
novel_circ_003178	HSPA9
novel_circ_002958	HSPA9
novel_circ_001245	HSPA9
novel_circ_001318	HSPA9
novel_circ_000987	HSPA9
novel_circ_003635	HSPA9
novel_circ_000866	HSPA9
novel_circ_002262	HSPA9
novel_circ_002263	HSPA9
novel_circ_001435	HSPA9
novel_circ_004320	HSPA9
novel_circ_000627	HSPA9
novel_circ_000844	HSPA9
novel_circ_001112	HSPA9
novel_circ_001300	HSPA9
novel_circ_001338	HSPA9
novel_circ_002715	HSPA9
novel_circ_003958	HSPA9
novel_circ_003284	HSPA9
novel_circ_001900	HSPA9
novel_circ_000660	HSPA9
novel_circ_004044	HSPA9
novel_circ_001980	HSPA9
novel_circ_003236	HSPA9
novel_circ_002477	HSPA9
novel_circ_003155	HSPA9
novel_circ_002587	HSPA9
novel_circ_001457	HSPA9
novel_circ_004321	HSPA9
novel_circ_002440	HSPA9
novel_circ_003024	HSPA9
novel_circ_004264	HSPA9
novel_circ_002790	HSPA9
novel_circ_001886	HSPA9
novel_circ_001256	HSPA9
novel_circ_003040	HSPA9
novel_circ_002670	HSPA9
novel_circ_004326	HSPA9
novel_circ_003608	HSPA9
novel_circ_003595	HSPA9
novel_circ_002480	HSPA9
novel_circ_001669	HSPA9
novel_circ_000227	HSPA9
novel_circ_002424	HSPA9
novel_circ_002475	HSPA9
novel_circ_003591	HSPA9
novel_circ_003400	HSPA9
novel_circ_002834	HSPA9
novel_circ_000239	HSPA9
novel_circ_002632	HSPA9
novel_circ_000237	HSPA9
novel_circ_002965	HSPA9
novel_circ_001681	HSPA9
novel_circ_003752	HSPA9
novel_circ_001229	HSPA9
novel_circ_003305	HSPA9
novel_circ_000181	HSPA9
novel_circ_000016	HSPA9
novel_circ_002867	HSPA9
novel_circ_002385	HSPA9
novel_circ_000928	HSPA9
novel_circ_002584	HSPA9
novel_circ_002745	HSPA9
novel_circ_001806	HSPA9
novel_circ_001043	HSPA9
novel_circ_001086	MRPL11
novel_circ_002368	MRPL11
novel_circ_003929	MRPL11
novel_circ_003307	MRPL11
novel_circ_002715	MRPL11
novel_circ_003178	MRPL11
novel_circ_001449	MRPL11
novel_circ_002475	MRPL11
novel_circ_001435	MRPL11
novel_circ_002790	MRPL11
novel_circ_000084	MRPL11
novel_circ_002670	MRPL11
novel_circ_001806	MRPL11
novel_circ_000237	MRPL11
novel_circ_001681	MRPL11
novel_circ_002477	MRPL11
novel_circ_002263	MRPL11
novel_circ_004280	MRPL11
novel_circ_001256	MRPL11
novel_circ_002385	MRPL11
novel_circ_000704	MRPL11
novel_circ_003155	MRPL11
novel_circ_002745	MRPL11
novel_circ_001669	MRPL11
novel_circ_004264	MRPL11
novel_circ_003040	MRPL11
novel_circ_002584	MRPL11
novel_circ_004321	MRPL11
novel_circ_000980	MRPL11
novel_circ_000720	MRPL11
novel_circ_001482	MRPL11
novel_circ_000847	MRPL11
novel_circ_000876	MRPL11
novel_circ_003608	MRPL11
novel_circ_002424	MRPL11
novel_circ_001318	MRPL11
novel_circ_000848	MRPL11
novel_circ_003236	MRPL11
novel_circ_003111	MRPL11
novel_circ_001209	MRPL11
novel_circ_002631	MRPL11
novel_circ_003130	MRPL11
novel_circ_003305	MRPL11
novel_circ_001267	MRPL11
novel_circ_004320	MRPL11
novel_circ_001112	MRPL11
novel_circ_000227	MRPL11
novel_circ_002533	MRPL11
novel_circ_000866	MRPL11
novel_circ_003400	MRPL11
novel_circ_003284	MRPL11
novel_circ_002440	MRPL11
novel_circ_003156	MRPL11
novel_circ_000246	MRPL11
novel_circ_003024	MRPL11
novel_circ_003627	MRPL11
novel_circ_004328	MRPL11
novel_circ_002764	MRPL11
novel_circ_003863	MRPL11
novel_circ_002187	MRPL11
novel_circ_001068	MRPL11
novel_circ_003262	MRPL11
novel_circ_001945	MRPL11
novel_circ_004326	MRPL11
novel_circ_003401	MRPL11
novel_circ_003635	MRPL11
novel_circ_004338	MRPL11
novel_circ_000987	MRPL11
novel_circ_001990	MRPL11
novel_circ_001049	MRPL11
novel_circ_001814	MRPL11
novel_circ_000239	MRPL11
novel_circ_001457	MRPL11
novel_circ_001980	MRPL11
novel_circ_002965	MRPL11
novel_circ_000181	MRPL11
novel_circ_003595	MRPL11
novel_circ_001046	MRPL11
novel_circ_003958	MRPL11
novel_circ_000493	MRPL11
novel_circ_001900	MRPL11
novel_circ_003355	MRPL11
novel_circ_001886	MRPL11
novel_circ_001338	MRPL11
novel_circ_000201	MRPL11
novel_circ_000408	MRPL11
novel_circ_004044	MRPL11
novel_circ_001549	MRPL11
novel_circ_000844	MRPL11
novel_circ_003591	MRPL11
novel_circ_001245	MRPL11
novel_circ_000685	MRPL11
novel_circ_000696	MRPL11
novel_circ_002480	MRPL11
novel_circ_000660	MRPL11
novel_circ_001300	MRPL11
novel_circ_003014	MRPL11
novel_circ_000597	MRPL11
novel_circ_001086	RIDA
novel_circ_002368	RIDA
novel_circ_003929	RIDA
novel_circ_003307	RIDA
novel_circ_002715	RIDA
novel_circ_003178	RIDA
novel_circ_001449	RIDA
novel_circ_002475	RIDA
novel_circ_002790	RIDA
novel_circ_001435	RIDA
novel_circ_000084	RIDA
novel_circ_002670	RIDA
novel_circ_001806	RIDA
novel_circ_002477	RIDA
novel_circ_001681	RIDA
novel_circ_004264	RIDA
novel_circ_002263	RIDA
novel_circ_000237	RIDA
novel_circ_004280	RIDA
novel_circ_001256	RIDA
novel_circ_002385	RIDA
novel_circ_003155	RIDA
novel_circ_000704	RIDA
novel_circ_002745	RIDA
novel_circ_001669	RIDA
novel_circ_003040	RIDA
novel_circ_002584	RIDA
novel_circ_001043	RIDA
novel_circ_000720	RIDA
novel_circ_004321	RIDA
novel_circ_000980	RIDA
novel_circ_001482	RIDA
novel_circ_002424	RIDA
novel_circ_000847	RIDA
novel_circ_000876	RIDA
novel_circ_003130	RIDA
novel_circ_003608	RIDA
novel_circ_001209	RIDA
novel_circ_001318	RIDA
novel_circ_000848	RIDA
novel_circ_002631	RIDA
novel_circ_003111	RIDA
novel_circ_003236	RIDA
novel_circ_003305	RIDA
novel_circ_001267	RIDA
novel_circ_004320	RIDA
novel_circ_001112	RIDA
novel_circ_000227	RIDA
novel_circ_004326	RIDA
novel_circ_000866	RIDA
novel_circ_002533	RIDA
novel_circ_003156	RIDA
novel_circ_003284	RIDA
novel_circ_003400	RIDA
novel_circ_000246	RIDA
novel_circ_002440	RIDA
novel_circ_002764	RIDA
novel_circ_003627	RIDA
novel_circ_003024	RIDA
novel_circ_002187	RIDA
novel_circ_004328	RIDA
novel_circ_001068	RIDA
novel_circ_001945	RIDA
novel_circ_003262	RIDA
novel_circ_003863	RIDA
novel_circ_003401	RIDA
novel_circ_002965	RIDA
novel_circ_000987	RIDA
novel_circ_003635	RIDA
novel_circ_001990	RIDA
novel_circ_004338	RIDA
novel_circ_000239	RIDA
novel_circ_001457	RIDA
novel_circ_001814	RIDA
novel_circ_001980	RIDA
novel_circ_000181	RIDA
novel_circ_000685	RIDA
novel_circ_003595	RIDA
novel_circ_003355	RIDA
novel_circ_001049	RIDA
novel_circ_001046	RIDA
novel_circ_001900	RIDA
novel_circ_003958	RIDA
novel_circ_000201	RIDA
novel_circ_000493	RIDA
novel_circ_000408	RIDA
novel_circ_001549	RIDA
novel_circ_001886	RIDA
novel_circ_001338	RIDA
novel_circ_001245	RIDA
novel_circ_004044	RIDA
novel_circ_000696	RIDA
novel_circ_002480	RIDA
novel_circ_003014	RIDA
novel_circ_000660	RIDA
novel_circ_000597	RIDA
novel_circ_003591	RIDA
novel_circ_000844	RIDA
novel_circ_001086	GATC
novel_circ_002368	GATC
novel_circ_003929	GATC
novel_circ_003307	GATC
novel_circ_002715	GATC
novel_circ_003178	GATC
novel_circ_001449	GATC
novel_circ_002475	GATC
novel_circ_002790	GATC
novel_circ_001435	GATC
novel_circ_000084	GATC
novel_circ_002670	GATC
novel_circ_001806	GATC
novel_circ_002477	GATC
novel_circ_001681	GATC
novel_circ_001256	GATC
novel_circ_002263	GATC
novel_circ_000237	GATC
novel_circ_004280	GATC
novel_circ_002385	GATC
novel_circ_003155	GATC
novel_circ_000704	GATC
novel_circ_002745	GATC
novel_circ_004264	GATC
novel_circ_001669	GATC
novel_circ_003040	GATC
novel_circ_002584	GATC
novel_circ_004321	GATC
novel_circ_000980	GATC
novel_circ_000720	GATC
novel_circ_001482	GATC
novel_circ_000847	GATC
novel_circ_002424	GATC
novel_circ_000876	GATC
novel_circ_003608	GATC
novel_circ_003130	GATC
novel_circ_001209	GATC
novel_circ_001318	GATC
novel_circ_000848	GATC
novel_circ_003111	GATC
novel_circ_002631	GATC
novel_circ_003236	GATC
novel_circ_001043	GATC
novel_circ_003305	GATC
novel_circ_001267	GATC
novel_circ_004320	GATC
novel_circ_001112	GATC
novel_circ_000227	GATC
novel_circ_000866	GATC
novel_circ_002533	GATC
novel_circ_003284	GATC
novel_circ_003400	GATC
novel_circ_003156	GATC
novel_circ_004326	GATC
novel_circ_000246	GATC
novel_circ_002440	GATC
novel_circ_002764	GATC
novel_circ_003627	GATC
novel_circ_003024	GATC
novel_circ_004328	GATC
novel_circ_002187	GATC
novel_circ_001068	GATC
novel_circ_003863	GATC
novel_circ_001945	GATC
novel_circ_003262	GATC
novel_circ_003401	GATC
novel_circ_003635	GATC
novel_circ_001990	GATC
novel_circ_002965	GATC
novel_circ_000987	GATC
novel_circ_004338	GATC
novel_circ_000239	GATC
novel_circ_001457	GATC
novel_circ_001814	GATC
novel_circ_000181	GATC
novel_circ_001980	GATC
novel_circ_003595	GATC
novel_circ_001046	GATC
novel_circ_001049	GATC
novel_circ_003355	GATC
novel_circ_001900	GATC
novel_circ_000685	GATC
novel_circ_003958	GATC
novel_circ_000493	GATC
novel_circ_000201	GATC
novel_circ_000408	GATC
novel_circ_001549	GATC
novel_circ_001338	GATC
novel_circ_001886	GATC
novel_circ_001245	GATC
novel_circ_004044	GATC
novel_circ_002480	GATC
novel_circ_000696	GATC
novel_circ_000660	GATC
novel_circ_003014	GATC
novel_circ_003591	GATC
novel_circ_000844	GATC
novel_circ_000597	GATC
novel_circ_000011	DNA2
novel_circ_002538	DNA2
novel_circ_002840	DNA2
novel_circ_003863	DNA2
novel_circ_001771	DNA2
novel_circ_002511	DNA2
novel_circ_001469	DNA2
novel_circ_000847	DNA2
novel_circ_002217	DNA2
novel_circ_004067	DNA2
novel_circ_001043	DNA2
novel_circ_000493	DNA2
novel_circ_003627	DNA2
novel_circ_002187	DNA2
novel_circ_001459	DNA2
novel_circ_003014	DNA2
novel_circ_000157	DNA2
novel_circ_001549	DNA2
novel_circ_002764	DNA2
novel_circ_001267	DNA2
novel_circ_001853	DNA2
novel_circ_001243	DNA2
novel_circ_003020	DNA2
novel_circ_000224	DNA2
novel_circ_001068	DNA2
novel_circ_000980	DNA2
novel_circ_003355	DNA2
novel_circ_003401	DNA2
novel_circ_000246	DNA2
novel_circ_004338	DNA2
novel_circ_001482	DNA2
novel_circ_003707	DNA2
novel_circ_003292	DNA2
novel_circ_000696	DNA2
novel_circ_001323	DNA2
novel_circ_001049	DNA2
novel_circ_002459	DNA2
novel_circ_002631	DNA2
novel_circ_001990	DNA2
novel_circ_000597	DNA2
novel_circ_004328	DNA2
novel_circ_003199	DNA2
novel_circ_003170	DNA2
novel_circ_003951	DNA2
novel_circ_002194	DNA2
novel_circ_001945	DNA2
novel_circ_003262	DNA2
novel_circ_000408	DNA2
novel_circ_002876	DNA2
novel_circ_002379	DNA2
novel_circ_000876	DNA2
novel_circ_001814	DNA2
novel_circ_003156	DNA2
novel_circ_001209	DNA2
novel_circ_004280	DNA2
novel_circ_000232	DNA2
novel_circ_000259	DNA2
novel_circ_000720	DNA2
novel_circ_001533	DNA2
novel_circ_001344	DNA2
novel_circ_002533	DNA2
novel_circ_003130	DNA2
novel_circ_000685	DNA2
novel_circ_000933	DNA2
novel_circ_002466	DNA2
novel_circ_003178	DNA2
novel_circ_000704	DNA2
novel_circ_002958	DNA2
novel_circ_001165	DNA2
novel_circ_001318	DNA2
novel_circ_000201	DNA2
novel_circ_001046	DNA2
novel_circ_000866	DNA2
novel_circ_003635	DNA2
novel_circ_001245	DNA2
novel_circ_000848	DNA2
novel_circ_001435	DNA2
novel_circ_000987	DNA2
novel_circ_004320	DNA2
novel_circ_000844	DNA2
novel_circ_001112	DNA2
novel_circ_002263	DNA2
novel_circ_000627	DNA2
novel_circ_002262	DNA2
novel_circ_004264	DNA2
novel_circ_002715	DNA2
novel_circ_001338	DNA2
novel_circ_000660	DNA2
novel_circ_003958	DNA2
novel_circ_003236	DNA2
novel_circ_003284	DNA2
novel_circ_001980	DNA2
novel_circ_001900	DNA2
novel_circ_001300	DNA2
novel_circ_004044	DNA2
novel_circ_002477	DNA2
novel_circ_003155	DNA2
novel_circ_002587	DNA2
novel_circ_001457	DNA2
novel_circ_002440	DNA2
novel_circ_004326	DNA2
novel_circ_004321	DNA2
novel_circ_003024	DNA2
novel_circ_001256	DNA2
novel_circ_001886	DNA2
novel_circ_002670	DNA2
novel_circ_002790	DNA2
novel_circ_003608	DNA2
novel_circ_003040	DNA2
novel_circ_001669	DNA2
novel_circ_003595	DNA2
novel_circ_002480	DNA2
novel_circ_002475	DNA2
novel_circ_000227	DNA2
novel_circ_002424	DNA2
novel_circ_003591	DNA2
novel_circ_001229	DNA2
novel_circ_002834	DNA2
novel_circ_003400	DNA2
novel_circ_003752	DNA2
novel_circ_000239	DNA2
novel_circ_000928	DNA2
novel_circ_002632	DNA2
novel_circ_000237	DNA2
novel_circ_001681	DNA2
novel_circ_000016	DNA2
novel_circ_002965	DNA2
novel_circ_002867	DNA2
novel_circ_003305	DNA2
novel_circ_000181	DNA2
novel_circ_001806	DNA2
novel_circ_002584	DNA2
novel_circ_002745	DNA2
novel_circ_002385	DNA2
novel_circ_001086	MRPL42
novel_circ_002368	MRPL42
novel_circ_003929	MRPL42
novel_circ_003307	MRPL42
novel_circ_002715	MRPL42
novel_circ_003178	MRPL42
novel_circ_001449	MRPL42
novel_circ_002475	MRPL42
novel_circ_002790	MRPL42
novel_circ_001435	MRPL42
novel_circ_000084	MRPL42
novel_circ_002670	MRPL42
novel_circ_001806	MRPL42
novel_circ_001681	MRPL42
novel_circ_002477	MRPL42
novel_circ_001256	MRPL42
novel_circ_000237	MRPL42
novel_circ_002263	MRPL42
novel_circ_004280	MRPL42
novel_circ_002385	MRPL42
novel_circ_003155	MRPL42
novel_circ_000704	MRPL42
novel_circ_001669	MRPL42
novel_circ_002745	MRPL42
novel_circ_004264	MRPL42
novel_circ_003040	MRPL42
novel_circ_002584	MRPL42
novel_circ_004321	MRPL42
novel_circ_000980	MRPL42
novel_circ_001482	MRPL42
novel_circ_000720	MRPL42
novel_circ_000847	MRPL42
novel_circ_002424	MRPL42
novel_circ_000876	MRPL42
novel_circ_003608	MRPL42
novel_circ_003111	MRPL42
novel_circ_001318	MRPL42
novel_circ_001209	MRPL42
novel_circ_003130	MRPL42
novel_circ_000848	MRPL42
novel_circ_003236	MRPL42
novel_circ_002631	MRPL42
novel_circ_003305	MRPL42
novel_circ_001267	MRPL42
novel_circ_004320	MRPL42
novel_circ_001112	MRPL42
novel_circ_001043	MRPL42
novel_circ_000227	MRPL42
novel_circ_000866	MRPL42
novel_circ_002533	MRPL42
novel_circ_003284	MRPL42
novel_circ_003400	MRPL42
novel_circ_003156	MRPL42
novel_circ_002440	MRPL42
novel_circ_000246	MRPL42
novel_circ_004326	MRPL42
novel_circ_003627	MRPL42
novel_circ_003024	MRPL42
novel_circ_002764	MRPL42
novel_circ_004328	MRPL42
novel_circ_002187	MRPL42
novel_circ_003863	MRPL42
novel_circ_001068	MRPL42
novel_circ_003262	MRPL42
novel_circ_001945	MRPL42
novel_circ_003401	MRPL42
novel_circ_003635	MRPL42
novel_circ_001990	MRPL42
novel_circ_004338	MRPL42
novel_circ_000987	MRPL42
novel_circ_002965	MRPL42
novel_circ_000239	MRPL42
novel_circ_001814	MRPL42
novel_circ_001457	MRPL42
novel_circ_000181	MRPL42
novel_circ_001980	MRPL42
novel_circ_001046	MRPL42
novel_circ_001049	MRPL42
novel_circ_003595	MRPL42
novel_circ_001900	MRPL42
novel_circ_003958	MRPL42
novel_circ_003355	MRPL42
novel_circ_000493	MRPL42
novel_circ_000201	MRPL42
novel_circ_000685	MRPL42
novel_circ_001338	MRPL42
novel_circ_001886	MRPL42
novel_circ_000408	MRPL42
novel_circ_001549	MRPL42
novel_circ_004044	MRPL42
novel_circ_001245	MRPL42
novel_circ_002480	MRPL42
novel_circ_003591	MRPL42
novel_circ_000660	MRPL42
novel_circ_000844	MRPL42
novel_circ_000696	MRPL42
novel_circ_003014	MRPL42
novel_circ_001086	PTRH2
novel_circ_002368	PTRH2
novel_circ_003929	PTRH2
novel_circ_003307	PTRH2
novel_circ_002715	PTRH2
novel_circ_003178	PTRH2
novel_circ_001449	PTRH2
novel_circ_002475	PTRH2
novel_circ_002790	PTRH2
novel_circ_001435	PTRH2
novel_circ_000084	PTRH2
novel_circ_002670	PTRH2
novel_circ_001806	PTRH2
novel_circ_001681	PTRH2
novel_circ_002263	PTRH2
novel_circ_002477	PTRH2
novel_circ_004280	PTRH2
novel_circ_003155	PTRH2
novel_circ_000237	PTRH2
novel_circ_002385	PTRH2
novel_circ_001256	PTRH2
novel_circ_000704	PTRH2
novel_circ_002745	PTRH2
novel_circ_004264	PTRH2
novel_circ_003040	PTRH2
novel_circ_001669	PTRH2
novel_circ_000720	PTRH2
novel_circ_002584	PTRH2
novel_circ_004321	PTRH2
novel_circ_002424	PTRH2
novel_circ_000980	PTRH2
novel_circ_001482	PTRH2
novel_circ_000847	PTRH2
novel_circ_000876	PTRH2
novel_circ_003130	PTRH2
novel_circ_001318	PTRH2
novel_circ_001209	PTRH2
novel_circ_003608	PTRH2
novel_circ_002631	PTRH2
novel_circ_003236	PTRH2
novel_circ_000848	PTRH2
novel_circ_003305	PTRH2
novel_circ_003111	PTRH2
novel_circ_001267	PTRH2
novel_circ_001112	PTRH2
novel_circ_004320	PTRH2
novel_circ_000227	PTRH2
novel_circ_000866	PTRH2
novel_circ_002533	PTRH2
novel_circ_003156	PTRH2
novel_circ_000246	PTRH2
novel_circ_003400	PTRH2
novel_circ_003284	PTRH2
novel_circ_002764	PTRH2
novel_circ_004326	PTRH2
novel_circ_002440	PTRH2
novel_circ_003627	PTRH2
novel_circ_003024	PTRH2
novel_circ_002187	PTRH2
novel_circ_001068	PTRH2
novel_circ_001945	PTRH2
novel_circ_003262	PTRH2
novel_circ_004328	PTRH2
novel_circ_002965	PTRH2
novel_circ_000987	PTRH2
novel_circ_003401	PTRH2
novel_circ_003863	PTRH2
novel_circ_003635	PTRH2
novel_circ_004338	PTRH2
novel_circ_001990	PTRH2
novel_circ_001814	PTRH2
novel_circ_000239	PTRH2
novel_circ_001980	PTRH2
novel_circ_001457	PTRH2
novel_circ_003595	PTRH2
novel_circ_000685	PTRH2
novel_circ_003355	PTRH2
novel_circ_000181	PTRH2
novel_circ_001049	PTRH2
novel_circ_001043	PTRH2
novel_circ_000408	PTRH2
novel_circ_001886	PTRH2
novel_circ_000201	PTRH2
novel_circ_003958	PTRH2
novel_circ_000493	PTRH2
novel_circ_001046	PTRH2
novel_circ_001900	PTRH2
novel_circ_001549	PTRH2
novel_circ_000696	PTRH2
novel_circ_003014	PTRH2
novel_circ_004044	PTRH2
novel_circ_001245	PTRH2
novel_circ_001338	PTRH2
novel_circ_002480	PTRH2
novel_circ_000597	PTRH2
novel_circ_002262	PTRH2
novel_circ_000660	PTRH2
novel_circ_001086	MRPL22
novel_circ_002368	MRPL22
novel_circ_003307	MRPL22
novel_circ_003929	MRPL22
novel_circ_002715	MRPL22
novel_circ_003178	MRPL22
novel_circ_001449	MRPL22
novel_circ_002475	MRPL22
novel_circ_000084	MRPL22
novel_circ_001435	MRPL22
novel_circ_002790	MRPL22
novel_circ_002670	MRPL22
novel_circ_001681	MRPL22
novel_circ_000237	MRPL22
novel_circ_001806	MRPL22
novel_circ_001256	MRPL22
novel_circ_002477	MRPL22
novel_circ_001669	MRPL22
novel_circ_002263	MRPL22
novel_circ_002385	MRPL22
novel_circ_004280	MRPL22
novel_circ_000704	MRPL22
novel_circ_002745	MRPL22
novel_circ_003155	MRPL22
novel_circ_003040	MRPL22
novel_circ_004321	MRPL22
novel_circ_002584	MRPL22
novel_circ_000980	MRPL22
novel_circ_001482	MRPL22
novel_circ_003608	MRPL22
novel_circ_004264	MRPL22
novel_circ_000720	MRPL22
novel_circ_000847	MRPL22
novel_circ_000876	MRPL22
novel_circ_003111	MRPL22
novel_circ_003236	MRPL22
novel_circ_002424	MRPL22
novel_circ_002631	MRPL22
novel_circ_001318	MRPL22
novel_circ_000848	MRPL22
novel_circ_003305	MRPL22
novel_circ_001267	MRPL22
novel_circ_001112	MRPL22
novel_circ_001209	MRPL22
novel_circ_004320	MRPL22
novel_circ_003130	MRPL22
novel_circ_002533	MRPL22
novel_circ_003400	MRPL22
novel_circ_000227	MRPL22
novel_circ_000866	MRPL22
novel_circ_002440	MRPL22
novel_circ_004328	MRPL22
novel_circ_003284	MRPL22
novel_circ_003024	MRPL22
novel_circ_003156	MRPL22
novel_circ_003863	MRPL22
novel_circ_000246	MRPL22
novel_circ_002764	MRPL22
novel_circ_003627	MRPL22
novel_circ_001068	MRPL22
novel_circ_002187	MRPL22
novel_circ_003262	MRPL22
novel_circ_003401	MRPL22
novel_circ_003635	MRPL22
novel_circ_004338	MRPL22
novel_circ_004326	MRPL22
novel_circ_001945	MRPL22
novel_circ_001814	MRPL22
novel_circ_001049	MRPL22
novel_circ_001046	MRPL22
novel_circ_001990	MRPL22
novel_circ_001457	MRPL22
novel_circ_000181	MRPL22
novel_circ_000239	MRPL22
novel_circ_000987	MRPL22
novel_circ_000493	MRPL22
novel_circ_003958	MRPL22
novel_circ_001980	MRPL22
novel_circ_003595	MRPL22
novel_circ_001900	MRPL22
novel_circ_001338	MRPL22
novel_circ_001886	MRPL22
novel_circ_000844	MRPL22
novel_circ_004044	MRPL22
novel_circ_000201	MRPL22
novel_circ_003591	MRPL22
novel_circ_002965	MRPL22
novel_circ_000011	HSPA5
novel_circ_002538	HSPA5
novel_circ_002840	HSPA5
novel_circ_003863	HSPA5
novel_circ_001771	HSPA5
novel_circ_002511	HSPA5
novel_circ_000847	HSPA5
novel_circ_002217	HSPA5
novel_circ_001469	HSPA5
novel_circ_004067	HSPA5
novel_circ_003014	HSPA5
novel_circ_000493	HSPA5
novel_circ_000157	HSPA5
novel_circ_002187	HSPA5
novel_circ_001459	HSPA5
novel_circ_003627	HSPA5
novel_circ_001267	HSPA5
novel_circ_002764	HSPA5
novel_circ_001549	HSPA5
novel_circ_001853	HSPA5
novel_circ_003401	HSPA5
novel_circ_001243	HSPA5
novel_circ_003020	HSPA5
novel_circ_000224	HSPA5
novel_circ_001068	HSPA5
novel_circ_000980	HSPA5
novel_circ_004338	HSPA5
novel_circ_001482	HSPA5
novel_circ_003707	HSPA5
novel_circ_000246	HSPA5
novel_circ_000696	HSPA5
novel_circ_003355	HSPA5
novel_circ_003292	HSPA5
novel_circ_002631	HSPA5
novel_circ_001049	HSPA5
novel_circ_001990	HSPA5
novel_circ_002459	HSPA5
novel_circ_001323	HSPA5
novel_circ_003199	HSPA5
novel_circ_004328	HSPA5
novel_circ_002194	HSPA5
novel_circ_003170	HSPA5
novel_circ_000232	HSPA5
novel_circ_003951	HSPA5
novel_circ_000597	HSPA5
novel_circ_002379	HSPA5
novel_circ_001043	HSPA5
novel_circ_000876	HSPA5
novel_circ_001209	HSPA5
novel_circ_000408	HSPA5
novel_circ_001814	HSPA5
novel_circ_000259	HSPA5
novel_circ_003262	HSPA5
novel_circ_001533	HSPA5
novel_circ_002876	HSPA5
novel_circ_001945	HSPA5
novel_circ_003156	HSPA5
novel_circ_002533	HSPA5
novel_circ_003178	HSPA5
novel_circ_001344	HSPA5
novel_circ_004280	HSPA5
novel_circ_000720	HSPA5
novel_circ_003130	HSPA5
novel_circ_002466	HSPA5
novel_circ_000933	HSPA5
novel_circ_002958	HSPA5
novel_circ_000704	HSPA5
novel_circ_000685	HSPA5
novel_circ_001318	HSPA5
novel_circ_003635	HSPA5
novel_circ_001046	HSPA5
novel_circ_000201	HSPA5
novel_circ_001165	HSPA5
novel_circ_000866	HSPA5
novel_circ_001245	HSPA5
novel_circ_001435	HSPA5
novel_circ_000844	HSPA5
novel_circ_001112	HSPA5
novel_circ_000987	HSPA5
novel_circ_000627	HSPA5
novel_circ_004320	HSPA5
novel_circ_000848	HSPA5
novel_circ_002715	HSPA5
novel_circ_002262	HSPA5
novel_circ_002263	HSPA5
novel_circ_001338	HSPA5
novel_circ_003236	HSPA5
novel_circ_003958	HSPA5
novel_circ_001980	HSPA5
novel_circ_000660	HSPA5
novel_circ_001300	HSPA5
novel_circ_002477	HSPA5
novel_circ_003284	HSPA5
novel_circ_002587	HSPA5
novel_circ_003155	HSPA5
novel_circ_004044	HSPA5
novel_circ_001256	HSPA5
novel_circ_001900	HSPA5
novel_circ_002790	HSPA5
novel_circ_001457	HSPA5
novel_circ_004321	HSPA5
novel_circ_002670	HSPA5
novel_circ_002440	HSPA5
novel_circ_003024	HSPA5
novel_circ_003608	HSPA5
novel_circ_001886	HSPA5
novel_circ_004326	HSPA5
novel_circ_003040	HSPA5
novel_circ_004264	HSPA5
novel_circ_002480	HSPA5
novel_circ_001669	HSPA5
novel_circ_003595	HSPA5
novel_circ_003591	HSPA5
novel_circ_002424	HSPA5
novel_circ_002475	HSPA5
novel_circ_000227	HSPA5
novel_circ_003400	HSPA5
novel_circ_000239	HSPA5
novel_circ_002834	HSPA5
novel_circ_000237	HSPA5
novel_circ_002632	HSPA5
novel_circ_001681	HSPA5
novel_circ_000181	HSPA5
novel_circ_001229	HSPA5
novel_circ_003305	HSPA5
novel_circ_002965	HSPA5
novel_circ_001086	PARK7
novel_circ_002368	PARK7
novel_circ_003307	PARK7
novel_circ_003929	PARK7
novel_circ_002715	PARK7
novel_circ_003178	PARK7
novel_circ_001449	PARK7
novel_circ_002475	PARK7
novel_circ_001435	PARK7
novel_circ_002790	PARK7
novel_circ_000084	PARK7
novel_circ_002670	PARK7
novel_circ_001806	PARK7
novel_circ_000237	PARK7
novel_circ_001681	PARK7
novel_circ_004264	PARK7
novel_circ_002477	PARK7
novel_circ_004280	PARK7
novel_circ_001256	PARK7
novel_circ_002263	PARK7
novel_circ_003155	PARK7
novel_circ_000704	PARK7
novel_circ_002385	PARK7
novel_circ_002745	PARK7
novel_circ_001669	PARK7
novel_circ_003040	PARK7
novel_circ_002584	PARK7
novel_circ_004321	PARK7
novel_circ_000980	PARK7
novel_circ_000720	PARK7
novel_circ_001482	PARK7
novel_circ_000847	PARK7
novel_circ_000876	PARK7
novel_circ_002424	PARK7
novel_circ_001318	PARK7
novel_circ_003608	PARK7
novel_circ_003236	PARK7
novel_circ_002631	PARK7
novel_circ_003111	PARK7
novel_circ_001209	PARK7
novel_circ_000848	PARK7
novel_circ_001267	PARK7
novel_circ_003130	PARK7
novel_circ_003305	PARK7
novel_circ_001112	PARK7
novel_circ_004320	PARK7
novel_circ_002533	PARK7
novel_circ_000866	PARK7
novel_circ_000227	PARK7
novel_circ_003400	PARK7
novel_circ_003156	PARK7
novel_circ_002440	PARK7
novel_circ_000246	PARK7
novel_circ_003284	PARK7
novel_circ_002764	PARK7
novel_circ_003627	PARK7
novel_circ_003024	PARK7
novel_circ_004328	PARK7
novel_circ_002187	PARK7
novel_circ_001068	PARK7
novel_circ_003262	PARK7
novel_circ_003863	PARK7
novel_circ_003401	PARK7
novel_circ_001945	PARK7
novel_circ_004326	PARK7
novel_circ_003635	PARK7
novel_circ_004338	PARK7
novel_circ_000987	PARK7
novel_circ_001043	PARK7
novel_circ_001990	PARK7
novel_circ_000239	PARK7
novel_circ_001457	PARK7
novel_circ_001049	PARK7
novel_circ_000181	PARK7
novel_circ_002965	PARK7
novel_circ_001980	PARK7
novel_circ_003595	PARK7
novel_circ_001814	PARK7
novel_circ_001046	PARK7
novel_circ_001886	PARK7
novel_circ_003958	PARK7
novel_circ_001086	MRPS18C
novel_circ_002368	MRPS18C
novel_circ_003929	MRPS18C
novel_circ_003307	MRPS18C
novel_circ_002715	MRPS18C
novel_circ_003178	MRPS18C
novel_circ_001449	MRPS18C
novel_circ_002475	MRPS18C
novel_circ_002790	MRPS18C
novel_circ_001435	MRPS18C
novel_circ_000084	MRPS18C
novel_circ_002670	MRPS18C
novel_circ_001806	MRPS18C
novel_circ_003155	MRPS18C
novel_circ_002263	MRPS18C
novel_circ_002385	MRPS18C
novel_circ_004280	MRPS18C
novel_circ_001681	MRPS18C
novel_circ_001256	MRPS18C
novel_circ_002477	MRPS18C
novel_circ_000237	MRPS18C
novel_circ_000704	MRPS18C
[truncated: 3,202 more rows]
