# Supplementary material for: Identification and functional analysis of circular RNAs during mitochondrial damage induced by infectious bovine rhinotracheitis virus infection in Madin–Darby bovine kidney cells
Source: Research Square preprint supplement (doi:10.21203/rs.3.rs-6754910/v1), 2025-06-20
Supplement: Supplementary file 10 [file 8cdaf21a4d93e1d91328098a.xlsx]

## Sheet: Table S4
Table S4：Differentially expressed circRNAs
id	Mock-1_rpm	Mock-2_rpm	Mock-3_rpm	IBRV2-1_rpm	IBRV2-2_rpm	IBRV2-3_rpm
novel_circ_000011	0	0	0	0	1051.89	0
novel_circ_000016	0	0	0	1148.77	0	0
novel_circ_000157	0	0	0	0	0	1083.09
novel_circ_000201	0	418.323	0	957.304	175.316	773.635
novel_circ_000232	0	418.323	464.792	1148.77	876.578	773.635
novel_circ_000239	0	209.161	0	957.304	525.947	0
novel_circ_000259	0	0	0	765.843	350.631	309.454
novel_circ_000408	0	0	0	191.461	525.947	618.908
novel_circ_000493	0	209.161	0	765.843	701.262	618.908
novel_circ_000720	0	836.645	929.584	0	0	154.727
novel_circ_000928	0	0	232.396	382.922	1051.89	0
novel_circ_000933	0	0	0	191.461	350.631	618.908
novel_circ_000987	0	0	0	382.922	350.631	464.181
novel_circ_001046	0	0	0	574.383	350.631	154.727
novel_circ_001049	0	0	0	382.922	1753.16	0
novel_circ_001068	0	209.161	0	191.461	1051.89	309.454
novel_circ_001112	0	0	0	574.383	525.947	0
novel_circ_001165	0	0	0	191.461	701.262	154.727
novel_circ_001209	0	418.323	929.584	0	0	0
novel_circ_001229	0	0	0	765.843	175.316	618.908
novel_circ_001245	0	0	464.792	1148.77	175.316	618.908
novel_circ_001256	0	0	0	0	0	1856.72
novel_circ_001318	0	418.323	0	765.843	525.947	618.908
novel_circ_001323	0	0	0	765.843	0	928.361
novel_circ_001435	0	0	0	765.843	175.316	309.454
novel_circ_001482	0	0	0	0	1051.89	0
novel_circ_001549	0	627.484	697.188	0	0	0
novel_circ_001595	0	0	0	957.304	175.316	0
novel_circ_001771	0	0	0	574.383	175.316	1392.54
novel_circ_001806	0	0	0	957.304	175.316	154.727
novel_circ_001853	0	209.161	0	191.461	350.631	1392.54
novel_circ_001886	0	0	0	0	701.262	618.908
novel_circ_001900	0	0	0	765.843	350.631	0
novel_circ_001980	0	0	0	765.843	0	309.454
novel_circ_002194	0	0	0	1148.77	0	0
novel_circ_002385	0	0	0	574.383	175.316	464.181
novel_circ_002424	0	1254.97	0	0	0	0
novel_circ_002459	0	0	0	1723.15	525.947	0
novel_circ_002475	0	1254.97	0	0	0	0
novel_circ_002480	0	627.484	697.188	0	0	0
novel_circ_002538	0	0	0	0	175.316	928.361
novel_circ_002587	0	209.161	0	957.304	175.316	464.181
novel_circ_002631	0	0	0	765.843	350.631	154.727
novel_circ_002790	0	1254.97	0	0	0	0
novel_circ_002834	0	0	1394.38	0	0	0
novel_circ_002840	0	209.161	0	382.922	0	1083.09
novel_circ_002867	0	0	0	191.461	701.262	464.181
novel_circ_002876	0	0	0	574.383	525.947	0
novel_circ_002965	0	0	0	0	876.578	464.181
novel_circ_003020	0	0	0	382.922	525.947	464.181
novel_circ_003040	0	0	0	957.304	175.316	0
novel_circ_003111	0	0	0	574.383	175.316	309.454
novel_circ_003130	0	0	0	191.461	525.947	464.181
novel_circ_003155	0	209.161	0	957.304	350.631	464.181
novel_circ_003170	0	0	0	574.383	175.316	309.454
novel_circ_003178	0	0	0	957.304	0	309.454
novel_circ_003199	0	0	0	1148.77	0	309.454
novel_circ_003236	0	1254.97	0	0	0	0
novel_circ_003284	0	0	0	574.383	701.262	0
novel_circ_003292	0	0	0	765.843	525.947	0
novel_circ_003307	0	0	0	1148.77	0	154.727
novel_circ_003401	0	0	0	1148.77	0	0
novel_circ_003591	0	627.484	464.792	765.843	1928.47	773.635
novel_circ_003595	0	209.161	232.396	765.843	701.262	464.181
novel_circ_003627	0	1673.29	464.792	382.922	0	0
novel_circ_003752	0	0	464.792	191.461	1928.47	0
novel_circ_003958	0	0	0	382.922	701.262	309.454
novel_circ_004044	0	209.161	0	574.383	350.631	1083.09
novel_circ_004067	0	0	0	0	876.578	309.454
novel_circ_004264	0	0	0	574.383	525.947	0
novel_circ_004320	0	0	0	1148.77	0	0
novel_circ_004321	0	0	0	765.843	350.631	0
novel_circ_004328	0	2509.94	0	191.461	0	0
novel_circ_004338	0	0	0	0	701.262	464.181
novel_circ_000084	210.128	627.484	464.792	957.304	2279.1	1237.82
novel_circ_000246	210.128	209.161	2091.56	0	0	618.908
novel_circ_000627	210.128	209.161	0	1531.69	1051.89	309.454
novel_circ_000685	210.128	1045.81	929.584	382.922	0	0
novel_circ_000847	210.128	836.645	464.792	0	0	154.727
novel_circ_000866	210.128	0	0	191.461	876.578	618.908
novel_circ_000980	210.128	0	232.396	1148.77	525.947	309.454
novel_circ_001243	210.128	836.645	232.396	0	0	0
novel_circ_001814	210.128	209.161	0	0	1227.21	773.635
novel_circ_001990	210.128	0	0	1148.77	175.316	154.727
novel_circ_002217	210.128	836.645	464.792	191.461	0	0
novel_circ_002262	210.128	627.484	464.792	0	0	0
novel_circ_002263	210.128	0	0	1148.77	0	309.454
novel_circ_002368	210.128	0	232.396	574.383	175.316	1083.09
novel_circ_002608	210.128	209.161	0	1340.23	2980.36	1702
novel_circ_003355	210.128	0	0	0	1227.21	309.454
novel_circ_004280	210.128	418.323	697.188	0	0	0
novel_circ_000181	420.256	209.161	0	574.383	876.578	773.635
novel_circ_000224	420.256	209.161	929.584	0	175.316	0
novel_circ_000227	420.256	1045.81	1859.17	574.383	0	154.727
novel_circ_000237	420.256	836.645	929.584	191.461	175.316	0
novel_circ_000660	420.256	1464.13	1626.77	2680.45	1928.47	2166.18
novel_circ_000704	420.256	1254.97	0	0	0	0
novel_circ_001300	420.256	836.645	0	0	0	0
novel_circ_001338	420.256	0	464.792	1723.15	0	1083.09
novel_circ_001457	420.256	418.323	464.792	0	0	0
novel_circ_001681	420.256	1045.81	2323.96	191.461	0	1237.82
novel_circ_001945	420.256	0	1161.98	0	0	154.727
novel_circ_002533	420.256	0	0	957.304	1051.89	928.361
novel_circ_002632	420.256	0	464.792	765.843	1227.21	1083.09
novel_circ_003156	420.256	1045.81	0	0	0	0
novel_circ_003400	420.256	418.323	0	1340.23	876.578	773.635
novel_circ_003608	420.256	836.645	697.188	191.461	0	0
novel_circ_003635	420.256	1464.13	929.584	382.922	0	309.454
novel_circ_000876	630.385	1045.81	232.396	0	175.316	309.454
novel_circ_001449	630.385	0	1394.38	0	0	464.181
novel_circ_001533	630.385	418.323	929.584	0	0	464.181
novel_circ_002466	630.385	1254.97	232.396	191.461	175.316	154.727
novel_circ_002477	630.385	418.323	697.188	0	0	0
novel_circ_002764	630.385	209.161	464.792	0	0	0
novel_circ_003024	630.385	209.161	464.792	0	0	0
novel_circ_003262	630.385	836.645	232.396	0	0	154.727
novel_circ_003929	630.385	418.323	697.188	0	0	0
novel_circ_000696	840.513	209.161	929.584	382.922	0	0
novel_circ_001669	840.513	1673.29	2323.96	574.383	876.578	464.181
novel_circ_003305	840.513	627.484	1161.98	382.922	175.316	309.454
novel_circ_003863	840.513	1673.29	232.396	0	350.631	0
novel_circ_001459	1050.64	836.645	1161.98	0	350.631	154.727
novel_circ_002187	1050.64	1882.45	1859.17	765.843	0	1083.09
novel_circ_002670	1050.64	1464.13	1394.38	574.383	0	928.361
novel_circ_003707	1050.64	836.645	1161.98	2680.45	1928.47	3094.54
novel_circ_000848	1260.77	627.484	1626.77	191.461	175.316	154.727
novel_circ_002715	1260.77	209.161	1161.98	0	525.947	0
novel_circ_002745	1260.77	0	0	0	0	0
novel_circ_001344	1470.9	1254.97	232.396	0	350.631	0
novel_circ_002440	1470.9	627.484	0	191.461	0	309.454
novel_circ_000844	1681.03	0	0	0	0	0
novel_circ_001469	1681.03	1045.81	0	191.461	0	0
novel_circ_002379	1681.03	0	0	0	0	0
novel_circ_002511	1681.03	418.323	0	191.461	0	309.454
novel_circ_002958	1681.03	627.484	929.584	382.922	175.316	464.181
novel_circ_003951	1891.15	1882.45	1626.77	2488.99	3506.31	3094.54
novel_circ_001086	2101.28	0	1161.98	382.922	350.631	154.727
novel_circ_001043	2521.54	2719.1	2323.96	1148.77	876.578	1547.27
novel_circ_001267	2521.54	0	0	0	0	0
novel_circ_003014	2521.54	2719.1	4415.52	1340.23	1227.21	773.635
novel_circ_004326	3151.92	2509.94	3021.15	3829.22	4032.26	6807.98
novel_circ_003867	3572.18	4601.55	1394.38	1723.15	1402.52	2785.08
novel_circ_000597	5883.59	5647.35	6274.69	2871.91	5610.1	3558.72
novel_circ_002584	6513.97	3137.42	3718.34	5552.36	5434.78	7736.35
