# Supplementary material for: Identification and functional analysis of circular RNAs during mitochondrial damage induced by infectious bovine rhinotracheitis virus infection in Madin–Darby bovine kidney cells
Source: Research Square preprint supplement (doi:10.21203/rs.3.rs-6754910/v1), 2025-06-20
Supplement: Supplementary file 11 [file 91f673c3e711b929dd341563.xlsx]

## Sheet: Table S1
Table S1：Identification results of circRNAs
gene_id	source_gene	chr	strand	genomic_start	genomic_end	spliced_length	annot_type	exon.number
novel_circ_000001	ENSBTAG00000011333	22	-	7878952	7888676	441	annot_exons	5
novel_circ_000002	ENSBTAG00000012970	26	-	44283690	44284468	779	one_exon	1
novel_circ_000003	ENSBTAG00000013658	5	+	107846804	107847220	417	one_exon	1
novel_circ_000004	ENSBTAG00000009734	8	-	62888176	62900883	3749	exon_intron
novel_circ_000005	ENSBTAG00000023018	28	-	43935897	43953141	365	annot_exons	4
novel_circ_000006	ENSBTAG00000012852	21	-	59994718	59999442	779	annot_exons	5
novel_circ_000007	ENSBTAG00000008103	8	-	49065997	49069472	350	annot_exons	2
novel_circ_000008	ENSBTAG00000010169	16	+	40064224	40082866	1770	annot_exons	9
novel_circ_000009	ENSBTAG00000027932	11	+	14988282	14999931	514	annot_exons	3
novel_circ_000010	ENSBTAG00000017140	1	-	53319834	53323131	415	annot_exons	3
novel_circ_000011	ENSBTAG00000030801	10	+	72976684	72983216	267	annot_exons	2
novel_circ_000012	ENSBTAG00000009665	9	+	81813565	81816443	2879	exon_intron
novel_circ_000013	ENSBTAG00000018837	19	+	58218055	58260043	527	annot_exons	4
novel_circ_000014	ENSBTAG00000012314	7	+	15561163	15561549	387	one_exon	1
novel_circ_000015	ENSBTAG00000004287	6	-	103413927	103414137	211	one_exon	1
novel_circ_000016	ENSBTAG00000014229	25	-	16750622	16758137	7516	intronic
novel_circ_000017	ENSBTAG00000008025	4	+	118519029	118523934	478	annot_exons	3
novel_circ_000018	ENSBTAG00000019188	6	+	117449063	117454845	647	annot_exons	6
novel_circ_000019	ENSBTAG00000015024	5	+	38563502	38569212	298	annot_exons	2
novel_circ_000020	ENSBTAG00000052708	16	-	55309583	55329864	2139	annot_exons	11
novel_circ_000021	ENSBTAG00000021773	25	+	12835238	12848680	585	annot_exons	3
novel_circ_000022	ENSBTAG00000017124	3	-	34441050	34450123	378	annot_exons	3
novel_circ_000023	ENSBTAG00000013602	1	-	139255975	139257733	395	annot_exons	2
novel_circ_000024	ENSBTAG00000018674	23	-	45417399	45425770	1567	exon_intron
novel_circ_000025	ENSBTAG00000011415	7	-	49860442	49865033	756	annot_exons	5
novel_circ_000026	ENSBTAG00000001692	7	+	61853686	61857125	583	annot_exons	2
novel_circ_000027	ENSBTAG00000020806	5	-	47512150	47516771	1457	annot_exons	3
novel_circ_000028	ENSBTAG00000003719	8	+	62703045	62705645	246	annot_exons	2
novel_circ_000029	ENSBTAG00000019704	1	-	119135868	119136017	150	antisense
novel_circ_000030	ENSBTAG00000052059	14	-	12458977	12550707	15965	exon_intron
novel_circ_000031	ENSBTAG00000026842	2	+	62033228	62039839	573	annot_exons	4
novel_circ_000032	ENSBTAG00000003848	13	-	51632241	51641904	977	annot_exons	6
novel_circ_000033	ENSBTAG00000008293	13	-	47729438	47746248	527	annot_exons	7
novel_circ_000034	ENSBTAG00000032024	9	-	86827435	86833510	568	annot_exons	4
novel_circ_000035	ENSBTAG00000005903	29	+	45855752	45857137	325	annot_exons	2
novel_circ_000036	ENSBTAG00000021769	2	-	112610016	112621155	1107	annot_exons	7
novel_circ_000037	ENSBTAG00000007139	17	+	57134861	57141004	3946	exon_intron
novel_circ_000038	ENSBTAG00000005493	6	+	113406639	113444423	3686	exon_intron
novel_circ_000039	ENSBTAG00000013013	1	-	111764129	111776202	499	annot_exons	4
novel_circ_000040	ENSBTAG00000020053	13	-	33905077	33918691	13615	intronic
novel_circ_000041	ENSBTAG00000009552	5	-	19544913	19545340	428	one_exon	1
novel_circ_000042	ENSBTAG00000051782	14	+	16463535	16463683	149	one_exon	1
novel_circ_000043	ENSBTAG00000016846	13	+	73312823	73318113	826	annot_exons	5
novel_circ_000044	ENSBTAG00000002823	3	-	931559	942009	617	annot_exons	4
novel_circ_000045	ENSBTAG00000007814	1	+	118497120	118497553	434	one_exon	1
novel_circ_000046	ENSBTAG00000021103	2	-	65349749	65355382	330	annot_exons	3
novel_circ_000047	ENSBTAG00000020018	9	+	34653805	34691842	1292	exon_intron
novel_circ_000048	ENSBTAG00000008613	15	+	63688676	63700172	662	annot_exons	4
novel_circ_000049	ENSBTAG00000004570	16	+	38260178	38269378	430	annot_exons	3
novel_circ_000050	ENSBTAG00000020648	6	-	68777692	68866249	426	annot_exons	2
novel_circ_000051	ENSBTAG00000016572	2	-	106495760	106527571	1244	exon_intron
novel_circ_000052	ENSBTAG00000004035	25	-	39600270	39618880	608	annot_exons	4
novel_circ_000053	ENSBTAG00000003068	17	+	521768	530458	717	annot_exons	4
novel_circ_000054	ENSBTAG00000018272	16	+	44771734	44772202	469	exon_intron
novel_circ_000055	ENSBTAG00000016433	X	+	128644688	128659299	1607	annot_exons	5
novel_circ_000056	ENSBTAG00000001485	7	+	102150079	102150465	387	one_exon	1
novel_circ_000057	ENSBTAG00000014399	15	+	63612834	63623477	1034	annot_exons	6
novel_circ_000058	ENSBTAG00000018225	18	+	47884640	47888978	4339	intronic
novel_circ_000059	ENSBTAG00000015414	19	-	49832960	49881470	2918	exon_intron
novel_circ_000060	ENSBTAG00000000662	5	-	113117314	113151865	5809	annot_exons	2
novel_circ_000061	ENSBTAG00000006003	2	+	4510181	4517435	734	annot_exons	3
novel_circ_000062	ENSBTAG00000044074	13	+	22833611	22866304	390	annot_exons	4
novel_circ_000063	ENSBTAG00000044063	24	+	25481492	25524359	886	annot_exons	7
novel_circ_000064	ENSBTAG00000012142	22	+	17603486	17603823	338	one_exon	1
novel_circ_000065	ENSBTAG00000010290	19	+	12903292	12912727	674	annot_exons	5
novel_circ_000066	ENSBTAG00000017567	19	-	13608770	13631040	991	annot_exons	8
novel_circ_000067	ENSBTAG00000003338	14	-	77474901	77482329	440	annot_exons	3
novel_circ_000068	ENSBTAG00000046760	5	-	119239107	119240484	1378	exon_intron
novel_circ_000069	ENSBTAG00000001182	4	-	61224111	61234017	346	annot_exons	3
novel_circ_000070	ENSBTAG00000018690	5	+	32603472	32623165	1046	annot_exons	8
novel_circ_000071	NA	11	-	1062369	1063822	1454	intergenic
novel_circ_000072	ENSBTAG00000020314	28	-	45790370	45799936	726	annot_exons	6
novel_circ_000073	ENSBTAG00000002313	5	+	83388461	83400981	972	annot_exons	6
novel_circ_000074	ENSBTAG00000019949	1	+	130949278	130949502	225	one_exon	1
novel_circ_000075	ENSBTAG00000049835	14	-	12584086	12589797	5712	exon_intron
novel_circ_000076	ENSBTAG00000016828	23	+	7473901	7474063	163	antisense
novel_circ_000077	ENSBTAG00000000137	6	-	67287614	67295893	522	annot_exons	5
novel_circ_000078	ENSBTAG00000003410	21	-	23947903	23959001	11099	exon_intron
novel_circ_000079	ENSBTAG00000004570	16	+	38226088	38226866	779	intronic
novel_circ_000080	ENSBTAG00000001391	29	-	12423501	12457996	1245	annot_exons	9
novel_circ_000081	ENSBTAG00000013792	19	+	55444242	55444391	150	antisense
novel_circ_000082	ENSBTAG00000049368	21	-	28441675	28457545	926	exon_intron
novel_circ_000083	NA	27	+	6222012	6222696	685	intergenic
novel_circ_000084	ENSBTAG00000026371	25	+	10769390	10775248	278	annot_exons	3
novel_circ_000085	ENSBTAG00000008736	4	+	111965680	111966278	599	exon_intron
novel_circ_000086	ENSBTAG00000016504	3	+	115484384	115546905	706	annot_exons	5
novel_circ_000087	ENSBTAG00000000415	20	-	13580015	13591711	365	annot_exons	5
novel_circ_000088	ENSBTAG00000007734	11	-	14587789	14608986	376	annot_exons	4
novel_circ_000089	ENSBTAG00000020417	7	+	20041423	20041577	155	one_exon	1
novel_circ_000090	ENSBTAG00000024095	3	-	109568987	109569400	414	intronic
novel_circ_000091	ENSBTAG00000007743	4	-	46614012	46630646	943	annot_exons	6
novel_circ_000092	ENSBTAG00000014636	18	+	38357761	38358079	319	intronic
novel_circ_000093	NA	26	+	50867549	50871811	4263	intergenic
novel_circ_000094	ENSBTAG00000011981	14	-	30834389	30835063	258	annot_exons	2
novel_circ_000095	ENSBTAG00000001533	9	+	45149934	45166510	1031	annot_exons	6
novel_circ_000096	ENSBTAG00000005221	5	+	107697313	107699063	395	annot_exons	2
novel_circ_000097	ENSBTAG00000011363	3	+	50780880	50783803	458	annot_exons	4
novel_circ_000098	ENSBTAG00000001771	1	+	149694866	149699013	432	annot_exons	2
novel_circ_000099	ENSBTAG00000005908	25	-	38003874	38004226	353	one_exon	1
novel_circ_000100	ENSBTAG00000001657	29	+	9552575	9583408	1024	annot_exons	10
novel_circ_000101	ENSBTAG00000009693	26	+	15942967	15977012	608	annot_exons	6
novel_circ_000102	ENSBTAG00000016298	26	-	17874075	17903311	1083	annot_exons	8
novel_circ_000103	ENSBTAG00000001700	2	-	130735075	130740242	1216	annot_exons	5
novel_circ_000104	ENSBTAG00000007125	19	-	53962881	53963277	316	exon_intron
novel_circ_000105	ENSBTAG00000016533	22	+	30601256	30633731	464	annot_exons	3
novel_circ_000106	NA	5	-	489866	490393	528	intergenic
novel_circ_000107	ENSBTAG00000017124	3	-	34451243	34457243	784	annot_exons	6
novel_circ_000108	ENSBTAG00000011337	20	-	62619263	62641811	271	annot_exons	2
novel_circ_000109	ENSBTAG00000005208	25	+	9651928	9667435	728	annot_exons	6
novel_circ_000110	ENSBTAG00000017019	14	-	19460851	19462826	386	annot_exons	2
novel_circ_000111	NA	27	+	6220636	6221437	802	intergenic
novel_circ_000112	ENSBTAG00000005482	29	-	8390129	8391507	1379	exon_intron
novel_circ_000113	ENSBTAG00000009912	12	-	31895183	31940539	543	annot_exons	5
novel_circ_000114	NA	27	-	6220415	6221062	648	intergenic
novel_circ_000115	ENSBTAG00000002002	14	+	16475273	16503434	2044	annot_exons	13
novel_circ_000116	ENSBTAG00000016578	2	+	129504997	129522574	777	annot_exons	5
novel_circ_000117	ENSBTAG00000052059	14	-	12458977	12549239	14497	exon_intron
novel_circ_000118	ENSBTAG00000007386	14	+	55124067	55140241	840	annot_exons	5
novel_circ_000119	ENSBTAG00000038794	8	-	98619612	98625098	471	annot_exons	3
novel_circ_000120	ENSBTAG00000003855	X	-	91611088	91611334	247	one_exon	1
novel_circ_000121	ENSBTAG00000023814	1	-	94752255	94760367	942	annot_exons	8
novel_circ_000122	ENSBTAG00000001529	27	-	33436478	33438641	586	annot_exons	3
novel_circ_000123	ENSBTAG00000012177	18	-	53250782	53253692	2911	exon_intron
novel_circ_000124	ENSBTAG00000014261	20	-	40314244	40316796	752	annot_exons	6
novel_circ_000125	ENSBTAG00000003399	17	-	14353162	14356650	635	annot_exons	4
novel_circ_000126	ENSBTAG00000014451	1	-	83387013	83395999	671	annot_exons	5
novel_circ_000127	NA	5	-	116407384	116407732	349	intergenic
novel_circ_000128	ENSBTAG00000012564	19	-	46043069	46065215	556	annot_exons	4
novel_circ_000129	ENSBTAG00000012448	5	-	81349959	81447635	656	annot_exons	5
novel_circ_000130	ENSBTAG00000009407	19	+	35540835	35547121	534	annot_exons	4
novel_circ_000131	ENSBTAG00000015019	26	-	24442064	24479104	1815	annot_exons	9
novel_circ_000132	ENSBTAG00000001887	2	+	44048467	44051478	324	annot_exons	2
novel_circ_000133	ENSBTAG00000025400	12	-	36403606	36420157	1850	annot_exons	5
novel_circ_000134	ENSBTAG00000021921	11	-	94320965	94324073	510	annot_exons	5
novel_circ_000135	ENSBTAG00000009293	21	+	65038868	65050780	347	annot_exons	2
novel_circ_000136	ENSBTAG00000031433	10	-	54049153	54053191	436	annot_exons	3
novel_circ_000137	ENSBTAG00000009239	9	-	39203797	39209354	608	annot_exons	2
novel_circ_000138	ENSBTAG00000023675	1	+	36129979	36133911	479	annot_exons	3
novel_circ_000139	ENSBTAG00000008805	10	-	46455047	46463789	477	annot_exons	5
novel_circ_000140	ENSBTAG00000019130	28	+	29256630	29257639	260	annot_exons	2
novel_circ_000141	ENSBTAG00000005147	29	+	26363149	26371429	952	annot_exons	7
novel_circ_000142	NA	12	-	75681294	75682746	1453	intergenic
novel_circ_000143	ENSBTAG00000002902	5	-	34897777	34916113	909	annot_exons	6
novel_circ_000144	ENSBTAG00000044150	3	-	3049013	3050815	1803	intronic
novel_circ_000145	ENSBTAG00000021773	25	+	12835238	12847207	377	annot_exons	2
novel_circ_000146	ENSBTAG00000006531	13	+	46780156	46782034	468	annot_exons	4
novel_circ_000147	ENSBTAG00000005668	6	+	22462089	22500198	28730	exon_intron
novel_circ_000148	ENSBTAG00000017326	3	+	87489830	87506272	1234	annot_exons	6
novel_circ_000149	ENSBTAG00000011268	14	+	73541789	73554967	13179	exon_intron
novel_circ_000150	ENSBTAG00000000928	19	-	33557605	33567104	589	exon_intron
novel_circ_000151	ENSBTAG00000004902	14	-	69498557	69503235	623	annot_exons	5
novel_circ_000152	ENSBTAG00000013611	17	+	28770361	28805337	417	annot_exons	4
novel_circ_000153	ENSBTAG00000032881	14	-	33545264	33568943	516	annot_exons	3
novel_circ_000154	ENSBTAG00000001700	2	-	130739803	130754601	536	annot_exons	4
novel_circ_000155	ENSBTAG00000007634	27	+	37613964	37618667	257	annot_exons	3
novel_circ_000156	ENSBTAG00000020806	5	-	47489620	47494275	868	annot_exons	3
novel_circ_000157	ENSBTAG00000003378	1	+	72222453	72223387	174	annot_exons	2
novel_circ_000158	ENSBTAG00000011397	8	+	59497193	59515229	641	annot_exons	3
novel_circ_000159	NA	27	+	6220562	6220827	266	intergenic
novel_circ_000160	ENSBTAG00000005960	9	-	69048717	69050141	683	annot_exons	2
novel_circ_000161	ENSBTAG00000014711	4	-	32301749	32313581	404	annot_exons	3
novel_circ_000162	ENSBTAG00000014057	9	-	62428789	62436989	8201	intronic
novel_circ_000163	ENSBTAG00000009584	29	+	45958153	45976947	18795	exon_intron
novel_circ_000164	NA	27	+	6220636	6220982	347	intergenic
novel_circ_000165	ENSBTAG00000048843	14	-	37130355	37136182	195	annot_exons	2
novel_circ_000166	ENSBTAG00000003111	15	+	17914925	17936195	1482	annot_exons	10
novel_circ_000167	NA	8	-	8317790	8322639	4850	intergenic
novel_circ_000168	ENSBTAG00000048466	18	+	64432982	64435692	2711	exon_intron
novel_circ_000169	ENSBTAG00000011484	22	+	54236200	54237506	1307	exon_intron
novel_circ_000170	ENSBTAG00000020303	7	+	59813007	59816199	464	annot_exons	3
novel_circ_000171	ENSBTAG00000000149	3	-	113213250	113221244	772	annot_exons	5
novel_circ_000172	ENSBTAG00000020648	6	-	68893084	68893765	682	intronic
novel_circ_000173	ENSBTAG00000031890	26	+	46448483	46462019	278	annot_exons	4
novel_circ_000174	ENSBTAG00000004499	8	+	102756596	102770084	279	annot_exons	3
novel_circ_000175	ENSBTAG00000005668	6	+	22497056	22500198	461	annot_exons	3
novel_circ_000176	ENSBTAG00000017770	4	+	102909515	102946273	910	annot_exons	7
novel_circ_000177	ENSBTAG00000019877	3	+	83059986	83066964	644	annot_exons	4
novel_circ_000178	ENSBTAG00000000222	28	-	7939384	7950947	1499	annot_exons	3
novel_circ_000179	ENSBTAG00000005503	1	+	146330918	146332147	327	annot_exons	2
novel_circ_000180	ENSBTAG00000004742	1	-	147016493	147016684	192	one_exon	1
novel_circ_000181	NA	10	+	559428	559675	248	intergenic
novel_circ_000182	ENSBTAG00000021691	2	-	34986265	34999915	309	annot_exons	3
novel_circ_000183	ENSBTAG00000003740	X	-	98721034	98753108	339	annot_exons	4
novel_circ_000184	ENSBTAG00000033690	2	-	102803457	102835306	1356	annot_exons	4
novel_circ_000185	ENSBTAG00000008169	24	+	53748976	53760679	1240	annot_exons	5
novel_circ_000186	ENSBTAG00000050263	7	-	68813423	68820060	6638	exon_intron
novel_circ_000187	ENSBTAG00000002411	15	+	81005109	81005193	85	one_exon	1
novel_circ_000188	ENSBTAG00000003954	3	+	15121689	15156614	5085	exon_intron
novel_circ_000189	ENSBTAG00000048674	12	+	79039770	79040367	598	one_exon	1
novel_circ_000190	ENSBTAG00000006614	22	+	55994008	55994708	701	one_exon	1
novel_circ_000191	ENSBTAG00000008805	10	-	46480909	46485029	193	annot_exons	2
novel_circ_000192	ENSBTAG00000009693	26	+	15942967	15985120	689	annot_exons	7
novel_circ_000193	ENSBTAG00000039195	X	-	126004628	126010706	6079	intronic
novel_circ_000194	ENSBTAG00000013341	X	-	138693922	138706646	4260	exon_intron
novel_circ_000195	ENSBTAG00000007329	12	+	19037675	19047728	1027	annot_exons	6
novel_circ_000196	ENSBTAG00000017860	4	-	103179038	103180121	1084	one_exon	1
novel_circ_000197	ENSBTAG00000054628	13	+	58541531	58541867	337	one_exon	1
novel_circ_000198	ENSBTAG00000012443	12	+	2495049	2509457	370	annot_exons	2
novel_circ_000199	ENSBTAG00000016002	20	+	6717225	6721176	309	annot_exons	2
novel_circ_000200	ENSBTAG00000003178	26	-	41810163	41823113	707	annot_exons	5
novel_circ_000201	ENSBTAG00000003934	12	+	36275150	36297445	829	annot_exons	5
novel_circ_000202	ENSBTAG00000018660	5	+	119706411	119720520	371	annot_exons	2
novel_circ_000203	ENSBTAG00000017382	3	+	103490694	103491186	493	exon_intron
novel_circ_000204	ENSBTAG00000019855	X	+	123735341	123764438	3156	exon_intron
novel_circ_000205	ENSBTAG00000026716	9	-	22029435	22040329	301	annot_exons	3
novel_circ_000206	ENSBTAG00000020423	17	-	45063107	45063374	268	exon_intron
novel_circ_000207	ENSBTAG00000002755	24	+	41485144	41502194	708	annot_exons	5
novel_circ_000208	NA	7	-	94450426	94452851	2426	intergenic
novel_circ_000209	ENSBTAG00000038929	13	+	78777242	78777772	531	exon_intron
novel_circ_000210	ENSBTAG00000003619	6	+	6520283	6564708	495	annot_exons	4
novel_circ_000211	ENSBTAG00000018256	11	+	80888999	80889646	236	annot_exons	2
novel_circ_000212	ENSBTAG00000018488	6	-	101854071	101854400	330	antisense
novel_circ_000213	ENSBTAG00000008987	11	+	29207845	29209057	1213	one_exon	1
novel_circ_000214	ENSBTAG00000017053	28	-	1483681	1487460	442	annot_exons	3
novel_circ_000215	ENSBTAG00000018236	2	+	71811708	71821088	436	annot_exons	4
novel_circ_000216	ENSBTAG00000012047	8	-	39381634	39383392	232	annot_exons	2
novel_circ_000217	ENSBTAG00000020309	7	+	62987962	62988671	256	annot_exons	2
novel_circ_000218	ENSBTAG00000007508	11	-	27973554	28024417	1059	annot_exons	9
novel_circ_000219	ENSBTAG00000021190	24	+	28845825	28869437	1647	annot_exons	9
novel_circ_000220	ENSBTAG00000011876	1	+	148622266	148626199	420	annot_exons	3
novel_circ_000221	ENSBTAG00000009498	26	-	9546497	9548064	1568	antisense
novel_circ_000222	ENSBTAG00000020130	8	+	1622916	1628042	616	annot_exons	2
novel_circ_000223	ENSBTAG00000018199	2	-	121021137	121024942	994	annot_exons	2
novel_circ_000224	ENSBTAG00000006786	10	-	82215521	82220418	560	annot_exons	5
novel_circ_000225	ENSBTAG00000005997	4	+	32935254	32944905	1660	annot_exons	12
novel_circ_000226	ENSBTAG00000033197	4	+	49784402	49785902	402	annot_exons	3
novel_circ_000227	ENSBTAG00000016287	19	-	55791865	55799969	1733	annot_exons	12
novel_circ_000228	ENSBTAG00000011041	10	-	84504887	84509880	720	annot_exons	2
novel_circ_000229	ENSBTAG00000020126	20	+	56384132	56394773	319	annot_exons	3
novel_circ_000230	ENSBTAG00000017369	8	+	46340818	46375224	653	annot_exons	4
novel_circ_000231	ENSBTAG00000001932	11	-	99559872	99560042	171	one_exon	1
novel_circ_000232	ENSBTAG00000006323	9	+	94463432	94466225	288	annot_exons	3
novel_circ_000233	ENSBTAG00000021963	6	+	67079743	67088238	825	annot_exons	4
novel_circ_000234	ENSBTAG00000008169	24	+	53752896	53760679	306	annot_exons	3
novel_circ_000235	ENSBTAG00000027321	3	-	50255055	50277953	909	annot_exons	6
novel_circ_000236	ENSBTAG00000000176	2	+	22806401	22853381	1843	annot_exons	4
novel_circ_000237	ENSBTAG00000018307	22	-	50170397	50170785	389	exon_intron
novel_circ_000238	ENSBTAG00000007566	16	+	33939694	33951378	436	annot_exons	4
novel_circ_000239	ENSBTAG00000000700	15	-	40235427	40238681	264	annot_exons	3
novel_circ_000240	ENSBTAG00000009020	11	+	18836096	18854840	18745	exon_intron
novel_circ_000241	ENSBTAG00000009006	17	-	70391707	70392230	524	one_exon	1
novel_circ_000242	ENSBTAG00000002260	15	-	83478140	83494326	1166	annot_exons	9
novel_circ_000243	ENSBTAG00000039766	17	-	44626584	44632941	929	annot_exons	8
novel_circ_000244	ENSBTAG00000005514	20	-	58745956	58746790	243	annot_exons	2
novel_circ_000245	ENSBTAG00000010542	24	-	42919619	42921665	243	annot_exons	2
novel_circ_000246	ENSBTAG00000016002	20	+	6696257	6700315	493	annot_exons	4
novel_circ_000247	ENSBTAG00000003178	26	-	41804295	41823113	3635	exon_intron
novel_circ_000248	NA	1	-	152877952	152878436	485	intergenic
novel_circ_000249	ENSBTAG00000012272	5	+	1331046	1331827	393	annot_exons	2
novel_circ_000250	ENSBTAG00000031388	10	+	54828515	54851202	18454	exon_intron
novel_circ_000251	ENSBTAG00000034626	8	+	10293150	10293434	285	one_exon	1
novel_circ_000252	ENSBTAG00000017124	3	-	34441050	34442999	248	annot_exons	2
novel_circ_000253	ENSBTAG00000048054	11	+	106109077	106111850	1075	annot_exons	6
novel_circ_000254	ENSBTAG00000021653	2	-	117877288	117886641	405	annot_exons	4
novel_circ_000255	ENSBTAG00000027569	6	-	59825537	59835605	419	annot_exons	4
novel_circ_000256	ENSBTAG00000008341	10	-	9976330	9981382	378	annot_exons	2
novel_circ_000257	ENSBTAG00000001652	21	-	15138204	15138669	466	one_exon	1
novel_circ_000258	ENSBTAG00000006044	6	+	58283836	58305578	917	annot_exons	5
novel_circ_000259	ENSBTAG00000016656	1	+	67048922	67051120	734	annot_exons	2
novel_circ_000260	ENSBTAG00000003366	8	+	11569451	11574022	706	annot_exons	5
novel_circ_000261	ENSBTAG00000021686	8	+	60780005	60793049	704	annot_exons	7
novel_circ_000262	ENSBTAG00000018971	10	+	80125332	80125598	267	intronic
novel_circ_000263	ENSBTAG00000005227	3	-	7795867	7797160	278	annot_exons	2
novel_circ_000264	ENSBTAG00000024918	15	-	6403130	6408284	3406	exon_intron
novel_circ_000265	ENSBTAG00000002907	15	-	53514052	53518630	662	annot_exons	4
novel_circ_000266	ENSBTAG00000003185	14	+	10340991	10342141	1151	exon_intron
novel_circ_000267	NA	14	+	58184529	58189662	5134	intergenic
novel_circ_000268	ENSBTAG00000025129	19	-	23359788	23361210	734	annot_exons	3
novel_circ_000269	ENSBTAG00000012010	29	-	613770	618894	3260	exon_intron
novel_circ_000270	ENSBTAG00000048271	5	-	109224370	109235547	1620	annot_exons	10
novel_circ_000271	ENSBTAG00000010718	16	+	60283795	60283985	191	one_exon	1
novel_circ_000272	ENSBTAG00000020958	3	+	53348433	53351774	3342	antisense
novel_circ_000273	NA	27	+	6220659	6221054	396	intergenic
novel_circ_000274	ENSBTAG00000052736	8	+	40361503	40369366	1334	annot_exons	2
novel_circ_000275	ENSBTAG00000015662	1	-	45788928	45809893	494	annot_exons	5
novel_circ_000276	ENSBTAG00000017611	28	+	39346470	39359170	359	annot_exons	2
novel_circ_000277	ENSBTAG00000009602	17	-	53537127	53546660	482	annot_exons	5
novel_circ_000278	ENSBTAG00000002620	28	-	24824210	24829050	704	annot_exons	4
novel_circ_000279	ENSBTAG00000001269	6	+	70849335	70860390	585	annot_exons	3
novel_circ_000280	ENSBTAG00000000878	14	-	21510347	21521177	1373	exon_intron
novel_circ_000281	ENSBTAG00000020552	16	-	53864933	53886608	502	annot_exons	4
novel_circ_000282	ENSBTAG00000001108	11	+	68187989	68221333	971	annot_exons	10
novel_circ_000283	ENSBTAG00000014689	14	+	31257817	31279395	1184	annot_exons	8
novel_circ_000284	ENSBTAG00000030966	25	+	36341635	36342118	266	annot_exons	2
novel_circ_000285	ENSBTAG00000014044	5	+	24924594	24935678	835	annot_exons	4
novel_circ_000286	ENSBTAG00000014858	19	-	34281024	34292241	1309	exon_intron
novel_circ_000287	ENSBTAG00000001117	17	+	33159139	33165949	3781	annot_exons	2
novel_circ_000288	ENSBTAG00000007920	13	-	51291458	51291810	353	one_exon	1
novel_circ_000289	ENSBTAG00000003395	26	+	44499639	44500489	851	one_exon	1
novel_circ_000290	ENSBTAG00000031890	26	+	46523096	46579400	287	annot_exons	3
novel_circ_000291	ENSBTAG00000007876	28	+	42784526	42787997	402	annot_exons	3
novel_circ_000292	ENSBTAG00000025308	10	-	92645386	92661233	409	annot_exons	2
novel_circ_000293	ENSBTAG00000033010	11	+	15190159	15205740	552	annot_exons	4
novel_circ_000294	ENSBTAG00000018941	26	-	43577968	43621504	349	annot_exons	3
novel_circ_000295	ENSBTAG00000000974	8	-	83855118	83861780	475	annot_exons	4
novel_circ_000296	ENSBTAG00000006209	14	+	46065687	46165417	99731	exon_intron
novel_circ_000297	ENSBTAG00000016828	23	+	7474010	7474170	161	antisense
novel_circ_000298	ENSBTAG00000000446	12	+	86337868	86347235	531	annot_exons	5
novel_circ_000299	ENSBTAG00000017455	27	+	34173885	34198394	1048	annot_exons	9
novel_circ_000300	ENSBTAG00000007386	14	+	55118588	55134880	900	annot_exons	5
novel_circ_000301	ENSBTAG00000007308	21	+	34012832	34015929	531	annot_exons	2
novel_circ_000302	ENSBTAG00000013592	28	+	13143501	13144002	223	annot_exons	2
novel_circ_000303	ENSBTAG00000014451	1	-	83338524	83361384	1908	annot_exons	11
novel_circ_000304	ENSBTAG00000013013	1	-	111772503	111776202	297	annot_exons	2
novel_circ_000305	ENSBTAG00000019105	19	+	51194160	51200718	447	annot_exons	4
novel_circ_000306	ENSBTAG00000010312	17	+	72033750	72050978	973	annot_exons	7
novel_circ_000307	ENSBTAG00000014768	4	-	112235018	112238879	280	annot_exons	2
novel_circ_000308	ENSBTAG00000004636	26	+	42226185	42259191	1261	annot_exons	12
novel_circ_000309	ENSBTAG00000002472	16	+	52018487	52019404	290	annot_exons	2
novel_circ_000310	ENSBTAG00000030962	22	-	59449223	59450291	262	annot_exons	2
novel_circ_000311	ENSBTAG00000016691	12	+	14093502	14100510	950	annot_exons	3
novel_circ_000312	ENSBTAG00000020212	10	-	8598298	8600964	345	annot_exons	3
novel_circ_000313	ENSBTAG00000010219	4	+	112569042	112571572	1834	exon_intron
novel_circ_000314	ENSBTAG00000016529	12	+	15551538	15556945	444	annot_exons	4
novel_circ_000315	ENSBTAG00000040215	2	+	131802585	131810415	513	annot_exons	3
novel_circ_000316	ENSBTAG00000020436	8	-	77154762	77169004	1530	annot_exons	3
novel_circ_000317	ENSBTAG00000007860	16	-	76051879	76052579	480	annot_exons	3
novel_circ_000318	ENSBTAG00000018868	25	+	20123999	20124183	185	one_exon	1
novel_circ_000319	ENSBTAG00000052736	8	+	40368241	40428653	60413	exon_intron
novel_circ_000320	ENSBTAG00000033747	7	-	50349094	50373965	535	annot_exons	4
novel_circ_000321	ENSBTAG00000001579	14	+	3100810	3137852	2452	annot_exons	17
novel_circ_000322	ENSBTAG00000020053	13	-	33824847	33918792	93946	exon_intron
novel_circ_000323	ENSBTAG00000017799	17	-	67311680	67312278	91	annot_exons	2
novel_circ_000324	ENSBTAG00000043550	MT	+	14380	14530	151	exon_intron
novel_circ_000325	ENSBTAG00000007937	23	-	2670005	2673157	259	annot_exons	2
novel_circ_000326	ENSBTAG00000005221	5	+	107633565	107666986	1383	annot_exons	7
novel_circ_000327	ENSBTAG00000011412	4	-	49010948	49011963	312	annot_exons	2
novel_circ_000328	ENSBTAG00000015887	3	+	103927120	103927444	325	one_exon	1
novel_circ_000329	ENSBTAG00000018540	29	-	6137644	6137936	293	antisense
novel_circ_000330	ENSBTAG00000009665	9	+	81837657	81848272	642	annot_exons	4
novel_circ_000331	ENSBTAG00000002326	10	+	67624059	67627692	255	annot_exons	2
novel_circ_000332	ENSBTAG00000006765	7	-	57356816	57358547	435	annot_exons	3
novel_circ_000333	ENSBTAG00000001752	9	-	80958585	80960717	551	annot_exons	2
novel_circ_000334	ENSBTAG00000010819	8	-	9706245	9708260	2016	intronic
novel_circ_000335	ENSBTAG00000009426	4	-	112039053	112057422	1169	annot_exons	8
novel_circ_000336	ENSBTAG00000026842	2	+	61971692	62006201	375	annot_exons	3
novel_circ_000337	ENSBTAG00000002175	4	-	46313202	46323122	1131	annot_exons	6
novel_circ_000338	ENSBTAG00000012382	8	-	72763885	72764994	314	annot_exons	3
novel_circ_000339	ENSBTAG00000013621	14	-	69571502	69574743	484	annot_exons	4
novel_circ_000340	ENSBTAG00000043989	2	+	125389163	125389358	196	one_exon	1
novel_circ_000341	NA	27	+	6220644	6220808	165	intergenic
novel_circ_000342	ENSBTAG00000016026	1	+	126209197	126212738	262	annot_exons	2
novel_circ_000343	ENSBTAG00000011419	7	+	49897538	49897705	168	antisense
novel_circ_000344	ENSBTAG00000017064	5	-	103783185	103783339	155	antisense
novel_circ_000345	ENSBTAG00000018824	16	+	26103658	26114303	3201	annot_exons	4
novel_circ_000346	ENSBTAG00000016750	8	-	101668200	101700006	1087	annot_exons	5
novel_circ_000347	ENSBTAG00000030817	4	-	118268893	118273831	257	annot_exons	3
novel_circ_000348	ENSBTAG00000000746	1	+	157298941	157303595	4655	exon_intron
novel_circ_000349	ENSBTAG00000017215	21	+	55459979	55464259	427	annot_exons	4
novel_circ_000350	ENSBTAG00000039442	1	-	97405429	97412739	513	annot_exons	4
novel_circ_000351	ENSBTAG00000025929	8	-	22204142	22204450	309	intronic
novel_circ_000352	ENSBTAG00000015271	14	-	73919898	73924174	310	annot_exons	2
novel_circ_000353	ENSBTAG00000020018	9	+	34689114	34691842	678	exon_intron
novel_circ_000354	NA	27	-	6220492	6220773	282	intergenic
novel_circ_000355	ENSBTAG00000003381	20	-	66458066	66466592	1649	annot_exons	6
novel_circ_000356	ENSBTAG00000000683	13	-	46300667	46312046	689	annot_exons	7
novel_circ_000357	ENSBTAG00000027316	13	-	78134634	78136410	1777	intronic
novel_circ_000358	ENSBTAG00000010360	22	+	35061803	35062123	321	one_exon	1
novel_circ_000359	ENSBTAG00000004138	18	+	54599152	54607377	4099	exon_intron
novel_circ_000360	NA	5	-	111873150	111873411	262	intergenic
novel_circ_000361	ENSBTAG00000005269	10	-	51184214	51198231	1514	exon_intron
novel_circ_000362	NA	27	+	6222012	6222367	356	intergenic
novel_circ_000363	ENSBTAG00000049577	18	+	56028917	56030157	693	exon_intron
novel_circ_000364	ENSBTAG00000006824	22	-	43863829	43866639	578	annot_exons	4
novel_circ_000365	NA	27	-	6220415	6220786	372	intergenic
novel_circ_000366	ENSBTAG00000015776	3	-	43197244	43215886	807	annot_exons	7
novel_circ_000367	ENSBTAG00000014399	15	+	63589939	63597230	4373	annot_exons	2
novel_circ_000368	ENSBTAG00000002190	8	-	44230775	44232327	1553	intronic
novel_circ_000369	ENSBTAG00000022069	17	-	55205050	55226655	1950	exon_intron
novel_circ_000370	ENSBTAG00000003619	6	+	6503154	6511142	683	annot_exons	4
novel_circ_000371	ENSBTAG00000031567	22	+	52016113	52017705	340	annot_exons	3
novel_circ_000372	ENSBTAG00000002341	29	-	31836432	31842826	588	annot_exons	3
novel_circ_000373	ENSBTAG00000011172	11	-	11006411	11012512	5045	annot_exons	2
novel_circ_000374	ENSBTAG00000008237	29	+	50178016	50181536	577	annot_exons	4
novel_circ_000375	ENSBTAG00000026199	25	+	38802245	38802396	152	one_exon	1
novel_circ_000376	ENSBTAG00000018873	13	+	72895959	72896418	460	one_exon	1
novel_circ_000377	ENSBTAG00000000655	21	+	47503841	47504072	232	one_exon	1
novel_circ_000378	ENSBTAG00000019866	13	+	19776731	19777389	659	intronic
novel_circ_000379	ENSBTAG00000019105	19	+	51175746	51190373	639	annot_exons	6
novel_circ_000380	ENSBTAG00000000088	1	+	50095103	50104769	556	annot_exons	4
novel_circ_000381	ENSBTAG00000009983	10	+	16290081	16296312	305	annot_exons	3
novel_circ_000382	ENSBTAG00000004054	21	+	61372930	61409967	2378	annot_exons	21
novel_circ_000383	ENSBTAG00000033089	13	-	32053599	32067529	3561	exon_intron
novel_circ_000384	ENSBTAG00000007245	25	-	1190250	1241910	4320	annot_exons	29
novel_circ_000385	ENSBTAG00000001579	14	+	3100810	3101516	707	exon_intron
novel_circ_000386	ENSBTAG00000001391	29	-	12453176	12468133	528	annot_exons	4
novel_circ_000387	ENSBTAG00000048628	16	-	72924190	72995232	898	annot_exons	6
novel_circ_000388	ENSBTAG00000015571	23	+	7023875	7024188	228	annot_exons	2
novel_circ_000389	ENSBTAG00000016004	6	-	25562295	25567002	415	annot_exons	3
novel_circ_000390	ENSBTAG00000052341	4	-	9144524	9149280	4757	exon_intron
novel_circ_000391	ENSBTAG00000009210	29	-	36410502	36429241	1407	annot_exons	4
novel_circ_000392	ENSBTAG00000002447	7	-	6505029	6514550	1547	annot_exons	4
novel_circ_000393	NA	10	+	53712479	53718349	5871	intergenic
novel_circ_000394	ENSBTAG00000010548	14	+	8630305	8633754	400	annot_exons	2
novel_circ_000395	ENSBTAG00000006122	X	-	90991118	90992293	402	annot_exons	3
novel_circ_000396	ENSBTAG00000006114	17	+	52953729	52962716	820	annot_exons	8
novel_circ_000397	ENSBTAG00000007920	13	-	51280189	51291810	1034	annot_exons	5
novel_circ_000398	ENSBTAG00000048655	9	-	63984259	63989937	412	annot_exons	2
novel_circ_000399	ENSBTAG00000018460	20	-	67931700	67937592	480	annot_exons	2
novel_circ_000400	ENSBTAG00000008204	8	-	51074155	51077627	434	annot_exons	3
novel_circ_000401	ENSBTAG00000011544	11	+	96189695	96194889	707	annot_exons	4
novel_circ_000402	ENSBTAG00000021304	21	-	55187152	55191296	637	annot_exons	2
novel_circ_000403	ENSBTAG00000012501	18	+	22207985	22225683	344	annot_exons	3
novel_circ_000404	ENSBTAG00000017455	27	+	34173885	34180989	352	annot_exons	3
novel_circ_000405	ENSBTAG00000025219	19	+	14837921	14870678	27583	exon_intron
novel_circ_000406	ENSBTAG00000019889	12	-	47520690	47524887	951	annot_exons	7
novel_circ_000407	ENSBTAG00000039172	11	+	94123536	94155626	1486	annot_exons	10
novel_circ_000408	ENSBTAG00000018437	8	+	46417536	46466576	868	annot_exons	7
novel_circ_000409	ENSBTAG00000005083	9	+	94928493	94934208	483	annot_exons	3
novel_circ_000410	ENSBTAG00000021023	3	-	110352638	110355454	420	annot_exons	3
novel_circ_000411	ENSBTAG00000010692	4	+	91919355	91938758	750	annot_exons	7
novel_circ_000412	ENSBTAG00000017164	5	-	29469020	29470739	241	annot_exons	2
novel_circ_000413	ENSBTAG00000015543	18	+	53986753	53990629	3877	one_exon	1
novel_circ_000414	ENSBTAG00000016691	12	+	14093502	14094935	784	annot_exons	2
novel_circ_000415	ENSBTAG00000031846	17	-	64383036	64400286	17251	antisense
novel_circ_000416	ENSBTAG00000020436	8	-	77120719	77169004	2715	annot_exons	10
novel_circ_000417	ENSBTAG00000005681	9	-	23227672	23251095	342	annot_exons	3
novel_circ_000418	ENSBTAG00000013769	1	+	55974621	55977653	224	annot_exons	2
novel_circ_000419	ENSBTAG00000002015	X	+	68610592	68625140	963	annot_exons	8
novel_circ_000420	ENSBTAG00000010622	3	-	15437226	15438559	532	annot_exons	3
novel_circ_000421	ENSBTAG00000012443	12	+	2436832	2509457	663	annot_exons	6
novel_circ_000422	ENSBTAG00000004190	3	+	49256642	49287672	1313	annot_exons	11
novel_circ_000423	ENSBTAG00000027569	6	-	59783468	59825777	422	annot_exons	4
novel_circ_000424	ENSBTAG00000009218	4	-	60800564	60802741	496	annot_exons	3
novel_circ_000425	ENSBTAG00000014493	10	-	45618082	45628500	661	annot_exons	4
novel_circ_000426	ENSBTAG00000013495	6	-	99679453	99682964	547	annot_exons	3
novel_circ_000427	ENSBTAG00000010718	16	+	60193208	60211264	394	annot_exons	4
novel_circ_000428	ENSBTAG00000021237	23	+	3630824	3636258	301	annot_exons	2
novel_circ_000429	ENSBTAG00000009207	4	+	46224738	46245942	611	annot_exons	4
novel_circ_000430	ENSBTAG00000021260	4	+	114567374	114587275	1484	exon_intron
novel_circ_000431	ENSBTAG00000037457	24	-	53583898	53590365	408	annot_exons	3
novel_circ_000432	ENSBTAG00000008650	13	-	11822144	11902796	207	annot_exons	2
novel_circ_000433	ENSBTAG00000005373	10	-	46993955	47021560	4218	annot_exons	12
novel_circ_000434	ENSBTAG00000008285	14	-	57882137	57906266	1428	annot_exons	5
novel_circ_000435	ENSBTAG00000038181	8	-	23521874	23535954	447	annot_exons	3
novel_circ_000436	ENSBTAG00000046413	6	-	31516830	31517035	206	one_exon	1
novel_circ_000437	ENSBTAG00000012677	13	+	33438632	33441433	800	annot_exons	2
novel_circ_000438	ENSBTAG00000010367	28	-	3689424	3696521	242	annot_exons	3
novel_circ_000439	ENSBTAG00000020089	19	+	12766239	12772249	313	annot_exons	2
novel_circ_000440	ENSBTAG00000034689	18	+	2407463	2440347	32885	exon_intron
novel_circ_000441	ENSBTAG00000019648	7	-	40371008	40373699	729	annot_exons	6
novel_circ_000442	ENSBTAG00000032887	23	-	18367140	18376200	318	annot_exons	3
novel_circ_000443	ENSBTAG00000021076	5	+	111603266	111608289	2691	annot_exons	2
novel_circ_000444	ENSBTAG00000017419	3	+	67023383	67031886	1844	annot_exons	3
novel_circ_000445	ENSBTAG00000010867	18	+	16683805	16707348	1150	annot_exons	7
novel_circ_000446	ENSBTAG00000008963	17	+	55711724	55722703	820	annot_exons	6
novel_circ_000447	ENSBTAG00000025029	7	+	108897123	108915347	747	annot_exons	5
novel_circ_000448	ENSBTAG00000009167	17	+	48317348	48322394	609	annot_exons	3
novel_circ_000449	ENSBTAG00000000357	27	-	24444234	24465972	2413	annot_exons	3
novel_circ_000450	ENSBTAG00000014889	1	-	43131666	43133392	341	annot_exons	2
novel_circ_000451	ENSBTAG00000014181	10	-	51247181	51247500	320	one_exon	1
novel_circ_000452	ENSBTAG00000044150	3	-	2994843	3003076	400	annot_exons	3
novel_circ_000453	ENSBTAG00000002765	13	-	81598525	81606209	447	annot_exons	4
novel_circ_000454	ENSBTAG00000010581	22	+	36010742	36015401	490	annot_exons	5
novel_circ_000455	NA	9	+	95339688	95344232	4545	intergenic
novel_circ_000456	ENSBTAG00000047338	9	-	33274437	33280079	260	annot_exons	3
novel_circ_000457	ENSBTAG00000013253	3	-	120687356	120689762	374	annot_exons	3
novel_circ_000458	ENSBTAG00000014689	14	+	31269089	31294929	1168	annot_exons	7
novel_circ_000459	ENSBTAG00000020616	3	+	113138777	113144387	846	annot_exons	7
novel_circ_000460	ENSBTAG00000020707	9	+	79844473	79845096	624	one_exon	1
novel_circ_000461	ENSBTAG00000005137	16	+	71679706	71686243	497	annot_exons	3
novel_circ_000462	ENSBTAG00000027569	6	-	59907252	59908061	810	one_exon	1
novel_circ_000463	NA	27	-	6223280	6223683	404	intergenic
novel_circ_000464	ENSBTAG00000011905	15	+	38431604	38432981	319	annot_exons	4
novel_circ_000465	ENSBTAG00000000711	14	+	8106297	8108014	1718	intronic
novel_circ_000466	ENSBTAG00000001485	7	+	102156189	102161566	434	annot_exons	4
novel_circ_000467	ENSBTAG00000002813	17	-	14440074	14458445	1594	annot_exons	6
novel_circ_000468	ENSBTAG00000015504	20	-	31554340	31579522	1479	annot_exons	7
novel_circ_000469	ENSBTAG00000052072	19	-	49719674	49720020	347	antisense
novel_circ_000470	ENSBTAG00000025898	11	-	6007542	6007913	229	annot_exons	2
novel_circ_000471	ENSBTAG00000014649	3	-	93033268	93035912	1644	annot_exons	2
novel_circ_000472	ENSBTAG00000005557	9	+	102329078	102330633	280	annot_exons	2
novel_circ_000473	ENSBTAG00000001485	7	+	102150079	102176082	2193	annot_exons	16
novel_circ_000474	ENSBTAG00000005483	4	-	119472878	119475357	212	annot_exons	2
novel_circ_000475	NA	23	+	49512221	49512757	537	intergenic
novel_circ_000476	ENSBTAG00000012148	11	+	106665064	106673819	330	annot_exons	3
novel_circ_000477	ENSBTAG00000044172	1	-	70141816	70146536	296	annot_exons	3
novel_circ_000478	NA	4	+	51908037	51910112	2076	intergenic
novel_circ_000479	ENSBTAG00000003536	20	-	62840521	62846297	514	annot_exons	4
novel_circ_000480	ENSBTAG00000007508	11	-	27991449	27999032	370	annot_exons	3
novel_circ_000481	ENSBTAG00000032079	15	-	45325196	45329744	423	annot_exons	3
novel_circ_000482	ENSBTAG00000008844	8	-	9991009	10002740	402	annot_exons	3
novel_circ_000483	ENSBTAG00000018035	8	+	64139283	64151966	708	annot_exons	3
novel_circ_000484	ENSBTAG00000017258	2	+	111080756	111081169	414	one_exon	1
novel_circ_000485	ENSBTAG00000048916	24	-	49209390	49212589	3200	antisense
novel_circ_000486	ENSBTAG00000009918	18	+	11625942	11626141	200	one_exon	1
novel_circ_000487	ENSBTAG00000004271	3	-	16275939	16287552	742	annot_exons	7
novel_circ_000488	ENSBTAG00000001601	10	+	19138102	19141627	3526	antisense
novel_circ_000489	ENSBTAG00000004575	4	-	31586936	31620741	33011	exon_intron
novel_circ_000490	ENSBTAG00000009460	18	-	64753610	64755102	1493	exon_intron
novel_circ_000491	ENSBTAG00000027024	21	+	42518712	42570787	4114	annot_exons	3
novel_circ_000492	ENSBTAG00000040427	26	-	18520164	18521714	347	annot_exons	2
novel_circ_000493	ENSBTAG00000017128	23	+	39770295	39787931	1284	annot_exons	10
novel_circ_000494	ENSBTAG00000017569	20	-	41988161	41993397	643	annot_exons	3
novel_circ_000495	ENSBTAG00000044169	7	-	56943066	56948088	952	annot_exons	2
novel_circ_000496	ENSBTAG00000050156	14	-	64132878	64140121	427	annot_exons	3
novel_circ_000497	ENSBTAG00000006322	15	+	43421113	43421770	658	one_exon	1
novel_circ_000498	ENSBTAG00000001710	22	+	6723803	6726144	2342	intronic
novel_circ_000499	ENSBTAG00000009131	7	-	94765509	94769679	347	exon_intron
novel_circ_000500	ENSBTAG00000002395	1	-	119010219	119024444	1487	annot_exons	9
novel_circ_000501	ENSBTAG00000003109	12	+	18056747	18061713	784	annot_exons	5
novel_circ_000502	ENSBTAG00000034875	6	-	13100212	13101091	350	annot_exons	2
novel_circ_000503	ENSBTAG00000002578	13	-	46866827	46897518	1462	annot_exons	5
novel_circ_000504	ENSBTAG00000018381	19	+	18126435	18128530	401	annot_exons	2
novel_circ_000505	ENSBTAG00000053303	5	+	105620537	105622619	434	annot_exons	3
novel_circ_000506	ENSBTAG00000005137	16	+	71679706	71682808	370	annot_exons	2
novel_circ_000507	ENSBTAG00000044097	2	-	95369842	95378205	575	exon_intron
novel_circ_000508	ENSBTAG00000020626	8	+	82590076	82617238	2913	annot_exons	9
novel_circ_000509	ENSBTAG00000012371	19	+	21505568	21515221	524	annot_exons	4
novel_circ_000510	ENSBTAG00000008432	15	+	51293479	51306810	556	annot_exons	4
novel_circ_000511	ENSBTAG00000016848	1	+	65438866	65439343	478	one_exon	1
novel_circ_000512	NA	27	-	6224280	6224443	164	intergenic
novel_circ_000513	ENSBTAG00000017868	19	+	10547813	10559681	609	annot_exons	5
novel_circ_000514	ENSBTAG00000004495	1	-	136890308	136902876	4665	exon_intron
novel_circ_000515	ENSBTAG00000033680	19	-	62531685	62550550	9995	exon_intron
novel_circ_000516	ENSBTAG00000004631	10	+	70744301	70784353	1534	annot_exons	9
novel_circ_000517	ENSBTAG00000013449	2	-	62151423	62169602	1278	annot_exons	10
novel_circ_000518	ENSBTAG00000019129	1	+	152661043	152666763	421	annot_exons	2
novel_circ_000519	ENSBTAG00000011068	5	-	51074613	51079230	486	annot_exons	4
novel_circ_000520	ENSBTAG00000020079	9	+	96719926	96721292	1367	one_exon	1
novel_circ_000521	ENSBTAG00000011205	14	-	31166013	31168899	524	annot_exons	3
novel_circ_000522	ENSBTAG00000009665	9	+	81837657	81883651	2726	annot_exons	17
novel_circ_000523	ENSBTAG00000016198	5	+	112306941	112307117	177	one_exon	1
novel_circ_000524	ENSBTAG00000016504	3	+	115262105	115271850	363	annot_exons	3
novel_circ_000525	ENSBTAG00000001186	27	-	38261566	38272009	526	annot_exons	4
novel_circ_000526	ENSBTAG00000009998	10	+	81115991	81119885	325	annot_exons	3
novel_circ_000527	ENSBTAG00000018643	21	+	21686643	21687413	321	annot_exons	2
novel_circ_000528	ENSBTAG00000011425	13	-	52182753	52184380	296	annot_exons	3
novel_circ_000529	ENSBTAG00000005514	20	-	58833037	58841351	363	annot_exons	2
novel_circ_000530	NA	8	-	91265345	91276423	11079	intergenic
novel_circ_000531	ENSBTAG00000010672	12	+	76918404	76967469	14994	exon_intron
novel_circ_000532	ENSBTAG00000000024	24	-	49099247	49109966	294	annot_exons	2
novel_circ_000533	ENSBTAG00000006690	15	+	29240256	29253960	1443	annot_exons	8
novel_circ_000534	ENSBTAG00000013955	14	+	3430358	3434226	3869	intronic
novel_circ_000535	ENSBTAG00000007709	26	+	31512402	31538834	1063	annot_exons	2
novel_circ_000536	ENSBTAG00000032839	1	-	70266632	70289666	1066	annot_exons	9
novel_circ_000537	ENSBTAG00000003687	19	-	50040717	50054191	1367	annot_exons	7
novel_circ_000538	ENSBTAG00000000152	11	-	44675050	44675840	447	annot_exons	3
novel_circ_000539	ENSBTAG00000038716	16	-	50518665	50520838	1032	annot_exons	5
novel_circ_000540	ENSBTAG00000012691	27	-	26726150	26737987	385	annot_exons	3
novel_circ_000541	ENSBTAG00000012148	11	+	106636050	106639394	507	annot_exons	3
novel_circ_000542	ENSBTAG00000001771	1	+	149617505	149617664	160	intronic
novel_circ_000543	NA	22	-	1697575	1723982	26408	intergenic
novel_circ_000544	ENSBTAG00000000586	20	+	37068655	37083578	1345	annot_exons	8
novel_circ_000545	ENSBTAG00000052059	14	-	12534849	12535336	488	exon_intron
novel_circ_000546	ENSBTAG00000013271	19	+	33343013	33359673	694	annot_exons	4
novel_circ_000547	ENSBTAG00000016368	11	-	26159745	26179334	1126	annot_exons	12
novel_circ_000548	ENSBTAG00000012357	14	-	64694866	64695553	688	one_exon	1
novel_circ_000549	ENSBTAG00000003419	21	-	44942583	44948098	507	annot_exons	4
novel_circ_000550	ENSBTAG00000009207	4	+	46224738	46270149	1833	annot_exons	13
novel_circ_000551	ENSBTAG00000001652	21	-	14881633	14891526	503	annot_exons	3
novel_circ_000552	ENSBTAG00000011068	5	-	51055558	51080521	1225	annot_exons	9
novel_circ_000553	NA	3	-	58485825	58486631	807	intergenic
novel_circ_000554	ENSBTAG00000012357	14	-	65140081	65196317	1921	annot_exons	12
novel_circ_000555	ENSBTAG00000016414	5	+	32424599	32425069	300	annot_exons	2
novel_circ_000556	ENSBTAG00000016666	24	+	60672266	60677646	429	annot_exons	3
novel_circ_000557	ENSBTAG00000014805	6	+	97244512	97254842	771	annot_exons	5
novel_circ_000558	ENSBTAG00000017549	5	-	18260765	18277189	670	annot_exons	6
novel_circ_000559	ENSBTAG00000054164	24	-	3720520	3732077	372	annot_exons	3
novel_circ_000560	ENSBTAG00000009237	25	-	38328295	38329677	412	annot_exons	2
novel_circ_000561	ENSBTAG00000001533	9	+	45209021	45217664	492	annot_exons	3
novel_circ_000562	ENSBTAG00000014448	25	+	27896950	27901410	622	annot_exons	2
novel_circ_000563	ENSBTAG00000016572	2	-	106482878	106487213	645	annot_exons	5
novel_circ_000564	ENSBTAG00000020829	9	-	66245923	66246216	294	one_exon	1
novel_circ_000565	ENSBTAG00000012299	9	-	76682085	76687655	982	annot_exons	7
novel_circ_000566	ENSBTAG00000001920	1	-	65945295	65988188	2030	annot_exons	13
novel_circ_000567	ENSBTAG00000016932	1	-	45898750	45925198	491	annot_exons	3
novel_circ_000568	ENSBTAG00000011567	10	+	36438075	36440163	1963	annot_exons	2
novel_circ_000569	ENSBTAG00000016648	7	+	43202798	43203002	205	intronic
novel_circ_000570	ENSBTAG00000010976	8	-	43831360	43857880	26521	exon_intron
novel_circ_000571	ENSBTAG00000021254	X	-	51026553	51031259	356	annot_exons	3
novel_circ_000572	NA	6	-	16916662	16917143	482	intergenic
novel_circ_000573	ENSBTAG00000006161	4	-	51620058	51623282	3120	exon_intron
novel_circ_000574	ENSBTAG00000002882	7	-	27136266	27139602	552	annot_exons	3
novel_circ_000575	ENSBTAG00000019682	23	-	27659890	27660502	381	annot_exons	3
novel_circ_000576	ENSBTAG00000004997	8	-	98592058	98592842	785	exon_intron
novel_circ_000577	ENSBTAG00000008403	24	+	35070818	35071151	334	intronic
novel_circ_000578	ENSBTAG00000004502	25	+	2902429	2910160	445	annot_exons	4
novel_circ_000579	ENSBTAG00000012833	21	-	61201395	61203648	352	annot_exons	4
novel_circ_000580	ENSBTAG00000012291	5	+	116997583	117000578	512	annot_exons	2
novel_circ_000581	ENSBTAG00000007860	16	-	76047971	76055456	1129	annot_exons	8
novel_circ_000582	ENSBTAG00000000146	12	+	75204753	75220083	15331	exon_intron
novel_circ_000583	ENSBTAG00000033153	9	-	48267349	48335723	836	annot_exons	5
novel_circ_000584	ENSBTAG00000013812	16	-	12172881	12176699	967	annot_exons	3
novel_circ_000585	ENSBTAG00000016549	23	-	32281463	32341338	1499	annot_exons	10
novel_circ_000586	ENSBTAG00000002663	19	-	11982317	11991070	396	annot_exons	3
novel_circ_000587	ENSBTAG00000009036	19	+	20125119	20127287	352	annot_exons	3
novel_circ_000588	ENSBTAG00000004512	22	-	56556219	56562369	942	annot_exons	5
novel_circ_000589	ENSBTAG00000017788	16	+	33576450	33601684	555	annot_exons	4
novel_circ_000590	ENSBTAG00000007508	11	-	27973554	28035043	1607	annot_exons	11
novel_circ_000591	ENSBTAG00000011333	22	-	7750206	7754843	490	annot_exons	3
novel_circ_000592	ENSBTAG00000019877	3	+	82964293	82984428	1293	annot_exons	10
novel_circ_000593	ENSBTAG00000015931	3	-	91560848	91561863	280	annot_exons	2
novel_circ_000594	ENSBTAG00000019376	1	-	95381753	95406526	215	exon_intron
novel_circ_000595	ENSBTAG00000006031	7	+	90184094	90187455	658	annot_exons	4
novel_circ_000596	ENSBTAG00000001186	27	+	38265073	38265328	256	antisense
novel_circ_000597	ENSBTAG00000046185	21	-	57913323	57915074	1268	annot_exons	2
novel_circ_000598	ENSBTAG00000016313	18	-	48553038	48553456	350	annot_exons	2
novel_circ_000599	ENSBTAG00000026266	24	+	37428273	37527586	93825	exon_intron
novel_circ_000600	ENSBTAG00000025029	7	+	108890072	108893352	361	annot_exons	2
novel_circ_000601	ENSBTAG00000007986	6	-	116661389	116664763	326	annot_exons	3
novel_circ_000602	ENSBTAG00000016368	11	-	26151495	26179334	1358	annot_exons	14
novel_circ_000603	ENSBTAG00000046239	26	+	18219077	18226757	668	annot_exons	4
novel_circ_000604	ENSBTAG00000044063	24	+	25481492	25521244	661	annot_exons	5
novel_circ_000605	ENSBTAG00000019036	24	+	39905228	39906182	401	annot_exons	3
novel_circ_000606	ENSBTAG00000031890	26	+	46448483	46523204	2336	annot_exons	22
novel_circ_000607	ENSBTAG00000002620	28	-	24824210	24844580	1202	annot_exons	7
novel_circ_000608	ENSBTAG00000016737	12	-	33098681	33120544	442	annot_exons	4
novel_circ_000609	ENSBTAG00000004997	8	-	98579186	98584904	569	annot_exons	4
novel_circ_000610	ENSBTAG00000016999	1	+	135109176	135158085	1381	annot_exons	13
novel_circ_000611	ENSBTAG00000019855	X	+	123674403	123679956	492	annot_exons	3
novel_circ_000612	ENSBTAG00000015792	5	+	60938880	60949885	385	annot_exons	3
novel_circ_000613	ENSBTAG00000043546	MT	-	13949	14098	150	one_exon	1
novel_circ_000614	ENSBTAG00000001126	6	+	93602344	93625064	1105	annot_exons	8
novel_circ_000615	ENSBTAG00000011187	6	+	35734619	35760983	578	annot_exons	3
novel_circ_000616	ENSBTAG00000009732	8	+	62854527	62856788	516	annot_exons	4
novel_circ_000617	ENSBTAG00000008862	1	-	66201399	66215011	1412	annot_exons	9
novel_circ_000618	ENSBTAG00000048107	7	-	1614280	1616383	487	annot_exons	3
novel_circ_000619	ENSBTAG00000002902	5	-	34912198	34929068	495	annot_exons	4
novel_circ_000620	ENSBTAG00000002171	9	+	9596334	9609518	794	annot_exons	7
novel_circ_000621	ENSBTAG00000000695	8	-	75363402	75422864	1311	annot_exons	12
novel_circ_000622	ENSBTAG00000005946	1	-	87431631	87457859	637	annot_exons	5
novel_circ_000623	ENSBTAG00000047550	8	+	38717330	38741975	1619	annot_exons	2
novel_circ_000624	ENSBTAG00000017279	24	+	41912164	41915779	338	annot_exons	3
novel_circ_000625	ENSBTAG00000020126	20	+	56464474	56466364	982	annot_exons	2
novel_circ_000626	ENSBTAG00000020707	9	+	79863923	79871847	345	annot_exons	4
novel_circ_000627	ENSBTAG00000032848	20	+	41472666	41475890	247	annot_exons	2
novel_circ_000628	ENSBTAG00000020316	19	-	14684729	14751905	2502	annot_exons	17
novel_circ_000629	ENSBTAG00000002455	6	-	102084399	102093416	1089	annot_exons	3
novel_circ_000630	ENSBTAG00000001342	10	+	55105067	55106585	1071	annot_exons	2
novel_circ_000631	ENSBTAG00000018216	24	+	49980857	49988921	501	annot_exons	5
novel_circ_000632	ENSBTAG00000013830	10	+	58413071	58415860	867	annot_exons	2
novel_circ_000633	ENSBTAG00000017128	23	+	39770295	39799908	1735	annot_exons	14
novel_circ_000634	ENSBTAG00000009315	29	-	29354896	29386579	2690	annot_exons	13
novel_circ_000635	ENSBTAG00000000267	19	-	23174631	23174832	202	one_exon	1
novel_circ_000636	ENSBTAG00000020286	24	+	24901200	24902372	1173	one_exon	1
novel_circ_000637	ENSBTAG00000000125	17	-	34643695	34675179	471	annot_exons	4
novel_circ_000638	ENSBTAG00000004645	21	-	24177034	24187869	1329	annot_exons	3
novel_circ_000639	ENSBTAG00000008575	10	-	52875444	52875612	169	one_exon	1
novel_circ_000640	ENSBTAG00000008300	2	-	103399906	103408271	1434	annot_exons	8
novel_circ_000641	ENSBTAG00000024199	4	-	114704708	114714131	450	annot_exons	3
novel_circ_000642	ENSBTAG00000002651	5	+	77027182	77041885	344	annot_exons	2
novel_circ_000643	ENSBTAG00000005436	22	+	28850697	28876796	574	annot_exons	5
novel_circ_000644	ENSBTAG00000012251	28	+	9522027	9542323	799	annot_exons	7
novel_circ_000645	ENSBTAG00000011125	7	-	5968956	5969863	908	one_exon	1
novel_circ_000646	ENSBTAG00000012454	3	-	43263993	43268459	483	annot_exons	3
novel_circ_000647	ENSBTAG00000018548	16	+	71486252	71498632	508	annot_exons	4
novel_circ_000648	NA	19	+	26765509	26766498	990	intergenic
novel_circ_000649	ENSBTAG00000021841	14	+	26416384	26431203	402	annot_exons	4
novel_circ_000650	ENSBTAG00000000771	4	+	118647759	118651336	372	annot_exons	4
novel_circ_000651	ENSBTAG00000021196	5	+	68532826	68535790	264	annot_exons	2
novel_circ_000652	ENSBTAG00000015527	19	+	17390517	17396372	5856	intronic
novel_circ_000653	ENSBTAG00000019458	11	-	36440785	36444372	427	annot_exons	3
novel_circ_000654	ENSBTAG00000012482	22	+	54120135	54122078	735	annot_exons	2
novel_circ_000655	ENSBTAG00000043999	11	-	4595636	4597174	188	annot_exons	2
novel_circ_000656	ENSBTAG00000006122	X	-	91076093	91116666	720	annot_exons	6
novel_circ_000657	ENSBTAG00000015588	4	-	93978533	93980041	444	annot_exons	2
novel_circ_000658	ENSBTAG00000005362	23	+	3019707	3022633	306	annot_exons	2
novel_circ_000659	ENSBTAG00000005221	5	+	107633565	107643676	552	annot_exons	3
novel_circ_000660	ENSBTAG00000009351	5	+	116069561	116094098	782	annot_exons	6
novel_circ_000661	ENSBTAG00000010945	6	-	15829403	15831950	512	annot_exons	4
novel_circ_000662	ENSBTAG00000005869	9	+	15343365	15353617	7854	exon_intron
novel_circ_000663	ENSBTAG00000020681	12	+	18748997	18767911	214	annot_exons	2
novel_circ_000664	ENSBTAG00000010819	8	-	9746154	9754094	563	annot_exons	2
novel_circ_000665	ENSBTAG00000021953	5	-	72101551	72135584	509	annot_exons	3
novel_circ_000666	ENSBTAG00000003372	4	-	97943851	97956078	596	annot_exons	7
novel_circ_000667	ENSBTAG00000005016	10	-	9292113	9306386	151	annot_exons	2
novel_circ_000668	ENSBTAG00000001657	29	+	9542553	9552717	10165	exon_intron
novel_circ_000669	ENSBTAG00000034522	17	+	11787491	11796317	213	annot_exons	2
novel_circ_000670	ENSBTAG00000007102	5	+	116620947	116621908	295	annot_exons	2
novel_circ_000671	ENSBTAG00000016915	12	+	31656948	31657867	327	annot_exons	2
novel_circ_000672	ENSBTAG00000000878	14	-	21513185	21523152	1327	annot_exons	7
novel_circ_000673	ENSBTAG00000019866	13	+	19740931	19749513	477	annot_exons	2
novel_circ_000674	ENSBTAG00000021686	8	+	60780005	60787599	605	annot_exons	6
novel_circ_000675	ENSBTAG00000003501	22	-	53607318	53611518	301	annot_exons	3
novel_circ_000676	ENSBTAG00000027569	6	-	59783468	59826222	485	annot_exons	5
novel_circ_000677	NA	27	+	6220659	6222641	1983	intergenic
novel_circ_000678	ENSBTAG00000014818	18	-	15058719	15062912	898	annot_exons	5
novel_circ_000679	ENSBTAG00000017439	5	+	110930789	110931145	357	one_exon	1
novel_circ_000680	ENSBTAG00000013224	9	-	88479649	88480163	515	one_exon	1
novel_circ_000681	ENSBTAG00000031891	1	-	93663679	93669823	6145	exon_intron
novel_circ_000682	ENSBTAG00000003710	12	+	35719120	35728479	541	annot_exons	4
novel_circ_000683	ENSBTAG00000009676	3	-	120612699	120617967	1568	annot_exons	10
novel_circ_000684	ENSBTAG00000011095	5	-	80297839	80337684	1167	exon_intron
novel_circ_000685	ENSBTAG00000039172	11	+	94123536	94175392	1906	annot_exons	13
novel_circ_000686	ENSBTAG00000007841	18	+	44889944	44890100	157	intronic
novel_circ_000687	NA	12	+	30546298	30547614	1317	intergenic
novel_circ_000688	ENSBTAG00000015891	3	-	99758568	99759037	470	exon_intron
novel_circ_000689	ENSBTAG00000014021	4	+	102820710	102827911	803	annot_exons	4
novel_circ_000690	ENSBTAG00000018924	22	+	50946075	50954261	1486	annot_exons	4
novel_circ_000691	ENSBTAG00000010694	28	+	14286166	14300660	1412	annot_exons	4
novel_circ_000692	ENSBTAG00000017266	2	-	24128444	24138103	1087	annot_exons	7
novel_circ_000693	ENSBTAG00000006027	11	-	59873578	59880055	826	annot_exons	7
novel_circ_000694	ENSBTAG00000014548	16	-	65916159	65931491	415	annot_exons	3
novel_circ_000695	ENSBTAG00000006767	14	-	81759393	81782223	488	annot_exons	5
novel_circ_000696	ENSBTAG00000044190	14	-	70484257	70486303	381	annot_exons	3
novel_circ_000697	ENSBTAG00000009139	24	+	43420146	43429866	592	annot_exons	2
novel_circ_000698	ENSBTAG00000017164	5	-	29469020	29480409	470	annot_exons	4
novel_circ_000699	ENSBTAG00000007147	19	-	8687355	8691967	655	annot_exons	2
novel_circ_000700	ENSBTAG00000020567	11	-	20923194	20935537	685	annot_exons	6
novel_circ_000701	ENSBTAG00000006161	4	-	51703801	51705017	1217	one_exon	1
novel_circ_000702	ENSBTAG00000017407	1	-	143692479	143710246	505	annot_exons	4
novel_circ_000703	ENSBTAG00000001391	29	-	12447863	12468136	732	annot_exons	5
novel_circ_000704	ENSBTAG00000010542	24	-	42911202	42912506	217	annot_exons	2
novel_circ_000705	ENSBTAG00000003552	29	-	1016462	1039763	1494	annot_exons	10
novel_circ_000706	ENSBTAG00000018879	23	-	3083829	3090823	2029	annot_exons	4
novel_circ_000707	NA	X	-	102943979	102975773	31795	intergenic
novel_circ_000708	ENSBTAG00000003354	24	+	36970367	36976886	825	annot_exons	5
novel_circ_000709	ENSBTAG00000039121	2	+	121807679	121810656	784	exon_intron
novel_circ_000710	ENSBTAG00000011770	8	-	45335364	45336556	1193	antisense
novel_circ_000711	ENSBTAG00000019197	13	-	42990243	42990956	389	annot_exons	4
novel_circ_000712	ENSBTAG00000003111	15	+	17867656	17870458	569	annot_exons	3
novel_circ_000713	ENSBTAG00000008438	17	-	4771654	4817286	800	annot_exons	6
novel_circ_000714	ENSBTAG00000001398	17	-	54264818	54264948	131	antisense
novel_circ_000715	ENSBTAG00000021592	27	+	27164599	27165019	421	one_exon	1
novel_circ_000716	ENSBTAG00000032603	12	-	69506051	69516138	831	annot_exons	6
novel_circ_000717	ENSBTAG00000001509	5	+	60532483	60533262	780	one_exon	1
novel_circ_000718	ENSBTAG00000034998	10	-	5051894	5054138	282	annot_exons	2
novel_circ_000719	ENSBTAG00000021735	11	+	68868149	68869198	1050	exon_intron
novel_circ_000720	ENSBTAG00000018460	20	-	67883978	67892994	1052	annot_exons	7
novel_circ_000721	ENSBTAG00000019437	19	+	14810232	14812633	1199	annot_exons	2
novel_circ_000722	ENSBTAG00000020707	9	+	79881670	79885072	261	annot_exons	2
novel_circ_000723	ENSBTAG00000023259	24	+	32375195	32467693	857	annot_exons	6
novel_circ_000724	ENSBTAG00000004368	18	+	35549222	35552259	1298	annot_exons	2
novel_circ_000725	ENSBTAG00000013145	27	+	33394858	33413492	1444	annot_exons	11
novel_circ_000726	ENSBTAG00000054628	13	+	58529019	58540629	4046	exon_intron
novel_circ_000727	ENSBTAG00000004387	13	-	35241852	35255021	1071	annot_exons	5
novel_circ_000728	ENSBTAG00000015240	2	+	133501316	133501514	199	one_exon	1
novel_circ_000729	ENSBTAG00000012519	11	-	14179248	14179762	338	annot_exons	2
novel_circ_000730	ENSBTAG00000007321	20	-	13458736	13467998	1111	exon_intron
novel_circ_000731	ENSBTAG00000010351	27	+	15553909	15563869	662	annot_exons	4
novel_circ_000732	ENSBTAG00000016804	28	-	8522923	8526060	3138	exon_intron
novel_circ_000733	ENSBTAG00000000579	20	-	37254535	37256160	1626	one_exon	1
novel_circ_000734	ENSBTAG00000014768	4	-	112230995	112238879	2179	annot_exons	3
novel_circ_000735	ENSBTAG00000017729	5	-	24724170	24740614	1105	annot_exons	8
novel_circ_000736	ENSBTAG00000024708	17	+	71385905	71393247	629	annot_exons	3
novel_circ_000737	ENSBTAG00000000683	13	-	46291902	46312046	1278	annot_exons	11
novel_circ_000738	ENSBTAG00000003245	3	+	49792608	49821201	368	annot_exons	2
novel_circ_000739	ENSBTAG00000017753	1	+	10418538	10434862	359	annot_exons	3
novel_circ_000740	ENSBTAG00000010153	6	+	93339387	93355089	436	annot_exons	5
novel_circ_000741	ENSBTAG00000010956	6	-	91076338	91085226	429	annot_exons	3
novel_circ_000742	ENSBTAG00000015333	14	-	81234540	81237963	493	annot_exons	3
novel_circ_000743	ENSBTAG00000017162	2	+	27995619	28027673	20875	exon_intron
novel_circ_000744	NA	27	-	6223593	6224559	967	intergenic
novel_circ_000745	ENSBTAG00000004805	18	-	15640859	15643693	260	annot_exons	2
novel_circ_000746	ENSBTAG00000027932	11	+	15028179	15050006	2148	annot_exons	14
novel_circ_000747	ENSBTAG00000008617	15	-	63730353	63735510	712	annot_exons	6
novel_circ_000748	ENSBTAG00000004745	17	-	18326849	18328400	343	annot_exons	2
novel_circ_000749	ENSBTAG00000015739	19	+	47076425	47078974	1002	annot_exons	5
novel_circ_000750	ENSBTAG00000015519	20	+	6770801	6773105	330	annot_exons	3
novel_circ_000751	ENSBTAG00000011626	1	-	138948031	138949521	228	annot_exons	2
novel_circ_000752	ENSBTAG00000009426	4	-	112039038	112057422	1184	annot_exons	8
novel_circ_000753	ENSBTAG00000046612	9	-	62670201	62673017	370	annot_exons	3
novel_circ_000754	NA	11	-	5475084	5483488	8405	intergenic
novel_circ_000755	ENSBTAG00000006837	6	-	83364268	83375215	579	annot_exons	6
novel_circ_000756	ENSBTAG00000002411	15	-	81010564	81010794	231	antisense
novel_circ_000757	ENSBTAG00000011244	3	+	100611907	100648989	434	annot_exons	2
novel_circ_000758	ENSBTAG00000019545	12	+	34245996	34248361	511	annot_exons	2
novel_circ_000759	NA	8	+	111168779	111169333	555	intergenic
novel_circ_000760	ENSBTAG00000010694	28	+	14072404	14075486	3083	exon_intron
novel_circ_000761	ENSBTAG00000007272	17	-	51963038	51966775	729	annot_exons	5
novel_circ_000762	ENSBTAG00000018408	9	+	63906118	63919641	887	annot_exons	8
novel_circ_000763	ENSBTAG00000004742	1	-	147016493	147063223	454	annot_exons	3
novel_circ_000764	ENSBTAG00000021972	20	+	59281947	59283478	438	annot_exons	2
novel_circ_000765	ENSBTAG00000010388	11	-	3893761	3906141	443	annot_exons	3
novel_circ_000766	NA	27	+	6220504	6222641	2138	intergenic
novel_circ_000767	ENSBTAG00000006449	25	+	18586730	18595539	337	annot_exons	3
novel_circ_000768	ENSBTAG00000003954	3	+	15152051	15199689	5591	annot_exons	4
novel_circ_000769	ENSBTAG00000014044	5	+	24905477	24914624	750	annot_exons	4
novel_circ_000770	ENSBTAG00000015527	19	+	17439449	17500310	1723	annot_exons	13
novel_circ_000771	ENSBTAG00000017626	11	-	67748033	67756343	342	annot_exons	3
novel_circ_000772	ENSBTAG00000016228	1	-	106175892	106184745	442	annot_exons	4
novel_circ_000773	NA	29	-	40392063	40392452	390	intergenic
novel_circ_000774	ENSBTAG00000004024	21	+	31137660	31157019	642	annot_exons	7
novel_circ_000775	ENSBTAG00000015713	19	+	46979752	46986181	437	annot_exons	4
novel_circ_000776	ENSBTAG00000010763	5	+	97282682	97284537	730	annot_exons	2
novel_circ_000777	ENSBTAG00000039709	5	+	65994887	66020838	2427	exon_intron
novel_circ_000778	NA	4	-	51613132	51620288	7157	intergenic
novel_circ_000779	ENSBTAG00000007723	24	-	61625768	61632754	309	annot_exons	4
novel_circ_000780	ENSBTAG00000015200	10	-	43177987	43189741	656	annot_exons	5
novel_circ_000781	ENSBTAG00000021538	10	+	51152153	51159243	600	annot_exons	4
novel_circ_000782	ENSBTAG00000043987	8	-	38029251	38033518	242	annot_exons	2
novel_circ_000783	ENSBTAG00000014181	10	-	51257820	51282039	1190	annot_exons	3
novel_circ_000784	ENSBTAG00000015277	29	-	12481285	12501155	4880	exon_intron
novel_circ_000785	ENSBTAG00000007962	13	-	79481099	79493794	630	annot_exons	4
novel_circ_000786	ENSBTAG00000013769	1	+	55950068	55977653	1075	annot_exons	5
novel_circ_000787	ENSBTAG00000008025	4	+	118534000	118536619	424	annot_exons	4
novel_circ_000788	ENSBTAG00000011761	5	+	97652048	97666488	1449	annot_exons	6
novel_circ_000789	ENSBTAG00000003954	3	+	15121689	15122209	521	exon_intron
novel_circ_000790	ENSBTAG00000010693	12	+	50871939	50875321	526	annot_exons	4
novel_circ_000791	ENSBTAG00000000683	13	-	46289886	46312046	1662	annot_exons	13
novel_circ_000792	ENSBTAG00000027321	3	-	50166352	50232750	13777	exon_intron
novel_circ_000793	ENSBTAG00000046520	13	+	54530214	54535096	552	annot_exons	3
novel_circ_000794	ENSBTAG00000009426	4	-	112039038	112045370	752	annot_exons	5
novel_circ_000795	NA	27	-	6220415	6221073	659	intergenic
novel_circ_000796	ENSBTAG00000005016	10	-	9213897	9234077	708	annot_exons	7
novel_circ_000797	ENSBTAG00000020015	16	-	49214597	49225997	1047	annot_exons	6
novel_circ_000798	ENSBTAG00000018088	24	+	44298867	44299511	645	one_exon	1
novel_circ_000799	ENSBTAG00000005915	13	+	16496980	16498437	241	annot_exons	2
novel_circ_000800	ENSBTAG00000013769	1	+	55939376	55950185	757	annot_exons	3
novel_circ_000801	ENSBTAG00000010012	20	+	8121642	8122420	779	antisense
novel_circ_000802	ENSBTAG00000001533	9	+	45182770	45192352	389	annot_exons	4
novel_circ_000803	ENSBTAG00000030817	4	-	118216211	118222364	345	annot_exons	4
novel_circ_000804	ENSBTAG00000006443	15	+	75201589	75202795	1207	exon_intron
novel_circ_000805	NA	27	+	6220659	6225993	5335	intergenic
novel_circ_000806	ENSBTAG00000017419	3	+	67023383	67025260	288	annot_exons	2
novel_circ_000807	ENSBTAG00000008153	16	+	79435633	79438824	246	annot_exons	2
novel_circ_000808	ENSBTAG00000007139	17	+	57138243	57141004	564	annot_exons	2
novel_circ_000809	ENSBTAG00000021845	21	-	41546663	41549927	3265	intronic
novel_circ_000810	ENSBTAG00000020282	27	-	13902306	13902912	251	annot_exons	2
novel_circ_000811	ENSBTAG00000052059	14	-	12458644	12459108	465	one_exon	1
novel_circ_000812	ENSBTAG00000011156	6	-	61277416	61297367	889	annot_exons	8
novel_circ_000813	ENSBTAG00000015887	3	+	103927120	103939820	400	annot_exons	2
novel_circ_000814	ENSBTAG00000021372	6	+	91840141	91856779	811	annot_exons	5
novel_circ_000815	ENSBTAG00000027569	6	-	59783468	59786145	275	annot_exons	2
novel_circ_000816	ENSBTAG00000019498	19	-	36582347	36582947	313	annot_exons	3
novel_circ_000817	ENSBTAG00000053398	10	+	36203542	36203875	87	annot_exons	2
novel_circ_000818	ENSBTAG00000019644	15	+	74221544	74238640	1203	annot_exons	6
novel_circ_000819	ENSBTAG00000019197	13	-	42990243	43005855	930	annot_exons	9
novel_circ_000820	ENSBTAG00000000288	13	+	12360558	12382714	1362	annot_exons	8
novel_circ_000821	ENSBTAG00000021968	X	+	56465098	56529057	1069	annot_exons	4
novel_circ_000822	ENSBTAG00000011578	15	+	65684594	65689625	300	annot_exons	2
novel_circ_000823	ENSBTAG00000033089	13	-	32060378	32067529	527	annot_exons	5
novel_circ_000824	ENSBTAG00000046760	5	-	119219826	119240484	2370	exon_intron
novel_circ_000825	ENSBTAG00000011593	9	+	98859931	98867884	7954	exon_intron
novel_circ_000826	ENSBTAG00000004177	2	-	37210319	37211659	318	annot_exons	2
novel_circ_000827	ENSBTAG00000002603	21	+	54823352	54838331	2012	annot_exons	12
novel_circ_000828	ENSBTAG00000009426	4	-	112039053	112056740	1045	annot_exons	7
novel_circ_000829	ENSBTAG00000014255	4	+	10622748	10647235	840	annot_exons	10
novel_circ_000830	ENSBTAG00000002232	1	-	126274923	126276847	284	annot_exons	2
novel_circ_000831	ENSBTAG00000016577	25	-	346224	347292	1069	exon_intron
novel_circ_000832	ENSBTAG00000008736	4	+	111953165	111965981	12817	exon_intron
novel_circ_000833	ENSBTAG00000021975	3	-	83910165	83914234	559	annot_exons	4
novel_circ_000834	ENSBTAG00000048151	2	+	43513715	43525185	1304	annot_exons	12
novel_circ_000835	ENSBTAG00000021999	29	-	46203693	46206780	294	annot_exons	2
novel_circ_000836	ENSBTAG00000049835	14	-	12564591	12593361	17697	exon_intron
novel_circ_000837	ENSBTAG00000019545	12	+	34280033	34282774	2742	intronic
novel_circ_000838	ENSBTAG00000012565	10	+	82583563	82585269	1707	one_exon	1
novel_circ_000839	ENSBTAG00000052980	23	-	7286429	7286638	210	antisense
novel_circ_000840	ENSBTAG00000019451	6	-	111405358	111416264	10907	exon_intron
novel_circ_000841	ENSBTAG00000015875	5	+	106899967	106900208	242	one_exon	1
novel_circ_000842	ENSBTAG00000008416	22	+	15606620	15625636	1074	annot_exons	6
novel_circ_000843	ENSBTAG00000016368	11	-	26193989	26195642	323	annot_exons	2
novel_circ_000844	ENSBTAG00000017788	16	+	33576450	33583816	252	annot_exons	2
novel_circ_000845	ENSBTAG00000012265	5	+	104293463	104301373	2398	annot_exons	8
novel_circ_000846	ENSBTAG00000009207	4	+	46241293	46245942	426	annot_exons	3
novel_circ_000847	ENSBTAG00000018272	16	+	44858433	44874727	1311	exon_intron
novel_circ_000848	ENSBTAG00000035265	17	-	180310	182370	1745	exon_intron
novel_circ_000849	ENSBTAG00000005086	13	+	66915253	66940189	737	annot_exons	6
novel_circ_000850	ENSBTAG00000021661	5	+	62814638	62821903	511	annot_exons	4
novel_circ_000851	ENSBTAG00000008805	10	-	46455047	46485029	670	annot_exons	7
novel_circ_000852	ENSBTAG00000007566	16	+	33922009	33931690	236	annot_exons	2
novel_circ_000853	ENSBTAG00000021614	13	-	7233087	7238335	356	annot_exons	3
novel_circ_000854	ENSBTAG00000006214	8	-	70430371	70448169	730	annot_exons	4
novel_circ_000855	ENSBTAG00000001133	12	-	11995365	12012892	942	annot_exons	8
novel_circ_000856	ENSBTAG00000007374	10	-	9626174	9693504	67331	exon_intron
novel_circ_000857	ENSBTAG00000025003	27	-	37814260	37825741	856	annot_exons	6
novel_circ_000858	ENSBTAG00000011252	7	-	21821637	21826121	879	annot_exons	5
novel_circ_000859	ENSBTAG00000011586	8	+	83161913	83171390	478	annot_exons	4
novel_circ_000860	ENSBTAG00000021661	5	-	62851259	62851700	442	antisense
novel_circ_000861	ENSBTAG00000016281	9	+	44644751	44655546	494	annot_exons	3
novel_circ_000862	ENSBTAG00000019354	11	-	46941711	46944062	364	annot_exons	2
novel_circ_000863	ENSBTAG00000003552	29	-	1036136	1039763	609	annot_exons	4
novel_circ_000864	ENSBTAG00000030977	19	+	33815630	33829883	12201	exon_intron
novel_circ_000865	ENSBTAG00000003183	5	-	60084107	60111804	595	annot_exons	3
novel_circ_000866	ENSBTAG00000016105	7	-	46847798	46848546	305	annot_exons	2
novel_circ_000867	ENSBTAG00000039922	6	-	55624594	55625645	1052	one_exon	1
novel_circ_000868	NA	25	+	23355009	23371595	16587	intergenic
novel_circ_000869	ENSBTAG00000010818	5	-	90483392	90507724	503	annot_exons	3
novel_circ_000870	ENSBTAG00000020281	10	-	43664948	43690568	546	annot_exons	4
novel_circ_000871	ENSBTAG00000011904	X	-	37156092	37200891	31094	exon_intron
novel_circ_000872	ENSBTAG00000023675	1	+	36142298	36142448	151	intronic
novel_circ_000873	ENSBTAG00000031171	3	-	57280825	57302650	752	annot_exons	8
novel_circ_000874	ENSBTAG00000020018	9	+	34653805	34691133	962	annot_exons	6
novel_circ_000875	ENSBTAG00000000146	12	+	75212461	75220083	7623	exon_intron
novel_circ_000876	ENSBTAG00000004448	15	-	76730976	76734170	520	annot_exons	4
novel_circ_000877	ENSBTAG00000032234	12	-	75512670	75512900	231	one_exon	1
novel_circ_000878	ENSBTAG00000001343	3	+	76783472	76788676	713	annot_exons	4
novel_circ_000879	ENSBTAG00000003381	20	-	66452113	66466592	2902	annot_exons	10
novel_circ_000880	ENSBTAG00000005595	5	+	116639805	116642612	396	annot_exons	3
novel_circ_000881	ENSBTAG00000023929	11	+	71341947	71342123	177	antisense
novel_circ_000882	ENSBTAG00000003876	28	+	28807556	28813164	5609	intronic
novel_circ_000883	ENSBTAG00000012818	6	-	29913905	29916580	237	annot_exons	2
novel_circ_000884	ENSBTAG00000003375	21	-	56479529	56508972	11548	exon_intron
novel_circ_000885	ENSBTAG00000019255	2	+	19645555	19647513	546	annot_exons	3
novel_circ_000886	ENSBTAG00000008465	15	+	74177644	74187897	796	annot_exons	5
novel_circ_000887	ENSBTAG00000020193	26	-	34300779	34302470	1692	one_exon	1
novel_circ_000888	ENSBTAG00000014112	4	+	96963240	96974539	385	annot_exons	2
novel_circ_000889	ENSBTAG00000039509	5	-	96965516	96966444	929	one_exon	1
novel_circ_000890	ENSBTAG00000017592	6	+	98349452	98350149	209	annot_exons	2
novel_circ_000891	ENSBTAG00000005501	2	+	31551933	31552378	335	annot_exons	2
novel_circ_000892	ENSBTAG00000012447	11	-	70977637	70993232	1062	annot_exons	7
novel_circ_000893	ENSBTAG00000018463	13	+	31655148	31657869	147	annot_exons	2
novel_circ_000894	ENSBTAG00000014463	6	-	11932779	11933120	342	antisense
novel_circ_000895	ENSBTAG00000004190	3	+	49256642	49256878	237	one_exon	1
novel_circ_000896	NA	X	+	50012619	50013183	565	intergenic
novel_circ_000897	ENSBTAG00000014807	10	-	12387508	12391944	515	annot_exons	4
novel_circ_000898	ENSBTAG00000019954	21	+	20593079	20594561	1483	intronic
novel_circ_000899	ENSBTAG00000016805	6	-	17314087	17381750	64144	exon_intron
novel_circ_000900	ENSBTAG00000017729	5	-	24728303	24742566	1041	annot_exons	7
novel_circ_000901	ENSBTAG00000011656	13	-	53844740	53846837	161	annot_exons	2
novel_circ_000902	NA	19	-	62448829	62514605	65777	intergenic
novel_circ_000903	ENSBTAG00000010760	9	+	38940536	39008741	654	annot_exons	5
novel_circ_000904	ENSBTAG00000007668	9	-	96869271	96869534	264	one_exon	1
novel_circ_000905	ENSBTAG00000011761	5	+	97654536	97679839	1971	annot_exons	9
novel_circ_000906	ENSBTAG00000014764	5	+	104146763	104149624	2862	antisense
novel_circ_000907	ENSBTAG00000021769	2	-	112659829	112682197	22369	exon_intron
novel_circ_000908	ENSBTAG00000021372	6	+	91840141	91848588	383	annot_exons	2
novel_circ_000909	ENSBTAG00000015894	18	+	5319993	5320160	168	intronic
novel_circ_000910	ENSBTAG00000050426	11	+	97180943	97193918	350	annot_exons	3
novel_circ_000911	ENSBTAG00000015905	29	-	32435264	32449774	328	annot_exons	4
novel_circ_000912	ENSBTAG00000015076	9	-	86878468	86883492	622	annot_exons	2
novel_circ_000913	ENSBTAG00000014636	18	+	38198109	38200900	2792	one_exon	1
novel_circ_000914	ENSBTAG00000024822	11	-	102361303	102364376	375	annot_exons	3
novel_circ_000915	ENSBTAG00000018114	2	-	48287658	48316688	1161	annot_exons	8
novel_circ_000916	ENSBTAG00000000260	4	-	65962243	65971566	448	annot_exons	3
novel_circ_000917	NA	14	-	60454273	60500256	45984	intergenic
novel_circ_000918	ENSBTAG00000000700	15	-	40202787	40204660	1874	intronic
novel_circ_000919	ENSBTAG00000003034	7	-	3851342	3874077	358	annot_exons	2
novel_circ_000920	ENSBTAG00000001504	6	+	115793198	115797030	678	annot_exons	5
novel_circ_000921	ENSBTAG00000011744	25	-	20773920	20778835	601	annot_exons	5
novel_circ_000922	ENSBTAG00000003555	11	-	25772280	25802448	833	annot_exons	6
novel_circ_000923	ENSBTAG00000017266	2	-	24121762	24122175	161	annot_exons	2
novel_circ_000924	ENSBTAG00000010428	5	-	51216812	51249962	592	annot_exons	5
novel_circ_000925	ENSBTAG00000005393	3	-	390557	447472	628	annot_exons	5
novel_circ_000926	ENSBTAG00000000586	20	+	37050036	37056624	694	annot_exons	4
novel_circ_000927	ENSBTAG00000015192	7	-	39030633	39037105	1305	annot_exons	5
novel_circ_000928	ENSBTAG00000054497	1	-	1370245	1391377	18003	exon_intron
novel_circ_000929	ENSBTAG00000003381	20	-	66455852	66458192	560	annot_exons	4
novel_circ_000930	ENSBTAG00000015683	7	+	44617835	44624195	322	annot_exons	3
novel_circ_000931	ENSBTAG00000006672	9	+	63834313	63835686	342	annot_exons	2
novel_circ_000932	ENSBTAG00000015593	19	+	25250294	25254817	2722	exon_intron
novel_circ_000933	ENSBTAG00000001600	6	+	67740025	67764471	481	annot_exons	6
novel_circ_000934	ENSBTAG00000018697	X	+	2580641	2582675	227	annot_exons	2
novel_circ_000935	ENSBTAG00000006209	14	+	46436339	46451003	455	annot_exons	4
novel_circ_000936	ENSBTAG00000054322	18	-	59439767	59499993	60227	exon_intron
novel_circ_000937	ENSBTAG00000007386	14	+	55118588	55140241	1026	annot_exons	6
novel_circ_000938	ENSBTAG00000016230	X	+	71788958	71805998	1287	annot_exons	8
novel_circ_000939	ENSBTAG00000006751	10	+	10637915	10657947	743	annot_exons	8
novel_circ_000940	ENSBTAG00000044158	15	+	66514227	66580724	408	annot_exons	3
novel_circ_000941	NA	27	+	6220659	6224568	3910	intergenic
novel_circ_000942	ENSBTAG00000016600	11	+	10153498	10153915	281	annot_exons	2
novel_circ_000943	ENSBTAG00000003954	3	+	15170744	15199689	3184	exon_intron
novel_circ_000944	ENSBTAG00000003752	3	+	35054068	35076802	788	annot_exons	6
novel_circ_000945	NA	27	-	6220426	6220786	361	intergenic
novel_circ_000946	ENSBTAG00000011337	20	-	62692563	62693423	861	intronic
novel_circ_000947	ENSBTAG00000014289	3	-	94107519	94114429	2202	annot_exons	2
novel_circ_000948	ENSBTAG00000001223	8	+	17336097	17359280	436	annot_exons	4
novel_circ_000949	ENSBTAG00000015955	20	+	4693788	4696739	224	annot_exons	2
novel_circ_000950	ENSBTAG00000046348	8	+	20364617	20367744	338	annot_exons	3
novel_circ_000951	ENSBTAG00000039435	5	-	48599336	48600447	1112	intronic
novel_circ_000952	ENSBTAG00000003419	21	-	44946734	44948098	275	annot_exons	2
novel_circ_000953	ENSBTAG00000044029	10	+	28546325	28575606	29282	exon_intron
novel_circ_000954	ENSBTAG00000014181	10	-	51281141	51282039	899	one_exon	1
novel_circ_000955	ENSBTAG00000010664	13	+	17013184	17040279	1235	annot_exons	10
novel_circ_000956	ENSBTAG00000004011	10	-	61041598	61045205	213	annot_exons	2
novel_circ_000957	ENSBTAG00000003040	13	+	67400371	67402327	545	annot_exons	3
novel_circ_000958	NA	27	+	6220646	6222905	2260	intergenic
novel_circ_000959	ENSBTAG00000014178	13	-	39918310	39918855	546	exon_intron
novel_circ_000960	ENSBTAG00000054578	12	-	50571022	50579654	2178	annot_exons	3
novel_circ_000961	ENSBTAG00000000616	3	+	549133	561292	1643	annot_exons	5
novel_circ_000962	ENSBTAG00000011904	X	-	37156092	37206066	36269	exon_intron
novel_circ_000963	ENSBTAG00000007385	10	+	28506068	28506261	194	one_exon	1
novel_circ_000964	ENSBTAG00000000291	13	-	12249101	12256109	1060	annot_exons	6
novel_circ_000965	ENSBTAG00000048271	5	-	109230071	109230841	258	annot_exons	2
novel_circ_000966	ENSBTAG00000002341	29	-	31836432	31836692	261	one_exon	1
novel_circ_000967	ENSBTAG00000010693	12	+	50853139	50875321	1529	annot_exons	8
novel_circ_000968	NA	13	+	22739013	22739277	265	intergenic
novel_circ_000969	ENSBTAG00000048916	24	+	49217191	49232999	917	annot_exons	5
novel_circ_000970	ENSBTAG00000023745	18	+	13399322	13405618	431	annot_exons	3
novel_circ_000971	ENSBTAG00000020700	16	-	41858897	41862260	301	annot_exons	3
novel_circ_000972	NA	27	-	6220889	6222478	1590	intergenic
novel_circ_000973	ENSBTAG00000001533	9	+	45166360	45192352	540	exon_intron
novel_circ_000974	ENSBTAG00000021069	8	+	10971059	10976586	443	annot_exons	3
novel_circ_000975	ENSBTAG00000030881	10	+	69013062	69016162	2370	exon_intron
novel_circ_000976	ENSBTAG00000008755	2	-	36602085	36610891	355	annot_exons	2
novel_circ_000977	ENSBTAG00000006919	24	+	50545039	50575960	1793	annot_exons	11
novel_circ_000978	ENSBTAG00000017517	24	-	2393119	2394591	308	annot_exons	2
novel_circ_000979	NA	14	+	38747155	38755115	7961	intergenic
novel_circ_000980	ENSBTAG00000038181	8	-	23671086	23699434	421	annot_exons	4
novel_circ_000981	ENSBTAG00000003788	2	-	124887902	124889573	643	annot_exons	5
novel_circ_000982	ENSBTAG00000004953	16	-	3377304	3380297	1209	annot_exons	3
novel_circ_000983	ENSBTAG00000053922	4	+	19100670	19160558	59771	exon_intron
novel_circ_000984	ENSBTAG00000013899	13	+	46464191	46467750	479	annot_exons	4
novel_circ_000985	ENSBTAG00000030801	10	+	72976684	72989829	6880	exon_intron
novel_circ_000986	ENSBTAG00000017788	16	+	33496286	33552330	650	annot_exons	6
novel_circ_000987	ENSBTAG00000006031	7	+	90339031	90340136	1106	one_exon	1
novel_circ_000988	ENSBTAG00000016980	9	-	86769459	86785268	3661	exon_intron
novel_circ_000989	ENSBTAG00000012929	9	+	32397459	32441549	1028	annot_exons	3
novel_circ_000990	ENSBTAG00000019136	25	+	585817	586522	393	annot_exons	4
novel_circ_000991	ENSBTAG00000016263	X	+	14299469	14309141	425	annot_exons	4
novel_circ_000992	ENSBTAG00000012921	8	-	75661808	75696450	1002	annot_exons	8
novel_circ_000993	ENSBTAG00000012126	11	-	106488969	106495815	1052	annot_exons	8
novel_circ_000994	ENSBTAG00000005443	3	-	78370052	78407573	1039	annot_exons	11
novel_circ_000995	ENSBTAG00000010514	21	-	6012771	6015079	393	annot_exons	2
novel_circ_000996	ENSBTAG00000010542	24	-	42919619	42959576	603	annot_exons	4
novel_circ_000997	ENSBTAG00000004902	14	-	69493498	69498739	447	annot_exons	3
novel_circ_000998	ENSBTAG00000016486	27	-	15851177	15857118	417	annot_exons	4
novel_circ_000999	ENSBTAG00000007562	14	-	34283007	34295110	864	annot_exons	8
novel_circ_001000	ENSBTAG00000052391	10	+	53675731	53679190	350	annot_exons	3
novel_circ_001001	NA	27	+	6222012	6222463	452	intergenic
novel_circ_001002	ENSBTAG00000003111	15	+	17926643	17936195	599	annot_exons	4
novel_circ_001003	ENSBTAG00000007962	13	-	79523860	79532609	368	annot_exons	3
novel_circ_001004	ENSBTAG00000000074	3	-	84577527	84579036	1510	intronic
novel_circ_001005	ENSBTAG00000005124	X	+	85407456	85414910	497	annot_exons	3
novel_circ_001006	ENSBTAG00000052722	3	+	58498112	58501861	680	annot_exons	3
novel_circ_001007	ENSBTAG00000000746	1	+	157325901	157327478	275	annot_exons	2
novel_circ_001008	ENSBTAG00000009637	7	-	25778229	25812952	1675	annot_exons	14
novel_circ_001009	ENSBTAG00000005760	12	-	50387425	50408275	561	annot_exons	5
novel_circ_001010	ENSBTAG00000004672	15	-	20278242	20286206	497	annot_exons	3
novel_circ_001011	ENSBTAG00000007236	27	-	19286418	19303918	1043	annot_exons	6
novel_circ_001012	ENSBTAG00000001895	10	-	4072827	4094248	472	annot_exons	4
novel_circ_001013	ENSBTAG00000025450	10	+	76236254	76236472	219	one_exon	1
novel_circ_001014	ENSBTAG00000043987	8	-	37921930	37928264	662	annot_exons	3
novel_circ_001015	ENSBTAG00000000322	23	+	20686516	20686724	209	one_exon	1
novel_circ_001016	ENSBTAG00000018112	X	-	133486697	133490275	229	annot_exons	2
novel_circ_001017	ENSBTAG00000020726	12	+	85501241	85509234	314	annot_exons	3
novel_circ_001018	ENSBTAG00000044001	1	-	78723505	78724498	994	intronic
novel_circ_001019	ENSBTAG00000030172	19	+	55403313	55406580	538	annot_exons	4
novel_circ_001020	NA	7	-	82913141	82913374	234	intergenic
novel_circ_001021	ENSBTAG00000017711	21	+	23085171	23086230	1060	exon_intron
novel_circ_001022	NA	5	+	57377088	57377581	494	intergenic
novel_circ_001023	ENSBTAG00000011352	5	-	48959376	48961455	253	annot_exons	2
novel_circ_001024	ENSBTAG00000019314	1	-	21210659	21244273	1554	annot_exons	11
novel_circ_001025	ENSBTAG00000031579	2	+	89088395	89091544	3150	one_exon	1
novel_circ_001026	ENSBTAG00000020378	1	-	71587987	71593136	278	annot_exons	2
novel_circ_001027	ENSBTAG00000032366	13	-	47294595	47294840	246	one_exon	1
novel_circ_001028	ENSBTAG00000002676	18	+	54191336	54224756	2725	exon_intron
novel_circ_001029	ENSBTAG00000017122	2	+	130963199	130965186	570	annot_exons	3
novel_circ_001030	ENSBTAG00000032881	14	-	33545264	33573930	5503	exon_intron
novel_circ_001031	ENSBTAG00000011994	19	+	28026805	28046307	956	annot_exons	7
novel_circ_001032	NA	27	-	6220488	6220773	286	intergenic
novel_circ_001033	ENSBTAG00000006531	13	+	46682640	46684411	1772	exon_intron
novel_circ_001034	NA	29	+	46076607	46076900	294	intergenic
novel_circ_001035	ENSBTAG00000010107	8	-	103677512	103685654	345	annot_exons	2
novel_circ_001036	ENSBTAG00000011104	11	-	37770287	37773448	2463	annot_exons	2
novel_circ_001037	ENSBTAG00000010419	15	+	37909047	37909679	633	one_exon	1
novel_circ_001038	ENSBTAG00000012594	1	+	1391008	1391225	218	antisense
novel_circ_001039	ENSBTAG00000012787	16	-	29005230	29005545	316	one_exon	1
novel_circ_001040	ENSBTAG00000040368	10	-	14082049	14082877	378	annot_exons	3
novel_circ_001041	ENSBTAG00000017809	6	-	58965000	58975262	597	annot_exons	5
novel_circ_001042	ENSBTAG00000010312	17	+	72033750	72040926	490	annot_exons	3
novel_circ_001043	ENSBTAG00000001652	21	-	15219274	15232378	13105	exon_intron
novel_circ_001044	NA	10	-	9690736	9693504	2769	intergenic
novel_circ_001045	ENSBTAG00000012148	11	+	106636050	106673819	2199	annot_exons	15
novel_circ_001046	ENSBTAG00000015553	11	-	95937949	95941477	425	annot_exons	4
novel_circ_001047	ENSBTAG00000007930	13	-	64105037	64112876	544	annot_exons	3
novel_circ_001048	ENSBTAG00000005218	15	-	37984917	37988138	392	annot_exons	2
novel_circ_001049	ENSBTAG00000018004	21	-	24535387	24549705	507	annot_exons	4
novel_circ_001050	ENSBTAG00000031575	3	+	35711287	35719614	335	annot_exons	3
novel_circ_001051	NA	25	+	17282355	17289379	7025	intergenic
novel_circ_001052	ENSBTAG00000052391	10	+	53656481	53679190	1143	exon_intron
novel_circ_001053	ENSBTAG00000003552	29	-	1018267	1039763	1334	annot_exons	9
novel_circ_001054	ENSBTAG00000020681	12	+	18741997	18791896	693	annot_exons	5
novel_circ_001055	ENSBTAG00000005827	9	-	40459809	40495802	1392	annot_exons	11
novel_circ_001056	ENSBTAG00000013658	5	+	107830657	107830898	242	intronic
novel_circ_001057	ENSBTAG00000048271	5	-	109203127	109207480	364	annot_exons	3
novel_circ_001058	ENSBTAG00000019689	29	-	44828232	44829931	1700	antisense
novel_circ_001059	ENSBTAG00000011395	5	-	77159643	77180839	1079	exon_intron
novel_circ_001060	ENSBTAG00000021193	9	-	89882552	89883269	718	one_exon	1
novel_circ_001061	ENSBTAG00000001533	9	+	45166379	45192352	521	annot_exons	5
novel_circ_001062	ENSBTAG00000040078	10	+	86792201	86794920	283	annot_exons	2
novel_circ_001063	ENSBTAG00000004912	6	-	88215977	88216197	221	one_exon	1
novel_circ_001064	ENSBTAG00000050110	19	-	20522739	20523819	1081	exon_intron
novel_circ_001065	NA	20	-	71444691	71444777	87	intergenic
novel_circ_001066	ENSBTAG00000004979	23	-	33283430	33283953	271	annot_exons	2
novel_circ_001067	ENSBTAG00000014884	15	+	63908514	63909612	1099	one_exon	1
novel_circ_001068	ENSBTAG00000001057	5	-	113626217	113631287	347	annot_exons	3
novel_circ_001069	ENSBTAG00000003798	18	+	24237548	24239576	295	annot_exons	2
novel_circ_001070	ENSBTAG00000008510	2	+	135830275	135838419	8145	exon_intron
novel_circ_001071	ENSBTAG00000001209	1	-	56492995	56493276	282	antisense
novel_circ_001072	ENSBTAG00000011529	1	+	126512570	126525094	795	annot_exons	6
novel_circ_001073	ENSBTAG00000016091	21	-	16578937	16580734	1798	one_exon	1
novel_circ_001074	ENSBTAG00000008863	10	-	37612319	37615804	272	annot_exons	3
novel_circ_001075	NA	22	-	52413524	52414646	1123	intergenic
novel_circ_001076	ENSBTAG00000005493	6	+	113406639	113441594	857	annot_exons	2
novel_circ_001077	NA	27	-	6220415	6220773	359	intergenic
novel_circ_001078	ENSBTAG00000001108	11	+	68185638	68197829	812	annot_exons	8
novel_circ_001079	ENSBTAG00000018663	19	-	56979985	56981070	1086	one_exon	1
novel_circ_001080	ENSBTAG00000013912	5	+	67947315	67954796	339	annot_exons	3
novel_circ_001081	ENSBTAG00000014370	18	-	15508668	15538177	849	annot_exons	6
novel_circ_001082	ENSBTAG00000012497	1	-	158346982	158351667	4686	exon_intron
novel_circ_001083	ENSBTAG00000018227	22	-	1788970	1802249	957	annot_exons	6
novel_circ_001084	NA	13	+	52527589	52528123	535	intergenic
novel_circ_001085	ENSBTAG00000001391	29	-	12443868	12457996	691	annot_exons	5
novel_circ_001086	NA	27	-	6220566	6220773	208	intergenic
novel_circ_001087	ENSBTAG00000009912	12	-	31859546	31895330	836	annot_exons	7
novel_circ_001088	ENSBTAG00000050156	14	-	64132878	64136427	260	annot_exons	2
novel_circ_001089	ENSBTAG00000012677	13	+	33440670	33441433	764	one_exon	1
novel_circ_001090	ENSBTAG00000009541	22	+	34000024	34029892	836	annot_exons	7
novel_circ_001091	ENSBTAG00000014825	19	+	19719408	19735326	5364	exon_intron
novel_circ_001092	ENSBTAG00000019342	4	+	71032590	71034506	250	annot_exons	2
novel_circ_001093	ENSBTAG00000005946	1	-	87382655	87385305	311	annot_exons	2
novel_circ_001094	ENSBTAG00000018024	27	-	41987779	41988559	781	one_exon	1
novel_circ_001095	ENSBTAG00000012355	3	-	101379184	101379344	161	exon_intron
novel_circ_001096	ENSBTAG00000018436	9	+	60821745	60830280	647	annot_exons	6
novel_circ_001097	ENSBTAG00000010392	16	-	20073152	20100715	533	annot_exons	2
novel_circ_001098	ENSBTAG00000011541	13	-	66016004	66030106	692	annot_exons	4
novel_circ_001099	ENSBTAG00000012729	X	+	96333312	96335417	2106	one_exon	1
novel_circ_001100	ENSBTAG00000046939	11	-	103615323	103615653	331	exon_intron
novel_circ_001101	ENSBTAG00000016512	2	+	30359132	30409707	2749	annot_exons	19
novel_circ_001102	ENSBTAG00000005493	6	+	113406639	113407374	736	one_exon	1
novel_circ_001103	ENSBTAG00000016168	29	+	36296706	36297847	298	annot_exons	2
novel_circ_001104	ENSBTAG00000000390	25	+	28113775	28120642	6868	exon_intron
novel_circ_001105	ENSBTAG00000004907	19	-	26492546	26493163	277	annot_exons	2
novel_circ_001106	ENSBTAG00000001657	29	+	9552575	9605079	1919	annot_exons	20
novel_circ_001107	NA	25	-	30785430	30785959	530	intergenic
novel_circ_001108	ENSBTAG00000021538	10	+	51038692	51059247	20556	exon_intron
novel_circ_001109	NA	25	+	23570428	23571025	598	intergenic
novel_circ_001110	ENSBTAG00000001894	5	+	61127183	61145619	1319	annot_exons	8
novel_circ_001111	ENSBTAG00000007323	5	-	44560554	44580289	2214	annot_exons	11
novel_circ_001112	ENSBTAG00000044150	3	-	3002041	3003076	257	annot_exons	2
novel_circ_001113	ENSBTAG00000004990	10	+	20063680	20079638	861	annot_exons	6
novel_circ_001114	ENSBTAG00000015901	14	-	30008505	30019650	504	annot_exons	3
novel_circ_001115	ENSBTAG00000015413	1	-	127417895	127458111	15159	exon_intron
novel_circ_001116	ENSBTAG00000016486	27	-	15977743	15978341	599	intronic
novel_circ_001117	ENSBTAG00000009655	4	+	74876354	74878534	225	annot_exons	2
novel_circ_001118	ENSBTAG00000032839	1	-	70258272	70274215	634	annot_exons	6
novel_circ_001119	ENSBTAG00000010992	21	-	25201618	25201858	241	one_exon	1
novel_circ_001120	ENSBTAG00000018236	2	+	71866773	71906197	610	annot_exons	6
novel_circ_001121	ENSBTAG00000012068	19	+	11287124	11293153	555	annot_exons	3
novel_circ_001122	NA	1	-	43111722	43111880	159	intergenic
novel_circ_001123	ENSBTAG00000027321	3	-	50248024	50273779	1030	annot_exons	7
novel_circ_001124	ENSBTAG00000034700	6	+	2624027	2670501	767	annot_exons	7
novel_circ_001125	ENSBTAG00000053172	X	+	51102360	51104782	1736	exon_intron
novel_circ_001126	ENSBTAG00000014932	X	+	138657763	138660305	550	annot_exons	2
novel_circ_001127	ENSBTAG00000016298	26	-	17890229	17903311	319	annot_exons	2
novel_circ_001128	ENSBTAG00000002721	3	+	93832858	93848414	1151	annot_exons	3
novel_circ_001129	ENSBTAG00000015683	7	+	44640691	44646449	336	annot_exons	3
novel_circ_001130	NA	6	+	91933065	91933718	654	intergenic
novel_circ_001131	NA	27	+	6222010	6222663	654	intergenic
novel_circ_001132	ENSBTAG00000020806	5	-	47489620	47503626	1165	annot_exons	6
novel_circ_001133	ENSBTAG00000014495	9	+	101837232	101842806	546	annot_exons	5
novel_circ_001134	ENSBTAG00000000946	18	-	10699690	10701578	407	annot_exons	2
novel_circ_001135	ENSBTAG00000012314	7	+	15556398	15558251	246	annot_exons	2
novel_circ_001136	ENSBTAG00000014680	6	-	104809422	104810524	1103	one_exon	1
novel_circ_001137	ENSBTAG00000017026	20	+	18598451	18614084	584	annot_exons	5
novel_circ_001138	ENSBTAG00000014227	12	+	54614967	54627426	394	annot_exons	3
novel_circ_001139	ENSBTAG00000010180	28	+	1586137	1586389	253	one_exon	1
novel_circ_001140	ENSBTAG00000007696	24	+	25264917	25276475	2224	exon_intron
novel_circ_001141	ENSBTAG00000004184	2	+	37066802	37079959	372	annot_exons	3
novel_circ_001142	ENSBTAG00000019353	6	+	46422732	46430741	584	annot_exons	4
novel_circ_001143	ENSBTAG00000023795	18	+	1446146	1454299	290	annot_exons	2
novel_circ_001144	ENSBTAG00000001036	4	+	68483103	68500557	393	annot_exons	3
novel_circ_001145	ENSBTAG00000002267	19	+	36033438	36034772	635	annot_exons	2
novel_circ_001146	ENSBTAG00000014367	X	+	138353678	138373999	553	annot_exons	3
novel_circ_001147	ENSBTAG00000020745	3	+	104614614	104620214	5601	one_exon	1
novel_circ_001148	ENSBTAG00000013411	16	-	44564210	44564852	643	antisense
novel_circ_001149	ENSBTAG00000001209	1	+	56696664	56708695	779	annot_exons	5
novel_circ_001150	ENSBTAG00000006420	2	+	90956795	90958624	342	annot_exons	2
novel_circ_001151	ENSBTAG00000021116	26	+	14263807	14275662	715	annot_exons	6
novel_circ_001152	ENSBTAG00000015808	10	-	45555429	45556302	874	one_exon	1
novel_circ_001153	ENSBTAG00000008432	15	+	51318483	51319775	253	annot_exons	2
novel_circ_001154	ENSBTAG00000006614	22	+	56079225	56080159	935	one_exon	1
novel_circ_001155	ENSBTAG00000021688	16	+	35267325	35282385	1108	annot_exons	7
novel_circ_001156	ENSBTAG00000016951	2	-	112024861	112041650	461	annot_exons	5
novel_circ_001157	ENSBTAG00000000111	11	+	62308704	62309783	236	annot_exons	2
novel_circ_001158	ENSBTAG00000018408	9	+	63881148	63889673	409	annot_exons	5
novel_circ_001159	ENSBTAG00000008966	X	-	104595879	104605200	518	annot_exons	4
novel_circ_001160	ENSBTAG00000018152	18	-	61578393	61578605	213	antisense
novel_circ_001161	ENSBTAG00000007467	24	-	34494023	34496125	302	annot_exons	2
novel_circ_001162	ENSBTAG00000019502	12	-	17895337	17903824	2545	exon_intron
novel_circ_001163	ENSBTAG00000023429	1	-	126343025	126356659	875	annot_exons	7
novel_circ_001164	ENSBTAG00000033457	28	+	25048244	25067417	1169	annot_exons	9
novel_circ_001165	ENSBTAG00000010718	16	+	60166350	60173341	301	annot_exons	3
novel_circ_001166	ENSBTAG00000021756	5	+	6255559	6262293	369	annot_exons	3
novel_circ_001167	ENSBTAG00000002068	3	-	9768614	9768848	235	antisense
novel_circ_001168	ENSBTAG00000033313	20	+	23477689	23518799	1054	annot_exons	9
novel_circ_001169	ENSBTAG00000034436	25	+	2062229	2070822	688	annot_exons	5
novel_circ_001170	ENSBTAG00000043560	MT	-	9523	9685	163	antisense
novel_circ_001171	ENSBTAG00000021288	3	-	19371979	19372431	277	exon_intron
novel_circ_001172	ENSBTAG00000051782	14	+	16463535	16475390	839	annot_exons	7
novel_circ_001173	ENSBTAG00000005493	6	+	113406639	113441626	889	exon_intron
novel_circ_001174	ENSBTAG00000007963	11	+	88523146	88524496	345	annot_exons	2
novel_circ_001175	ENSBTAG00000003166	18	+	50404424	50405994	501	annot_exons	3
novel_circ_001176	ENSBTAG00000004315	3	+	120445084	120446076	993	antisense
novel_circ_001177	ENSBTAG00000006743	24	-	33509741	33538235	2447	exon_intron
novel_circ_001178	ENSBTAG00000032905	11	+	20394732	20413368	524	annot_exons	6
novel_circ_001179	ENSBTAG00000011322	3	-	29438424	29439127	704	one_exon	1
novel_circ_001180	ENSBTAG00000011363	3	+	50750289	50750518	230	one_exon	1
novel_circ_001181	ENSBTAG00000017626	11	-	67730502	67735880	350	annot_exons	3
novel_circ_001182	ENSBTAG00000004427	5	-	5868894	5872263	461	annot_exons	3
novel_circ_001183	ENSBTAG00000016230	X	+	71714803	71716726	250	annot_exons	2
novel_circ_001184	ENSBTAG00000035705	X	+	95836660	95848252	708	annot_exons	5
novel_circ_001185	ENSBTAG00000010627	18	-	1603795	1613351	1163	annot_exons	7
novel_circ_001186	ENSBTAG00000019342	4	+	70996897	71009127	618	annot_exons	4
novel_circ_001187	ENSBTAG00000014230	21	+	61689015	61701954	852	annot_exons	8
novel_circ_001188	ENSBTAG00000020084	27	+	24261580	24265792	611	annot_exons	4
novel_circ_001189	ENSBTAG00000002728	9	+	93745541	93765704	270	annot_exons	2
novel_circ_001190	ENSBTAG00000009643	10	-	76617090	76636051	1648	annot_exons	6
novel_circ_001191	ENSBTAG00000021224	20	-	17902987	17923950	657	annot_exons	3
novel_circ_001192	ENSBTAG00000004190	3	+	49272387	49287672	1076	annot_exons	10
novel_circ_001193	ENSBTAG00000021803	5	+	116868518	116871682	332	annot_exons	2
novel_circ_001194	ENSBTAG00000048114	9	-	87531348	87531504	157	antisense
novel_circ_001195	ENSBTAG00000003709	4	+	29078721	29081215	572	annot_exons	3
novel_circ_001196	ENSBTAG00000017852	3	+	3233228	3236622	603	annot_exons	4
novel_circ_001197	ENSBTAG00000014689	14	+	31256459	31266774	690	exon_intron
novel_circ_001198	ENSBTAG00000014064	26	-	41505953	41529843	639	annot_exons	4
novel_circ_001199	ENSBTAG00000051466	22	-	14195586	14258582	1130	annot_exons	10
novel_circ_001200	ENSBTAG00000016750	8	-	101676382	101700006	922	annot_exons	4
novel_circ_001201	ENSBTAG00000015614	12	+	32381127	32397301	1120	annot_exons	5
novel_circ_001202	ENSBTAG00000043999	11	-	4544280	4582378	2765	annot_exons	11
novel_circ_001203	ENSBTAG00000011172	11	-	11022958	11047674	2869	annot_exons	6
novel_circ_001204	ENSBTAG00000014991	13	+	18706900	18707080	181	one_exon	1
novel_circ_001205	ENSBTAG00000014029	28	-	24511718	24532463	682	annot_exons	5
novel_circ_001206	ENSBTAG00000020174	9	-	73077107	73080227	324	annot_exons	2
novel_circ_001207	ENSBTAG00000008032	4	+	115145696	115146620	236	annot_exons	2
novel_circ_001208	ENSBTAG00000032603	12	-	69627792	69628546	232	annot_exons	2
novel_circ_001209	ENSBTAG00000048271	5	-	109229057	109235547	1022	annot_exons	6
novel_circ_001210	ENSBTAG00000044001	1	-	79107126	79107347	222	intronic
novel_circ_001211	ENSBTAG00000000322	23	+	20633565	20633725	161	one_exon	1
novel_circ_001212	ENSBTAG00000015887	3	+	103927120	103957323	484	annot_exons	3
novel_circ_001213	ENSBTAG00000037383	21	+	16374196	16378335	4140	intronic
novel_circ_001214	ENSBTAG00000006031	7	+	90356299	90361701	606	annot_exons	2
novel_circ_001215	ENSBTAG00000006718	16	-	27468312	27486063	1235	annot_exons	8
novel_circ_001216	ENSBTAG00000003710	12	+	35738510	35755754	717	annot_exons	5
novel_circ_001217	ENSBTAG00000002720	3	+	93944465	93944659	195	antisense
novel_circ_001218	ENSBTAG00000044063	24	+	25481492	25508112	356	annot_exons	3
novel_circ_001219	ENSBTAG00000039709	5	+	65976649	65978260	326	annot_exons	2
novel_circ_001220	ENSBTAG00000012907	3	+	57682340	57684476	302	annot_exons	2
novel_circ_001221	ENSBTAG00000025308	10	-	92637272	92645580	8309	exon_intron
novel_circ_001222	ENSBTAG00000009777	2	-	13426547	13434212	668	exon_intron
novel_circ_001223	ENSBTAG00000013901	14	-	67925623	67960617	521	annot_exons	5
novel_circ_001224	ENSBTAG00000009744	6	-	116070964	116082518	822	annot_exons	5
novel_circ_001225	ENSBTAG00000003748	5	-	43176492	43218828	341	annot_exons	4
novel_circ_001226	ENSBTAG00000019877	3	+	82960709	82984428	1538	annot_exons	12
novel_circ_001227	ENSBTAG00000018979	2	+	122583753	122597376	726	annot_exons	4
novel_circ_001228	ENSBTAG00000004422	3	+	48438560	48442511	3952	exon_intron
novel_circ_001229	NA	22	-	39591050	39596962	5913	intergenic
novel_circ_001230	ENSBTAG00000007876	28	+	42776013	42787997	2635	exon_intron
novel_circ_001231	ENSBTAG00000005987	2	+	4724654	4731325	748	annot_exons	6
novel_circ_001232	ENSBTAG00000000579	20	-	37183604	37184600	390	annot_exons	3
novel_circ_001233	ENSBTAG00000020616	3	+	113138777	113143066	737	annot_exons	6
novel_circ_001234	ENSBTAG00000003381	20	-	66451777	66466592	3238	annot_exons	10
novel_circ_001235	NA	9	-	89215378	89216836	1459	intergenic
novel_circ_001236	ENSBTAG00000000288	13	+	12340949	12352512	340	annot_exons	3
novel_circ_001237	ENSBTAG00000005373	10	+	46993702	46993788	87	antisense
novel_circ_001238	ENSBTAG00000011541	13	-	66035791	66063860	2269	annot_exons	15
novel_circ_001239	ENSBTAG00000020594	17	+	18500984	18502592	324	annot_exons	2
novel_circ_001240	ENSBTAG00000053305	1	-	148953565	148957386	3822	antisense
novel_circ_001241	ENSBTAG00000009637	7	-	25789211	25812952	1568	annot_exons	13
novel_circ_001242	ENSBTAG00000009912	12	-	31862814	31866489	468	annot_exons	4
novel_circ_001243	ENSBTAG00000026673	9	-	33908545	33918596	678	annot_exons	7
novel_circ_001244	ENSBTAG00000006735	22	+	10164366	10172273	7908	exon_intron
novel_circ_001245	ENSBTAG00000054448	14	-	60626602	60654926	1232	annot_exons	11
novel_circ_001246	ENSBTAG00000010136	5	-	88154575	88162587	1021	annot_exons	7
novel_circ_001247	ENSBTAG00000003291	5	-	101130864	101135334	522	annot_exons	3
novel_circ_001248	ENSBTAG00000000241	13	-	77256086	77271195	404	annot_exons	3
novel_circ_001249	ENSBTAG00000002835	17	-	12746445	12787843	1431	annot_exons	5
novel_circ_001250	ENSBTAG00000018437	8	+	46458785	46462270	439	annot_exons	3
novel_circ_001251	ENSBTAG00000013030	11	+	99412649	99414813	2165	one_exon	1
novel_circ_001252	ENSBTAG00000046520	13	+	54529748	54535096	739	annot_exons	4
novel_circ_001253	ENSBTAG00000018596	10	-	100242505	100242882	378	one_exon	1
novel_circ_001254	ENSBTAG00000005760	12	-	50387425	50414706	1239	annot_exons	7
novel_circ_001255	ENSBTAG00000010309	25	-	25633542	25636542	482	annot_exons	3
novel_circ_001256	ENSBTAG00000012443	12	+	2613425	2613617	193	intronic
novel_circ_001257	ENSBTAG00000008510	2	+	135815880	135830409	519	annot_exons	3
novel_circ_001258	ENSBTAG00000007321	20	-	13447801	13473350	1545	annot_exons	10
novel_circ_001259	ENSBTAG00000031385	16	-	57247085	57252271	404	annot_exons	3
novel_circ_001260	ENSBTAG00000013938	1	+	97222403	97231235	505	annot_exons	3
novel_circ_001261	ENSBTAG00000005788	3	-	27652548	27657966	741	annot_exons	2
novel_circ_001262	ENSBTAG00000044150	3	-	3042773	3050815	8043	intronic
novel_circ_001263	ENSBTAG00000000146	12	+	75393190	75394305	263	annot_exons	2
novel_circ_001264	ENSBTAG00000008082	16	+	61316332	61319226	220	annot_exons	2
novel_circ_001265	ENSBTAG00000013949	16	+	30463932	30466008	516	annot_exons	4
novel_circ_001266	ENSBTAG00000005137	16	+	71679706	71710234	604	annot_exons	4
novel_circ_001267	ENSBTAG00000020552	16	-	53874978	53886608	375	annot_exons	3
novel_circ_001268	ENSBTAG00000010818	5	-	90473138	90500107	602	annot_exons	5
novel_circ_001269	ENSBTAG00000019781	2	-	73305868	73306346	479	one_exon	1
novel_circ_001270	ENSBTAG00000018437	8	+	46417536	46429940	195	annot_exons	2
novel_circ_001271	ENSBTAG00000053296	28	-	4093638	4099805	257	annot_exons	2
novel_circ_001272	ENSBTAG00000003884	9	+	103961318	103962535	1218	one_exon	1
novel_circ_001273	ENSBTAG00000018431	29	-	24963569	24966426	499	annot_exons	2
novel_circ_001274	ENSBTAG00000031846	17	+	64378817	64381682	362	annot_exons	3
novel_circ_001275	ENSBTAG00000006492	6	+	44821279	44824851	470	annot_exons	3
novel_circ_001276	ENSBTAG00000012443	12	+	2436832	2452607	293	annot_exons	4
novel_circ_001277	ENSBTAG00000021972	20	+	59408003	59423054	1131	annot_exons	6
novel_circ_001278	ENSBTAG00000000231	28	+	41525749	41537186	833	annot_exons	5
novel_circ_001279	ENSBTAG00000010664	13	+	17071749	17087333	483	annot_exons	4
novel_circ_001280	ENSBTAG00000013225	14	+	73766936	73776601	410	annot_exons	3
novel_circ_001281	ENSBTAG00000001856	18	+	25463855	25464910	425	annot_exons	4
novel_circ_001282	ENSBTAG00000009665	9	+	82139682	82156440	725	annot_exons	5
novel_circ_001283	ENSBTAG00000013577	18	-	53875126	53875570	445	one_exon	1
novel_circ_001284	ENSBTAG00000020018	9	+	34675149	34680470	492	annot_exons	3
novel_circ_001285	ENSBTAG00000018088	24	+	44287872	44299511	11640	exon_intron
novel_circ_001286	ENSBTAG00000006200	5	-	112048883	112052531	442	annot_exons	4
novel_circ_001287	ENSBTAG00000019213	11	+	2758077	2758346	270	one_exon	1
novel_circ_001288	ENSBTAG00000001209	1	+	56607508	56637464	1464	annot_exons	2
novel_circ_001289	ENSBTAG00000015221	1	-	132963714	132984060	436	annot_exons	4
novel_circ_001290	ENSBTAG00000021445	7	-	100037376	100037609	234	one_exon	1
novel_circ_001291	ENSBTAG00000011412	4	-	49033660	49040752	886	annot_exons	6
novel_circ_001292	ENSBTAG00000005788	3	-	27652548	27666010	947	annot_exons	3
novel_circ_001293	ENSBTAG00000055207	26	-	21279010	21279182	173	antisense
novel_circ_001294	ENSBTAG00000038126	19	+	40495258	40500185	352	annot_exons	2
novel_circ_001295	ENSBTAG00000002613	21	-	54941921	54942782	862	one_exon	1
novel_circ_001296	ENSBTAG00000019729	9	+	50387065	50391278	380	annot_exons	3
novel_circ_001297	ENSBTAG00000017976	11	+	101097687	101098710	470	annot_exons	2
novel_circ_001298	ENSBTAG00000019246	15	+	31882308	31886095	580	annot_exons	4
novel_circ_001299	ENSBTAG00000021023	3	-	110342221	110344019	361	annot_exons	2
novel_circ_001300	ENSBTAG00000014752	12	-	12412623	12414870	2248	antisense
novel_circ_001301	ENSBTAG00000017389	17	-	62559542	62559899	252	annot_exons	2
novel_circ_001302	ENSBTAG00000020648	6	-	68737489	68738536	1048	intronic
novel_circ_001303	ENSBTAG00000025403	10	+	86918883	86956595	824	exon_intron
novel_circ_001304	ENSBTAG00000022013	8	-	1085636	1105694	653	annot_exons	4
novel_circ_001305	ENSBTAG00000021919	16	-	80636517	80636821	305	exon_intron
novel_circ_001306	ENSBTAG00000015683	7	+	44617835	44642116	1030	annot_exons	8
novel_circ_001307	ENSBTAG00000004420	10	-	36072663	36073054	392	antisense
novel_circ_001308	ENSBTAG00000009871	13	-	37000600	37000817	218	intronic
novel_circ_001309	ENSBTAG00000012564	19	-	46043069	46044171	309	annot_exons	2
novel_circ_001310	ENSBTAG00000001181	16	-	70380780	70382721	1671	annot_exons	2
novel_circ_001311	ENSBTAG00000018044	25	+	19982119	19983524	277	annot_exons	3
novel_circ_001312	ENSBTAG00000009575	9	+	29848785	29849094	310	exon_intron
novel_circ_001313	ENSBTAG00000002108	11	+	87869643	87870183	541	intronic
novel_circ_001314	ENSBTAG00000015683	7	+	44617835	44646449	1137	annot_exons	9
novel_circ_001315	ENSBTAG00000006197	8	+	29499120	29544043	920	annot_exons	7
novel_circ_001316	ENSBTAG00000020648	6	-	68736855	68738536	1682	intronic
novel_circ_001317	ENSBTAG00000005393	3	-	435037	446638	412	annot_exons	3
novel_circ_001318	ENSBTAG00000000241	13	-	77269640	77271195	305	annot_exons	2
novel_circ_001319	ENSBTAG00000018213	15	+	31658878	31683998	1491	annot_exons	8
novel_circ_001320	ENSBTAG00000020403	12	-	36133357	36194497	4138	annot_exons	24
novel_circ_001321	ENSBTAG00000006378	23	-	50566952	50567356	405	intronic
novel_circ_001322	ENSBTAG00000023169	13	+	10758369	10766830	511	exon_intron
novel_circ_001323	ENSBTAG00000005442	3	+	78420300	78450004	779	annot_exons	5
novel_circ_001324	ENSBTAG00000039943	29	+	17562569	17590977	783	annot_exons	8
novel_circ_001325	NA	1	-	82956758	82957444	687	intergenic
novel_circ_001326	ENSBTAG00000013699	6	+	57342769	57394767	647	annot_exons	4
novel_circ_001327	ENSBTAG00000010437	4	+	95102717	95118792	535	annot_exons	4
novel_circ_001328	ENSBTAG00000005147	29	+	26363149	26367528	667	annot_exons	5
novel_circ_001329	ENSBTAG00000016618	16	-	2951190	2964933	1056	annot_exons	2
novel_circ_001330	ENSBTAG00000011383	1	-	69915655	69934613	585	annot_exons	6
novel_circ_001331	ENSBTAG00000018431	29	-	24963569	24963958	390	one_exon	1
novel_circ_001332	ENSBTAG00000006919	24	+	50545039	50556968	1088	annot_exons	7
novel_circ_001333	ENSBTAG00000002402	9	+	96227586	96240660	910	annot_exons	7
novel_circ_001334	ENSBTAG00000050704	5	+	116392767	116399489	5379	exon_intron
novel_circ_001335	ENSBTAG00000025029	7	+	108890072	108897300	539	annot_exons	3
novel_circ_001336	ENSBTAG00000039117	21	+	54753196	54769825	1053	annot_exons	5
novel_circ_001337	ENSBTAG00000015075	17	+	68015073	68016763	332	annot_exons	3
novel_circ_001338	ENSBTAG00000005362	23	+	3019707	3033966	546	annot_exons	4
novel_circ_001339	ENSBTAG00000002620	28	-	24839357	24847439	648	annot_exons	4
novel_circ_001340	ENSBTAG00000014318	1	+	111840672	111849187	906	annot_exons	5
novel_circ_001341	ENSBTAG00000004168	11	+	30875483	30877450	1968	one_exon	1
novel_circ_001342	ENSBTAG00000008300	2	-	103399906	103404665	1131	annot_exons	6
novel_circ_001343	ENSBTAG00000005427	10	-	101880444	101884118	1428	annot_exons	3
novel_circ_001344	NA	3	+	57973480	57974834	1355	intergenic
novel_circ_001345	ENSBTAG00000006695	14	-	30862190	30886799	13588	exon_intron
novel_circ_001346	ENSBTAG00000017642	6	+	95833502	95834415	914	one_exon	1
novel_circ_001347	ENSBTAG00000021921	11	-	94335287	94342661	555	annot_exons	3
novel_circ_001348	ENSBTAG00000001894	5	+	61131873	61135814	527	annot_exons	3
novel_circ_001349	ENSBTAG00000000204	8	+	103809586	103819839	743	annot_exons	7
novel_circ_001350	ENSBTAG00000012357	14	-	64846582	64934528	1043	annot_exons	6
novel_circ_001351	ENSBTAG00000013781	4	+	15657008	15670718	647	annot_exons	4
novel_circ_001352	ENSBTAG00000027321	3	-	50181346	50192393	669	annot_exons	2
novel_circ_001353	ENSBTAG00000049835	14	-	12564591	12577096	8421	exon_intron
novel_circ_001354	ENSBTAG00000009637	7	-	25804926	25812952	725	annot_exons	6
novel_circ_001355	ENSBTAG00000007986	6	-	116661389	116685495	1909	annot_exons	8
novel_circ_001356	ENSBTAG00000005668	6	+	22490195	22500198	624	annot_exons	4
novel_circ_001357	ENSBTAG00000016167	11	-	20689269	20689755	240	annot_exons	2
novel_circ_001358	ENSBTAG00000012961	6	+	17503709	17509404	351	annot_exons	2
novel_circ_001359	ENSBTAG00000012564	19	-	46134506	46135877	1372	one_exon	1
novel_circ_001360	ENSBTAG00000051164	11	+	78859186	78880981	1442	annot_exons	12
novel_circ_001361	ENSBTAG00000014433	19	-	24824778	24843207	16110	exon_intron
novel_circ_001362	ENSBTAG00000013916	2	-	907803	911345	478	annot_exons	3
novel_circ_001363	ENSBTAG00000044017	5	-	48450800	48472074	314	annot_exons	3
novel_circ_001364	ENSBTAG00000005550	10	-	43066102	43072092	712	annot_exons	5
novel_circ_001365	ENSBTAG00000003111	15	+	17960769	17965021	639	annot_exons	5
novel_circ_001366	ENSBTAG00000007678	13	+	36837647	36838567	490	annot_exons	2
novel_circ_001367	ENSBTAG00000013254	11	-	60167957	60176482	307	annot_exons	3
novel_circ_001368	ENSBTAG00000019187	8	+	96716022	96718306	405	annot_exons	2
novel_circ_001369	ENSBTAG00000003446	25	+	35816595	35817715	614	annot_exons	3
novel_circ_001370	ENSBTAG00000018004	21	-	24535387	24538795	214	annot_exons	2
novel_circ_001371	ENSBTAG00000008424	19	-	21707414	21710119	2706	antisense
novel_circ_001372	ENSBTAG00000013421	29	-	24541752	24548411	188	annot_exons	2
novel_circ_001373	ENSBTAG00000000804	8	+	16830661	16833075	2415	exon_intron
novel_circ_001374	ENSBTAG00000019437	19	+	14820573	14821296	724	one_exon	1
novel_circ_001375	ENSBTAG00000023018	28	-	43901248	43914605	432	annot_exons	3
novel_circ_001376	ENSBTAG00000015527	19	+	17490299	17586779	1118	annot_exons	7
novel_circ_001377	ENSBTAG00000020043	25	+	22630805	22631890	1086	antisense
novel_circ_001378	ENSBTAG00000003218	6	-	108673879	108692821	316	annot_exons	3
novel_circ_001379	ENSBTAG00000020567	11	-	20913918	20935537	1384	annot_exons	11
novel_circ_001380	ENSBTAG00000014764	5	-	104136456	104136617	162	intronic
novel_circ_001381	ENSBTAG00000039132	26	+	17323992	17368270	10386	exon_intron
novel_circ_001382	ENSBTAG00000013187	28	-	33577586	33579905	491	annot_exons	3
novel_circ_001383	ENSBTAG00000017339	14	+	72406434	72423493	516	annot_exons	3
novel_circ_001384	ENSBTAG00000011345	22	+	47968895	47970458	253	annot_exons	2
novel_circ_001385	ENSBTAG00000053587	3	-	68353619	68354028	410	one_exon	1
novel_circ_001386	NA	4	+	19122695	19133962	11268	intergenic
novel_circ_001387	ENSBTAG00000054976	7	+	94024202	94042126	17925	antisense
novel_circ_001388	ENSBTAG00000005501	2	+	31541831	31552378	805	annot_exons	5
novel_circ_001389	ENSBTAG00000013495	6	-	99668981	99682964	1117	annot_exons	5
novel_circ_001390	ENSBTAG00000004005	24	+	56253189	56283875	451	annot_exons	4
novel_circ_001391	ENSBTAG00000002002	14	+	16471895	16489910	2842	exon_intron
novel_circ_001392	ENSBTAG00000019427	6	+	113302569	113339662	21688	exon_intron
novel_circ_001393	ENSBTAG00000017799	17	-	67309715	67312996	276	annot_exons	4
novel_circ_001394	ENSBTAG00000021815	12	+	27990131	27999559	533	annot_exons	3
novel_circ_001395	ENSBTAG00000004400	11	+	101565356	101566687	348	annot_exons	2
novel_circ_001396	ENSBTAG00000007431	21	+	26725964	26746429	1537	exon_intron
novel_circ_001397	ENSBTAG00000012691	27	-	26736158	26737987	291	annot_exons	2
novel_circ_001398	ENSBTAG00000013621	14	-	69540555	69574743	1448	annot_exons	12
novel_circ_001399	ENSBTAG00000005913	15	-	82833224	82857342	2279	annot_exons	17
novel_circ_001400	ENSBTAG00000017517	24	-	2386679	2394591	785	annot_exons	5
novel_circ_001401	ENSBTAG00000005086	13	+	66931781	66940189	416	annot_exons	3
novel_circ_001402	ENSBTAG00000039132	26	+	17323992	17358846	962	exon_intron
novel_circ_001403	ENSBTAG00000003954	3	+	15121689	15199689	6112	exon_intron
novel_circ_001404	ENSBTAG00000001533	9	+	45201408	45217664	643	annot_exons	4
novel_circ_001405	ENSBTAG00000020436	8	-	77168620	77169004	385	one_exon	1
novel_circ_001406	NA	24	-	57257351	57259201	1851	intergenic
novel_circ_001407	ENSBTAG00000016368	11	-	26174420	26179334	280	annot_exons	3
novel_circ_001408	ENSBTAG00000034700	6	+	2624027	2655210	346	annot_exons	3
novel_circ_001409	ENSBTAG00000004953	16	-	3375788	3380297	1380	annot_exons	4
novel_circ_001410	NA	24	-	49311570	49313421	1852	intergenic
novel_circ_001411	ENSBTAG00000045957	5	+	114709754	114720619	515	annot_exons	5
novel_circ_001412	ENSBTAG00000006197	8	+	29505543	29544043	666	annot_exons	5
novel_circ_001413	ENSBTAG00000014689	14	+	31277300	31279395	545	annot_exons	2
novel_circ_001414	ENSBTAG00000001942	3	-	19107589	19117492	606	annot_exons	5
novel_circ_001415	ENSBTAG00000044125	3	-	48307393	48334802	484	annot_exons	5
novel_circ_001416	ENSBTAG00000014605	5	+	97942657	97949355	6699	antisense
novel_circ_001417	ENSBTAG00000019342	4	+	70965492	70972680	760	annot_exons	6
novel_circ_001418	ENSBTAG00000012833	21	-	61231623	61240569	762	annot_exons	5
novel_circ_001419	ENSBTAG00000006246	5	+	25797303	25810821	6209	exon_intron
novel_circ_001420	ENSBTAG00000003354	24	+	36972529	36976886	614	annot_exons	4
novel_circ_001421	ENSBTAG00000017788	16	+	33496286	33594440	1117	annot_exons	9
novel_circ_001422	ENSBTAG00000006194	29	-	44011046	44013573	334	exon_intron
novel_circ_001423	ENSBTAG00000009576	15	+	77076071	77076310	240	antisense
novel_circ_001424	ENSBTAG00000034985	5	-	5574002	5574213	212	one_exon	1
novel_circ_001425	ENSBTAG00000015413	1	-	127427904	127443346	317	annot_exons	3
novel_circ_001426	ENSBTAG00000031433	10	-	54013956	54053191	1228	annot_exons	4
novel_circ_001427	ENSBTAG00000003362	5	+	67602914	67604406	449	annot_exons	2
novel_circ_001428	ENSBTAG00000009600	11	-	10800407	10801476	1070	intronic
novel_circ_001429	ENSBTAG00000013621	14	-	69559904	69582760	1561	annot_exons	7
novel_circ_001430	ENSBTAG00000049698	11	-	29573398	29577555	3064	exon_intron
novel_circ_001431	ENSBTAG00000002755	24	+	41485144	41497299	364	annot_exons	3
novel_circ_001432	ENSBTAG00000010518	20	-	23799967	23802701	391	annot_exons	3
novel_circ_001433	ENSBTAG00000005969	13	-	63472046	63473175	481	annot_exons	2
novel_circ_001434	ENSBTAG00000014289	3	+	94182169	94189189	7021	antisense
novel_circ_001435	ENSBTAG00000017051	3	+	21980423	21981393	536	annot_exons	2
novel_circ_001436	ENSBTAG00000009786	4	+	20634399	20639673	317	annot_exons	2
novel_circ_001437	ENSBTAG00000009037	8	+	63882206	63884282	261	annot_exons	2
novel_circ_001438	ENSBTAG00000017452	2	-	128392267	128393668	346	annot_exons	2
novel_circ_001439	ENSBTAG00000017682	6	-	19933762	19941212	3846	annot_exons	4
novel_circ_001440	ENSBTAG00000015413	1	-	127417895	127443346	394	annot_exons	4
novel_circ_001441	ENSBTAG00000027932	11	+	15017033	15022915	1545	annot_exons	2
novel_circ_001442	ENSBTAG00000007356	12	-	11213884	11214183	300	one_exon	1
novel_circ_001443	ENSBTAG00000014636	18	+	38198109	38206246	3289	annot_exons	2
novel_circ_001444	ENSBTAG00000045832	24	+	61162997	61187749	490	annot_exons	3
novel_circ_001445	ENSBTAG00000021484	15	+	74915673	74925393	9721	intronic
novel_circ_001446	ENSBTAG00000010018	X	-	74415835	74417573	1216	annot_exons	2
novel_circ_001447	ENSBTAG00000011155	11	+	78513752	78528973	1026	annot_exons	7
novel_circ_001448	ENSBTAG00000013941	18	+	36134912	36222126	2706	annot_exons	14
novel_circ_001449	ENSBTAG00000030670	1	+	146091628	146093485	489	annot_exons	3
novel_circ_001450	ENSBTAG00000021691	2	-	35014768	35018396	414	annot_exons	4
novel_circ_001451	ENSBTAG00000034442	1	+	44714813	44715287	475	exon_intron
novel_circ_001452	ENSBTAG00000016524	13	-	63393818	63394168	351	antisense
novel_circ_001453	ENSBTAG00000009912	12	-	31853447	31877097	9010	exon_intron
novel_circ_001454	ENSBTAG00000022808	26	-	38953417	38994721	889	exon_intron
novel_circ_001455	ENSBTAG00000016229	8	-	46583522	46587573	4052	exon_intron
novel_circ_001456	ENSBTAG00000019695	3	-	105932881	105943033	573	annot_exons	4
novel_circ_001457	ENSBTAG00000002485	2	-	105986194	105987537	183	annot_exons	2
novel_circ_001458	ENSBTAG00000015794	3	+	14165862	14166023	162	one_exon	1
novel_circ_001459	ENSBTAG00000016999	1	+	135109176	135129520	556	annot_exons	5
novel_circ_001460	ENSBTAG00000013112	7	-	45648765	45649324	560	one_exon	1
novel_circ_001461	ENSBTAG00000040001	20	-	10319583	10336082	1662	annot_exons	6
novel_circ_001462	ENSBTAG00000011981	14	-	30834389	30853117	1708	annot_exons	11
novel_circ_001463	ENSBTAG00000032148	5	-	36505843	36507852	2010	exon_intron
novel_circ_001464	ENSBTAG00000005564	10	+	14942146	14942590	445	one_exon	1
novel_circ_001465	ENSBTAG00000006719	28	+	44166840	44167140	301	one_exon	1
novel_circ_001466	ENSBTAG00000002520	15	-	77326009	77336527	10519	exon_intron
novel_circ_001467	ENSBTAG00000038181	8	+	23720724	23720952	229	antisense
novel_circ_001468	ENSBTAG00000022847	21	-	41884368	41887498	450	annot_exons	3
novel_circ_001469	ENSBTAG00000017455	27	+	34162164	34173963	236	annot_exons	3
novel_circ_001470	ENSBTAG00000020378	1	-	71571652	71593136	381	annot_exons	3
novel_circ_001471	ENSBTAG00000031919	5	-	45053636	45054587	952	exon_intron
novel_circ_001472	ENSBTAG00000011395	5	-	77155510	77156329	367	annot_exons	3
novel_circ_001473	ENSBTAG00000019644	15	+	74221544	74223996	656	annot_exons	2
novel_circ_001474	ENSBTAG00000027024	21	+	42518712	42547435	4036	annot_exons	2
novel_circ_001475	ENSBTAG00000005937	13	-	61459299	61459862	564	antisense
novel_circ_001476	ENSBTAG00000021538	10	+	51059104	51072486	329	annot_exons	3
novel_circ_001477	ENSBTAG00000017124	3	-	34466942	34467244	303	one_exon	1
novel_circ_001478	ENSBTAG00000031433	10	-	54049153	54056729	559	annot_exons	5
novel_circ_001479	ENSBTAG00000014991	13	+	18841130	18850963	511	annot_exons	3
novel_circ_001480	ENSBTAG00000005293	7	-	49701989	49723243	1045	annot_exons	9
novel_circ_001481	ENSBTAG00000002888	5	+	12428911	12429739	829	one_exon	1
novel_circ_001482	ENSBTAG00000015753	4	-	43476701	43480930	281	annot_exons	2
novel_circ_001483	ENSBTAG00000014648	13	+	66147342	66147535	194	one_exon	1
novel_circ_001484	ENSBTAG00000020787	1	+	151486747	151525503	2199	annot_exons	10
novel_circ_001485	ENSBTAG00000004216	2	+	5199357	5205497	329	annot_exons	4
novel_circ_001486	ENSBTAG00000009665	9	+	81893843	81909231	689	annot_exons	5
novel_circ_001487	ENSBTAG00000005218	15	-	37970158	37971008	279	annot_exons	2
novel_circ_001488	ENSBTAG00000006031	7	+	90337387	90340136	1242	annot_exons	2
novel_circ_001489	ENSBTAG00000014689	14	+	31256583	31266774	566	exon_intron
novel_circ_001490	ENSBTAG00000004570	16	+	38260178	38265564	358	annot_exons	2
novel_circ_001491	NA	27	+	6220659	6220982	324	intergenic
novel_circ_001492	ENSBTAG00000017729	5	-	24740274	24747433	732	annot_exons	5
novel_circ_001493	ENSBTAG00000046684	10	-	100994755	100995508	754	intronic
novel_circ_001494	ENSBTAG00000037972	22	-	35174600	35209497	8832	exon_intron
novel_circ_001495	ENSBTAG00000018774	16	-	3068415	3074067	669	annot_exons	5
novel_circ_001496	ENSBTAG00000024603	17	+	51363108	51363364	257	intronic
novel_circ_001497	ENSBTAG00000003111	15	+	17901375	17909007	822	annot_exons	5
novel_circ_001498	ENSBTAG00000002726	19	-	46229095	46233855	696	annot_exons	5
novel_circ_001499	ENSBTAG00000004238	27	+	33995052	34001152	515	annot_exons	5
novel_circ_001500	ENSBTAG00000016823	10	+	45778336	45781795	425	annot_exons	4
novel_circ_001501	ENSBTAG00000009995	20	+	5662906	5671513	680	annot_exons	5
novel_circ_001502	ENSBTAG00000012412	1	+	3106740	3114147	382	annot_exons	3
novel_circ_001503	ENSBTAG00000009587	28	+	37368714	37370766	2053	intronic
novel_circ_001504	ENSBTAG00000013999	16	+	60411451	60414137	424	annot_exons	3
novel_circ_001505	ENSBTAG00000005436	22	+	28838271	28895075	2811	exon_intron
novel_circ_001506	ENSBTAG00000012961	6	+	17549591	17561609	405	annot_exons	2
novel_circ_001507	ENSBTAG00000001528	4	-	81032118	81053405	12746	exon_intron
novel_circ_001508	ENSBTAG00000001712	22	+	6859821	6863860	273	annot_exons	2
novel_circ_001509	ENSBTAG00000020605	19	-	25100388	25104663	903	annot_exons	6
novel_circ_001510	ENSBTAG00000001499	3	+	28899696	28900674	397	annot_exons	3
novel_circ_001511	ENSBTAG00000015527	19	+	17447531	17452119	582	annot_exons	4
novel_circ_001512	NA	16	-	20379456	20380160	705	intergenic
novel_circ_001513	ENSBTAG00000011541	13	-	66020432	66041826	968	annot_exons	6
novel_circ_001514	ENSBTAG00000014884	15	+	63908514	63938739	1223	annot_exons	2
novel_circ_001515	ENSBTAG00000013949	16	+	30443161	30451854	1067	annot_exons	8
novel_circ_001516	ENSBTAG00000011642	7	+	57456019	57460690	737	annot_exons	4
novel_circ_001517	ENSBTAG00000012357	14	-	65032295	65033390	309	annot_exons	2
novel_circ_001518	ENSBTAG00000012865	23	+	39361553	39364539	428	annot_exons	4
novel_circ_001519	ENSBTAG00000015771	2	-	124733766	124735352	1587	one_exon	1
novel_circ_001520	ENSBTAG00000014605	5	-	97960097	97960642	546	one_exon	1
novel_circ_001521	ENSBTAG00000007884	19	+	34645765	34646199	435	intronic
novel_circ_001522	ENSBTAG00000006029	4	-	76815050	76817315	386	annot_exons	3
novel_circ_001523	ENSBTAG00000008762	17	+	61907702	61935124	1510	annot_exons	8
novel_circ_001524	ENSBTAG00000010419	15	+	37898596	37913982	1226	annot_exons	4
novel_circ_001525	ENSBTAG00000021182	4	+	56592764	56593166	403	intronic
novel_circ_001526	ENSBTAG00000007986	6	-	116658907	116685495	2129	annot_exons	9
novel_circ_001527	ENSBTAG00000019781	2	-	73182255	73187132	320	annot_exons	3
novel_circ_001528	ENSBTAG00000012351	21	+	26306014	26331570	591	annot_exons	4
novel_circ_001529	ENSBTAG00000002313	5	+	83222276	83223877	340	annot_exons	2
novel_circ_001530	ENSBTAG00000015839	22	+	51832683	51868891	1617	annot_exons	6
novel_circ_001531	ENSBTAG00000013955	14	+	3242380	3257051	609	annot_exons	4
novel_circ_001532	ENSBTAG00000013222	9	+	13320818	13326885	556	annot_exons	4
novel_circ_001533	ENSBTAG00000001895	10	-	4072827	4079033	353	annot_exons	3
novel_circ_001534	ENSBTAG00000006919	24	+	50545039	50564734	1441	annot_exons	9
novel_circ_001535	ENSBTAG00000003954	3	-	15296934	15297087	154	antisense
novel_circ_001536	ENSBTAG00000009575	9	+	29962313	30000635	701	annot_exons	6
novel_circ_001537	ENSBTAG00000010949	12	+	23223379	23225775	135	annot_exons	2
novel_circ_001538	ENSBTAG00000039958	18	-	55552251	55552823	331	annot_exons	2
novel_circ_001539	NA	12	-	19479416	19485584	6169	intergenic
novel_circ_001540	NA	27	+	6222012	6222492	481	intergenic
novel_circ_001541	ENSBTAG00000006707	26	+	32940426	32943494	438	annot_exons	5
novel_circ_001542	NA	27	+	6222012	6222527	516	intergenic
novel_circ_001543	ENSBTAG00000008279	13	+	28355557	28356809	1253	antisense
novel_circ_001544	ENSBTAG00000018851	12	-	52267142	52316717	2504	annot_exons	17
novel_circ_001545	ENSBTAG00000052059	14	-	12374450	12427899	23976	exon_intron
novel_circ_001546	ENSBTAG00000018966	26	+	15791201	15804519	514	annot_exons	4
novel_circ_001547	ENSBTAG00000015527	19	-	17639872	17644107	4236	antisense
novel_circ_001548	ENSBTAG00000014879	4	+	44064027	44074500	342	annot_exons	3
novel_circ_001549	ENSBTAG00000047550	8	+	38740558	38741975	1418	one_exon	1
novel_circ_001550	ENSBTAG00000016557	15	+	14338005	14371508	2588	exon_intron
novel_circ_001551	ENSBTAG00000001001	20	+	23019887	23082557	1440	annot_exons	7
novel_circ_001552	ENSBTAG00000015788	8	-	28605150	28628899	1218	annot_exons	5
novel_circ_001553	ENSBTAG00000004990	10	+	20063740	20084040	1107	annot_exons	8
novel_circ_001554	ENSBTAG00000007508	11	-	27973554	27995478	465	annot_exons	4
novel_circ_001555	ENSBTAG00000010426	2	+	104146280	104175203	1182	annot_exons	9
novel_circ_001556	ENSBTAG00000003111	15	+	17901375	17904313	459	annot_exons	3
novel_circ_001557	ENSBTAG00000019354	11	-	46925681	46944062	1185	annot_exons	8
novel_circ_001558	ENSBTAG00000044001	1	-	78555625	78559707	4083	intronic
novel_circ_001559	ENSBTAG00000012341	13	+	60543182	60556441	622	annot_exons	7
novel_circ_001560	ENSBTAG00000018879	23	-	3083829	3087655	1727	annot_exons	2
novel_circ_001561	ENSBTAG00000017140	1	-	53332670	53335400	305	annot_exons	3
novel_circ_001562	ENSBTAG00000039374	12	+	75038540	75042129	538	annot_exons	4
novel_circ_001563	ENSBTAG00000003097	8	-	24999824	25007621	1054	annot_exons	5
novel_circ_001564	ENSBTAG00000010356	24	+	41091566	41099110	395	annot_exons	4
novel_circ_001565	ENSBTAG00000013222	9	+	13278953	13285427	495	annot_exons	4
novel_circ_001566	ENSBTAG00000009665	9	+	81869669	81872229	300	annot_exons	2
novel_circ_001567	NA	27	-	6220391	6220773	383	intergenic
novel_circ_001568	ENSBTAG00000019761	6	+	22073596	22121825	1140	annot_exons	9
novel_circ_001569	ENSBTAG00000018915	28	+	44154883	44155132	250	one_exon	1
novel_circ_001570	NA	27	-	6223619	6224459	841	intergenic
novel_circ_001571	ENSBTAG00000017095	10	-	12604513	12638827	1977	exon_intron
novel_circ_001572	ENSBTAG00000027932	11	+	15100229	15104713	1195	annot_exons	4
novel_circ_001573	NA	23	+	3610849	3617845	6997	intergenic
novel_circ_001574	ENSBTAG00000010271	11	-	96470061	96487778	567	annot_exons	3
novel_circ_001575	ENSBTAG00000010694	28	-	14278630	14282064	3435	antisense
novel_circ_001576	ENSBTAG00000043546	MT	-	13943	14098	156	one_exon	1
novel_circ_001577	ENSBTAG00000003443	6	-	68345010	68349659	525	annot_exons	3
novel_circ_001578	NA	1	-	68104125	68105370	1246	intergenic
novel_circ_001579	ENSBTAG00000017051	3	+	21968576	21981393	1297	annot_exons	9
novel_circ_001580	ENSBTAG00000053441	6	-	32037186	32042889	1868	annot_exons	2
novel_circ_001581	ENSBTAG00000007438	22	+	6091943	6095855	397	annot_exons	2
novel_circ_001582	ENSBTAG00000021606	20	+	18401562	18415531	407	annot_exons	3
novel_circ_001583	ENSBTAG00000009420	X	+	125102872	125117689	639	annot_exons	4
novel_circ_001584	ENSBTAG00000011087	5	-	34327055	34330918	441	annot_exons	4
novel_circ_001585	ENSBTAG00000015910	13	+	19996329	19999911	581	annot_exons	4
novel_circ_001586	ENSBTAG00000018706	19	+	6247593	6253773	370	annot_exons	3
novel_circ_001587	ENSBTAG00000000695	8	-	75363402	75382285	750	annot_exons	7
novel_circ_001588	ENSBTAG00000015794	3	+	14166697	14166867	171	one_exon	1
novel_circ_001589	ENSBTAG00000027134	4	+	13294184	13306782	389	annot_exons	3
novel_circ_001590	ENSBTAG00000034269	12	-	19099147	19099775	629	one_exon	1
novel_circ_001591	ENSBTAG00000020126	20	+	56384132	56396354	438	annot_exons	4
novel_circ_001592	ENSBTAG00000021614	13	-	7134688	7165707	306	annot_exons	3
novel_circ_001593	ENSBTAG00000005454	27	-	29181162	29181456	295	one_exon	1
novel_circ_001594	ENSBTAG00000052059	14	-	12458977	12543218	8476	exon_intron
novel_circ_001595	ENSBTAG00000031725	19	-	27229889	27291700	61812	antisense
novel_circ_001596	ENSBTAG00000011435	19	-	38837839	38849233	1000	annot_exons	8
novel_circ_001597	ENSBTAG00000001126	6	+	93602344	93617495	478	annot_exons	4
novel_circ_001598	ENSBTAG00000009868	25	+	35576036	35576491	456	one_exon	1
novel_circ_001599	ENSBTAG00000009852	5	+	7513331	7528013	613	annot_exons	3
novel_circ_001600	ENSBTAG00000018729	16	-	51695940	51699841	798	annot_exons	2
novel_circ_001601	ENSBTAG00000000245	9	-	76242863	76271061	281	annot_exons	2
novel_circ_001602	ENSBTAG00000009912	12	-	31863639	31866489	410	annot_exons	3
novel_circ_001603	ENSBTAG00000004987	3	+	16388438	16400813	1035	annot_exons	6
novel_circ_001604	ENSBTAG00000038434	X	-	74680640	74681343	704	antisense
novel_circ_001605	ENSBTAG00000021116	26	+	14292891	14301158	314	annot_exons	3
novel_circ_001606	ENSBTAG00000018548	16	+	71486252	71508503	10379	exon_intron
novel_circ_001607	ENSBTAG00000046760	5	-	119219826	119227387	992	annot_exons	5
novel_circ_001608	ENSBTAG00000008098	17	-	7730209	7730540	332	one_exon	1
novel_circ_001609	ENSBTAG00000015593	19	+	25244080	25252827	895	annot_exons	3
novel_circ_001610	ENSBTAG00000016228	1	-	106151455	106155785	475	annot_exons	5
novel_circ_001611	ENSBTAG00000043981	15	+	42659205	42672334	776	annot_exons	7
novel_circ_001612	ENSBTAG00000015630	X	+	76513190	76516255	999	annot_exons	3
novel_circ_001613	ENSBTAG00000027932	11	+	14988282	15007531	1093	annot_exons	7
novel_circ_001614	ENSBTAG00000003111	15	+	17933356	17936195	244	annot_exons	2
novel_circ_001615	ENSBTAG00000016737	12	-	33098681	33129672	518	annot_exons	5
novel_circ_001616	ENSBTAG00000014269	17	+	50986166	50994447	583	annot_exons	4
novel_circ_001617	NA	18	+	54112085	54112358	274	intergenic
novel_circ_001618	ENSBTAG00000020567	11	-	20927523	20935537	613	annot_exons	5
novel_circ_001619	ENSBTAG00000027321	3	-	50199084	50277953	3378	annot_exons	23
novel_circ_001620	ENSBTAG00000013042	10	-	69626643	69645134	812	annot_exons	6
novel_circ_001621	ENSBTAG00000014406	12	+	35661945	35662475	531	exon_intron
novel_circ_001622	ENSBTAG00000008341	10	-	9968575	9981382	586	annot_exons	3
novel_circ_001623	ENSBTAG00000000371	10	+	13224850	13225097	248	one_exon	1
novel_circ_001624	ENSBTAG00000024595	9	+	76863719	76864768	1050	one_exon	1
novel_circ_001625	ENSBTAG00000006214	8	-	70430371	70430614	244	one_exon	1
novel_circ_001626	ENSBTAG00000013750	28	-	8218858	8240316	539	annot_exons	4
novel_circ_001627	ENSBTAG00000003166	18	+	50421629	50429737	724	annot_exons	7
novel_circ_001628	ENSBTAG00000000859	5	+	33940564	33951628	410	annot_exons	3
novel_circ_001629	ENSBTAG00000011155	11	+	78513752	78572604	2097	annot_exons	13
novel_circ_001630	ENSBTAG00000000985	11	-	73386813	73397298	10486	intronic
novel_circ_001631	ENSBTAG00000000529	23	-	12416027	12436221	1181	annot_exons	5
novel_circ_001632	ENSBTAG00000000662	5	-	113146151	113151865	5715	one_exon	1
novel_circ_001633	ENSBTAG00000012121	11	-	106408464	106409958	1495	antisense
novel_circ_001634	ENSBTAG00000014038	6	-	90421015	90430843	849	annot_exons	6
novel_circ_001635	ENSBTAG00000007876	28	+	42778075	42787997	573	annot_exons	4
novel_circ_001636	ENSBTAG00000004902	14	-	69471776	69503235	2284	annot_exons	19
novel_circ_001637	ENSBTAG00000037457	24	-	53613222	53614387	1166	exon_intron
novel_circ_001638	ENSBTAG00000002458	20	+	37004042	37006118	229	annot_exons	2
novel_circ_001639	ENSBTAG00000049368	21	-	28441675	28446268	698	exon_intron
novel_circ_001640	ENSBTAG00000017108	2	-	132802860	132823456	1088	exon_intron
novel_circ_001641	ENSBTAG00000009020	11	+	18854667	18908268	538	annot_exons	3
novel_circ_001642	ENSBTAG00000000918	9	+	103551504	103560222	954	annot_exons	8
novel_circ_001643	ENSBTAG00000010309	25	-	25634641	25645186	545	annot_exons	4
novel_circ_001644	ENSBTAG00000012357	14	-	64616772	64637612	992	annot_exons	4
novel_circ_001645	ENSBTAG00000010649	21	-	6869582	6907420	889	annot_exons	7
novel_circ_001646	ENSBTAG00000000146	12	+	75219888	75220083	196	one_exon	1
novel_circ_001647	ENSBTAG00000001652	21	-	15022073	15022803	731	intronic
novel_circ_001648	ENSBTAG00000014623	13	+	48123898	48124465	289	exon_intron
novel_circ_001649	ENSBTAG00000044173	11	+	61351368	61355235	364	annot_exons	2
novel_circ_001650	ENSBTAG00000002750	4	-	9554284	9561224	887	annot_exons	6
novel_circ_001651	ENSBTAG00000008613	15	+	63706846	63715668	732	annot_exons	4
novel_circ_001652	ENSBTAG00000009420	X	+	125157215	125163077	732	annot_exons	4
novel_circ_001653	ENSBTAG00000011892	5	-	49651811	49654092	324	annot_exons	2
novel_circ_001654	ENSBTAG00000014299	3	-	30624070	30624240	171	antisense
novel_circ_001655	ENSBTAG00000026915	8	-	1403980	1418168	956	annot_exons	6
novel_circ_001656	ENSBTAG00000001391	29	-	12435217	12468133	1137	annot_exons	8
novel_circ_001657	ENSBTAG00000011007	19	-	57163635	57164827	693	exon_intron
novel_circ_001658	ENSBTAG00000011412	4	-	49021337	49022899	295	annot_exons	2
novel_circ_001659	ENSBTAG00000005453	5	-	77277101	77280390	452	annot_exons	4
novel_circ_001660	ENSBTAG00000025898	11	-	5997002	5998143	307	annot_exons	2
novel_circ_001661	ENSBTAG00000003185	14	+	10292315	10296359	4045	exon_intron
novel_circ_001662	ENSBTAG00000012768	7	-	61373698	61373930	233	antisense
novel_circ_001663	ENSBTAG00000021217	3	+	40518592	40522240	363	annot_exons	2
novel_circ_001664	ENSBTAG00000000664	3	-	27288650	27294308	357	annot_exons	2
novel_circ_001665	ENSBTAG00000000266	2	-	5670300	5671137	838	one_exon	1
novel_circ_001666	ENSBTAG00000054533	3	+	77495967	77546448	50482	exon_intron
novel_circ_001667	ENSBTAG00000008696	8	+	84792514	84813276	556	annot_exons	4
novel_circ_001668	ENSBTAG00000010505	29	+	18115427	18127343	464	annot_exons	4
novel_circ_001669	ENSBTAG00000052059	14	-	12534875	12535336	462	exon_intron
novel_circ_001670	ENSBTAG00000011516	14	+	60104177	60124359	2444	annot_exons	5
novel_circ_001671	ENSBTAG00000012058	23	+	51263943	51265552	198	annot_exons	2
novel_circ_001672	ENSBTAG00000019354	11	-	46934096	46944062	876	annot_exons	6
novel_circ_001673	ENSBTAG00000016557	15	+	14403874	14417207	731	annot_exons	6
novel_circ_001674	ENSBTAG00000004471	1	+	43048114	43076653	1458	annot_exons	7
novel_circ_001675	ENSBTAG00000002020	20	+	4810988	4814818	459	annot_exons	3
novel_circ_001676	ENSBTAG00000002002	14	+	16495893	16503434	509	annot_exons	3
novel_circ_001677	ENSBTAG00000005523	25	+	15860702	15865505	440	annot_exons	2
novel_circ_001678	ENSBTAG00000039662	16	-	51898057	51910020	751	annot_exons	5
novel_circ_001679	ENSBTAG00000003410	21	-	23960554	23961539	986	one_exon	1
novel_circ_001680	ENSBTAG00000002835	17	-	12787310	12787843	534	one_exon	1
novel_circ_001681	ENSBTAG00000030962	22	-	59449223	59457625	470	annot_exons	3
novel_circ_001682	ENSBTAG00000010309	25	-	25663459	25671975	691	annot_exons	3
novel_circ_001683	ENSBTAG00000008299	1	-	132176829	132189769	737	annot_exons	6
novel_circ_001684	ENSBTAG00000023845	26	-	42740049	42756468	1195	exon_intron
novel_circ_001685	ENSBTAG00000004005	24	+	56069318	56077241	411	annot_exons	2
novel_circ_001686	ENSBTAG00000013912	5	+	67922136	67954796	1467	annot_exons	12
novel_circ_001687	ENSBTAG00000012293	19	+	35685200	35720398	21320	exon_intron
novel_circ_001688	ENSBTAG00000033680	19	-	62541086	62591150	1241	annot_exons	10
novel_circ_001689	ENSBTAG00000018460	20	-	67924989	67937588	826	annot_exons	5
novel_circ_001690	ENSBTAG00000048628	16	-	72754651	72754852	202	one_exon	1
novel_circ_001691	ENSBTAG00000007494	8	-	42399286	42487035	2357	annot_exons	17
novel_circ_001692	ENSBTAG00000019819	10	+	77662690	77663117	428	one_exon	1
novel_circ_001693	ENSBTAG00000010432	16	-	4371424	4378230	392	annot_exons	3
novel_circ_001694	ENSBTAG00000001391	29	-	12435217	12457996	973	annot_exons	7
novel_circ_001695	ENSBTAG00000012213	28	-	41211232	41214355	1160	annot_exons	2
novel_circ_001696	ENSBTAG00000037400	25	+	38909072	38911383	1866	annot_exons	2
novel_circ_001697	ENSBTAG00000008369	3	-	21441719	21442065	347	antisense
novel_circ_001698	ENSBTAG00000016549	23	-	32341240	32352727	435	annot_exons	4
novel_circ_001699	ENSBTAG00000009020	11	+	18824086	18854840	30755	exon_intron
novel_circ_001700	ENSBTAG00000012267	5	-	1247252	1249231	483	annot_exons	4
novel_circ_001701	ENSBTAG00000004413	7	+	95041858	95059402	820	annot_exons	4
novel_circ_001702	ENSBTAG00000009990	7	-	6579183	6579945	763	antisense
novel_circ_001703	ENSBTAG00000015188	13	+	44604920	44605654	735	one_exon	1
novel_circ_001704	ENSBTAG00000001391	29	-	12453176	12468136	531	annot_exons	4
novel_circ_001705	ENSBTAG00000003178	26	-	41743413	41823113	1280	annot_exons	10
novel_circ_001706	ENSBTAG00000009985	21	+	33426704	33436445	1341	annot_exons	5
novel_circ_001707	ENSBTAG00000005498	14	-	15151561	15162788	913	annot_exons	6
novel_circ_001708	ENSBTAG00000005083	9	+	94818253	94832909	14657	exon_intron
novel_circ_001709	ENSBTAG00000001173	16	+	75142460	75150078	1451	annot_exons	2
novel_circ_001710	ENSBTAG00000012103	19	+	30678571	30715284	698	annot_exons	6
novel_circ_001711	ENSBTAG00000021304	21	-	55215470	55223783	985	annot_exons	7
novel_circ_001712	ENSBTAG00000052736	8	+	40361503	40369287	1255	annot_exons	2
novel_circ_001713	ENSBTAG00000000687	5	-	19347569	19399351	1374	annot_exons	9
novel_circ_001714	ENSBTAG00000018971	10	-	80190480	80193635	3156	antisense
novel_circ_001715	ENSBTAG00000020160	24	-	25076133	25094160	3893	exon_intron
novel_circ_001716	ENSBTAG00000005443	3	-	78373682	78388499	500	annot_exons	4
novel_circ_001717	ENSBTAG00000011396	10	+	25905505	25908959	402	annot_exons	3
novel_circ_001718	ENSBTAG00000034522	17	+	12046079	12047263	218	annot_exons	2
novel_circ_001719	ENSBTAG00000011104	11	-	37735091	37738670	347	annot_exons	2
novel_circ_001720	ENSBTAG00000004135	25	-	37829276	37852075	1004	annot_exons	7
novel_circ_001721	ENSBTAG00000006071	29	+	47526233	47537394	1095	annot_exons	10
novel_circ_001722	ENSBTAG00000004484	5	-	24125256	24150601	650	annot_exons	4
novel_circ_001723	ENSBTAG00000021190	24	+	28837020	28848754	621	annot_exons	4
novel_circ_001724	ENSBTAG00000003616	3	-	29477291	29478115	349	annot_exons	2
novel_circ_001725	ENSBTAG00000021977	7	-	26432073	26453197	635	annot_exons	5
novel_circ_001726	ENSBTAG00000004190	3	+	49281102	49287672	941	annot_exons	9
novel_circ_001727	ENSBTAG00000018460	20	-	67989623	67989948	326	one_exon	1
novel_circ_001728	ENSBTAG00000046358	14	+	63635784	63638727	570	annot_exons	3
novel_circ_001729	ENSBTAG00000018313	12	+	74456491	74456672	182	intronic
novel_circ_001730	ENSBTAG00000020681	12	+	18741997	18749134	299	annot_exons	2
novel_circ_001731	ENSBTAG00000003726	8	-	8003809	8004607	799	exon_intron
novel_circ_001732	ENSBTAG00000019508	13	-	12224978	12233034	455	annot_exons	5
novel_circ_001733	ENSBTAG00000006945	1	-	75929761	75942519	453	annot_exons	5
novel_circ_001734	NA	27	-	6220391	6220706	316	intergenic
novel_circ_001735	ENSBTAG00000014467	8	+	40577059	40619174	415	annot_exons	3
novel_circ_001736	ENSBTAG00000014029	28	-	24498857	24532463	843	annot_exons	6
novel_circ_001737	ENSBTAG00000002447	7	-	6513806	6517463	3658	exon_intron
novel_circ_001738	NA	23	+	3610595	3617845	7251	intergenic
novel_circ_001739	ENSBTAG00000002883	19	-	51873514	51873672	159	one_exon	1
novel_circ_001740	ENSBTAG00000010998	2	+	89754514	89755030	517	one_exon	1
novel_circ_001741	ENSBTAG00000002600	3	-	82015106	82035418	1161	annot_exons	8
novel_circ_001742	ENSBTAG00000018114	2	-	48309834	48310289	265	annot_exons	2
novel_circ_001743	ENSBTAG00000012068	19	+	11234509	11236557	286	annot_exons	2
novel_circ_001744	ENSBTAG00000019409	5	-	65603432	65612015	406	annot_exons	3
novel_circ_001745	ENSBTAG00000007357	21	+	5300954	5301449	496	one_exon	1
novel_circ_001746	ENSBTAG00000003111	15	+	17914925	17920796	741	annot_exons	5
novel_circ_001747	ENSBTAG00000008717	2	-	112107444	112114981	426	annot_exons	2
novel_circ_001748	ENSBTAG00000009239	9	-	39179511	39209354	752	annot_exons	3
novel_circ_001749	ENSBTAG00000009101	17	+	55151066	55151878	813	one_exon	1
novel_circ_001750	ENSBTAG00000032881	14	-	33561338	33568943	351	annot_exons	2
novel_circ_001751	ENSBTAG00000013955	14	+	3323180	3323531	352	exon_intron
novel_circ_001752	ENSBTAG00000047856	1	+	71301931	71302138	208	one_exon	1
novel_circ_001753	ENSBTAG00000000767	10	-	1024545	1031793	379	annot_exons	3
novel_circ_001754	ENSBTAG00000006328	22	-	50312608	50317274	1439	annot_exons	3
novel_circ_001755	ENSBTAG00000013023	11	+	6611071	6614970	602	annot_exons	4
novel_circ_001756	ENSBTAG00000003525	11	+	98347459	98371951	1615	annot_exons	16
novel_circ_001757	ENSBTAG00000043999	11	-	4562517	4582378	1967	annot_exons	6
novel_circ_001758	ENSBTAG00000013982	10	-	17565410	17573560	360	annot_exons	5
novel_circ_001759	ENSBTAG00000019729	9	+	50387065	50396264	623	annot_exons	4
novel_circ_001760	ENSBTAG00000012070	19	+	11172636	11226004	5910	exon_intron
novel_circ_001761	ENSBTAG00000025308	10	-	92645386	92673119	694	annot_exons	3
novel_circ_001762	ENSBTAG00000018660	5	+	119720278	119720520	243	one_exon	1
novel_circ_001763	ENSBTAG00000016578	2	+	129504997	129507559	341	annot_exons	3
novel_circ_001764	ENSBTAG00000036183	17	-	58104806	58123816	359	annot_exons	3
novel_circ_001765	ENSBTAG00000010204	9	+	86934086	86952155	850	annot_exons	7
novel_circ_001766	ENSBTAG00000045828	7	+	43376791	43377982	1192	one_exon	1
novel_circ_001767	ENSBTAG00000020536	6	-	36340829	36356325	478	annot_exons	5
novel_circ_001768	ENSBTAG00000012096	9	+	19858124	19901146	608	annot_exons	5
novel_circ_001769	ENSBTAG00000031598	25	+	27671416	27687750	888	annot_exons	9
novel_circ_001770	ENSBTAG00000017299	21	+	68254481	68268347	11605	exon_intron
novel_circ_001771	ENSBTAG00000044063	24	+	25481492	25492170	231	annot_exons	2
novel_circ_001772	ENSBTAG00000024851	8	-	63230789	63231022	234	one_exon	1
novel_circ_001773	ENSBTAG00000022069	17	-	55191914	55221840	1847	annot_exons	12
novel_circ_001774	ENSBTAG00000031561	1	-	109400361	109400974	322	annot_exons	2
novel_circ_001775	ENSBTAG00000010243	4	+	117404934	117413196	557	annot_exons	3
novel_circ_001776	ENSBTAG00000001888	17	+	58642913	58643150	238	one_exon	1
novel_circ_001777	ENSBTAG00000012705	16	+	27369655	27370397	743	one_exon	1
novel_circ_001778	ENSBTAG00000011880	1	+	148659389	148661455	355	annot_exons	3
novel_circ_001779	ENSBTAG00000021669	13	+	65861792	65875034	13243	antisense
novel_circ_001780	ENSBTAG00000019855	X	+	123735341	123739799	350	annot_exons	3
novel_circ_001781	ENSBTAG00000018488	6	+	101870136	101871252	1117	intronic
novel_circ_001782	ENSBTAG00000020752	8	+	54155139	54157161	279	annot_exons	2
novel_circ_001783	ENSBTAG00000012251	28	+	9489859	9494336	438	annot_exons	3
novel_circ_001784	ENSBTAG00000003239	5	+	65218859	65222243	293	annot_exons	2
novel_circ_001785	ENSBTAG00000020567	11	-	20918416	20935537	903	annot_exons	7
novel_circ_001786	NA	27	+	6221594	6221854	261	intergenic
novel_circ_001787	ENSBTAG00000010760	9	-	39088023	39093886	5864	antisense
novel_circ_001788	ENSBTAG00000012599	10	+	13899319	13899577	259	intronic
novel_circ_001789	ENSBTAG00000021090	25	+	14377821	14385818	1448	exon_intron
novel_circ_001790	ENSBTAG00000010534	19	-	34960672	34961459	266	annot_exons	2
novel_circ_001791	ENSBTAG00000006201	10	-	60702315	60707767	713	annot_exons	3
novel_circ_001792	ENSBTAG00000003328	22	-	55841333	55844292	276	annot_exons	2
novel_circ_001793	ENSBTAG00000002966	1	-	137131807	137152685	1671	annot_exons	14
novel_circ_001794	ENSBTAG00000020436	8	-	77134041	77143882	637	annot_exons	4
novel_circ_001795	ENSBTAG00000006770	14	+	81805403	81831505	674	annot_exons	5
novel_circ_001796	ENSBTAG00000018945	15	-	15621018	15626648	1111	annot_exons	3
novel_circ_001797	NA	27	-	6220566	6220786	221	intergenic
novel_circ_001798	ENSBTAG00000006186	16	+	18877707	18881685	253	annot_exons	2
novel_circ_001799	ENSBTAG00000005197	25	+	33707697	33712145	656	annot_exons	5
novel_circ_001800	ENSBTAG00000037457	24	-	53613222	53617468	4247	exon_intron
novel_circ_001801	ENSBTAG00000011541	13	-	66015994	66030106	702	annot_exons	4
novel_circ_001802	ENSBTAG00000018894	7	-	16353200	16356015	368	annot_exons	2
novel_circ_001803	ENSBTAG00000020801	14	+	10727467	10728382	916	exon_intron
novel_circ_001804	ENSBTAG00000005263	17	+	416725	418223	1499	intronic
novel_circ_001805	ENSBTAG00000005729	9	+	50839654	50863408	7841	exon_intron
novel_circ_001806	ENSBTAG00000009020	11	+	18906829	18908268	364	annot_exons	2
novel_circ_001807	ENSBTAG00000003954	3	+	15105468	15122209	16742	exon_intron
novel_circ_001808	ENSBTAG00000017118	23	-	39835891	39836629	264	annot_exons	2
novel_circ_001809	ENSBTAG00000020283	26	+	31068824	31072204	369	annot_exons	2
novel_circ_001810	ENSBTAG00000045832	24	+	61162997	61170346	323	annot_exons	2
novel_circ_001811	ENSBTAG00000033680	19	-	62550168	62591150	773	annot_exons	7
novel_circ_001812	ENSBTAG00000001552	13	+	33211181	33212874	576	annot_exons	4
novel_circ_001813	ENSBTAG00000000579	20	-	37217155	37221059	705	annot_exons	5
novel_circ_001814	ENSBTAG00000011981	14	-	30834389	30843144	1041	annot_exons	6
novel_circ_001815	ENSBTAG00000009420	X	+	125102872	125107425	395	annot_exons	3
novel_circ_001816	ENSBTAG00000008025	4	+	118492097	118497774	338	annot_exons	3
novel_circ_001817	ENSBTAG00000027722	15	-	43203464	43216753	1169	annot_exons	10
novel_circ_001818	ENSBTAG00000019930	29	+	18360971	18369030	648	annot_exons	5
novel_circ_001819	ENSBTAG00000048628	16	-	72866176	72867170	995	intronic
novel_circ_001820	ENSBTAG00000009279	26	+	13372824	13375513	376	annot_exons	3
novel_circ_001821	ENSBTAG00000015962	2	+	46556860	46560160	455	annot_exons	3
novel_circ_001822	ENSBTAG00000012068	19	+	11305893	11315623	621	annot_exons	4
novel_circ_001823	ENSBTAG00000007233	21	+	65359352	65373057	279	annot_exons	2
novel_circ_001824	ENSBTAG00000026371	25	+	10730415	10752084	306	annot_exons	2
novel_circ_001825	ENSBTAG00000007863	2	+	79441933	79473295	1110	annot_exons	12
novel_circ_001826	ENSBTAG00000016080	16	-	41263708	41267006	329	annot_exons	2
novel_circ_001827	ENSBTAG00000024426	4	+	12194053	12194206	154	one_exon	1
novel_circ_001828	ENSBTAG00000004448	15	-	76689943	76692106	468	annot_exons	3
novel_circ_001829	ENSBTAG00000008167	1	+	149330702	149379790	1895	annot_exons	20
novel_circ_001830	ENSBTAG00000005564	10	+	14917377	14942590	590	exon_intron
novel_circ_001831	ENSBTAG00000017164	5	-	29449725	29461707	512	annot_exons	4
novel_circ_001832	ENSBTAG00000040584	24	+	26036180	26051082	1579	annot_exons	10
novel_circ_001833	ENSBTAG00000004499	8	+	102747281	102770084	560	annot_exons	5
novel_circ_001834	ENSBTAG00000030581	1	-	154148265	154170388	481	annot_exons	3
novel_circ_001835	ENSBTAG00000030942	1	+	138406263	138428801	426	annot_exons	5
novel_circ_001836	ENSBTAG00000004965	28	-	1445713	1448974	454	annot_exons	3
novel_circ_001837	ENSBTAG00000033680	19	-	62505036	62563366	36813	exon_intron
novel_circ_001838	ENSBTAG00000019639	14	+	80775511	80783767	236	annot_exons	2
novel_circ_001839	ENSBTAG00000017124	3	-	34449994	34457979	1136	annot_exons	8
novel_circ_001840	ENSBTAG00000008839	X	+	96141167	96141414	248	one_exon	1
novel_circ_001841	ENSBTAG00000001505	6	-	115751167	115787522	3756	exon_intron
novel_circ_001842	ENSBTAG00000012433	16	-	76573237	76584495	249	annot_exons	3
novel_circ_001843	ENSBTAG00000001391	29	-	12439344	12468133	961	annot_exons	7
novel_circ_001844	ENSBTAG00000053296	28	-	4089658	4099805	657	annot_exons	4
novel_circ_001845	ENSBTAG00000012443	12	+	2391561	2395458	502	annot_exons	3
novel_circ_001846	ENSBTAG00000051298	18	+	52424062	52428254	2224	exon_intron
novel_circ_001847	NA	7	-	984733	984888	156	intergenic
novel_circ_001848	ENSBTAG00000011529	1	+	126514355	126519350	495	annot_exons	4
novel_circ_001849	ENSBTAG00000012068	19	+	11234509	11293153	1380	annot_exons	8
novel_circ_001850	ENSBTAG00000019954	21	+	20602997	20608257	304	annot_exons	2
novel_circ_001851	ENSBTAG00000025277	7	-	44193902	44195618	732	annot_exons	2
novel_circ_001852	ENSBTAG00000019065	4	-	60953043	60963901	580	annot_exons	4
novel_circ_001853	ENSBTAG00000017788	16	+	33496286	33532138	383	annot_exons	3
novel_circ_001854	ENSBTAG00000033032	X	+	37504053	37504235	183	one_exon	1
novel_circ_001855	ENSBTAG00000010672	12	+	76953695	76967469	428	annot_exons	4
novel_circ_001856	ENSBTAG00000030706	3	-	82156322	82166078	424	annot_exons	4
novel_circ_001857	ENSBTAG00000031688	29	+	44669694	44671376	620	exon_intron
novel_circ_001858	ENSBTAG00000017255	11	+	75107375	75155186	2051	annot_exons	16
novel_circ_001859	ENSBTAG00000021214	6	-	110781715	110787609	1084	annot_exons	4
novel_circ_001860	ENSBTAG00000013825	5	+	85142457	85149226	307	annot_exons	2
novel_circ_001861	ENSBTAG00000013602	1	-	139310784	139322948	926	annot_exons	6
novel_circ_001862	ENSBTAG00000025477	7	+	21623853	21645302	336	annot_exons	3
novel_circ_001863	ENSBTAG00000048916	24	+	49212687	49217302	1052	exon_intron
novel_circ_001864	ENSBTAG00000012970	26	-	44283690	44307574	1089	annot_exons	3
novel_circ_001865	ENSBTAG00000009516	8	+	91278139	91284669	654	annot_exons	4
novel_circ_001866	ENSBTAG00000014166	11	+	46256876	46259327	494	annot_exons	3
novel_circ_001867	ENSBTAG00000018616	20	-	16957598	16972471	522	annot_exons	4
novel_circ_001868	ENSBTAG00000012564	19	-	46065074	46135877	1514	annot_exons	2
novel_circ_001869	ENSBTAG00000016703	16	-	12094241	12101988	460	annot_exons	4
novel_circ_001870	ENSBTAG00000044087	24	-	19995429	20001642	6214	exon_intron
novel_circ_001871	ENSBTAG00000013175	18	+	44723274	44724562	1289	one_exon	1
novel_circ_001872	ENSBTAG00000010693	12	+	50853139	50858140	694	annot_exons	3
novel_circ_001873	ENSBTAG00000004564	1	+	115462093	115462258	166	antisense
novel_circ_001874	ENSBTAG00000021964	14	+	70162976	70163441	359	annot_exons	2
novel_circ_001875	ENSBTAG00000006420	2	+	90887020	90888725	1706	intronic
novel_circ_001876	ENSBTAG00000018437	8	+	46462130	46507848	1160	annot_exons	8
novel_circ_001877	ENSBTAG00000016456	21	-	67667432	67677992	421	annot_exons	4
novel_circ_001878	ENSBTAG00000019027	3	-	42373203	42381939	331	annot_exons	3
novel_circ_001879	ENSBTAG00000008696	8	+	84769024	84769179	156	one_exon	1
novel_circ_001880	ENSBTAG00000013699	6	+	57316622	57321513	784	annot_exons	4
novel_circ_001881	ENSBTAG00000014211	23	-	15405578	15416353	10776	antisense
novel_circ_001882	ENSBTAG00000021134	7	+	19432732	19444601	912	annot_exons	6
novel_circ_001883	ENSBTAG00000007863	2	+	79441933	79458998	703	annot_exons	6
novel_circ_001884	ENSBTAG00000004041	12	-	85354689	85354841	153	one_exon	1
novel_circ_001885	NA	4	-	8979812	8982075	2264	intergenic
novel_circ_001886	ENSBTAG00000003876	28	+	28889702	28891707	365	annot_exons	2
novel_circ_001887	ENSBTAG00000020043	25	-	22623344	22625429	2086	intronic
novel_circ_001888	ENSBTAG00000044087	24	-	20000969	20001642	674	exon_intron
novel_circ_001889	ENSBTAG00000010293	2	+	93621870	93623038	445	annot_exons	2
novel_circ_001890	ENSBTAG00000020700	16	-	41855324	41857707	260	annot_exons	3
novel_circ_001891	ENSBTAG00000005869	9	+	15328476	15346412	1630	annot_exons	9
novel_circ_001892	ENSBTAG00000032657	15	-	39927177	39956045	581	annot_exons	3
novel_circ_001893	ENSBTAG00000002888	5	+	12389315	12389885	571	one_exon	1
novel_circ_001894	ENSBTAG00000010672	12	+	76960422	76967469	349	annot_exons	3
novel_circ_001895	ENSBTAG00000021600	2	-	97948826	97949942	1117	one_exon	1
novel_circ_001896	ENSBTAG00000052058	6	-	115534964	115536907	1944	exon_intron
novel_circ_001897	ENSBTAG00000020495	8	+	112784306	112787346	225	annot_exons	2
novel_circ_001898	ENSBTAG00000012687	7	-	16180447	16180998	552	one_exon	1
novel_circ_001899	ENSBTAG00000004746	19	-	63168604	63212355	3046	annot_exons	14
novel_circ_001900	ENSBTAG00000021964	14	+	70158969	70177379	1401	annot_exons	9
novel_circ_001901	ENSBTAG00000004188	7	-	3458989	3459533	545	one_exon	1
novel_circ_001902	ENSBTAG00000016260	5	-	40515217	40535111	1282	annot_exons	8
novel_circ_001903	ENSBTAG00000004257	24	-	30565121	30585257	1343	annot_exons	7
novel_circ_001904	ENSBTAG00000018697	X	+	2579425	2579595	171	one_exon	1
novel_circ_001905	ENSBTAG00000018646	8	+	67317577	67318005	429	exon_intron
novel_circ_001906	ENSBTAG00000007922	13	+	51242220	51244429	85	annot_exons	2
novel_circ_001907	ENSBTAG00000006209	14	+	46157581	46165417	7837	exon_intron
novel_circ_001908	ENSBTAG00000012077	26	+	21777020	21779293	451	annot_exons	4
novel_circ_001909	ENSBTAG00000008583	28	+	26625918	26683627	52253	exon_intron
novel_circ_001910	ENSBTAG00000015614	12	+	32381127	32391559	888	annot_exons	4
novel_circ_001911	ENSBTAG00000010718	16	+	60201459	60211264	310	annot_exons	3
novel_circ_001912	ENSBTAG00000018966	26	+	15778126	15787760	1005	annot_exons	7
novel_circ_001913	ENSBTAG00000003559	21	-	68365048	68370142	268	annot_exons	2
novel_circ_001914	ENSBTAG00000009770	2	+	39698743	39705730	6988	antisense
novel_circ_001915	ENSBTAG00000018879	23	-	3090038	3112995	812	annot_exons	6
novel_circ_001916	NA	17	+	51723686	51723836	151	intergenic
novel_circ_001917	ENSBTAG00000033298	19	-	19489765	19492799	1355	annot_exons	3
novel_circ_001918	ENSBTAG00000018225	18	+	47919499	47919655	157	intronic
novel_circ_001919	ENSBTAG00000019455	24	-	49668727	49673797	317	annot_exons	2
novel_circ_001920	NA	27	+	6220636	6222367	1732	intergenic
novel_circ_001921	ENSBTAG00000007930	13	-	64108425	64112876	388	annot_exons	2
novel_circ_001922	ENSBTAG00000018427	1	-	132236202	132244319	8118	exon_intron
novel_circ_001923	ENSBTAG00000051770	16	-	49879674	49880008	335	exon_intron
novel_circ_001924	ENSBTAG00000018660	5	+	119720278	119728007	430	annot_exons	2
novel_circ_001925	ENSBTAG00000044029	10	+	28575429	28586936	11508	exon_intron
novel_circ_001926	ENSBTAG00000052059	14	-	12358524	12382280	23757	exon_intron
novel_circ_001927	ENSBTAG00000016999	1	+	135136453	135158085	825	annot_exons	8
novel_circ_001928	ENSBTAG00000000357	27	-	24443144	24443426	283	intronic
novel_circ_001929	ENSBTAG00000009150	15	-	38559640	38559914	275	intronic
novel_circ_001930	ENSBTAG00000004902	14	-	69482694	69503235	1622	annot_exons	13
novel_circ_001931	NA	1	+	3244149	3264386	20238	intergenic
novel_circ_001932	ENSBTAG00000021566	26	+	21605295	21634436	573	annot_exons	4
novel_circ_001933	NA	1	-	125938514	125947514	9001	intergenic
novel_circ_001934	ENSBTAG00000001342	10	+	55105067	55112730	1305	annot_exons	5
novel_circ_001935	ENSBTAG00000008183	X	-	121452079	121454262	232	annot_exons	2
novel_circ_001936	ENSBTAG00000016080	16	-	41328803	41332547	453	annot_exons	3
novel_circ_001937	ENSBTAG00000002676	18	+	54183330	54193193	529	annot_exons	4
novel_circ_001938	ENSBTAG00000019877	3	+	83066542	83074928	828	annot_exons	6
novel_circ_001939	ENSBTAG00000013042	10	-	69653686	69655795	438	annot_exons	3
novel_circ_001940	ENSBTAG00000008597	14	+	2686959	2687598	640	one_exon	1
novel_circ_001941	ENSBTAG00000049835	14	-	12543043	12584203	30087	exon_intron
novel_circ_001942	ENSBTAG00000007236	27	-	19286418	19292011	512	annot_exons	4
novel_circ_001943	ENSBTAG00000010355	27	-	19970318	19972969	291	annot_exons	3
novel_circ_001944	ENSBTAG00000001533	9	+	45229240	45230133	347	annot_exons	2
novel_circ_001945	ENSBTAG00000044063	24	+	25481492	25525385	1101	annot_exons	8
novel_circ_001946	ENSBTAG00000016228	1	-	106161757	106168019	440	annot_exons	4
novel_circ_001947	ENSBTAG00000008696	8	+	84831810	84832424	376	annot_exons	2
novel_circ_001948	ENSBTAG00000039132	26	+	17318538	17339195	763	annot_exons	6
novel_circ_001949	ENSBTAG00000016951	2	-	112021575	112022796	233	annot_exons	2
novel_circ_001950	ENSBTAG00000000434	15	+	22245484	22245638	155	antisense
novel_circ_001951	ENSBTAG00000016282	21	+	67990227	67992381	584	annot_exons	4
novel_circ_001952	ENSBTAG00000003855	X	-	91609471	91611334	330	annot_exons	2
novel_circ_001953	ENSBTAG00000005633	20	-	7757645	7773790	1017	annot_exons	8
novel_circ_001954	ENSBTAG00000016000	2	+	91235148	91268961	8998	exon_intron
novel_circ_001955	ENSBTAG00000013057	1	-	50348426	50358084	480	annot_exons	4
novel_circ_001956	NA	27	+	6221572	6223465	1894	intergenic
novel_circ_001957	ENSBTAG00000048809	17	+	52667953	52668186	234	one_exon	1
novel_circ_001958	ENSBTAG00000023563	23	-	27126617	27148802	16625	exon_intron
novel_circ_001959	ENSBTAG00000014451	1	-	83334906	83395999	3085	annot_exons	20
novel_circ_001960	ENSBTAG00000015683	7	+	44640691	44642116	229	annot_exons	2
novel_circ_001961	ENSBTAG00000020296	2	-	26372011	26384300	395	annot_exons	3
novel_circ_001962	ENSBTAG00000007833	24	-	46543577	46543845	269	intronic
novel_circ_001963	ENSBTAG00000002210	X	+	94954212	94964880	1398	annot_exons	7
novel_circ_001964	ENSBTAG00000019036	24	+	39852727	39857154	4428	intronic
novel_circ_001965	ENSBTAG00000021921	11	-	94340131	94342661	389	annot_exons	2
novel_circ_001966	ENSBTAG00000008963	17	+	55604115	55637667	779	annot_exons	5
novel_circ_001967	ENSBTAG00000000024	24	-	48970950	48978408	488	annot_exons	3
novel_circ_001968	ENSBTAG00000000290	1	-	84153744	84161392	632	annot_exons	4
novel_circ_001969	ENSBTAG00000011623	19	+	10690606	10735392	740	annot_exons	6
novel_circ_001970	ENSBTAG00000050426	11	+	97175819	97193918	458	annot_exons	4
novel_circ_001971	NA	27	+	6220636	6223876	3241	intergenic
novel_circ_001972	ENSBTAG00000021374	7	+	12632893	12633400	338	annot_exons	3
novel_circ_001973	ENSBTAG00000012068	19	+	11281338	11350675	1749	annot_exons	10
novel_circ_001974	ENSBTAG00000040088	6	+	21821121	21822236	271	annot_exons	2
novel_circ_001975	ENSBTAG00000001592	4	+	117129102	117131215	392	annot_exons	3
novel_circ_001976	NA	27	-	6220379	6220668	290	intergenic
novel_circ_001977	ENSBTAG00000000088	1	+	50090623	50111690	918	annot_exons	7
novel_circ_001978	ENSBTAG00000010935	11	+	24672083	24702865	1184	annot_exons	11
novel_circ_001979	ENSBTAG00000011905	15	+	38431604	38441711	438	annot_exons	5
novel_circ_001980	ENSBTAG00000031598	25	+	27671416	27682286	620	annot_exons	7
novel_circ_001981	ENSBTAG00000010437	4	+	95206406	95209616	403	annot_exons	3
novel_circ_001982	ENSBTAG00000006322	15	+	43426856	43457008	1786	annot_exons	11
novel_circ_001983	ENSBTAG00000000942	28	-	5282717	5282991	275	one_exon	1
novel_circ_001984	ENSBTAG00000027321	3	-	50248024	50277953	1192	annot_exons	8
novel_circ_001985	ENSBTAG00000013879	12	+	12333152	12337230	2918	exon_intron
novel_circ_001986	ENSBTAG00000032477	21	-	41709708	41720789	1169	annot_exons	8
novel_circ_001987	ENSBTAG00000016750	8	-	101657183	101658928	286	annot_exons	2
novel_circ_001988	ENSBTAG00000037383	21	+	16481473	16487938	305	annot_exons	2
novel_circ_001989	ENSBTAG00000012565	10	-	82583700	82584015	316	antisense
novel_circ_001990	ENSBTAG00000017326	3	+	87489830	87523695	1384	annot_exons	7
novel_circ_001991	ENSBTAG00000032839	1	-	70241373	70258859	784	annot_exons	9
novel_circ_001992	ENSBTAG00000004208	5	-	104037670	104039168	842	annot_exons	2
novel_circ_001993	ENSBTAG00000016549	23	-	32313824	32352727	1110	annot_exons	9
novel_circ_001994	ENSBTAG00000016185	16	-	28600205	28609616	344	annot_exons	2
novel_circ_001995	ENSBTAG00000021535	4	-	33089330	33114098	1062	annot_exons	10
novel_circ_001996	ENSBTAG00000017567	19	-	13463844	13483323	886	annot_exons	7
novel_circ_001997	ENSBTAG00000038251	12	+	11483353	11495807	637	annot_exons	5
novel_circ_001998	ENSBTAG00000003330	29	-	42016805	42031740	804	annot_exons	7
[truncated: 2,369 more rows]
