# Supplementary material for: Identification and functional analysis of circular RNAs during mitochondrial damage induced by infectious bovine rhinotracheitis virus infection in Madin–Darby bovine kidney cells
Source: Research Square preprint supplement (doi:10.21203/rs.3.rs-6754910/v1), 2025-06-20
Supplement: Supplementary file 12 [file 9ab93088eba9721af739775f.xlsx]

## Sheet: Table S7
Table S7：Source genes of differentially expressed circRNAs
id	source_gene	chr	strand	genomic_start	genomic_end	spliced_length
novel_circ_000011	ENSBTAG00000030801	10	+	72976684	72983216	267
novel_circ_000016	ENSBTAG00000014229	25	-	16750622	16758137	7516
novel_circ_000084	ENSBTAG00000026371	25	+	10769390	10775248	278
novel_circ_000157	ENSBTAG00000003378	1	+	72222453	72223387	174
novel_circ_000181	NA	10	+	559428	559675	248
novel_circ_000201	ENSBTAG00000003934	12	+	36275150	36297445	829
novel_circ_000224	ENSBTAG00000006786	10	-	82215521	82220418	560
novel_circ_000227	ENSBTAG00000016287	19	-	55791865	55799969	1733
novel_circ_000232	ENSBTAG00000006323	9	+	94463432	94466225	288
novel_circ_000237	ENSBTAG00000018307	22	-	50170397	50170785	389
novel_circ_000239	ENSBTAG00000000700	15	-	40235427	40238681	264
novel_circ_000246	ENSBTAG00000016002	20	+	6696257	6700315	493
novel_circ_000259	ENSBTAG00000016656	1	+	67048922	67051120	734
novel_circ_000408	ENSBTAG00000018437	8	+	46417536	46466576	868
novel_circ_000493	ENSBTAG00000017128	23	+	39770295	39787931	1284
novel_circ_000597	ENSBTAG00000046185	21	-	57913323	57915074	1268
novel_circ_000627	ENSBTAG00000032848	20	+	41472666	41475890	247
novel_circ_000660	ENSBTAG00000009351	5	+	116069561	116094098	782
novel_circ_000685	ENSBTAG00000039172	11	+	94123536	94175392	1906
novel_circ_000696	ENSBTAG00000044190	14	-	70484257	70486303	381
novel_circ_000704	ENSBTAG00000010542	24	-	42911202	42912506	217
novel_circ_000720	ENSBTAG00000018460	20	-	67883978	67892994	1052
novel_circ_000844	ENSBTAG00000017788	16	+	33576450	33583816	252
novel_circ_000847	ENSBTAG00000018272	16	+	44858433	44874727	1311
novel_circ_000848	ENSBTAG00000035265	17	-	180310	182370	1745
novel_circ_000866	ENSBTAG00000016105	7	-	46847798	46848546	305
novel_circ_000876	ENSBTAG00000004448	15	-	76730976	76734170	520
novel_circ_000928	ENSBTAG00000054497	1	-	1370245	1391377	18003
novel_circ_000933	ENSBTAG00000001600	6	+	67740025	67764471	481
novel_circ_000980	ENSBTAG00000038181	8	-	23671086	23699434	421
novel_circ_000987	ENSBTAG00000006031	7	+	90339031	90340136	1106
novel_circ_001043	ENSBTAG00000001652	21	-	15219274	15232378	13105
novel_circ_001046	ENSBTAG00000015553	11	-	95937949	95941477	425
novel_circ_001049	ENSBTAG00000018004	21	-	24535387	24549705	507
novel_circ_001068	ENSBTAG00000001057	5	-	113626217	113631287	347
novel_circ_001086	NA	27	-	6220566	6220773	208
novel_circ_001112	ENSBTAG00000044150	3	-	3002041	3003076	257
novel_circ_001165	ENSBTAG00000010718	16	+	60166350	60173341	301
novel_circ_001209	ENSBTAG00000048271	5	-	109229057	109235547	1022
novel_circ_001229	NA	22	-	39591050	39596962	5913
novel_circ_001243	ENSBTAG00000026673	9	-	33908545	33918596	678
novel_circ_001245	ENSBTAG00000054448	14	-	60626602	60654926	1232
novel_circ_001256	ENSBTAG00000012443	12	+	2613425	2613617	193
novel_circ_001267	ENSBTAG00000020552	16	-	53874978	53886608	375
novel_circ_001300	ENSBTAG00000014752	12	-	12412623	12414870	2248
novel_circ_001318	ENSBTAG00000000241	13	-	77269640	77271195	305
novel_circ_001323	ENSBTAG00000005442	3	+	78420300	78450004	779
novel_circ_001338	ENSBTAG00000005362	23	+	3019707	3033966	546
novel_circ_001344	NA	3	+	57973480	57974834	1355
novel_circ_001435	ENSBTAG00000017051	3	+	21980423	21981393	536
novel_circ_001449	ENSBTAG00000030670	1	+	146091628	146093485	489
novel_circ_001457	ENSBTAG00000002485	2	-	105986194	105987537	183
novel_circ_001459	ENSBTAG00000016999	1	+	135109176	135129520	556
novel_circ_001469	ENSBTAG00000017455	27	+	34162164	34173963	236
novel_circ_001482	ENSBTAG00000015753	4	-	43476701	43480930	281
novel_circ_001533	ENSBTAG00000001895	10	-	4072827	4079033	353
novel_circ_001549	ENSBTAG00000047550	8	+	38740558	38741975	1418
novel_circ_001595	ENSBTAG00000031725	19	-	27229889	27291700	61812
novel_circ_001669	ENSBTAG00000052059	14	-	12534875	12535336	462
novel_circ_001681	ENSBTAG00000030962	22	-	59449223	59457625	470
novel_circ_001771	ENSBTAG00000044063	24	+	25481492	25492170	231
novel_circ_001806	ENSBTAG00000009020	11	+	18906829	18908268	364
novel_circ_001814	ENSBTAG00000011981	14	-	30834389	30843144	1041
novel_circ_001853	ENSBTAG00000017788	16	+	33496286	33532138	383
novel_circ_001886	ENSBTAG00000003876	28	+	28889702	28891707	365
novel_circ_001900	ENSBTAG00000021964	14	+	70158969	70177379	1401
novel_circ_001945	ENSBTAG00000044063	24	+	25481492	25525385	1101
novel_circ_001980	ENSBTAG00000031598	25	+	27671416	27682286	620
novel_circ_001990	ENSBTAG00000017326	3	+	87489830	87523695	1384
novel_circ_002187	ENSBTAG00000017175	25	+	38644508	38654013	420
novel_circ_002194	ENSBTAG00000013899	13	+	46464191	46465683	215
novel_circ_002217	ENSBTAG00000012142	22	+	17647810	17652730	313
novel_circ_002262	ENSBTAG00000013918	6	+	77330342	77331142	801
novel_circ_002263	ENSBTAG00000004653	6	-	42015093	42031882	789
novel_circ_002368	NA	27	-	6220379	6220786	408
novel_circ_002379	ENSBTAG00000001280	15	-	52021869	52022100	232
novel_circ_002385	ENSBTAG00000011875	25	-	33084639	33087640	537
novel_circ_002424	ENSBTAG00000001545	6	+	45181176	45182529	1354
novel_circ_002440	ENSBTAG00000016316	19	-	24696744	24698658	367
novel_circ_002459	ENSBTAG00000012443	12	+	2509328	2536292	420
novel_circ_002466	ENSBTAG00000009565	7	+	87021896	87023691	303
novel_circ_002475	ENSBTAG00000016504	3	+	115427464	115446979	328
novel_circ_002477	ENSBTAG00000052736	8	+	40368241	40369287	1047
novel_circ_002480	ENSBTAG00000027569	6	-	59825537	59835602	416
novel_circ_002511	ENSBTAG00000009121	X	+	8326709	8334475	388
novel_circ_002533	ENSBTAG00000009267	23	+	8831061	8832195	294
novel_circ_002538	ENSBTAG00000006158	1	+	53405807	53412064	325
novel_circ_002584	ENSBTAG00000013658	5	+	107807499	107808323	825
novel_circ_002587	ENSBTAG00000014230	21	+	61676138	61681024	221
novel_circ_002608	ENSBTAG00000003746	3	-	93341091	93423122	30596
novel_circ_002631	ENSBTAG00000021078	5	-	88732101	88734274	261
novel_circ_002632	ENSBTAG00000004489	19	+	12467691	12474277	365
novel_circ_002670	ENSBTAG00000015559	3	+	101735483	101746713	380
novel_circ_002715	ENSBTAG00000016397	23	-	49620966	49621632	667
novel_circ_002745	ENSBTAG00000018074	3	+	19628701	19629709	445
novel_circ_002764	ENSBTAG00000008153	16	+	79435633	79448763	528
novel_circ_002790	ENSBTAG00000004315	3	-	120427866	120429078	778
novel_circ_002834	NA	2	-	8047503	8061429	13927
novel_circ_002840	ENSBTAG00000006697	20	+	35433784	35436226	297
novel_circ_002867	NA	9	-	89217570	89222583	5014
novel_circ_002876	ENSBTAG00000025443	7	+	22798806	22805487	1897
novel_circ_002958	ENSBTAG00000009020	11	+	18854667	18854840	174
novel_circ_002965	ENSBTAG00000006328	22	-	50297761	50321310	1624
novel_circ_003014	ENSBTAG00000014889	1	-	43171696	43171923	228
novel_circ_003020	ENSBTAG00000054987	4	+	32363511	32368872	359
novel_circ_003024	ENSBTAG00000000830	28	+	8872342	8879425	502
novel_circ_003040	ENSBTAG00000019354	11	-	46938804	46944062	755
novel_circ_003111	ENSBTAG00000012314	7	+	15561163	15563528	510
novel_circ_003130	ENSBTAG00000010599	2	-	71115739	71151484	1714
novel_circ_003155	ENSBTAG00000013153	17	+	68786689	68791656	333
novel_circ_003156	ENSBTAG00000019197	13	-	42993495	43017146	715
novel_circ_003170	ENSBTAG00000021217	3	+	40518592	40518841	250
novel_circ_003178	ENSBTAG00000003052	15	-	27919350	27920469	301
novel_circ_003199	ENSBTAG00000054531	11	+	43826699	43841855	1097
novel_circ_003236	ENSBTAG00000022155	1	-	65145827	65146369	224
novel_circ_003262	ENSBTAG00000015504	20	-	31571181	31579522	386
novel_circ_003284	ENSBTAG00000014182	7	+	50101475	50146696	1064
novel_circ_003292	ENSBTAG00000043981	15	+	42685749	42690657	465
novel_circ_003305	ENSBTAG00000016168	29	+	36296706	36305036	829
novel_circ_003307	ENSBTAG00000030855	22	-	60366750	60371964	327
novel_circ_003355	ENSBTAG00000021289	3	+	19338741	19339998	1258
novel_circ_003400	ENSBTAG00000020791	11	-	101752185	101762410	590
novel_circ_003401	ENSBTAG00000049010	17	+	16916627	16916893	267
novel_circ_003591	ENSBTAG00000015073	4	-	24875734	24908858	427
novel_circ_003595	ENSBTAG00000013271	19	+	33343013	33354135	511
novel_circ_003608	ENSBTAG00000020480	10	-	88731622	88736196	453
novel_circ_003627	ENSBTAG00000017048	12	+	36486712	36494600	1049
novel_circ_003635	ENSBTAG00000021896	11	+	101353652	101356157	287
novel_circ_003707	ENSBTAG00000003746	3	-	93341091	93365353	577
novel_circ_003752	ENSBTAG00000000586	20	+	37057098	37088360	4948
novel_circ_003863	ENSBTAG00000037457	24	-	53613098	53614387	1290
novel_circ_003867	ENSBTAG00000011904	X	-	37156092	37208671	38874
novel_circ_003929	ENSBTAG00000037400	25	+	38909644	38911383	1740
novel_circ_003951	ENSBTAG00000003552	29	-	1033657	1039763	893
novel_circ_003958	ENSBTAG00000011761	5	+	97652048	97660067	1246
novel_circ_004044	ENSBTAG00000024688	9	-	18609346	18630780	451
novel_circ_004067	ENSBTAG00000004240	5	+	62694549	62711167	984
novel_circ_004264	ENSBTAG00000000207	X	+	135654309	135658519	4211
novel_circ_004280	ENSBTAG00000003185	14	+	10559413	10563370	390
novel_circ_004320	ENSBTAG00000011333	22	-	7782373	7825999	1542
novel_circ_004321	ENSBTAG00000018689	19	-	15087799	15090619	773
novel_circ_004326	ENSBTAG00000020657	27	-	16526497	16529779	3283
novel_circ_004328	ENSBTAG00000022003	13	-	33049636	33050784	264
novel_circ_004338	ENSBTAG00000014167	15	+	51612432	51619125	384
