# Supplementary material for: Identification and functional analysis of circular RNAs during mitochondrial damage induced by infectious bovine rhinotracheitis virus infection in Madin–Darby bovine kidney cells
Source: Research Square preprint supplement (doi:10.21203/rs.3.rs-6754910/v1), 2025-06-20
Supplement: Supplementary file 13 [file 9d160d9375ec94525be3d708.xlsx]

## Sheet: Table S23
Table S23: circRNA primer sequences
Primer name	Sequence (5'-3')
circ_002584-convergent forward primer	GCCTCCCAGAGTTCCGTGTT
circ_002584-convergent reverse primer	CCCGCTGCTCGCTATGTT
circ_002584-divergent forward primer	CTCCACCGTTCCTCACTCC
circ_002584-divergent reverse primer	CTGAGCGGGCACTTCCAT
circ_004326-convergent forward primer	ACAGCCTACAAAGCATCT
circ_004326-convergent reverse primer	CCCTAAGCCATCCATCA
circ_004326-divergent forward primer	GCCCACGACCCTGATT
circ_004326-divergent reverse primer	TTCGCTGCCGAGTTTT
GAPDH forward primer	GTCGGAGTGAACGGATTTGG
GAPDH reverse primer	CGTTCTCTGCCTTGACTGTG
siRNA of circRNAs
Sequence name	Sequence (5'-3')
	sense	antisense
si-circ-002584	GGAGGAGAACCAGAUAAUGTT	CAUUAUCUGGUUCUCCUCCTT
si-circ-004326	AAACAGGUGCCUGACAGUUTT	AACUGUCAGGCACCUGUUUTT
siRNA-NC	UUCUCCGAACGUGUCACGUTT	ACGUGACACGUUCGGAGAATT
