# Supplementary material for: Identification and functional analysis of circular RNAs during mitochondrial damage induced by infectious bovine rhinotracheitis virus infection in Madin–Darby bovine kidney cells
Source: Research Square preprint supplement (doi:10.21203/rs.3.rs-6754910/v1), 2025-06-20
Supplement: Supplementary file 14 [file b21cb304b05ef6b7977ac325.xlsx]

## Sheet: Table S13
Table S13: GO enrichment analysis of candidate target genes of differentially expressed miRNAs
class	GO ID	Description	out (4656)	All (17432)	pvalue	p.adjust	Genes
Cellular Component	GO:0005829	cytosol	1223	2880	1.83e-90	1.28e-88	ENSBTAG00000000013;ENSBTAG00000000025;ENSBTAG00000000030;ENSBTAG00000000080;ENSBTAG00000000081;ENSBTAG00000000092;ENSBTAG00000000147;ENSBTAG00000000149;ENSBTAG00000000162;ENSBTAG00000000163;ENSBTAG00000000184;ENSBTAG00000000201;ENSBTAG00000000203;ENSBTAG00000000222;ENSBTAG00000000224;ENSBTAG00000000241;ENSBTAG00000000267;ENSBTAG00000000274;ENSBTAG00000000286;ENSBTAG00000000288;ENSBTAG00000000296;…
Cellular Component	GO:0005856	cytoskeleton	639	1705	7.25e-25	2.74e-23	ENSBTAG00000000113;ENSBTAG00000000146;ENSBTAG00000000322;ENSBTAG00000000347;ENSBTAG00000000371;ENSBTAG00000000458;ENSBTAG00000000526;ENSBTAG00000000545;ENSBTAG00000000630;ENSBTAG00000000660;ENSBTAG00000000687;ENSBTAG00000000700;ENSBTAG00000000711;ENSBTAG00000000738;ENSBTAG00000000746;ENSBTAG00000000752;ENSBTAG00000000754;ENSBTAG00000000833;ENSBTAG00000000836;ENSBTAG00000001050;ENSBTAG00000001069;…
Cellular Component	GO:0005739	mitochondrion	471	1308	9.76e-15	2.49e-13	ENSBTAG00000000014;ENSBTAG00000000042;ENSBTAG00000000064;ENSBTAG00000000081;ENSBTAG00000000094;ENSBTAG00000000152;ENSBTAG00000000163;ENSBTAG00000000222;ENSBTAG00000000274;ENSBTAG00000000291;ENSBTAG00000000404;ENSBTAG00000000417;ENSBTAG00000000428;ENSBTAG00000000434;ENSBTAG00000000455;ENSBTAG00000000475;ENSBTAG00000000550;ENSBTAG00000000555;ENSBTAG00000000562;ENSBTAG00000000647;ENSBTAG00000000705;…
Cellular Component	GO:0005794	Golgi apparatus	452	1029	9.26e-35	3.93e-33	ENSBTAG00000000025;ENSBTAG00000000073;ENSBTAG00000000078;ENSBTAG00000000081;ENSBTAG00000000113;ENSBTAG00000000205;ENSBTAG00000000274;ENSBTAG00000000279;ENSBTAG00000000312;ENSBTAG00000000342;ENSBTAG00000000379;ENSBTAG00000000390;ENSBTAG00000000446;ENSBTAG00000000555;ENSBTAG00000000625;ENSBTAG00000000676;ENSBTAG00000000678;ENSBTAG00000000807;ENSBTAG00000000944;ENSBTAG00000000948;ENSBTAG00000000985;…
Cellular Component	GO:0005694	chromosome	411	933	6.51e-32	2.61e-30	ENSBTAG00000000022;ENSBTAG00000000023;ENSBTAG00000000039;ENSBTAG00000000064;ENSBTAG00000000098;ENSBTAG00000000162;ENSBTAG00000000252;ENSBTAG00000000372;ENSBTAG00000000375;ENSBTAG00000000385;ENSBTAG00000000469;ENSBTAG00000000526;ENSBTAG00000000579;ENSBTAG00000000590;ENSBTAG00000000629;ENSBTAG00000000647;ENSBTAG00000000746;ENSBTAG00000000752;ENSBTAG00000000837;ENSBTAG00000001024;ENSBTAG00000001042;…
Cellular Component	GO:0031982	vesicle	341	937	1.48e-11	2.95e-10	ENSBTAG00000000025;ENSBTAG00000000113;ENSBTAG00000000260;ENSBTAG00000000322;ENSBTAG00000000347;ENSBTAG00000000393;ENSBTAG00000000460;ENSBTAG00000000484;ENSBTAG00000000764;ENSBTAG00000000778;ENSBTAG00000000807;ENSBTAG00000000985;ENSBTAG00000001013;ENSBTAG00000001105;ENSBTAG00000001244;ENSBTAG00000001332;ENSBTAG00000001394;ENSBTAG00000001483;ENSBTAG00000001632;ENSBTAG00000001657;ENSBTAG00000001662;…
Cellular Component	GO:0005768	endosome	273	604	2.28e-23	8.41e-22	ENSBTAG00000000073;ENSBTAG00000000274;ENSBTAG00000000320;ENSBTAG00000000411;ENSBTAG00000000446;ENSBTAG00000000616;ENSBTAG00000000676;ENSBTAG00000000710;ENSBTAG00000000711;ENSBTAG00000000717;ENSBTAG00000000871;ENSBTAG00000000985;ENSBTAG00000001015;ENSBTAG00000001050;ENSBTAG00000001181;ENSBTAG00000001193;ENSBTAG00000001269;ENSBTAG00000001352;ENSBTAG00000001403;ENSBTAG00000001489;ENSBTAG00000001632;…
Cellular Component	GO:0005813	centrosome	229	551	1.25e-14	3.12e-13	ENSBTAG00000000322;ENSBTAG00000000371;ENSBTAG00000000458;ENSBTAG00000000545;ENSBTAG00000000687;ENSBTAG00000000711;ENSBTAG00000000746;ENSBTAG00000000752;ENSBTAG00000000754;ENSBTAG00000001069;ENSBTAG00000001352;ENSBTAG00000001564;ENSBTAG00000001575;ENSBTAG00000001602;ENSBTAG00000001634;ENSBTAG00000001673;ENSBTAG00000001700;ENSBTAG00000001717;ENSBTAG00000001736;ENSBTAG00000001822;ENSBTAG00000001848;…
Cellular Component	GO:0005819	spindle	144	277	2.09e-19	6.82e-18	ENSBTAG00000000630;ENSBTAG00000000660;ENSBTAG00000000687;ENSBTAG00000000752;ENSBTAG00000001182;ENSBTAG00000001463;ENSBTAG00000001575;ENSBTAG00000001700;ENSBTAG00000001717;ENSBTAG00000001776;ENSBTAG00000001848;ENSBTAG00000002072;ENSBTAG00000002117;ENSBTAG00000002298;ENSBTAG00000002331;ENSBTAG00000002726;ENSBTAG00000003215;ENSBTAG00000003314;ENSBTAG00000003545;ENSBTAG00000003908;ENSBTAG00000004051;…
Cellular Component	GO:0030496	midbody	76	137	9.14e-13	2.03e-11	ENSBTAG00000001182;ENSBTAG00000001352;ENSBTAG00000001700;ENSBTAG00000001717;ENSBTAG00000001776;ENSBTAG00000002393;ENSBTAG00000002411;ENSBTAG00000003298;ENSBTAG00000003362;ENSBTAG00000003543;ENSBTAG00000003804;ENSBTAG00000004279;ENSBTAG00000004416;ENSBTAG00000004544;ENSBTAG00000004792;ENSBTAG00000004844;ENSBTAG00000005129;ENSBTAG00000005432;ENSBTAG00000006413;ENSBTAG00000006574;ENSBTAG00000007606;…
class	GO ID	Description	out (4428)	All (16553)	pvalue	p.adjust	Genes
Molecular Function	GO:0003676	nucleic acid binding	1000	3195	9.72e-11	4.3e-09	ENSBTAG00000000030;ENSBTAG00000000064;ENSBTAG00000000080;ENSBTAG00000000098;ENSBTAG00000000099;ENSBTAG00000000108;ENSBTAG00000000132;ENSBTAG00000000222;ENSBTAG00000000241;ENSBTAG00000000267;ENSBTAG00000000288;ENSBTAG00000000296;ENSBTAG00000000332;ENSBTAG00000000340;ENSBTAG00000000371;ENSBTAG00000000375;ENSBTAG00000000385;ENSBTAG00000000392;ENSBTAG00000000439;ENSBTAG00000000455;ENSBTAG00000000527;…
Molecular Function	GO:0036094	small molecule binding	852	2240	1.65e-36	2.74e-34	ENSBTAG00000000013;ENSBTAG00000000025;ENSBTAG00000000039;ENSBTAG00000000056;ENSBTAG00000000092;ENSBTAG00000000105;ENSBTAG00000000132;ENSBTAG00000000184;ENSBTAG00000000231;ENSBTAG00000000279;ENSBTAG00000000286;ENSBTAG00000000291;ENSBTAG00000000296;ENSBTAG00000000342;ENSBTAG00000000347;ENSBTAG00000000357;ENSBTAG00000000396;ENSBTAG00000000404;ENSBTAG00000000446;ENSBTAG00000000458;ENSBTAG00000000460;…
Molecular Function	GO:0005524	ATP binding	540	1282	1.69e-35	2.36e-33	ENSBTAG00000000013;ENSBTAG00000000056;ENSBTAG00000000132;ENSBTAG00000000184;ENSBTAG00000000231;ENSBTAG00000000286;ENSBTAG00000000357;ENSBTAG00000000396;ENSBTAG00000000446;ENSBTAG00000000458;ENSBTAG00000000607;ENSBTAG00000000632;ENSBTAG00000000647;ENSBTAG00000000710;ENSBTAG00000000738;ENSBTAG00000000778;ENSBTAG00000000806;ENSBTAG00000000815;ENSBTAG00000000894;ENSBTAG00000000974;ENSBTAG00000001014;…
Molecular Function	GO:0003723	RNA binding	463	1090	2.43e-31	2.69e-29	ENSBTAG00000000030;ENSBTAG00000000108;ENSBTAG00000000132;ENSBTAG00000000241;ENSBTAG00000000267;ENSBTAG00000000288;ENSBTAG00000000371;ENSBTAG00000000392;ENSBTAG00000000439;ENSBTAG00000000555;ENSBTAG00000000613;ENSBTAG00000000630;ENSBTAG00000000678;ENSBTAG00000000817;ENSBTAG00000000955;ENSBTAG00000000957;ENSBTAG00000000974;ENSBTAG00000001035;ENSBTAG00000001038;ENSBTAG00000001044;ENSBTAG00000001055;…
Molecular Function	GO:0019900	kinase binding	270	552	1.15e-29	1.22e-27	ENSBTAG00000000031;ENSBTAG00000000286;ENSBTAG00000000317;ENSBTAG00000000321;ENSBTAG00000000347;ENSBTAG00000000484;ENSBTAG00000000546;ENSBTAG00000000613;ENSBTAG00000000660;ENSBTAG00000000746;ENSBTAG00000000752;ENSBTAG00000000754;ENSBTAG00000000837;ENSBTAG00000000871;ENSBTAG00000000878;ENSBTAG00000001014;ENSBTAG00000001069;ENSBTAG00000001189;ENSBTAG00000001294;ENSBTAG00000001528;ENSBTAG00000001575;…
Molecular Function	GO:0003779	actin binding	140	363	4.63e-07	1.41e-05	ENSBTAG00000000369;ENSBTAG00000000700;ENSBTAG00000000764;ENSBTAG00000000897;ENSBTAG00000000937;ENSBTAG00000001332;ENSBTAG00000001640;ENSBTAG00000001961;ENSBTAG00000002082;ENSBTAG00000002117;ENSBTAG00000002539;ENSBTAG00000002727;ENSBTAG00000002996;ENSBTAG00000003191;ENSBTAG00000003265;ENSBTAG00000003401;ENSBTAG00000003418;ENSBTAG00000004072;ENSBTAG00000004242;ENSBTAG00000004553;ENSBTAG00000004554;…
Molecular Function	GO:0048037	cofactor binding	90	232	3.79e-05	0.000839	ENSBTAG00000000039;ENSBTAG00000000160;ENSBTAG00000000291;ENSBTAG00000000505;ENSBTAG00000000837;ENSBTAG00000001036;ENSBTAG00000001165;ENSBTAG00000001731;ENSBTAG00000001776;ENSBTAG00000001908;ENSBTAG00000002049;ENSBTAG00000002220;ENSBTAG00000002980;ENSBTAG00000003072;ENSBTAG00000003162;ENSBTAG00000003397;ENSBTAG00000003746;ENSBTAG00000003758;ENSBTAG00000004059;ENSBTAG00000004171;ENSBTAG00000004367;…
Molecular Function	GO:0043130	ubiquitin binding	51	95	2.28e-08	8.4e-07	ENSBTAG00000000320;ENSBTAG00000001548;ENSBTAG00000001632;ENSBTAG00000002033;ENSBTAG00000002452;ENSBTAG00000002501;ENSBTAG00000003745;ENSBTAG00000003798;ENSBTAG00000003967;ENSBTAG00000004284;ENSBTAG00000004307;ENSBTAG00000005504;ENSBTAG00000005542;ENSBTAG00000006268;ENSBTAG00000007147;ENSBTAG00000007577;ENSBTAG00000008024;ENSBTAG00000008237;ENSBTAG00000008330;ENSBTAG00000008755;ENSBTAG00000009677;…
Molecular Function	GO:0005178	integrin binding	38	100	0.008968	0.079652	ENSBTAG00000002006;ENSBTAG00000002278;ENSBTAG00000003300;ENSBTAG00000004221;ENSBTAG00000005260;ENSBTAG00000006045;ENSBTAG00000006367;ENSBTAG00000007079;ENSBTAG00000008300;ENSBTAG00000008938;ENSBTAG00000009578;ENSBTAG00000009665;ENSBTAG00000009844;ENSBTAG00000009987;ENSBTAG00000010402;ENSBTAG00000010563;ENSBTAG00000010663;ENSBTAG00000012088;ENSBTAG00000012265;ENSBTAG00000013063;ENSBTAG00000013544;…
Molecular Function	GO:0019842	vitamin binding	25	59	0.00669	0.061626	ENSBTAG00000000291;ENSBTAG00000000342;ENSBTAG00000001116;ENSBTAG00000001171;ENSBTAG00000002052;ENSBTAG00000002770;ENSBTAG00000003758;ENSBTAG00000006029;ENSBTAG00000007331;ENSBTAG00000008172;ENSBTAG00000010419;ENSBTAG00000011494;ENSBTAG00000011895;ENSBTAG00000012387;ENSBTAG00000014272;ENSBTAG00000015186;ENSBTAG00000015924;ENSBTAG00000015980;ENSBTAG00000016414;ENSBTAG00000017382;ENSBTAG00000017996;…
class	GO ID	Description	out (4612)	All (17045)	pvalue	p.adjust	Genes
Biological Process	GO:0006810	transport	1155	3526	2.03e-17	1.15e-15	ENSBTAG00000000013;ENSBTAG00000000021;ENSBTAG00000000025;ENSBTAG00000000031;ENSBTAG00000000039;ENSBTAG00000000073;ENSBTAG00000000081;ENSBTAG00000000152;ENSBTAG00000000202;ENSBTAG00000000203;ENSBTAG00000000231;ENSBTAG00000000236;ENSBTAG00000000274;ENSBTAG00000000279;ENSBTAG00000000286;ENSBTAG00000000317;ENSBTAG00000000322;ENSBTAG00000000347;ENSBTAG00000000379;ENSBTAG00000000396;ENSBTAG00000000404;…
Biological Process	GO:0051641	cellular localization	1048	2390	7.54e-82	2e-78	ENSBTAG00000000013;ENSBTAG00000000021;ENSBTAG00000000025;ENSBTAG00000000031;ENSBTAG00000000039;ENSBTAG00000000081;ENSBTAG00000000152;ENSBTAG00000000224;ENSBTAG00000000231;ENSBTAG00000000236;ENSBTAG00000000274;ENSBTAG00000000279;ENSBTAG00000000286;ENSBTAG00000000322;ENSBTAG00000000347;ENSBTAG00000000404;ENSBTAG00000000411;ENSBTAG00000000415;ENSBTAG00000000428;ENSBTAG00000000434;ENSBTAG00000000458;…
Biological Process	GO:0030154	cell differentiation	875	2837	4.9e-07	8.94e-06	ENSBTAG00000000023;ENSBTAG00000000031;ENSBTAG00000000039;ENSBTAG00000000078;ENSBTAG00000000088;ENSBTAG00000000092;ENSBTAG00000000113;ENSBTAG00000000137;ENSBTAG00000000182;ENSBTAG00000000205;ENSBTAG00000000231;ENSBTAG00000000236;ENSBTAG00000000245;ENSBTAG00000000253;ENSBTAG00000000283;ENSBTAG00000000291;ENSBTAG00000000305;ENSBTAG00000000332;ENSBTAG00000000342;ENSBTAG00000000347;ENSBTAG00000000396;…
Biological Process	GO:0016310	phosphorylation	698	1849	1.28e-26	1.47e-24	ENSBTAG00000000013;ENSBTAG00000000031;ENSBTAG00000000056;ENSBTAG00000000078;ENSBTAG00000000113;ENSBTAG00000000152;ENSBTAG00000000160;ENSBTAG00000000163;ENSBTAG00000000184;ENSBTAG00000000205;ENSBTAG00000000212;ENSBTAG00000000231;ENSBTAG00000000236;ENSBTAG00000000283;ENSBTAG00000000286;ENSBTAG00000000305;ENSBTAG00000000317;ENSBTAG00000000357;ENSBTAG00000000396;ENSBTAG00000000411;ENSBTAG00000000428;…
Biological Process	GO:0007049	cell cycle	552	1229	1.98e-44	6.54e-42	ENSBTAG00000000023;ENSBTAG00000000039;ENSBTAG00000000064;ENSBTAG00000000113;ENSBTAG00000000369;ENSBTAG00000000372;ENSBTAG00000000428;ENSBTAG00000000501;ENSBTAG00000000569;ENSBTAG00000000579;ENSBTAG00000000590;ENSBTAG00000000599;ENSBTAG00000000608;ENSBTAG00000000630;ENSBTAG00000000632;ENSBTAG00000000646;ENSBTAG00000000660;ENSBTAG00000000687;ENSBTAG00000000746;ENSBTAG00000000752;ENSBTAG00000000764;…
Biological Process	GO:0048468	cell development	508	1642	0.00013	0.001397	ENSBTAG00000000023;ENSBTAG00000000078;ENSBTAG00000000088;ENSBTAG00000000113;ENSBTAG00000000137;ENSBTAG00000000182;ENSBTAG00000000205;ENSBTAG00000000231;ENSBTAG00000000236;ENSBTAG00000000253;ENSBTAG00000000283;ENSBTAG00000000342;ENSBTAG00000000347;ENSBTAG00000000428;ENSBTAG00000000434;ENSBTAG00000000469;ENSBTAG00000000563;ENSBTAG00000000569;ENSBTAG00000000579;ENSBTAG00000000613;ENSBTAG00000000660;…
Biological Process	GO:0008283	cell proliferation	445	1355	5.39e-07	9.79e-06	ENSBTAG00000000081;ENSBTAG00000000113;ENSBTAG00000000215;ENSBTAG00000000231;ENSBTAG00000000283;ENSBTAG00000000317;ENSBTAG00000000372;ENSBTAG00000000396;ENSBTAG00000000428;ENSBTAG00000000546;ENSBTAG00000000563;ENSBTAG00000000569;ENSBTAG00000000625;ENSBTAG00000000660;ENSBTAG00000000687;ENSBTAG00000000711;ENSBTAG00000000746;ENSBTAG00000000815;ENSBTAG00000000833;ENSBTAG00000000978;ENSBTAG00000001016;…
Biological Process	GO:0016477	cell migration	368	1121	5.76e-06	8.6e-05	ENSBTAG00000000031;ENSBTAG00000000078;ENSBTAG00000000231;ENSBTAG00000000253;ENSBTAG00000000283;ENSBTAG00000000305;ENSBTAG00000000347;ENSBTAG00000000357;ENSBTAG00000000369;ENSBTAG00000000484;ENSBTAG00000000563;ENSBTAG00000000569;ENSBTAG00000000579;ENSBTAG00000000660;ENSBTAG00000000700;ENSBTAG00000000736;ENSBTAG00000000764;ENSBTAG00000000815;ENSBTAG00000001017;ENSBTAG00000001061;ENSBTAG00000001161;…
Biological Process	GO:0000165	MAPK cascade	207	559	1.05e-07	2.11e-06	ENSBTAG00000000031;ENSBTAG00000000078;ENSBTAG00000000160;ENSBTAG00000000236;ENSBTAG00000000317;ENSBTAG00000000411;ENSBTAG00000000484;ENSBTAG00000000563;ENSBTAG00000000660;ENSBTAG00000000815;ENSBTAG00000000878;ENSBTAG00000001083;ENSBTAG00000001168;ENSBTAG00000001632;ENSBTAG00000001692;ENSBTAG00000001700;ENSBTAG00000001774;ENSBTAG00000001815;ENSBTAG00000002006;ENSBTAG00000002095;ENSBTAG00000002625;…
Biological Process	GO:0008380	RNA splicing	175	333	2.49e-23	2.1e-21	ENSBTAG00000000439;ENSBTAG00000001035;ENSBTAG00000001055;ENSBTAG00000001225;ENSBTAG00000001528;ENSBTAG00000001553;ENSBTAG00000001697;ENSBTAG00000001771;ENSBTAG00000001810;ENSBTAG00000002086;ENSBTAG00000002175;ENSBTAG00000002279;ENSBTAG00000002520;ENSBTAG00000002650;ENSBTAG00000002720;ENSBTAG00000002778;ENSBTAG00000002830;ENSBTAG00000002879;ENSBTAG00000002890;ENSBTAG00000003064;ENSBTAG00000003094;…
