# Supplementary material for: Identification and functional analysis of circular RNAs during mitochondrial damage induced by infectious bovine rhinotracheitis virus infection in Madin–Darby bovine kidney cells
Source: Research Square preprint supplement (doi:10.21203/rs.3.rs-6754910/v1), 2025-06-20
Supplement: Supplementary file 15 [file b2d66c1db226800f7053ec54.xlsx]

## Sheet: Table S18
Table S18：CircRNA-miRNA-mitochondria-related target gene regulatory networks
stargeting relationship pairs of 56 miRNAs and 389 miRNAs
miRNA	Symbol	Gene
bta-let-7a-5p	FBXO7	ENSBTAG00000020634
bta-let-7a-5p	FEN1	ENSBTAG00000000064
bta-let-7a-5p	MRS2	ENSBTAG00000004979
bta-let-7a-5p	FKBP10	ENSBTAG00000011454
bta-let-7a-5p	MRPL53	ENSBTAG00000016599
bta-let-7a-5p	RANBP2	ENSBTAG00000000152
bta-let-7a-5p	CAVIN1	ENSBTAG00000039684
bta-let-7a-5p	DCAF8	ENSBTAG00000005796
bta-let-7a-5p	SLC25A24	ENSBTAG00000003752
bta-let-7a-5p	BCL2L1	ENSBTAG00000006526
bta-let-7a-5p	BCL2L1	ENSBTAG00000006526
bta-let-7a-5p	PACS2	ENSBTAG00000046346
bta-let-7a-5p	PACS2	ENSBTAG00000046346
bta-let-7a-5p	PNKD	ENSBTAG00000003936
bta-let-7a-5p	MIEF1	ENSBTAG00000017439
bta-let-7a-5p	RDH13	ENSBTAG00000030393
bta-let-7a-5p	MPV17L2	ENSBTAG00000025788
bta-let-7a-5p	MPV17L2	ENSBTAG00000025788
bta-let-7a-5p	MRPS21	ENSBTAG00000024378
bta-let-7a-5p	TMEM135	ENSBTAG00000005482
bta-let-7a-5p	DLST	ENSBTAG00000006463
bta-let-7a-5p	DLST	ENSBTAG00000006463
bta-let-7a-5p	MXD1	ENSBTAG00000001042
bta-let-7a-5p	MXD1	ENSBTAG00000001042
bta-let-7a-5p	TP53	ENSBTAG00000001069
bta-let-7a-5p	MRPL15	ENSBTAG00000001174
bta-let-7a-5p	NFS1	ENSBTAG00000006962
bta-let-7a-5p	TIMM44	ENSBTAG00000015567
bta-let-7a-5p	TIMM44	ENSBTAG00000015567
bta-let-7a-5p	PGRMC1	ENSBTAG00000019552
bta-let-7a-5p	PGRMC1	ENSBTAG00000019552
bta-let-7a-5p	PC	ENSBTAG00000019700
bta-let-7a-5p	GCAT	ENSBTAG00000008434
bta-let-7b	FBXO7	ENSBTAG00000020634
bta-let-7b	FEN1	ENSBTAG00000000064
bta-let-7b	MRS2	ENSBTAG00000004979
bta-let-7b	FKBP10	ENSBTAG00000011454
bta-let-7b	MRPL53	ENSBTAG00000016599
bta-let-7b	RANBP2	ENSBTAG00000000152
bta-let-7b	CAVIN1	ENSBTAG00000039684
bta-let-7b	DCAF8	ENSBTAG00000005796
bta-let-7b	SLC25A24	ENSBTAG00000003752
bta-let-7b	BCL2L1	ENSBTAG00000006526
bta-let-7b	BCL2L1	ENSBTAG00000006526
bta-let-7b	PACS2	ENSBTAG00000046346
bta-let-7b	PACS2	ENSBTAG00000046346
bta-let-7b	PNKD	ENSBTAG00000003936
bta-let-7b	MIEF1	ENSBTAG00000017439
bta-let-7b	RDH13	ENSBTAG00000030393
bta-let-7b	MPV17L2	ENSBTAG00000025788
bta-let-7b	MPV17L2	ENSBTAG00000025788
bta-let-7b	MRPS21	ENSBTAG00000024378
bta-let-7b	TMEM135	ENSBTAG00000005482
bta-let-7b	DLST	ENSBTAG00000006463
bta-let-7b	DLST	ENSBTAG00000006463
bta-let-7b	MXD1	ENSBTAG00000001042
bta-let-7b	MXD1	ENSBTAG00000001042
bta-let-7b	TP53	ENSBTAG00000001069
bta-let-7b	MRPL15	ENSBTAG00000001174
bta-let-7b	NFS1	ENSBTAG00000006962
bta-let-7b	TIMM44	ENSBTAG00000015567
bta-let-7b	TIMM44	ENSBTAG00000015567
bta-let-7b	PGRMC1	ENSBTAG00000019552
bta-let-7b	PGRMC1	ENSBTAG00000019552
bta-let-7b	PC	ENSBTAG00000019700
bta-let-7b	GCAT	ENSBTAG00000008434
bta-let-7d	FBXO7	ENSBTAG00000020634
bta-let-7d	FEN1	ENSBTAG00000000064
bta-let-7d	MRS2	ENSBTAG00000004979
bta-let-7d	FKBP10	ENSBTAG00000011454
bta-let-7d	MRPL53	ENSBTAG00000016599
bta-let-7d	RANBP2	ENSBTAG00000000152
bta-let-7d	CAVIN1	ENSBTAG00000039684
bta-let-7d	DCAF8	ENSBTAG00000005796
bta-let-7d	SLC25A24	ENSBTAG00000003752
bta-let-7d	BCL2L1	ENSBTAG00000006526
bta-let-7d	BCL2L1	ENSBTAG00000006526
bta-let-7d	PACS2	ENSBTAG00000046346
bta-let-7d	PACS2	ENSBTAG00000046346
bta-let-7d	PNKD	ENSBTAG00000003936
bta-let-7d	MIEF1	ENSBTAG00000017439
bta-let-7d	RDH13	ENSBTAG00000030393
bta-let-7d	MPV17L2	ENSBTAG00000025788
bta-let-7d	MPV17L2	ENSBTAG00000025788
bta-let-7d	MRPS21	ENSBTAG00000024378
bta-let-7d	TMEM135	ENSBTAG00000005482
bta-let-7d	DLST	ENSBTAG00000006463
bta-let-7d	DLST	ENSBTAG00000006463
bta-let-7d	MXD1	ENSBTAG00000001042
bta-let-7d	MXD1	ENSBTAG00000001042
bta-let-7d	TP53	ENSBTAG00000001069
bta-let-7d	MRPL15	ENSBTAG00000001174
bta-let-7d	NFS1	ENSBTAG00000006962
bta-let-7d	TIMM44	ENSBTAG00000015567
bta-let-7d	TIMM44	ENSBTAG00000015567
bta-let-7d	PGRMC1	ENSBTAG00000019552
bta-let-7d	PGRMC1	ENSBTAG00000019552
bta-let-7d	PC	ENSBTAG00000019700
bta-let-7d	GCAT	ENSBTAG00000008434
bta-let-7e	FBXO7	ENSBTAG00000020634
bta-let-7e	FEN1	ENSBTAG00000000064
bta-let-7e	MRS2	ENSBTAG00000004979
bta-let-7e	FKBP10	ENSBTAG00000011454
bta-let-7e	MRPL53	ENSBTAG00000016599
bta-let-7e	RANBP2	ENSBTAG00000000152
bta-let-7e	CAVIN1	ENSBTAG00000039684
bta-let-7e	DCAF8	ENSBTAG00000005796
bta-let-7e	SLC25A24	ENSBTAG00000003752
bta-let-7e	BCL2L1	ENSBTAG00000006526
bta-let-7e	BCL2L1	ENSBTAG00000006526
bta-let-7e	PACS2	ENSBTAG00000046346
bta-let-7e	PACS2	ENSBTAG00000046346
bta-let-7e	PNKD	ENSBTAG00000003936
bta-let-7e	MIEF1	ENSBTAG00000017439
bta-let-7e	RDH13	ENSBTAG00000030393
bta-let-7e	MPV17L2	ENSBTAG00000025788
bta-let-7e	MPV17L2	ENSBTAG00000025788
bta-let-7e	MRPS21	ENSBTAG00000024378
bta-let-7e	TMEM135	ENSBTAG00000005482
bta-let-7e	DLST	ENSBTAG00000006463
bta-let-7e	DLST	ENSBTAG00000006463
bta-let-7e	MXD1	ENSBTAG00000001042
bta-let-7e	MXD1	ENSBTAG00000001042
bta-let-7e	TP53	ENSBTAG00000001069
bta-let-7e	MRPL15	ENSBTAG00000001174
bta-let-7e	NFS1	ENSBTAG00000006962
bta-let-7e	TIMM44	ENSBTAG00000015567
bta-let-7e	TIMM44	ENSBTAG00000015567
bta-let-7e	PGRMC1	ENSBTAG00000019552
bta-let-7e	PGRMC1	ENSBTAG00000019552
bta-let-7e	PC	ENSBTAG00000019700
bta-let-7e	GCAT	ENSBTAG00000008434
bta-let-7g	FBXO7	ENSBTAG00000020634
bta-let-7g	FEN1	ENSBTAG00000000064
bta-let-7g	MRS2	ENSBTAG00000004979
bta-let-7g	FKBP10	ENSBTAG00000011454
bta-let-7g	MRPL53	ENSBTAG00000016599
bta-let-7g	RANBP2	ENSBTAG00000000152
bta-let-7g	CAVIN1	ENSBTAG00000039684
bta-let-7g	DCAF8	ENSBTAG00000005796
bta-let-7g	SLC25A24	ENSBTAG00000003752
bta-let-7g	BCL2L1	ENSBTAG00000006526
bta-let-7g	BCL2L1	ENSBTAG00000006526
bta-let-7g	PACS2	ENSBTAG00000046346
bta-let-7g	PACS2	ENSBTAG00000046346
bta-let-7g	PNKD	ENSBTAG00000003936
bta-let-7g	MIEF1	ENSBTAG00000017439
bta-let-7g	RDH13	ENSBTAG00000030393
bta-let-7g	MPV17L2	ENSBTAG00000025788
bta-let-7g	MPV17L2	ENSBTAG00000025788
bta-let-7g	MRPS21	ENSBTAG00000024378
bta-let-7g	TMEM135	ENSBTAG00000005482
bta-let-7g	DLST	ENSBTAG00000006463
bta-let-7g	DLST	ENSBTAG00000006463
bta-let-7g	MXD1	ENSBTAG00000001042
bta-let-7g	MXD1	ENSBTAG00000001042
bta-let-7g	TP53	ENSBTAG00000001069
bta-let-7g	MRPL15	ENSBTAG00000001174
bta-let-7g	NFS1	ENSBTAG00000006962
bta-let-7g	TIMM44	ENSBTAG00000015567
bta-let-7g	TIMM44	ENSBTAG00000015567
bta-let-7g	PGRMC1	ENSBTAG00000019552
bta-let-7g	PGRMC1	ENSBTAG00000019552
bta-let-7g	PC	ENSBTAG00000019700
bta-let-7g	GCAT	ENSBTAG00000008434
bta-miR-10162-5p	ZDHHC8	ENSBTAG00000006657
bta-miR-10162-5p	ZMIZ2	ENSBTAG00000011997
bta-miR-10162-5p	ZMIZ2	ENSBTAG00000011997
bta-miR-10162-5p	CHCHD4	ENSBTAG00000015529
bta-miR-10162-5p	HSPA4	ENSBTAG00000015683
bta-miR-10162-5p	TGM2	ENSBTAG00000016208
bta-miR-10162-5p	TGM2	ENSBTAG00000016208
bta-miR-10162-5p	USP30	ENSBTAG00000019845
bta-miR-10162-5p	AKAP1	ENSBTAG00000025320
bta-miR-10162-5p	ACSL1	ENSBTAG00000004344
bta-miR-10162-5p	ACSL1	ENSBTAG00000004344
bta-miR-10162-5p	ACSL1	ENSBTAG00000004344
bta-miR-10162-5p	ACSL1	ENSBTAG00000004344
bta-miR-10162-5p	PCCB	ENSBTAG00000015221
bta-miR-10162-5p	NRDC	ENSBTAG00000021174
bta-miR-10162-5p	NAPG	ENSBTAG00000005158
bta-miR-10162-5p	NAPG	ENSBTAG00000005158
bta-miR-10162-5p	MAPK1	ENSBTAG00000010312
bta-miR-10162-5p	FKBP10	ENSBTAG00000011454
bta-miR-10162-5p	SCO1	ENSBTAG00000021780
bta-miR-10162-5p	PDHA1	ENSBTAG00000019852
bta-miR-10162-5p	MMUT	ENSBTAG00000014272
bta-miR-10162-5p	CYB5B	ENSBTAG00000002412
bta-miR-10162-5p	DCAF8	ENSBTAG00000005796
bta-miR-10162-5p	CAPN1	ENSBTAG00000010230
bta-miR-10162-5p	CCAR2	ENSBTAG00000005469
bta-miR-10162-5p	RAB11FIP5	ENSBTAG00000006162
bta-miR-10162-5p	RAB11FIP5	ENSBTAG00000006162
bta-miR-10162-5p	BCL2L1	ENSBTAG00000006526
bta-miR-10162-5p	BCL2L1	ENSBTAG00000006526
bta-miR-10162-5p	NLRX1	ENSBTAG00000040569
bta-miR-10162-5p	AK3	ENSBTAG00000017147
bta-miR-10162-5p	ACACB	ENSBTAG00000022058
bta-miR-10162-5p	HK1	ENSBTAG00000012380
bta-miR-10162-5p	HK1	ENSBTAG00000012380
bta-miR-10162-5p	PACS2	ENSBTAG00000046346
bta-miR-10162-5p	PACS2	ENSBTAG00000046346
bta-miR-10162-5p	MRPL54	ENSBTAG00000008396
bta-miR-10162-5p	PRR14L	ENSBTAG00000009006
bta-miR-10162-5p	MIEF1	ENSBTAG00000017439
bta-miR-10162-5p	RDH13	ENSBTAG00000030393
bta-miR-10162-5p	MRPL12	ENSBTAG00000000417
bta-miR-10162-5p	FOXK2	ENSBTAG00000003687
bta-miR-10162-5p	IVD	ENSBTAG00000004409
bta-miR-10162-5p	GOT2	ENSBTAG00000007172
bta-miR-10162-5p	FKBP4	ENSBTAG00000007605
bta-miR-10162-5p	ILF3	ENSBTAG00000040076
bta-miR-10162-5p	MPV17	ENSBTAG00000018269
bta-miR-10162-5p	MPV17	ENSBTAG00000018269
bta-miR-10162-5p	MPV17	ENSBTAG00000018269
bta-miR-10162-5p	MRPS21	ENSBTAG00000024378
bta-miR-10162-5p	POLG	ENSBTAG00000009098
bta-miR-10162-5p	TMEM135	ENSBTAG00000005482
bta-miR-10162-5p	MRPS17	ENSBTAG00000007934
bta-miR-10162-5p	MICU1	ENSBTAG00000005807
bta-miR-10162-5p	MICU1	ENSBTAG00000005807
bta-miR-10162-5p	DLST	ENSBTAG00000006463
bta-miR-10162-5p	DLST	ENSBTAG00000006463
bta-miR-10162-5p	ME1	ENSBTAG00000005681
bta-miR-10162-5p	TIMM44	ENSBTAG00000015567
bta-miR-10162-5p	TIMM44	ENSBTAG00000015567
bta-miR-10162-5p	PC	ENSBTAG00000019700
bta-miR-10162-5p	PC	ENSBTAG00000019700
bta-miR-10162-5p	PC	ENSBTAG00000019700
bta-miR-10162-5p	PC	ENSBTAG00000019700
bta-miR-10162-5p	PC	ENSBTAG00000019700
bta-miR-10162-5p	PC	ENSBTAG00000019700
bta-miR-10162-5p	MRPL11	ENSBTAG00000053687
bta-miR-10162-5p	TNRC18	ENSBTAG00000037400
bta-miR-10162-5p	TNRC18	ENSBTAG00000037400
bta-miR-10162-5p	TNRC18	ENSBTAG00000037400
bta-miR-10162-5p	TNRC18	ENSBTAG00000037400
bta-miR-10162-5p	TNRC18	ENSBTAG00000037400
bta-miR-10162-5p	TNRC18	ENSBTAG00000037400
bta-miR-10162-5p	TNRC18	ENSBTAG00000037400
bta-miR-10162-5p	PINK1	ENSBTAG00000006084
bta-miR-10162-5p	MFN2	ENSBTAG00000005314
bta-miR-10162-5p	MFN2	ENSBTAG00000005314
bta-miR-10162-5p	ALDH18A1	ENSBTAG00000011832
bta-miR-10162-5p	CCDC51	ENSBTAG00000013413
bta-miR-10162-5p	CCDC51	ENSBTAG00000013413
bta-miR-10162-5p	MRPL4	ENSBTAG00000001419
bta-miR-10162-5p	IDH3B	ENSBTAG00000018813
bta-miR-10162-5p	IDH3B	ENSBTAG00000018813
bta-miR-10162-5p	GRPEL1	ENSBTAG00000010181
bta-miR-10162-5p	ABCB8	ENSBTAG00000007759
bta-miR-10162-5p	VSIG10L	ENSBTAG00000020447
bta-miR-10162-5p	MTHFD2	ENSBTAG00000004881
bta-miR-10162-5p	ARL2BP	ENSBTAG00000004844
bta-miR-10162-5p	FIS1	ENSBTAG00000007900
bta-miR-10162-5p	JTB	ENSBTAG00000014694
bta-miR-10162-5p	COX4I1	ENSBTAG00000016079
bta-miR-10162-5p	COX4I1	ENSBTAG00000016079
bta-miR-10162-5p	ABHD4	ENSBTAG00000016658
bta-miR-10162-5p	ATP5PD	ENSBTAG00000021227
bta-miR-10162-5p	ATP5PD	ENSBTAG00000021227
bta-miR-10162-5p	MICU2	ENSBTAG00000015943
bta-miR-10162-5p	GSK3A	ENSBTAG00000020756
bta-miR-106a	ZDHHC8	ENSBTAG00000006657
bta-miR-106a	SLC25A44	ENSBTAG00000009431
bta-miR-106a	MRPL51	ENSBTAG00000014729
bta-miR-106a	MTHFS	ENSBTAG00000020023
bta-miR-106a	ENSBTAG00000055145	ENSBTAG00000055145
bta-miR-106a	PDZD8	ENSBTAG00000011401
bta-miR-106a	VDAC1	ENSBTAG00000013113
bta-miR-106a	VDAC1	ENSBTAG00000013113
bta-miR-106a	SLC25A51	ENSBTAG00000014936
bta-miR-106a	MCL1	ENSBTAG00000015154
bta-miR-106a	SLC25A36	ENSBTAG00000015310
bta-miR-106a	SLC25A36	ENSBTAG00000015310
bta-miR-106a	MUL1	ENSBTAG00000020850
bta-miR-106a	PDHA1	ENSBTAG00000019852
bta-miR-106a	ALDH6A1	ENSBTAG00000018469
bta-miR-106a	RAB11FIP5	ENSBTAG00000006162
bta-miR-106a	RAB11FIP5	ENSBTAG00000006162
bta-miR-106a	AK3	ENSBTAG00000017147
bta-miR-106a	PACS2	ENSBTAG00000046346
bta-miR-106a	PACS2	ENSBTAG00000046346
bta-miR-106a	OPA1	ENSBTAG00000019514
bta-miR-106a	COX7A2L	ENSBTAG00000000705
bta-miR-106a	ELK3	ENSBTAG00000001509
bta-miR-106a	RAB29	ENSBTAG00000003232
bta-miR-106a	MTARC2	ENSBTAG00000016277
bta-miR-106a	PGAM5	ENSBTAG00000007513
bta-miR-106a	TRIT1	ENSBTAG00000013832
bta-miR-106a	SLC25A38	ENSBTAG00000022721
bta-miR-106a	TRNT1	ENSBTAG00000019534
bta-miR-106a	RAB5IF	ENSBTAG00000021805
bta-miR-106a	ALDH5A1	ENSBTAG00000021902
bta-miR-106a	RHOT1	ENSBTAG00000010001
bta-miR-106a	TMBIM6	ENSBTAG00000018588
bta-miR-106a	ARID4B	ENSBTAG00000000222
bta-miR-106a	ARID4B	ENSBTAG00000000222
bta-miR-10a	BAK1	ENSBTAG00000000428
bta-miR-10a	PMPCA	ENSBTAG00000001353
bta-miR-10a	ZDHHC8	ENSBTAG00000006657
bta-miR-10a	MRPL51	ENSBTAG00000014729
bta-miR-10a	AKAP1	ENSBTAG00000025320
bta-miR-10a	FBXW8	ENSBTAG00000036183
bta-miR-10a	MRS2	ENSBTAG00000004979
bta-miR-10a	NAPG	ENSBTAG00000005158
bta-miR-10a	NAPG	ENSBTAG00000005158
bta-miR-10a	DHTKD1	ENSBTAG00000000291
bta-miR-10a	ACO2	ENSBTAG00000006429
bta-miR-10a	BCL2L1	ENSBTAG00000006526
bta-miR-10a	BCL2L1	ENSBTAG00000006526
bta-miR-10a	QRSL1	ENSBTAG00000017557
bta-miR-10a	PYCR1	ENSBTAG00000000042
bta-miR-10a	PYCR1	ENSBTAG00000000042
bta-miR-10a	PYCR1	ENSBTAG00000000042
bta-miR-10a	YKT6	ENSBTAG00000000274
bta-miR-10a	IMMT	ENSBTAG00000003307
bta-miR-10a	IMMT	ENSBTAG00000003307
bta-miR-10a	IMMT	ENSBTAG00000003307
bta-miR-10a	PNKD	ENSBTAG00000003936
bta-miR-10a	MRPL49	ENSBTAG00000005075
bta-miR-10a	PTCD3	ENSBTAG00000006482
bta-miR-10a	MRPL54	ENSBTAG00000008396
bta-miR-10a	PRR14L	ENSBTAG00000009006
bta-miR-10a	DNAJA3	ENSBTAG00000010013
bta-miR-10a	DNAJA3	ENSBTAG00000010013
bta-miR-10a	NUDT9	ENSBTAG00000011354
bta-miR-10a	ANXA6	ENSBTAG00000014809
bta-miR-10a	ANXA6	ENSBTAG00000014809
bta-miR-10a	ANXA6	ENSBTAG00000014809
bta-miR-10a	MIEF1	ENSBTAG00000017439
bta-miR-10a	SLC25A37	ENSBTAG00000019099
bta-miR-10a	RDH13	ENSBTAG00000030393
bta-miR-10a	MPV17L2	ENSBTAG00000025788
bta-miR-10a	MPV17L2	ENSBTAG00000025788
bta-miR-10a	GFM1	ENSBTAG00000027795
bta-miR-10a	P4HA1	ENSBTAG00000032996
bta-miR-10a	P4HA1	ENSBTAG00000032996
bta-miR-10a	MRPL12	ENSBTAG00000000417
bta-miR-10a	ATF2	ENSBTAG00000002295
bta-miR-10a	FOXK2	ENSBTAG00000003687
bta-miR-10a	PRKACA	ENSBTAG00000006642
bta-miR-10b	BAK1	ENSBTAG00000000428
bta-miR-10b	PMPCA	ENSBTAG00000001353
bta-miR-10b	ZDHHC8	ENSBTAG00000006657
bta-miR-10b	MRPL51	ENSBTAG00000014729
bta-miR-10b	AKAP1	ENSBTAG00000025320
bta-miR-10b	FBXW8	ENSBTAG00000036183
bta-miR-10b	MRS2	ENSBTAG00000004979
bta-miR-10b	NAPG	ENSBTAG00000005158
bta-miR-10b	NAPG	ENSBTAG00000005158
bta-miR-10b	DHTKD1	ENSBTAG00000000291
bta-miR-10b	ACO2	ENSBTAG00000006429
bta-miR-10b	BCL2L1	ENSBTAG00000006526
bta-miR-10b	BCL2L1	ENSBTAG00000006526
bta-miR-10b	QRSL1	ENSBTAG00000017557
bta-miR-10b	PYCR1	ENSBTAG00000000042
bta-miR-10b	PYCR1	ENSBTAG00000000042
bta-miR-10b	PYCR1	ENSBTAG00000000042
bta-miR-10b	YKT6	ENSBTAG00000000274
bta-miR-10b	IMMT	ENSBTAG00000003307
bta-miR-10b	IMMT	ENSBTAG00000003307
bta-miR-10b	IMMT	ENSBTAG00000003307
bta-miR-10b	PNKD	ENSBTAG00000003936
bta-miR-10b	MRPL49	ENSBTAG00000005075
bta-miR-10b	PTCD3	ENSBTAG00000006482
bta-miR-10b	MRPL54	ENSBTAG00000008396
bta-miR-10b	PRR14L	ENSBTAG00000009006
bta-miR-10b	DNAJA3	ENSBTAG00000010013
bta-miR-10b	DNAJA3	ENSBTAG00000010013
bta-miR-10b	NUDT9	ENSBTAG00000011354
bta-miR-10b	ANXA6	ENSBTAG00000014809
bta-miR-10b	ANXA6	ENSBTAG00000014809
bta-miR-10b	ANXA6	ENSBTAG00000014809
bta-miR-10b	MIEF1	ENSBTAG00000017439
bta-miR-10b	SLC25A37	ENSBTAG00000019099
bta-miR-10b	RDH13	ENSBTAG00000030393
bta-miR-10b	MPV17L2	ENSBTAG00000025788
bta-miR-10b	MPV17L2	ENSBTAG00000025788
bta-miR-10b	GFM1	ENSBTAG00000027795
bta-miR-10b	P4HA1	ENSBTAG00000032996
bta-miR-10b	P4HA1	ENSBTAG00000032996
bta-miR-10b	MRPL12	ENSBTAG00000000417
bta-miR-10b	ATF2	ENSBTAG00000002295
bta-miR-10b	FOXK2	ENSBTAG00000003687
bta-miR-10b	PRKACA	ENSBTAG00000006642
bta-miR-11991	AKAP10	ENSBTAG00000003439
bta-miR-11991	ACSL1	ENSBTAG00000004344
bta-miR-11991	ACSL1	ENSBTAG00000004344
bta-miR-11991	ACSL1	ENSBTAG00000004344
bta-miR-11991	ACSL1	ENSBTAG00000004344
bta-miR-11991	NAPG	ENSBTAG00000005158
bta-miR-11991	NAPG	ENSBTAG00000005158
bta-miR-11991	STX17	ENSBTAG00000008016
bta-miR-11991	SLC25A51	ENSBTAG00000014936
bta-miR-11991	SCO1	ENSBTAG00000021780
bta-miR-11991	ACO1	ENSBTAG00000000555
bta-miR-11991	CCAR2	ENSBTAG00000005469
bta-miR-11991	MTFR1	ENSBTAG00000008629
bta-miR-11991	STOM	ENSBTAG00000038375
bta-miR-11991	RAB29	ENSBTAG00000003232
bta-miR-11991	TMBIM6	ENSBTAG00000018588
bta-miR-11991	ARID4B	ENSBTAG00000000222
bta-miR-11991	ARID4B	ENSBTAG00000000222
bta-miR-11991	MPV17L2	ENSBTAG00000025788
bta-miR-11991	MPV17L2	ENSBTAG00000025788
bta-miR-11991	CREBZF	ENSBTAG00000000455
bta-miR-11991	IVD	ENSBTAG00000004409
bta-miR-11991	FLVCR1	ENSBTAG00000015974
bta-miR-11991	FLVCR1	ENSBTAG00000015974
bta-miR-11991	FAM210B	ENSBTAG00000013007
bta-miR-11991	FUNDC2	ENSBTAG00000016977
bta-miR-11991	ATAD3A	ENSBTAG00000002219
bta-miR-11991	ALDH7A1	ENSBTAG00000009646
bta-miR-11991	MTX2	ENSBTAG00000006693
bta-miR-11991	COX5B	ENSBTAG00000053107
bta-miR-11991	TSPO	ENSBTAG00000018073
bta-miR-11991	TSPO	ENSBTAG00000018073
bta-miR-11991	SIRT2	ENSBTAG00000001776
bta-miR-11991	SIRT2	ENSBTAG00000001776
bta-miR-11991	ECHDC3	ENSBTAG00000012377
bta-miR-11991	PUS1	ENSBTAG00000012990
bta-miR-11991	PUS1	ENSBTAG00000012990
bta-miR-11991	PARL	ENSBTAG00000014460
bta-miR-11991	MRPL3	ENSBTAG00000030942
bta-miR-11991	ECHS1	ENSBTAG00000017710
bta-miR-1291	ZDHHC8	ENSBTAG00000006657
bta-miR-1291	ATG4D	ENSBTAG00000010727
bta-miR-1291	ATG4D	ENSBTAG00000010727
bta-miR-1291	ZMIZ2	ENSBTAG00000011997
bta-miR-1291	ZMIZ2	ENSBTAG00000011997
bta-miR-1291	TGM2	ENSBTAG00000016208
bta-miR-1291	KLC2	ENSBTAG00000019334
bta-miR-1291	AKAP10	ENSBTAG00000003439
bta-miR-1291	AKAP10	ENSBTAG00000003439
bta-miR-1291	CPT1A	ENSBTAG00000021999
bta-miR-1291	CPT1A	ENSBTAG00000021999
bta-miR-1291	MRPL10	ENSBTAG00000001832
bta-miR-1291	MAPK1	ENSBTAG00000010312
bta-miR-1291	SLC25A51	ENSBTAG00000014936
bta-miR-1291	MUL1	ENSBTAG00000020850
bta-miR-1291	AK3	ENSBTAG00000017147
bta-miR-1291	PITRM1	ENSBTAG00000002685
bta-miR-1291	PACS2	ENSBTAG00000046346
bta-miR-1291	PACS2	ENSBTAG00000046346
bta-miR-1291	PNKD	ENSBTAG00000003936
bta-miR-1291	MRPL54	ENSBTAG00000008396
bta-miR-1291	DNAJA3	ENSBTAG00000010013
bta-miR-1291	DNAJA3	ENSBTAG00000010013
bta-miR-1291	MIEF1	ENSBTAG00000017439
bta-miR-1291	GRAMD4	ENSBTAG00000021803
bta-miR-1291	GRAMD4	ENSBTAG00000021803
bta-miR-1291	GRAMD4	ENSBTAG00000021803
bta-miR-1291	GRAMD4	ENSBTAG00000021803
bta-miR-1291	GRAMD4	ENSBTAG00000021803
bta-miR-1291	GRAMD4	ENSBTAG00000021803
bta-miR-1291	DELE1	ENSBTAG00000008435
bta-miR-1291	ATPSCKMT	ENSBTAG00000017885
bta-miR-1291	DIABLO	ENSBTAG00000004199
bta-miR-1291	MFN2	ENSBTAG00000005314
bta-miR-1291	MFN2	ENSBTAG00000005314
bta-miR-1291	MCAT	ENSBTAG00000002413
bta-miR-1291	HS1BP3	ENSBTAG00000015490
bta-miR-1291	HS1BP3	ENSBTAG00000015490
bta-miR-1291	MRPS7	ENSBTAG00000016133
bta-miR-1291	LIG3	ENSBTAG00000018689
bta-miR-1291	TXN2	ENSBTAG00000000014
bta-miR-1291	BCAP31	ENSBTAG00000020547
bta-miR-1291	RCC1L	ENSBTAG00000011753
bta-miR-1291	OGDH	ENSBTAG00000006029
bta-miR-1291	OGDH	ENSBTAG00000006029
bta-miR-1291	OGDH	ENSBTAG00000006029
bta-miR-1291	OGDH	ENSBTAG00000006029
bta-miR-1291	OGDH	ENSBTAG00000006029
bta-miR-1291	OGDH	ENSBTAG00000006029
bta-miR-1291	OGDH	ENSBTAG00000006029
bta-miR-1291	OGDH	ENSBTAG00000006029
bta-miR-1291	OGDH	ENSBTAG00000006029
bta-miR-1291	OGDH	ENSBTAG00000006029
bta-miR-1291	NDUFA7	ENSBTAG00000052280
bta-miR-1291	MYO19	ENSBTAG00000012675
bta-miR-1291	STMP1	ENSBTAG00000051809
bta-miR-1291	SELENOO	ENSBTAG00000000647
bta-miR-1291	SELENOO	ENSBTAG00000000647
bta-miR-1291	COX14	ENSBTAG00000000808
bta-miR-1291	SIRT2	ENSBTAG00000001776
bta-miR-1291	SIRT2	ENSBTAG00000001776
bta-miR-1291	DMAC2	ENSBTAG00000009449
bta-miR-1291	DMAC2	ENSBTAG00000009449
bta-miR-1291	NDUFS6	ENSBTAG00000009914
bta-miR-1291	NDUFS6	ENSBTAG00000009914
bta-miR-1291	SAMM50	ENSBTAG00000045957
bta-miR-1291	VASN	ENSBTAG00000046339
bta-miR-1296	PI4K2A	ENSBTAG00000002010
bta-miR-1296	ZMIZ2	ENSBTAG00000011997
bta-miR-1296	ZMIZ2	ENSBTAG00000011997
bta-miR-1296	AKAP10	ENSBTAG00000003439
bta-miR-1296	NRDC	ENSBTAG00000021174
bta-miR-1296	DCAF8	ENSBTAG00000005796
bta-miR-1296	CIAPIN1	ENSBTAG00000001854
bta-miR-1296	ACACB	ENSBTAG00000022058
bta-miR-1296	RHOT1	ENSBTAG00000010001
bta-miR-1296	GFM1	ENSBTAG00000027795
bta-miR-1296	MRPL4	ENSBTAG00000001419
bta-miR-143	NDUFAF6	ENSBTAG00000007570
bta-miR-143	SLC25A44	ENSBTAG00000009431
bta-miR-143	CHCHD4	ENSBTAG00000015529
bta-miR-143	TGM2	ENSBTAG00000016208
bta-miR-143	TGM2	ENSBTAG00000016208
bta-miR-143	FBXO7	ENSBTAG00000020634
bta-miR-143	AKAP10	ENSBTAG00000003439
bta-miR-143	CPT1A	ENSBTAG00000021999
bta-miR-143	CPT1A	ENSBTAG00000021999
bta-miR-143	PCCB	ENSBTAG00000015221
bta-miR-143	MRPL10	ENSBTAG00000001832
bta-miR-143	AK2	ENSBTAG00000017605
bta-miR-143	MUL1	ENSBTAG00000020850
bta-miR-143	SCO1	ENSBTAG00000021780
bta-miR-143	NDUFS1	ENSBTAG00000021976
bta-miR-143	MCUR1	ENSBTAG00000001475
bta-miR-143	CYB5B	ENSBTAG00000002412
bta-miR-143	DCAF8	ENSBTAG00000005796
bta-miR-143	CIAPIN1	ENSBTAG00000001854
bta-miR-143	NLRX1	ENSBTAG00000040569
bta-miR-143	BCL2L13	ENSBTAG00000013956
bta-miR-143	ACACB	ENSBTAG00000022058
bta-miR-143	OPA1	ENSBTAG00000019514
bta-miR-143	COX7A2L	ENSBTAG00000000705
bta-miR-143	RAB29	ENSBTAG00000003232
bta-miR-143	PGAM5	ENSBTAG00000007513
bta-miR-143	SLC25A38	ENSBTAG00000022721
bta-miR-143	PYCR1	ENSBTAG00000000042
bta-miR-143	PYCR1	ENSBTAG00000000042
bta-miR-143	PYCR1	ENSBTAG00000000042
bta-miR-143	PNKD	ENSBTAG00000003936
bta-miR-143	MIEF1	ENSBTAG00000017439
bta-miR-143	CREBZF	ENSBTAG00000000455
bta-miR-143	GOT2	ENSBTAG00000007172
bta-miR-143	CBR4	ENSBTAG00000022013
bta-miR-143	WDR81	ENSBTAG00000011491
bta-miR-143	PC	ENSBTAG00000019700
bta-miR-143	PC	ENSBTAG00000019700
bta-miR-143	PC	ENSBTAG00000019700
bta-miR-143	PC	ENSBTAG00000019700
bta-miR-143	PC	ENSBTAG00000019700
bta-miR-143	PC	ENSBTAG00000019700
bta-miR-143	CA5B	ENSBTAG00000020418
bta-miR-143	PRKCA	ENSBTAG00000001061
bta-miR-143	GABARAPL1	ENSBTAG00000011765
bta-miR-143	CDK1	ENSBTAG00000010109
bta-miR-143	COQ10A	ENSBTAG00000004367
bta-miR-143	GPD2	ENSBTAG00000009770
bta-miR-143	GPD2	ENSBTAG00000009770
bta-miR-143	RCC1L	ENSBTAG00000011753
bta-miR-143	ALDH18A1	ENSBTAG00000011832
bta-miR-143	HAX1	ENSBTAG00000013025
bta-miR-143	CCDC51	ENSBTAG00000013413
bta-miR-143	CCDC51	ENSBTAG00000013413
bta-miR-143	GARS1	ENSBTAG00000018972
bta-miR-143	NIPSNAP2	ENSBTAG00000031598
bta-miR-143	MTCH1	ENSBTAG00000033453
bta-miR-143	ALDH7A1	ENSBTAG00000009646
bta-miR-144	MRPL51	ENSBTAG00000014729
bta-miR-144	PCCB	ENSBTAG00000015221
bta-miR-144	RAD51	ENSBTAG00000002918
bta-miR-144	SLC25A36	ENSBTAG00000015310
bta-miR-144	SLC25A36	ENSBTAG00000015310
bta-miR-144	CPNE3	ENSBTAG00000015536
bta-miR-144	MRPL53	ENSBTAG00000016599
bta-miR-144	NR3C1	ENSBTAG00000019472
bta-miR-144	DHTKD1	ENSBTAG00000000291
bta-miR-144	DHTKD1	ENSBTAG00000000291
bta-miR-144	DHTKD1	ENSBTAG00000000291
bta-miR-144	DHTKD1	ENSBTAG00000000291
bta-miR-144	RAB11FIP5	ENSBTAG00000006162
bta-miR-144	RAB11FIP5	ENSBTAG00000006162
bta-miR-144	MIGA1	ENSBTAG00000031044
bta-miR-144	ALDH5A1	ENSBTAG00000021902
bta-miR-144	TMBIM6	ENSBTAG00000018588
bta-miR-144	ATF2	ENSBTAG00000002295
bta-miR-144	TMEM135	ENSBTAG00000005482
bta-miR-144	BECN1	ENSBTAG00000019914
bta-miR-144	BECN1	ENSBTAG00000019914
bta-miR-144	MRPL11	ENSBTAG00000053687
bta-miR-144	CA5B	ENSBTAG00000020418
bta-miR-144	PMPCB	ENSBTAG00000006876
bta-miR-144	MCU	ENSBTAG00000003876
bta-miR-144	MCU	ENSBTAG00000003876
bta-miR-144	MTX2	ENSBTAG00000006693
bta-miR-144	SPART	ENSBTAG00000008040
bta-miR-144	IDH2	ENSBTAG00000014093
bta-miR-144	PTCD2	ENSBTAG00000014675
bta-miR-144	C3H1orf43	ENSBTAG00000020026
bta-miR-144	C3H1orf43	ENSBTAG00000020026
bta-miR-144	C3H1orf43	ENSBTAG00000020026
bta-miR-144	NACC2	ENSBTAG00000020490
bta-miR-144	NACC2	ENSBTAG00000020490
bta-miR-144	NACC2	ENSBTAG00000020490
bta-miR-144	PPP1CC	ENSBTAG00000011198
bta-miR-144	COX5B	ENSBTAG00000053107
bta-miR-1468	MAPK1	ENSBTAG00000010312
bta-miR-1468	NUDT9	ENSBTAG00000011354
bta-miR-1468	FOXK2	ENSBTAG00000003687
bta-miR-1468	DCPS	ENSBTAG00000002879
bta-miR-1468	TIMM23	ENSBTAG00000011694
bta-miR-146b	FBXO7	ENSBTAG00000020634
bta-miR-146b	CNR1	ENSBTAG00000054523
bta-miR-146b	NAPG	ENSBTAG00000005158
bta-miR-146b	NAPG	ENSBTAG00000005158
bta-miR-146b	KANK2	ENSBTAG00000009568
bta-miR-146b	MAPK1	ENSBTAG00000010312
bta-miR-146b	MRPL53	ENSBTAG00000016599
bta-miR-146b	SCO1	ENSBTAG00000021780
bta-miR-146b	SCO1	ENSBTAG00000021780
bta-miR-146b	GHITM	ENSBTAG00000032829
bta-miR-146b	GHITM	ENSBTAG00000032829
bta-miR-146b	PDHA1	ENSBTAG00000019852
bta-miR-146b	NR3C1	ENSBTAG00000019472
bta-miR-146b	DHTKD1	ENSBTAG00000000291
bta-miR-146b	PACS2	ENSBTAG00000046346
bta-miR-146b	PACS2	ENSBTAG00000046346
bta-miR-146b	ENSBTAG00000050249	ENSBTAG00000050249
bta-miR-146b	RAB29	ENSBTAG00000003232
bta-miR-146b	MICU1	ENSBTAG00000005807
bta-miR-146b	MICU1	ENSBTAG00000005807
bta-miR-146b	DELE1	ENSBTAG00000008435
bta-miR-146b	TNRC18	ENSBTAG00000037400
bta-miR-146b	TNRC18	ENSBTAG00000037400
bta-miR-146b	TNRC18	ENSBTAG00000037400
bta-miR-146b	TNRC18	ENSBTAG00000037400
bta-miR-146b	TNRC18	ENSBTAG00000037400
bta-miR-146b	TNRC18	ENSBTAG00000037400
bta-miR-146b	TNRC18	ENSBTAG00000037400
bta-miR-146b	PINK1	ENSBTAG00000006084
bta-miR-146b	NDUFS4	ENSBTAG00000003728
bta-miR-146b	MCAT	ENSBTAG00000002413
bta-miR-146b	GPD2	ENSBTAG00000009770
bta-miR-146b	GPD2	ENSBTAG00000009770
bta-miR-146b	AIFM2	ENSBTAG00000001165
bta-miR-146b	AIFM2	ENSBTAG00000001165
bta-miR-146b	APEX1	ENSBTAG00000002745
bta-miR-146b	OGDH	ENSBTAG00000006029
bta-miR-146b	OGDH	ENSBTAG00000006029
bta-miR-146b	OGDH	ENSBTAG00000006029
bta-miR-146b	OGDH	ENSBTAG00000006029
bta-miR-146b	OGDH	ENSBTAG00000006029
bta-miR-146b	OGDH	ENSBTAG00000006029
bta-miR-146b	OGDH	ENSBTAG00000006029
bta-miR-146b	OGDH	ENSBTAG00000006029
bta-miR-146b	OGDH	ENSBTAG00000006029
bta-miR-146b	OGDH	ENSBTAG00000006029
bta-miR-148a	ATPAF1	ENSBTAG00000000094
bta-miR-148a	ATPAF1	ENSBTAG00000000094
bta-miR-148a	ATPAF1	ENSBTAG00000000094
bta-miR-148a	BAK1	ENSBTAG00000000428
bta-miR-148a	PARP1	ENSBTAG00000000837
bta-miR-148a	PMPCA	ENSBTAG00000001353
bta-miR-148a	PI4K2A	ENSBTAG00000002010
bta-miR-148a	NOL6	ENSBTAG00000003323
bta-miR-148a	ZDHHC8	ENSBTAG00000006657
bta-miR-148a	TMEM14C	ENSBTAG00000005808
bta-miR-148a	USP48	ENSBTAG00000006940
bta-miR-148a	USP48	ENSBTAG00000006940
bta-miR-148a	NDUFAF6	ENSBTAG00000007570
bta-miR-148a	SRC	ENSBTAG00000008938
bta-miR-148a	SLC25A44	ENSBTAG00000009431
bta-miR-148a	ATG4D	ENSBTAG00000010727
bta-miR-148a	ATG4D	ENSBTAG00000010727
bta-miR-148a	ZMIZ2	ENSBTAG00000011997
bta-miR-148a	ZMIZ2	ENSBTAG00000011997
bta-miR-148a	MAVS	ENSBTAG00000013545
bta-miR-148a	MRPL51	ENSBTAG00000014729
bta-miR-148a	TRAK2	ENSBTAG00000014933
bta-miR-148a	TRAK2	ENSBTAG00000014933
bta-miR-148a	TRAK2	ENSBTAG00000014933
bta-miR-148a	ALDH4A1	ENSBTAG00000030335
bta-miR-148a	ALDH4A1	ENSBTAG00000030335
bta-miR-148a	CHCHD4	ENSBTAG00000015529
bta-miR-148a	HSPA4	ENSBTAG00000015683
bta-miR-148a	TGM2	ENSBTAG00000016208
bta-miR-148a	TGM2	ENSBTAG00000016208
bta-miR-148a	SLC25A30	ENSBTAG00000016529
bta-miR-148a	ABCB10	ENSBTAG00000017053
bta-miR-148a	TUFM	ENSBTAG00000019216
bta-miR-148a	KLC2	ENSBTAG00000019334
bta-miR-148a	MTHFS	ENSBTAG00000020023
bta-miR-148a	FBXO7	ENSBTAG00000020634
bta-miR-148a	NDUFV3	ENSBTAG00000021491
bta-miR-148a	NDUFV3	ENSBTAG00000021491
bta-miR-148a	NDUFV3	ENSBTAG00000021491
bta-miR-148a	USP30	ENSBTAG00000019845
bta-miR-148a	OGT	ENSBTAG00000000902
bta-miR-148a	OGT	ENSBTAG00000000902
bta-miR-148a	AKAP1	ENSBTAG00000025320
bta-miR-148a	FBXW8	ENSBTAG00000036183
bta-miR-148a	ARMCX3	ENSBTAG00000037996
bta-miR-148a	AKAP10	ENSBTAG00000003439
bta-miR-148a	CLIC4	ENSBTAG00000009470
bta-miR-148a	CNR1	ENSBTAG00000054523
bta-miR-148a	FASTKD5	ENSBTAG00000051021
bta-miR-148a	CPT1A	ENSBTAG00000021999
bta-miR-148a	CPT1A	ENSBTAG00000021999
bta-miR-148a	NBR1	ENSBTAG00000001632
bta-miR-148a	NBR1	ENSBTAG00000001632
bta-miR-148a	NBR1	ENSBTAG00000001632
bta-miR-148a	NBR1	ENSBTAG00000001632
bta-miR-148a	NBR1	ENSBTAG00000001632
bta-miR-148a	NBR1	ENSBTAG00000001632
bta-miR-148a	NBR1	ENSBTAG00000001632
bta-miR-148a	ARAF	ENSBTAG00000005039
bta-miR-148a	ACSL1	ENSBTAG00000004344
bta-miR-148a	ACSL1	ENSBTAG00000004344
bta-miR-148a	ACSL1	ENSBTAG00000004344
bta-miR-148a	ACSL1	ENSBTAG00000004344
bta-miR-148a	PCCB	ENSBTAG00000015221
bta-miR-148a	NRDC	ENSBTAG00000021174
bta-miR-148a	HK2	ENSBTAG00000013108
bta-miR-152	ATPAF1	ENSBTAG00000000094
bta-miR-152	ATPAF1	ENSBTAG00000000094
bta-miR-152	ATPAF1	ENSBTAG00000000094
bta-miR-152	BAK1	ENSBTAG00000000428
bta-miR-152	PARP1	ENSBTAG00000000837
bta-miR-152	PMPCA	ENSBTAG00000001353
bta-miR-152	PI4K2A	ENSBTAG00000002010
bta-miR-152	NOL6	ENSBTAG00000003323
bta-miR-152	ZDHHC8	ENSBTAG00000006657
bta-miR-152	TMEM14C	ENSBTAG00000005808
bta-miR-152	USP48	ENSBTAG00000006940
bta-miR-152	USP48	ENSBTAG00000006940
bta-miR-152	NDUFAF6	ENSBTAG00000007570
bta-miR-152	SRC	ENSBTAG00000008938
bta-miR-152	SLC25A44	ENSBTAG00000009431
bta-miR-152	ATG4D	ENSBTAG00000010727
bta-miR-152	ATG4D	ENSBTAG00000010727
bta-miR-152	ZMIZ2	ENSBTAG00000011997
bta-miR-152	ZMIZ2	ENSBTAG00000011997
bta-miR-152	MAVS	ENSBTAG00000013545
bta-miR-152	MRPL51	ENSBTAG00000014729
bta-miR-152	TRAK2	ENSBTAG00000014933
bta-miR-152	TRAK2	ENSBTAG00000014933
bta-miR-152	TRAK2	ENSBTAG00000014933
bta-miR-152	ALDH4A1	ENSBTAG00000030335
bta-miR-152	ALDH4A1	ENSBTAG00000030335
bta-miR-152	CHCHD4	ENSBTAG00000015529
bta-miR-152	HSPA4	ENSBTAG00000015683
bta-miR-152	TGM2	ENSBTAG00000016208
bta-miR-152	TGM2	ENSBTAG00000016208
bta-miR-152	SLC25A30	ENSBTAG00000016529
bta-miR-152	ABCB10	ENSBTAG00000017053
bta-miR-152	TUFM	ENSBTAG00000019216
bta-miR-152	KLC2	ENSBTAG00000019334
bta-miR-152	MTHFS	ENSBTAG00000020023
bta-miR-152	FBXO7	ENSBTAG00000020634
bta-miR-152	NDUFV3	ENSBTAG00000021491
bta-miR-152	NDUFV3	ENSBTAG00000021491
bta-miR-152	NDUFV3	ENSBTAG00000021491
bta-miR-152	USP30	ENSBTAG00000019845
bta-miR-152	OGT	ENSBTAG00000000902
bta-miR-152	OGT	ENSBTAG00000000902
bta-miR-152	AKAP1	ENSBTAG00000025320
bta-miR-152	FBXW8	ENSBTAG00000036183
bta-miR-152	ARMCX3	ENSBTAG00000037996
bta-miR-152	AKAP10	ENSBTAG00000003439
bta-miR-152	CLIC4	ENSBTAG00000009470
bta-miR-152	CNR1	ENSBTAG00000054523
bta-miR-152	FASTKD5	ENSBTAG00000051021
bta-miR-152	CPT1A	ENSBTAG00000021999
bta-miR-152	CPT1A	ENSBTAG00000021999
bta-miR-152	NBR1	ENSBTAG00000001632
bta-miR-152	NBR1	ENSBTAG00000001632
bta-miR-152	NBR1	ENSBTAG00000001632
bta-miR-152	NBR1	ENSBTAG00000001632
bta-miR-152	NBR1	ENSBTAG00000001632
bta-miR-152	NBR1	ENSBTAG00000001632
bta-miR-152	NBR1	ENSBTAG00000001632
bta-miR-152	ARAF	ENSBTAG00000005039
bta-miR-152	ACSL1	ENSBTAG00000004344
bta-miR-152	ACSL1	ENSBTAG00000004344
bta-miR-152	ACSL1	ENSBTAG00000004344
bta-miR-152	ACSL1	ENSBTAG00000004344
bta-miR-152	PCCB	ENSBTAG00000015221
bta-miR-152	NRDC	ENSBTAG00000021174
bta-miR-152	HK2	ENSBTAG00000013108
bta-miR-181b	PI4K2A	ENSBTAG00000002010
bta-miR-181b	TRAK2	ENSBTAG00000014933
bta-miR-181b	TRAK2	ENSBTAG00000014933
bta-miR-181b	TRAK2	ENSBTAG00000014933
bta-miR-181b	CHCHD4	ENSBTAG00000015529
bta-miR-181b	FBXO7	ENSBTAG00000020634
bta-miR-181b	CNR1	ENSBTAG00000054523
bta-miR-181b	CPT1A	ENSBTAG00000021999
bta-miR-181b	CPT1A	ENSBTAG00000021999
bta-miR-181b	NBR1	ENSBTAG00000001632
bta-miR-181b	NBR1	ENSBTAG00000001632
bta-miR-181b	NBR1	ENSBTAG00000001632
bta-miR-181b	NBR1	ENSBTAG00000001632
bta-miR-181b	NBR1	ENSBTAG00000001632
bta-miR-181b	NBR1	ENSBTAG00000001632
bta-miR-181b	NBR1	ENSBTAG00000001632
bta-miR-181b	NCBP1	ENSBTAG00000009732
bta-miR-181b	MCL1	ENSBTAG00000015154
bta-miR-181b	CPNE3	ENSBTAG00000015536
bta-miR-181b	SDHD	ENSBTAG00000016266
bta-miR-181b	NDUFS1	ENSBTAG00000021976
bta-miR-181b	GHITM	ENSBTAG00000032829
bta-miR-181b	CAVIN1	ENSBTAG00000039684
bta-miR-181b	NR3C1	ENSBTAG00000019472
bta-miR-181b	DHTKD1	ENSBTAG00000000291
bta-miR-181b	DHTKD1	ENSBTAG00000000291
bta-miR-181b	DHTKD1	ENSBTAG00000000291
bta-miR-181b	DHTKD1	ENSBTAG00000000291
bta-miR-181b	ACO1	ENSBTAG00000000555
bta-miR-181b	SLC25A24	ENSBTAG00000003752
bta-miR-181b	RAB11FIP5	ENSBTAG00000006162
bta-miR-181b	RAB11FIP5	ENSBTAG00000006162
bta-miR-181b	AK3	ENSBTAG00000017147
bta-miR-181b	MIGA1	ENSBTAG00000031044
bta-miR-181b	MTARC2	ENSBTAG00000016277
bta-miR-181b	DNAJA3	ENSBTAG00000010013
bta-miR-181b	DNAJA3	ENSBTAG00000010013
bta-miR-181b	FOXK2	ENSBTAG00000003687
bta-miR-181b	DDIT4	ENSBTAG00000000163
bta-miR-181b	CREBZF	ENSBTAG00000000455
bta-miR-181b	PPP1R15A	ENSBTAG00000001294
bta-miR-181b	MTERF3	ENSBTAG00000001522
bta-miR-181b	RPS3	ENSBTAG00000005620
bta-miR-181b	MRPL43	ENSBTAG00000003294
bta-miR-181b	IVD	ENSBTAG00000004409
bta-miR-181b	MRPL13	ENSBTAG00000006767
bta-miR-181b	MRPL13	ENSBTAG00000006767
bta-miR-181b	AIFM1	ENSBTAG00000006838
bta-miR-181b	OAT	ENSBTAG00000006928
bta-miR-181b	GSR	ENSBTAG00000007115
bta-miR-181b	GOT2	ENSBTAG00000007172
bta-miR-181b	FKBP4	ENSBTAG00000007605
bta-miR-181b	PRDX3	ENSBTAG00000008731
bta-miR-181b	BLOC1S2	ENSBTAG00000010739
bta-miR-181b	SIRT1	ENSBTAG00000014023
bta-miR-181b	ILF3	ENSBTAG00000040076
bta-miR-181b	SFXN1	ENSBTAG00000014536
bta-miR-181b	FLVCR1	ENSBTAG00000015974
bta-miR-181b	FLVCR1	ENSBTAG00000015974
bta-miR-181b	ACADSB	ENSBTAG00000018041
bta-miR-181b	MPV17	ENSBTAG00000018269
bta-miR-181b	MPV17	ENSBTAG00000018269
bta-miR-181b	MPV17	ENSBTAG00000018269
bta-miR-181b	GRAMD4	ENSBTAG00000021803
bta-miR-181b	GRAMD4	ENSBTAG00000021803
bta-miR-181b	GRAMD4	ENSBTAG00000021803
bta-miR-181b	GRAMD4	ENSBTAG00000021803
bta-miR-181b	GRAMD4	ENSBTAG00000021803
bta-miR-181b	GRAMD4	ENSBTAG00000021803
bta-miR-181b	CBR4	ENSBTAG00000022013
bta-miR-181b	AFG3L2	ENSBTAG00000011250
bta-miR-181b	AFG3L2	ENSBTAG00000011250
bta-miR-181b	MRPS21	ENSBTAG00000024378
bta-miR-181b	TOMM5	ENSBTAG00000032777
bta-miR-181b	POLG	ENSBTAG00000009098
bta-miR-181b	TMEM135	ENSBTAG00000005482
bta-miR-181b	MRPS17	ENSBTAG00000007934
bta-miR-181c	PI4K2A	ENSBTAG00000002010
bta-miR-181c	TRAK2	ENSBTAG00000014933
bta-miR-181c	TRAK2	ENSBTAG00000014933
bta-miR-181c	TRAK2	ENSBTAG00000014933
bta-miR-181c	CHCHD4	ENSBTAG00000015529
bta-miR-181c	FBXO7	ENSBTAG00000020634
bta-miR-181c	CNR1	ENSBTAG00000054523
bta-miR-181c	CPT1A	ENSBTAG00000021999
bta-miR-181c	CPT1A	ENSBTAG00000021999
bta-miR-181c	NBR1	ENSBTAG00000001632
bta-miR-181c	NBR1	ENSBTAG00000001632
bta-miR-181c	NBR1	ENSBTAG00000001632
bta-miR-181c	NBR1	ENSBTAG00000001632
bta-miR-181c	NBR1	ENSBTAG00000001632
bta-miR-181c	NBR1	ENSBTAG00000001632
bta-miR-181c	NBR1	ENSBTAG00000001632
bta-miR-181c	NCBP1	ENSBTAG00000009732
bta-miR-181c	MCL1	ENSBTAG00000015154
bta-miR-181c	CPNE3	ENSBTAG00000015536
bta-miR-181c	SDHD	ENSBTAG00000016266
bta-miR-181c	NDUFS1	ENSBTAG00000021976
bta-miR-181c	GHITM	ENSBTAG00000032829
bta-miR-181c	CAVIN1	ENSBTAG00000039684
bta-miR-181c	NR3C1	ENSBTAG00000019472
bta-miR-181c	DHTKD1	ENSBTAG00000000291
bta-miR-181c	DHTKD1	ENSBTAG00000000291
bta-miR-181c	DHTKD1	ENSBTAG00000000291
bta-miR-181c	DHTKD1	ENSBTAG00000000291
bta-miR-181c	ACO1	ENSBTAG00000000555
bta-miR-181c	SLC25A24	ENSBTAG00000003752
bta-miR-181c	RAB11FIP5	ENSBTAG00000006162
bta-miR-181c	RAB11FIP5	ENSBTAG00000006162
bta-miR-181c	AK3	ENSBTAG00000017147
bta-miR-181c	MIGA1	ENSBTAG00000031044
bta-miR-181c	MTARC2	ENSBTAG00000016277
bta-miR-181c	DNAJA3	ENSBTAG00000010013
bta-miR-181c	DNAJA3	ENSBTAG00000010013
bta-miR-181c	FOXK2	ENSBTAG00000003687
bta-miR-181c	DDIT4	ENSBTAG00000000163
bta-miR-181c	RPS3	ENSBTAG00000005620
bta-miR-181c	MRPL43	ENSBTAG00000003294
bta-miR-181c	IVD	ENSBTAG00000004409
bta-miR-181c	MRPL13	ENSBTAG00000006767
bta-miR-181c	MRPL13	ENSBTAG00000006767
bta-miR-181c	AIFM1	ENSBTAG00000006838
bta-miR-181c	OAT	ENSBTAG00000006928
bta-miR-181c	GSR	ENSBTAG00000007115
bta-miR-181c	GOT2	ENSBTAG00000007172
bta-miR-181c	FKBP4	ENSBTAG00000007605
bta-miR-181c	PRDX3	ENSBTAG00000008731
bta-miR-181c	BLOC1S2	ENSBTAG00000010739
bta-miR-181c	SIRT1	ENSBTAG00000014023
bta-miR-181c	ILF3	ENSBTAG00000040076
bta-miR-181c	SFXN1	ENSBTAG00000014536
bta-miR-181c	FLVCR1	ENSBTAG00000015974
bta-miR-181c	FLVCR1	ENSBTAG00000015974
bta-miR-181c	ACADSB	ENSBTAG00000018041
bta-miR-181c	MPV17	ENSBTAG00000018269
bta-miR-181c	MPV17	ENSBTAG00000018269
bta-miR-181c	MPV17	ENSBTAG00000018269
bta-miR-181c	GRAMD4	ENSBTAG00000021803
bta-miR-181c	GRAMD4	ENSBTAG00000021803
bta-miR-181c	GRAMD4	ENSBTAG00000021803
bta-miR-181c	GRAMD4	ENSBTAG00000021803
bta-miR-181c	GRAMD4	ENSBTAG00000021803
bta-miR-181c	GRAMD4	ENSBTAG00000021803
bta-miR-181c	MRPS21	ENSBTAG00000024378
bta-miR-181c	TOMM5	ENSBTAG00000032777
bta-miR-181c	POLG	ENSBTAG00000009098
bta-miR-181c	TMEM135	ENSBTAG00000005482
bta-miR-181c	MRPS17	ENSBTAG00000007934
bta-miR-182	PI4K2A	ENSBTAG00000002010
bta-miR-182	SLC25A44	ENSBTAG00000009431
bta-miR-182	TGM2	ENSBTAG00000016208
bta-miR-182	TGM2	ENSBTAG00000016208
bta-miR-182	AKAP1	ENSBTAG00000025320
bta-miR-182	CNR1	ENSBTAG00000054523
bta-miR-182	SCCPDH	ENSBTAG00000003804
bta-miR-182	MRS2	ENSBTAG00000004979
bta-miR-182	KANK2	ENSBTAG00000009568
bta-miR-182	NCBP1	ENSBTAG00000009732
bta-miR-182	PDZD8	ENSBTAG00000011401
bta-miR-182	SLC25A51	ENSBTAG00000014936
bta-miR-182	MRPL53	ENSBTAG00000016599
bta-miR-182	MMUT	ENSBTAG00000014272
bta-miR-182	SLC25A24	ENSBTAG00000003752
bta-miR-182	NDUFB2	ENSBTAG00000021759
bta-miR-182	MIGA1	ENSBTAG00000031044
bta-miR-182	ENSBTAG00000050249	ENSBTAG00000050249
bta-miR-182	RAB5IF	ENSBTAG00000021805
bta-miR-182	ALDH5A1	ENSBTAG00000021902
bta-miR-182	PNKD	ENSBTAG00000003936
bta-miR-182	FOXK2	ENSBTAG00000003687
bta-miR-182	MRPL43	ENSBTAG00000003294
bta-miR-182	IVD	ENSBTAG00000004409
bta-miR-182	MRPS21	ENSBTAG00000024378
bta-miR-182	FAM210B	ENSBTAG00000013007
bta-miR-182	FUNDC2	ENSBTAG00000016977
bta-miR-182	ARMC1	ENSBTAG00000015901
bta-miR-182	TNRC18	ENSBTAG00000037400
bta-miR-182	TNRC18	ENSBTAG00000037400
bta-miR-182	TNRC18	ENSBTAG00000037400
bta-miR-182	TNRC18	ENSBTAG00000037400
bta-miR-182	TNRC18	ENSBTAG00000037400
bta-miR-182	TNRC18	ENSBTAG00000037400
bta-miR-182	TNRC18	ENSBTAG00000037400
bta-miR-182	PINK1	ENSBTAG00000006084
bta-miR-182	ABCE1	ENSBTAG00000019854
bta-miR-182	HJURP	ENSBTAG00000024726
bta-miR-182	CDK1	ENSBTAG00000010109
bta-miR-182	MRPL18	ENSBTAG00000001289
bta-miR-182	SLC44A2	ENSBTAG00000002628
bta-miR-182	SLC44A2	ENSBTAG00000002628
bta-miR-182	PRELID3B	ENSBTAG00000004402
bta-miR-182	SUCLG2	ENSBTAG00000009541
bta-miR-182	SQOR	ENSBTAG00000010365
bta-miR-183	NDUFAF6	ENSBTAG00000007570
bta-miR-183	TGM2	ENSBTAG00000016208
bta-miR-183	AKAP10	ENSBTAG00000003439
bta-miR-183	AKAP10	ENSBTAG00000003439
bta-miR-183	CNR1	ENSBTAG00000054523
bta-miR-183	ACSL1	ENSBTAG00000004344
bta-miR-183	PCCB	ENSBTAG00000015221
bta-miR-183	NCBP1	ENSBTAG00000009732
bta-miR-183	VDAC1	ENSBTAG00000013113
bta-miR-183	VDAC1	ENSBTAG00000013113
bta-miR-183	SLC25A51	ENSBTAG00000014936
bta-miR-183	SCO1	ENSBTAG00000021780
bta-miR-183	NR3C1	ENSBTAG00000019472
bta-miR-183	DHTKD1	ENSBTAG00000000291
bta-miR-183	DHTKD1	ENSBTAG00000000291
bta-miR-183	DHTKD1	ENSBTAG00000000291
bta-miR-183	DHTKD1	ENSBTAG00000000291
bta-miR-183	SFXN3	ENSBTAG00000005015
bta-miR-183	MIGA1	ENSBTAG00000031044
bta-miR-183	HK1	ENSBTAG00000012380
bta-miR-183	HK1	ENSBTAG00000012380
bta-miR-183	SLC25A38	ENSBTAG00000022721
bta-miR-183	MRPL49	ENSBTAG00000005075
bta-miR-183	MICU1	ENSBTAG00000005807
bta-miR-183	MICU1	ENSBTAG00000005807
bta-miR-183	POLDIP2	ENSBTAG00000008116
bta-miR-183	NDFIP2	ENSBTAG00000014227
bta-miR-183	MFN2	ENSBTAG00000005314
bta-miR-183	MFN2	ENSBTAG00000005314
bta-miR-183	PRKCA	ENSBTAG00000001061
bta-miR-183	STING1	ENSBTAG00000002296
bta-miR-183	STING1	ENSBTAG00000002296
bta-miR-183	IDH2	ENSBTAG00000014093
bta-miR-183	GOLPH3	ENSBTAG00000032848
bta-miR-183	NDUFA7	ENSBTAG00000052280
bta-miR-191	NRDC	ENSBTAG00000021174
bta-miR-191	NCBP1	ENSBTAG00000009732
bta-miR-191	MCL1	ENSBTAG00000015154
bta-miR-191	PGAM5	ENSBTAG00000007513
bta-miR-191	PRR14L	ENSBTAG00000009006
bta-miR-191	GSR	ENSBTAG00000007115
bta-miR-191	DLST	ENSBTAG00000006463
bta-miR-191	DLST	ENSBTAG00000006463
bta-miR-191	DHFR	ENSBTAG00000007681
bta-miR-191	MIPEP	ENSBTAG00000008888
bta-miR-191	SLC25A12	ENSBTAG00000016762
bta-miR-191	MRPL11	ENSBTAG00000053687
bta-miR-192	NDUFAF6	ENSBTAG00000007570
bta-miR-192	ZMIZ2	ENSBTAG00000011997
bta-miR-192	ZMIZ2	ENSBTAG00000011997
bta-miR-192	TUFM	ENSBTAG00000019216
bta-miR-192	ALDH6A1	ENSBTAG00000018469
bta-miR-192	PNKD	ENSBTAG00000003936
bta-miR-192	MRPL49	ENSBTAG00000005075
bta-miR-192	FAM210B	ENSBTAG00000013007
bta-miR-192	DLAT	ENSBTAG00000010709
bta-miR-192	FUNDC2	ENSBTAG00000016977
bta-miR-192	CISD2	ENSBTAG00000027630
bta-miR-193a-5p	NDUFV3	ENSBTAG00000021491
bta-miR-193a-5p	NDUFV3	ENSBTAG00000021491
bta-miR-193a-5p	NDUFV3	ENSBTAG00000021491
bta-miR-193a-5p	NBR1	ENSBTAG00000001632
bta-miR-193a-5p	NBR1	ENSBTAG00000001632
bta-miR-193a-5p	NBR1	ENSBTAG00000001632
bta-miR-193a-5p	NBR1	ENSBTAG00000001632
bta-miR-193a-5p	NBR1	ENSBTAG00000001632
bta-miR-193a-5p	NBR1	ENSBTAG00000001632
bta-miR-193a-5p	NBR1	ENSBTAG00000001632
bta-miR-193a-5p	MRPL10	ENSBTAG00000001832
bta-miR-193a-5p	CLPP	ENSBTAG00000014712
bta-miR-193a-5p	UQCC1	ENSBTAG00000030990
bta-miR-193a-5p	UQCC1	ENSBTAG00000030990
bta-miR-193a-5p	CAVIN1	ENSBTAG00000039684
bta-miR-193a-5p	MMUT	ENSBTAG00000014272
bta-miR-193a-5p	DHTKD1	ENSBTAG00000000291
bta-miR-193a-5p	DHTKD1	ENSBTAG00000000291
bta-miR-193a-5p	DHTKD1	ENSBTAG00000000291
bta-miR-193a-5p	DHTKD1	ENSBTAG00000000291
bta-miR-193a-5p	HK1	ENSBTAG00000012380
bta-miR-193a-5p	HK1	ENSBTAG00000012380
bta-miR-193a-5p	ENSBTAG00000050249	ENSBTAG00000050249
bta-miR-193a-5p	RAB5IF	ENSBTAG00000021805
bta-miR-193a-5p	ALDH5A1	ENSBTAG00000021902
bta-miR-193a-5p	SFXN1	ENSBTAG00000014536
bta-miR-193a-5p	MPV17	ENSBTAG00000018269
bta-miR-193a-5p	MPV17	ENSBTAG00000018269
bta-miR-193a-5p	MPV17	ENSBTAG00000018269
bta-miR-193a-5p	ATP5F1D	ENSBTAG00000000550
bta-miR-193a-5p	MICU1	ENSBTAG00000005807
bta-miR-193a-5p	MICU1	ENSBTAG00000005807
bta-miR-193a-5p	AGPAT4	ENSBTAG00000007668
bta-miR-193a-5p	POLDIP2	ENSBTAG00000008116
bta-miR-193a-5p	DELE1	ENSBTAG00000008435
bta-miR-193a-5p	SMDT1	ENSBTAG00000009508
bta-miR-193a-5p	WDR81	ENSBTAG00000011491
bta-miR-193a-5p	SDHAF2	ENSBTAG00000015266
bta-miR-193a-5p	CMC2	ENSBTAG00000017009
bta-miR-193a-5p	ATPSCKMT	ENSBTAG00000017885
bta-miR-193a-5p	SPG7	ENSBTAG00000012041
bta-miR-193a-5p	UQCRQ	ENSBTAG00000009479
bta-miR-193a-5p	DLST	ENSBTAG00000006463
bta-miR-193a-5p	DLST	ENSBTAG00000006463
bta-miR-1949	SLC25A44	ENSBTAG00000009431
bta-miR-1949	ABCB10	ENSBTAG00000017053
bta-miR-1949	PCCB	ENSBTAG00000015221
bta-miR-1949	KANK2	ENSBTAG00000009568
bta-miR-1949	CAVIN1	ENSBTAG00000039684
bta-miR-1949	NR3C1	ENSBTAG00000019472
bta-miR-1949	MTFR1	ENSBTAG00000008629
bta-miR-1949	TRIT1	ENSBTAG00000013832
bta-miR-1949	MRPL49	ENSBTAG00000005075
bta-miR-1949	SIRT1	ENSBTAG00000014023
bta-miR-1949	MRPS17	ENSBTAG00000007934
bta-miR-1949	MRPS17	ENSBTAG00000007934
bta-miR-1949	FAM210B	ENSBTAG00000013007
bta-miR-1949	PPTC7	ENSBTAG00000018332
bta-miR-1949	MRPL15	ENSBTAG00000001174
bta-miR-1949	PPP1CC	ENSBTAG00000011198
bta-miR-1949	IDH3A	ENSBTAG00000006227
bta-miR-1949	IDH3A	ENSBTAG00000006227
bta-miR-1949	MRPS34	ENSBTAG00000026415
bta-miR-1949	YME1L1	ENSBTAG00000016445
bta-miR-1949	YARS2	ENSBTAG00000011399
bta-miR-196a	ARMCX3	ENSBTAG00000037996
bta-miR-196a	CNR1	ENSBTAG00000054523
bta-miR-196a	FEN1	ENSBTAG00000000064
bta-miR-196a	MRS2	ENSBTAG00000004979
bta-miR-196a	CPNE3	ENSBTAG00000015536
bta-miR-196a	MRPL53	ENSBTAG00000016599
bta-miR-196a	RANBP2	ENSBTAG00000000152
bta-miR-196a	MMUT	ENSBTAG00000014272
bta-miR-196a	RDH13	ENSBTAG00000030393
bta-miR-196a	DHFR	ENSBTAG00000007681
bta-miR-196a	IDH1	ENSBTAG00000020527
bta-miR-196a	MYO19	ENSBTAG00000012675
bta-miR-196a	STMP1	ENSBTAG00000051809
bta-miR-200a	NDUFAF6	ENSBTAG00000007570
bta-miR-200a	ZMIZ2	ENSBTAG00000011997
bta-miR-200a	ZMIZ2	ENSBTAG00000011997
bta-miR-200a	ABCB10	ENSBTAG00000017053
bta-miR-200a	OGT	ENSBTAG00000000902
bta-miR-200a	OGT	ENSBTAG00000000902
bta-miR-200a	CNR1	ENSBTAG00000054523
bta-miR-200a	ARAF	ENSBTAG00000005039
bta-miR-200a	PCCB	ENSBTAG00000015221
bta-miR-200a	NAPG	ENSBTAG00000005158
bta-miR-200a	DEGS1	ENSBTAG00000012705
bta-miR-200a	SLC25A51	ENSBTAG00000014936
bta-miR-200a	SLC25A36	ENSBTAG00000015310
bta-miR-200a	SLC25A36	ENSBTAG00000015310
bta-miR-200a	SDHD	ENSBTAG00000016266
bta-miR-200a	MRPL53	ENSBTAG00000016599
bta-miR-200a	IDE	ENSBTAG00000019759
bta-miR-200a	GHITM	ENSBTAG00000032829
bta-miR-200a	PDHA1	ENSBTAG00000019852
bta-miR-200a	CAVIN1	ENSBTAG00000039684
bta-miR-200a	DCAF8	ENSBTAG00000005796
bta-miR-200a	DHTKD1	ENSBTAG00000000291
bta-miR-200a	DHTKD1	ENSBTAG00000000291
bta-miR-200a	DHTKD1	ENSBTAG00000000291
bta-miR-200a	DHTKD1	ENSBTAG00000000291
bta-miR-200a	ACO1	ENSBTAG00000000555
bta-miR-200a	CIAPIN1	ENSBTAG00000001854
bta-miR-200a	CCAR2	ENSBTAG00000005469
bta-miR-200a	NLRX1	ENSBTAG00000040569
bta-miR-200a	PACS2	ENSBTAG00000046346
bta-miR-200a	PACS2	ENSBTAG00000046346
bta-miR-200a	ENSBTAG00000050249	ENSBTAG00000050249
bta-miR-200a	OPA1	ENSBTAG00000019514
bta-miR-200a	TMBIM6	ENSBTAG00000018588
bta-miR-200a	NUDT9	ENSBTAG00000011354
bta-miR-200a	DDIT4	ENSBTAG00000000163
bta-miR-200a	OAT	ENSBTAG00000006928
bta-miR-200a	SIRT1	ENSBTAG00000014023
bta-miR-200a	MRPS21	ENSBTAG00000024378
bta-miR-200a	TMEM135	ENSBTAG00000005482
bta-miR-200a	WDR81	ENSBTAG00000011491
bta-miR-200a	MXD1	ENSBTAG00000001042
bta-miR-200a	MXD1	ENSBTAG00000001042
bta-miR-200a	MRPL15	ENSBTAG00000001174
bta-miR-200a	DLGAP5	ENSBTAG00000002331
bta-miR-200a	XPC	ENSBTAG00000007362
bta-miR-200a	XPC	ENSBTAG00000007362
bta-miR-200a	MGST1	ENSBTAG00000008541
bta-miR-200a	HSPD1	ENSBTAG00000012586
bta-miR-200a	HSPD1	ENSBTAG00000012586
bta-miR-200a	SLC25A3	ENSBTAG00000012890
bta-miR-200a	SLC25A3	ENSBTAG00000012890
bta-miR-200a	NDFIP2	ENSBTAG00000014227
bta-miR-200a	HADHA	ENSBTAG00000015038
bta-miR-200a	ARMC1	ENSBTAG00000015901
bta-miR-200a	SLC35F6	ENSBTAG00000018761
bta-miR-200a	COA3	ENSBTAG00000019911
bta-miR-200a	CA5B	ENSBTAG00000020418
bta-miR-200a	TNRC18	ENSBTAG00000037400
bta-miR-200a	TNRC18	ENSBTAG00000037400
bta-miR-200a	TNRC18	ENSBTAG00000037400
bta-miR-200a	TNRC18	ENSBTAG00000037400
bta-miR-200a	TNRC18	ENSBTAG00000037400
bta-miR-200a	TNRC18	ENSBTAG00000037400
bta-miR-200a	TNRC18	ENSBTAG00000037400
bta-miR-200a	PINK1	ENSBTAG00000006084
bta-miR-200a	ACADM	ENSBTAG00000024240
bta-miR-200a	MFN2	ENSBTAG00000005314
bta-miR-200a	MFN2	ENSBTAG00000005314
bta-miR-200a	ABCE1	ENSBTAG00000019854
bta-miR-200a	PRKCA	ENSBTAG00000001061
bta-miR-200a	NDUFS4	ENSBTAG00000003728
bta-miR-2285bf	TOMM70	ENSBTAG00000014302
bta-miR-2285bf	GHITM	ENSBTAG00000032829
bta-miR-2285bf	GHITM	ENSBTAG00000032829
bta-miR-2285bf	HADHB	ENSBTAG00000010083
bta-miR-2285bf	MRPL11	ENSBTAG00000053687
bta-miR-2285bf	XPC	ENSBTAG00000007362
bta-miR-2285bf	XPC	ENSBTAG00000007362
bta-miR-2285bf	MTCH1	ENSBTAG00000033453
bta-miR-2285bf	MRPL4	ENSBTAG00000001419
bta-miR-2285bf	PTRH2	ENSBTAG00000016710
bta-miR-2285bf	SIRT5	ENSBTAG00000014904
bta-miR-2285bf	SIRT5	ENSBTAG00000014904
bta-miR-2285bf	SIRT5	ENSBTAG00000014904
bta-miR-2285k	NR3C1	ENSBTAG00000019472
bta-miR-2285k	NDUFC2	ENSBTAG00000018188
bta-miR-2285k	CPT2	ENSBTAG00000014649
bta-miR-2285k	SUPV3L1	ENSBTAG00000001044
bta-miR-2285k	DAP3	ENSBTAG00000001199
bta-miR-2303	HSPA4	ENSBTAG00000015683
bta-miR-2303	TGM2	ENSBTAG00000016208
bta-miR-2303	TGM2	ENSBTAG00000016208
bta-miR-2303	KANK2	ENSBTAG00000009568
bta-miR-2303	NCBP1	ENSBTAG00000009732
bta-miR-2303	IDE	ENSBTAG00000019759
bta-miR-2303	NR3C1	ENSBTAG00000019472
bta-miR-2303	NR3C1	ENSBTAG00000019472
bta-miR-2303	CYB5B	ENSBTAG00000002412
bta-miR-2303	DCAF8	ENSBTAG00000005796
bta-miR-2303	OPA1	ENSBTAG00000019514
bta-miR-2303	COX7A2L	ENSBTAG00000000705
bta-miR-2303	TRIT1	ENSBTAG00000013832
bta-miR-2303	TMBIM6	ENSBTAG00000018588
bta-miR-2303	MIEF1	ENSBTAG00000017439
bta-miR-2303	P4HA1	ENSBTAG00000032996
bta-miR-2303	P4HA1	ENSBTAG00000032996
bta-miR-2303	BLOC1S2	ENSBTAG00000010739
bta-miR-2303	MRPS17	ENSBTAG00000007934
bta-miR-2303	FAM210B	ENSBTAG00000013007
bta-miR-2303	MRPL15	ENSBTAG00000001174
bta-miR-2303	SLC35F6	ENSBTAG00000018761
bta-miR-2303	HS1BP3	ENSBTAG00000015490
bta-miR-2303	HS1BP3	ENSBTAG00000015490
bta-miR-2303	CDK1	ENSBTAG00000010109
bta-miR-2303	GPD2	ENSBTAG00000009770
bta-miR-2303	GPD2	ENSBTAG00000009770
bta-miR-2303	CCDC51	ENSBTAG00000013413
bta-miR-2303	CCDC51	ENSBTAG00000013413
bta-miR-2303	PPP1CC	ENSBTAG00000011198
bta-miR-2303	AIFM2	ENSBTAG00000001165
bta-miR-2303	MRPS18B	ENSBTAG00000006936
bta-miR-2303	CRYAB	ENSBTAG00000000434
bta-miR-2303	CRYAB	ENSBTAG00000000434
bta-miR-2303	CRYAB	ENSBTAG00000000434
bta-miR-2303	COX7A2	ENSBTAG00000005096
bta-miR-2303	YME1L1	ENSBTAG00000016445
bta-miR-2303	HKDC1	ENSBTAG00000033398
bta-miR-2303	MTHFD1L	ENSBTAG00000009846
bta-miR-2303	ECHDC3	ENSBTAG00000012377
bta-miR-2332	NOL6	ENSBTAG00000003323
bta-miR-2332	USP48	ENSBTAG00000006940
bta-miR-2332	USP48	ENSBTAG00000006940
bta-miR-2332	HSPA4	ENSBTAG00000015683
bta-miR-2332	AKAP10	ENSBTAG00000003439
bta-miR-2332	NAPG	ENSBTAG00000005158
bta-miR-2332	NAPG	ENSBTAG00000005158
bta-miR-2332	PDZD8	ENSBTAG00000011401
bta-miR-2332	SLC25A51	ENSBTAG00000014936
bta-miR-2332	MIGA1	ENSBTAG00000031044
bta-miR-2332	STOM	ENSBTAG00000038375
bta-miR-2332	CREBZF	ENSBTAG00000000455
bta-miR-2332	DLAT	ENSBTAG00000010709
bta-miR-2332	MGST1	ENSBTAG00000008541
bta-miR-2332	ARMC1	ENSBTAG00000015901
bta-miR-2332	CA5B	ENSBTAG00000020418
bta-miR-2332	CA5B	ENSBTAG00000020418
bta-miR-2332	SPART	ENSBTAG00000008040
bta-miR-2332	C3H1orf43	ENSBTAG00000020026
bta-miR-2332	C3H1orf43	ENSBTAG00000020026
bta-miR-2332	C3H1orf43	ENSBTAG00000020026
bta-miR-2332	SLC44A2	ENSBTAG00000002628
bta-miR-2332	SLC44A2	ENSBTAG00000002628
bta-miR-2332	GRSF1	ENSBTAG00000008577
bta-miR-2332	GRSF1	ENSBTAG00000008577
bta-miR-2332	UQCR11	ENSBTAG00000008692
bta-miR-2332	SLC25A4	ENSBTAG00000013208
bta-miR-2332	DHRS4	ENSBTAG00000017665
bta-miR-2332	TMX2	ENSBTAG00000002404
bta-miR-2332	COX7B	ENSBTAG00000047768
bta-miR-2335	TMEM14C	ENSBTAG00000005808
bta-miR-2335	HSPA4	ENSBTAG00000015683
bta-miR-2335	CLPP	ENSBTAG00000014712
bta-miR-2335	SLC25A51	ENSBTAG00000014936
bta-miR-2335	MCUR1	ENSBTAG00000001475
bta-miR-2335	MPV17L2	ENSBTAG00000025788
bta-miR-2335	MPV17L2	ENSBTAG00000025788
bta-miR-2335	PPTC7	ENSBTAG00000018332
bta-miR-2335	COX5B	ENSBTAG00000053107
bta-miR-2335	CDC25C	ENSBTAG00000005293
bta-miR-2335	ATP5MK	ENSBTAG00000009713
bta-miR-2335	YARS2	ENSBTAG00000011399
bta-miR-2335	FDX1	ENSBTAG00000011793
bta-miR-2335	CPT2	ENSBTAG00000014649
bta-miR-2335	VSIG10L	ENSBTAG00000020447
bta-miR-2370-5p	PARP1	ENSBTAG00000000837
bta-miR-2370-5p	SLC25A44	ENSBTAG00000009431
bta-miR-2370-5p	CHCHD4	ENSBTAG00000015529
bta-miR-2370-5p	ABCB10	ENSBTAG00000017053
bta-miR-2370-5p	AKAP1	ENSBTAG00000025320
bta-miR-2370-5p	AKAP10	ENSBTAG00000003439
bta-miR-2370-5p	CNR1	ENSBTAG00000054523
bta-miR-2370-5p	PCCB	ENSBTAG00000015221
bta-miR-2370-5p	HK2	ENSBTAG00000013108
bta-miR-2370-5p	FEN1	ENSBTAG00000000064
bta-miR-2370-5p	RAD51	ENSBTAG00000002918
bta-miR-2370-5p	KANK2	ENSBTAG00000009568
bta-miR-2370-5p	NCBP1	ENSBTAG00000009732
bta-miR-2370-5p	NCBP1	ENSBTAG00000009732
bta-miR-2370-5p	SDHD	ENSBTAG00000016266
bta-miR-2370-5p	MRPL53	ENSBTAG00000016599
bta-miR-2370-5p	IDE	ENSBTAG00000019759
bta-miR-2370-5p	PDHA1	ENSBTAG00000019852
bta-miR-2370-5p	MMUT	ENSBTAG00000014272
bta-miR-2370-5p	CYB5B	ENSBTAG00000002412
bta-miR-2370-5p	SLC25A24	ENSBTAG00000003752
bta-miR-2370-5p	BCL2L1	ENSBTAG00000006526
bta-miR-2370-5p	BCL2L1	ENSBTAG00000006526
bta-miR-2370-5p	RAB29	ENSBTAG00000003232
bta-miR-2370-5p	TMBIM6	ENSBTAG00000018588
bta-miR-2370-5p	DNAJA3	ENSBTAG00000010013
bta-miR-2370-5p	DNAJA3	ENSBTAG00000010013
bta-miR-2370-5p	NUDT9	ENSBTAG00000011354
bta-miR-2370-5p	MIEF1	ENSBTAG00000017439
bta-miR-2370-5p	ATF2	ENSBTAG00000002295
bta-miR-2370-5p	IVD	ENSBTAG00000004409
bta-miR-2370-5p	OAT	ENSBTAG00000006928
bta-miR-2370-5p	BLOC1S2	ENSBTAG00000010739
bta-miR-2370-5p	FLVCR1	ENSBTAG00000015974
bta-miR-2370-5p	FLVCR1	ENSBTAG00000015974
bta-miR-2370-5p	MPV17	ENSBTAG00000018269
bta-miR-2370-5p	MPV17	ENSBTAG00000018269
bta-miR-2370-5p	MPV17	ENSBTAG00000018269
bta-miR-2370-5p	CBR4	ENSBTAG00000022013
bta-miR-2370-5p	ATPSCKMT	ENSBTAG00000017885
bta-miR-2370-5p	DIABLO	ENSBTAG00000004199
bta-miR-2370-5p	RAD51C	ENSBTAG00000015036
bta-miR-2370-5p	PPTC7	ENSBTAG00000018332
bta-miR-2370-5p	MXD1	ENSBTAG00000001042
bta-miR-2370-5p	MXD1	ENSBTAG00000001042
bta-miR-2370-5p	PGRMC1	ENSBTAG00000019552
bta-miR-2370-5p	PGRMC1	ENSBTAG00000019552
bta-miR-2370-5p	CISD2	ENSBTAG00000027630
bta-miR-2370-5p	COA3	ENSBTAG00000019911
bta-miR-2370-5p	MFN2	ENSBTAG00000005314
bta-miR-2370-5p	MFN2	ENSBTAG00000005314
bta-miR-2370-5p	NDUFS4	ENSBTAG00000003728
bta-miR-2370-5p	MRPS10	ENSBTAG00000015301
bta-miR-2370-5p	TOMM20	ENSBTAG00000000562
bta-miR-2370-5p	GABARAPL1	ENSBTAG00000011765
bta-miR-2370-5p	ALDH18A1	ENSBTAG00000011832
bta-miR-2370-5p	ALDH7A1	ENSBTAG00000009646
bta-miR-2370-5p	C3H1orf43	ENSBTAG00000020026
bta-miR-2370-5p	C3H1orf43	ENSBTAG00000020026
bta-miR-2370-5p	COX5B	ENSBTAG00000053107
bta-miR-2370-5p	GOLPH3	ENSBTAG00000032848
bta-miR-2370-5p	IDH1	ENSBTAG00000020527
bta-miR-2370-5p	MYO19	ENSBTAG00000012675
bta-miR-2370-5p	VPS35	ENSBTAG00000002493
bta-miR-2370-5p	KIFBP	ENSBTAG00000014561
bta-miR-2370-5p	VASN	ENSBTAG00000046339
bta-miR-2370-5p	TMX2	ENSBTAG00000002404
bta-miR-2370-5p	REXO2	ENSBTAG00000005843
bta-miR-2370-5p	MRPL17	ENSBTAG00000024781
bta-miR-2408	CPNE3	ENSBTAG00000015536
bta-miR-2408	MUL1	ENSBTAG00000020850
bta-miR-2408	ACO1	ENSBTAG00000000555
bta-miR-2408	SFXN1	ENSBTAG00000014536
bta-miR-2408	AGPAT4	ENSBTAG00000007668
bta-miR-2408	MXD1	ENSBTAG00000001042
bta-miR-2408	MXD1	ENSBTAG00000001042
bta-miR-2408	TNRC18	ENSBTAG00000037400
bta-miR-2408	TNRC18	ENSBTAG00000037400
bta-miR-2408	TNRC18	ENSBTAG00000037400
bta-miR-2408	TNRC18	ENSBTAG00000037400
bta-miR-2408	TNRC18	ENSBTAG00000037400
bta-miR-2408	TNRC18	ENSBTAG00000037400
bta-miR-2408	TNRC18	ENSBTAG00000037400
bta-miR-2408	MRPS7	ENSBTAG00000016133
bta-miR-2408	ZFYVE1	ENSBTAG00000011041
bta-miR-2408	ZFYVE1	ENSBTAG00000011041
bta-miR-2408	SLC25A13	ENSBTAG00000003773
bta-miR-2408	SLC25A13	ENSBTAG00000003773
bta-miR-2408	MTHFD2	ENSBTAG00000004881
bta-miR-2408	PTRH2	ENSBTAG00000016710
bta-miR-2431-3p	BAK1	ENSBTAG00000000428
bta-miR-2431-3p	NOL6	ENSBTAG00000003323
bta-miR-2431-3p	ZDHHC8	ENSBTAG00000006657
bta-miR-2431-3p	ZMIZ2	ENSBTAG00000011997
bta-miR-2431-3p	ZMIZ2	ENSBTAG00000011997
bta-miR-2431-3p	MAVS	ENSBTAG00000013545
bta-miR-2431-3p	ARAF	ENSBTAG00000005039
bta-miR-2431-3p	ARAF	ENSBTAG00000005039
bta-miR-2431-3p	FEN1	ENSBTAG00000000064
bta-miR-2431-3p	NAPG	ENSBTAG00000005158
bta-miR-2431-3p	NAPG	ENSBTAG00000005158
bta-miR-2431-3p	FKBP10	ENSBTAG00000011454
bta-miR-2431-3p	CLPP	ENSBTAG00000014712
bta-miR-2431-3p	MCL1	ENSBTAG00000015154
bta-miR-2431-3p	SLC25A36	ENSBTAG00000015310
bta-miR-2431-3p	SLC25A36	ENSBTAG00000015310
bta-miR-2431-3p	IDE	ENSBTAG00000019759
bta-miR-2431-3p	ASS1	ENSBTAG00000020747
bta-miR-2431-3p	ASS1	ENSBTAG00000020747
bta-miR-2431-3p	SCO1	ENSBTAG00000021780
bta-miR-2431-3p	DCAF8	ENSBTAG00000005796
bta-miR-2431-3p	CIAPIN1	ENSBTAG00000001854
bta-miR-2431-3p	CCAR2	ENSBTAG00000005469
bta-miR-2431-3p	BCL2L1	ENSBTAG00000006526
bta-miR-2431-3p	BCL2L1	ENSBTAG00000006526
bta-miR-2431-3p	BCL2L13	ENSBTAG00000013956
bta-miR-2431-3p	AK3	ENSBTAG00000017147
bta-miR-2431-3p	ACACB	ENSBTAG00000022058
bta-miR-2431-3p	ACACB	ENSBTAG00000022058
bta-miR-2431-3p	PACS2	ENSBTAG00000046346
bta-miR-2431-3p	PACS2	ENSBTAG00000046346
bta-miR-2431-3p	RAB29	ENSBTAG00000003232
bta-miR-2431-3p	YKT6	ENSBTAG00000000274
bta-miR-2431-3p	MRPL54	ENSBTAG00000008396
bta-miR-2431-3p	MIEF1	ENSBTAG00000017439
bta-miR-2431-3p	MPV17L2	ENSBTAG00000025788
bta-miR-2431-3p	MPV17L2	ENSBTAG00000025788
bta-miR-2431-3p	MRPL12	ENSBTAG00000000417
bta-miR-2431-3p	SFXN1	ENSBTAG00000014536
bta-miR-2431-3p	AFG3L2	ENSBTAG00000011250
bta-miR-2431-3p	AFG3L2	ENSBTAG00000011250
bta-miR-2431-3p	AGPAT4	ENSBTAG00000007668
bta-miR-2431-3p	POLDIP2	ENSBTAG00000008116
bta-miR-2431-3p	TMEM11	ENSBTAG00000010566
bta-miR-2431-3p	TMEM11	ENSBTAG00000010566
bta-miR-2431-3p	TMEM11	ENSBTAG00000010566
bta-miR-2431-3p	PPTC7	ENSBTAG00000018332
bta-miR-2431-3p	MRPL15	ENSBTAG00000001174
bta-miR-2431-3p	NDFIP2	ENSBTAG00000014227
bta-miR-2431-3p	COA3	ENSBTAG00000019911
bta-miR-2431-3p	PRKCA	ENSBTAG00000001061
bta-miR-2431-3p	HS1BP3	ENSBTAG00000015490
bta-miR-2431-3p	HS1BP3	ENSBTAG00000015490
bta-miR-2431-3p	MTCH1	ENSBTAG00000033453
bta-miR-2431-3p	MCU	ENSBTAG00000003876
bta-miR-2431-3p	MCU	ENSBTAG00000003876
bta-miR-2431-3p	AIFM2	ENSBTAG00000001165
bta-miR-2431-3p	SLC44A2	ENSBTAG00000002628
bta-miR-2431-3p	SLC44A2	ENSBTAG00000002628
bta-miR-2431-3p	NDUFA7	ENSBTAG00000052280
bta-miR-2431-3p	IDH1	ENSBTAG00000020527
bta-miR-2431-3p	MRPL4	ENSBTAG00000001419
bta-miR-2431-3p	ECHDC3	ENSBTAG00000012377
bta-miR-2431-3p	VSIG10L	ENSBTAG00000020447
bta-miR-2431-3p	ARL2BP	ENSBTAG00000004844
bta-miR-2431-3p	FECH	ENSBTAG00000006393
bta-miR-2431-3p	POLRMT	ENSBTAG00000015051
bta-miR-30a-5p	NDUFAF6	ENSBTAG00000007570
bta-miR-30a-5p	AKAP10	ENSBTAG00000003439
bta-miR-30a-5p	AKAP10	ENSBTAG00000003439
bta-miR-30a-5p	CNR1	ENSBTAG00000054523
bta-miR-30a-5p	PCCB	ENSBTAG00000015221
bta-miR-30a-5p	LRRK1	ENSBTAG00000001567
bta-miR-30a-5p	SLC25A51	ENSBTAG00000014936
bta-miR-30a-5p	CPNE3	ENSBTAG00000015536
bta-miR-30a-5p	IDE	ENSBTAG00000019759
bta-miR-30a-5p	SCO1	ENSBTAG00000021780
bta-miR-30a-5p	TOMM40L	ENSBTAG00000009213
bta-miR-30a-5p	CYB5B	ENSBTAG00000002412
bta-miR-30a-5p	CAPN1	ENSBTAG00000010230
bta-miR-30a-5p	ARID4B	ENSBTAG00000000222
bta-miR-30a-5p	P4HA1	ENSBTAG00000032996
bta-miR-30a-5p	P4HA1	ENSBTAG00000032996
bta-miR-30a-5p	DDIT4	ENSBTAG00000000163
bta-miR-30a-5p	SIRT1	ENSBTAG00000014023
bta-miR-30a-5p	SFXN1	ENSBTAG00000014536
bta-miR-30a-5p	FLVCR1	ENSBTAG00000015974
bta-miR-30a-5p	FLVCR1	ENSBTAG00000015974
bta-miR-30a-5p	POLG	ENSBTAG00000009098
bta-miR-30a-5p	DIABLO	ENSBTAG00000004199
bta-miR-30a-5p	TMEM11	ENSBTAG00000010566
bta-miR-30a-5p	TMEM11	ENSBTAG00000010566
bta-miR-30a-5p	TMEM11	ENSBTAG00000010566
bta-miR-30a-5p	FAM210B	ENSBTAG00000013007
bta-miR-30a-5p	RAD51C	ENSBTAG00000015036
bta-miR-30a-5p	ARGLU1	ENSBTAG00000015124
bta-miR-30a-5p	NDUFC2	ENSBTAG00000018188
bta-miR-30a-5p	PPTC7	ENSBTAG00000018332
bta-miR-30a-5p	BECN1	ENSBTAG00000019914
bta-miR-30a-5p	BECN1	ENSBTAG00000019914
bta-miR-30a-5p	HSPA5	ENSBTAG00000007662
bta-miR-30a-5p	ME1	ENSBTAG00000005681
bta-miR-30a-5p	SLC44A1	ENSBTAG00000007163
bta-miR-30e-5p	NDUFAF6	ENSBTAG00000007570
bta-miR-30e-5p	AKAP10	ENSBTAG00000003439
bta-miR-30e-5p	AKAP10	ENSBTAG00000003439
bta-miR-30e-5p	CNR1	ENSBTAG00000054523
bta-miR-30e-5p	PCCB	ENSBTAG00000015221
bta-miR-30e-5p	LRRK1	ENSBTAG00000001567
bta-miR-30e-5p	SLC25A51	ENSBTAG00000014936
bta-miR-30e-5p	CPNE3	ENSBTAG00000015536
bta-miR-30e-5p	IDE	ENSBTAG00000019759
bta-miR-30e-5p	TOMM40L	ENSBTAG00000009213
bta-miR-30e-5p	CYB5B	ENSBTAG00000002412
bta-miR-30e-5p	CAPN1	ENSBTAG00000010230
bta-miR-30e-5p	ARID4B	ENSBTAG00000000222
bta-miR-30e-5p	P4HA1	ENSBTAG00000032996
bta-miR-30e-5p	P4HA1	ENSBTAG00000032996
bta-miR-30e-5p	DDIT4	ENSBTAG00000000163
bta-miR-30e-5p	SIRT1	ENSBTAG00000014023
bta-miR-30e-5p	SFXN1	ENSBTAG00000014536
bta-miR-30e-5p	FLVCR1	ENSBTAG00000015974
bta-miR-30e-5p	FLVCR1	ENSBTAG00000015974
bta-miR-30e-5p	POLG	ENSBTAG00000009098
bta-miR-30e-5p	DIABLO	ENSBTAG00000004199
bta-miR-30e-5p	TMEM11	ENSBTAG00000010566
bta-miR-30e-5p	TMEM11	ENSBTAG00000010566
bta-miR-30e-5p	TMEM11	ENSBTAG00000010566
bta-miR-30e-5p	FAM210B	ENSBTAG00000013007
bta-miR-30e-5p	RAD51C	ENSBTAG00000015036
bta-miR-30e-5p	ARGLU1	ENSBTAG00000015124
bta-miR-30e-5p	NDUFC2	ENSBTAG00000018188
bta-miR-30e-5p	PPTC7	ENSBTAG00000018332
bta-miR-30e-5p	BECN1	ENSBTAG00000019914
bta-miR-30e-5p	BECN1	ENSBTAG00000019914
bta-miR-30e-5p	HSPA5	ENSBTAG00000007662
bta-miR-30e-5p	ME1	ENSBTAG00000005681
bta-miR-30e-5p	SLC44A1	ENSBTAG00000007163
bta-miR-30f	NDUFAF6	ENSBTAG00000007570
bta-miR-30f	AKAP10	ENSBTAG00000003439
bta-miR-30f	AKAP10	ENSBTAG00000003439
bta-miR-30f	CNR1	ENSBTAG00000054523
bta-miR-30f	PCCB	ENSBTAG00000015221
bta-miR-30f	LRRK1	ENSBTAG00000001567
bta-miR-30f	CPNE3	ENSBTAG00000015536
bta-miR-30f	IDE	ENSBTAG00000019759
bta-miR-30f	SCO1	ENSBTAG00000021780
bta-miR-30f	CYB5B	ENSBTAG00000002412
bta-miR-30f	CAPN1	ENSBTAG00000010230
bta-miR-30f	ARID4B	ENSBTAG00000000222
bta-miR-30f	PNKD	ENSBTAG00000003936
bta-miR-30f	P4HA1	ENSBTAG00000032996
bta-miR-30f	P4HA1	ENSBTAG00000032996
bta-miR-30f	SFXN1	ENSBTAG00000014536
bta-miR-30f	FLVCR1	ENSBTAG00000015974
bta-miR-30f	FLVCR1	ENSBTAG00000015974
bta-miR-30f	POLG	ENSBTAG00000009098
bta-miR-30f	TMEM135	ENSBTAG00000005482
bta-miR-30f	DIABLO	ENSBTAG00000004199
bta-miR-30f	TMEM11	ENSBTAG00000010566
bta-miR-30f	TMEM11	ENSBTAG00000010566
bta-miR-30f	TMEM11	ENSBTAG00000010566
bta-miR-30f	RAD51C	ENSBTAG00000015036
bta-miR-30f	ARGLU1	ENSBTAG00000015124
bta-miR-30f	HSPA5	ENSBTAG00000007662
bta-miR-30f	SLC44A1	ENSBTAG00000007163
bta-miR-31	PI4K2A	ENSBTAG00000002010
bta-miR-31	ZDHHC8	ENSBTAG00000006657
bta-miR-31	NDUFAF6	ENSBTAG00000007570
bta-miR-31	SRC	ENSBTAG00000008938
bta-miR-31	SLC25A44	ENSBTAG00000009431
bta-miR-31	MRPL51	ENSBTAG00000014729
bta-miR-31	NDUFV3	ENSBTAG00000021491
bta-miR-31	NDUFV3	ENSBTAG00000021491
bta-miR-31	NDUFV3	ENSBTAG00000021491
bta-miR-31	AKAP1	ENSBTAG00000025320
bta-miR-31	PCCB	ENSBTAG00000015221
bta-miR-31	CLPP	ENSBTAG00000014712
bta-miR-31	MRPL53	ENSBTAG00000016599
bta-miR-31	AK2	ENSBTAG00000017605
bta-miR-31	SCO1	ENSBTAG00000021780
bta-miR-31	DCAF8	ENSBTAG00000005796
bta-miR-31	DHTKD1	ENSBTAG00000000291
bta-miR-31	DHTKD1	ENSBTAG00000000291
bta-miR-31	DHTKD1	ENSBTAG00000000291
bta-miR-31	DHTKD1	ENSBTAG00000000291
bta-miR-31	ACO1	ENSBTAG00000000555
bta-miR-31	CIAPIN1	ENSBTAG00000001854
bta-miR-31	SCP2	ENSBTAG00000003746
bta-miR-31	SLC25A24	ENSBTAG00000003752
bta-miR-31	SFXN3	ENSBTAG00000005015
bta-miR-31	CCAR2	ENSBTAG00000005469
bta-miR-31	RAB11FIP5	ENSBTAG00000006162
bta-miR-31	RAB11FIP5	ENSBTAG00000006162
bta-miR-31	ACO2	ENSBTAG00000006429
bta-miR-31	BCL2L1	ENSBTAG00000006526
bta-miR-31	BCL2L1	ENSBTAG00000006526
bta-miR-31	MTFR1	ENSBTAG00000008629
bta-miR-31	UQCRH	ENSBTAG00000009603
bta-miR-31	RAB32	ENSBTAG00000009784
bta-miR-31	NLRX1	ENSBTAG00000040569
bta-miR-31	BCL2L13	ENSBTAG00000013956
bta-miR-31	AK3	ENSBTAG00000017147
bta-miR-31	QRSL1	ENSBTAG00000017557
bta-miR-31	NDUFB2	ENSBTAG00000021759
bta-miR-31	MIGA1	ENSBTAG00000031044
bta-miR-31	ACACB	ENSBTAG00000022058
bta-miR-31	PITRM1	ENSBTAG00000002685
bta-miR-31	HK1	ENSBTAG00000012380
bta-miR-31	HK1	ENSBTAG00000012380
bta-miR-31	STOM	ENSBTAG00000038375
bta-miR-31	PACS2	ENSBTAG00000046346
bta-miR-31	PACS2	ENSBTAG00000046346
bta-miR-31	ENSBTAG00000050249	ENSBTAG00000050249
bta-miR-31	UBA1	ENSBTAG00000016764
bta-miR-31	OPA1	ENSBTAG00000019514
bta-miR-320a	BAK1	ENSBTAG00000000428
bta-miR-320a	PARP1	ENSBTAG00000000837
bta-miR-320a	PMPCA	ENSBTAG00000001353
bta-miR-320a	ABCB10	ENSBTAG00000017053
bta-miR-320a	AKAP10	ENSBTAG00000003439
bta-miR-320a	CNR1	ENSBTAG00000054523
bta-miR-320a	HK2	ENSBTAG00000013108
bta-miR-320a	FEN1	ENSBTAG00000000064
bta-miR-320a	ENSBTAG00000055145	ENSBTAG00000055145
bta-miR-320a	LRRK1	ENSBTAG00000001567
bta-miR-320a	MRPL10	ENSBTAG00000001832
bta-miR-320a	RAD51	ENSBTAG00000002918
bta-miR-320a	SCCPDH	ENSBTAG00000003804
bta-miR-320a	MRS2	ENSBTAG00000004979
bta-miR-320a	NAPG	ENSBTAG00000005158
bta-miR-320a	NAPG	ENSBTAG00000005158
bta-miR-320a	RIPK1	ENSBTAG00000006378
bta-miR-320a	SUCLA2	ENSBTAG00000006759
bta-miR-320a	STX17	ENSBTAG00000008016
bta-miR-320a	NDUFB10	ENSBTAG00000009534
bta-miR-320a	KANK2	ENSBTAG00000009568
bta-miR-320a	NCBP1	ENSBTAG00000009732
bta-miR-320a	MAPK1	ENSBTAG00000010312
bta-miR-320a	PDZD8	ENSBTAG00000011401
bta-miR-320a	FKBP10	ENSBTAG00000011454
bta-miR-320a	DEGS1	ENSBTAG00000012705
bta-miR-320a	VDAC1	ENSBTAG00000013113
bta-miR-320a	VDAC1	ENSBTAG00000013113
bta-miR-320a	TOMM70	ENSBTAG00000014302
bta-miR-320a	CLPP	ENSBTAG00000014712
bta-miR-320a	SLC25A51	ENSBTAG00000014936
bta-miR-320a	MCL1	ENSBTAG00000015154
bta-miR-320a	SLC25A36	ENSBTAG00000015310
bta-miR-320a	SLC25A36	ENSBTAG00000015310
bta-miR-320a	CPNE3	ENSBTAG00000015536
bta-miR-320a	SDHD	ENSBTAG00000016266
bta-miR-320a	MRPL53	ENSBTAG00000016599
bta-miR-320a	AK2	ENSBTAG00000017605
bta-miR-320a	ACSL5	ENSBTAG00000006707
bta-miR-320a	ACSL5	ENSBTAG00000006707
bta-miR-320a	IDE	ENSBTAG00000019759
bta-miR-320a	ASS1	ENSBTAG00000020747
bta-miR-320a	ASS1	ENSBTAG00000020747
bta-miR-320a	MUL1	ENSBTAG00000020850
bta-miR-320a	SCO1	ENSBTAG00000021780
bta-miR-320a	NDUFS1	ENSBTAG00000021976
bta-miR-320a	SHMT2	ENSBTAG00000031500
bta-miR-320a	UQCC1	ENSBTAG00000030990
bta-miR-320a	UQCC1	ENSBTAG00000030990
bta-miR-320a	RANBP2	ENSBTAG00000000152
bta-miR-320a	GHITM	ENSBTAG00000032829
bta-miR-320a	GHITM	ENSBTAG00000032829
bta-miR-320a	TOMM40L	ENSBTAG00000009213
bta-miR-320a	PDHA1	ENSBTAG00000019852
bta-miR-320a	MSRB3	ENSBTAG00000044017
bta-miR-320a	MSRB3	ENSBTAG00000044017
bta-miR-320a	CAVIN1	ENSBTAG00000039684
bta-miR-320a	MCUR1	ENSBTAG00000001475
bta-miR-320a	ALDH6A1	ENSBTAG00000018469
bta-miR-320a	HADHB	ENSBTAG00000010083
bta-miR-320a	MMUT	ENSBTAG00000014272
bta-miR-320a	NR3C1	ENSBTAG00000019472
bta-miR-320a	CYB5B	ENSBTAG00000002412
bta-miR-320a	DCAF8	ENSBTAG00000005796
bta-miR-320a	CAPN1	ENSBTAG00000010230
bta-miR-342	MRPL51	ENSBTAG00000014729
bta-miR-342	TGM2	ENSBTAG00000016208
bta-miR-342	TGM2	ENSBTAG00000016208
bta-miR-342	SLC25A30	ENSBTAG00000016529
bta-miR-342	MTHFS	ENSBTAG00000020023
bta-miR-342	USP30	ENSBTAG00000019845
bta-miR-342	ARMCX3	ENSBTAG00000037996
bta-miR-342	NBR1	ENSBTAG00000001632
bta-miR-342	NBR1	ENSBTAG00000001632
bta-miR-342	NBR1	ENSBTAG00000001632
bta-miR-342	NBR1	ENSBTAG00000001632
bta-miR-342	NBR1	ENSBTAG00000001632
bta-miR-342	NBR1	ENSBTAG00000001632
bta-miR-342	NBR1	ENSBTAG00000001632
bta-miR-342	NAPG	ENSBTAG00000005158
bta-miR-342	NAPG	ENSBTAG00000005158
bta-miR-342	MCL1	ENSBTAG00000015154
bta-miR-342	SLC25A36	ENSBTAG00000015310
bta-miR-342	SLC25A36	ENSBTAG00000015310
bta-miR-342	IDE	ENSBTAG00000019759
bta-miR-342	MUL1	ENSBTAG00000020850
bta-miR-342	SCO1	ENSBTAG00000021780
bta-miR-342	SCO1	ENSBTAG00000021780
bta-miR-342	NDUFS1	ENSBTAG00000021976
bta-miR-342	UQCC1	ENSBTAG00000030990
bta-miR-342	CAVIN1	ENSBTAG00000039684
bta-miR-342	NR3C1	ENSBTAG00000019472
bta-miR-342	CYB5B	ENSBTAG00000002412
bta-miR-342	DHTKD1	ENSBTAG00000000291
bta-miR-342	DHTKD1	ENSBTAG00000000291
bta-miR-342	DHTKD1	ENSBTAG00000000291
bta-miR-342	DHTKD1	ENSBTAG00000000291
bta-miR-342	ACO2	ENSBTAG00000006429
bta-miR-342	BCL2L1	ENSBTAG00000006526
bta-miR-342	BCL2L1	ENSBTAG00000006526
bta-miR-342	PACS2	ENSBTAG00000046346
bta-miR-342	PACS2	ENSBTAG00000046346
bta-miR-342	PTCD3	ENSBTAG00000006482
bta-miR-342	MIEF1	ENSBTAG00000017439
bta-miR-342	DDIT4	ENSBTAG00000000163
bta-miR-342	MPV17	ENSBTAG00000018269
bta-miR-342	MPV17	ENSBTAG00000018269
bta-miR-342	MPV17	ENSBTAG00000018269
bta-miR-342	AGPAT4	ENSBTAG00000007668
bta-miR-342	TMEM11	ENSBTAG00000010566
bta-miR-342	TMEM11	ENSBTAG00000010566
bta-miR-342	TMEM11	ENSBTAG00000010566
bta-miR-342	BECN1	ENSBTAG00000019914
bta-miR-342	BECN1	ENSBTAG00000019914
bta-miR-342	DLGAP5	ENSBTAG00000002331
bta-miR-342	NDFIP2	ENSBTAG00000014227
bta-miR-342	PRKCA	ENSBTAG00000001061
bta-miR-342	DCPS	ENSBTAG00000002879
bta-miR-342	ATP5MG	ENSBTAG00000007332
bta-miR-342	CHCHD2	ENSBTAG00000040295
bta-miR-342	BCKDHA	ENSBTAG00000016037
bta-miR-342	MRPS7	ENSBTAG00000016133
bta-miR-342	RPS6KB1	ENSBTAG00000016851
bta-miR-342	LIG3	ENSBTAG00000018689
bta-miR-342	LIG1	ENSBTAG00000014595
bta-miR-3432a	PMPCA	ENSBTAG00000001353
bta-miR-3432a	CIAPIN1	ENSBTAG00000001854
bta-miR-3432a	SIRT2	ENSBTAG00000001776
bta-miR-3432a	SIRT2	ENSBTAG00000001776
bta-miR-3613a	PDZD8	ENSBTAG00000011401
bta-miR-3613a	MCL1	ENSBTAG00000015154
bta-miR-3613a	MPV17L2	ENSBTAG00000025788
bta-miR-3613a	MPV17L2	ENSBTAG00000025788
bta-miR-3613a	CBR4	ENSBTAG00000022013
bta-miR-3613a	CERT1	ENSBTAG00000000081
bta-miR-3613a	CERT1	ENSBTAG00000000081
bta-miR-3613a	MYO19	ENSBTAG00000012675
bta-miR-3613a	COX7B	ENSBTAG00000047768
bta-miR-425-5p	ZDHHC8	ENSBTAG00000006657
bta-miR-425-5p	HSPA4	ENSBTAG00000015683
bta-miR-425-5p	TGM2	ENSBTAG00000016208
bta-miR-425-5p	AKAP1	ENSBTAG00000025320
bta-miR-425-5p	CPT1A	ENSBTAG00000021999
bta-miR-425-5p	CPT1A	ENSBTAG00000021999
bta-miR-425-5p	MRPL10	ENSBTAG00000001832
bta-miR-425-5p	NAPG	ENSBTAG00000005158
bta-miR-425-5p	NAPG	ENSBTAG00000005158
bta-miR-425-5p	ACO2	ENSBTAG00000006429
bta-miR-425-5p	HK1	ENSBTAG00000012380
bta-miR-425-5p	HK1	ENSBTAG00000012380
bta-miR-425-5p	ARID4B	ENSBTAG00000000222
bta-miR-425-5p	RDH13	ENSBTAG00000030393
bta-miR-425-5p	MCAT	ENSBTAG00000002413
bta-miR-425-5p	MRPL58	ENSBTAG00000003303
bta-miR-425-5p	MRPS6	ENSBTAG00000012594
bta-miR-425-5p	MRPS6	ENSBTAG00000012594
bta-miR-425-5p	HJURP	ENSBTAG00000024726
bta-miR-425-5p	HS1BP3	ENSBTAG00000015490
bta-miR-425-5p	HS1BP3	ENSBTAG00000015490
bta-miR-425-5p	MRPS10	ENSBTAG00000015301
bta-miR-451	BAK1	ENSBTAG00000000428
bta-miR-451	ZMIZ2	ENSBTAG00000011997
bta-miR-451	ZMIZ2	ENSBTAG00000011997
bta-miR-451	SLC25A36	ENSBTAG00000015310
bta-miR-451	SLC25A36	ENSBTAG00000015310
bta-miR-451	HK1	ENSBTAG00000012380
bta-miR-451	HK1	ENSBTAG00000012380
bta-miR-451	PPTC7	ENSBTAG00000018332
bta-miR-451	ME1	ENSBTAG00000005681
bta-miR-451	IDH3A	ENSBTAG00000006227
bta-miR-451	IDH3A	ENSBTAG00000006227
bta-miR-451	PSEN1	ENSBTAG00000011757
bta-miR-451	PSEN1	ENSBTAG00000011757
bta-miR-451	COX10	ENSBTAG00000015294
bta-miR-497	PI4K2A	ENSBTAG00000002010
bta-miR-497	NOL6	ENSBTAG00000003323
bta-miR-497	SLC25A44	ENSBTAG00000009431
bta-miR-497	ALDH4A1	ENSBTAG00000030335
bta-miR-497	ALDH4A1	ENSBTAG00000030335
bta-miR-497	KLC2	ENSBTAG00000019334
bta-miR-497	OGT	ENSBTAG00000000902
bta-miR-497	OGT	ENSBTAG00000000902
bta-miR-497	OGT	ENSBTAG00000000902
bta-miR-497	NBR1	ENSBTAG00000001632
bta-miR-497	NBR1	ENSBTAG00000001632
bta-miR-497	NBR1	ENSBTAG00000001632
bta-miR-497	NBR1	ENSBTAG00000001632
bta-miR-497	NBR1	ENSBTAG00000001632
bta-miR-497	NBR1	ENSBTAG00000001632
bta-miR-497	NBR1	ENSBTAG00000001632
bta-miR-497	NBR1	ENSBTAG00000001632
bta-miR-497	ACSL1	ENSBTAG00000004344
bta-miR-497	ACSL1	ENSBTAG00000004344
bta-miR-497	ACSL1	ENSBTAG00000004344
bta-miR-497	ACSL1	ENSBTAG00000004344
bta-miR-497	NRDC	ENSBTAG00000021174
bta-miR-497	FEN1	ENSBTAG00000000064
bta-miR-497	LRRK1	ENSBTAG00000001567
bta-miR-497	NAPG	ENSBTAG00000005158
bta-miR-497	NAPG	ENSBTAG00000005158
bta-miR-497	NCBP1	ENSBTAG00000009732
bta-miR-497	CPNE3	ENSBTAG00000015536
bta-miR-497	UQCC1	ENSBTAG00000030990
bta-miR-497	UQCC1	ENSBTAG00000030990
bta-miR-497	CAVIN1	ENSBTAG00000039684
bta-miR-497	ALDH6A1	ENSBTAG00000018469
bta-miR-497	DCAF8	ENSBTAG00000005796
bta-miR-497	DHTKD1	ENSBTAG00000000291
bta-miR-497	DHTKD1	ENSBTAG00000000291
bta-miR-497	DHTKD1	ENSBTAG00000000291
bta-miR-497	DHTKD1	ENSBTAG00000000291
bta-miR-497	SFXN3	ENSBTAG00000005015
bta-miR-497	RAB11FIP5	ENSBTAG00000006162
bta-miR-497	RAB11FIP5	ENSBTAG00000006162
bta-miR-497	ACO2	ENSBTAG00000006429
bta-miR-497	NLRX1	ENSBTAG00000040569
bta-miR-497	AK3	ENSBTAG00000017147
bta-miR-497	MIGA1	ENSBTAG00000031044
bta-miR-497	ACACB	ENSBTAG00000022058
bta-miR-497	RAB29	ENSBTAG00000003232
bta-miR-497	TMBIM6	ENSBTAG00000018588
bta-miR-497	MRPL54	ENSBTAG00000008396
bta-miR-497	PRR14L	ENSBTAG00000009006
bta-miR-497	PRR14L	ENSBTAG00000009006
bta-miR-497	MIEF1	ENSBTAG00000017439
bta-miR-497	RDH13	ENSBTAG00000030393
bta-miR-497	ATF2	ENSBTAG00000002295
bta-miR-497	IVD	ENSBTAG00000004409
bta-miR-497	AFG3L2	ENSBTAG00000011250
bta-miR-497	AFG3L2	ENSBTAG00000011250
bta-miR-497	TMEM135	ENSBTAG00000005482
bta-miR-497	MICU1	ENSBTAG00000005807
bta-miR-497	MICU1	ENSBTAG00000005807
bta-miR-497	SDHAF2	ENSBTAG00000015266
bta-miR-497	DLST	ENSBTAG00000006463
bta-miR-497	DLST	ENSBTAG00000006463
bta-miR-497	FAM210B	ENSBTAG00000013007
bta-miR-497	ME1	ENSBTAG00000005681
bta-miR-497	MXD1	ENSBTAG00000001042
bta-miR-497	MXD1	ENSBTAG00000001042
bta-miR-497	NFS1	ENSBTAG00000006962
bta-miR-497	TIMM44	ENSBTAG00000015567
bta-miR-497	GCAT	ENSBTAG00000008434
bta-miR-497	SLC35F6	ENSBTAG00000018761
bta-miR-497	CA5B	ENSBTAG00000020418
bta-miR-497	CA5B	ENSBTAG00000020418
bta-miR-497	TNRC18	ENSBTAG00000037400
bta-miR-497	TNRC18	ENSBTAG00000037400
bta-miR-497	TNRC18	ENSBTAG00000037400
bta-miR-497	TNRC18	ENSBTAG00000037400
bta-miR-497	TNRC18	ENSBTAG00000037400
bta-miR-497	TNRC18	ENSBTAG00000037400
bta-miR-497	TNRC18	ENSBTAG00000037400
bta-miR-497	HS1BP3	ENSBTAG00000015490
bta-miR-497	HS1BP3	ENSBTAG00000015490
bta-miR-497	TXN2	ENSBTAG00000000014
bta-miR-497	CERT1	ENSBTAG00000000081
bta-miR-497	CERT1	ENSBTAG00000000081
bta-miR-497	TOMM20	ENSBTAG00000000562
bta-miR-497	STING1	ENSBTAG00000002296
bta-miR-497	STING1	ENSBTAG00000002296
bta-miR-497	ATAD3A	ENSBTAG00000002219
bta-miR-497	ZFYVE1	ENSBTAG00000011041
bta-miR-497	ZFYVE1	ENSBTAG00000011041
bta-miR-497	ISCU	ENSBTAG00000011787
bta-miR-497	NFKB1	ENSBTAG00000020270
bta-miR-497	BCAP31	ENSBTAG00000020547
bta-miR-497	SIRT4	ENSBTAG00000021168
bta-miR-497	MRPL45	ENSBTAG00000025001
bta-miR-497	GABARAPL1	ENSBTAG00000011765
bta-miR-497	NARS2	ENSBTAG00000039943
bta-miR-497	CDK1	ENSBTAG00000010109
bta-miR-503-3p	CLPP	ENSBTAG00000014712
bta-miR-503-3p	NR3C1	ENSBTAG00000019472
bta-miR-503-3p	MRPL49	ENSBTAG00000005075
bta-miR-503-3p	NUDT9	ENSBTAG00000011354
bta-miR-503-3p	CBR4	ENSBTAG00000022013
bta-miR-503-3p	ME1	ENSBTAG00000005681
bta-miR-503-3p	NDUFS6	ENSBTAG00000009914
bta-miR-503-3p	NDUFS6	ENSBTAG00000009914
bta-miR-503-3p	GRSF1	ENSBTAG00000008577
bta-miR-503-3p	GRSF1	ENSBTAG00000008577
bta-miR-503-3p	ARL2BP	ENSBTAG00000004844
bta-miR-503-3p	SSBP1	ENSBTAG00000010931
bta-miR-574	ZMIZ2	ENSBTAG00000011997
bta-miR-574	ZMIZ2	ENSBTAG00000011997
bta-miR-574	TGM2	ENSBTAG00000016208
bta-miR-574	AKAP10	ENSBTAG00000003439
bta-miR-574	ACSL1	ENSBTAG00000004344
bta-miR-574	ACSL1	ENSBTAG00000004344
bta-miR-574	ACSL1	ENSBTAG00000004344
bta-miR-574	ACSL1	ENSBTAG00000004344
bta-miR-574	FKBP10	ENSBTAG00000011454
bta-miR-574	CAVIN1	ENSBTAG00000039684
bta-miR-574	MMUT	ENSBTAG00000014272
bta-miR-574	DCAF8	ENSBTAG00000005796
bta-miR-574	QRSL1	ENSBTAG00000017557
bta-miR-574	PACS2	ENSBTAG00000046346
bta-miR-574	PACS2	ENSBTAG00000046346
bta-miR-574	SLC25A38	ENSBTAG00000022721
bta-miR-574	YKT6	ENSBTAG00000000274
bta-miR-574	FKBP4	ENSBTAG00000007605
bta-miR-574	FUNDC2	ENSBTAG00000016977
bta-miR-574	BCKDHA	ENSBTAG00000016037
bta-miR-574	NFKB1	ENSBTAG00000020270
bta-miR-574	OGDH	ENSBTAG00000006029
bta-miR-574	OGDH	ENSBTAG00000006029
bta-miR-574	OGDH	ENSBTAG00000006029
bta-miR-574	OGDH	ENSBTAG00000006029
bta-miR-574	OGDH	ENSBTAG00000006029
bta-miR-574	OGDH	ENSBTAG00000006029
bta-miR-574	OGDH	ENSBTAG00000006029
bta-miR-574	OGDH	ENSBTAG00000006029
bta-miR-574	OGDH	ENSBTAG00000006029
bta-miR-574	OGDH	ENSBTAG00000006029
bta-miR-574	BCKDK	ENSBTAG00000010524
bta-miR-574	BCKDK	ENSBTAG00000010524
bta-miR-574	SAMM50	ENSBTAG00000045957
bta-miR-574	PUS1	ENSBTAG00000012990
bta-miR-574	PUS1	ENSBTAG00000012990
bta-miR-574	CLIC1	ENSBTAG00000013533
bta-miR-574	NDUFB9	ENSBTAG00000020405
bta-miR-6119-3p	CHCHD4	ENSBTAG00000015529
bta-miR-6119-3p	MTHFS	ENSBTAG00000020023
bta-miR-6119-3p	CPT1A	ENSBTAG00000021999
bta-miR-6119-3p	CPT1A	ENSBTAG00000021999
bta-miR-6119-3p	NBR1	ENSBTAG00000001632
bta-miR-6119-3p	NBR1	ENSBTAG00000001632
bta-miR-6119-3p	NBR1	ENSBTAG00000001632
bta-miR-6119-3p	NBR1	ENSBTAG00000001632
bta-miR-6119-3p	NBR1	ENSBTAG00000001632
bta-miR-6119-3p	NBR1	ENSBTAG00000001632
bta-miR-6119-3p	NBR1	ENSBTAG00000001632
bta-miR-6119-3p	MRS2	ENSBTAG00000004979
bta-miR-6119-3p	IDE	ENSBTAG00000019759
bta-miR-6119-3p	NR3C1	ENSBTAG00000019472
bta-miR-6119-3p	DHTKD1	ENSBTAG00000000291
bta-miR-6119-3p	DHTKD1	ENSBTAG00000000291
bta-miR-6119-3p	DHTKD1	ENSBTAG00000000291
bta-miR-6119-3p	DHTKD1	ENSBTAG00000000291
bta-miR-6119-3p	AK3	ENSBTAG00000017147
bta-miR-6119-3p	ENSBTAG00000050249	ENSBTAG00000050249
bta-miR-6119-3p	MTARC2	ENSBTAG00000016277
bta-miR-6119-3p	NUDT9	ENSBTAG00000011354
bta-miR-6119-3p	MIEF1	ENSBTAG00000017439
bta-miR-6119-3p	ATPSCKMT	ENSBTAG00000017885
bta-miR-6119-3p	TP53	ENSBTAG00000001069
bta-miR-6119-3p	PRELID3B	ENSBTAG00000004402
bta-miR-6119-3p	GRPEL1	ENSBTAG00000010181
bta-miR-6119-3p	GRSF1	ENSBTAG00000008577
bta-miR-6119-3p	GRSF1	ENSBTAG00000008577
bta-miR-6119-3p	PHB2	ENSBTAG00000013123
bta-miR-6119-5p	PI4K2A	ENSBTAG00000002010
bta-miR-6119-5p	ZDHHC8	ENSBTAG00000006657
bta-miR-6119-5p	MTHFS	ENSBTAG00000020023
bta-miR-6119-5p	CNR1	ENSBTAG00000054523
bta-miR-6119-5p	MAPK1	ENSBTAG00000010312
bta-miR-6119-5p	SLC25A51	ENSBTAG00000014936
bta-miR-6119-5p	SCO1	ENSBTAG00000021780
bta-miR-6119-5p	NDUFS1	ENSBTAG00000021976
bta-miR-6119-5p	TOMM40L	ENSBTAG00000009213
bta-miR-6119-5p	PDHA1	ENSBTAG00000019852
bta-miR-6119-5p	CAVIN1	ENSBTAG00000039684
bta-miR-6119-5p	MCUR1	ENSBTAG00000001475
bta-miR-6119-5p	CYB5B	ENSBTAG00000002412
bta-miR-6119-5p	DCAF8	ENSBTAG00000005796
bta-miR-6119-5p	MRPL54	ENSBTAG00000008396
bta-miR-6119-5p	FKBP4	ENSBTAG00000007605
bta-miR-6119-5p	DIABLO	ENSBTAG00000004199
bta-miR-6119-5p	PPTC7	ENSBTAG00000018332
bta-miR-6119-5p	ABCE1	ENSBTAG00000019854
bta-miR-6119-5p	TOMM20	ENSBTAG00000000562
bta-miR-6119-5p	IDH2	ENSBTAG00000014093
bta-miR-6119-5p	SUCLG2	ENSBTAG00000009541
bta-miR-6119-5p	GOLPH3	ENSBTAG00000032848
bta-miR-6119-5p	ABCB8	ENSBTAG00000007759
bta-miR-6121-3p	PYCR1	ENSBTAG00000000042
bta-miR-6121-3p	PYCR1	ENSBTAG00000000042
bta-miR-6121-3p	PYCR1	ENSBTAG00000000042
bta-miR-6121-3p	ALDH18A1	ENSBTAG00000011832
bta-miR-6121-3p	CHCHD3	ENSBTAG00000024723
bta-miR-6535	BAK1	ENSBTAG00000000428
bta-miR-6535	PI4K2A	ENSBTAG00000002010
bta-miR-6535	ZDHHC8	ENSBTAG00000006657
bta-miR-6535	TGM2	ENSBTAG00000016208
bta-miR-6535	TGM2	ENSBTAG00000016208
bta-miR-6535	KLC2	ENSBTAG00000019334
bta-miR-6535	FBXW8	ENSBTAG00000036183
bta-miR-6535	CNR1	ENSBTAG00000054523
bta-miR-6535	HK2	ENSBTAG00000013108
bta-miR-6535	KANK2	ENSBTAG00000009568
bta-miR-6535	NCBP1	ENSBTAG00000009732
bta-miR-6535	PDZD8	ENSBTAG00000011401
bta-miR-6535	FKBP10	ENSBTAG00000011454
bta-miR-6535	SDHD	ENSBTAG00000016266
bta-miR-6535	UQCC1	ENSBTAG00000030990
bta-miR-6535	MCUR1	ENSBTAG00000001475
bta-miR-6535	MMUT	ENSBTAG00000014272
bta-miR-6535	DCAF8	ENSBTAG00000005796
bta-miR-6535	DHTKD1	ENSBTAG00000000291
bta-miR-6535	DHTKD1	ENSBTAG00000000291
bta-miR-6535	DHTKD1	ENSBTAG00000000291
bta-miR-6535	DHTKD1	ENSBTAG00000000291
bta-miR-6535	RAB11FIP5	ENSBTAG00000006162
[truncated: 181 more rows]
