# Supplementary material for: Identification and functional analysis of circular RNAs during mitochondrial damage induced by infectious bovine rhinotracheitis virus infection in Madin–Darby bovine kidney cells
Source: Research Square preprint supplement (doi:10.21203/rs.3.rs-6754910/v1), 2025-06-20
Supplement: Supplementary file 16 [file b3947ed61d00873c00553d11.xlsx]

## Sheet: Table S24
Table S24: CircRNA FISH probe sequences
circRNA FISH probe name	FISH probe sequence (5'-3')
novel_circ_002584 FISH probe 1	TGCCAT+TATCTGGT+TCTCCTCC+TGC
novel_circ_002584 FISH probe 2	TCA+TGCCAT+TATCTGGT+TCTCCTCC
novel_circ_002584 FISH probe 3	CAGC+TCATGCCAT+TATCTGGT+TCTC
novel_circ_004326 FISH probe 1	AGGCACCTGT+TTCTTCA+TCTAT+TCT
novel_circ_004326 FISH probe 2	AC+TGTCAGGCACCTG+TTTCT+TCATC
novel_circ_004326 FISH probe 3	GCT+TAAC+TGTCAGGCACCTG+TTTCT
