# Supplementary material for: Identification and functional analysis of circular RNAs during mitochondrial damage induced by infectious bovine rhinotracheitis virus infection in Madin–Darby bovine kidney cells
Source: Research Square preprint supplement (doi:10.21203/rs.3.rs-6754910/v1), 2025-06-20
Supplement: Supplementary file 17 [file bf5c7b582d311245404444dc.xlsx]

## Sheet: Table S17
Table S17：CircRNA-miRNA-mitochondria-related target gene regulatory networks
stargeting relationship pairs of 106 circRNA and 56 miRNAs
miRNA	miRNA log2(fc)	down/up	circRNA	circRNA log2(fc)	down/up
bta-let-7a-5p	0.474666	up	novel_circ_000224	-3.1526	down
bta-let-7a-5p	0.474666	up	novel_circ_000227	-2.18925	down
bta-let-7a-5p	0.474666	up	novel_circ_000237	-2.57564	down
bta-let-7a-5p	0.474666	up	novel_circ_000246	-2.02038	down
bta-let-7a-5p	0.474666	up	novel_circ_000597	-0.56441	down
bta-let-7a-5p	0.474666	up	novel_circ_000696	-2.36984	down
bta-let-7b	0.85716	up	novel_circ_000597	-0.56441	down
bta-let-7a-5p	0.474666	up	novel_circ_000844	-19.0959	down
bta-let-7a-5p	0.474666	up	novel_circ_000847	-3.28825	down
bta-let-7a-5p	0.474666	up	novel_circ_000848	-2.75279	down
bta-let-7a-5p	0.474666	up	novel_circ_000876	-1.97713	down
bta-let-7a-5p	0.474666	up	novel_circ_001043	-1.08228	down
bta-let-7a-5p	0.474666	up	novel_circ_001209	-18.7773	down
bta-let-7a-5p	0.474666	up	novel_circ_001267	-19.6809	down
bta-let-7a-5p	0.474666	up	novel_circ_001344	-3.07672	down
bta-let-7a-5p	0.474666	up	novel_circ_001457	-18.7289	down
bta-let-7a-5p	0.474666	up	novel_circ_001459	-2.59308	down
bta-let-7a-5p	0.474666	up	novel_circ_001549	-18.7522	down
bta-let-7a-5p	0.474666	up	novel_circ_001669	-1.33689	down
bta-let-7a-5p	0.474666	up	novel_circ_001681	-1.40692	down
bta-let-7a-5p	0.474666	up	novel_circ_002262	-18.7278	down
bta-let-7a-5p	0.474666	up	novel_circ_002379	-19.0959	down
bta-let-7a-5p	0.474666	up	novel_circ_002424	-18.6743	down
bta-let-7a-5p	0.474666	up	novel_circ_002477	-19.1506	down
bta-let-7a-5p	0.474666	up	novel_circ_002480	-18.7522	down
bta-let-7a-5p	0.474666	up	novel_circ_002745	-18.6809	down
bta-let-7a-5p	0.474666	up	novel_circ_002764	-18.7299	down
bta-let-7a-5p	0.474666	up	novel_circ_002834	-18.8262	down
bta-let-7a-5p	0.474666	up	novel_circ_002958	-1.66316	down
bta-let-7a-5p	0.474666	up	novel_circ_003014	-1.53114	down
bta-let-7a-5p	0.474666	up	novel_circ_003024	-18.7299	down
bta-let-7a-5p	0.474666	up	novel_circ_003305	-1.5998	down
bta-let-7a-5p	0.474666	up	novel_circ_003608	-3.35138	down
bta-let-7a-5p	0.474666	up	novel_circ_003635	-2.02298	down
bta-let-7a-5p	0.474666	up	novel_circ_003863	-2.96941	down
bta-let-7a-5p	0.474666	up	novel_circ_003929	-19.1506	down
bta-let-7a-5p	0.474666	up	novel_circ_004280	-18.7533	down
bta-let-7b	0.85716	up	novel_circ_000224	-3.1526	down
bta-let-7b	0.85716	up	novel_circ_000227	-2.18925	down
bta-let-7b	0.85716	up	novel_circ_000237	-2.57564	down
bta-let-7b	0.85716	up	novel_circ_000246	-2.02038	down
bta-let-7d	0.202672	up	novel_circ_000597	-0.56441	down
bta-let-7b	0.85716	up	novel_circ_000696	-2.36984	down
bta-let-7e	0.260966	up	novel_circ_000597	-0.56441	down
bta-let-7b	0.85716	up	novel_circ_000844	-19.0959	down
bta-let-7b	0.85716	up	novel_circ_000847	-3.28825	down
bta-let-7b	0.85716	up	novel_circ_000848	-2.75279	down
bta-let-7b	0.85716	up	novel_circ_000876	-1.97713	down
bta-let-7b	0.85716	up	novel_circ_001043	-1.08228	down
bta-let-7b	0.85716	up	novel_circ_001209	-18.7773	down
bta-let-7b	0.85716	up	novel_circ_001267	-19.6809	down
bta-let-7b	0.85716	up	novel_circ_001344	-3.07672	down
bta-let-7b	0.85716	up	novel_circ_001457	-18.7289	down
bta-let-7b	0.85716	up	novel_circ_001459	-2.59308	down
bta-let-7b	0.85716	up	novel_circ_001533	-2.0915	down
bta-let-7b	0.85716	up	novel_circ_001549	-18.7522	down
bta-let-7b	0.85716	up	novel_circ_001669	-1.33689	down
bta-let-7b	0.85716	up	novel_circ_001681	-1.40692	down
bta-let-7b	0.85716	up	novel_circ_002262	-18.7278	down
bta-let-7b	0.85716	up	novel_circ_002379	-19.0959	down
bta-let-7b	0.85716	up	novel_circ_002424	-18.6743	down
bta-let-7b	0.85716	up	novel_circ_002477	-19.1506	down
bta-let-7b	0.85716	up	novel_circ_002480	-18.7522	down
bta-let-7b	0.85716	up	novel_circ_002745	-18.6809	down
bta-let-7b	0.85716	up	novel_circ_002764	-18.7299	down
bta-let-7b	0.85716	up	novel_circ_002834	-18.8262	down
bta-let-7b	0.85716	up	novel_circ_002958	-1.66316	down
bta-let-7b	0.85716	up	novel_circ_003014	-1.53114	down
bta-let-7b	0.85716	up	novel_circ_003024	-18.7299	down
bta-let-7b	0.85716	up	novel_circ_003262	-3.45725	down
bta-let-7b	0.85716	up	novel_circ_003305	-1.5998	down
bta-let-7b	0.85716	up	novel_circ_003608	-3.35138	down
bta-let-7b	0.85716	up	novel_circ_003635	-2.02298	down
bta-let-7b	0.85716	up	novel_circ_003863	-2.96941	down
bta-let-7b	0.85716	up	novel_circ_003929	-19.1506	down
bta-let-7b	0.85716	up	novel_circ_004280	-18.7533	down
bta-let-7d	0.202672	up	novel_circ_000224	-3.1526	down
bta-let-7d	0.202672	up	novel_circ_000227	-2.18925	down
bta-let-7d	0.202672	up	novel_circ_000237	-2.57564	down
bta-let-7d	0.202672	up	novel_circ_000246	-2.02038	down
bta-let-7g	0.100167	up	novel_circ_000597	-0.56441	down
bta-let-7d	0.202672	up	novel_circ_000696	-2.36984	down
bta-let-7d	0.202672	up	novel_circ_000844	-19.0959	down
bta-let-7d	0.202672	up	novel_circ_000847	-3.28825	down
bta-let-7d	0.202672	up	novel_circ_000848	-2.75279	down
bta-let-7d	0.202672	up	novel_circ_000876	-1.97713	down
bta-let-7d	0.202672	up	novel_circ_001043	-1.08228	down
bta-let-7d	0.202672	up	novel_circ_001267	-19.6809	down
bta-let-7d	0.202672	up	novel_circ_001344	-3.07672	down
bta-let-7d	0.202672	up	novel_circ_001457	-18.7289	down
bta-let-7d	0.202672	up	novel_circ_001459	-2.59308	down
bta-let-7d	0.202672	up	novel_circ_001549	-18.7522	down
bta-let-7d	0.202672	up	novel_circ_001669	-1.33689	down
bta-let-7d	0.202672	up	novel_circ_001681	-1.40692	down
bta-let-7d	0.202672	up	novel_circ_002262	-18.7278	down
bta-let-7d	0.202672	up	novel_circ_002379	-19.0959	down
bta-let-7d	0.202672	up	novel_circ_002424	-18.6743	down
bta-let-7d	0.202672	up	novel_circ_002477	-19.1506	down
bta-let-7d	0.202672	up	novel_circ_002480	-18.7522	down
bta-let-7d	0.202672	up	novel_circ_002745	-18.6809	down
bta-let-7d	0.202672	up	novel_circ_002764	-18.7299	down
bta-let-7d	0.202672	up	novel_circ_002834	-18.8262	down
bta-let-7d	0.202672	up	novel_circ_002958	-1.66316	down
bta-let-7d	0.202672	up	novel_circ_003014	-1.53114	down
bta-let-7d	0.202672	up	novel_circ_003024	-18.7299	down
bta-let-7d	0.202672	up	novel_circ_003305	-1.5998	down
bta-let-7d	0.202672	up	novel_circ_003608	-3.35138	down
bta-let-7d	0.202672	up	novel_circ_003635	-2.02298	down
bta-let-7d	0.202672	up	novel_circ_003863	-2.96941	down
bta-let-7d	0.202672	up	novel_circ_003929	-19.1506	down
bta-let-7d	0.202672	up	novel_circ_004280	-18.7533	down
bta-let-7e	0.260966	up	novel_circ_000224	-3.1526	down
bta-let-7e	0.260966	up	novel_circ_000227	-2.18925	down
bta-let-7e	0.260966	up	novel_circ_000237	-2.57564	down
bta-let-7e	0.260966	up	novel_circ_000246	-2.02038	down
bta-miR-10162-5p	0.407572	up	novel_circ_000597	-0.56441	down
bta-let-7e	0.260966	up	novel_circ_000696	-2.36984	down
bta-miR-10a	0.43081	up	novel_circ_000597	-0.56441	down
bta-let-7e	0.260966	up	novel_circ_000847	-3.28825	down
bta-let-7e	0.260966	up	novel_circ_000848	-2.75279	down
bta-let-7e	0.260966	up	novel_circ_001267	-19.6809	down
bta-let-7e	0.260966	up	novel_circ_001344	-3.07672	down
bta-let-7e	0.260966	up	novel_circ_001459	-2.59308	down
bta-let-7e	0.260966	up	novel_circ_001549	-18.7522	down
bta-let-7e	0.260966	up	novel_circ_001669	-1.33689	down
bta-let-7e	0.260966	up	novel_circ_001681	-1.40692	down
bta-let-7e	0.260966	up	novel_circ_002262	-18.7278	down
bta-let-7e	0.260966	up	novel_circ_002477	-19.1506	down
bta-let-7e	0.260966	up	novel_circ_002480	-18.7522	down
bta-let-7e	0.260966	up	novel_circ_002745	-18.6809	down
bta-let-7e	0.260966	up	novel_circ_002764	-18.7299	down
bta-let-7e	0.260966	up	novel_circ_002834	-18.8262	down
bta-let-7e	0.260966	up	novel_circ_002958	-1.66316	down
bta-let-7e	0.260966	up	novel_circ_003014	-1.53114	down
bta-let-7e	0.260966	up	novel_circ_003024	-18.7299	down
bta-let-7e	0.260966	up	novel_circ_003305	-1.5998	down
bta-let-7e	0.260966	up	novel_circ_003627	-2.4812	down
bta-let-7e	0.260966	up	novel_circ_003635	-2.02298	down
bta-let-7e	0.260966	up	novel_circ_003863	-2.96941	down
bta-let-7e	0.260966	up	novel_circ_003929	-19.1506	down
bta-let-7g	0.100167	up	novel_circ_000227	-2.18925	down
bta-let-7g	0.100167	up	novel_circ_000237	-2.57564	down
bta-let-7g	0.100167	up	novel_circ_000246	-2.02038	down
bta-miR-10b	0.220867	up	novel_circ_000597	-0.56441	down
bta-let-7g	0.100167	up	novel_circ_000696	-2.36984	down
bta-let-7g	0.100167	up	novel_circ_000844	-19.0959	down
bta-let-7g	0.100167	up	novel_circ_000847	-3.28825	down
bta-let-7g	0.100167	up	novel_circ_000848	-2.75279	down
bta-let-7g	0.100167	up	novel_circ_001267	-19.6809	down
bta-let-7g	0.100167	up	novel_circ_001344	-3.07672	down
bta-let-7g	0.100167	up	novel_circ_001459	-2.59308	down
bta-let-7g	0.100167	up	novel_circ_001549	-18.7522	down
bta-let-7g	0.100167	up	novel_circ_001669	-1.33689	down
bta-let-7g	0.100167	up	novel_circ_002262	-18.7278	down
bta-let-7g	0.100167	up	novel_circ_002379	-19.0959	down
bta-let-7g	0.100167	up	novel_circ_002424	-18.6743	down
bta-let-7g	0.100167	up	novel_circ_002477	-19.1506	down
bta-let-7g	0.100167	up	novel_circ_002480	-18.7522	down
bta-let-7g	0.100167	up	novel_circ_002745	-18.6809	down
bta-let-7g	0.100167	up	novel_circ_002764	-18.7299	down
bta-let-7g	0.100167	up	novel_circ_002958	-1.66316	down
bta-let-7g	0.100167	up	novel_circ_003014	-1.53114	down
bta-let-7g	0.100167	up	novel_circ_003024	-18.7299	down
bta-let-7g	0.100167	up	novel_circ_003305	-1.5998	down
bta-let-7g	0.100167	up	novel_circ_003635	-2.02298	down
bta-let-7g	0.100167	up	novel_circ_003863	-2.96941	down
bta-let-7g	0.100167	up	novel_circ_003929	-19.1506	down
bta-miR-10162-5p	0.407572	up	novel_circ_000224	-3.1526	down
bta-miR-10162-5p	0.407572	up	novel_circ_000227	-2.18925	down
bta-miR-10162-5p	0.407572	up	novel_circ_000237	-2.57564	down
bta-miR-10162-5p	0.407572	up	novel_circ_000246	-2.02038	down
bta-miR-11991	1.31715	up	novel_circ_000597	-0.56441	down
bta-miR-10162-5p	0.407572	up	novel_circ_000696	-2.36984	down
bta-miR-1291	2.37518	up	novel_circ_000597	-0.56441	down
bta-miR-10162-5p	0.407572	up	novel_circ_000847	-3.28825	down
bta-miR-10162-5p	0.407572	up	novel_circ_000848	-2.75279	down
bta-miR-10162-5p	0.407572	up	novel_circ_000876	-1.97713	down
bta-miR-10162-5p	0.407572	up	novel_circ_001209	-18.7773	down
bta-miR-10162-5p	0.407572	up	novel_circ_001344	-3.07672	down
bta-miR-10162-5p	0.407572	up	novel_circ_001457	-18.7289	down
bta-miR-10162-5p	0.407572	up	novel_circ_001459	-2.59308	down
bta-miR-10162-5p	0.407572	up	novel_circ_001549	-18.7522	down
bta-miR-10162-5p	0.407572	up	novel_circ_001669	-1.33689	down
bta-miR-10162-5p	0.407572	up	novel_circ_001681	-1.40692	down
bta-miR-10162-5p	0.407572	up	novel_circ_002262	-18.7278	down
bta-miR-10162-5p	0.407572	up	novel_circ_002424	-18.6743	down
bta-miR-10162-5p	0.407572	up	novel_circ_002477	-19.1506	down
bta-miR-10162-5p	0.407572	up	novel_circ_002480	-18.7522	down
bta-miR-10162-5p	0.407572	up	novel_circ_002764	-18.7299	down
bta-miR-10162-5p	0.407572	up	novel_circ_002834	-18.8262	down
bta-miR-10162-5p	0.407572	up	novel_circ_002958	-1.66316	down
bta-miR-10162-5p	0.407572	up	novel_circ_003014	-1.53114	down
bta-miR-10162-5p	0.407572	up	novel_circ_003024	-18.7299	down
bta-miR-10162-5p	0.407572	up	novel_circ_003305	-1.5998	down
bta-miR-10162-5p	0.407572	up	novel_circ_003608	-3.35138	down
bta-miR-10162-5p	0.407572	up	novel_circ_003627	-2.4812	down
bta-miR-10162-5p	0.407572	up	novel_circ_003863	-2.96941	down
bta-miR-10162-5p	0.407572	up	novel_circ_003929	-19.1506	down
bta-miR-10162-5p	0.407572	up	novel_circ_004280	-18.7533	down
bta-miR-10a	0.43081	up	novel_circ_000224	-3.1526	down
bta-miR-10a	0.43081	up	novel_circ_000227	-2.18925	down
bta-miR-10a	0.43081	up	novel_circ_000237	-2.57564	down
bta-miR-10a	0.43081	up	novel_circ_000246	-2.02038	down
bta-miR-1468	0.352992	up	novel_circ_000597	-0.56441	down
bta-miR-10a	0.43081	up	novel_circ_000696	-2.36984	down
bta-miR-10a	0.43081	up	novel_circ_000704	-19.091	down
bta-miR-146b	0.432793	up	novel_circ_000597	-0.56441	down
bta-miR-10a	0.43081	up	novel_circ_000844	-19.0959	down
bta-miR-10a	0.43081	up	novel_circ_000847	-3.28825	down
bta-miR-10a	0.43081	up	novel_circ_000848	-2.75279	down
bta-miR-10a	0.43081	up	novel_circ_000876	-1.97713	down
bta-miR-10a	0.43081	up	novel_circ_001043	-1.08228	down
bta-miR-10a	0.43081	up	novel_circ_001209	-18.7773	down
bta-miR-10a	0.43081	up	novel_circ_001267	-19.6809	down
bta-miR-10a	0.43081	up	novel_circ_001300	-18.6765	down
bta-miR-10a	0.43081	up	novel_circ_001344	-3.07672	down
bta-miR-10a	0.43081	up	novel_circ_001457	-18.7289	down
bta-miR-10a	0.43081	up	novel_circ_001459	-2.59308	down
bta-miR-10a	0.43081	up	novel_circ_001533	-2.0915	down
bta-miR-10a	0.43081	up	novel_circ_001549	-18.7522	down
bta-miR-10a	0.43081	up	novel_circ_001669	-1.33689	down
bta-miR-10a	0.43081	up	novel_circ_001681	-1.40692	down
bta-miR-10a	0.43081	up	novel_circ_002262	-18.7278	down
bta-miR-10a	0.43081	up	novel_circ_002379	-19.0959	down
bta-miR-10a	0.43081	up	novel_circ_002424	-18.6743	down
bta-miR-10a	0.43081	up	novel_circ_002475	-18.6743	down
bta-miR-10a	0.43081	up	novel_circ_002477	-19.1506	down
bta-miR-10a	0.43081	up	novel_circ_002480	-18.7522	down
bta-miR-10a	0.43081	up	novel_circ_002745	-18.6809	down
bta-miR-10a	0.43081	up	novel_circ_002764	-18.7299	down
bta-miR-10a	0.43081	up	novel_circ_002790	-18.6743	down
bta-miR-10a	0.43081	up	novel_circ_002834	-18.8262	down
bta-miR-10a	0.43081	up	novel_circ_002958	-1.66316	down
bta-miR-10a	0.43081	up	novel_circ_003014	-1.53114	down
bta-miR-10a	0.43081	up	novel_circ_003024	-18.7299	down
bta-miR-10a	0.43081	up	novel_circ_003156	-18.8986	down
bta-miR-10a	0.43081	up	novel_circ_003262	-3.45725	down
bta-miR-10a	0.43081	up	novel_circ_003305	-1.5998	down
bta-miR-10a	0.43081	up	novel_circ_003608	-3.35138	down
bta-miR-10a	0.43081	up	novel_circ_003627	-2.4812	down
bta-miR-10a	0.43081	up	novel_circ_003635	-2.02298	down
bta-miR-10a	0.43081	up	novel_circ_003863	-2.96941	down
bta-miR-10a	0.43081	up	novel_circ_003929	-19.1506	down
bta-miR-10a	0.43081	up	novel_circ_004280	-18.7533	down
bta-miR-10b	0.220867	up	novel_circ_000224	-3.1526	down
bta-miR-10b	0.220867	up	novel_circ_000227	-2.18925	down
bta-miR-10b	0.220867	up	novel_circ_000237	-2.57564	down
bta-miR-148a	0.104476	up	novel_circ_000597	-0.56441	down
bta-miR-10b	0.220867	up	novel_circ_000696	-2.36984	down
bta-miR-10b	0.220867	up	novel_circ_000704	-19.091	down
bta-miR-181b	0.306306	up	novel_circ_000597	-0.56441	down
bta-miR-10b	0.220867	up	novel_circ_000844	-19.0959	down
bta-miR-10b	0.220867	up	novel_circ_000847	-3.28825	down
bta-miR-10b	0.220867	up	novel_circ_000848	-2.75279	down
bta-miR-10b	0.220867	up	novel_circ_000876	-1.97713	down
bta-miR-10b	0.220867	up	novel_circ_001043	-1.08228	down
bta-miR-10b	0.220867	up	novel_circ_001209	-18.7773	down
bta-miR-10b	0.220867	up	novel_circ_001300	-18.6765	down
bta-miR-10b	0.220867	up	novel_circ_001344	-3.07672	down
bta-miR-10b	0.220867	up	novel_circ_001457	-18.7289	down
bta-miR-10b	0.220867	up	novel_circ_001459	-2.59308	down
bta-miR-10b	0.220867	up	novel_circ_001533	-2.0915	down
bta-miR-10b	0.220867	up	novel_circ_001549	-18.7522	down
bta-miR-10b	0.220867	up	novel_circ_001669	-1.33689	down
bta-miR-10b	0.220867	up	novel_circ_001681	-1.40692	down
bta-miR-10b	0.220867	up	novel_circ_002262	-18.7278	down
bta-miR-10b	0.220867	up	novel_circ_002379	-19.0959	down
bta-miR-10b	0.220867	up	novel_circ_002424	-18.6743	down
bta-miR-10b	0.220867	up	novel_circ_002475	-18.6743	down
bta-miR-10b	0.220867	up	novel_circ_002477	-19.1506	down
bta-miR-10b	0.220867	up	novel_circ_002480	-18.7522	down
bta-miR-10b	0.220867	up	novel_circ_002764	-18.7299	down
bta-miR-10b	0.220867	up	novel_circ_002790	-18.6743	down
bta-miR-10b	0.220867	up	novel_circ_002834	-18.8262	down
bta-miR-10b	0.220867	up	novel_circ_002958	-1.66316	down
bta-miR-10b	0.220867	up	novel_circ_003014	-1.53114	down
bta-miR-10b	0.220867	up	novel_circ_003024	-18.7299	down
bta-miR-10b	0.220867	up	novel_circ_003156	-18.8986	down
bta-miR-10b	0.220867	up	novel_circ_003262	-3.45725	down
bta-miR-10b	0.220867	up	novel_circ_003608	-3.35138	down
bta-miR-10b	0.220867	up	novel_circ_003627	-2.4812	down
bta-miR-10b	0.220867	up	novel_circ_003635	-2.02298	down
bta-miR-10b	0.220867	up	novel_circ_003929	-19.1506	down
bta-miR-10b	0.220867	up	novel_circ_004280	-18.7533	down
bta-miR-11991	1.31715	up	novel_circ_000224	-3.1526	down
bta-miR-11991	1.31715	up	novel_circ_000227	-2.18925	down
bta-miR-11991	1.31715	up	novel_circ_000237	-2.57564	down
bta-miR-11991	1.31715	up	novel_circ_000246	-2.02038	down
bta-miR-181c	1.31277	up	novel_circ_000597	-0.56441	down
bta-miR-11991	1.31715	up	novel_circ_000696	-2.36984	down
bta-miR-11991	1.31715	up	novel_circ_000704	-19.091	down
bta-miR-182	0.377445	up	novel_circ_000597	-0.56441	down
bta-miR-11991	1.31715	up	novel_circ_000847	-3.28825	down
bta-miR-11991	1.31715	up	novel_circ_000848	-2.75279	down
bta-miR-11991	1.31715	up	novel_circ_000876	-1.97713	down
bta-miR-11991	1.31715	up	novel_circ_001043	-1.08228	down
bta-miR-11991	1.31715	up	novel_circ_001209	-18.7773	down
bta-miR-11991	1.31715	up	novel_circ_001300	-18.6765	down
bta-miR-11991	1.31715	up	novel_circ_001344	-3.07672	down
bta-miR-11991	1.31715	up	novel_circ_001457	-18.7289	down
bta-miR-11991	1.31715	up	novel_circ_001459	-2.59308	down
bta-miR-11991	1.31715	up	novel_circ_001533	-2.0915	down
bta-miR-11991	1.31715	up	novel_circ_001549	-18.7522	down
bta-miR-11991	1.31715	up	novel_circ_001669	-1.33689	down
bta-miR-11991	1.31715	up	novel_circ_001681	-1.40692	down
bta-miR-11991	1.31715	up	novel_circ_002262	-18.7278	down
bta-miR-11991	1.31715	up	novel_circ_002424	-18.6743	down
bta-miR-11991	1.31715	up	novel_circ_002475	-18.6743	down
bta-miR-11991	1.31715	up	novel_circ_002477	-19.1506	down
bta-miR-11991	1.31715	up	novel_circ_002480	-18.7522	down
bta-miR-11991	1.31715	up	novel_circ_002764	-18.7299	down
bta-miR-11991	1.31715	up	novel_circ_002790	-18.6743	down
bta-miR-11991	1.31715	up	novel_circ_002834	-18.8262	down
bta-miR-11991	1.31715	up	novel_circ_002958	-1.66316	down
bta-miR-11991	1.31715	up	novel_circ_003014	-1.53114	down
bta-miR-11991	1.31715	up	novel_circ_003024	-18.7299	down
bta-miR-11991	1.31715	up	novel_circ_003156	-18.8986	down
bta-miR-11991	1.31715	up	novel_circ_003262	-3.45725	down
bta-miR-11991	1.31715	up	novel_circ_003305	-1.5998	down
bta-miR-11991	1.31715	up	novel_circ_003608	-3.35138	down
bta-miR-11991	1.31715	up	novel_circ_003627	-2.4812	down
bta-miR-11991	1.31715	up	novel_circ_003635	-2.02298	down
bta-miR-11991	1.31715	up	novel_circ_003863	-2.96941	down
bta-miR-11991	1.31715	up	novel_circ_003867	-0.69489	down
bta-miR-11991	1.31715	up	novel_circ_003929	-19.1506	down
bta-miR-11991	1.31715	up	novel_circ_004280	-18.7533	down
bta-miR-1291	2.37518	up	novel_circ_000224	-3.1526	down
bta-miR-1291	2.37518	up	novel_circ_000227	-2.18925	down
bta-miR-1291	2.37518	up	novel_circ_000237	-2.57564	down
bta-miR-1291	2.37518	up	novel_circ_000246	-2.02038	down
bta-miR-183	0.572909	up	novel_circ_000597	-0.56441	down
bta-miR-1291	2.37518	up	novel_circ_000696	-2.36984	down
bta-miR-1291	2.37518	up	novel_circ_000704	-19.091	down
bta-miR-191	0.393459	up	novel_circ_000597	-0.56441	down
bta-miR-1291	2.37518	up	novel_circ_000844	-19.0959	down
bta-miR-1291	2.37518	up	novel_circ_000847	-3.28825	down
bta-miR-1291	2.37518	up	novel_circ_000848	-2.75279	down
bta-miR-1291	2.37518	up	novel_circ_000876	-1.97713	down
bta-miR-1291	2.37518	up	novel_circ_001043	-1.08228	down
bta-miR-1291	2.37518	up	novel_circ_001209	-18.7773	down
bta-miR-1291	2.37518	up	novel_circ_001267	-19.6809	down
bta-miR-1291	2.37518	up	novel_circ_001300	-18.6765	down
bta-miR-1291	2.37518	up	novel_circ_001344	-3.07672	down
bta-miR-1291	2.37518	up	novel_circ_001457	-18.7289	down
bta-miR-1291	2.37518	up	novel_circ_001459	-2.59308	down
bta-miR-1291	2.37518	up	novel_circ_001533	-2.0915	down
bta-miR-1291	2.37518	up	novel_circ_001549	-18.7522	down
bta-miR-1291	2.37518	up	novel_circ_001669	-1.33689	down
bta-miR-1291	2.37518	up	novel_circ_001681	-1.40692	down
bta-miR-1291	2.37518	up	novel_circ_002262	-18.7278	down
bta-miR-1291	2.37518	up	novel_circ_002379	-19.0959	down
bta-miR-1291	2.37518	up	novel_circ_002424	-18.6743	down
bta-miR-1291	2.37518	up	novel_circ_002475	-18.6743	down
bta-miR-1291	2.37518	up	novel_circ_002477	-19.1506	down
bta-miR-1291	2.37518	up	novel_circ_002480	-18.7522	down
bta-miR-1291	2.37518	up	novel_circ_002745	-18.6809	down
bta-miR-1291	2.37518	up	novel_circ_002764	-18.7299	down
bta-miR-1291	2.37518	up	novel_circ_002790	-18.6743	down
bta-miR-1291	2.37518	up	novel_circ_002834	-18.8262	down
bta-miR-1291	2.37518	up	novel_circ_002958	-1.66316	down
bta-miR-1291	2.37518	up	novel_circ_003014	-1.53114	down
bta-miR-1291	2.37518	up	novel_circ_003024	-18.7299	down
bta-miR-1291	2.37518	up	novel_circ_003156	-18.8986	down
bta-miR-1291	2.37518	up	novel_circ_003262	-3.45725	down
bta-miR-1291	2.37518	up	novel_circ_003305	-1.5998	down
bta-miR-1291	2.37518	up	novel_circ_003608	-3.35138	down
bta-miR-1291	2.37518	up	novel_circ_003627	-2.4812	down
bta-miR-1291	2.37518	up	novel_circ_003635	-2.02298	down
bta-miR-1291	2.37518	up	novel_circ_003863	-2.96941	down
bta-miR-1291	2.37518	up	novel_circ_003867	-0.69489	down
bta-miR-1291	2.37518	up	novel_circ_003929	-19.1506	down
bta-miR-1291	2.37518	up	novel_circ_004280	-18.7533	down
bta-miR-1468	0.352992	up	novel_circ_000224	-3.1526	down
bta-miR-1468	0.352992	up	novel_circ_000227	-2.18925	down
bta-miR-1468	0.352992	up	novel_circ_000237	-2.57564	down
bta-miR-1468	0.352992	up	novel_circ_000246	-2.02038	down
bta-miR-192	0.22331	up	novel_circ_000597	-0.56441	down
bta-miR-1468	0.352992	up	novel_circ_000696	-2.36984	down
bta-miR-1468	0.352992	up	novel_circ_000704	-19.091	down
bta-miR-193a-5p	0.354289	up	novel_circ_000597	-0.56441	down
bta-miR-1468	0.352992	up	novel_circ_000844	-19.0959	down
bta-miR-1468	0.352992	up	novel_circ_000847	-3.28825	down
bta-miR-1468	0.352992	up	novel_circ_000848	-2.75279	down
bta-miR-1468	0.352992	up	novel_circ_000876	-1.97713	down
bta-miR-1468	0.352992	up	novel_circ_001043	-1.08228	down
bta-miR-1468	0.352992	up	novel_circ_001209	-18.7773	down
bta-miR-1468	0.352992	up	novel_circ_001267	-19.6809	down
bta-miR-1468	0.352992	up	novel_circ_001300	-18.6765	down
bta-miR-1468	0.352992	up	novel_circ_001344	-3.07672	down
bta-miR-1468	0.352992	up	novel_circ_001457	-18.7289	down
bta-miR-1468	0.352992	up	novel_circ_001459	-2.59308	down
bta-miR-1468	0.352992	up	novel_circ_001533	-2.0915	down
bta-miR-1468	0.352992	up	novel_circ_001549	-18.7522	down
bta-miR-1468	0.352992	up	novel_circ_001669	-1.33689	down
bta-miR-1468	0.352992	up	novel_circ_001681	-1.40692	down
bta-miR-1468	0.352992	up	novel_circ_002262	-18.7278	down
bta-miR-1468	0.352992	up	novel_circ_002379	-19.0959	down
bta-miR-1468	0.352992	up	novel_circ_002424	-18.6743	down
bta-miR-1468	0.352992	up	novel_circ_002477	-19.1506	down
bta-miR-1468	0.352992	up	novel_circ_002480	-18.7522	down
bta-miR-1468	0.352992	up	novel_circ_002745	-18.6809	down
bta-miR-1468	0.352992	up	novel_circ_002764	-18.7299	down
bta-miR-1468	0.352992	up	novel_circ_002834	-18.8262	down
bta-miR-1468	0.352992	up	novel_circ_002958	-1.66316	down
bta-miR-1468	0.352992	up	novel_circ_003014	-1.53114	down
bta-miR-1468	0.352992	up	novel_circ_003024	-18.7299	down
bta-miR-1468	0.352992	up	novel_circ_003156	-18.8986	down
bta-miR-1468	0.352992	up	novel_circ_003262	-3.45725	down
bta-miR-1468	0.352992	up	novel_circ_003305	-1.5998	down
bta-miR-1468	0.352992	up	novel_circ_003608	-3.35138	down
bta-miR-1468	0.352992	up	novel_circ_003635	-2.02298	down
bta-miR-1468	0.352992	up	novel_circ_003863	-2.96941	down
bta-miR-1468	0.352992	up	novel_circ_003929	-19.1506	down
bta-miR-1468	0.352992	up	novel_circ_004280	-18.7533	down
bta-miR-146b	0.432793	up	novel_circ_000224	-3.1526	down
bta-miR-146b	0.432793	up	novel_circ_000227	-2.18925	down
bta-miR-146b	0.432793	up	novel_circ_000237	-2.57564	down
bta-miR-146b	0.432793	up	novel_circ_000246	-2.02038	down
bta-miR-1949	0.73694	up	novel_circ_000597	-0.56441	down
bta-miR-146b	0.432793	up	novel_circ_000696	-2.36984	down
bta-miR-146b	0.432793	up	novel_circ_000704	-19.091	down
bta-miR-196a	0.417513	up	novel_circ_000597	-0.56441	down
bta-miR-146b	0.432793	up	novel_circ_000844	-19.0959	down
bta-miR-146b	0.432793	up	novel_circ_000847	-3.28825	down
bta-miR-146b	0.432793	up	novel_circ_000848	-2.75279	down
bta-miR-146b	0.432793	up	novel_circ_000876	-1.97713	down
bta-miR-146b	0.432793	up	novel_circ_001043	-1.08228	down
bta-miR-146b	0.432793	up	novel_circ_001209	-18.7773	down
bta-miR-146b	0.432793	up	novel_circ_001267	-19.6809	down
bta-miR-146b	0.432793	up	novel_circ_001300	-18.6765	down
bta-miR-146b	0.432793	up	novel_circ_001344	-3.07672	down
bta-miR-146b	0.432793	up	novel_circ_001457	-18.7289	down
bta-miR-146b	0.432793	up	novel_circ_001459	-2.59308	down
bta-miR-146b	0.432793	up	novel_circ_001533	-2.0915	down
bta-miR-146b	0.432793	up	novel_circ_001549	-18.7522	down
bta-miR-146b	0.432793	up	novel_circ_001669	-1.33689	down
bta-miR-146b	0.432793	up	novel_circ_001681	-1.40692	down
bta-miR-146b	0.432793	up	novel_circ_002262	-18.7278	down
bta-miR-146b	0.432793	up	novel_circ_002379	-19.0959	down
bta-miR-146b	0.432793	up	novel_circ_002424	-18.6743	down
bta-miR-146b	0.432793	up	novel_circ_002475	-18.6743	down
bta-miR-146b	0.432793	up	novel_circ_002477	-19.1506	down
bta-miR-146b	0.432793	up	novel_circ_002480	-18.7522	down
bta-miR-146b	0.432793	up	novel_circ_002745	-18.6809	down
bta-miR-146b	0.432793	up	novel_circ_002764	-18.7299	down
bta-miR-146b	0.432793	up	novel_circ_002790	-18.6743	down
bta-miR-146b	0.432793	up	novel_circ_002834	-18.8262	down
bta-miR-146b	0.432793	up	novel_circ_002958	-1.66316	down
bta-miR-146b	0.432793	up	novel_circ_003014	-1.53114	down
bta-miR-146b	0.432793	up	novel_circ_003024	-18.7299	down
bta-miR-146b	0.432793	up	novel_circ_003156	-18.8986	down
bta-miR-146b	0.432793	up	novel_circ_003262	-3.45725	down
bta-miR-146b	0.432793	up	novel_circ_003305	-1.5998	down
bta-miR-146b	0.432793	up	novel_circ_003608	-3.35138	down
bta-miR-146b	0.432793	up	novel_circ_003627	-2.4812	down
bta-miR-146b	0.432793	up	novel_circ_003635	-2.02298	down
bta-miR-146b	0.432793	up	novel_circ_003863	-2.96941	down
bta-miR-146b	0.432793	up	novel_circ_003929	-19.1506	down
bta-miR-146b	0.432793	up	novel_circ_004280	-18.7533	down
bta-miR-148a	0.104476	up	novel_circ_000224	-3.1526	down
bta-miR-148a	0.104476	up	novel_circ_000227	-2.18925	down
bta-miR-148a	0.104476	up	novel_circ_000237	-2.57564	down
bta-miR-148a	0.104476	up	novel_circ_000246	-2.02038	down
bta-miR-2285k	0.113559	up	novel_circ_000597	-0.56441	down
bta-miR-148a	0.104476	up	novel_circ_000696	-2.36984	down
bta-miR-148a	0.104476	up	novel_circ_000704	-19.091	down
bta-miR-2332	1.5877	up	novel_circ_000597	-0.56441	down
bta-miR-148a	0.104476	up	novel_circ_000844	-19.0959	down
bta-miR-148a	0.104476	up	novel_circ_000847	-3.28825	down
bta-miR-148a	0.104476	up	novel_circ_000848	-2.75279	down
bta-miR-148a	0.104476	up	novel_circ_000876	-1.97713	down
bta-miR-148a	0.104476	up	novel_circ_001043	-1.08228	down
bta-miR-148a	0.104476	up	novel_circ_001209	-18.7773	down
bta-miR-148a	0.104476	up	novel_circ_001267	-19.6809	down
bta-miR-148a	0.104476	up	novel_circ_001300	-18.6765	down
bta-miR-148a	0.104476	up	novel_circ_001344	-3.07672	down
bta-miR-148a	0.104476	up	novel_circ_001457	-18.7289	down
bta-miR-148a	0.104476	up	novel_circ_001459	-2.59308	down
bta-miR-148a	0.104476	up	novel_circ_001549	-18.7522	down
bta-miR-148a	0.104476	up	novel_circ_001669	-1.33689	down
bta-miR-148a	0.104476	up	novel_circ_002262	-18.7278	down
bta-miR-148a	0.104476	up	novel_circ_002379	-19.0959	down
bta-miR-148a	0.104476	up	novel_circ_002424	-18.6743	down
bta-miR-148a	0.104476	up	novel_circ_002475	-18.6743	down
bta-miR-148a	0.104476	up	novel_circ_002477	-19.1506	down
bta-miR-148a	0.104476	up	novel_circ_002480	-18.7522	down
bta-miR-148a	0.104476	up	novel_circ_002745	-18.6809	down
bta-miR-148a	0.104476	up	novel_circ_002764	-18.7299	down
bta-miR-148a	0.104476	up	novel_circ_002790	-18.6743	down
bta-miR-148a	0.104476	up	novel_circ_002958	-1.66316	down
bta-miR-148a	0.104476	up	novel_circ_003014	-1.53114	down
bta-miR-148a	0.104476	up	novel_circ_003024	-18.7299	down
bta-miR-148a	0.104476	up	novel_circ_003156	-18.8986	down
bta-miR-148a	0.104476	up	novel_circ_003262	-3.45725	down
bta-miR-148a	0.104476	up	novel_circ_003305	-1.5998	down
bta-miR-148a	0.104476	up	novel_circ_003608	-3.35138	down
bta-miR-148a	0.104476	up	novel_circ_003627	-2.4812	down
bta-miR-148a	0.104476	up	novel_circ_003635	-2.02298	down
bta-miR-148a	0.104476	up	novel_circ_003863	-2.96941	down
bta-miR-148a	0.104476	up	novel_circ_003867	-0.69489	down
bta-miR-148a	0.104476	up	novel_circ_003929	-19.1506	down
bta-miR-148a	0.104476	up	novel_circ_004280	-18.7533	down
bta-miR-181b	0.306306	up	novel_circ_000224	-3.1526	down
bta-miR-181b	0.306306	up	novel_circ_000227	-2.18925	down
bta-miR-181b	0.306306	up	novel_circ_000237	-2.57564	down
bta-miR-181b	0.306306	up	novel_circ_000246	-2.02038	down
bta-miR-2335	0.408098	up	novel_circ_000597	-0.56441	down
bta-miR-181b	0.306306	up	novel_circ_000696	-2.36984	down
bta-miR-181b	0.306306	up	novel_circ_000704	-19.091	down
bta-miR-2370-5p	5.71608	up	novel_circ_000597	-0.56441	down
bta-miR-181b	0.306306	up	novel_circ_000847	-3.28825	down
bta-miR-181b	0.306306	up	novel_circ_000848	-2.75279	down
bta-miR-181b	0.306306	up	novel_circ_000876	-1.97713	down
bta-miR-181b	0.306306	up	novel_circ_001043	-1.08228	down
bta-miR-181b	0.306306	up	novel_circ_001209	-18.7773	down
bta-miR-181b	0.306306	up	novel_circ_001267	-19.6809	down
bta-miR-181b	0.306306	up	novel_circ_001300	-18.6765	down
bta-miR-181b	0.306306	up	novel_circ_001344	-3.07672	down
bta-miR-181b	0.306306	up	novel_circ_001457	-18.7289	down
bta-miR-181b	0.306306	up	novel_circ_001459	-2.59308	down
bta-miR-181b	0.306306	up	novel_circ_001533	-2.0915	down
bta-miR-181b	0.306306	up	novel_circ_001549	-18.7522	down
bta-miR-181b	0.306306	up	novel_circ_001669	-1.33689	down
bta-miR-181b	0.306306	up	novel_circ_001681	-1.40692	down
bta-miR-181b	0.306306	up	novel_circ_002262	-18.7278	down
bta-miR-181b	0.306306	up	novel_circ_002424	-18.6743	down
bta-miR-181b	0.306306	up	novel_circ_002475	-18.6743	down
bta-miR-181b	0.306306	up	novel_circ_002477	-19.1506	down
bta-miR-181b	0.306306	up	novel_circ_002480	-18.7522	down
bta-miR-181b	0.306306	up	novel_circ_002745	-18.6809	down
bta-miR-181b	0.306306	up	novel_circ_002764	-18.7299	down
bta-miR-181b	0.306306	up	novel_circ_002790	-18.6743	down
bta-miR-181b	0.306306	up	novel_circ_002834	-18.8262	down
bta-miR-181b	0.306306	up	novel_circ_002958	-1.66316	down
bta-miR-181b	0.306306	up	novel_circ_003014	-1.53114	down
bta-miR-181b	0.306306	up	novel_circ_003024	-18.7299	down
bta-miR-181b	0.306306	up	novel_circ_003156	-18.8986	down
bta-miR-181b	0.306306	up	novel_circ_003262	-3.45725	down
bta-miR-181b	0.306306	up	novel_circ_003305	-1.5998	down
bta-miR-181b	0.306306	up	novel_circ_003608	-3.35138	down
bta-miR-181b	0.306306	up	novel_circ_003627	-2.4812	down
bta-miR-181b	0.306306	up	novel_circ_003635	-2.02298	down
bta-miR-181b	0.306306	up	novel_circ_003863	-2.96941	down
bta-miR-181b	0.306306	up	novel_circ_003867	-0.69489	down
bta-miR-181b	0.306306	up	novel_circ_003929	-19.1506	down
bta-miR-181b	0.306306	up	novel_circ_004280	-18.7533	down
bta-miR-181c	1.31277	up	novel_circ_000227	-2.18925	down
bta-miR-181c	1.31277	up	novel_circ_000237	-2.57564	down
bta-miR-181c	1.31277	up	novel_circ_000246	-2.02038	down
bta-miR-2431-3p	0.326879	up	novel_circ_000597	-0.56441	down
bta-miR-181c	1.31277	up	novel_circ_000696	-2.36984	down
bta-miR-30a-5p	0.333408	up	novel_circ_000597	-0.56441	down
bta-miR-181c	1.31277	up	novel_circ_000847	-3.28825	down
bta-miR-181c	1.31277	up	novel_circ_000848	-2.75279	down
bta-miR-181c	1.31277	up	novel_circ_000876	-1.97713	down
bta-miR-181c	1.31277	up	novel_circ_001043	-1.08228	down
bta-miR-181c	1.31277	up	novel_circ_001209	-18.7773	down
bta-miR-181c	1.31277	up	novel_circ_001267	-19.6809	down
bta-miR-181c	1.31277	up	novel_circ_001344	-3.07672	down
bta-miR-181c	1.31277	up	novel_circ_001457	-18.7289	down
bta-miR-181c	1.31277	up	novel_circ_001459	-2.59308	down
bta-miR-181c	1.31277	up	novel_circ_001549	-18.7522	down
bta-miR-181c	1.31277	up	novel_circ_001669	-1.33689	down
bta-miR-181c	1.31277	up	novel_circ_001681	-1.40692	down
bta-miR-181c	1.31277	up	novel_circ_002262	-18.7278	down
bta-miR-181c	1.31277	up	novel_circ_002424	-18.6743	down
bta-miR-181c	1.31277	up	novel_circ_002475	-18.6743	down
bta-miR-181c	1.31277	up	novel_circ_002477	-19.1506	down
bta-miR-181c	1.31277	up	novel_circ_002480	-18.7522	down
bta-miR-181c	1.31277	up	novel_circ_002745	-18.6809	down
bta-miR-181c	1.31277	up	novel_circ_002764	-18.7299	down
bta-miR-181c	1.31277	up	novel_circ_002790	-18.6743	down
bta-miR-181c	1.31277	up	novel_circ_002834	-18.8262	down
bta-miR-181c	1.31277	up	novel_circ_002958	-1.66316	down
bta-miR-181c	1.31277	up	novel_circ_003014	-1.53114	down
bta-miR-181c	1.31277	up	novel_circ_003024	-18.7299	down
bta-miR-181c	1.31277	up	novel_circ_003305	-1.5998	down
bta-miR-181c	1.31277	up	novel_circ_003608	-3.35138	down
bta-miR-181c	1.31277	up	novel_circ_003627	-2.4812	down
bta-miR-181c	1.31277	up	novel_circ_003635	-2.02298	down
bta-miR-181c	1.31277	up	novel_circ_003863	-2.96941	down
bta-miR-181c	1.31277	up	novel_circ_003929	-19.1506	down
bta-miR-181c	1.31277	up	novel_circ_004280	-18.7533	down
bta-miR-182	0.377445	up	novel_circ_000224	-3.1526	down
bta-miR-182	0.377445	up	novel_circ_000227	-2.18925	down
bta-miR-182	0.377445	up	novel_circ_000237	-2.57564	down
bta-miR-182	0.377445	up	novel_circ_000246	-2.02038	down
bta-miR-30e-5p	0.19606	up	novel_circ_000597	-0.56441	down
bta-miR-182	0.377445	up	novel_circ_000696	-2.36984	down
bta-miR-182	0.377445	up	novel_circ_000704	-19.091	down
bta-miR-30f	0.113617	up	novel_circ_000597	-0.56441	down
bta-miR-182	0.377445	up	novel_circ_000844	-19.0959	down
bta-miR-182	0.377445	up	novel_circ_000847	-3.28825	down
bta-miR-182	0.377445	up	novel_circ_000848	-2.75279	down
bta-miR-182	0.377445	up	novel_circ_000876	-1.97713	down
bta-miR-182	0.377445	up	novel_circ_001043	-1.08228	down
bta-miR-182	0.377445	up	novel_circ_001209	-18.7773	down
bta-miR-182	0.377445	up	novel_circ_001267	-19.6809	down
bta-miR-182	0.377445	up	novel_circ_001300	-18.6765	down
bta-miR-182	0.377445	up	novel_circ_001344	-3.07672	down
bta-miR-182	0.377445	up	novel_circ_001457	-18.7289	down
bta-miR-182	0.377445	up	novel_circ_001459	-2.59308	down
bta-miR-182	0.377445	up	novel_circ_001533	-2.0915	down
bta-miR-182	0.377445	up	novel_circ_001549	-18.7522	down
bta-miR-182	0.377445	up	novel_circ_001669	-1.33689	down
bta-miR-182	0.377445	up	novel_circ_001681	-1.40692	down
bta-miR-182	0.377445	up	novel_circ_002262	-18.7278	down
bta-miR-182	0.377445	up	novel_circ_002379	-19.0959	down
bta-miR-182	0.377445	up	novel_circ_002424	-18.6743	down
bta-miR-182	0.377445	up	novel_circ_002475	-18.6743	down
bta-miR-182	0.377445	up	novel_circ_002477	-19.1506	down
bta-miR-182	0.377445	up	novel_circ_002480	-18.7522	down
bta-miR-182	0.377445	up	novel_circ_002745	-18.6809	down
bta-miR-182	0.377445	up	novel_circ_002764	-18.7299	down
bta-miR-182	0.377445	up	novel_circ_002790	-18.6743	down
bta-miR-182	0.377445	up	novel_circ_002834	-18.8262	down
bta-miR-182	0.377445	up	novel_circ_002958	-1.66316	down
bta-miR-182	0.377445	up	novel_circ_003014	-1.53114	down
bta-miR-182	0.377445	up	novel_circ_003024	-18.7299	down
bta-miR-182	0.377445	up	novel_circ_003156	-18.8986	down
bta-miR-182	0.377445	up	novel_circ_003262	-3.45725	down
bta-miR-182	0.377445	up	novel_circ_003305	-1.5998	down
bta-miR-182	0.377445	up	novel_circ_003608	-3.35138	down
bta-miR-182	0.377445	up	novel_circ_003635	-2.02298	down
bta-miR-182	0.377445	up	novel_circ_003863	-2.96941	down
bta-miR-182	0.377445	up	novel_circ_003929	-19.1506	down
bta-miR-182	0.377445	up	novel_circ_004280	-18.7533	down
bta-miR-183	0.572909	up	novel_circ_000224	-3.1526	down
bta-miR-183	0.572909	up	novel_circ_000227	-2.18925	down
bta-miR-183	0.572909	up	novel_circ_000237	-2.57564	down
bta-miR-183	0.572909	up	novel_circ_000246	-2.02038	down
bta-miR-320a	0.62714	up	novel_circ_000597	-0.56441	down
bta-miR-183	0.572909	up	novel_circ_000696	-2.36984	down
bta-miR-183	0.572909	up	novel_circ_000704	-19.091	down
bta-miR-342	0.282089	up	novel_circ_000597	-0.56441	down
bta-miR-183	0.572909	up	novel_circ_000844	-19.0959	down
bta-miR-183	0.572909	up	novel_circ_000847	-3.28825	down
bta-miR-183	0.572909	up	novel_circ_000848	-2.75279	down
bta-miR-183	0.572909	up	novel_circ_000876	-1.97713	down
bta-miR-183	0.572909	up	novel_circ_001043	-1.08228	down
bta-miR-183	0.572909	up	novel_circ_001209	-18.7773	down
bta-miR-183	0.572909	up	novel_circ_001267	-19.6809	down
bta-miR-183	0.572909	up	novel_circ_001300	-18.6765	down
bta-miR-183	0.572909	up	novel_circ_001344	-3.07672	down
bta-miR-183	0.572909	up	novel_circ_001457	-18.7289	down
bta-miR-183	0.572909	up	novel_circ_001459	-2.59308	down
bta-miR-183	0.572909	up	novel_circ_001533	-2.0915	down
bta-miR-183	0.572909	up	novel_circ_001549	-18.7522	down
bta-miR-183	0.572909	up	novel_circ_001669	-1.33689	down
bta-miR-183	0.572909	up	novel_circ_001681	-1.40692	down
bta-miR-183	0.572909	up	novel_circ_002262	-18.7278	down
bta-miR-183	0.572909	up	novel_circ_002379	-19.0959	down
bta-miR-183	0.572909	up	novel_circ_002424	-18.6743	down
bta-miR-183	0.572909	up	novel_circ_002475	-18.6743	down
bta-miR-183	0.572909	up	novel_circ_002477	-19.1506	down
bta-miR-183	0.572909	up	novel_circ_002480	-18.7522	down
bta-miR-183	0.572909	up	novel_circ_002745	-18.6809	down
bta-miR-183	0.572909	up	novel_circ_002764	-18.7299	down
bta-miR-183	0.572909	up	novel_circ_002790	-18.6743	down
bta-miR-183	0.572909	up	novel_circ_002834	-18.8262	down
bta-miR-183	0.572909	up	novel_circ_002958	-1.66316	down
bta-miR-183	0.572909	up	novel_circ_003014	-1.53114	down
bta-miR-183	0.572909	up	novel_circ_003024	-18.7299	down
bta-miR-183	0.572909	up	novel_circ_003156	-18.8986	down
bta-miR-183	0.572909	up	novel_circ_003262	-3.45725	down
bta-miR-183	0.572909	up	novel_circ_003305	-1.5998	down
bta-miR-183	0.572909	up	novel_circ_003608	-3.35138	down
bta-miR-183	0.572909	up	novel_circ_003627	-2.4812	down
bta-miR-183	0.572909	up	novel_circ_003635	-2.02298	down
bta-miR-183	0.572909	up	novel_circ_003863	-2.96941	down
bta-miR-183	0.572909	up	novel_circ_003929	-19.1506	down
bta-miR-183	0.572909	up	novel_circ_004280	-18.7533	down
bta-miR-191	0.393459	up	novel_circ_000224	-3.1526	down
bta-miR-191	0.393459	up	novel_circ_000227	-2.18925	down
bta-miR-191	0.393459	up	novel_circ_000237	-2.57564	down
bta-miR-191	0.393459	up	novel_circ_000246	-2.02038	down
bta-miR-3432a	0.496315	up	novel_circ_000597	-0.56441	down
bta-miR-191	0.393459	up	novel_circ_000696	-2.36984	down
bta-miR-191	0.393459	up	novel_circ_000704	-19.091	down
bta-miR-425-5p	0.13152	up	novel_circ_000597	-0.56441	down
bta-miR-191	0.393459	up	novel_circ_000844	-19.0959	down
bta-miR-191	0.393459	up	novel_circ_000847	-3.28825	down
bta-miR-191	0.393459	up	novel_circ_000848	-2.75279	down
bta-miR-191	0.393459	up	novel_circ_000876	-1.97713	down
bta-miR-191	0.393459	up	novel_circ_001043	-1.08228	down
bta-miR-191	0.393459	up	novel_circ_001209	-18.7773	down
bta-miR-191	0.393459	up	novel_circ_001267	-19.6809	down
bta-miR-191	0.393459	up	novel_circ_001300	-18.6765	down
bta-miR-191	0.393459	up	novel_circ_001344	-3.07672	down
bta-miR-191	0.393459	up	novel_circ_001457	-18.7289	down
bta-miR-191	0.393459	up	novel_circ_001459	-2.59308	down
bta-miR-191	0.393459	up	novel_circ_001533	-2.0915	down
bta-miR-191	0.393459	up	novel_circ_001549	-18.7522	down
bta-miR-191	0.393459	up	novel_circ_001669	-1.33689	down
bta-miR-191	0.393459	up	novel_circ_001681	-1.40692	down
bta-miR-191	0.393459	up	novel_circ_002262	-18.7278	down
bta-miR-191	0.393459	up	novel_circ_002379	-19.0959	down
bta-miR-191	0.393459	up	novel_circ_002424	-18.6743	down
bta-miR-191	0.393459	up	novel_circ_002477	-19.1506	down
bta-miR-191	0.393459	up	novel_circ_002480	-18.7522	down
bta-miR-191	0.393459	up	novel_circ_002745	-18.6809	down
bta-miR-191	0.393459	up	novel_circ_002764	-18.7299	down
bta-miR-191	0.393459	up	novel_circ_002834	-18.8262	down
bta-miR-191	0.393459	up	novel_circ_002958	-1.66316	down
bta-miR-191	0.393459	up	novel_circ_003014	-1.53114	down
bta-miR-191	0.393459	up	novel_circ_003024	-18.7299	down
bta-miR-191	0.393459	up	novel_circ_003156	-18.8986	down
bta-miR-191	0.393459	up	novel_circ_003262	-3.45725	down
bta-miR-191	0.393459	up	novel_circ_003305	-1.5998	down
bta-miR-191	0.393459	up	novel_circ_003608	-3.35138	down
bta-miR-191	0.393459	up	novel_circ_003627	-2.4812	down
bta-miR-191	0.393459	up	novel_circ_003635	-2.02298	down
bta-miR-191	0.393459	up	novel_circ_003863	-2.96941	down
bta-miR-191	0.393459	up	novel_circ_003929	-19.1506	down
bta-miR-191	0.393459	up	novel_circ_004280	-18.7533	down
bta-miR-192	0.22331	up	novel_circ_000227	-2.18925	down
bta-miR-192	0.22331	up	novel_circ_000237	-2.57564	down
bta-miR-192	0.22331	up	novel_circ_000246	-2.02038	down
bta-miR-574	0.852636	up	novel_circ_000597	-0.56441	down
bta-miR-192	0.22331	up	novel_circ_000696	-2.36984	down
bta-miR-192	0.22331	up	novel_circ_000704	-19.091	down
bta-miR-6535	1.89011	up	novel_circ_000597	-0.56441	down
bta-miR-192	0.22331	up	novel_circ_000847	-3.28825	down
bta-miR-192	0.22331	up	novel_circ_000848	-2.75279	down
bta-miR-192	0.22331	up	novel_circ_000876	-1.97713	down
bta-miR-192	0.22331	up	novel_circ_001043	-1.08228	down
bta-miR-192	0.22331	up	novel_circ_001209	-18.7773	down
bta-miR-192	0.22331	up	novel_circ_001267	-19.6809	down
bta-miR-192	0.22331	up	novel_circ_001300	-18.6765	down
bta-miR-192	0.22331	up	novel_circ_001344	-3.07672	down
bta-miR-192	0.22331	up	novel_circ_001457	-18.7289	down
bta-miR-192	0.22331	up	novel_circ_001459	-2.59308	down
bta-miR-192	0.22331	up	novel_circ_001533	-2.0915	down
bta-miR-192	0.22331	up	novel_circ_001549	-18.7522	down
bta-miR-192	0.22331	up	novel_circ_001669	-1.33689	down
bta-miR-192	0.22331	up	novel_circ_001681	-1.40692	down
bta-miR-192	0.22331	up	novel_circ_002262	-18.7278	down
bta-miR-192	0.22331	up	novel_circ_002424	-18.6743	down
bta-miR-192	0.22331	up	novel_circ_002475	-18.6743	down
bta-miR-192	0.22331	up	novel_circ_002477	-19.1506	down
bta-miR-192	0.22331	up	novel_circ_002480	-18.7522	down
bta-miR-192	0.22331	up	novel_circ_002745	-18.6809	down
bta-miR-192	0.22331	up	novel_circ_002764	-18.7299	down
bta-miR-192	0.22331	up	novel_circ_002790	-18.6743	down
bta-miR-192	0.22331	up	novel_circ_002834	-18.8262	down
bta-miR-192	0.22331	up	novel_circ_002958	-1.66316	down
bta-miR-192	0.22331	up	novel_circ_003014	-1.53114	down
bta-miR-192	0.22331	up	novel_circ_003024	-18.7299	down
bta-miR-192	0.22331	up	novel_circ_003156	-18.8986	down
bta-miR-192	0.22331	up	novel_circ_003262	-3.45725	down
bta-miR-192	0.22331	up	novel_circ_003305	-1.5998	down
bta-miR-192	0.22331	up	novel_circ_003608	-3.35138	down
bta-miR-192	0.22331	up	novel_circ_003635	-2.02298	down
bta-miR-192	0.22331	up	novel_circ_003863	-2.96941	down
bta-miR-192	0.22331	up	novel_circ_003929	-19.1506	down
bta-miR-192	0.22331	up	novel_circ_004280	-18.7533	down
bta-miR-193a-5p	0.354289	up	novel_circ_000224	-3.1526	down
bta-miR-193a-5p	0.354289	up	novel_circ_000227	-2.18925	down
bta-miR-193a-5p	0.354289	up	novel_circ_000237	-2.57564	down
bta-miR-193a-5p	0.354289	up	novel_circ_000246	-2.02038	down
bta-miR-671	0.708016	up	novel_circ_000597	-0.56441	down
bta-miR-193a-5p	0.354289	up	novel_circ_000696	-2.36984	down
bta-miR-769	0.173028	up	novel_circ_000597	-0.56441	down
bta-miR-193a-5p	0.354289	up	novel_circ_000847	-3.28825	down
bta-miR-193a-5p	0.354289	up	novel_circ_000848	-2.75279	down
bta-miR-193a-5p	0.354289	up	novel_circ_000876	-1.97713	down
bta-miR-193a-5p	0.354289	up	novel_circ_001043	-1.08228	down
bta-miR-193a-5p	0.354289	up	novel_circ_001209	-18.7773	down
bta-miR-193a-5p	0.354289	up	novel_circ_001267	-19.6809	down
bta-miR-193a-5p	0.354289	up	novel_circ_001344	-3.07672	down
bta-miR-193a-5p	0.354289	up	novel_circ_001457	-18.7289	down
bta-miR-193a-5p	0.354289	up	novel_circ_001459	-2.59308	down
bta-miR-193a-5p	0.354289	up	novel_circ_001549	-18.7522	down
bta-miR-193a-5p	0.354289	up	novel_circ_001669	-1.33689	down
bta-miR-193a-5p	0.354289	up	novel_circ_001681	-1.40692	down
bta-miR-193a-5p	0.354289	up	novel_circ_002262	-18.7278	down
bta-miR-193a-5p	0.354289	up	novel_circ_002424	-18.6743	down
bta-miR-193a-5p	0.354289	up	novel_circ_002477	-19.1506	down
bta-miR-193a-5p	0.354289	up	novel_circ_002480	-18.7522	down
bta-miR-193a-5p	0.354289	up	novel_circ_002745	-18.6809	down
bta-miR-193a-5p	0.354289	up	novel_circ_002764	-18.7299	down
bta-miR-193a-5p	0.354289	up	novel_circ_002834	-18.8262	down
bta-miR-193a-5p	0.354289	up	novel_circ_002958	-1.66316	down
bta-miR-193a-5p	0.354289	up	novel_circ_003014	-1.53114	down
bta-miR-193a-5p	0.354289	up	novel_circ_003024	-18.7299	down
bta-miR-193a-5p	0.354289	up	novel_circ_003305	-1.5998	down
bta-miR-193a-5p	0.354289	up	novel_circ_003608	-3.35138	down
bta-miR-193a-5p	0.354289	up	novel_circ_003627	-2.4812	down
bta-miR-193a-5p	0.354289	up	novel_circ_003635	-2.02298	down
bta-miR-193a-5p	0.354289	up	novel_circ_003863	-2.96941	down
bta-miR-193a-5p	0.354289	up	novel_circ_003929	-19.1506	down
bta-miR-193a-5p	0.354289	up	novel_circ_004280	-18.7533	down
bta-miR-1949	0.73694	up	novel_circ_000224	-3.1526	down
bta-miR-1949	0.73694	up	novel_circ_000227	-2.18925	down
bta-miR-1949	0.73694	up	novel_circ_000237	-2.57564	down
bta-miR-1949	0.73694	up	novel_circ_000246	-2.02038	down
bta-miR-92b	0.256806	up	novel_circ_000597	-0.56441	down
bta-miR-1949	0.73694	up	novel_circ_000696	-2.36984	down
bta-miR-1949	0.73694	up	novel_circ_000704	-19.091	down
bta-let-7a-5p	0.474666	up	novel_circ_000720	-3.51288	down
bta-miR-1949	0.73694	up	novel_circ_000844	-19.0959	down
bta-miR-1949	0.73694	up	novel_circ_000847	-3.28825	down
bta-miR-1949	0.73694	up	novel_circ_000848	-2.75279	down
bta-miR-1949	0.73694	up	novel_circ_000876	-1.97713	down
bta-miR-1949	0.73694	up	novel_circ_001043	-1.08228	down
bta-miR-1949	0.73694	up	novel_circ_001209	-18.7773	down
bta-miR-1949	0.73694	up	novel_circ_001267	-19.6809	down
bta-miR-1949	0.73694	up	novel_circ_001300	-18.6765	down
bta-miR-1949	0.73694	up	novel_circ_001344	-3.07672	down
bta-miR-1949	0.73694	up	novel_circ_001457	-18.7289	down
bta-miR-1949	0.73694	up	novel_circ_001459	-2.59308	down
bta-miR-1949	0.73694	up	novel_circ_001533	-2.0915	down
bta-miR-1949	0.73694	up	novel_circ_001549	-18.7522	down
bta-miR-1949	0.73694	up	novel_circ_001669	-1.33689	down
bta-miR-1949	0.73694	up	novel_circ_001681	-1.40692	down
bta-miR-1949	0.73694	up	novel_circ_002262	-18.7278	down
bta-miR-1949	0.73694	up	novel_circ_002379	-19.0959	down
bta-miR-1949	0.73694	up	novel_circ_002424	-18.6743	down
bta-miR-1949	0.73694	up	novel_circ_002475	-18.6743	down
bta-miR-1949	0.73694	up	novel_circ_002477	-19.1506	down
bta-miR-1949	0.73694	up	novel_circ_002480	-18.7522	down
bta-miR-1949	0.73694	up	novel_circ_002745	-18.6809	down
bta-miR-1949	0.73694	up	novel_circ_002764	-18.7299	down
bta-miR-1949	0.73694	up	novel_circ_002790	-18.6743	down
bta-miR-1949	0.73694	up	novel_circ_002834	-18.8262	down
bta-miR-1949	0.73694	up	novel_circ_002958	-1.66316	down
bta-miR-1949	0.73694	up	novel_circ_003014	-1.53114	down
bta-miR-1949	0.73694	up	novel_circ_003024	-18.7299	down
bta-miR-1949	0.73694	up	novel_circ_003156	-18.8986	down
bta-miR-1949	0.73694	up	novel_circ_003262	-3.45725	down
bta-miR-1949	0.73694	up	novel_circ_003305	-1.5998	down
bta-miR-1949	0.73694	up	novel_circ_003608	-3.35138	down
bta-miR-1949	0.73694	up	novel_circ_003627	-2.4812	down
bta-miR-1949	0.73694	up	novel_circ_003635	-2.02298	down
bta-miR-1949	0.73694	up	novel_circ_003863	-2.96941	down
bta-miR-1949	0.73694	up	novel_circ_003867	-0.69489	down
bta-miR-1949	0.73694	up	novel_circ_003929	-19.1506	down
bta-miR-1949	0.73694	up	novel_circ_004280	-18.7533	down
bta-miR-196a	0.417513	up	novel_circ_000224	-3.1526	down
bta-miR-196a	0.417513	up	novel_circ_000227	-2.18925	down
bta-miR-196a	0.417513	up	novel_circ_000237	-2.57564	down
bta-miR-196a	0.417513	up	novel_circ_000246	-2.02038	down
bta-let-7b	0.85716	up	novel_circ_000720	-3.51288	down
bta-miR-196a	0.417513	up	novel_circ_000696	-2.36984	down
bta-let-7e	0.260966	up	novel_circ_000720	-3.51288	down
bta-miR-196a	0.417513	up	novel_circ_000847	-3.28825	down
bta-miR-196a	0.417513	up	novel_circ_000848	-2.75279	down
bta-miR-196a	0.417513	up	novel_circ_000876	-1.97713	down
bta-miR-196a	0.417513	up	novel_circ_001043	-1.08228	down
bta-miR-196a	0.417513	up	novel_circ_001209	-18.7773	down
bta-miR-196a	0.417513	up	novel_circ_001267	-19.6809	down
bta-miR-196a	0.417513	up	novel_circ_001344	-3.07672	down
bta-miR-196a	0.417513	up	novel_circ_001457	-18.7289	down
bta-miR-196a	0.417513	up	novel_circ_001459	-2.59308	down
bta-miR-196a	0.417513	up	novel_circ_001549	-18.7522	down
bta-miR-196a	0.417513	up	novel_circ_001669	-1.33689	down
bta-miR-196a	0.417513	up	novel_circ_001681	-1.40692	down
bta-miR-196a	0.417513	up	novel_circ_002262	-18.7278	down
bta-miR-196a	0.417513	up	novel_circ_002424	-18.6743	down
bta-miR-196a	0.417513	up	novel_circ_002477	-19.1506	down
bta-miR-196a	0.417513	up	novel_circ_002480	-18.7522	down
bta-miR-196a	0.417513	up	novel_circ_002745	-18.6809	down
bta-miR-196a	0.417513	up	novel_circ_002764	-18.7299	down
bta-miR-196a	0.417513	up	novel_circ_002834	-18.8262	down
bta-miR-196a	0.417513	up	novel_circ_002958	-1.66316	down
bta-miR-196a	0.417513	up	novel_circ_003014	-1.53114	down
bta-miR-196a	0.417513	up	novel_circ_003024	-18.7299	down
bta-miR-196a	0.417513	up	novel_circ_003305	-1.5998	down
bta-miR-196a	0.417513	up	novel_circ_003608	-3.35138	down
bta-miR-196a	0.417513	up	novel_circ_003635	-2.02298	down
bta-miR-196a	0.417513	up	novel_circ_003863	-2.96941	down
bta-miR-196a	0.417513	up	novel_circ_003929	-19.1506	down
bta-miR-196a	0.417513	up	novel_circ_004280	-18.7533	down
bta-miR-2285k	0.113559	up	novel_circ_000224	-3.1526	down
bta-miR-2285k	0.113559	up	novel_circ_000227	-2.18925	down
bta-miR-2285k	0.113559	up	novel_circ_000237	-2.57564	down
bta-miR-2285k	0.113559	up	novel_circ_000246	-2.02038	down
bta-miR-10162-5p	0.407572	up	novel_circ_000720	-3.51288	down
bta-miR-2285k	0.113559	up	novel_circ_000696	-2.36984	down
bta-miR-2285k	0.113559	up	novel_circ_000704	-19.091	down
bta-miR-10a	0.43081	up	novel_circ_000720	-3.51288	down
bta-miR-2285k	0.113559	up	novel_circ_000844	-19.0959	down
bta-miR-2285k	0.113559	up	novel_circ_000847	-3.28825	down
bta-miR-2285k	0.113559	up	novel_circ_000848	-2.75279	down
bta-miR-2285k	0.113559	up	novel_circ_000876	-1.97713	down
bta-miR-2285k	0.113559	up	novel_circ_001043	-1.08228	down
bta-miR-2285k	0.113559	up	novel_circ_001209	-18.7773	down
bta-miR-2285k	0.113559	up	novel_circ_001300	-18.6765	down
bta-miR-2285k	0.113559	up	novel_circ_001344	-3.07672	down
bta-miR-2285k	0.113559	up	novel_circ_001457	-18.7289	down
bta-miR-2285k	0.113559	up	novel_circ_001459	-2.59308	down
bta-miR-2285k	0.113559	up	novel_circ_001533	-2.0915	down
bta-miR-2285k	0.113559	up	novel_circ_001549	-18.7522	down
bta-miR-2285k	0.113559	up	novel_circ_001669	-1.33689	down
bta-miR-2285k	0.113559	up	novel_circ_001681	-1.40692	down
bta-miR-2285k	0.113559	up	novel_circ_002262	-18.7278	down
bta-miR-2285k	0.113559	up	novel_circ_002379	-19.0959	down
bta-miR-2285k	0.113559	up	novel_circ_002424	-18.6743	down
bta-miR-2285k	0.113559	up	novel_circ_002475	-18.6743	down
bta-miR-2285k	0.113559	up	novel_circ_002477	-19.1506	down
bta-miR-2285k	0.113559	up	novel_circ_002480	-18.7522	down
bta-miR-2285k	0.113559	up	novel_circ_002764	-18.7299	down
bta-miR-2285k	0.113559	up	novel_circ_002790	-18.6743	down
bta-miR-2285k	0.113559	up	novel_circ_002834	-18.8262	down
bta-miR-2285k	0.113559	up	novel_circ_002958	-1.66316	down
bta-miR-2285k	0.113559	up	novel_circ_003014	-1.53114	down
bta-miR-2285k	0.113559	up	novel_circ_003024	-18.7299	down
bta-miR-2285k	0.113559	up	novel_circ_003156	-18.8986	down
bta-miR-2285k	0.113559	up	novel_circ_003262	-3.45725	down
bta-miR-2285k	0.113559	up	novel_circ_003608	-3.35138	down
bta-miR-2285k	0.113559	up	novel_circ_003635	-2.02298	down
bta-miR-2285k	0.113559	up	novel_circ_003929	-19.1506	down
bta-miR-2285k	0.113559	up	novel_circ_004280	-18.7533	down
bta-miR-2332	1.5877	up	novel_circ_000224	-3.1526	down
bta-miR-2332	1.5877	up	novel_circ_000227	-2.18925	down
bta-miR-2332	1.5877	up	novel_circ_000237	-2.57564	down
bta-miR-2332	1.5877	up	novel_circ_000246	-2.02038	down
bta-miR-10b	0.220867	up	novel_circ_000720	-3.51288	down
bta-miR-2332	1.5877	up	novel_circ_000696	-2.36984	down
bta-miR-2332	1.5877	up	novel_circ_000704	-19.091	down
bta-miR-11991	1.31715	up	novel_circ_000720	-3.51288	down
bta-miR-2332	1.5877	up	novel_circ_000844	-19.0959	down
bta-miR-2332	1.5877	up	novel_circ_000847	-3.28825	down
bta-miR-2332	1.5877	up	novel_circ_000848	-2.75279	down
bta-miR-2332	1.5877	up	novel_circ_000876	-1.97713	down
bta-miR-2332	1.5877	up	novel_circ_001043	-1.08228	down
bta-miR-2332	1.5877	up	novel_circ_001209	-18.7773	down
bta-miR-2332	1.5877	up	novel_circ_001267	-19.6809	down
bta-miR-2332	1.5877	up	novel_circ_001300	-18.6765	down
bta-miR-2332	1.5877	up	novel_circ_001344	-3.07672	down
bta-miR-2332	1.5877	up	novel_circ_001457	-18.7289	down
bta-miR-2332	1.5877	up	novel_circ_001459	-2.59308	down
bta-miR-2332	1.5877	up	novel_circ_001533	-2.0915	down
bta-miR-2332	1.5877	up	novel_circ_001549	-18.7522	down
bta-miR-2332	1.5877	up	novel_circ_001669	-1.33689	down
bta-miR-2332	1.5877	up	novel_circ_001681	-1.40692	down
bta-miR-2332	1.5877	up	novel_circ_002262	-18.7278	down
bta-miR-2332	1.5877	up	novel_circ_002379	-19.0959	down
bta-miR-2332	1.5877	up	novel_circ_002424	-18.6743	down
bta-miR-2332	1.5877	up	novel_circ_002477	-19.1506	down
bta-miR-2332	1.5877	up	novel_circ_002480	-18.7522	down
bta-miR-2332	1.5877	up	novel_circ_002745	-18.6809	down
bta-miR-2332	1.5877	up	novel_circ_002764	-18.7299	down
bta-miR-2332	1.5877	up	novel_circ_002834	-18.8262	down
bta-miR-2332	1.5877	up	novel_circ_002958	-1.66316	down
bta-miR-2332	1.5877	up	novel_circ_003014	-1.53114	down
bta-miR-2332	1.5877	up	novel_circ_003024	-18.7299	down
bta-miR-2332	1.5877	up	novel_circ_003156	-18.8986	down
bta-miR-2332	1.5877	up	novel_circ_003262	-3.45725	down
bta-miR-2332	1.5877	up	novel_circ_003305	-1.5998	down
bta-miR-2332	1.5877	up	novel_circ_003608	-3.35138	down
bta-miR-2332	1.5877	up	novel_circ_003627	-2.4812	down
bta-miR-2332	1.5877	up	novel_circ_003635	-2.02298	down
bta-miR-2332	1.5877	up	novel_circ_003863	-2.96941	down
bta-miR-2332	1.5877	up	novel_circ_003929	-19.1506	down
bta-miR-2332	1.5877	up	novel_circ_004280	-18.7533	down
bta-miR-2335	0.408098	up	novel_circ_000224	-3.1526	down
bta-miR-2335	0.408098	up	novel_circ_000237	-2.57564	down
bta-miR-2335	0.408098	up	novel_circ_000246	-2.02038	down
bta-miR-1291	2.37518	up	novel_circ_000720	-3.51288	down
bta-miR-2335	0.408098	up	novel_circ_000696	-2.36984	down
bta-miR-2335	0.408098	up	novel_circ_000704	-19.091	down
bta-miR-1468	0.352992	up	novel_circ_000720	-3.51288	down
bta-miR-2335	0.408098	up	novel_circ_000844	-19.0959	down
bta-miR-2335	0.408098	up	novel_circ_000847	-3.28825	down
bta-miR-2335	0.408098	up	novel_circ_000848	-2.75279	down
bta-miR-2335	0.408098	up	novel_circ_000876	-1.97713	down
bta-miR-2335	0.408098	up	novel_circ_001043	-1.08228	down
bta-miR-2335	0.408098	up	novel_circ_001209	-18.7773	down
bta-miR-2335	0.408098	up	novel_circ_001267	-19.6809	down
bta-miR-2335	0.408098	up	novel_circ_001300	-18.6765	down
bta-miR-2335	0.408098	up	novel_circ_001344	-3.07672	down
bta-miR-2335	0.408098	up	novel_circ_001457	-18.7289	down
bta-miR-2335	0.408098	up	novel_circ_001459	-2.59308	down
bta-miR-2335	0.408098	up	novel_circ_001533	-2.0915	down
bta-miR-2335	0.408098	up	novel_circ_001549	-18.7522	down
bta-miR-2335	0.408098	up	novel_circ_001681	-1.40692	down
bta-miR-2335	0.408098	up	novel_circ_002262	-18.7278	down
bta-miR-2335	0.408098	up	novel_circ_002379	-19.0959	down
bta-miR-2335	0.408098	up	novel_circ_002477	-19.1506	down
bta-miR-2335	0.408098	up	novel_circ_002480	-18.7522	down
bta-miR-2335	0.408098	up	novel_circ_002745	-18.6809	down
bta-miR-2335	0.408098	up	novel_circ_002764	-18.7299	down
bta-miR-2335	0.408098	up	novel_circ_002834	-18.8262	down
bta-miR-2335	0.408098	up	novel_circ_002958	-1.66316	down
bta-miR-2335	0.408098	up	novel_circ_003014	-1.53114	down
bta-miR-2335	0.408098	up	novel_circ_003024	-18.7299	down
bta-miR-2335	0.408098	up	novel_circ_003156	-18.8986	down
bta-miR-2335	0.408098	up	novel_circ_003262	-3.45725	down
bta-miR-2335	0.408098	up	novel_circ_003305	-1.5998	down
bta-miR-2335	0.408098	up	novel_circ_003635	-2.02298	down
bta-miR-2335	0.408098	up	novel_circ_003867	-0.69489	down
bta-miR-2335	0.408098	up	novel_circ_003929	-19.1506	down
bta-miR-2335	0.408098	up	novel_circ_004280	-18.7533	down
bta-miR-2370-5p	5.71608	up	novel_circ_000224	-3.1526	down
bta-miR-2370-5p	5.71608	up	novel_circ_000227	-2.18925	down
bta-miR-2370-5p	5.71608	up	novel_circ_000237	-2.57564	down
bta-miR-2370-5p	5.71608	up	novel_circ_000246	-2.02038	down
bta-miR-146b	0.432793	up	novel_circ_000720	-3.51288	down
bta-miR-2370-5p	5.71608	up	novel_circ_000696	-2.36984	down
bta-miR-2370-5p	5.71608	up	novel_circ_000704	-19.091	down
bta-miR-148a	0.104476	up	novel_circ_000720	-3.51288	down
bta-miR-2370-5p	5.71608	up	novel_circ_000844	-19.0959	down
bta-miR-2370-5p	5.71608	up	novel_circ_000847	-3.28825	down
bta-miR-2370-5p	5.71608	up	novel_circ_000848	-2.75279	down
bta-miR-2370-5p	5.71608	up	novel_circ_000876	-1.97713	down
bta-miR-2370-5p	5.71608	up	novel_circ_001043	-1.08228	down
bta-miR-2370-5p	5.71608	up	novel_circ_001209	-18.7773	down
bta-miR-2370-5p	5.71608	up	novel_circ_001267	-19.6809	down
bta-miR-2370-5p	5.71608	up	novel_circ_001300	-18.6765	down
bta-miR-2370-5p	5.71608	up	novel_circ_001344	-3.07672	down
bta-miR-2370-5p	5.71608	up	novel_circ_001457	-18.7289	down
bta-miR-2370-5p	5.71608	up	novel_circ_001459	-2.59308	down
bta-miR-2370-5p	5.71608	up	novel_circ_001533	-2.0915	down
bta-miR-2370-5p	5.71608	up	novel_circ_001549	-18.7522	down
bta-miR-2370-5p	5.71608	up	novel_circ_001669	-1.33689	down
bta-miR-2370-5p	5.71608	up	novel_circ_001681	-1.40692	down
bta-miR-2370-5p	5.71608	up	novel_circ_002262	-18.7278	down
bta-miR-2370-5p	5.71608	up	novel_circ_002379	-19.0959	down
bta-miR-2370-5p	5.71608	up	novel_circ_002475	-18.6743	down
bta-miR-2370-5p	5.71608	up	novel_circ_002477	-19.1506	down
bta-miR-2370-5p	5.71608	up	novel_circ_002480	-18.7522	down
bta-miR-2370-5p	5.71608	up	novel_circ_002745	-18.6809	down
bta-miR-2370-5p	5.71608	up	novel_circ_002764	-18.7299	down
bta-miR-2370-5p	5.71608	up	novel_circ_002790	-18.6743	down
bta-miR-2370-5p	5.71608	up	novel_circ_002834	-18.8262	down
bta-miR-2370-5p	5.71608	up	novel_circ_002958	-1.66316	down
bta-miR-2370-5p	5.71608	up	novel_circ_003014	-1.53114	down
bta-miR-2370-5p	5.71608	up	novel_circ_003024	-18.7299	down
bta-miR-2370-5p	5.71608	up	novel_circ_003156	-18.8986	down
bta-miR-2370-5p	5.71608	up	novel_circ_003262	-3.45725	down
bta-miR-2370-5p	5.71608	up	novel_circ_003305	-1.5998	down
bta-miR-2370-5p	5.71608	up	novel_circ_003608	-3.35138	down
bta-miR-2370-5p	5.71608	up	novel_circ_003627	-2.4812	down
bta-miR-2370-5p	5.71608	up	novel_circ_003635	-2.02298	down
bta-miR-2370-5p	5.71608	up	novel_circ_003863	-2.96941	down
bta-miR-2370-5p	5.71608	up	novel_circ_003867	-0.69489	down
bta-miR-2370-5p	5.71608	up	novel_circ_003929	-19.1506	down
bta-miR-2370-5p	5.71608	up	novel_circ_004280	-18.7533	down
bta-miR-2431-3p	0.326879	up	novel_circ_000224	-3.1526	down
bta-miR-2431-3p	0.326879	up	novel_circ_000227	-2.18925	down
bta-miR-2431-3p	0.326879	up	novel_circ_000237	-2.57564	down
bta-miR-2431-3p	0.326879	up	novel_circ_000246	-2.02038	down
bta-miR-181b	0.306306	up	novel_circ_000720	-3.51288	down
bta-miR-2431-3p	0.326879	up	novel_circ_000696	-2.36984	down
bta-miR-2431-3p	0.326879	up	novel_circ_000704	-19.091	down
bta-miR-181c	1.31277	up	novel_circ_000720	-3.51288	down
bta-miR-2431-3p	0.326879	up	novel_circ_000844	-19.0959	down
bta-miR-2431-3p	0.326879	up	novel_circ_000847	-3.28825	down
bta-miR-2431-3p	0.326879	up	novel_circ_000848	-2.75279	down
bta-miR-2431-3p	0.326879	up	novel_circ_000876	-1.97713	down
bta-miR-2431-3p	0.326879	up	novel_circ_001043	-1.08228	down
bta-miR-2431-3p	0.326879	up	novel_circ_001209	-18.7773	down
bta-miR-2431-3p	0.326879	up	novel_circ_001267	-19.6809	down
bta-miR-2431-3p	0.326879	up	novel_circ_001300	-18.6765	down
bta-miR-2431-3p	0.326879	up	novel_circ_001344	-3.07672	down
bta-miR-2431-3p	0.326879	up	novel_circ_001457	-18.7289	down
bta-miR-2431-3p	0.326879	up	novel_circ_001459	-2.59308	down
bta-miR-2431-3p	0.326879	up	novel_circ_001533	-2.0915	down
bta-miR-2431-3p	0.326879	up	novel_circ_001549	-18.7522	down
bta-miR-2431-3p	0.326879	up	novel_circ_001669	-1.33689	down
bta-miR-2431-3p	0.326879	up	novel_circ_001681	-1.40692	down
bta-miR-2431-3p	0.326879	up	novel_circ_002262	-18.7278	down
bta-miR-2431-3p	0.326879	up	novel_circ_002379	-19.0959	down
bta-miR-2431-3p	0.326879	up	novel_circ_002424	-18.6743	down
bta-miR-2431-3p	0.326879	up	novel_circ_002475	-18.6743	down
bta-miR-2431-3p	0.326879	up	novel_circ_002477	-19.1506	down
bta-miR-2431-3p	0.326879	up	novel_circ_002480	-18.7522	down
bta-miR-2431-3p	0.326879	up	novel_circ_002745	-18.6809	down
bta-miR-2431-3p	0.326879	up	novel_circ_002764	-18.7299	down
bta-miR-2431-3p	0.326879	up	novel_circ_002790	-18.6743	down
bta-miR-2431-3p	0.326879	up	novel_circ_002834	-18.8262	down
bta-miR-2431-3p	0.326879	up	novel_circ_002958	-1.66316	down
bta-miR-2431-3p	0.326879	up	novel_circ_003014	-1.53114	down
bta-miR-2431-3p	0.326879	up	novel_circ_003024	-18.7299	down
bta-miR-2431-3p	0.326879	up	novel_circ_003156	-18.8986	down
bta-miR-2431-3p	0.326879	up	novel_circ_003262	-3.45725	down
bta-miR-2431-3p	0.326879	up	novel_circ_003305	-1.5998	down
bta-miR-2431-3p	0.326879	up	novel_circ_003608	-3.35138	down
bta-miR-2431-3p	0.326879	up	novel_circ_003635	-2.02298	down
bta-miR-2431-3p	0.326879	up	novel_circ_003863	-2.96941	down
bta-miR-2431-3p	0.326879	up	novel_circ_003929	-19.1506	down
bta-miR-2431-3p	0.326879	up	novel_circ_004280	-18.7533	down
bta-miR-30a-5p	0.333408	up	novel_circ_000224	-3.1526	down
bta-miR-30a-5p	0.333408	up	novel_circ_000227	-2.18925	down
bta-miR-30a-5p	0.333408	up	novel_circ_000237	-2.57564	down
bta-miR-30a-5p	0.333408	up	novel_circ_000246	-2.02038	down
bta-miR-182	0.377445	up	novel_circ_000720	-3.51288	down
bta-miR-30a-5p	0.333408	up	novel_circ_000696	-2.36984	down
bta-miR-30a-5p	0.333408	up	novel_circ_000704	-19.091	down
bta-miR-183	0.572909	up	novel_circ_000720	-3.51288	down
bta-miR-30a-5p	0.333408	up	novel_circ_000844	-19.0959	down
bta-miR-30a-5p	0.333408	up	novel_circ_000847	-3.28825	down
bta-miR-30a-5p	0.333408	up	novel_circ_000848	-2.75279	down
bta-miR-30a-5p	0.333408	up	novel_circ_000876	-1.97713	down
bta-miR-30a-5p	0.333408	up	novel_circ_001043	-1.08228	down
bta-miR-30a-5p	0.333408	up	novel_circ_001209	-18.7773	down
bta-miR-30a-5p	0.333408	up	novel_circ_001267	-19.6809	down
bta-miR-30a-5p	0.333408	up	novel_circ_001300	-18.6765	down
bta-miR-30a-5p	0.333408	up	novel_circ_001344	-3.07672	down
bta-miR-30a-5p	0.333408	up	novel_circ_001457	-18.7289	down
bta-miR-30a-5p	0.333408	up	novel_circ_001459	-2.59308	down
bta-miR-30a-5p	0.333408	up	novel_circ_001533	-2.0915	down
bta-miR-30a-5p	0.333408	up	novel_circ_001549	-18.7522	down
bta-miR-30a-5p	0.333408	up	novel_circ_001669	-1.33689	down
bta-miR-30a-5p	0.333408	up	novel_circ_001681	-1.40692	down
bta-miR-30a-5p	0.333408	up	novel_circ_002262	-18.7278	down
bta-miR-30a-5p	0.333408	up	novel_circ_002379	-19.0959	down
bta-miR-30a-5p	0.333408	up	novel_circ_002424	-18.6743	down
bta-miR-30a-5p	0.333408	up	novel_circ_002475	-18.6743	down
bta-miR-30a-5p	0.333408	up	novel_circ_002477	-19.1506	down
bta-miR-30a-5p	0.333408	up	novel_circ_002480	-18.7522	down
bta-miR-30a-5p	0.333408	up	novel_circ_002745	-18.6809	down
bta-miR-30a-5p	0.333408	up	novel_circ_002764	-18.7299	down
bta-miR-30a-5p	0.333408	up	novel_circ_002790	-18.6743	down
bta-miR-30a-5p	0.333408	up	novel_circ_002834	-18.8262	down
bta-miR-30a-5p	0.333408	up	novel_circ_002958	-1.66316	down
bta-miR-30a-5p	0.333408	up	novel_circ_003014	-1.53114	down
bta-miR-30a-5p	0.333408	up	novel_circ_003024	-18.7299	down
bta-miR-30a-5p	0.333408	up	novel_circ_003156	-18.8986	down
bta-miR-30a-5p	0.333408	up	novel_circ_003262	-3.45725	down
bta-miR-30a-5p	0.333408	up	novel_circ_003305	-1.5998	down
bta-miR-30a-5p	0.333408	up	novel_circ_003608	-3.35138	down
bta-miR-30a-5p	0.333408	up	novel_circ_003627	-2.4812	down
bta-miR-30a-5p	0.333408	up	novel_circ_003635	-2.02298	down
bta-miR-30a-5p	0.333408	up	novel_circ_003863	-2.96941	down
bta-miR-30a-5p	0.333408	up	novel_circ_003867	-0.69489	down
bta-miR-30a-5p	0.333408	up	novel_circ_003929	-19.1506	down
bta-miR-30a-5p	0.333408	up	novel_circ_004280	-18.7533	down
bta-miR-30e-5p	0.19606	up	novel_circ_000224	-3.1526	down
bta-miR-30e-5p	0.19606	up	novel_circ_000227	-2.18925	down
bta-miR-30e-5p	0.19606	up	novel_circ_000237	-2.57564	down
bta-miR-30e-5p	0.19606	up	novel_circ_000246	-2.02038	down
bta-miR-191	0.393459	up	novel_circ_000720	-3.51288	down
bta-miR-30e-5p	0.19606	up	novel_circ_000696	-2.36984	down
bta-miR-30e-5p	0.19606	up	novel_circ_000704	-19.091	down
bta-miR-192	0.22331	up	novel_circ_000720	-3.51288	down
bta-miR-30e-5p	0.19606	up	novel_circ_000844	-19.0959	down
bta-miR-30e-5p	0.19606	up	novel_circ_000847	-3.28825	down
bta-miR-30e-5p	0.19606	up	novel_circ_000848	-2.75279	down
bta-miR-30e-5p	0.19606	up	novel_circ_000876	-1.97713	down
bta-miR-30e-5p	0.19606	up	novel_circ_001043	-1.08228	down
bta-miR-30e-5p	0.19606	up	novel_circ_001209	-18.7773	down
bta-miR-30e-5p	0.19606	up	novel_circ_001267	-19.6809	down
bta-miR-30e-5p	0.19606	up	novel_circ_001300	-18.6765	down
bta-miR-30e-5p	0.19606	up	novel_circ_001344	-3.07672	down
bta-miR-30e-5p	0.19606	up	novel_circ_001457	-18.7289	down
bta-miR-30e-5p	0.19606	up	novel_circ_001459	-2.59308	down
bta-miR-30e-5p	0.19606	up	novel_circ_001533	-2.0915	down
bta-miR-30e-5p	0.19606	up	novel_circ_001549	-18.7522	down
bta-miR-30e-5p	0.19606	up	novel_circ_001669	-1.33689	down
bta-miR-30e-5p	0.19606	up	novel_circ_001681	-1.40692	down
bta-miR-30e-5p	0.19606	up	novel_circ_002262	-18.7278	down
bta-miR-30e-5p	0.19606	up	novel_circ_002379	-19.0959	down
bta-miR-30e-5p	0.19606	up	novel_circ_002424	-18.6743	down
bta-miR-30e-5p	0.19606	up	novel_circ_002475	-18.6743	down
bta-miR-30e-5p	0.19606	up	novel_circ_002477	-19.1506	down
bta-miR-30e-5p	0.19606	up	novel_circ_002480	-18.7522	down
bta-miR-30e-5p	0.19606	up	novel_circ_002745	-18.6809	down
bta-miR-30e-5p	0.19606	up	novel_circ_002764	-18.7299	down
bta-miR-30e-5p	0.19606	up	novel_circ_002790	-18.6743	down
bta-miR-30e-5p	0.19606	up	novel_circ_002834	-18.8262	down
bta-miR-30e-5p	0.19606	up	novel_circ_002958	-1.66316	down
bta-miR-30e-5p	0.19606	up	novel_circ_003014	-1.53114	down
bta-miR-30e-5p	0.19606	up	novel_circ_003024	-18.7299	down
bta-miR-30e-5p	0.19606	up	novel_circ_003156	-18.8986	down
bta-miR-30e-5p	0.19606	up	novel_circ_003262	-3.45725	down
bta-miR-30e-5p	0.19606	up	novel_circ_003305	-1.5998	down
bta-miR-30e-5p	0.19606	up	novel_circ_003608	-3.35138	down
bta-miR-30e-5p	0.19606	up	novel_circ_003627	-2.4812	down
bta-miR-30e-5p	0.19606	up	novel_circ_003635	-2.02298	down
bta-miR-30e-5p	0.19606	up	novel_circ_003863	-2.96941	down
bta-miR-30e-5p	0.19606	up	novel_circ_003867	-0.69489	down
bta-miR-30e-5p	0.19606	up	novel_circ_003929	-19.1506	down
bta-miR-30e-5p	0.19606	up	novel_circ_004280	-18.7533	down
bta-miR-30f	0.113617	up	novel_circ_000224	-3.1526	down
bta-miR-30f	0.113617	up	novel_circ_000227	-2.18925	down
bta-miR-30f	0.113617	up	novel_circ_000237	-2.57564	down
bta-miR-30f	0.113617	up	novel_circ_000246	-2.02038	down
bta-miR-193a-5p	0.354289	up	novel_circ_000720	-3.51288	down
bta-miR-30f	0.113617	up	novel_circ_000696	-2.36984	down
bta-miR-30f	0.113617	up	novel_circ_000704	-19.091	down
bta-miR-1949	0.73694	up	novel_circ_000720	-3.51288	down
bta-miR-30f	0.113617	up	novel_circ_000847	-3.28825	down
bta-miR-30f	0.113617	up	novel_circ_000848	-2.75279	down
bta-miR-30f	0.113617	up	novel_circ_001043	-1.08228	down
bta-miR-30f	0.113617	up	novel_circ_001209	-18.7773	down
bta-miR-30f	0.113617	up	novel_circ_001267	-19.6809	down
bta-miR-30f	0.113617	up	novel_circ_001300	-18.6765	down
bta-miR-30f	0.113617	up	novel_circ_001344	-3.07672	down
bta-miR-30f	0.113617	up	novel_circ_001457	-18.7289	down
bta-miR-30f	0.113617	up	novel_circ_001459	-2.59308	down
bta-miR-30f	0.113617	up	novel_circ_001549	-18.7522	down
bta-miR-30f	0.113617	up	novel_circ_001669	-1.33689	down
bta-miR-30f	0.113617	up	novel_circ_001681	-1.40692	down
bta-miR-30f	0.113617	up	novel_circ_002262	-18.7278	down
bta-miR-30f	0.113617	up	novel_circ_002475	-18.6743	down
bta-miR-30f	0.113617	up	novel_circ_002477	-19.1506	down
bta-miR-30f	0.113617	up	novel_circ_002480	-18.7522	down
bta-miR-30f	0.113617	up	novel_circ_002745	-18.6809	down
bta-miR-30f	0.113617	up	novel_circ_002764	-18.7299	down
bta-miR-30f	0.113617	up	novel_circ_002790	-18.6743	down
bta-miR-30f	0.113617	up	novel_circ_002834	-18.8262	down
bta-miR-30f	0.113617	up	novel_circ_002958	-1.66316	down
bta-miR-30f	0.113617	up	novel_circ_003014	-1.53114	down
bta-miR-30f	0.113617	up	novel_circ_003024	-18.7299	down
bta-miR-30f	0.113617	up	novel_circ_003156	-18.8986	down
bta-miR-30f	0.113617	up	novel_circ_003305	-1.5998	down
bta-miR-30f	0.113617	up	novel_circ_003627	-2.4812	down
bta-miR-30f	0.113617	up	novel_circ_003635	-2.02298	down
bta-miR-30f	0.113617	up	novel_circ_003863	-2.96941	down
bta-miR-30f	0.113617	up	novel_circ_003867	-0.69489	down
bta-miR-30f	0.113617	up	novel_circ_003929	-19.1506	down
bta-miR-30f	0.113617	up	novel_circ_004280	-18.7533	down
bta-miR-320a	0.62714	up	novel_circ_000224	-3.1526	down
bta-miR-320a	0.62714	up	novel_circ_000227	-2.18925	down
bta-miR-320a	0.62714	up	novel_circ_000237	-2.57564	down
bta-miR-320a	0.62714	up	novel_circ_000246	-2.02038	down
bta-miR-196a	0.417513	up	novel_circ_000720	-3.51288	down
bta-miR-320a	0.62714	up	novel_circ_000696	-2.36984	down
bta-miR-2285k	0.113559	up	novel_circ_000720	-3.51288	down
bta-miR-320a	0.62714	up	novel_circ_000847	-3.28825	down
bta-miR-320a	0.62714	up	novel_circ_000848	-2.75279	down
bta-miR-320a	0.62714	up	novel_circ_000876	-1.97713	down
bta-miR-320a	0.62714	up	novel_circ_001043	-1.08228	down
bta-miR-320a	0.62714	up	novel_circ_001209	-18.7773	down
bta-miR-320a	0.62714	up	novel_circ_001267	-19.6809	down
bta-miR-320a	0.62714	up	novel_circ_001344	-3.07672	down
bta-miR-320a	0.62714	up	novel_circ_001457	-18.7289	down
bta-miR-320a	0.62714	up	novel_circ_001459	-2.59308	down
bta-miR-320a	0.62714	up	novel_circ_001549	-18.7522	down
bta-miR-320a	0.62714	up	novel_circ_001669	-1.33689	down
bta-miR-320a	0.62714	up	novel_circ_001681	-1.40692	down
bta-miR-320a	0.62714	up	novel_circ_002262	-18.7278	down
bta-miR-320a	0.62714	up	novel_circ_002424	-18.6743	down
bta-miR-320a	0.62714	up	novel_circ_002477	-19.1506	down
bta-miR-320a	0.62714	up	novel_circ_002480	-18.7522	down
bta-miR-320a	0.62714	up	novel_circ_002745	-18.6809	down
bta-miR-320a	0.62714	up	novel_circ_002764	-18.7299	down
bta-miR-320a	0.62714	up	novel_circ_002834	-18.8262	down
bta-miR-320a	0.62714	up	novel_circ_002958	-1.66316	down
bta-miR-320a	0.62714	up	novel_circ_003014	-1.53114	down
bta-miR-320a	0.62714	up	novel_circ_003024	-18.7299	down
bta-miR-320a	0.62714	up	novel_circ_003305	-1.5998	down
bta-miR-320a	0.62714	up	novel_circ_003608	-3.35138	down
bta-miR-320a	0.62714	up	novel_circ_003627	-2.4812	down
bta-miR-320a	0.62714	up	novel_circ_003635	-2.02298	down
bta-miR-320a	0.62714	up	novel_circ_003863	-2.96941	down
bta-miR-320a	0.62714	up	novel_circ_003929	-19.1506	down
bta-miR-320a	0.62714	up	novel_circ_004280	-18.7533	down
bta-miR-342	0.282089	up	novel_circ_000224	-3.1526	down
bta-miR-342	0.282089	up	novel_circ_000227	-2.18925	down
bta-miR-342	0.282089	up	novel_circ_000237	-2.57564	down
bta-miR-2332	1.5877	up	novel_circ_000720	-3.51288	down
bta-miR-342	0.282089	up	novel_circ_000696	-2.36984	down
bta-miR-342	0.282089	up	novel_circ_000704	-19.091	down
bta-miR-2335	0.408098	up	novel_circ_000720	-3.51288	down
bta-miR-342	0.282089	up	novel_circ_000844	-19.0959	down
bta-miR-342	0.282089	up	novel_circ_000847	-3.28825	down
bta-miR-342	0.282089	up	novel_circ_000848	-2.75279	down
bta-miR-342	0.282089	up	novel_circ_000876	-1.97713	down
bta-miR-342	0.282089	up	novel_circ_001043	-1.08228	down
bta-miR-342	0.282089	up	novel_circ_001209	-18.7773	down
bta-miR-342	0.282089	up	novel_circ_001300	-18.6765	down
bta-miR-342	0.282089	up	novel_circ_001344	-3.07672	down
bta-miR-342	0.282089	up	novel_circ_001457	-18.7289	down
bta-miR-342	0.282089	up	novel_circ_001459	-2.59308	down
bta-miR-342	0.282089	up	novel_circ_001533	-2.0915	down
bta-miR-342	0.282089	up	novel_circ_001549	-18.7522	down
bta-miR-342	0.282089	up	novel_circ_001669	-1.33689	down
bta-miR-342	0.282089	up	novel_circ_001681	-1.40692	down
bta-miR-342	0.282089	up	novel_circ_002262	-18.7278	down
bta-miR-342	0.282089	up	novel_circ_002379	-19.0959	down
bta-miR-342	0.282089	up	novel_circ_002424	-18.6743	down
bta-miR-342	0.282089	up	novel_circ_002475	-18.6743	down
bta-miR-342	0.282089	up	novel_circ_002477	-19.1506	down
bta-miR-342	0.282089	up	novel_circ_002480	-18.7522	down
bta-miR-342	0.282089	up	novel_circ_002764	-18.7299	down
bta-miR-342	0.282089	up	novel_circ_002790	-18.6743	down
bta-miR-342	0.282089	up	novel_circ_002834	-18.8262	down
bta-miR-342	0.282089	up	novel_circ_002958	-1.66316	down
bta-miR-342	0.282089	up	novel_circ_003014	-1.53114	down
bta-miR-342	0.282089	up	novel_circ_003024	-18.7299	down
bta-miR-342	0.282089	up	novel_circ_003156	-18.8986	down
bta-miR-342	0.282089	up	novel_circ_003262	-3.45725	down
bta-miR-342	0.282089	up	novel_circ_003305	-1.5998	down
bta-miR-342	0.282089	up	novel_circ_003608	-3.35138	down
bta-miR-342	0.282089	up	novel_circ_003627	-2.4812	down
bta-miR-342	0.282089	up	novel_circ_003635	-2.02298	down
bta-miR-342	0.282089	up	novel_circ_003863	-2.96941	down
bta-miR-342	0.282089	up	novel_circ_003929	-19.1506	down
bta-miR-342	0.282089	up	novel_circ_004280	-18.7533	down
bta-miR-3432a	0.496315	up	novel_circ_000224	-3.1526	down
bta-miR-3432a	0.496315	up	novel_circ_000227	-2.18925	down
bta-miR-3432a	0.496315	up	novel_circ_000237	-2.57564	down
bta-miR-3432a	0.496315	up	novel_circ_000246	-2.02038	down
bta-miR-2370-5p	5.71608	up	novel_circ_000720	-3.51288	down
bta-miR-3432a	0.496315	up	novel_circ_000696	-2.36984	down
bta-miR-3432a	0.496315	up	novel_circ_000704	-19.091	down
bta-miR-2431-3p	0.326879	up	novel_circ_000720	-3.51288	down
bta-miR-3432a	0.496315	up	novel_circ_000844	-19.0959	down
bta-miR-3432a	0.496315	up	novel_circ_000847	-3.28825	down
bta-miR-3432a	0.496315	up	novel_circ_000848	-2.75279	down
bta-miR-3432a	0.496315	up	novel_circ_000876	-1.97713	down
bta-miR-3432a	0.496315	up	novel_circ_001043	-1.08228	down
bta-miR-3432a	0.496315	up	novel_circ_001209	-18.7773	down
bta-miR-3432a	0.496315	up	novel_circ_001267	-19.6809	down
bta-miR-3432a	0.496315	up	novel_circ_001300	-18.6765	down
bta-miR-3432a	0.496315	up	novel_circ_001344	-3.07672	down
bta-miR-3432a	0.496315	up	novel_circ_001457	-18.7289	down
bta-miR-3432a	0.496315	up	novel_circ_001459	-2.59308	down
bta-miR-3432a	0.496315	up	novel_circ_001533	-2.0915	down
bta-miR-3432a	0.496315	up	novel_circ_001549	-18.7522	down
bta-miR-3432a	0.496315	up	novel_circ_001669	-1.33689	down
bta-miR-3432a	0.496315	up	novel_circ_001681	-1.40692	down
bta-miR-3432a	0.496315	up	novel_circ_002262	-18.7278	down
bta-miR-3432a	0.496315	up	novel_circ_002379	-19.0959	down
bta-miR-3432a	0.496315	up	novel_circ_002424	-18.6743	down
bta-miR-3432a	0.496315	up	novel_circ_002477	-19.1506	down
bta-miR-3432a	0.496315	up	novel_circ_002480	-18.7522	down
bta-miR-3432a	0.496315	up	novel_circ_002745	-18.6809	down
bta-miR-3432a	0.496315	up	novel_circ_002764	-18.7299	down
bta-miR-3432a	0.496315	up	novel_circ_002834	-18.8262	down
bta-miR-3432a	0.496315	up	novel_circ_002958	-1.66316	down
bta-miR-3432a	0.496315	up	novel_circ_003014	-1.53114	down
bta-miR-3432a	0.496315	up	novel_circ_003024	-18.7299	down
bta-miR-3432a	0.496315	up	novel_circ_003156	-18.8986	down
bta-miR-3432a	0.496315	up	novel_circ_003262	-3.45725	down
bta-miR-3432a	0.496315	up	novel_circ_003305	-1.5998	down
bta-miR-3432a	0.496315	up	novel_circ_003608	-3.35138	down
bta-miR-3432a	0.496315	up	novel_circ_003635	-2.02298	down
bta-miR-3432a	0.496315	up	novel_circ_003863	-2.96941	down
bta-miR-3432a	0.496315	up	novel_circ_003929	-19.1506	down
bta-miR-3432a	0.496315	up	novel_circ_004280	-18.7533	down
bta-miR-425-5p	0.13152	up	novel_circ_000224	-3.1526	down
bta-miR-425-5p	0.13152	up	novel_circ_000227	-2.18925	down
bta-miR-425-5p	0.13152	up	novel_circ_000237	-2.57564	down
bta-miR-425-5p	0.13152	up	novel_circ_000246	-2.02038	down
bta-miR-30a-5p	0.333408	up	novel_circ_000720	-3.51288	down
bta-miR-425-5p	0.13152	up	novel_circ_000696	-2.36984	down
bta-miR-425-5p	0.13152	up	novel_circ_000704	-19.091	down
bta-miR-30e-5p	0.19606	up	novel_circ_000720	-3.51288	down
bta-miR-425-5p	0.13152	up	novel_circ_000847	-3.28825	down
bta-miR-425-5p	0.13152	up	novel_circ_000848	-2.75279	down
bta-miR-425-5p	0.13152	up	novel_circ_001043	-1.08228	down
bta-miR-425-5p	0.13152	up	novel_circ_001209	-18.7773	down
bta-miR-425-5p	0.13152	up	novel_circ_001267	-19.6809	down
bta-miR-425-5p	0.13152	up	novel_circ_001300	-18.6765	down
bta-miR-425-5p	0.13152	up	novel_circ_001344	-3.07672	down
bta-miR-425-5p	0.13152	up	novel_circ_001457	-18.7289	down
bta-miR-425-5p	0.13152	up	novel_circ_001459	-2.59308	down
bta-miR-425-5p	0.13152	up	novel_circ_001549	-18.7522	down
bta-miR-425-5p	0.13152	up	novel_circ_001669	-1.33689	down
bta-miR-425-5p	0.13152	up	novel_circ_002262	-18.7278	down
bta-miR-425-5p	0.13152	up	novel_circ_002424	-18.6743	down
bta-miR-425-5p	0.13152	up	novel_circ_002475	-18.6743	down
bta-miR-425-5p	0.13152	up	novel_circ_002477	-19.1506	down
bta-miR-425-5p	0.13152	up	novel_circ_002480	-18.7522	down
bta-miR-425-5p	0.13152	up	novel_circ_002745	-18.6809	down
bta-miR-425-5p	0.13152	up	novel_circ_002764	-18.7299	down
bta-miR-425-5p	0.13152	up	novel_circ_002790	-18.6743	down
bta-miR-425-5p	0.13152	up	novel_circ_002958	-1.66316	down
bta-miR-425-5p	0.13152	up	novel_circ_003014	-1.53114	down
bta-miR-425-5p	0.13152	up	novel_circ_003024	-18.7299	down
bta-miR-425-5p	0.13152	up	novel_circ_003156	-18.8986	down
bta-miR-425-5p	0.13152	up	novel_circ_003305	-1.5998	down
bta-miR-425-5p	0.13152	up	novel_circ_003627	-2.4812	down
bta-miR-425-5p	0.13152	up	novel_circ_003635	-2.02298	down
bta-miR-425-5p	0.13152	up	novel_circ_003863	-2.96941	down
bta-miR-425-5p	0.13152	up	novel_circ_003867	-0.69489	down
bta-miR-425-5p	0.13152	up	novel_circ_003929	-19.1506	down
bta-miR-425-5p	0.13152	up	novel_circ_004280	-18.7533	down
bta-miR-574	0.852636	up	novel_circ_000224	-3.1526	down
bta-miR-574	0.852636	up	novel_circ_000227	-2.18925	down
bta-miR-574	0.852636	up	novel_circ_000237	-2.57564	down
bta-miR-574	0.852636	up	novel_circ_000246	-2.02038	down
bta-miR-30f	0.113617	up	novel_circ_000720	-3.51288	down
bta-miR-574	0.852636	up	novel_circ_000696	-2.36984	down
bta-miR-574	0.852636	up	novel_circ_000704	-19.091	down
bta-miR-320a	0.62714	up	novel_circ_000720	-3.51288	down
bta-miR-574	0.852636	up	novel_circ_000844	-19.0959	down
bta-miR-574	0.852636	up	novel_circ_000847	-3.28825	down
bta-miR-574	0.852636	up	novel_circ_000848	-2.75279	down
bta-miR-574	0.852636	up	novel_circ_000876	-1.97713	down
bta-miR-574	0.852636	up	novel_circ_001043	-1.08228	down
bta-miR-574	0.852636	up	novel_circ_001209	-18.7773	down
bta-miR-574	0.852636	up	novel_circ_001267	-19.6809	down
bta-miR-574	0.852636	up	novel_circ_001300	-18.6765	down
bta-miR-574	0.852636	up	novel_circ_001344	-3.07672	down
bta-miR-574	0.852636	up	novel_circ_001457	-18.7289	down
bta-miR-574	0.852636	up	novel_circ_001459	-2.59308	down
bta-miR-574	0.852636	up	novel_circ_001533	-2.0915	down
bta-miR-574	0.852636	up	novel_circ_001549	-18.7522	down
bta-miR-574	0.852636	up	novel_circ_001669	-1.33689	down
bta-miR-574	0.852636	up	novel_circ_001681	-1.40692	down
bta-miR-574	0.852636	up	novel_circ_002262	-18.7278	down
bta-miR-574	0.852636	up	novel_circ_002379	-19.0959	down
bta-miR-574	0.852636	up	novel_circ_002424	-18.6743	down
bta-miR-574	0.852636	up	novel_circ_002477	-19.1506	down
bta-miR-574	0.852636	up	novel_circ_002480	-18.7522	down
bta-miR-574	0.852636	up	novel_circ_002745	-18.6809	down
bta-miR-574	0.852636	up	novel_circ_002764	-18.7299	down
bta-miR-574	0.852636	up	novel_circ_002834	-18.8262	down
bta-miR-574	0.852636	up	novel_circ_002958	-1.66316	down
bta-miR-574	0.852636	up	novel_circ_003014	-1.53114	down
bta-miR-574	0.852636	up	novel_circ_003024	-18.7299	down
bta-miR-574	0.852636	up	novel_circ_003156	-18.8986	down
bta-miR-574	0.852636	up	novel_circ_003262	-3.45725	down
bta-miR-574	0.852636	up	novel_circ_003305	-1.5998	down
bta-miR-574	0.852636	up	novel_circ_003608	-3.35138	down
bta-miR-574	0.852636	up	novel_circ_003627	-2.4812	down
bta-miR-574	0.852636	up	novel_circ_003635	-2.02298	down
bta-miR-574	0.852636	up	novel_circ_003863	-2.96941	down
bta-miR-574	0.852636	up	novel_circ_003929	-19.1506	down
bta-miR-574	0.852636	up	novel_circ_004280	-18.7533	down
bta-miR-6535	1.89011	up	novel_circ_000224	-3.1526	down
bta-miR-6535	1.89011	up	novel_circ_000227	-2.18925	down
bta-miR-6535	1.89011	up	novel_circ_000237	-2.57564	down
bta-miR-6535	1.89011	up	novel_circ_000246	-2.02038	down
bta-miR-342	0.282089	up	novel_circ_000720	-3.51288	down
bta-miR-6535	1.89011	up	novel_circ_000696	-2.36984	down
bta-miR-6535	1.89011	up	novel_circ_000704	-19.091	down
bta-miR-3432a	0.496315	up	novel_circ_000720	-3.51288	down
bta-miR-6535	1.89011	up	novel_circ_000844	-19.0959	down
bta-miR-6535	1.89011	up	novel_circ_000847	-3.28825	down
bta-miR-6535	1.89011	up	novel_circ_000848	-2.75279	down
bta-miR-6535	1.89011	up	novel_circ_000876	-1.97713	down
bta-miR-6535	1.89011	up	novel_circ_001043	-1.08228	down
bta-miR-6535	1.89011	up	novel_circ_001209	-18.7773	down
bta-miR-6535	1.89011	up	novel_circ_001267	-19.6809	down
bta-miR-6535	1.89011	up	novel_circ_001300	-18.6765	down
bta-miR-6535	1.89011	up	novel_circ_001344	-3.07672	down
bta-miR-6535	1.89011	up	novel_circ_001457	-18.7289	down
bta-miR-6535	1.89011	up	novel_circ_001459	-2.59308	down
bta-miR-6535	1.89011	up	novel_circ_001533	-2.0915	down
bta-miR-6535	1.89011	up	novel_circ_001549	-18.7522	down
bta-miR-6535	1.89011	up	novel_circ_001669	-1.33689	down
bta-miR-6535	1.89011	up	novel_circ_001681	-1.40692	down
bta-miR-6535	1.89011	up	novel_circ_002262	-18.7278	down
bta-miR-6535	1.89011	up	novel_circ_002379	-19.0959	down
bta-miR-6535	1.89011	up	novel_circ_002424	-18.6743	down
bta-miR-6535	1.89011	up	novel_circ_002475	-18.6743	down
bta-miR-6535	1.89011	up	novel_circ_002477	-19.1506	down
bta-miR-6535	1.89011	up	novel_circ_002480	-18.7522	down
bta-miR-6535	1.89011	up	novel_circ_002745	-18.6809	down
bta-miR-6535	1.89011	up	novel_circ_002764	-18.7299	down
bta-miR-6535	1.89011	up	novel_circ_002790	-18.6743	down
bta-miR-6535	1.89011	up	novel_circ_002834	-18.8262	down
bta-miR-6535	1.89011	up	novel_circ_002958	-1.66316	down
bta-miR-6535	1.89011	up	novel_circ_003014	-1.53114	down
bta-miR-6535	1.89011	up	novel_circ_003024	-18.7299	down
bta-miR-6535	1.89011	up	novel_circ_003156	-18.8986	down
bta-miR-6535	1.89011	up	novel_circ_003262	-3.45725	down
bta-miR-6535	1.89011	up	novel_circ_003305	-1.5998	down
bta-miR-6535	1.89011	up	novel_circ_003608	-3.35138	down
bta-miR-6535	1.89011	up	novel_circ_003635	-2.02298	down
bta-miR-6535	1.89011	up	novel_circ_003863	-2.96941	down
bta-miR-6535	1.89011	up	novel_circ_003867	-0.69489	down
bta-miR-6535	1.89011	up	novel_circ_003929	-19.1506	down
bta-miR-6535	1.89011	up	novel_circ_004280	-18.7533	down
bta-miR-671	0.708016	up	novel_circ_000224	-3.1526	down
bta-miR-671	0.708016	up	novel_circ_000227	-2.18925	down
bta-miR-671	0.708016	up	novel_circ_000237	-2.57564	down
bta-miR-671	0.708016	up	novel_circ_000246	-2.02038	down
bta-miR-425-5p	0.13152	up	novel_circ_000720	-3.51288	down
bta-miR-671	0.708016	up	novel_circ_000696	-2.36984	down
bta-miR-671	0.708016	up	novel_circ_000704	-19.091	down
bta-miR-574	0.852636	up	novel_circ_000720	-3.51288	down
bta-miR-671	0.708016	up	novel_circ_000844	-19.0959	down
bta-miR-671	0.708016	up	novel_circ_000847	-3.28825	down
bta-miR-671	0.708016	up	novel_circ_000848	-2.75279	down
bta-miR-671	0.708016	up	novel_circ_000876	-1.97713	down
bta-miR-671	0.708016	up	novel_circ_001043	-1.08228	down
bta-miR-671	0.708016	up	novel_circ_001267	-19.6809	down
bta-miR-671	0.708016	up	novel_circ_001300	-18.6765	down
bta-miR-671	0.708016	up	novel_circ_001344	-3.07672	down
bta-miR-671	0.708016	up	novel_circ_001457	-18.7289	down
bta-miR-671	0.708016	up	novel_circ_001459	-2.59308	down
bta-miR-671	0.708016	up	novel_circ_001533	-2.0915	down
bta-miR-671	0.708016	up	novel_circ_001549	-18.7522	down
bta-miR-671	0.708016	up	novel_circ_001669	-1.33689	down
bta-miR-671	0.708016	up	novel_circ_001681	-1.40692	down
bta-miR-671	0.708016	up	novel_circ_002262	-18.7278	down
bta-miR-671	0.708016	up	novel_circ_002379	-19.0959	down
bta-miR-671	0.708016	up	novel_circ_002424	-18.6743	down
bta-miR-671	0.708016	up	novel_circ_002475	-18.6743	down
bta-miR-671	0.708016	up	novel_circ_002477	-19.1506	down
bta-miR-671	0.708016	up	novel_circ_002480	-18.7522	down
bta-miR-671	0.708016	up	novel_circ_002745	-18.6809	down
bta-miR-671	0.708016	up	novel_circ_002764	-18.7299	down
bta-miR-671	0.708016	up	novel_circ_002790	-18.6743	down
bta-miR-671	0.708016	up	novel_circ_002958	-1.66316	down
bta-miR-671	0.708016	up	novel_circ_003014	-1.53114	down
bta-miR-671	0.708016	up	novel_circ_003024	-18.7299	down
bta-miR-671	0.708016	up	novel_circ_003156	-18.8986	down
bta-miR-671	0.708016	up	novel_circ_003262	-3.45725	down
bta-miR-671	0.708016	up	novel_circ_003305	-1.5998	down
bta-miR-671	0.708016	up	novel_circ_003608	-3.35138	down
bta-miR-671	0.708016	up	novel_circ_003627	-2.4812	down
bta-miR-671	0.708016	up	novel_circ_003635	-2.02298	down
bta-miR-671	0.708016	up	novel_circ_003863	-2.96941	down
bta-miR-671	0.708016	up	novel_circ_003867	-0.69489	down
bta-miR-671	0.708016	up	novel_circ_003929	-19.1506	down
bta-miR-671	0.708016	up	novel_circ_004280	-18.7533	down
bta-miR-769	0.173028	up	novel_circ_000227	-2.18925	down
bta-miR-769	0.173028	up	novel_circ_000237	-2.57564	down
bta-miR-769	0.173028	up	novel_circ_000246	-2.02038	down
bta-miR-6535	1.89011	up	novel_circ_000720	-3.51288	down
bta-miR-769	0.173028	up	novel_circ_000696	-2.36984	down
bta-miR-769	0.173028	up	novel_circ_000844	-19.0959	down
bta-miR-769	0.173028	up	novel_circ_000847	-3.28825	down
bta-miR-769	0.173028	up	novel_circ_000848	-2.75279	down
bta-miR-769	0.173028	up	novel_circ_000876	-1.97713	down
bta-miR-769	0.173028	up	novel_circ_001267	-19.6809	down
bta-miR-769	0.173028	up	novel_circ_001344	-3.07672	down
bta-miR-769	0.173028	up	novel_circ_001459	-2.59308	down
bta-miR-769	0.173028	up	novel_circ_001549	-18.7522	down
bta-miR-769	0.173028	up	novel_circ_001669	-1.33689	down
bta-miR-769	0.173028	up	novel_circ_001681	-1.40692	down
bta-miR-769	0.173028	up	novel_circ_002262	-18.7278	down
bta-miR-769	0.173028	up	novel_circ_002379	-19.0959	down
bta-miR-769	0.173028	up	novel_circ_002477	-19.1506	down
bta-miR-769	0.173028	up	novel_circ_002480	-18.7522	down
bta-miR-769	0.173028	up	novel_circ_002745	-18.6809	down
bta-miR-769	0.173028	up	novel_circ_002764	-18.7299	down
bta-miR-769	0.173028	up	novel_circ_002958	-1.66316	down
bta-miR-769	0.173028	up	novel_circ_003014	-1.53114	down
bta-miR-769	0.173028	up	novel_circ_003024	-18.7299	down
bta-miR-769	0.173028	up	novel_circ_003305	-1.5998	down
bta-miR-769	0.173028	up	novel_circ_003863	-2.96941	down
bta-miR-769	0.173028	up	novel_circ_003867	-0.69489	down
bta-miR-769	0.173028	up	novel_circ_003929	-19.1506	down
bta-miR-92b	0.256806	up	novel_circ_000224	-3.1526	down
bta-miR-92b	0.256806	up	novel_circ_000227	-2.18925	down
bta-miR-92b	0.256806	up	novel_circ_000237	-2.57564	down
bta-miR-92b	0.256806	up	novel_circ_000246	-2.02038	down
bta-miR-671	0.708016	up	novel_circ_000720	-3.51288	down
bta-miR-92b	0.256806	up	novel_circ_000696	-2.36984	down
bta-miR-92b	0.256806	up	novel_circ_000704	-19.091	down
bta-miR-92b	0.256806	up	novel_circ_000720	-3.51288	down
bta-miR-92b	0.256806	up	novel_circ_000844	-19.0959	down
bta-miR-92b	0.256806	up	novel_circ_000847	-3.28825	down
bta-miR-92b	0.256806	up	novel_circ_000848	-2.75279	down
bta-miR-92b	0.256806	up	novel_circ_000876	-1.97713	down
bta-miR-92b	0.256806	up	novel_circ_001043	-1.08228	down
bta-miR-92b	0.256806	up	novel_circ_001209	-18.7773	down
bta-miR-92b	0.256806	up	novel_circ_001267	-19.6809	down
bta-miR-92b	0.256806	up	novel_circ_001300	-18.6765	down
bta-miR-92b	0.256806	up	novel_circ_001344	-3.07672	down
bta-miR-92b	0.256806	up	novel_circ_001457	-18.7289	down
bta-miR-92b	0.256806	up	novel_circ_001459	-2.59308	down
bta-miR-92b	0.256806	up	novel_circ_001533	-2.0915	down
bta-miR-92b	0.256806	up	novel_circ_001549	-18.7522	down
bta-miR-92b	0.256806	up	novel_circ_001669	-1.33689	down
bta-miR-92b	0.256806	up	novel_circ_001681	-1.40692	down
bta-miR-92b	0.256806	up	novel_circ_002262	-18.7278	down
bta-miR-92b	0.256806	up	novel_circ_002379	-19.0959	down
bta-miR-92b	0.256806	up	novel_circ_002424	-18.6743	down
bta-miR-92b	0.256806	up	novel_circ_002477	-19.1506	down
bta-miR-92b	0.256806	up	novel_circ_002480	-18.7522	down
bta-miR-92b	0.256806	up	novel_circ_002745	-18.6809	down
bta-miR-92b	0.256806	up	novel_circ_002764	-18.7299	down
bta-miR-92b	0.256806	up	novel_circ_002834	-18.8262	down
bta-miR-92b	0.256806	up	novel_circ_002958	-1.66316	down
bta-miR-92b	0.256806	up	novel_circ_003014	-1.53114	down
bta-miR-92b	0.256806	up	novel_circ_003024	-18.7299	down
bta-miR-92b	0.256806	up	novel_circ_003156	-18.8986	down
bta-miR-92b	0.256806	up	novel_circ_003262	-3.45725	down
bta-miR-92b	0.256806	up	novel_circ_003305	-1.5998	down
bta-miR-92b	0.256806	up	novel_circ_003608	-3.35138	down
bta-miR-92b	0.256806	up	novel_circ_003635	-2.02298	down
bta-miR-92b	0.256806	up	novel_circ_003863	-2.96941	down
bta-miR-92b	0.256806	up	novel_circ_003929	-19.1506	down
bta-miR-92b	0.256806	up	novel_circ_004280	-18.7533	down
bta-miR-106a	-1.43558	down	novel_circ_000016	18.5467	up
bta-miR-106a	-1.43558	down	novel_circ_000201	2.18805	up
bta-miR-106a	-1.43558	down	novel_circ_000259	18.8585	up
bta-miR-106a	-1.43558	down	novel_circ_000408	18.7649	up
bta-miR-106a	-1.43558	down	novel_circ_000493	3.31806	up
bta-miR-106a	-1.43558	down	novel_circ_000627	2.78656	up
bta-miR-106a	-1.43558	down	novel_circ_000660	0.948296	up
bta-miR-106a	-1.43558	down	novel_circ_000866	3.00507	up
bta-miR-106a	-1.43558	down	novel_circ_000928	2.62621	up
bta-miR-106a	-1.43558	down	novel_circ_000933	18.562	up
bta-miR-106a	-1.43558	down	novel_circ_000980	2.1647	up
bta-miR-106a	-1.43558	down	novel_circ_000987	18.6069	up
bta-miR-106a	-1.43558	down	novel_circ_001049	19.4416	up
bta-miR-106a	-1.43558	down	novel_circ_001165	18.4135	up
bta-miR-106a	-1.43558	down	novel_circ_001229	18.9882	up
bta-miR-106a	-1.43558	down	novel_circ_001245	2.06362	up
bta-miR-106a	-1.43558	down	novel_circ_001256	19.2394	up
bta-miR-106a	-1.43558	down	novel_circ_001318	2.19141	up
bta-miR-106a	-1.43558	down	novel_circ_001338	1.66481	up
bta-miR-106a	-1.43558	down	novel_circ_001435	18.6692	up
bta-miR-106a	-1.43558	down	novel_circ_001595	18.5263	up
bta-miR-106a	-1.43558	down	novel_circ_001806	18.711	up
bta-miR-106a	-1.43558	down	novel_circ_001814	2.25459	up
bta-miR-106a	-1.43558	down	novel_circ_001886	18.7473	up
bta-miR-106a	-1.43558	down	novel_circ_001900	18.5056	up
bta-miR-106a	-1.43558	down	novel_circ_001980	18.4513	up
bta-miR-106a	-1.43558	down	novel_circ_001990	2.81509	up
bta-miR-106a	-1.43558	down	novel_circ_002263	2.79487	up
bta-miR-106a	-1.43558	down	novel_circ_002385	18.6262	up
bta-miR-106a	-1.43558	down	novel_circ_002459	19.516	up
bta-miR-106a	-1.43558	down	novel_circ_002533	2.80528	up
bta-miR-106a	-1.43558	down	novel_circ_002584	0.485879	up
bta-miR-106a	-1.43558	down	novel_circ_002587	2.9325	up
bta-miR-106a	-1.43558	down	novel_circ_002608	3.84436	up
bta-miR-106a	-1.43558	down	novel_circ_002631	18.6928	up
bta-miR-106a	-1.43558	down	novel_circ_002632	1.79729	up
bta-miR-106a	-1.43558	down	novel_circ_002840	2.80921	up
bta-miR-106a	-1.43558	down	novel_circ_002867	18.7869	up
bta-miR-106a	-1.43558	down	novel_circ_002876	18.4845	up
bta-miR-106a	-1.43558	down	novel_circ_002965	18.7697	up
bta-miR-106a	-1.43558	down	novel_circ_003020	18.804	up
bta-miR-106a	-1.43558	down	novel_circ_003040	18.5263	up
bta-miR-106a	-1.43558	down	novel_circ_003130	18.5873	up
bta-miR-106a	-1.43558	down	novel_circ_003199	18.8908	up
bta-miR-106a	-1.43558	down	novel_circ_003284	18.6978	up
bta-miR-106a	-1.43558	down	novel_circ_003292	18.716	up
bta-miR-106a	-1.43558	down	novel_circ_003355	2.87046	up
bta-miR-106a	-1.43558	down	novel_circ_003400	1.83434	up
bta-miR-106a	-1.43558	down	novel_circ_003401	18.5467	up
bta-miR-106a	-1.43558	down	novel_circ_003595	2.12889	up
bta-miR-1296	-0.60899	down	novel_circ_002584	0.485879	up
bta-miR-106a	-1.43558	down	novel_circ_003752	2.18936	up
bta-miR-106a	-1.43558	down	novel_circ_003951	0.751195	up
bta-miR-106a	-1.43558	down	novel_circ_003958	18.8255	up
bta-miR-106a	-1.43558	down	novel_circ_004067	18.5927	up
bta-miR-106a	-1.43558	down	novel_circ_004264	18.4845	up
bta-miR-106a	-1.43558	down	novel_circ_004320	18.5467	up
bta-miR-106a	-1.43558	down	novel_circ_004321	18.5056	up
bta-miR-143	-1.15023	down	novel_circ_002584	0.485879	up
bta-miR-106a	-1.43558	down	novel_circ_004338	18.5675	up
bta-miR-1296	-0.60899	down	novel_circ_000016	18.5467	up
bta-miR-1296	-0.60899	down	novel_circ_000201	2.18805	up
bta-miR-1296	-0.60899	down	novel_circ_000259	18.8585	up
bta-miR-1296	-0.60899	down	novel_circ_000408	18.7649	up
bta-miR-1296	-0.60899	down	novel_circ_000493	3.31806	up
bta-miR-1296	-0.60899	down	novel_circ_000627	2.78656	up
bta-miR-1296	-0.60899	down	novel_circ_000660	0.948296	up
bta-miR-1296	-0.60899	down	novel_circ_000866	3.00507	up
bta-miR-1296	-0.60899	down	novel_circ_000928	2.62621	up
bta-miR-1296	-0.60899	down	novel_circ_000933	18.562	up
bta-miR-1296	-0.60899	down	novel_circ_000980	2.1647	up
bta-miR-1296	-0.60899	down	novel_circ_000987	18.6069	up
bta-miR-1296	-0.60899	down	novel_circ_001049	19.4416	up
bta-miR-1296	-0.60899	down	novel_circ_001165	18.4135	up
bta-miR-1296	-0.60899	down	novel_circ_001229	18.9882	up
bta-miR-1296	-0.60899	down	novel_circ_001245	2.06362	up
bta-miR-1296	-0.60899	down	novel_circ_001256	19.2394	up
bta-miR-1296	-0.60899	down	novel_circ_001318	2.19141	up
bta-miR-1296	-0.60899	down	novel_circ_001338	1.66481	up
bta-miR-1296	-0.60899	down	novel_circ_001435	18.6692	up
bta-miR-1296	-0.60899	down	novel_circ_001595	18.5263	up
bta-miR-1296	-0.60899	down	novel_circ_001806	18.711	up
bta-miR-1296	-0.60899	down	novel_circ_001814	2.25459	up
bta-miR-1296	-0.60899	down	novel_circ_001886	18.7473	up
bta-miR-1296	-0.60899	down	novel_circ_001900	18.5056	up
bta-miR-1296	-0.60899	down	novel_circ_001980	18.4513	up
bta-miR-1296	-0.60899	down	novel_circ_001990	2.81509	up
bta-miR-1296	-0.60899	down	novel_circ_002263	2.79487	up
bta-miR-1296	-0.60899	down	novel_circ_002385	18.6262	up
bta-miR-1296	-0.60899	down	novel_circ_002459	19.516	up
bta-miR-1296	-0.60899	down	novel_circ_002533	2.80528	up
bta-miR-144	-1.85223	down	novel_circ_002584	0.485879	up
bta-miR-1296	-0.60899	down	novel_circ_002587	2.9325	up
bta-miR-1296	-0.60899	down	novel_circ_002608	3.84436	up
bta-miR-1296	-0.60899	down	novel_circ_002631	18.6928	up
bta-miR-1296	-0.60899	down	novel_circ_002632	1.79729	up
bta-miR-1296	-0.60899	down	novel_circ_002840	2.80921	up
bta-miR-1296	-0.60899	down	novel_circ_002867	18.7869	up
bta-miR-1296	-0.60899	down	novel_circ_002876	18.4845	up
bta-miR-1296	-0.60899	down	novel_circ_002965	18.7697	up
bta-miR-1296	-0.60899	down	novel_circ_003020	18.804	up
bta-miR-1296	-0.60899	down	novel_circ_003040	18.5263	up
bta-miR-1296	-0.60899	down	novel_circ_003130	18.5873	up
bta-miR-1296	-0.60899	down	novel_circ_003199	18.8908	up
bta-miR-1296	-0.60899	down	novel_circ_003284	18.6978	up
bta-miR-1296	-0.60899	down	novel_circ_003292	18.716	up
bta-miR-1296	-0.60899	down	novel_circ_003355	2.87046	up
bta-miR-1296	-0.60899	down	novel_circ_003400	1.83434	up
bta-miR-1296	-0.60899	down	novel_circ_003401	18.5467	up
bta-miR-1296	-0.60899	down	novel_circ_003595	2.12889	up
bta-miR-152	-0.54212	down	novel_circ_002584	0.485879	up
bta-miR-1296	-0.60899	down	novel_circ_003752	2.18936	up
bta-miR-1296	-0.60899	down	novel_circ_003951	0.751195	up
bta-miR-1296	-0.60899	down	novel_circ_003958	18.8255	up
bta-miR-1296	-0.60899	down	novel_circ_004067	18.5927	up
bta-miR-1296	-0.60899	down	novel_circ_004264	18.4845	up
bta-miR-1296	-0.60899	down	novel_circ_004320	18.5467	up
bta-miR-1296	-0.60899	down	novel_circ_004321	18.5056	up
bta-miR-200a	-0.56016	down	novel_circ_002584	0.485879	up
bta-miR-1296	-0.60899	down	novel_circ_004338	18.5675	up
bta-miR-143	-1.15023	down	novel_circ_000016	18.5467	up
bta-miR-143	-1.15023	down	novel_circ_000201	2.18805	up
bta-miR-143	-1.15023	down	novel_circ_000259	18.8585	up
bta-miR-143	-1.15023	down	novel_circ_000408	18.7649	up
bta-miR-143	-1.15023	down	novel_circ_000493	3.31806	up
bta-miR-143	-1.15023	down	novel_circ_000627	2.78656	up
bta-miR-143	-1.15023	down	novel_circ_000660	0.948296	up
bta-miR-143	-1.15023	down	novel_circ_000866	3.00507	up
bta-miR-143	-1.15023	down	novel_circ_000928	2.62621	up
bta-miR-143	-1.15023	down	novel_circ_000933	18.562	up
bta-miR-143	-1.15023	down	novel_circ_000980	2.1647	up
bta-miR-143	-1.15023	down	novel_circ_000987	18.6069	up
bta-miR-143	-1.15023	down	novel_circ_001049	19.4416	up
bta-miR-143	-1.15023	down	novel_circ_001165	18.4135	up
bta-miR-143	-1.15023	down	novel_circ_001229	18.9882	up
bta-miR-143	-1.15023	down	novel_circ_001245	2.06362	up
bta-miR-143	-1.15023	down	novel_circ_001256	19.2394	up
bta-miR-143	-1.15023	down	novel_circ_001318	2.19141	up
bta-miR-143	-1.15023	down	novel_circ_001338	1.66481	up
bta-miR-143	-1.15023	down	novel_circ_001435	18.6692	up
bta-miR-143	-1.15023	down	novel_circ_001595	18.5263	up
bta-miR-143	-1.15023	down	novel_circ_001806	18.711	up
bta-miR-143	-1.15023	down	novel_circ_001814	2.25459	up
bta-miR-143	-1.15023	down	novel_circ_001886	18.7473	up
bta-miR-143	-1.15023	down	novel_circ_001900	18.5056	up
bta-miR-143	-1.15023	down	novel_circ_001980	18.4513	up
bta-miR-143	-1.15023	down	novel_circ_001990	2.81509	up
bta-miR-143	-1.15023	down	novel_circ_002263	2.79487	up
bta-miR-143	-1.15023	down	novel_circ_002385	18.6262	up
bta-miR-143	-1.15023	down	novel_circ_002459	19.516	up
bta-miR-143	-1.15023	down	novel_circ_002533	2.80528	up
bta-miR-2285bf	-5.79961	down	novel_circ_002584	0.485879	up
bta-miR-143	-1.15023	down	novel_circ_002587	2.9325	up
bta-miR-143	-1.15023	down	novel_circ_002608	3.84436	up
bta-miR-143	-1.15023	down	novel_circ_002631	18.6928	up
bta-miR-143	-1.15023	down	novel_circ_002632	1.79729	up
bta-miR-143	-1.15023	down	novel_circ_002840	2.80921	up
bta-miR-143	-1.15023	down	novel_circ_002867	18.7869	up
bta-miR-143	-1.15023	down	novel_circ_002876	18.4845	up
bta-miR-143	-1.15023	down	novel_circ_002965	18.7697	up
bta-miR-143	-1.15023	down	novel_circ_003020	18.804	up
bta-miR-143	-1.15023	down	novel_circ_003040	18.5263	up
bta-miR-143	-1.15023	down	novel_circ_003130	18.5873	up
bta-miR-143	-1.15023	down	novel_circ_003199	18.8908	up
bta-miR-143	-1.15023	down	novel_circ_003284	18.6978	up
bta-miR-143	-1.15023	down	novel_circ_003292	18.716	up
bta-miR-143	-1.15023	down	novel_circ_003355	2.87046	up
bta-miR-143	-1.15023	down	novel_circ_003400	1.83434	up
bta-miR-143	-1.15023	down	novel_circ_003401	18.5467	up
bta-miR-143	-1.15023	down	novel_circ_003595	2.12889	up
bta-miR-2303	-1.74816	down	novel_circ_002584	0.485879	up
bta-miR-143	-1.15023	down	novel_circ_003752	2.18936	up
bta-miR-143	-1.15023	down	novel_circ_003951	0.751195	up
bta-miR-143	-1.15023	down	novel_circ_003958	18.8255	up
bta-miR-143	-1.15023	down	novel_circ_004067	18.5927	up
bta-miR-143	-1.15023	down	novel_circ_004264	18.4845	up
bta-miR-143	-1.15023	down	novel_circ_004320	18.5467	up
bta-miR-143	-1.15023	down	novel_circ_004321	18.5056	up
bta-miR-2408	-6.06544	down	novel_circ_002584	0.485879	up
bta-miR-143	-1.15023	down	novel_circ_004338	18.5675	up
bta-miR-144	-1.85223	down	novel_circ_000016	18.5467	up
bta-miR-144	-1.85223	down	novel_circ_000201	2.18805	up
bta-miR-144	-1.85223	down	novel_circ_000259	18.8585	up
bta-miR-144	-1.85223	down	novel_circ_000408	18.7649	up
bta-miR-144	-1.85223	down	novel_circ_000493	3.31806	up
bta-miR-144	-1.85223	down	novel_circ_000627	2.78656	up
bta-miR-144	-1.85223	down	novel_circ_000660	0.948296	up
bta-miR-144	-1.85223	down	novel_circ_000866	3.00507	up
bta-miR-144	-1.85223	down	novel_circ_000928	2.62621	up
bta-miR-144	-1.85223	down	novel_circ_000933	18.562	up
bta-miR-144	-1.85223	down	novel_circ_000980	2.1647	up
bta-miR-144	-1.85223	down	novel_circ_000987	18.6069	up
bta-miR-144	-1.85223	down	novel_circ_001049	19.4416	up
bta-miR-144	-1.85223	down	novel_circ_001165	18.4135	up
bta-miR-144	-1.85223	down	novel_circ_001229	18.9882	up
bta-miR-144	-1.85223	down	novel_circ_001245	2.06362	up
bta-miR-144	-1.85223	down	novel_circ_001256	19.2394	up
bta-miR-144	-1.85223	down	novel_circ_001318	2.19141	up
bta-miR-144	-1.85223	down	novel_circ_001338	1.66481	up
bta-miR-144	-1.85223	down	novel_circ_001435	18.6692	up
bta-miR-144	-1.85223	down	novel_circ_001595	18.5263	up
bta-miR-144	-1.85223	down	novel_circ_001806	18.711	up
bta-miR-144	-1.85223	down	novel_circ_001814	2.25459	up
bta-miR-144	-1.85223	down	novel_circ_001886	18.7473	up
bta-miR-144	-1.85223	down	novel_circ_001900	18.5056	up
bta-miR-144	-1.85223	down	novel_circ_001980	18.4513	up
bta-miR-144	-1.85223	down	novel_circ_001990	2.81509	up
bta-miR-144	-1.85223	down	novel_circ_002263	2.79487	up
bta-miR-144	-1.85223	down	novel_circ_002385	18.6262	up
bta-miR-144	-1.85223	down	novel_circ_002459	19.516	up
bta-miR-144	-1.85223	down	novel_circ_002533	2.80528	up
bta-miR-31	-0.57492	down	novel_circ_002584	0.485879	up
bta-miR-144	-1.85223	down	novel_circ_002587	2.9325	up
bta-miR-144	-1.85223	down	novel_circ_002608	3.84436	up
bta-miR-144	-1.85223	down	novel_circ_002631	18.6928	up
bta-miR-144	-1.85223	down	novel_circ_002632	1.79729	up
bta-miR-144	-1.85223	down	novel_circ_002840	2.80921	up
bta-miR-144	-1.85223	down	novel_circ_002867	18.7869	up
bta-miR-144	-1.85223	down	novel_circ_002876	18.4845	up
bta-miR-144	-1.85223	down	novel_circ_002965	18.7697	up
bta-miR-144	-1.85223	down	novel_circ_003020	18.804	up
bta-miR-144	-1.85223	down	novel_circ_003040	18.5263	up
bta-miR-144	-1.85223	down	novel_circ_003130	18.5873	up
bta-miR-144	-1.85223	down	novel_circ_003199	18.8908	up
bta-miR-144	-1.85223	down	novel_circ_003284	18.6978	up
bta-miR-144	-1.85223	down	novel_circ_003292	18.716	up
bta-miR-144	-1.85223	down	novel_circ_003355	2.87046	up
bta-miR-144	-1.85223	down	novel_circ_003400	1.83434	up
bta-miR-144	-1.85223	down	novel_circ_003401	18.5467	up
bta-miR-144	-1.85223	down	novel_circ_003595	2.12889	up
bta-miR-3613a	-0.65677	down	novel_circ_002584	0.485879	up
bta-miR-144	-1.85223	down	novel_circ_003752	2.18936	up
bta-miR-144	-1.85223	down	novel_circ_003951	0.751195	up
bta-miR-144	-1.85223	down	novel_circ_003958	18.8255	up
bta-miR-144	-1.85223	down	novel_circ_004067	18.5927	up
bta-miR-144	-1.85223	down	novel_circ_004264	18.4845	up
bta-miR-144	-1.85223	down	novel_circ_004320	18.5467	up
bta-miR-144	-1.85223	down	novel_circ_004321	18.5056	up
bta-miR-451	-1.9016	down	novel_circ_002584	0.485879	up
bta-miR-144	-1.85223	down	novel_circ_004338	18.5675	up
bta-miR-152	-0.54212	down	novel_circ_000016	18.5467	up
bta-miR-152	-0.54212	down	novel_circ_000201	2.18805	up
bta-miR-152	-0.54212	down	novel_circ_000259	18.8585	up
bta-miR-152	-0.54212	down	novel_circ_000408	18.7649	up
bta-miR-152	-0.54212	down	novel_circ_000493	3.31806	up
bta-miR-152	-0.54212	down	novel_circ_000627	2.78656	up
bta-miR-152	-0.54212	down	novel_circ_000660	0.948296	up
bta-miR-152	-0.54212	down	novel_circ_000866	3.00507	up
bta-miR-152	-0.54212	down	novel_circ_000928	2.62621	up
bta-miR-152	-0.54212	down	novel_circ_000933	18.562	up
bta-miR-152	-0.54212	down	novel_circ_000980	2.1647	up
bta-miR-152	-0.54212	down	novel_circ_000987	18.6069	up
bta-miR-152	-0.54212	down	novel_circ_001049	19.4416	up
bta-miR-152	-0.54212	down	novel_circ_001165	18.4135	up
bta-miR-152	-0.54212	down	novel_circ_001229	18.9882	up
bta-miR-152	-0.54212	down	novel_circ_001245	2.06362	up
bta-miR-152	-0.54212	down	novel_circ_001256	19.2394	up
bta-miR-152	-0.54212	down	novel_circ_001318	2.19141	up
bta-miR-152	-0.54212	down	novel_circ_001338	1.66481	up
bta-miR-152	-0.54212	down	novel_circ_001435	18.6692	up
bta-miR-152	-0.54212	down	novel_circ_001595	18.5263	up
bta-miR-152	-0.54212	down	novel_circ_001806	18.711	up
bta-miR-152	-0.54212	down	novel_circ_001814	2.25459	up
bta-miR-152	-0.54212	down	novel_circ_001886	18.7473	up
bta-miR-152	-0.54212	down	novel_circ_001900	18.5056	up
bta-miR-152	-0.54212	down	novel_circ_001980	18.4513	up
bta-miR-152	-0.54212	down	novel_circ_001990	2.81509	up
bta-miR-152	-0.54212	down	novel_circ_002263	2.79487	up
bta-miR-152	-0.54212	down	novel_circ_002385	18.6262	up
bta-miR-152	-0.54212	down	novel_circ_002459	19.516	up
bta-miR-152	-0.54212	down	novel_circ_002533	2.80528	up
bta-miR-497	-0.74868	down	novel_circ_002584	0.485879	up
bta-miR-152	-0.54212	down	novel_circ_002587	2.9325	up
bta-miR-152	-0.54212	down	novel_circ_002608	3.84436	up
bta-miR-152	-0.54212	down	novel_circ_002631	18.6928	up
bta-miR-152	-0.54212	down	novel_circ_002632	1.79729	up
bta-miR-152	-0.54212	down	novel_circ_002840	2.80921	up
bta-miR-152	-0.54212	down	novel_circ_002867	18.7869	up
bta-miR-152	-0.54212	down	novel_circ_002876	18.4845	up
bta-miR-152	-0.54212	down	novel_circ_002965	18.7697	up
bta-miR-152	-0.54212	down	novel_circ_003020	18.804	up
bta-miR-152	-0.54212	down	novel_circ_003040	18.5263	up
bta-miR-152	-0.54212	down	novel_circ_003130	18.5873	up
bta-miR-152	-0.54212	down	novel_circ_003199	18.8908	up
bta-miR-152	-0.54212	down	novel_circ_003284	18.6978	up
bta-miR-152	-0.54212	down	novel_circ_003292	18.716	up
bta-miR-152	-0.54212	down	novel_circ_003355	2.87046	up
bta-miR-152	-0.54212	down	novel_circ_003400	1.83434	up
bta-miR-152	-0.54212	down	novel_circ_003401	18.5467	up
bta-miR-152	-0.54212	down	novel_circ_003595	2.12889	up
bta-miR-503-3p	-0.97251	down	novel_circ_002584	0.485879	up
bta-miR-152	-0.54212	down	novel_circ_003752	2.18936	up
bta-miR-152	-0.54212	down	novel_circ_003951	0.751195	up
bta-miR-152	-0.54212	down	novel_circ_003958	18.8255	up
bta-miR-152	-0.54212	down	novel_circ_004067	18.5927	up
bta-miR-152	-0.54212	down	novel_circ_004264	18.4845	up
bta-miR-152	-0.54212	down	novel_circ_004320	18.5467	up
bta-miR-152	-0.54212	down	novel_circ_004321	18.5056	up
bta-miR-6119-3p	-0.62165	down	novel_circ_002584	0.485879	up
bta-miR-152	-0.54212	down	novel_circ_004338	18.5675	up
bta-miR-200a	-0.56016	down	novel_circ_000016	18.5467	up
bta-miR-200a	-0.56016	down	novel_circ_000201	2.18805	up
bta-miR-200a	-0.56016	down	novel_circ_000259	18.8585	up
bta-miR-200a	-0.56016	down	novel_circ_000408	18.7649	up
bta-miR-200a	-0.56016	down	novel_circ_000493	3.31806	up
bta-miR-200a	-0.56016	down	novel_circ_000627	2.78656	up
bta-miR-200a	-0.56016	down	novel_circ_000660	0.948296	up
bta-miR-200a	-0.56016	down	novel_circ_000866	3.00507	up
bta-miR-200a	-0.56016	down	novel_circ_000928	2.62621	up
bta-miR-200a	-0.56016	down	novel_circ_000933	18.562	up
bta-miR-200a	-0.56016	down	novel_circ_000980	2.1647	up
bta-miR-200a	-0.56016	down	novel_circ_000987	18.6069	up
bta-miR-200a	-0.56016	down	novel_circ_001049	19.4416	up
bta-miR-200a	-0.56016	down	novel_circ_001165	18.4135	up
bta-miR-200a	-0.56016	down	novel_circ_001229	18.9882	up
bta-miR-200a	-0.56016	down	novel_circ_001245	2.06362	up
bta-miR-200a	-0.56016	down	novel_circ_001256	19.2394	up
bta-miR-200a	-0.56016	down	novel_circ_001318	2.19141	up
bta-miR-200a	-0.56016	down	novel_circ_001338	1.66481	up
bta-miR-200a	-0.56016	down	novel_circ_001435	18.6692	up
bta-miR-200a	-0.56016	down	novel_circ_001595	18.5263	up
bta-miR-200a	-0.56016	down	novel_circ_001806	18.711	up
bta-miR-200a	-0.56016	down	novel_circ_001886	18.7473	up
bta-miR-200a	-0.56016	down	novel_circ_001900	18.5056	up
bta-miR-200a	-0.56016	down	novel_circ_001980	18.4513	up
bta-miR-200a	-0.56016	down	novel_circ_001990	2.81509	up
bta-miR-200a	-0.56016	down	novel_circ_002263	2.79487	up
bta-miR-200a	-0.56016	down	novel_circ_002385	18.6262	up
bta-miR-200a	-0.56016	down	novel_circ_002459	19.516	up
bta-miR-200a	-0.56016	down	novel_circ_002533	2.80528	up
bta-miR-6119-5p	-0.58125	down	novel_circ_002584	0.485879	up
bta-miR-200a	-0.56016	down	novel_circ_002587	2.9325	up
bta-miR-200a	-0.56016	down	novel_circ_002608	3.84436	up
bta-miR-200a	-0.56016	down	novel_circ_002631	18.6928	up
bta-miR-200a	-0.56016	down	novel_circ_002632	1.79729	up
bta-miR-200a	-0.56016	down	novel_circ_002840	2.80921	up
bta-miR-200a	-0.56016	down	novel_circ_002867	18.7869	up
bta-miR-200a	-0.56016	down	novel_circ_002876	18.4845	up
bta-miR-200a	-0.56016	down	novel_circ_002965	18.7697	up
bta-miR-200a	-0.56016	down	novel_circ_003020	18.804	up
bta-miR-200a	-0.56016	down	novel_circ_003040	18.5263	up
bta-miR-200a	-0.56016	down	novel_circ_003130	18.5873	up
bta-miR-200a	-0.56016	down	novel_circ_003199	18.8908	up
bta-miR-200a	-0.56016	down	novel_circ_003284	18.6978	up
bta-miR-200a	-0.56016	down	novel_circ_003292	18.716	up
bta-miR-200a	-0.56016	down	novel_circ_003355	2.87046	up
bta-miR-200a	-0.56016	down	novel_circ_003400	1.83434	up
bta-miR-200a	-0.56016	down	novel_circ_003401	18.5467	up
bta-miR-200a	-0.56016	down	novel_circ_003595	2.12889	up
bta-miR-6121-3p	-1.09465	down	novel_circ_002584	0.485879	up
bta-miR-200a	-0.56016	down	novel_circ_003752	2.18936	up
bta-miR-200a	-0.56016	down	novel_circ_003951	0.751195	up
bta-miR-200a	-0.56016	down	novel_circ_003958	18.8255	up
bta-miR-200a	-0.56016	down	novel_circ_004067	18.5927	up
bta-miR-200a	-0.56016	down	novel_circ_004264	18.4845	up
bta-miR-200a	-0.56016	down	novel_circ_004320	18.5467	up
bta-miR-200a	-0.56016	down	novel_circ_004321	18.5056	up
bta-miR-106a	-1.43558	down	novel_circ_003707	1.33705	up
bta-miR-200a	-0.56016	down	novel_circ_004338	18.5675	up
bta-miR-2285bf	-5.79961	down	novel_circ_000016	18.5467	up
bta-miR-2285bf	-5.79961	down	novel_circ_000201	2.18805	up
bta-miR-2285bf	-5.79961	down	novel_circ_000259	18.8585	up
bta-miR-2285bf	-5.79961	down	novel_circ_000408	18.7649	up
bta-miR-2285bf	-5.79961	down	novel_circ_000493	3.31806	up
bta-miR-2285bf	-5.79961	down	novel_circ_000627	2.78656	up
bta-miR-2285bf	-5.79961	down	novel_circ_000660	0.948296	up
bta-miR-2285bf	-5.79961	down	novel_circ_000866	3.00507	up
bta-miR-2285bf	-5.79961	down	novel_circ_000928	2.62621	up
bta-miR-2285bf	-5.79961	down	novel_circ_000933	18.562	up
bta-miR-2285bf	-5.79961	down	novel_circ_000980	2.1647	up
bta-miR-2285bf	-5.79961	down	novel_circ_000987	18.6069	up
bta-miR-2285bf	-5.79961	down	novel_circ_001049	19.4416	up
bta-miR-2285bf	-5.79961	down	novel_circ_001165	18.4135	up
bta-miR-2285bf	-5.79961	down	novel_circ_001229	18.9882	up
bta-miR-2285bf	-5.79961	down	novel_circ_001245	2.06362	up
bta-miR-2285bf	-5.79961	down	novel_circ_001256	19.2394	up
bta-miR-2285bf	-5.79961	down	novel_circ_001318	2.19141	up
bta-miR-2285bf	-5.79961	down	novel_circ_001338	1.66481	up
bta-miR-2285bf	-5.79961	down	novel_circ_001435	18.6692	up
bta-miR-2285bf	-5.79961	down	novel_circ_001595	18.5263	up
bta-miR-2285bf	-5.79961	down	novel_circ_001806	18.711	up
bta-miR-2285bf	-5.79961	down	novel_circ_001814	2.25459	up
bta-miR-2285bf	-5.79961	down	novel_circ_001886	18.7473	up
bta-miR-2285bf	-5.79961	down	novel_circ_001900	18.5056	up
bta-miR-2285bf	-5.79961	down	novel_circ_001980	18.4513	up
bta-miR-2285bf	-5.79961	down	novel_circ_001990	2.81509	up
bta-miR-2285bf	-5.79961	down	novel_circ_002263	2.79487	up
bta-miR-2285bf	-5.79961	down	novel_circ_002385	18.6262	up
bta-miR-2285bf	-5.79961	down	novel_circ_002459	19.516	up
bta-miR-2285bf	-5.79961	down	novel_circ_002533	2.80528	up
bta-miR-1296	-0.60899	down	novel_circ_003707	1.33705	up
bta-miR-2285bf	-5.79961	down	novel_circ_002587	2.9325	up
bta-miR-2285bf	-5.79961	down	novel_circ_002608	3.84436	up
bta-miR-2285bf	-5.79961	down	novel_circ_002631	18.6928	up
bta-miR-2285bf	-5.79961	down	novel_circ_002632	1.79729	up
bta-miR-2285bf	-5.79961	down	novel_circ_002840	2.80921	up
bta-miR-2285bf	-5.79961	down	novel_circ_002867	18.7869	up
bta-miR-2285bf	-5.79961	down	novel_circ_002876	18.4845	up
bta-miR-2285bf	-5.79961	down	novel_circ_002965	18.7697	up
bta-miR-2285bf	-5.79961	down	novel_circ_003020	18.804	up
bta-miR-2285bf	-5.79961	down	novel_circ_003040	18.5263	up
bta-miR-2285bf	-5.79961	down	novel_circ_003130	18.5873	up
bta-miR-2285bf	-5.79961	down	novel_circ_003199	18.8908	up
bta-miR-2285bf	-5.79961	down	novel_circ_003284	18.6978	up
bta-miR-2285bf	-5.79961	down	novel_circ_003292	18.716	up
bta-miR-2285bf	-5.79961	down	novel_circ_003355	2.87046	up
bta-miR-2285bf	-5.79961	down	novel_circ_003400	1.83434	up
bta-miR-2285bf	-5.79961	down	novel_circ_003401	18.5467	up
bta-miR-2285bf	-5.79961	down	novel_circ_003595	2.12889	up
bta-miR-143	-1.15023	down	novel_circ_003707	1.33705	up
bta-miR-2285bf	-5.79961	down	novel_circ_003752	2.18936	up
bta-miR-2285bf	-5.79961	down	novel_circ_003951	0.751195	up
bta-miR-2285bf	-5.79961	down	novel_circ_003958	18.8255	up
bta-miR-2285bf	-5.79961	down	novel_circ_004067	18.5927	up
bta-miR-2285bf	-5.79961	down	novel_circ_004264	18.4845	up
bta-miR-2285bf	-5.79961	down	novel_circ_004320	18.5467	up
bta-miR-2285bf	-5.79961	down	novel_circ_004321	18.5056	up
bta-miR-144	-1.85223	down	novel_circ_003707	1.33705	up
bta-miR-2285bf	-5.79961	down	novel_circ_004338	18.5675	up
bta-miR-2303	-1.74816	down	novel_circ_000016	18.5467	up
bta-miR-2303	-1.74816	down	novel_circ_000201	2.18805	up
bta-miR-2303	-1.74816	down	novel_circ_000259	18.8585	up
bta-miR-2303	-1.74816	down	novel_circ_000408	18.7649	up
[truncated: 566 more rows]
