# Supplementary material for: Identification and functional analysis of circular RNAs during mitochondrial damage induced by infectious bovine rhinotracheitis virus infection in Madin–Darby bovine kidney cells
Source: Research Square preprint supplement (doi:10.21203/rs.3.rs-6754910/v1), 2025-06-20
Supplement: Supplementary file 18 [file c5f1ad4bf544b16ac8f5c6bd.xlsx]

## Sheet: Table S8
Table S8: GO enrichment analysis of source genes of differentially expressed circRNAs
class	GO ID	Description	out (114)	All (17432)	pvalue	p.adjust	Genes
Cellular Component	GO:0005737	cytoplasm	71	8954	0.012048	0.092639	ENSBTAG00000000241;ENSBTAG00000000700;ENSBTAG00000000830;ENSBTAG00000001057;ENSBTAG00000001280;ENSBTAG00000003052;ENSBTAG00000003185;ENSBTAG00000003746;ENSBTAG00000003876;ENSBTAG00000003934;ENSBTAG00000004315;ENSBTAG00000004448;ENSBTAG00000005362;ENSBTAG00000005442;ENSBTAG00000006031;ENSBTAG00000006158;ENSBTAG00000006323;ENSBTAG00000008153;ENSBTAG00000009351;ENSBTAG00000010542;ENSBTAG00000011333;…
Cellular Component	GO:0005634	nucleus	55	5832	0.000732	0.043532	ENSBTAG00000000700;ENSBTAG00000001600;ENSBTAG00000003552;ENSBTAG00000003746;ENSBTAG00000003934;ENSBTAG00000004240;ENSBTAG00000004315;ENSBTAG00000004448;ENSBTAG00000006328;ENSBTAG00000006786;ENSBTAG00000009121;ENSBTAG00000010542;ENSBTAG00000011875;ENSBTAG00000011904;ENSBTAG00000011981;ENSBTAG00000012142;ENSBTAG00000013153;ENSBTAG00000013271;ENSBTAG00000014230;ENSBTAG00000014752;ENSBTAG00000015504;…
Cellular Component	GO:0005856	cytoskeleton	20	1705	0.007063	0.067505	ENSBTAG00000000700;ENSBTAG00000004448;ENSBTAG00000005362;ENSBTAG00000005442;ENSBTAG00000006323;ENSBTAG00000008153;ENSBTAG00000009121;ENSBTAG00000010542;ENSBTAG00000011333;ENSBTAG00000011875;ENSBTAG00000012142;ENSBTAG00000013153;ENSBTAG00000013271;ENSBTAG00000013658;ENSBTAG00000014182;ENSBTAG00000017048;ENSBTAG00000030670;ENSBTAG00000044190;ENSBTAG00000048271;ENSBTAG00000054448
Cellular Component	GO:0005794	Golgi apparatus	11	1029	0.07354	0.18848	ENSBTAG00000001057;ENSBTAG00000003052;ENSBTAG00000006323;ENSBTAG00000008153;ENSBTAG00000011761;ENSBTAG00000012314;ENSBTAG00000014229;ENSBTAG00000014230;ENSBTAG00000020552;ENSBTAG00000032848;ENSBTAG00000044063
Cellular Component	GO:0005739	mitochondrion	11	1308	0.235599	0.389003	ENSBTAG00000001280;ENSBTAG00000003746;ENSBTAG00000003876;ENSBTAG00000010542;ENSBTAG00000017051;ENSBTAG00000017326;ENSBTAG00000018689;ENSBTAG00000030855;ENSBTAG00000031598;ENSBTAG00000032848;ENSBTAG00000037400
Cellular Component	GO:0005813	centrosome	8	551	0.028183	0.139306	ENSBTAG00000004448;ENSBTAG00000005362;ENSBTAG00000008153;ENSBTAG00000012142;ENSBTAG00000013658;ENSBTAG00000017048;ENSBTAG00000030670;ENSBTAG00000044190
Cellular Component	GO:0031982	vesicle	6	937	0.580086	0.67127	ENSBTAG00000005362;ENSBTAG00000006323;ENSBTAG00000010542;ENSBTAG00000011761;ENSBTAG00000014229;ENSBTAG00000044190
Cellular Component	GO:0000785	chromatin	5	512	0.244028	0.397871	ENSBTAG00000009121;ENSBTAG00000013271;ENSBTAG00000016105;ENSBTAG00000021289;ENSBTAG00000037457
Cellular Component	GO:0005764	lysosome	4	334	0.175465	0.322931	ENSBTAG00000000830;ENSBTAG00000012314;ENSBTAG00000025443;ENSBTAG00000035265
Cellular Component	GO:0045202	synapse	4	734	0.71255	0.768044	ENSBTAG00000006031;ENSBTAG00000011761;ENSBTAG00000013658;ENSBTAG00000054448
class	GO ID	Description	out (117)	All (16553)	pvalue	p.adjust	Genes
Molecular Function	GO:0005515	protein binding	70	7481	0.000993	0.053063	ENSBTAG00000000586;ENSBTAG00000000700;ENSBTAG00000001280;ENSBTAG00000001600;ENSBTAG00000001652;ENSBTAG00000002485;ENSBTAG00000003185;ENSBTAG00000003746;ENSBTAG00000004448;ENSBTAG00000004489;ENSBTAG00000004653;ENSBTAG00000005442;ENSBTAG00000006158;ENSBTAG00000006323;ENSBTAG00000006697;ENSBTAG00000006786;ENSBTAG00000008153;ENSBTAG00000009020;ENSBTAG00000009267;ENSBTAG00000009565;ENSBTAG00000010542;…
Molecular Function	GO:0043169	cation binding	28	2851	0.039556	0.202151	ENSBTAG00000001545;ENSBTAG00000003185;ENSBTAG00000006031;ENSBTAG00000006158;ENSBTAG00000012142;ENSBTAG00000012314;ENSBTAG00000014167;ENSBTAG00000014229;ENSBTAG00000015753;ENSBTAG00000016168;ENSBTAG00000016287;ENSBTAG00000016316;ENSBTAG00000016504;ENSBTAG00000017128;ENSBTAG00000017175;ENSBTAG00000017326;ENSBTAG00000018272;ENSBTAG00000018460;ENSBTAG00000018689;ENSBTAG00000020552;ENSBTAG00000020657;…
Molecular Function	GO:0019899	enzyme binding	20	1503	0.004185	0.102873	ENSBTAG00000001600;ENSBTAG00000006158;ENSBTAG00000006323;ENSBTAG00000006697;ENSBTAG00000009267;ENSBTAG00000009565;ENSBTAG00000012142;ENSBTAG00000012314;ENSBTAG00000012443;ENSBTAG00000013271;ENSBTAG00000014230;ENSBTAG00000016105;ENSBTAG00000016656;ENSBTAG00000017048;ENSBTAG00000025443;ENSBTAG00000032848;ENSBTAG00000039172;ENSBTAG00000043981;ENSBTAG00000048271;ENSBTAG00000054448
Molecular Function	GO:0003677	DNA binding	11	2031	0.864294	0.953193	ENSBTAG00000004240;ENSBTAG00000011981;ENSBTAG00000012142;ENSBTAG00000013271;ENSBTAG00000016105;ENSBTAG00000018272;ENSBTAG00000018689;ENSBTAG00000019354;ENSBTAG00000020552;ENSBTAG00000037457;ENSBTAG00000052736
Molecular Function	GO:0003723	RNA binding	10	1090	0.241476	0.471609	ENSBTAG00000000241;ENSBTAG00000003934;ENSBTAG00000004315;ENSBTAG00000006158;ENSBTAG00000006328;ENSBTAG00000013899;ENSBTAG00000016287;ENSBTAG00000022003;ENSBTAG00000030962;ENSBTAG00000037457
Molecular Function	GO:0005102	receptor binding	10	1222	0.362797	0.593389	ENSBTAG00000003746;ENSBTAG00000009565;ENSBTAG00000011761;ENSBTAG00000013271;ENSBTAG00000016999;ENSBTAG00000017455;ENSBTAG00000018307;ENSBTAG00000021964;ENSBTAG00000024688;ENSBTAG00000031725
Molecular Function	GO:0008289	lipid binding	8	629	0.077523	0.245277	ENSBTAG00000003746;ENSBTAG00000006323;ENSBTAG00000014229;ENSBTAG00000016504;ENSBTAG00000018004;ENSBTAG00000026371;ENSBTAG00000032848;ENSBTAG00000043981
Molecular Function	GO:0005524	ATP binding	7	1282	0.810655	0.917633	ENSBTAG00000001280;ENSBTAG00000014230;ENSBTAG00000016999;ENSBTAG00000017788;ENSBTAG00000018437;ENSBTAG00000018689;ENSBTAG00000044150
Molecular Function	GO:0033218	amide binding	5	205	0.015217	0.150612	ENSBTAG00000012314;ENSBTAG00000017128;ENSBTAG00000021896;ENSBTAG00000026673;ENSBTAG00000027569
Molecular Function	GO:0003729	mRNA binding	4	236	0.086381	0.260494	ENSBTAG00000004315;ENSBTAG00000016287;ENSBTAG00000030962;ENSBTAG00000037457
class	GO ID	Description	out (111)	All (17045)	pvalue	p.adjust	Genes
Biological Process	GO:0044237	cellular metabolic process	64	9227	0.257749	0.426943	ENSBTAG00000000207;ENSBTAG00000000700;ENSBTAG00000000830;ENSBTAG00000001600;ENSBTAG00000001652;ENSBTAG00000001895;ENSBTAG00000003552;ENSBTAG00000003934;ENSBTAG00000005362;ENSBTAG00000006031;ENSBTAG00000006158;ENSBTAG00000006323;ENSBTAG00000006328;ENSBTAG00000006697;ENSBTAG00000006786;ENSBTAG00000009020;ENSBTAG00000010542;ENSBTAG00000011761;ENSBTAG00000011904;ENSBTAG00000011981;ENSBTAG00000012142;…
Biological Process	GO:0032502	developmental process	52	4473	2.32e-06	0.001343	ENSBTAG00000000586;ENSBTAG00000000700;ENSBTAG00000000830;ENSBTAG00000001545;ENSBTAG00000003185;ENSBTAG00000003552;ENSBTAG00000003876;ENSBTAG00000005362;ENSBTAG00000005442;ENSBTAG00000006031;ENSBTAG00000006697;ENSBTAG00000008153;ENSBTAG00000009020;ENSBTAG00000009351;ENSBTAG00000009565;ENSBTAG00000010542;ENSBTAG00000011761;ENSBTAG00000012314;ENSBTAG00000013153;ENSBTAG00000014182;ENSBTAG00000014229;…
Biological Process	GO:0019538	protein metabolic process	38	5079	0.177886	0.365882	ENSBTAG00000000700;ENSBTAG00000001600;ENSBTAG00000001652;ENSBTAG00000001895;ENSBTAG00000003052;ENSBTAG00000006158;ENSBTAG00000006323;ENSBTAG00000006697;ENSBTAG00000009020;ENSBTAG00000011761;ENSBTAG00000011904;ENSBTAG00000012142;ENSBTAG00000012314;ENSBTAG00000013153;ENSBTAG00000013271;ENSBTAG00000013658;ENSBTAG00000014230;ENSBTAG00000015073;ENSBTAG00000016105;ENSBTAG00000016168;ENSBTAG00000016287;…
Biological Process	GO:0010467	gene expression	36	4740	0.162234	0.353924	ENSBTAG00000001652;ENSBTAG00000003052;ENSBTAG00000003552;ENSBTAG00000003934;ENSBTAG00000006328;ENSBTAG00000006697;ENSBTAG00000006786;ENSBTAG00000009020;ENSBTAG00000011761;ENSBTAG00000011904;ENSBTAG00000011981;ENSBTAG00000012314;ENSBTAG00000013271;ENSBTAG00000015504;ENSBTAG00000015553;ENSBTAG00000016105;ENSBTAG00000016287;ENSBTAG00000016397;ENSBTAG00000016656;ENSBTAG00000017048;ENSBTAG00000017326;…
Biological Process	GO:0007165	signal transduction	31	5307	0.797	0.836887	ENSBTAG00000000830;ENSBTAG00000001280;ENSBTAG00000002485;ENSBTAG00000003876;ENSBTAG00000004653;ENSBTAG00000006031;ENSBTAG00000006697;ENSBTAG00000009020;ENSBTAG00000009565;ENSBTAG00000010718;ENSBTAG00000011761;ENSBTAG00000013153;ENSBTAG00000013271;ENSBTAG00000013658;ENSBTAG00000013918;ENSBTAG00000014182;ENSBTAG00000015553;ENSBTAG00000016656;ENSBTAG00000016999;ENSBTAG00000017048;ENSBTAG00000017455;…
Biological Process	GO:0030154	cell differentiation	28	2837	0.013563	0.16332	ENSBTAG00000000700;ENSBTAG00000000830;ENSBTAG00000005442;ENSBTAG00000006031;ENSBTAG00000008153;ENSBTAG00000009020;ENSBTAG00000009351;ENSBTAG00000011761;ENSBTAG00000013153;ENSBTAG00000014182;ENSBTAG00000014229;ENSBTAG00000015073;ENSBTAG00000016105;ENSBTAG00000016287;ENSBTAG00000016397;ENSBTAG00000016999;ENSBTAG00000017051;ENSBTAG00000017455;ENSBTAG00000018272;ENSBTAG00000018307;ENSBTAG00000019354;…
Biological Process	GO:0006810	transport	26	3526	0.27057	0.438165	ENSBTAG00000001057;ENSBTAG00000001545;ENSBTAG00000001652;ENSBTAG00000003746;ENSBTAG00000003876;ENSBTAG00000004489;ENSBTAG00000005362;ENSBTAG00000006031;ENSBTAG00000006323;ENSBTAG00000010542;ENSBTAG00000011761;ENSBTAG00000012314;ENSBTAG00000014229;ENSBTAG00000017128;ENSBTAG00000017455;ENSBTAG00000018004;ENSBTAG00000019354;ENSBTAG00000021896;ENSBTAG00000021964;ENSBTAG00000026673;ENSBTAG00000030670;…
Biological Process	GO:0016310	phosphorylation	19	1849	0.029552	0.200377	ENSBTAG00000000700;ENSBTAG00000001652;ENSBTAG00000006323;ENSBTAG00000006697;ENSBTAG00000011761;ENSBTAG00000013153;ENSBTAG00000013271;ENSBTAG00000013658;ENSBTAG00000014230;ENSBTAG00000014752;ENSBTAG00000016105;ENSBTAG00000016656;ENSBTAG00000016999;ENSBTAG00000017455;ENSBTAG00000017788;ENSBTAG00000020791;ENSBTAG00000025443;ENSBTAG00000030801;ENSBTAG00000044150
Biological Process	GO:0008219	cell death	11	1338	0.253893	0.422365	ENSBTAG00000009565;ENSBTAG00000011761;ENSBTAG00000012142;ENSBTAG00000013153;ENSBTAG00000014182;ENSBTAG00000017326;ENSBTAG00000022155;ENSBTAG00000024688;ENSBTAG00000025443;ENSBTAG00000031725;ENSBTAG00000032848
Biological Process	GO:0007155	cell adhesion	9	1136	0.320808	0.477813	ENSBTAG00000000700;ENSBTAG00000009565;ENSBTAG00000013153;ENSBTAG00000014182;ENSBTAG00000017455;ENSBTAG00000020657;ENSBTAG00000020791;ENSBTAG00000021964;ENSBTAG00000032848
