# Supplementary material for: Identification and functional analysis of circular RNAs during mitochondrial damage induced by infectious bovine rhinotracheitis virus infection in Madin–Darby bovine kidney cells
Source: Research Square preprint supplement (doi:10.21203/rs.3.rs-6754910/v1), 2025-06-20
Supplement: Supplementary file 19 [file dca38ff7401de5706993242e.xlsx]

## Sheet: Table S21
Table S21: KEGG enrichment analysis of RBPs
Pathway	out (506)	All (9497)	Pvalue	Qvalue	Pathway ID	Genes	K_IDs
Ribosome	87	311	1.98875e-40	5.62816e-38	ko03010	ENSBTAG00000012594;ENSBTAG00000018360;ENSBTAG00000020795;ENSBTAG00000038896;ENSBTAG00000024781;ENSBTAG00000019253;ENSBTAG00000025385;ENSBTAG00000001777;ENSBTAG00000000417;ENSBTAG00000018628;ENSBTAG00000018155;ENSBTAG00000031723;ENSBTAG00000005142;ENSBTAG00000003205;ENSBTAG00000006767;ENSBTAG00000012752;ENSBTAG00000001520;ENSBTAG00000001832;ENSBTAG00000006487;ENSBTAG00000019457;ENSBTAG00000049833;…	K02990+K02863+K02971+K02976+K02879+K02929+K02870+K02943+K02935+K02905+K02963+K02934+K02922+K02918+K02871+K02886+K02895+K02864+K02997+K02890+K02924+K02930+K02959+K02926+K02894+K02885+K02989+K02878+K02985+K02942+K02916+K02974+K02998+K02978+K02961+K02950+K02960+K02932+K02951+K02939+K02876+K02866+K02969+K02973+K02980+K02901+K02867+K02936+K02970+K02987+K02966+K02967+K02896+K02958+K02992+K02978+K02975+…
Spliceosome	42	174	3.77572e-17	5.34264e-15	ko03040	ENSBTAG00000035174;ENSBTAG00000047652;ENSBTAG00000011645;ENSBTAG00000001697;ENSBTAG00000016271;ENSBTAG00000008498;ENSBTAG00000001553;ENSBTAG00000014366;ENSBTAG00000004590;ENSBTAG00000008136;ENSBTAG00000017244;ENSBTAG00000008457;ENSBTAG00000020012;ENSBTAG00000007913;ENSBTAG00000034506;ENSBTAG00000009077;ENSBTAG00000018258;ENSBTAG00000003390;ENSBTAG00000025441;ENSBTAG00000025442;ENSBTAG00000004571;…	K12880+K12885+K12836+K12897+K11098+K12881+K12741+K10599+K09567+K06063+K12817+K12819+K12860+K12863+K11099+K11091+K12891+K12825+K03283+K03283+K12662+K12815+K11096+K12832+K12862+K11087+K03283+K12830+K12836+K12855+K12865+K12623+K12886+K12877+K12883+K11095+K12892+K12733+K12849+K12845+K12624+K12627
Nucleocytoplasmic transport	42	197	4.38489e-15	4.13641e-13	ko03013	ENSBTAG00000035174;ENSBTAG00000009647;ENSBTAG00000010792;ENSBTAG00000031146;ENSBTAG00000017321;ENSBTAG00000008498;ENSBTAG00000005683;ENSBTAG00000014388;ENSBTAG00000008664;ENSBTAG00000020739;ENSBTAG00000002973;ENSBTAG00000006543;ENSBTAG00000007702;ENSBTAG00000021293;ENSBTAG00000009488;ENSBTAG00000006250;ENSBTAG00000014337;ENSBTAG00000002282;ENSBTAG00000009969;ENSBTAG00000001988;ENSBTAG00000000359;…	K12880+K14291+K14299+K14294+K12160+K12881+K00784+K03246+K03754+K14285+K03539+K03252+K14523+K13151+K14284+K14323+K03242+K03113+K14325+K03251+K03245+K07205+K12160+K13135+K13136+K03538+K03253+K07562+K03247+K14004+K13176+K03231+K13137+K14525+K13126+K12877+K12883+K13129+K03237+K13134+K07936+K03239
Ribosome biogenesis in eukaryotes	20	83	8.29315e-09	5.8674e-07	ko03008	ENSBTAG00000006449;ENSBTAG00000020381;ENSBTAG00000018667;ENSBTAG00000020739;ENSBTAG00000002973;ENSBTAG00000007702;ENSBTAG00000009488;ENSBTAG00000011263;ENSBTAG00000013671;ENSBTAG00000004051;ENSBTAG00000006374;ENSBTAG00000005843;ENSBTAG00000003225;ENSBTAG00000002223;ENSBTAG00000016228;ENSBTAG00000016295;ENSBTAG00000031564;ENSBTAG00000006843;ENSBTAG00000006104;ENSBTAG00000055033	K14570+K14566+K11108+K14285+K03539+K14523+K14284+K03264+K14567+K14574+K11129+K13288+K14561+K03538+K07562+K14525+K14538+K14549+K12845+K07936
mRNA surveillance pathway	21	112	3.6585e-07	2.07071e-05	ko03015	ENSBTAG00000019735;ENSBTAG00000031146;ENSBTAG00000003547;ENSBTAG00000008498;ENSBTAG00000020739;ENSBTAG00000006493;ENSBTAG00000009488;ENSBTAG00000006250;ENSBTAG00000010207;ENSBTAG00000009969;ENSBTAG00000012146;ENSBTAG00000006884;ENSBTAG00000002090;ENSBTAG00000010227;ENSBTAG00000002575;ENSBTAG00000004054;ENSBTAG00000012447;ENSBTAG00000046358;ENSBTAG00000019235;ENSBTAG00000008873;ENSBTAG00000011198	K14403+K14294+K14407+K12881+K14285+K14399+K14284+K14323+K14397+K14325+K06269+K14396+K14404+K14402+K15544+K14376+K06269+K13126+K12877+K12883+K06269
RNA degradation	17	86	2.22471e-06	0.000104932	ko03018	ENSBTAG00000004834;ENSBTAG00000015944;ENSBTAG00000011855;ENSBTAG00000048071;ENSBTAG00000018036;ENSBTAG00000005534;ENSBTAG00000001612;ENSBTAG00000049002;ENSBTAG00000018925;ENSBTAG00000011419;ENSBTAG00000008578;ENSBTAG00000006142;ENSBTAG00000046358;ENSBTAG00000018749;ENSBTAG00000003807;ENSBTAG00000002332;ENSBTAG00000012649	K12607+K12602+K12586+K03679+K12581+K01689+K12620+K12592+K03681+K04043+K12623+K14442+K13126+K16855+K12606+K12624+K12627
RNA polymerase	10	33	5.13718e-06	0.000207689	ko03020	ENSBTAG00000031061;ENSBTAG00000018969;ENSBTAG00000009483;ENSBTAG00000013259;ENSBTAG00000001856;ENSBTAG00000008642;ENSBTAG00000013910;ENSBTAG00000005446;ENSBTAG00000021637;ENSBTAG00000022539	K03007+K03027+K03015+K03018+K03011+K03020+K03024+K03008+K03023+K03009
Protein export	7	24	0.000182928	0.00647107	ko03060	ENSBTAG00000019508;ENSBTAG00000014105;ENSBTAG00000007662;ENSBTAG00000014353;ENSBTAG00000019085;ENSBTAG00000004937;ENSBTAG00000012803	K10956+K13431+K09490+K03104+K03106+K10956+K03105
Salmonella infection	26	246	0.000635008	0.0199675	ko05132	ENSBTAG00000006270;ENSBTAG00000003362;ENSBTAG00000005620;ENSBTAG00000000778;ENSBTAG00000024605;ENSBTAG00000016420;ENSBTAG00000025313;ENSBTAG00000006982;ENSBTAG00000046385;ENSBTAG00000020353;ENSBTAG00000012774;ENSBTAG00000002953;ENSBTAG00000001700;ENSBTAG00000004915;ENSBTAG00000004279;ENSBTAG00000018274;ENSBTAG00000036009;ENSBTAG00000046248;ENSBTAG00000004242;ENSBTAG00000021151;ENSBTAG00000007725;…	K04079+K09487+K02985+K04079+K10418+K02105+K10418+K07889+K07887+K05759+K07898+K03671+K04393+K05759+K04513+K02373+K03175+K05757+K05757+K10352+K07937+K07937+K17092+K05759+K08738+K08738
Protein processing in endoplasmic reticulum	21	190	0.00117091	0.0331368	ko04141	ENSBTAG00000019508;ENSBTAG00000006270;ENSBTAG00000006533;ENSBTAG00000007662;ENSBTAG00000016858;ENSBTAG00000007223;ENSBTAG00000006665;ENSBTAG00000022731;ENSBTAG00000003362;ENSBTAG00000000778;ENSBTAG00000000434;ENSBTAG00000025441;ENSBTAG00000025442;ENSBTAG00000021226;ENSBTAG00000013162;ENSBTAG00000017825;ENSBTAG00000031544;ENSBTAG00000016265;ENSBTAG00000004937;ENSBTAG00000005355;ENSBTAG00000016311	K10956+K04079+K14012+K09490+K07953+K10099+K09586+K13249+K09487+K04079+K09542+K03283+K03283+K07953+K03283+K14004+K04452+K09502+K10956+K09556+K03237
Aminoacyl-tRNA biosynthesis	8	47	0.00307073	0.0790015	ko00970	ENSBTAG00000012962;ENSBTAG00000007651;ENSBTAG00000021630;ENSBTAG00000014261;ENSBTAG00000012791;ENSBTAG00000018928;ENSBTAG00000018847;ENSBTAG00000004679	K01875+K01868+K00604+K01868+K02435+K01886+K01892+K01867
Legionellosis	10	69	0.00336431	0.0793417	ko05134	ENSBTAG00000016858;ENSBTAG00000025441;ENSBTAG00000025442;ENSBTAG00000021226;ENSBTAG00000013162;ENSBTAG00000007725;ENSBTAG00000021685;ENSBTAG00000006785;ENSBTAG00000039522;ENSBTAG00000022613	K07953+K03283+K03283+K07953+K03283+K07937+K03231+K07937+K08738+K08738
Leukocyte transendothelial migration	14	123	0.00571126	0.12433	ko04670	ENSBTAG00000018255;ENSBTAG00000003418;ENSBTAG00000051907;ENSBTAG00000016420;ENSBTAG00000011215;ENSBTAG00000001700;ENSBTAG00000011043;ENSBTAG00000004279;ENSBTAG00000020676;ENSBTAG00000008967;ENSBTAG00000039160;ENSBTAG00000050904;ENSBTAG00000010347;ENSBTAG00000017846	K05699+K05763+K08009+K02105+K05699+K04393+K07860+K04513+K01403+K07836+K05730+K04353+K08007+K06089
Bacterial invasion of epithelial cells	10	79	0.00888059	0.179515	ko05100	ENSBTAG00000011307;ENSBTAG00000021219;ENSBTAG00000016420;ENSBTAG00000016708;ENSBTAG00000001700;ENSBTAG00000004279;ENSBTAG00000046248;ENSBTAG00000004242;ENSBTAG00000002608;ENSBTAG00000013173	K01528+K13737+K02105+K04646+K04393+K04513+K05757+K05757+K16942+K16938
Sulfur relay system	3	9	0.00992213	0.187197	ko04122	ENSBTAG00000020943;ENSBTAG00000025612;ENSBTAG00000039212	K14169+K12161+K14168
Endocytosis	23	261	0.0120517	0.213165	ko04144	ENSBTAG00000000411;ENSBTAG00000011307;ENSBTAG00000008040;ENSBTAG00000051755;ENSBTAG00000006982;ENSBTAG00000050712;ENSBTAG00000046385;ENSBTAG00000016708;ENSBTAG00000001700;ENSBTAG00000025441;ENSBTAG00000025442;ENSBTAG00000004279;ENSBTAG00000036009;ENSBTAG00000046248;ENSBTAG00000004242;ENSBTAG00000010584;ENSBTAG00000018857;ENSBTAG00000013162;ENSBTAG00000002475;ENSBTAG00000007725;ENSBTAG00000017246;…	K12182+K01528+K19366+K07938+K07889+K12483+K07887+K04646+K04393+K03283+K03283+K04513+K03175+K05757+K05757+K11827+K07879+K03283+K07905+K07937+K04551+K07937+K07901
DNA replication	6	38	0.0143247	0.238464	ko03030	ENSBTAG00000020149;ENSBTAG00000002620;ENSBTAG00000009661;ENSBTAG00000000064;ENSBTAG00000010721;ENSBTAG00000005577	K10744+K10742+K10743+K04799+K02541+K10745
Pyruvate metabolism	6	42	0.0227777	0.358115	ko00620	ENSBTAG00000019998;ENSBTAG00000009462;ENSBTAG00000019700;ENSBTAG00000019295;ENSBTAG00000008683;ENSBTAG00000019603	K01069+K00026+K01958+K00025+K00016+K00016
Citrate cycle (TCA cycle)	5	32	0.0257386	0.38337	ko00020	ENSBTAG00000009462;ENSBTAG00000019700;ENSBTAG00000019295;ENSBTAG00000014093;ENSBTAG00000006429	K00026+K01958+K00025+K00031+K01681
Pancreatic secretion	11	109	0.0303003	0.42875	ko04972	ENSBTAG00000010551;ENSBTAG00000002788;ENSBTAG00000006541;ENSBTAG00000026732;ENSBTAG00000013300;ENSBTAG00000004279;ENSBTAG00000001246;ENSBTAG00000008967;ENSBTAG00000050904;ENSBTAG00000008338;ENSBTAG00000038696	K01539+K07886+K05853+K01047+K04936+K04513+K01539+K07836+K04353+K05858+K07901
